# Supplementary material for: Poised PABP-RNA hubs implement signal-dependent mRNA decay in development
Source: Research Square preprint supplement (doi:10.21203/rs.3.rs-3227673/v1), 2023-08-07
Supplement: Supplementary file 1 [file 130de242c2b2928ce25fd3aa.xlsx]

## Sheet: 3UTR-termini metaprofiles
Supplementary Table S6 | This table contains values related to the metaprofiles of expression-normalised crosslink coverage downstream of 3'end termini. Values marked as "mean CPM per TPM" indicate the mean of expression-normalised coverage across genes in DOWN or Control+UP group, with respect to regulation by phosphorylated LIN28A (Methods). "CI max" and "CI min" indicate the upper and lower li…
Values	CI max														CI min														mean CPM per TPM
Protein	LIN28A						PABPC1				PABPC4				LIN28A						PABPC1				PABPC4				LIN28A						PABPC1				PABPC4
Condition	S200A_FCL		S200WT_2iL		S200WT_FCL		KO_FCL		S200WT_FCL		KO_FCL		S200WT_FCL		S200A_FCL		S200WT_2iL		S200WT_FCL		KO_FCL		S200WT_FCL		KO_FCL		S200WT_FCL		S200A_FCL		S200WT_2iL		S200WT_FCL		KO_FCL		S200WT_FCL		KO_FCL		S200WT_FCL
Group	DOWN	UP+CONTROL	DOWN	UP+CONTROL	DOWN	UP+CONTROL	DOWN	UP+CONTROL	DOWN	UP+CONTROL	DOWN	UP+CONTROL	DOWN	UP+CONTROL	DOWN	UP+CONTROL	DOWN	UP+CONTROL	DOWN	UP+CONTROL	DOWN	UP+CONTROL	DOWN	UP+CONTROL	DOWN	UP+CONTROL	DOWN	UP+CONTROL	DOWN	UP+CONTROL	DOWN	UP+CONTROL	DOWN	UP+CONTROL	DOWN	UP+CONTROL	DOWN	UP+CONTROL	DOWN	UP+CONTROL	DOWN	UP+CONTROL
Position
-500	0.00294556	0.00206822	0.00210323	0.00168045	0.00408107	0.00125157	0.00355843	0.00252021	0.00861884	0.00227712	0.00162315	0.00125501	0.0031124	0.000917579	0.000795928	0.000872996	0.00118312	0.00112637	0.00177299	0.000719887	0.00199515	0.00182287	0.00415087	0.00165719	0.000921721	0.000814645	0.00161638	0.000581651	0.00187074	0.00147061	0.00164317	0.00140341	0.00292703	0.000985727	0.00277679	0.00217154	0.00638486	0.00196716	0.00127244	0.00103483	0.00236439	0.000749615
-499	0.00294556	0.00206822	0.00210323	0.00168045	0.00408107	0.00125157	0.00355843	0.00252021	0.00861884	0.00227712	0.00162315	0.00125501	0.0031124	0.000917579	0.000795928	0.000872996	0.00118312	0.00112637	0.00177299	0.000719887	0.00199515	0.00182287	0.00415087	0.00165719	0.000921721	0.000814645	0.00161638	0.000581651	0.00187074	0.00147061	0.00164317	0.00140341	0.00292703	0.000985727	0.00277679	0.00217154	0.00638486	0.00196716	0.00127244	0.00103483	0.00236439	0.000749615
-498	0.00294556	0.00206822	0.00210323	0.00168045	0.00408107	0.00125157	0.00355843	0.00252021	0.00861884	0.00227712	0.00162315	0.00125501	0.0031124	0.000917579	0.000795928	0.000872996	0.00118312	0.00112637	0.00177299	0.000719887	0.00199515	0.00182287	0.00415087	0.00165719	0.000921721	0.000814645	0.00161638	0.000581651	0.00187074	0.00147061	0.00164317	0.00140341	0.00292703	0.000985727	0.00277679	0.00217154	0.00638486	0.00196716	0.00127244	0.00103483	0.00236439	0.000749615
-497	0.00294556	0.00206822	0.00210323	0.00168045	0.00408107	0.00125157	0.00355843	0.00252021	0.00861884	0.00227712	0.00162315	0.00125501	0.0031124	0.000917579	0.000795928	0.000872996	0.00118312	0.00112637	0.00177299	0.000719887	0.00199515	0.00182287	0.00415087	0.00165719	0.000921721	0.000814645	0.00161638	0.000581651	0.00187074	0.00147061	0.00164317	0.00140341	0.00292703	0.000985727	0.00277679	0.00217154	0.00638486	0.00196716	0.00127244	0.00103483	0.00236439	0.000749615
-496	0.00294556	0.00206822	0.00210323	0.00168045	0.00408107	0.00125157	0.00355843	0.00252021	0.00861884	0.00227712	0.00162315	0.00125501	0.0031124	0.000917579	0.000795928	0.000872996	0.00118312	0.00112637	0.00177299	0.000719887	0.00199515	0.00182287	0.00415087	0.00165719	0.000921721	0.000814645	0.00161638	0.000581651	0.00187074	0.00147061	0.00164317	0.00140341	0.00292703	0.000985727	0.00277679	0.00217154	0.00638486	0.00196716	0.00127244	0.00103483	0.00236439	0.000749615
-495	0.00294556	0.00206822	0.00210323	0.00168045	0.00408107	0.00125157	0.00355843	0.00252021	0.00861884	0.00227712	0.00162315	0.00125501	0.0031124	0.000917579	0.000795928	0.000872996	0.00118312	0.00112637	0.00177299	0.000719887	0.00199515	0.00182287	0.00415087	0.00165719	0.000921721	0.000814645	0.00161638	0.000581651	0.00187074	0.00147061	0.00164317	0.00140341	0.00292703	0.000985727	0.00277679	0.00217154	0.00638486	0.00196716	0.00127244	0.00103483	0.00236439	0.000749615
-494	0.00294556	0.00206822	0.00210323	0.00168045	0.00408107	0.00125157	0.00355843	0.00252021	0.00861884	0.00227712	0.00162315	0.00125501	0.0031124	0.000917579	0.000795928	0.000872996	0.00118312	0.00112637	0.00177299	0.000719887	0.00199515	0.00182287	0.00415087	0.00165719	0.000921721	0.000814645	0.00161638	0.000581651	0.00187074	0.00147061	0.00164317	0.00140341	0.00292703	0.000985727	0.00277679	0.00217154	0.00638486	0.00196716	0.00127244	0.00103483	0.00236439	0.000749615
-493	0.00294556	0.00206822	0.00210323	0.00168045	0.00408107	0.00125157	0.00355843	0.00252021	0.00861884	0.00227712	0.00162315	0.00125501	0.0031124	0.000917579	0.000795928	0.000872996	0.00118312	0.00112637	0.00177299	0.000719887	0.00199515	0.00182287	0.00415087	0.00165719	0.000921721	0.000814645	0.00161638	0.000581651	0.00187074	0.00147061	0.00164317	0.00140341	0.00292703	0.000985727	0.00277679	0.00217154	0.00638486	0.00196716	0.00127244	0.00103483	0.00236439	0.000749615
-492	0.00294556	0.00206822	0.00210323	0.00168045	0.00408107	0.00125157	0.00355843	0.00252021	0.00861884	0.00227712	0.00162315	0.00125501	0.0031124	0.000917579	0.000795928	0.000872996	0.00118312	0.00112637	0.00177299	0.000719887	0.00199515	0.00182287	0.00415087	0.00165719	0.000921721	0.000814645	0.00161638	0.000581651	0.00187074	0.00147061	0.00164317	0.00140341	0.00292703	0.000985727	0.00277679	0.00217154	0.00638486	0.00196716	0.00127244	0.00103483	0.00236439	0.000749615
-491	0.00294556	0.00206822	0.00210323	0.00168045	0.00408107	0.00125157	0.00355843	0.00252021	0.00861884	0.00227712	0.00162315	0.00125501	0.0031124	0.000917579	0.000795928	0.000872996	0.00118312	0.00112637	0.00177299	0.000719887	0.00199515	0.00182287	0.00415087	0.00165719	0.000921721	0.000814645	0.00161638	0.000581651	0.00187074	0.00147061	0.00164317	0.00140341	0.00292703	0.000985727	0.00277679	0.00217154	0.00638486	0.00196716	0.00127244	0.00103483	0.00236439	0.000749615
-490	0.00294556	0.00206822	0.00210323	0.00168045	0.00408107	0.00125157	0.00355843	0.00252021	0.00861884	0.00227712	0.00162315	0.00125501	0.0031124	0.000917579	0.000795928	0.000872996	0.00118312	0.00112637	0.00177299	0.000719887	0.00199515	0.00182287	0.00415087	0.00165719	0.000921721	0.000814645	0.00161638	0.000581651	0.00187074	0.00147061	0.00164317	0.00140341	0.00292703	0.000985727	0.00277679	0.00217154	0.00638486	0.00196716	0.00127244	0.00103483	0.00236439	0.000749615
-489	0.00291702	0.00207249	0.00210214	0.00166856	0.00404258	0.00126868	0.00360816	0.00252375	0.00875204	0.00227336	0.00163025	0.00125301	0.00316501	0.000911215	0.000804053	0.00088421	0.00118067	0.00113034	0.00175185	0.000734906	0.00201548	0.001831	0.00418266	0.00166485	0.000922938	0.000815091	0.00163922	0.00058843	0.00186054	0.00147835	0.00164141	0.00139945	0.00289722	0.00100179	0.00281182	0.00217738	0.00646735	0.0019691	0.0012766	0.00103405	0.00240212	0.000749823
-488	0.0029106	0.00206493	0.00209175	0.00164944	0.00399948	0.00128344	0.00366713	0.00252705	0.00890336	0.00227141	0.00164324	0.00125159	0.00322844	0.00090586	0.000806966	0.000891104	0.00117328	0.00113225	0.00173025	0.000747955	0.0020445	0.00183844	0.00423798	0.0016726	0.000928097	0.000814701	0.00166555	0.00059315	0.00185879	0.00147802	0.00163252	0.00139084	0.00286487	0.0010157	0.00285582	0.00218274	0.00657067	0.00197201	0.00128567	0.00103314	0.002447	0.000749505
-487	0.00292804	0.00205438	0.00208356	0.00162851	0.0039558	0.00129537	0.00372351	0.00252823	0.00903884	0.00226939	0.00165928	0.00124884	0.00329671	0.000902383	0.000808932	0.000896553	0.00116367	0.00113367	0.00171065	0.000757915	0.0020755	0.00184418	0.0043009	0.00167799	0.000933748	0.000812729	0.00169531	0.000596614	0.00186849	0.00147546	0.00162361	0.00138109	0.00283323	0.00102664	0.00289951	0.0021862	0.00666987	0.00197369	0.00129651	0.00103078	0.00249601	0.000749498
-486	0.00295525	0.00203701	0.00208768	0.0016113	0.00391773	0.00130704	0.00377881	0.00253321	0.00917592	0.00227316	0.00167729	0.00124793	0.00336536	0.000902653	0.00081183	0.000897986	0.00115355	0.00113468	0.00169788	0.000767021	0.00210412	0.00184967	0.00435679	0.00168231	0.000939211	0.000810526	0.00172554	0.000600255	0.00188354	0.0014675	0.00162061	0.00137299	0.0028078	0.00103703	0.00294146	0.00219144	0.00676635	0.00197773	0.00130825	0.00102923	0.00254545	0.000751454
-485	0.00299758	0.00201476	0.00210651	0.0015985	0.00390074	0.00131403	0.00383893	0.00254211	0.00932362	0.00228126	0.00169814	0.00125373	0.00343769	0.00090722	0.0008191	0.000893527	0.00114186	0.00113314	0.0016967	0.000773165	0.00212895	0.00185488	0.0044003	0.00168582	0.00094511	0.000809919	0.00175632	0.000602987	0.00190834	0.00145415	0.00162418	0.00136582	0.00279872	0.0010436	0.00298394	0.00219849	0.00686196	0.00198354	0.00132163	0.00103182	0.00259701	0.000755104
-484	0.00305497	0.00199544	0.00213157	0.00159122	0.00390583	0.00131356	0.00389739	0.0025537	0.00945929	0.00229201	0.00171856	0.00126586	0.00352068	0.000913157	0.000825599	0.000886046	0.00112935	0.00113004	0.00169972	0.000774782	0.00215247	0.00186044	0.0044403	0.0016892	0.000950075	0.000810645	0.00178998	0.000603791	0.00194029	0.00144074	0.00163046	0.00136063	0.00280277	0.00104417	0.00302493	0.00220707	0.00694979	0.00199061	0.00133432	0.00103825	0.00265533	0.000758474
-483	0.00316482	0.00198295	0.00216229	0.00158902	0.00393321	0.00130955	0.00394796	0.00256686	0.00955587	0.00230557	0.00173734	0.00128228	0.00360507	0.000918672	0.0008046	0.000879567	0.00111484	0.00112713	0.00170009	0.000774394	0.00217858	0.0018662	0.00449406	0.00169321	0.000956293	0.000811603	0.00182574	0.000603777	0.00198471	0.00143126	0.00163857	0.00135807	0.00281665	0.00104197	0.00306327	0.00221653	0.00702496	0.00199939	0.00134681	0.00104694	0.0027154	0.000761225
-482	0.0033213	0.0019681	0.00219857	0.00159063	0.00397582	0.00130391	0.00399252	0.00258153	0.00960832	0.00231806	0.00175824	0.00130138	0.00368264	0.000924047	0.000761528	0.000870697	0.00109842	0.00112562	0.00170059	0.000772604	0.00220704	0.00187252	0.00456121	0.00169676	0.000966404	0.000812793	0.00185968	0.000604104	0.00204141	0.0014194	0.0016485	0.00135813	0.00283821	0.00103826	0.00309978	0.00222703	0.00708476	0.00200741	0.00136232	0.00105709	0.00277116	0.000764075
-481	0.00348193	0.00195047	0.00223708	0.00159419	0.00401742	0.00129806	0.00402765	0.00259915	0.00959703	0.00232835	0.0017793	0.00132376	0.00375365	0.000929033	0.000719396	0.000860318	0.00108313	0.00112506	0.00170611	0.00077048	0.00223396	0.00188028	0.00463966	0.00169992	0.000978102	0.000814342	0.00189146	0.000604597	0.00210066	0.00140539	0.00166011	0.00135962	0.00286177	0.00103427	0.0031308	0.00223972	0.00711835	0.00201413	0.0013787	0.00106905	0.00282255	0.000766815
-480	0.00365532	0.00194917	0.00228528	0.00159933	0.00407251	0.00129151	0.0040557	0.00262088	0.00953179	0.00233957	0.00180269	0.00134886	0.00381679	0.000932277	0.000680202	0.000854998	0.00107027	0.00112424	0.00172075	0.000768255	0.0022541	0.00189112	0.00471229	0.00170559	0.000990617	0.00081447	0.0019212	0.000605294	0.00216776	0.00140208	0.00167777	0.00136178	0.00289663	0.00102988	0.0031549	0.002256	0.00712204	0.00202258	0.00139665	0.00108166	0.002869	0.000768786
-479	0.00384504	0.00197079	0.00234629	0.00161202	0.0041515	0.0012849	0.00406902	0.00264459	0.00941276	0.00235199	0.00182462	0.00137615	0.00386023	0.00093423	0.000648856	0.00085555	0.00106096	0.00112467	0.00174528	0.000765709	0.00226193	0.00190399	0.00475702	0.00171289	0.00100044	0.000814314	0.00194421	0.000606295	0.00224695	0.00141317	0.00170363	0.00136834	0.00294839	0.0010253	0.00316548	0.00227429	0.00708489	0.00203244	0.00141253	0.00109523	0.00290222	0.000770262
-478	0.00405131	0.00200591	0.00241715	0.00163454	0.0042283	0.00127894	0.00405486	0.00266708	0.00922634	0.002363	0.00183382	0.00140581	0.00387273	0.000936021	0.000622924	0.000860316	0.00105517	0.00112707	0.00176489	0.000763987	0.00225635	0.00191624	0.00477512	0.00171993	0.00100334	0.000815712	0.00195399	0.000608333	0.00233712	0.00143311	0.00173616	0.0013808	0.00299659	0.00102146	0.0031556	0.00229166	0.00700073	0.00204146	0.00141858	0.00111076	0.00291336	0.000772177
-477	0.00427975	0.00205465	0.00248708	0.00166086	0.0042973	0.00127238	0.00402691	0.00268746	0.00900728	0.00237332	0.00183219	0.00143718	0.00385583	0.000938461	0.000602656	0.00087083	0.00105197	0.00112936	0.00177815	0.000762639	0.00224444	0.00192709	0.0047747	0.00172786	0.00100234	0.000818107	0.00194889	0.000611865	0.0024412	0.00146274	0.00176952	0.00139511	0.00303772	0.00101751	0.00313568	0.00230727	0.00689099	0.00205059	0.00141727	0.00112765	0.00290236	0.000775163
-476	0.00451485	0.00211111	0.00254227	0.00168716	0.00435685	0.00126624	0.00399174	0.00270174	0.00877059	0.00238033	0.00182613	0.00146756	0.00381814	0.000939969	0.000583214	0.000884393	0.00105102	0.00113117	0.00178341	0.00075975	0.00223062	0.00193468	0.00476605	0.00173433	0.0010009	0.000820465	0.00193335	0.000614603	0.00254903	0.00149775	0.00179665	0.00140916	0.00307013	0.001013	0.00311118	0.00231821	0.00676832	0.00205733	0.00141352	0.00114401	0.00287575	0.000777286
-475	0.0047372	0.00216593	0.00257591	0.00171182	0.00438403	0.00126431	0.00394654	0.00270764	0.00851408	0.00238377	0.00181715	0.00149289	0.00375889	0.000938647	0.000554508	0.000898307	0.00105296	0.0011342	0.00177045	0.000758109	0.0022161	0.00193897	0.00475456	0.00173957	0.000999566	0.00082196	0.00190747	0.00061606	0.00264586	0.00153212	0.00181443	0.00142301	0.00307724	0.00101121	0.00308132	0.00232331	0.00663432	0.00206167	0.00140836	0.00115743	0.00283318	0.000777354
-474	0.00493173	0.00221315	0.0025882	0.00173015	0.00437711	0.00126611	0.00389828	0.00270512	0.00825544	0.00238227	0.00180572	0.00151317	0.00367656	0.000935188	0.000518818	0.000911558	0.001058	0.001138	0.00174341	0.00075907	0.00220086	0.00193996	0.00473822	0.00174338	0.000997697	0.000822548	0.00187345	0.000617499	0.00272527	0.00156235	0.0018231	0.00143407	0.00306026	0.00101259	0.00304957	0.00232254	0.00649683	0.00206282	0.00140171	0.00116786	0.00277501	0.000776344
-473	0.00497775	0.0022462	0.00257113	0.00174191	0.00433268	0.00126653	0.00385162	0.00269722	0.00801241	0.00237631	0.00179139	0.00152749	0.00358582	0.000931063	0.000527572	0.000920274	0.00107031	0.00114119	0.00171813	0.000759283	0.00218297	0.00193825	0.0047108	0.00174536	0.000992372	0.000823078	0.00183584	0.000619175	0.00275266	0.00158324	0.00182072	0.00144155	0.0030254	0.00101291	0.0030173	0.00231774	0.00636161	0.00206084	0.00139188	0.00117528	0.00271083	0.000775119
-472	0.00488707	0.00227185	0.00253343	0.00174939	0.00425023	0.00126628	0.00380493	0.00268563	0.00779008	0.00237051	0.00177068	0.00153465	0.00349581	0.000926613	0.000579049	0.000927349	0.00108805	0.0011433	0.00168984	0.000760096	0.00216301	0.00193478	0.00467419	0.00174738	0.000980915	0.00082361	0.00179701	0.000620397	0.00273306	0.0015996	0.00181074	0.00144635	0.00297004	0.00101319	0.00298397	0.0023102	0.00623213	0.00205894	0.00137579	0.00117913	0.00264641	0.000773505
-471	0.00477851	0.00229481	0.00249427	0.00175631	0.00416128	0.00126629	0.00375779	0.002668	0.00760358	0.00236621	0.00174572	0.00153455	0.00339932	0.000921076	0.000625142	0.000934395	0.00110478	0.00114526	0.00165937	0.000761271	0.00214339	0.00192801	0.00463757	0.00174964	0.000966051	0.000824942	0.00175433	0.000620607	0.00270183	0.0016146	0.00179952	0.00145078	0.00291033	0.00101378	0.00295059	0.002298	0.00612058	0.00205793	0.00135589	0.00117975	0.00257682	0.000770842
-470	0.00463695	0.00228959	0.00244431	0.00175923	0.00407178	0.00126421	0.00370407	0.002642	0.00744653	0.00235853	0.00171504	0.00152523	0.00328896	0.000914579	0.000663005	0.000933733	0.00111854	0.00114663	0.0016317	0.000761253	0.00212907	0.00191638	0.00461011	0.001749	0.000951039	0.000828699	0.00170624	0.000619789	0.00264998	0.00161166	0.00178143	0.00145293	0.00285174	0.00101273	0.00291657	0.00227919	0.00602832	0.00205377	0.00133304	0.00117696	0.0024976	0.000767184
-469	0.00446489	0.00225436	0.0023802	0.00175008	0.003966	0.00125763	0.0036512	0.0026087	0.00731373	0.0023448	0.00168144	0.00150585	0.00317421	0.000907513	0.000692026	0.000923881	0.00112871	0.0011453	0.0015977	0.000759014	0.00212201	0.00190073	0.00459393	0.00174458	0.00093774	0.000831678	0.00165596	0.000618477	0.00257846	0.00158912	0.00175445	0.00144769	0.00278185	0.00100832	0.00288661	0.00225471	0.00595383	0.00204469	0.00130959	0.00116876	0.00241509	0.000762995
-468	0.00426444	0.00221074	0.00230872	0.00173193	0.00386524	0.00124858	0.0036151	0.00257285	0.00722576	0.00232862	0.00165425	0.00147819	0.00306671	0.000899957	0.0007137	0.000909422	0.00113535	0.00114213	0.00156906	0.000755055	0.00211994	0.00188373	0.0045842	0.00173868	0.000928633	0.000832142	0.00160759	0.000616619	0.00248907	0.00156008	0.00172204	0.00143703	0.00271715	0.00100182	0.00286752	0.00222829	0.00590498	0.00203365	0.00129144	0.00115516	0.00233715	0.000758288
-467	0.00402518	0.00215091	0.0022348	0.00171099	0.00378159	0.00124108	0.00358559	0.0025382	0.00716893	0.00231148	0.00163426	0.001445	0.00296943	0.000890727	0.000726186	0.000886975	0.00113821	0.00113898	0.00155028	0.000752396	0.00211846	0.00186751	0.00458291	0.00173195	0.000923581	0.000831393	0.00156599	0.00061298	0.00237569	0.00151894	0.0016865	0.00142498	0.00266594	0.000996739	0.00285202	0.00220285	0.00587592	0.00202172	0.00127892	0.0011382	0.00226771	0.000751853
-466	0.00375121	0.00208084	0.00216222	0.00168917	0.00370376	0.00123662	0.00355845	0.00250849	0.00712512	0.00229669	0.00161598	0.00140926	0.00288319	0.000881832	0.000735189	0.000860637	0.00113789	0.00113673	0.00153721	0.00075216	0.00211718	0.00185353	0.00458628	0.00172614	0.00091935	0.000829646	0.00153139	0.000609438	0.0022432	0.00147074	0.00165006	0.00141295	0.00262048	0.000994388	0.00283782	0.00218101	0.0058557	0.00201142	0.00126767	0.00111945	0.00220729	0.000745635
-465	0.00345535	0.00201602	0.00209916	0.00166841	0.00364248	0.00123651	0.00354336	0.00248708	0.00712215	0.00228682	0.0015961	0.00137409	0.00281584	0.00087608	0.000747646	0.000837059	0.00113702	0.00113509	0.00153642	0.000753359	0.00211709	0.00184346	0.00459125	0.00172259	0.000912793	0.000827212	0.0015053	0.000607687	0.0021015	0.00142654	0.00161809	0.00140175	0.00258945	0.000994934	0.00283023	0.00216527	0.0058567	0.00200471	0.00125445	0.00110065	0.00216057	0.000741884
-464	0.00317343	0.00196023	0.00205358	0.00165075	0.00360542	0.0012408	0.00354189	0.00247515	0.00715935	0.0022847	0.00157576	0.00133763	0.00276935	0.000873299	0.00076729	0.000817277	0.00113585	0.00113406	0.00155149	0.000755866	0.00211934	0.00183769	0.00459981	0.00172275	0.000904464	0.000825253	0.00148609	0.000606664	0.00197036	0.00138875	0.00159471	0.00139241	0.00257845	0.000998335	0.00283061	0.00215642	0.00587958	0.00200373	0.00124011	0.00108144	0.00212772	0.000739981
-463	0.00298305	0.00191786	0.00202821	0.00163504	0.00358698	0.00124906	0.003547	0.00247152	0.00720998	0.00229052	0.0015605	0.00130199	0.00273415	0.000872502	0.000770234	0.000803656	0.00113062	0.0011335	0.00156907	0.000760149	0.00212476	0.00183565	0.00461058	0.00172594	0.00089959	0.000823999	0.00147174	0.000605782	0.00187664	0.00136076	0.00157941	0.00138427	0.00257803	0.00100461	0.00283588	0.00215358	0.00591028	0.00200823	0.00123004	0.00106299	0.00210295	0.000739142
-462	0.00287655	0.00188676	0.00201624	0.001621	0.00358474	0.00125921	0.00355451	0.00247363	0.00727168	0.00229951	0.00155491	0.00127132	0.00270195	0.000872587	0.000752747	0.000794605	0.00112176	0.00113318	0.00158695	0.000764352	0.00213008	0.00183638	0.00461822	0.00172979	0.000901148	0.000822919	0.00145988	0.000605176	0.00181465	0.00134068	0.001569	0.00137709	0.00258584	0.00101178	0.00284229	0.002155	0.00594495	0.00201465	0.00122803	0.00104712	0.00208092	0.000738881
-461	0.00278753	0.00186476	0.00201519	0.00160806	0.00358332	0.00126998	0.00356699	0.00248355	0.0073333	0.00231054	0.00155446	0.0012461	0.00267491	0.000874878	0.000736818	0.00078886	0.00111228	0.00113295	0.00160164	0.000768377	0.00213411	0.00184102	0.00461146	0.00173346	0.000905546	0.000821675	0.00145024	0.000605699	0.00176218	0.00132681	0.00156373	0.0013705	0.00259248	0.00101918	0.00285055	0.00216229	0.00597238	0.002022	0.00123	0.00103389	0.00206257	0.000740289
-460	0.00272596	0.00186447	0.00203416	0.00159791	0.00356795	0.00128162	0.00358669	0.00250173	0.00739151	0.00232615	0.00155808	0.00122752	0.00266195	0.00087972	0.000725558	0.000790486	0.0011028	0.0011328	0.00160643	0.000772811	0.00213327	0.00185004	0.00458797	0.00173877	0.000908632	0.000819724	0.00144542	0.000607316	0.00172576	0.00132748	0.00156848	0.00136536	0.00258719	0.00102722	0.00285998	0.00217588	0.00598974	0.00203246	0.00123335	0.00102362	0.00205368	0.000743518
-459	0.00270392	0.00188461	0.00207059	0.00159562	0.00355719	0.00129537	0.00360628	0.00252705	0.00744835	0.00234912	0.00156479	0.00121691	0.00265519	0.000885475	0.000723646	0.000801017	0.00109411	0.00113462	0.00161398	0.000778117	0.00212661	0.00186263	0.00455631	0.00174779	0.000909633	0.000819744	0.0014436	0.000608948	0.00171378	0.00134281	0.00158235	0.00136512	0.00258559	0.00103674	0.00286645	0.00219484	0.00600233	0.00204845	0.00123721	0.00101833	0.00204939	0.000747211
-458	0.00271775	0.00191156	0.00211194	0.00159763	0.00356061	0.00130998	0.0036229	0.00255662	0.0075048	0.00237874	0.00157271	0.00121342	0.00265307	0.000891752	0.000733314	0.000816038	0.0010872	0.00113863	0.00162407	0.000783918	0.00211948	0.00187698	0.0045218	0.00175939	0.000907755	0.000822586	0.00144555	0.000610552	0.00172553	0.0013638	0.00159957	0.00136813	0.00259234	0.00104695	0.00287119	0.0022168	0.0060133	0.00206906	0.00124023	0.001018	0.00204931	0.000751152
-457	0.00275955	0.00195322	0.00215661	0.00160115	0.00356396	0.00132278	0.00364434	0.00258536	0.00755958	0.00241058	0.00158291	0.0012135	0.00266206	0.000898996	0.000750241	0.000836245	0.00108337	0.00114375	0.00162941	0.000788175	0.00211443	0.00189063	0.00448372	0.00177139	0.000900397	0.000826198	0.00145012	0.000613086	0.0017549	0.00139473	0.00161999	0.00137245	0.00259668	0.00105548	0.00287939	0.002238	0.00602165	0.00209099	0.00124165	0.00101985	0.00205609	0.000756041
-456	0.00283231	0.0020136	0.00221112	0.00160795	0.00356757	0.00133034	0.00366714	0.00260996	0.00761207	0.00243904	0.00159684	0.00121476	0.00267525	0.000905532	0.000769939	0.00086241	0.00108015	0.00114793	0.00163012	0.000789183	0.0021089	0.00190241	0.00444385	0.00178115	0.000890033	0.000829752	0.00145426	0.00061553	0.00180113	0.001438	0.00164564	0.00137794	0.00259885	0.00105976	0.00288802	0.00225618	0.00602796	0.00211009	0.00124344	0.00102226	0.00206475	0.000760531
-455	0.00294539	0.00207902	0.00227365	0.00161539	0.00357852	0.00132671	0.00367488	0.00262905	0.00761709	0.00246173	0.0016117	0.00121611	0.00267956	0.000909921	0.000792733	0.00088879	0.00107112	0.00114996	0.0016218	0.000785996	0.00210202	0.00191077	0.00440347	0.00178679	0.000880453	0.000833326	0.00145638	0.000616527	0.00186906	0.0014839	0.00167238	0.00138267	0.00260016	0.00105635	0.00288845	0.00226991	0.00601028	0.00212426	0.00124608	0.00102472	0.00206797	0.000763224
-454	0.00306754	0.00214752	0.00233701	0.00162407	0.00359447	0.0013145	0.00366088	0.00264283	0.00756291	0.00247821	0.00162444	0.00121982	0.0026705	0.000912846	0.000811244	0.000912492	0.00105578	0.00115032	0.00160345	0.000780048	0.00209054	0.00191627	0.00436008	0.00178851	0.000870476	0.000836813	0.00145454	0.000617033	0.00193939	0.00153001	0.0016964	0.0013872	0.00259896	0.00104727	0.00287571	0.00227955	0.00596149	0.00213336	0.00124746	0.00102831	0.00206252	0.00076494
-453	0.00317596	0.00221911	0.00240361	0.00163719	0.00362626	0.00129869	0.00363159	0.00264914	0.00748579	0.00248693	0.00163209	0.00122441	0.00264953	0.00091425	0.000822811	0.00093091	0.00103831	0.00115036	0.00158885	0.000772664	0.00207261	0.00191844	0.00431247	0.00178718	0.000857586	0.000839537	0.00144589	0.000617394	0.00199939	0.00157501	0.00172096	0.00139377	0.00260755	0.00103568	0.0028521	0.00228379	0.00589913	0.00213706	0.00124484	0.00103197	0.00204771	0.000765822
-452	0.00329118	0.0022927	0.00247728	0.00165253	0.00367774	0.00127884	0.00359672	0.00264905	0.00739254	0.00248945	0.00163317	0.00122695	0.0026267	0.000914153	0.000833197	0.000947063	0.0010225	0.00115016	0.00158218	0.000763367	0.00205428	0.00191706	0.00426837	0.00178339	0.000841383	0.000841645	0.00143587	0.000617393	0.00206219	0.00161988	0.00174989	0.00140134	0.00262996	0.0010211	0.0028255	0.00228306	0.00583046	0.00213642	0.00123727	0.0010343	0.00203129	0.000765773
-451	0.00340745	0.00237038	0.00253489	0.00166942	0.00373681	0.00125729	0.00356158	0.00264261	0.00730227	0.00248749	0.0016343	0.00122767	0.00260835	0.000911576	0.00084614	0.000962476	0.00101163	0.00114816	0.00157978	0.000752922	0.00203766	0.00191272	0.00423847	0.00177853	0.000826044	0.000843392	0.00142766	0.000616489	0.00212679	0.00166643	0.00177326	0.00140879	0.00265829	0.0010051	0.00279962	0.00227767	0.00577037	0.00213301	0.00123017	0.00103553	0.002018	0.000764033
-450	0.0035133	0.00244458	0.00257364	0.00168748	0.00381153	0.00123674	0.00352923	0.00263139	0.00722742	0.00248245	0.00163758	0.00122788	0.00259195	0.000907617	0.000856593	0.00097311	0.00100608	0.00114535	0.00158776	0.000742604	0.00202662	0.00190548	0.00422855	0.00177268	0.000815724	0.000845412	0.00142128	0.000615049	0.00218495	0.00170885	0.00178986	0.00141642	0.00269964	0.000989674	0.00277792	0.00226844	0.00572798	0.00212757	0.00122665	0.00103665	0.00200662	0.000761333
-449	0.00359853	0.00250487	0.00261093	0.00170192	0.00389717	0.00121801	0.00350908	0.00261835	0.00718031	0.00247373	0.00164408	0.00122751	0.00258779	0.000905036	0.00085759	0.000977297	0.0010047	0.00114132	0.00160147	0.000733528	0.00202464	0.00189649	0.0042368	0.00176484	0.000810885	0.000846842	0.00142221	0.000614648	0.00222806	0.00174109	0.00180782	0.00142162	0.00274932	0.000975767	0.00276686	0.00225742	0.00570855	0.00211929	0.00122748	0.00103718	0.002005	0.000759842
-448	0.00365572	0.00254679	0.00265287	0.00171236	0.00396928	0.00120144	0.00350324	0.00260593	0.00716733	0.00246024	0.00165193	0.00122587	0.00259652	0.000903118	0.000847551	0.000976332	0.00100575	0.00113497	0.00161385	0.000725819	0.00202708	0.0018884	0.00426002	0.00175534	0.000810183	0.000846852	0.00142883	0.00061465	0.00225163	0.00176156	0.00182931	0.00142366	0.00279156	0.000963629	0.00276516	0.00224717	0.00571367	0.00210779	0.00123106	0.00103636	0.00201268	0.000758884
-447	0.00370289	0.00256938	0.0026971	0.00172131	0.00403482	0.00118704	0.0035009	0.00259921	0.00718278	0.00244821	0.00165168	0.00122669	0.00260538	0.000901554	0.000835462	0.000971847	0.00100617	0.00112692	0.00162938	0.000719427	0.00203105	0.00188236	0.00429408	0.00174625	0.000814376	0.000847914	0.00143736	0.000614132	0.00226918	0.00177061	0.00185163	0.00142412	0.0028321	0.000953232	0.00276598	0.00224079	0.00573843	0.00209723	0.00123303	0.0010373	0.00202137	0.000757843
-446	0.00374504	0.0025713	0.00273805	0.00172618	0.00412295	0.00117765	0.00350816	0.00259824	0.00723079	0.00244218	0.00164693	0.00123068	0.0026209	0.000901275	0.000822844	0.000962392	0.00100868	0.00111849	0.0016528	0.000715358	0.00203713	0.00187748	0.00433348	0.00173979	0.000821865	0.000850703	0.00144873	0.000613708	0.00228394	0.00176685	0.00187336	0.00142234	0.00288787	0.000946502	0.00277265	0.00223786	0.00578213	0.00209099	0.0012344	0.00104069	0.00203481	0.000757492
-445	0.00376318	0.00256845	0.00277306	0.00173292	0.00421139	0.00118271	0.00353172	0.00259992	0.00731361	0.0024407	0.00164653	0.00123535	0.00265221	0.000902545	0.0008076	0.000947172	0.0010206	0.00111026	0.00168464	0.000712334	0.00204253	0.00187347	0.00437278	0.00173615	0.000829896	0.000853412	0.00146381	0.000614216	0.00228539	0.00175781	0.00189683	0.00142159	0.00294801	0.000947523	0.00278713	0.00223669	0.00584319	0.00208843	0.00123821	0.00104438	0.00205801	0.000758381
-444	0.00376738	0.00256059	0.00280273	0.00174414	0.00427959	0.00120218	0.00356592	0.00260153	0.0074223	0.00244076	0.00165049	0.00123875	0.00269201	0.000905005	0.000795867	0.000925997	0.00104137	0.00110184	0.00171958	0.000708154	0.00204978	0.00186848	0.00441209	0.0017336	0.000840103	0.000854832	0.00148125	0.00061545	0.00228162	0.0017433	0.00192205	0.00142299	0.00299958	0.000955168	0.00280785	0.002235	0.0059172	0.00208718	0.0012453	0.00104679	0.00208663	0.000760228
-443	0.00377399	0.00253361	0.00282256	0.0017506	0.00432498	0.00122914	0.00360945	0.00260615	0.00754354	0.00244218	0.0016576	0.00124273	0.00274305	0.000908537	0.000785918	0.000904421	0.00106444	0.00109297	0.0017449	0.000705244	0.00206094	0.0018649	0.00445475	0.00173146	0.000852291	0.000856305	0.00150458	0.000616803	0.00227996	0.00171902	0.0019435	0.00142179	0.00303494	0.00096719	0.0028352	0.00223552	0.00599915	0.00208682	0.00125495	0.00104952	0.00212382	0.00076267
-442	0.00373864	0.0024934	0.00282288	0.00175458	0.00434646	0.00126461	0.00365526	0.00262064	0.007673	0.00245167	0.00166699	0.00125044	0.00279941	0.000916012	0.000775174	0.000881214	0.00108649	0.00108506	0.00175921	0.000707	0.00207157	0.00186518	0.00449606	0.00173173	0.000865209	0.000859366	0.00152969	0.000619215	0.0022569	0.00168731	0.00195468	0.00141982	0.00305284	0.000985807	0.00286341	0.00224291	0.00608453	0.0020917	0.0012661	0.00105491	0.00216455	0.000767613
-441	0.00366087	0.00243995	0.00281852	0.00175611	0.00435657	0.00130605	0.00369729	0.00264783	0.00780115	0.00247079	0.00167561	0.00126136	0.00285446	0.000928924	0.000758063	0.000855722	0.00110528	0.00108095	0.00176849	0.000712252	0.00208077	0.00186835	0.00453051	0.00173414	0.000876536	0.000863372	0.00155317	0.000623498	0.00220947	0.00164783	0.0019619	0.00141853	0.00306253	0.00100915	0.00288903	0.00225809	0.00616583	0.00210247	0.00127607	0.00106237	0.00220382	0.000776211
-440	0.00354366	0.00238093	0.00280402	0.0017551	0.00435534	0.00134967	0.00373167	0.00268501	0.00791786	0.00249485	0.00168307	0.00127318	0.00291377	0.000945145	0.000734175	0.000831939	0.0011197	0.00107933	0.00176948	0.000718704	0.00208649	0.00187584	0.00455256	0.00173815	0.000884089	0.000867609	0.00157777	0.000629358	0.00213892	0.00160644	0.00196186	0.00141721	0.00306241	0.00103418	0.00290908	0.00228043	0.00623521	0.0021165	0.00128358	0.0010704	0.00224577	0.000787252
-439	0.00339484	0.00234365	0.00276773	0.00176219	0.00434066	0.00139593	0.00375184	0.00272613	0.00800984	0.00252212	0.00168534	0.00128574	0.00297163	0.000961972	0.00071198	0.000807989	0.00113002	0.00107993	0.00176379	0.000725524	0.00208625	0.00188649	0.00456228	0.00174451	0.000886733	0.000872799	0.00159965	0.0006357	0.00205341	0.00157582	0.00194887	0.00142106	0.00305223	0.00106073	0.00291905	0.00230631	0.00628606	0.00213331	0.00128604	0.00107927	0.00228564	0.000798836
-438	0.00324911	0.00234022	0.00271948	0.00177994	0.00431807	0.00144771	0.00375325	0.00276667	0.00806072	0.00255309	0.00168214	0.00129844	0.00302146	0.000978765	0.000694181	0.000788233	0.00113763	0.00108368	0.00175341	0.00073277	0.0020815	0.00189564	0.00455786	0.00175354	0.000886921	0.000878402	0.00161658	0.000642575	0.00197164	0.00156422	0.00192855	0.00143181	0.00303574	0.00109024	0.00291738	0.00233116	0.00630929	0.00215331	0.00128453	0.00108842	0.00231902	0.00081067
-437	0.00310652	0.00235429	0.00266658	0.00179921	0.00428221	0.00150376	0.00374575	0.00280381	0.00807531	0.00258481	0.00168418	0.00130834	0.00306741	0.000995726	0.000677865	0.000772412	0.00114622	0.00108933	0.00173473	0.000740286	0.00207541	0.00190206	0.00454218	0.00176346	0.000887305	0.000882111	0.0016307	0.000650438	0.00189219	0.00156335	0.0019064	0.00144427	0.00300847	0.00112202	0.00291058	0.00235294	0.00630874	0.00217413	0.00128574	0.00109523	0.00234905	0.000823082
-436	0.00296095	0.00237964	0.00260735	0.00181999	0.00420647	0.00155891	0.00371982	0.00283948	0.00804502	0.00261463	0.00168493	0.00131706	0.00309702	0.0010121	0.000664924	0.000753817	0.00115401	0.00109614	0.00170785	0.000748027	0.00206993	0.0019085	0.00452335	0.00177218	0.000887214	0.000884942	0.00163967	0.000658438	0.00181294	0.00156673	0.00188068	0.00145807	0.00295716	0.00115347	0.00289488	0.00237399	0.00628419	0.0021934	0.00128607	0.001101	0.00236834	0.000835268
-435	0.00282099	0.00240521	0.00253326	0.00183406	0.00411344	0.00160028	0.00367758	0.00287643	0.00799094	0.0026441	0.00167858	0.00132803	0.00310306	0.00102737	0.000653126	0.000742168	0.00115551	0.00110566	0.00168067	0.00075988	0.00206791	0.00191633	0.0045068	0.00178061	0.000887327	0.000889604	0.00164126	0.000666017	0.00173706	0.00157369	0.00184439	0.00146986	0.00289705	0.00118008	0.00287274	0.00239638	0.00624887	0.00221235	0.00128295	0.00110882	0.00237216	0.000846694
-434	0.00269924	0.0024191	0.00245418	0.00183262	0.00403645	0.0016233	0.0036392	0.00291844	0.00794332	0.00267653	0.00167248	0.00134244	0.00310462	0.00104212	0.000640892	0.0007424	0.00115239	0.00111711	0.00165408	0.000778036	0.00206809	0.00192652	0.00449359	0.00178974	0.000887637	0.000896819	0.00164176	0.000673082	0.00167007	0.00158075	0.00180328	0.00147487	0.00284526	0.00120067	0.00285365	0.00242248	0.00621846	0.00223314	0.00128006	0.00111963	0.00237319	0.000857602
-433	0.00258604	0.00243754	0.00238117	0.0018285	0.00398831	0.00163724	0.00360669	0.00296771	0.00790409	0.00271721	0.00166956	0.0013589	0.00310265	0.00105703	0.000630327	0.000744941	0.00115029	0.00112895	0.00163317	0.000796984	0.00207024	0.0019355	0.0044862	0.00179919	0.000888266	0.000905039	0.00164067	0.000679731	0.00160818	0.00159124	0.00176573	0.00147872	0.00281074	0.00121711	0.00283846	0.0024516	0.00619514	0.0022582	0.00127891	0.00113197	0.00237166	0.000868379
-432	0.00250482	0.00245809	0.00232105	0.00182386	0.00397967	0.00164163	0.00357951	0.00300957	0.00786717	0.00275389	0.00166641	0.001372	0.00309986	0.001067	0.000623168	0.00074747	0.00114909	0.0011397	0.0016253	0.000810993	0.002076	0.0019406	0.00448721	0.00180687	0.00088863	0.000911608	0.00164105	0.000684645	0.001564	0.00160278	0.00173507	0.00148178	0.00280248	0.00122631	0.00282776	0.00247509	0.00617719	0.00228038	0.00127752	0.0011418	0.00237046	0.000875821
-431	0.0024929	0.00247666	0.0022969	0.00181607	0.00400228	0.00163541	0.0035557	0.00303365	0.00782722	0.00277684	0.00166111	0.00137921	0.00310218	0.00106946	0.000621453	0.00074869	0.00114216	0.00114641	0.00162795	0.000819543	0.00208432	0.00194321	0.00449546	0.00181165	0.000889678	0.000915657	0.00164736	0.000687126	0.00155718	0.00161267	0.00171953	0.00148124	0.00281511	0.00122748	0.00282001	0.00248843	0.00616134	0.00229424	0.00127539	0.00114743	0.00237477	0.000878294
-430	0.00256283	0.0024897	0.00231945	0.00180618	0.0040404	0.00162421	0.00353935	0.00304628	0.00778543	0.00279271	0.0016523	0.00138265	0.00309899	0.00106788	0.00062938	0.000746433	0.00113086	0.00114992	0.00163866	0.000825587	0.00209596	0.00194195	0.0045114	0.00181372	0.000890948	0.000917113	0.00165128	0.000687749	0.0015961	0.00161807	0.00172516	0.00147805	0.00283953	0.0012249	0.00281766	0.00249411	0.00614841	0.00230321	0.00127162	0.00114988	0.00237513	0.000877816
-429	0.00266687	0.00247322	0.00236496	0.00178572	0.0040905	0.00160702	0.00353232	0.0030543	0.00774153	0.00280536	0.00164338	0.00138271	0.00308655	0.00106399	0.000640457	0.00074805	0.00112133	0.0011508	0.00165578	0.000829758	0.00211018	0.00193755	0.00453104	0.00181274	0.000893213	0.000915764	0.00164976	0.0006866	0.00165367	0.00161063	0.00174314	0.00146826	0.00287314	0.00121839	0.00282125	0.00249592	0.00613628	0.00230905	0.0012683	0.00114924	0.00236816	0.000875294
-428	0.00277762	0.00242209	0.00241786	0.00175161	0.0041544	0.0015773	0.00353212	0.00305941	0.00771277	0.00281405	0.00163717	0.00137985	0.00307243	0.0010587	0.000652282	0.000749766	0.00111325	0.0011486	0.00168169	0.000832385	0.00212602	0.00193231	0.00455551	0.00180735	0.000895772	0.000913039	0.00164775	0.00068379	0.00171495	0.00158593	0.00176555	0.0014501	0.00291804	0.00120484	0.00282907	0.00249586	0.00613414	0.0023107	0.00126647	0.00114645	0.00236009	0.000871245
-427	0.00289252	0.00236252	0.00247816	0.00171392	0.00423629	0.0015378	0.00353297	0.00305943	0.00772317	0.00281548	0.00162955	0.00137576	0.00306208	0.00105135	0.000664332	0.000748964	0.00110395	0.00114493	0.00171767	0.000833813	0.00214104	0.00192814	0.00458188	0.00179908	0.000896184	0.000910715	0.00164605	0.0006793	0.00177842	0.00155574	0.00179106	0.00142942	0.00297698	0.00118581	0.002837	0.00249379	0.00615252	0.00230728	0.00126287	0.00114324	0.00235406	0.000865327
-426	0.00300954	0.00229653	0.00254316	0.00167412	0.00433504	0.00149345	0.00354394	0.00305461	0.0077741	0.00281223	0.00162553	0.00136846	0.00306495	0.0010425	0.000672815	0.000756711	0.00109318	0.00114044	0.00175655	0.000832299	0.00215462	0.00192376	0.0046065	0.00179098	0.000896738	0.000907655	0.00164718	0.000674255	0.00184118	0.00152662	0.00181817	0.00140728	0.00304579	0.00116287	0.00284928	0.00248918	0.0061903	0.0023016	0.00126113	0.00113806	0.00235606	0.000858377
-425	0.00312748	0.00221676	0.00261666	0.00163642	0.00442569	0.0014501	0.00356339	0.0030464	0.00784086	0.00280615	0.00162785	0.00135664	0.00308101	0.0010329	0.000683265	0.000761951	0.00108337	0.00113342	0.00178447	0.000825	0.00216573	0.0019171	0.00463171	0.00178158	0.000898994	0.000901812	0.00165137	0.000668711	0.00190537	0.00148935	0.00185002	0.00138492	0.00310508	0.00113755	0.00286456	0.00248175	0.00623628	0.00229386	0.00126342	0.00112923	0.00236619	0.000850803
-424	0.00323182	0.00214184	0.0027031	0.00160912	0.00449057	0.0014125	0.00357373	0.00303189	0.00789976	0.00279432	0.00162737	0.0013417	0.00309939	0.00102148	0.000691005	0.00075862	0.00107178	0.0011254	0.00180458	0.000812242	0.00217299	0.00190764	0.00465282	0.0017702	0.000901116	0.000894017	0.00165452	0.000662252	0.00196141	0.00145023	0.00188744	0.00136726	0.00314758	0.00111237	0.00287336	0.00246976	0.00627629	0.00228226	0.00126424	0.00111786	0.00237696	0.000841867
-423	0.003342	0.00207334	0.00280138	0.00158702	0.00452098	0.00137671	0.00357144	0.00300515	0.00793892	0.0027715	0.00161841	0.00132469	0.0031178	0.00100873	0.000697015	0.000755786	0.00105594	0.00111798	0.00182122	0.000797551	0.00217635	0.00189941	0.0046615	0.00175979	0.00090133	0.000885825	0.00165652	0.000656052	0.00201951	0.00141456	0.00192866	0.0013525	0.0031711	0.00108713	0.00287389	0.00245228	0.00630021	0.00226564	0.00125987	0.00110526	0.00238716	0.000832389
-422	0.00346111	0.00201786	0.0029068	0.00156915	0.00450499	0.00134495	0.00356372	0.00297689	0.0079755	0.00274566	0.00160871	0.00130854	0.00313453	0.000997734	0.000698818	0.000758102	0.00103665	0.00111067	0.00182537	0.000784674	0.00217692	0.00189453	0.00465852	0.00175162	0.000901671	0.00087835	0.00165452	0.00065074	0.00207996	0.00138798	0.00197172	0.00133991	0.00316518	0.00106481	0.00287032	0.00243571	0.00631701	0.00224864	0.00125519	0.00109344	0.00239452	0.000824237
-421	0.00352913	0.00198308	0.00297057	0.00155932	0.0044509	0.00132109	0.00355698	0.00295894	0.0080232	0.00272681	0.00160118	0.00129754	0.00314327	0.000990787	0.000701203	0.000767295	0.00102684	0.0011051	0.00181683	0.00077577	0.00217662	0.00189085	0.00464751	0.00174586	0.000901493	0.000873135	0.00164577	0.000646164	0.00211517	0.00137519	0.0019987	0.00133221	0.00313387	0.00104843	0.0028668	0.00242489	0.00633536	0.00223633	0.00125134	0.00108534	0.00239452	0.000818476
-420	0.00351936	0.00196594	0.00297598	0.00155488	0.00437766	0.0012987	0.00354559	0.00294364	0.00807685	0.00271036	0.00159456	0.00129189	0.00314655	0.000985153	0.000702286	0.000782499	0.00102787	0.00110115	0.00179917	0.000768013	0.00217222	0.00188707	0.00463081	0.00174175	0.000900396	0.000871398	0.00163547	0.000641607	0.00211082	0.00137422	0.00200192	0.00132802	0.00308841	0.00103336	0.00285891	0.00241535	0.00635383	0.00222606	0.00124748	0.00108164	0.00239101	0.00081338
-419	0.00350543	0.00196465	0.0029683	0.00155379	0.00428708	0.00127635	0.00352972	0.00292646	0.00813221	0.0026925	0.00158935	0.00128997	0.00315116	0.000980244	0.000704517	0.000795957	0.00102804	0.00109719	0.0017725	0.00075995	0.00216327	0.00188268	0.0046103	0.00173864	0.000898701	0.00087224	0.00162774	0.000637736	0.00210497	0.0013803	0.00199817	0.00132549	0.00302979	0.00101815	0.00284649	0.00240457	0.00637126	0.00221557	0.00124402	0.0010811	0.00238945	0.00080899
-418	0.00349577	0.00197453	0.00296038	0.0015567	0.00418721	0.00125907	0.00351558	0.00291012	0.00817891	0.00267337	0.00158517	0.00129291	0.00315186	0.000977873	0.000706473	0.000807174	0.00102762	0.00109314	0.00173909	0.000751898	0.00215287	0.00187926	0.00458917	0.00173748	0.000897077	0.000874917	0.00161747	0.000635597	0.00210112	0.00139085	0.001994	0.00132492	0.00296315	0.00100548	0.00283422	0.00239469	0.00638404	0.00220542	0.00124112	0.00108391	0.00238466	0.000806735
-417	0.00348709	0.00198464	0.00295198	0.00156297	0.00408401	0.00124648	0.00350428	0.00289829	0.00818076	0.00265722	0.00158249	0.00130035	0.00313703	0.000978554	0.000705875	0.000818771	0.00102863	0.00108874	0.00170028	0.000745088	0.00214301	0.00187669	0.00457889	0.00173835	0.000896983	0.000879257	0.00160161	0.000635053	0.00209648	0.00140171	0.00199031	0.00132586	0.00289214	0.000995786	0.00282364	0.00238749	0.00637983	0.00219779	0.00123974	0.00108981	0.00236932	0.000806803
-416	0.00349521	0.00199739	0.00295237	0.0015744	0.00397809	0.0012393	0.00349097	0.00289042	0.00814517	0.00264427	0.00158021	0.00131169	0.00311039	0.00098172	0.000706483	0.000826928	0.00103239	0.00108518	0.00165757	0.000742041	0.00213308	0.00187588	0.00457741	0.00174074	0.000897665	0.000885309	0.0015825	0.000635459	0.00210084	0.00141216	0.00199238	0.00132979	0.00281783	0.000990669	0.00281202	0.00238315	0.00636129	0.00219251	0.00123894	0.0010985	0.00234645	0.000808589
-415	0.00351534	0.00202288	0.0029674	0.00158935	0.00388598	0.00123796	0.00347826	0.00288511	0.00811479	0.00263298	0.00157636	0.00132619	0.00308436	0.000987099	0.000703674	0.000836994	0.00103898	0.00108352	0.00162109	0.000743025	0.00212423	0.00187868	0.00457633	0.00174589	0.000897467	0.00089348	0.00156294	0.000637233	0.00210951	0.00142994	0.00200319	0.00133643	0.00275354	0.000990494	0.00280124	0.00238189	0.00634556	0.00218944	0.00123691	0.00110983	0.00232365	0.000812166
-414	0.00352866	0.00205614	0.00296837	0.00160416	0.00381447	0.00123976	0.00347925	0.0028818	0.00812074	0.00262416	0.00157505	0.00134244	0.00306235	0.000994786	0.000703535	0.000851172	0.00105256	0.00108303	0.00159251	0.000746344	0.00211988	0.00188549	0.00458225	0.00175361	0.000896803	0.000902628	0.00154323	0.000640645	0.0021161	0.00145366	0.00201047	0.0013436	0.00270349	0.000993052	0.00279956	0.00238365	0.0063515	0.00218889	0.00123593	0.00112253	0.00230279	0.000817716
-413	0.00351147	0.00209225	0.00294135	0.00161811	0.00376145	0.00124301	0.00349721	0.0028821	0.00819016	0.00261734	0.00158255	0.00135784	0.00305013	0.00100281	0.000703209	0.000863642	0.00107374	0.00108228	0.00156615	0.000750492	0.00212116	0.00189372	0.004598	0.00176109	0.000899023	0.000911022	0.00152606	0.000644368	0.00210734	0.00147795	0.00200755	0.0013502	0.0026638	0.000996749	0.00280918	0.00238791	0.00639408	0.00218922	0.00124079	0.00113443	0.0022881	0.000823586
-412	0.00347277	0.00211379	0.00289689	0.00162618	0.00372789	0.00124385	0.00352293	0.00288741	0.00828128	0.00261293	0.0015937	0.00137211	0.00303965	0.00101128	0.000708715	0.000868498	0.00110193	0.00108205	0.00154484	0.000753891	0.00212631	0.00190094	0.00462109	0.00176741	0.000903892	0.000918505	0.00151206	0.000648927	0.00209074	0.00149114	0.00199941	0.00135411	0.00263636	0.00099887	0.00282462	0.00239418	0.00645118	0.00219017	0.0012488	0.00114531	0.00227585	0.000830102
-411	0.00344996	0.00211099	0.00286709	0.00162563	0.00370982	0.00123942	0.00355182	0.00289222	0.008361	0.00260892	0.00160625	0.00138439	0.0030333	0.00101891	0.000718647	0.000865645	0.00112808	0.00108273	0.00152983	0.000755293	0.00213277	0.00190724	0.00464744	0.001773	0.000910814	0.000925147	0.00150184	0.000654542	0.0020843	0.00148832	0.00199758	0.00135418	0.00261983	0.000997359	0.00284229	0.00239973	0.00650422	0.00219096	0.00125853	0.00115477	0.00226757	0.000836727
-410	0.00346276	0.00209202	0.00286412	0.0016199	0.00370718	0.00123505	0.00358979	0.00289989	0.00844527	0.00260723	0.00162429	0.00139341	0.00303635	0.00102612	0.000728115	0.000858411	0.00114817	0.00108352	0.00151778	0.000756921	0.00214498	0.00191444	0.00467548	0.00177856	0.000921481	0.000930107	0.00149605	0.000661095	0.00209544	0.00147522	0.00200614	0.00135171	0.00261248	0.000995986	0.00286738	0.00240717	0.00656037	0.00219289	0.00127289	0.00116176	0.0022662	0.000843607
-409	0.00346393	0.00207321	0.00286237	0.00161562	0.00372316	0.00123354	0.00363495	0.00291286	0.00854456	0.00261022	0.0016454	0.00140018	0.00303945	0.00103323	0.000729966	0.000853176	0.0011693	0.00108598	0.00150611	0.000759913	0.00216563	0.00192333	0.00470917	0.00178451	0.000935282	0.000933806	0.00149143	0.000667778	0.00209695	0.00146319	0.00201584	0.0013508	0.00261463	0.000996727	0.00290029	0.00241809	0.00662686	0.00219737	0.00129034	0.00116699	0.00226544	0.000850503
-408	0.0034566	0.00205779	0.00285749	0.00161564	0.00374626	0.00123134	0.00368321	0.00292566	0.00865611	0.00261626	0.00166474	0.00140264	0.00304507	0.00103717	0.000731304	0.000847971	0.00118954	0.00109078	0.00149071	0.000762005	0.00219069	0.0019332	0.00474291	0.00179147	0.000948724	0.000936296	0.00149073	0.000673366	0.00209395	0.00145288	0.00202352	0.00135321	0.00261848	0.000996674	0.00293695	0.00242943	0.00669951	0.00220387	0.00130673	0.00116947	0.0022679	0.000855267
-407	0.00344463	0.00204455	0.00283692	0.00161649	0.00375781	0.00122635	0.00373538	0.00293767	0.00878925	0.00262465	0.00168241	0.00140159	0.0030662	0.0010388	0.000737489	0.000840377	0.00120584	0.00109742	0.00147289	0.000761438	0.00221612	0.00194266	0.00476229	0.00179701	0.000960657	0.000937223	0.00149746	0.00067851	0.00209106	0.00144246	0.00202138	0.00135695	0.00261535	0.000993892	0.00297575	0.00244017	0.00677577	0.00221083	0.00132153	0.00116941	0.00228183	0.000858653
-406	0.00339959	0.00203957	0.00279138	0.00161684	0.00376207	0.00121948	0.00378875	0.00294967	0.00892489	0.00263532	0.00169733	0.00139981	0.00309359	0.00103921	0.000743122	0.000830726	0.00121802	0.00110379	0.00145649	0.00075766	0.00223866	0.00194958	0.00476688	0.00179937	0.000970337	0.00093713	0.00150887	0.000682967	0.00207136	0.00143515	0.0020047	0.00136032	0.00260928	0.00098857	0.0030137	0.00244963	0.00684589	0.00221734	0.00133383	0.00116847	0.00230123	0.000861087
-405	0.00331983	0.0020436	0.00272226	0.00161684	0.00376858	0.00121203	0.00383776	0.00296135	0.00902761	0.0026476	0.0017107	0.00139655	0.0031164	0.00103844	0.000748304	0.000820173	0.00122652	0.00110798	0.00144012	0.000751588	0.00225789	0.00195433	0.00476313	0.0017996	0.000978136	0.000935687	0.00152416	0.000685822	0.00203407	0.00143189	0.00197439	0.00136241	0.00260435	0.000981808	0.00304783	0.00245784	0.00689537	0.0022236	0.00134442	0.00116612	0.00232028	0.000862129
-404	0.00324238	0.00204439	0.00266133	0.00161591	0.0037847	0.00120133	0.00387017	0.00297548	0.00906895	0.00266419	0.00172304	0.00138999	0.00312927	0.00103774	0.00074994	0.000809456	0.00122654	0.0011106	0.00142503	0.000742443	0.00227309	0.00195784	0.00474831	0.00179921	0.000985947	0.000932297	0.00154227	0.00068749	0.00199616	0.00142692	0.00194394	0.00136325	0.00260486	0.000971887	0.00307163	0.00246666	0.00690863	0.0022317	0.00135449	0.00116115	0.00233577	0.000862617
-403	0.0031964	0.00203123	0.00262984	0.00161397	0.00381435	0.00118951	0.00388198	0.00299071	0.0090178	0.00268635	0.00172829	0.00138289	0.00311819	0.00103861	0.000751621	0.000797681	0.00121788	0.00111347	0.00141264	0.000732016	0.00228008	0.00195965	0.00472826	0.00179935	0.000990463	0.000927813	0.00155616	0.000688956	0.00197401	0.00141446	0.00192386	0.00136372	0.0026135	0.000960765	0.00308103	0.00247518	0.00687303	0.00224285	0.00135938	0.00115535	0.00233718	0.000863784
-402	0.00316587	0.00201992	0.00261529	0.00161394	0.00385887	0.0011803	0.0038818	0.00299919	0.00892681	0.00270978	0.00172756	0.00137691	0.00309956	0.00103988	0.000748246	0.000789313	0.00120418	0.00111617	0.00140714	0.000722551	0.00227837	0.00196107	0.00470644	0.00179925	0.00099053	0.000923904	0.00156783	0.000689295	0.00195706	0.00140462	0.00190974	0.00136506	0.00263301	0.000951423	0.00308008	0.00248013	0.00681662	0.00225451	0.00135904	0.00115041	0.0023337	0.000864589
-401	0.00313439	0.00201988	0.00260152	0.00161673	0.00391674	0.00117434	0.0038693	0.00300294	0.00883145	0.00273376	0.00172419	0.0013704	0.00307509	0.00104184	0.000739366	0.000783781	0.00118954	0.00111703	0.00140407	0.000713973	0.00227052	0.00196351	0.00468656	0.00179809	0.000988356	0.000920086	0.00157627	0.00068824	0.00193688	0.00140183	0.00189553	0.00136688	0.0026604	0.000944158	0.00306991	0.00248323	0.00675901	0.00226593	0.00135627	0.00114524	0.00232568	0.000865038
-400	0.00310161	0.0020273	0.00258583	0.00162137	0.00397463	0.0011702	0.00383642	0.00300112	0.00870456	0.00275391	0.00171458	0.00136264	0.00303675	0.00104388	0.000733144	0.00078026	0.00117675	0.00111712	0.00140367	0.000706048	0.00225332	0.00196682	0.00466366	0.00179705	0.000982142	0.00091525	0.00157624	0.000686193	0.00191738	0.00140378	0.00188129	0.00136925	0.00268915	0.000938124	0.00304487	0.00248397	0.00668411	0.00227548	0.00134836	0.00113894	0.0023065	0.000865037
-399	0.00308553	0.00203274	0.00257442	0.00162531	0.00402184	0.00116699	0.00378532	0.00299132	0.00854126	0.0027666	0.00170034	0.00135408	0.00300118	0.00104555	0.000737469	0.000774422	0.00116449	0.00111552	0.00141266	0.000698684	0.00222472	0.00196988	0.00462916	0.00179546	0.000971814	0.000909682	0.00157272	0.00068336	0.0019115	0.00140358	0.00186946	0.00137042	0.00271725	0.000932835	0.00300502	0.0024806	0.00658521	0.00228103	0.00133608	0.00113188	0.00228695	0.000864457
-398	0.00307572	0.0020395	0.00256837	0.00162796	0.00406282	0.00116688	0.00371888	0.00298	0.00837377	0.00277869	0.00168856	0.00134688	0.00298019	0.00105009	0.000741535	0.000770564	0.00115342	0.00111198	0.00142879	0.000693659	0.00218741	0.00197025	0.00458226	0.00179196	0.000962139	0.00090379	0.00156634	0.000680388	0.00190863	0.00140503	0.00186089	0.00136997	0.0027458	0.000930272	0.00295315	0.00247513	0.00647802	0.00228533	0.00132535	0.00112534	0.00227326	0.000865241
-397	0.00305224	0.00204944	0.00257989	0.00162866	0.00412097	0.00116994	0.00363834	0.00296477	0.00824128	0.00278795	0.00167602	0.00134042	0.00296053	0.00105572	0.000734425	0.00077262	0.00114398	0.00110761	0.00145193	0.000690966	0.00214596	0.00196877	0.00451627	0.0017896	0.000951866	0.000898198	0.00155194	0.000676922	0.00189333	0.00141103	0.00186193	0.00136813	0.00278645	0.000930452	0.00289215	0.00246677	0.00637878	0.00228878	0.00131394	0.00111931	0.00225624	0.00086632
-396	0.00303586	0.00204666	0.00261354	0.00162111	0.00420022	0.00117109	0.00355359	0.00294552	0.00816437	0.0027902	0.0016618	0.00133281	0.0029387	0.0010601	0.000723598	0.000778364	0.00113748	0.00110236	0.00148199	0.000689562	0.00210824	0.00196776	0.00443904	0.00178882	0.00094076	0.000892639	0.00153172	0.000672955	0.00187973	0.00141251	0.00187551	0.00136173	0.00284111	0.000930328	0.00283091	0.00245664	0.0063017	0.00228951	0.00130128	0.00111272	0.00223521	0.000866529
-395	0.00305481	0.00202577	0.00266327	0.00160799	0.00428477	0.00117071	0.0034685	0.00292398	0.00812926	0.00278837	0.00164494	0.0013249	0.00291129	0.00106323	0.000719768	0.000783482	0.00113431	0.00109802	0.00151699	0.000690087	0.00207435	0.00196584	0.00436386	0.00178801	0.00092985	0.000886969	0.00150488	0.000669403	0.00188729	0.00140463	0.00189879	0.001353	0.00290088	0.000930398	0.00277142	0.00244491	0.00624656	0.00228819	0.0012874	0.00110593	0.00220808	0.000866319
-394	0.00308829	0.00200407	0.00269992	0.0015961	0.00434216	0.00117537	0.00338832	0.00289493	0.00812329	0.00277621	0.00162381	0.00131929	0.00289024	0.00106368	0.000724389	0.000786613	0.00113737	0.00109444	0.00154763	0.000694722	0.00204118	0.00196106	0.00429455	0.00178543	0.000916958	0.000882723	0.00147438	0.000666179	0.00190634	0.00139534	0.00191865	0.00134527	0.00294489	0.000935047	0.00271475	0.00242799	0.00620892	0.00228082	0.00127038	0.00110101	0.00218231	0.000864931
-393	0.00310218	0.00199518	0.00270106	0.00158709	0.00435474	0.00118297	0.00331483	0.00286164	0.00815152	0.00275372	0.00160405	0.00131608	0.00289217	0.00106138	0.000734598	0.000792208	0.00114705	0.00109078	0.00157314	0.000701136	0.00201235	0.00195508	0.00422347	0.00178015	0.000904669	0.000881206	0.00144549	0.000662991	0.00191839	0.0013937	0.00192406	0.00133893	0.00296394	0.000942055	0.00266359	0.00240836	0.00618749	0.00226693	0.00125436	0.00109864	0.00216883	0.000862186
-392	0.00309783	0.00199103	0.00268225	0.00158064	0.00433107	0.00119223	0.00324007	0.002828	0.00818867	0.00272309	0.0015863	0.00131256	0.00290125	0.00105657	0.000748459	0.00079812	0.00115689	0.00108768	0.00158923	0.00070834	0.0019878	0.00194855	0.00414283	0.00177521	0.000893298	0.000880586	0.00141464	0.000660289	0.00192315	0.00139458	0.00191957	0.00133416	0.00296015	0.000950285	0.00261394	0.00238828	0.00616575	0.00224915	0.0012398	0.00109657	0.00215795	0.000858432
-391	0.00308248	0.00198721	0.00265828	0.00157771	0.00428226	0.00120184	0.0031683	0.00279165	0.00823321	0.00268292	0.0015677	0.00130874	0.00291567	0.00104892	0.000760709	0.000804764	0.00116429	0.00108617	0.00160113	0.000715948	0.00196655	0.0019412	0.00404932	0.00177151	0.000880867	0.000879623	0.00138252	0.000657959	0.00192159	0.00139599	0.00191128	0.00133194	0.0029417	0.000958893	0.00256742	0.00236642	0.00614126	0.00222722	0.00122428	0.00109418	0.00214909	0.000853439
-390	0.00306245	0.00198511	0.00263772	0.00157856	0.0042234	0.00120915	0.00311171	0.00275602	0.00833	0.00264029	0.00155211	0.00130581	0.00295197	0.00103994	0.000769161	0.000812193	0.00116908	0.00108619	0.00160944	0.000722025	0.00195081	0.00193243	0.00394838	0.00176645	0.000870313	0.00087926	0.00135569	0.00065603	0.0019158	0.00139865	0.0019034	0.00133238	0.00291642	0.000965589	0.00253126	0.00234423	0.00613919	0.00220337	0.00121121	0.00109254	0.00215383	0.000847986
-389	0.00303728	0.00198692	0.00262325	0.00158115	0.00416237	0.00121404	0.0030689	0.00272657	0.00847903	0.00260214	0.00153607	0.00130358	0.00299717	0.00103062	0.000771767	0.000822787	0.00117183	0.00108876	0.00160785	0.000727166	0.00194063	0.00192352	0.00384932	0.00176221	0.000860583	0.000879451	0.00133305	0.0006551	0.00190452	0.00140485	0.00189754	0.00133495	0.00288511	0.000970604	0.00250477	0.00232504	0.00616418	0.00218217	0.00119833	0.00109152	0.00216511	0.000842862
-388	0.00300662	0.00199048	0.00260462	0.00159088	0.00410341	0.0012184	0.00303753	0.00269936	0.00862125	0.00256193	0.0015134	0.00130171	0.00302351	0.00101761	0.000773254	0.000832106	0.00117365	0.00108975	0.00160386	0.000731976	0.00193602	0.00191658	0.00376837	0.00176008	0.000848126	0.000880545	0.00131518	0.00065433	0.00188994	0.00141129	0.00188914	0.00134031	0.00285363	0.00097519	0.00248678	0.00230797	0.00619481	0.002161	0.00118076	0.00109113	0.00216935	0.000835972
-387	0.00299049	0.00199348	0.00257204	0.00161275	0.00403614	0.00122545	0.00301985	0.00267669	0.00870122	0.00252035	0.00149215	0.00129964	0.00304452	0.00100205	0.000782323	0.000836455	0.00117735	0.00108824	0.00159389	0.000737848	0.00193738	0.00191198	0.00373238	0.00175808	0.000837208	0.000881614	0.0013078	0.000653076	0.0018864	0.00141497	0.0018747	0.0013505	0.00281501	0.00098165	0.00247862	0.00229433	0.0062168	0.00213922	0.00116468	0.00109063	0.00217616	0.000827564
-386	0.0029783	0.00200341	0.00252505	0.00164663	0.00395164	0.00123646	0.00300483	0.00265732	0.00870358	0.00248222	0.00147248	0.00129737	0.00307211	0.000987885	0.00079458	0.000836986	0.00117984	0.00108926	0.00157462	0.000745585	0.0019374	0.00190796	0.003732	0.00175616	0.000827817	0.000882008	0.00130481	0.000652435	0.00188644	0.0014202	0.00185244	0.00136794	0.00276313	0.000991021	0.00247111	0.00228264	0.00621779	0.00211919	0.00115015	0.00108969	0.00218846	0.00082016
-385	0.00294485	0.00202423	0.00247386	0.0016903	0.00385772	0.00124777	0.00299037	0.00263857	0.00868702	0.00244526	0.00145407	0.00129567	0.00311576	0.000974969	0.000800185	0.000836131	0.00117816	0.00109243	0.00154885	0.000752875	0.0019349	0.00190414	0.003736	0.00175462	0.000818499	0.000882808	0.00130494	0.000652062	0.00187252	0.00143018	0.00182601	0.00139136	0.00270328	0.00100032	0.00246263	0.00227135	0.00621151	0.00209994	0.00113629	0.00108924	0.00221035	0.000813515
-384	0.00291479	0.0020492	0.00243854	0.0017362	0.00377735	0.00125601	0.00298059	0.00262727	0.00868927	0.0024155	0.00144114	0.00129355	0.00315819	0.000963364	0.000802711	0.000837729	0.00117439	0.00109613	0.00152453	0.000758262	0.00193434	0.00190196	0.00374062	0.00175466	0.000812661	0.000883146	0.00130763	0.000651398	0.00185875	0.00144347	0.00180646	0.00141617	0.00265094	0.00100714	0.00245746	0.00226461	0.00621494	0.00208508	0.0011269	0.00108835	0.00223291	0.000807381
-383	0.00290897	0.00207665	0.00243185	0.00178022	0.00372524	0.00126193	0.00297864	0.002622	0.0087106	0.00239271	0.00143237	0.00128905	0.00318385	0.000952636	0.000805193	0.000839942	0.0011699	0.00109889	0.00150194	0.000763241	0.00193588	0.00190097	0.00375808	0.00175657	0.000809961	0.000880921	0.00131338	0.000650043	0.00185708	0.0014583	0.00180088	0.00143955	0.00261359	0.00101259	0.00245726	0.00226149	0.00623434	0.00207464	0.00112116	0.00108499	0.00224861	0.00080134
-382	0.00293876	0.00210226	0.00245224	0.00182312	0.00371198	0.00126288	0.00299024	0.00262159	0.0087518	0.00237575	0.00142723	0.00128513	0.00320753	0.000943251	0.000808077	0.000840335	0.00116957	0.00110021	0.00148362	0.000765715	0.0019415	0.00190097	0.00379467	0.0017582	0.000810433	0.000877998	0.00132177	0.000647877	0.00187342	0.0014713	0.00181091	0.00146166	0.0025978	0.0010143	0.00246587	0.00226128	0.00627324	0.00206698	0.00111883	0.00108156	0.00226465	0.000795564
-381	0.00304219	0.00212487	0.00250457	0.00186295	0.00372919	0.00125988	0.00301048	0.00262751	0.0087892	0.00236706	0.00142641	0.00128312	0.00322937	0.000935917	0.00080871	0.000838913	0.0011695	0.00110046	0.00147397	0.000765607	0.00195039	0.00190197	0.00385343	0.0017601	0.000814219	0.000876212	0.00133271	0.000645623	0.00192545	0.00148189	0.00183703	0.0014817	0.00260158	0.00101274	0.00248044	0.00226474	0.00632131	0.00206358	0.00112032	0.00107967	0.00228104	0.00079077
-380	0.00320116	0.00214409	0.0025758	0.00189788	0.00375031	0.00125629	0.0030274	0.00263656	0.0087736	0.00236339	0.00142533	0.00128248	0.00322432	0.000929537	0.000804992	0.000834507	0.00116544	0.00109917	0.00147196	0.000765147	0.00195971	0.00190404	0.00393642	0.00176369	0.000817778	0.000875493	0.00134394	0.000642998	0.00200308	0.0014893	0.00187062	0.00149853	0.00261114	0.00101072	0.00249356	0.0022703	0.00635501	0.00206354	0.00112155	0.00107899	0.00228413	0.000786268
-379	0.00336757	0.0021549	0.00264604	0.00193064	0.00377734	0.00125227	0.00303991	0.00264357	0.00871486	0.00235856	0.00142792	0.00128332	0.00319475	0.000923079	0.000801636	0.00082372	0.0011609	0.00109602	0.0014757	0.000763861	0.00196937	0.00190634	0.00403665	0.0017662	0.000823516	0.000875869	0.00135009	0.000639404	0.0020846	0.00148931	0.00190347	0.00151333	0.00262652	0.00100807	0.00250464	0.00227496	0.00637576	0.00206238	0.00112572	0.00107959	0.00227242	0.000781241
-378	0.00354403	0.002154	0.00271739	0.00194589	0.00381267	0.00124538	0.00305089	0.00265126	0.00865993	0.00235461	0.0014385	0.00128256	0.00316906	0.000918727	0.000800476	0.000812216	0.00115769	0.0010981	0.00148151	0.000761069	0.00197885	0.00190962	0.00413659	0.001767	0.000833388	0.00087487	0.00135068	0.000636033	0.00217225	0.00148311	0.00193754	0.00152199	0.00264709	0.00100323	0.00251487	0.00228044	0.00639826	0.0020608	0.00113594	0.00107872	0.00225987	0.00077738
-377	0.00373923	0.00215158	0.00279724	0.00193689	0.00384911	0.00123361	0.00305343	0.00265696	0.00860993	0.00235278	0.00145372	0.00128079	0.00314175	0.000916538	0.000803313	0.000801866	0.00115533	0.00110379	0.0014902	0.000756348	0.00198397	0.00191297	0.00421788	0.00176764	0.000843883	0.000873287	0.00134801	0.000633691	0.00227127	0.00147672	0.00197629	0.00152034	0.00266966	0.000994977	0.0025187	0.00228497	0.00641391	0.00206021	0.0011488	0.00107704	0.00224488	0.000775114
-376	0.00395836	0.00215737	0.00288995	0.00191881	0.00389404	0.0012192	0.00305612	0.00265959	0.00857882	0.00235012	0.00147424	0.00127898	0.00310677	0.000913084	0.000809981	0.000793693	0.00115618	0.00110605	0.00150594	0.000749845	0.00198954	0.00191603	0.00428555	0.00176814	0.000855224	0.00087229	0.00134647	0.00063109	0.00238417	0.00147553	0.00202306	0.00151243	0.00269999	0.000984524	0.00252283	0.00228781	0.00643219	0.00205913	0.00116473	0.00107563	0.00222662	0.000772087
-375	0.00419978	0.00216743	0.00299065	0.00189544	0.00395005	0.00120464	0.00306518	0.00266175	0.00854674	0.00234705	0.00149759	0.00127665	0.00305847	0.000908128	0.000820449	0.000789007	0.00116157	0.00110644	0.0015265	0.000742661	0.0019987	0.00191989	0.00436073	0.0017682	0.000867763	0.000871082	0.00134572	0.000627714	0.00251011	0.00147822	0.00207611	0.00150094	0.00273828	0.000973651	0.00253194	0.00229082	0.00645373	0.00205763	0.00118268	0.00107386	0.0022021	0.000767921
-374	0.00442059	0.00217615	0.00308848	0.00186869	0.00401352	0.00118943	0.00307479	0.00266184	0.008495	0.00234293	0.00152019	0.00127487	0.00300905	0.000902996	0.00082554	0.000782236	0.0011674	0.00110677	0.00154953	0.000734731	0.00200861	0.0019241	0.00444129	0.00176781	0.000878903	0.000870266	0.00134655	0.00062402	0.00262307	0.00147919	0.00212794	0.00148773	0.00278152	0.000962078	0.0025417	0.00229297	0.00646814	0.00205537	0.00119954	0.00107257	0.0021778	0.000763508
-373	0.00460246	0.00217705	0.00317303	0.00184022	0.00407826	0.00117426	0.00308277	0.00266161	0.00843685	0.00233905	0.00154072	0.00127461	0.00297061	0.000898249	0.000821159	0.000775754	0.00117024	0.00110801	0.00157479	0.000726317	0.00201801	0.00192865	0.00451592	0.00176725	0.00088784	0.000870482	0.00134718	0.000620788	0.00271181	0.0014764	0.00217163	0.00147411	0.00282652	0.000950289	0.00255039	0.00229513	0.00647638	0.00205315	0.00121428	0.00107255	0.0021589	0.000759519
-372	0.00472992	0.00217877	0.00322603	0.0018094	0.00410211	0.00116251	0.00308658	0.00266337	0.00836975	0.00233753	0.00155933	0.00127358	0.00293494	0.000893571	0.000812191	0.000774293	0.0011676	0.00111003	0.00159493	0.000720303	0.00202466	0.00193365	0.00458107	0.00176735	0.000894657	0.000870057	0.00134956	0.000618071	0.00277106	0.00147653	0.00219682	0.00145972	0.00284852	0.000941405	0.00255562	0.00229851	0.00647541	0.00205244	0.00122699	0.00107182	0.00214225	0.000755821
-371	0.0047384	0.00218199	0.0032236	0.00177753	0.0040778	0.00115679	0.00308751	0.00266664	0.00830178	0.002337	0.00157417	0.00127131	0.0029076	0.000888853	0.000813992	0.000775828	0.00116997	0.00111248	0.00159905	0.000718468	0.0020278	0.00193843	0.00463064	0.00176732	0.000899048	0.000868429	0.00135318	0.000615492	0.00277619	0.00147891	0.00219678	0.001445	0.00283842	0.000937629	0.00255765	0.00230254	0.00646621	0.00205216	0.00123661	0.00106987	0.00213039	0.000752173
-370	0.00465205	0.0021859	0.00317798	0.00174591	0.00404092	0.00115657	0.0030929	0.00266984	0.00827144	0.0023367	0.00158775	0.00126812	0.00291372	0.000884589	0.000829451	0.000780454	0.00118549	0.00111517	0.00159227	0.000720074	0.00203119	0.00194281	0.00466124	0.00176682	0.000903401	0.000865797	0.00135493	0.000613373	0.00274075	0.00148318	0.00218173	0.00143054	0.00281659	0.000938323	0.00256205	0.00230632	0.00646634	0.00205176	0.00124557	0.00106696	0.00213433	0.000748981
-369	0.00457037	0.00219912	0.00312531	0.00171332	0.00400758	0.00116042	0.00310522	0.00267343	0.00828074	0.00233976	0.00160123	0.00126408	0.00295086	0.000880368	0.000848377	0.000791596	0.00120618	0.00111799	0.00158121	0.000724166	0.00203719	0.00194678	0.00467311	0.00176794	0.000907443	0.00086279	0.00135566	0.00061135	0.00270937	0.00149536	0.00216574	0.00141565	0.00279439	0.000942293	0.00257121	0.0023101	0.00647693	0.00205385	0.00125434	0.00106343	0.00215326	0.000745859
-368	0.00450473	0.00222881	0.00308171	0.00169048	0.00397507	0.00116693	0.00312215	0.00267495	0.00830407	0.002345	0.00161329	0.00126256	0.00299704	0.000875314	0.000871292	0.000807236	0.00122741	0.00111776	0.00156666	0.000729438	0.002045	0.0019486	0.00467917	0.00177075	0.000909174	0.000862132	0.00135704	0.000608762	0.00268801	0.00151802	0.00215456	0.00140412	0.00277086	0.000948186	0.00258358	0.00231178	0.00649162	0.00205787	0.00126123	0.00106234	0.00217704	0.000742038
-367	0.00441877	0.00225951	0.00304201	0.00168271	0.00394639	0.00117494	0.00314969	0.00267935	0.00835303	0.00235203	0.0016193	0.00126266	0.00304447	0.000870647	0.000892758	0.000827587	0.00124796	0.00111777	0.00155419	0.00073492	0.00205833	0.00194964	0.00469292	0.00177425	0.000909213	0.000862596	0.00135708	0.000606303	0.00265576	0.00154355	0.00214498	0.00140024	0.00275029	0.000954928	0.00260401	0.0023145	0.00652298	0.00206314	0.00126426	0.00106263	0.00220077	0.000738475
-366	0.00431669	0.0022729	0.00299974	0.00167663	0.00393409	0.0011826	0.00318427	0.00269002	0.00843003	0.00236396	0.00161964	0.00126268	0.00309488	0.00086868	0.000913733	0.000848544	0.00126733	0.00112044	0.00154371	0.000739466	0.002075	0.00195186	0.00471109	0.00177951	0.000908605	0.000862732	0.00135738	0.0006052	0.00261521	0.00156072	0.00213353	0.00139853	0.0027389	0.000961036	0.00262964	0.00232094	0.00657056	0.00207174	0.00126412	0.00106271	0.00222613	0.00073694
-365	0.00419853	0.00226711	0.00294598	0.00166515	0.00392729	0.00118943	0.00321873	0.00270309	0.00850787	0.00238004	0.00162009	0.00126359	0.00315139	0.000869584	0.000933039	0.000863803	0.00128503	0.00112136	0.00153457	0.000743015	0.00209172	0.00195412	0.00472532	0.00178624	0.000907759	0.000863323	0.00136072	0.000606055	0.00256578	0.00156546	0.00211551	0.00139326	0.00273093	0.000966222	0.00265523	0.0023286	0.0066166	0.00208314	0.00126392	0.00106346	0.00225606	0.00073782
-364	0.00407694	0.00225035	0.0028831	0.00164855	0.00391467	0.00119738	0.00325171	0.00271737	0.0085763	0.00239792	0.00162087	0.00126508	0.00320725	0.000872123	0.000951793	0.000876915	0.00130152	0.00111934	0.00152459	0.000747378	0.00210755	0.00195647	0.0047338	0.00179351	0.000907517	0.000864262	0.00136301	0.000608389	0.00251437	0.00156363	0.00209231	0.00138394	0.00271963	0.00097238	0.00267963	0.00233692	0.00665505	0.00209572	0.00126419	0.00106467	0.00228513	0.000740256
-363	0.00397778	0.00223313	0.00282156	0.00162909	0.00389969	0.00120481	0.00328146	0.00273079	0.00862864	0.00241581	0.00162149	0.00126652	0.00325667	0.000875387	0.000974777	0.000887042	0.00131813	0.0011152	0.00151395	0.000751402	0.00212112	0.0019583	0.00473467	0.00180116	0.000907122	0.000865627	0.00136168	0.000610961	0.00247628	0.00156008	0.00206984	0.00137214	0.00270682	0.000978106	0.00270129	0.00234455	0.00668166	0.00210849	0.00126431	0.00106607	0.00230917	0.000743174
-362	0.00392236	0.00221509	0.00277125	0.00160911	0.00390763	0.00121037	0.00330971	0.00273903	0.00866919	0.00243047	0.00162179	0.00126683	0.00329412	0.00087916	0.000996536	0.000893855	0.00133467	0.0011099	0.00150743	0.000753784	0.00213389	0.00195817	0.00473317	0.00180761	0.000906915	0.000866378	0.00135586	0.000613518	0.00245945	0.00155447	0.00205296	0.00135951	0.00270753	0.000982075	0.0027218	0.0023486	0.00670118	0.00211904	0.00126435	0.00106661	0.00232499	0.000746339
-361	0.00392688	0.00219919	0.00275005	0.00159242	0.00395175	0.00121149	0.00333796	0.00274208	0.00870534	0.00244115	0.00162384	0.00126481	0.00331052	0.000883187	0.00100532	0.000899082	0.00134476	0.00110391	0.00151387	0.000753524	0.00214816	0.00195699	0.00473649	0.00181255	0.000907825	0.000865626	0.0013483	0.000616004	0.0024661	0.00154914	0.00204741	0.00134817	0.00273281	0.000982506	0.00274306	0.00234953	0.00672092	0.00212685	0.00126583	0.00106522	0.00232941	0.000749595
-360	0.00397029	0.0021849	0.00274621	0.00158256	0.00401213	0.00120629	0.00336388	0.00274233	0.00870517	0.00244918	0.00162768	0.00126142	0.003291	0.000887639	0.00100688	0.00090247	0.00134473	0.0010983	0.00152975	0.000749659	0.00216107	0.00195482	0.00474659	0.00181693	0.000908639	0.000864058	0.0013463	0.000618505	0.00248858	0.00154368	0.00204547	0.00134043	0.00277094	0.000977973	0.00276248	0.00234857	0.00672588	0.00213306	0.00126816	0.00106274	0.00231865	0.000753072
-359	0.00398135	0.00216664	0.00272827	0.00157649	0.00404993	0.00119558	0.00338792	0.0027423	0.00865057	0.00245316	0.00163116	0.00125704	0.00323896	0.000893663	0.00100619	0.000903583	0.00133854	0.00109253	0.00154906	0.000742456	0.00217213	0.00195152	0.00477094	0.00181917	0.000908473	0.000861178	0.00135588	0.000621524	0.00249377	0.00153511	0.0020334	0.00133451	0.00279949	0.000969016	0.00278003	0.00234691	0.00671075	0.00213616	0.00126981	0.00105911	0.00229742	0.000757594
-358	0.00393118	0.00213492	0.00268568	0.001568	0.00407363	0.00118261	0.00340763	0.0027413	0.00856053	0.00245268	0.00163205	0.00125121	0.00316777	0.000900882	0.000993092	0.000899043	0.0013271	0.00108629	0.00157151	0.000733526	0.00218168	0.00194684	0.00479376	0.00181772	0.000909111	0.000856633	0.00136992	0.000624722	0.00246214	0.00151698	0.00200639	0.00132714	0.00282257	0.000958066	0.00279466	0.00234407	0.00667715	0.0021352	0.00127058	0.00105392	0.00226885	0.000762802
-357	0.00386556	0.00209091	0.00262786	0.0015555	0.00410427	0.00117119	0.00341616	0.00273323	0.00845251	0.00244742	0.00163261	0.00124412	0.00309132	0.000906671	0.000973927	0.000886513	0.00131191	0.00107756	0.00159529	0.000725013	0.00218511	0.00193965	0.00479992	0.0018128	0.000911155	0.00085057	0.00138352	0.000626601	0.00241974	0.00148871	0.00196988	0.00131653	0.00284978	0.000948103	0.00280063	0.00233644	0.00662621	0.00213011	0.00127188	0.00104734	0.00223742	0.000766636
-356	0.00379204	0.0020517	0.00256073	0.00154743	0.00410821	0.00116176	0.00341261	0.00271882	0.00832311	0.00243753	0.00163528	0.00123675	0.00301572	0.000910721	0.000955107	0.000871317	0.00129295	0.00106775	0.00161608	0.000717929	0.0021822	0.0019301	0.00479676	0.00180447	0.000914121	0.000843302	0.00139575	0.000626847	0.00237357	0.00146151	0.00192684	0.00130759	0.00286215	0.000939845	0.00279741	0.00232446	0.00655993	0.002121	0.0012747	0.00104003	0.00220573	0.000768784
-355	0.00371469	0.00203244	0.00249397	0.00155401	0.00408857	0.00115542	0.00340358	0.00270404	0.00820153	0.00242608	0.00163699	0.00122941	0.00293932	0.000914685	0.000936651	0.000860723	0.00127192	0.00106183	0.00163147	0.000713182	0.00217514	0.00192083	0.00478989	0.00179515	0.000917462	0.000835928	0.00140462	0.000626418	0.00232567	0.00144658	0.00188295	0.00130792	0.00286002	0.000934302	0.00278936	0.00231243	0.00649571	0.00211062	0.00127723	0.00103267	0.00217197	0.000770552
-354	0.00365004	0.00202761	0.00243349	0.00157353	0.0040671	0.00115036	0.00339629	0.00268615	0.00809764	0.00241269	0.00163538	0.00122166	0.00286782	0.000918623	0.00092144	0.000853869	0.00125143	0.00105993	0.00164454	0.000709015	0.00216667	0.00191315	0.00478357	0.0017865	0.000918769	0.000828946	0.00141315	0.000625473	0.00228574	0.00144074	0.00184246	0.00131673	0.00285582	0.000929685	0.00278148	0.00229965	0.00644061	0.00209959	0.00127708	0.0010253	0.00214048	0.000772048
-353	0.00358065	0.00202905	0.00237782	0.00160259	0.00404167	0.00114631	0.00339028	0.00266475	0.0080065	0.00239727	0.00163393	0.00121368	0.00280317	0.000922827	0.000905371	0.000848549	0.00123233	0.00106133	0.001654	0.00070531	0.0021599	0.00190674	0.00478654	0.00177774	0.000920838	0.000821989	0.00142484	0.000624647	0.00224301	0.0014388	0.00180507	0.00133196	0.00284783	0.000925808	0.00277509	0.00228575	0.00639652	0.0020875	0.00127738	0.00101784	0.002114	0.000773737
-352	0.00348943	0.00203135	0.00232834	0.00163855	0.00401304	0.00114416	0.00338404	0.0026463	0.00792763	0.0023833	0.00163204	0.00120821	0.00274942	0.000928291	0.000893966	0.000840692	0.00121616	0.00106516	0.00166326	0.000702652	0.00215518	0.00190224	0.00479435	0.00176962	0.000922359	0.000816882	0.00144094	0.000624709	0.0021917	0.00143602	0.00177225	0.00135185	0.00283815	0.000923405	0.00276961	0.00227427	0.00636099	0.00207646	0.0012772	0.00101255	0.00209518	0.0007765
-351	0.00341279	0.00202806	0.00229356	0.00167296	0.00399386	0.00114521	0.00337461	0.00263202	0.0078531	0.00237267	0.00162821	0.0012074	0.00270795	0.000935349	0.000897684	0.000830926	0.00119924	0.00107064	0.0016708	0.000701525	0.00214986	0.00189915	0.00479878	0.00176308	0.000922322	0.000815234	0.00145805	0.000626045	0.00215524	0.00142949	0.0017464	0.0013718	0.00283233	0.000923368	0.00276223	0.00226558	0.00632594	0.00206788	0.00127527	0.00101131	0.002083	0.000780697
-350	0.00335453	0.0020223	0.00228044	0.00169778	0.0039862	0.00115151	0.00335901	0.00262317	0.00780279	0.00236565	0.00162235	0.0012101	0.00267917	0.000943962	0.000900062	0.000821586	0.00118116	0.00107617	0.00167356	0.000703169	0.00214448	0.00189726	0.00480081	0.00175748	0.00092282	0.000815957	0.00146909	0.000628603	0.0021273	0.00142194	0.0017308	0.00138698	0.00282988	0.000927338	0.00275174	0.00226021	0.0063018	0.00206157	0.00127259	0.00101303	0.00207413	0.000786283
-349	0.00331868	0.00201551	0.00228893	0.00171732	0.00399926	0.00116223	0.00333654	0.00261781	0.00779391	0.00236319	0.00161345	0.00121459	0.00266612	0.000953173	0.000900525	0.000811155	0.00116579	0.0010818	0.00167495	0.000707026	0.00213766	0.00189788	0.0048026	0.00175377	0.000923426	0.000817944	0.00147267	0.000632366	0.0021096	0.00141333	0.00172736	0.00139956	0.00283711	0.000934628	0.0027371	0.00225785	0.00629826	0.00205848	0.00126844	0.00101627	0.00206939	0.00079277
-348	0.00333196	0.0020115	0.00231659	0.00173968	0.00400764	0.00117513	0.00331839	0.00261883	0.00782978	0.00236726	0.00160529	0.00121992	0.00267321	0.000962225	0.000912887	0.000800795	0.00115322	0.00108827	0.00167119	0.000712267	0.00213169	0.00190388	0.00481671	0.0017542	0.000923551	0.000820551	0.00147777	0.000637087	0.00212242	0.00140615	0.0017349	0.00141398	0.00283942	0.000943698	0.00272504	0.00226135	0.00632324	0.00206073	0.00126442	0.00102023	0.00207549	0.000799656
-347	0.00335869	0.00201926	0.00235345	0.00176314	0.00398369	0.00118578	0.0033149	0.0026298	0.00790388	0.00237808	0.0016001	0.00122812	0.00269426	0.000972579	0.00092578	0.000793085	0.00114152	0.00109551	0.00165593	0.000716469	0.00213197	0.00191493	0.00484894	0.00175898	0.00092194	0.000825636	0.00148612	0.000643098	0.00214224	0.00140617	0.00174748	0.00142932	0.00281981	0.000951122	0.00272343	0.00227236	0.00637641	0.00206853	0.00126102	0.00102688	0.00209019	0.000807839
-346	0.00338095	0.00202866	0.002394	0.00177849	0.00395767	0.0011946	0.00332265	0.00264336	0.00799771	0.00238973	0.00159314	0.00123987	0.00271535	0.00098217	0.000928977	0.000787454	0.00113061	0.00110143	0.00163409	0.000720144	0.00213728	0.00192753	0.00488664	0.00176637	0.00091745	0.000834448	0.00149393	0.000649402	0.00215496	0.00140805	0.00176231	0.00143996	0.00279588	0.000957371	0.00272996	0.00228545	0.00644217	0.00207805	0.00125529	0.00103716	0.00210464	0.000815786
-345	0.00340398	0.00202492	0.00243304	0.00177481	0.00394054	0.0012013	0.00333256	0.00265614	0.00808038	0.00239785	0.00158812	0.00125204	0.00273589	0.000988453	0.000926488	0.000781581	0.00111922	0.00110298	0.00161241	0.000723179	0.00214582	0.00193982	0.00492627	0.0017739	0.000911357	0.000844148	0.00150285	0.000654429	0.00216523	0.00140325	0.00177613	0.00143889	0.00277648	0.00096224	0.00273919	0.00229798	0.00650333	0.00208588	0.00124974	0.00104809	0.00211937	0.000821441
-344	0.00342893	0.00201147	0.00247195	0.00175712	0.00393093	0.00120595	0.00334258	0.00267174	0.00816182	0.00240519	0.00158908	0.00126398	0.00275526	0.000992403	0.00092483	0.000774136	0.00110593	0.00110204	0.0015925	0.000725413	0.0021573	0.00195052	0.00497258	0.00177988	0.000906373	0.000853204	0.0015135	0.000658712	0.00217688	0.00139281	0.00178894	0.00142958	0.00276172	0.00096568	0.00274994	0.00231113	0.0065672	0.00209254	0.00124773	0.00105859	0.00213438	0.000825558
-343	0.00346185	0.00199065	0.00251152	0.00173056	0.0039289	0.00121071	0.00335606	0.00269114	0.00825014	0.00241473	0.00158892	0.00127582	0.00276994	0.000994481	0.000927651	0.000766951	0.0010912	0.00109955	0.00157575	0.000728104	0.00217011	0.00196026	0.00501725	0.00178518	0.000900061	0.000861759	0.00152381	0.000662302	0.00219475	0.0013788	0.00180136	0.00141505	0.00275232	0.000969407	0.00276308	0.0023257	0.0066337	0.00209996	0.00124449	0.00106879	0.00214687	0.000828392
-342	0.00349984	0.00197005	0.00254808	0.00169734	0.00392366	0.00121552	0.00337042	0.00271206	0.00833754	0.00242716	0.00158784	0.00128614	0.0027825	0.000994077	0.000931559	0.000765372	0.0010745	0.00109632	0.00155618	0.000730941	0.00218254	0.00197029	0.00506036	0.00179202	0.000893798	0.000869476	0.00153388	0.000664915	0.0022157	0.00136771	0.00181129	0.00139683	0.00273992	0.000973229	0.00277648	0.00234118	0.00669895	0.00210959	0.00124082	0.00107781	0.00215819	0.000829496
-341	0.00349863	0.00195373	0.00255301	0.00166561	0.00388669	0.00121816	0.00339067	0.00273288	0.00843815	0.00244051	0.00158762	0.00129414	0.00280196	0.000991341	0.000926215	0.000765607	0.00106511	0.00109249	0.0015338	0.000732037	0.00219821	0.0019807	0.00511558	0.00180031	0.000888424	0.000875399	0.00154847	0.000666468	0.00221242	0.00135967	0.00180906	0.00137905	0.00271025	0.000975098	0.00279444	0.00235679	0.00677687	0.00212041	0.00123802	0.00108477	0.00217521	0.000828904
-340	0.00347399	0.00193765	0.00252215	0.00164065	0.00383768	0.00121752	0.00341888	0.00275054	0.00853992	0.00245069	0.00158719	0.00130017	0.00283201	0.000985213	0.000915196	0.000764229	0.00106115	0.00108854	0.00151471	0.000730944	0.00221659	0.00199152	0.00517731	0.00180825	0.000881117	0.000880085	0.00157055	0.000666044	0.0021946	0.00135094	0.00179165	0.0013646	0.00267619	0.000974234	0.00281773	0.00237103	0.00685861	0.00212947	0.00123416	0.00109013	0.00220128	0.000825628
-339	0.0034493	0.0019261	0.00247939	0.00162191	0.00380624	0.00121562	0.00345007	0.0027641	0.00861836	0.00245551	0.00158869	0.00130449	0.00286281	0.000976341	0.000898981	0.000762925	0.00105486	0.0010854	0.00149922	0.000730019	0.00223469	0.00200103	0.00522766	0.00181519	0.000872732	0.0008843	0.00159371	0.000663919	0.00217414	0.00134451	0.00176712	0.00135365	0.00265273	0.000972817	0.00284238	0.00238256	0.00692301	0.00213535	0.00123071	0.00109439	0.00222826	0.00082013
-338	0.003407	0.00193533	0.0024308	0.00160893	0.00378972	0.00122101	0.00347426	0.00277312	0.0086571	0.00245536	0.00159171	0.0013077	0.00288365	0.000968431	0.000873993	0.00076307	0.00105112	0.00108036	0.00148886	0.000727537	0.00225065	0.00200716	0.00525813	0.00182106	0.000865002	0.000887964	0.00161173	0.000662188	0.0021405	0.0013492	0.00174096	0.00134465	0.00263929	0.000974273	0.00286246	0.00239014	0.00695761	0.00213821	0.00122835	0.00109783	0.00224769	0.00081531
-337	0.00337745	0.00196159	0.00238867	0.00160307	0.0037966	0.00123752	0.00348308	0.00277706	0.00865261	0.00245002	0.00159515	0.00130817	0.00289348	0.000960671	0.000852492	0.00076304	0.0010508	0.00107291	0.00148637	0.00072415	0.00226205	0.00201009	0.00527	0.00182458	0.000861152	0.000889667	0.00162633	0.000660433	0.00211497	0.00136231	0.00171974	0.00133799	0.00264148	0.000980836	0.00287257	0.00239357	0.0069613	0.0021373	0.00122815	0.00109892	0.00225991	0.000810552
-336	0.00336083	0.00199638	0.00235497	0.00160588	0.00382031	0.00125912	0.0034825	0.00278247	0.00863066	0.00244503	0.00160166	0.0013044	0.00289929	0.000954351	0.000837125	0.000760845	0.00105307	0.00106572	0.00149185	0.000721225	0.00227109	0.00201341	0.00527923	0.00182724	0.000861781	0.000888141	0.00164104	0.000659149	0.00209898	0.00137861	0.00170402	0.0013358	0.00265608	0.000990171	0.00287679	0.00239794	0.00695494	0.00213614	0.00123172	0.00109627	0.00227017	0.00080675
-335	0.00335468	0.00204018	0.0023321	0.00162125	0.00386122	0.00128455	0.00348	0.002789	0.00860942	0.00244412	0.00160321	0.00129886	0.00290422	0.000951623	0.00082975	0.000756404	0.00105933	0.00106027	0.00150892	0.000717451	0.00227844	0.00201737	0.00528628	0.00183057	0.000864151	0.00088508	0.00165542	0.000659506	0.00209222	0.00139829	0.00169572	0.00134076	0.00268507	0.001001	0.00287922	0.00240319	0.00694785	0.00213735	0.00123368	0.00109197	0.00227982	0.000805565
-334	0.00338505	0.00208647	0.00232611	0.00164325	0.0039042	0.00131048	0.00347448	0.00279252	0.00856937	0.00244462	0.00159901	0.00129223	0.00290489	0.000951182	0.000826456	0.000750615	0.00106613	0.00105476	0.00153112	0.000712218	0.00228327	0.00202025	0.00528181	0.00183482	0.000867457	0.000881114	0.00166597	0.000660891	0.00210576	0.00141854	0.00169612	0.00134901	0.00271766	0.00101135	0.00287887	0.00240638	0.00692559	0.00213972	0.00123323	0.00108667	0.00228543	0.000806036
-333	0.0034447	0.00213512	0.00233095	0.00166699	0.00394118	0.00133425	0.00346338	0.00279256	0.00851111	0.00244333	0.00159636	0.0012843	0.0029037	0.000952383	0.000821713	0.000743288	0.00107129	0.001048	0.00155284	0.000705147	0.00228547	0.00202214	0.00527247	0.0018398	0.000871388	0.000876018	0.00167386	0.000663076	0.00213321	0.0014392	0.00170112	0.00135749	0.00274701	0.0010197	0.00287443	0.00240735	0.00689179	0.00214157	0.00123388	0.00108016	0.00228878	0.00080773
-332	0.00351459	0.00218017	0.00233926	0.00168964	0.00398901	0.00135658	0.0034474	0.00278767	0.00845002	0.00243722	0.00159491	0.00127556	0.00290453	0.00095437	0.00081686	0.000730896	0.00107886	0.00103863	0.00158061	0.00069729	0.0022853	0.00202202	0.00525799	0.00184233	0.000875841	0.000870083	0.00168043	0.000665093	0.00216573	0.00145553	0.00170906	0.00136413	0.00278481	0.00102693	0.00286635	0.00240485	0.00685401	0.00213977	0.00123537	0.00107282	0.00229248	0.000809732
-331	0.00361005	0.00221935	0.00236192	0.00170692	0.00404894	0.00137846	0.00342446	0.00278123	0.0083732	0.00242898	0.00159431	0.00126935	0.00289726	0.000956234	0.000814743	0.00071636	0.00108456	0.00102749	0.00160725	0.000690131	0.00227961	0.00202082	0.0052261	0.00184246	0.000881073	0.000866031	0.00167955	0.000666341	0.00221239	0.00146786	0.00172324	0.0013672	0.0028281	0.0010343	0.00285203	0.00240102	0.00679965	0.00213572	0.00123769	0.00106769	0.00228841	0.000811287
-330	0.00370482	0.0022568	0.00239774	0.00171912	0.0040928	0.00139991	0.00339983	0.00277614	0.00829881	0.00242327	0.00159495	0.00126566	0.00288096	0.000959501	0.000827081	0.000704058	0.00109072	0.00101619	0.00163485	0.000683735	0.0022702	0.00202035	0.00518756	0.00184323	0.000887916	0.000863381	0.00167103	0.000668263	0.00226595	0.00148043	0.00174423	0.00136765	0.00286383	0.00104182	0.00283502	0.00239825	0.00674318	0.00213325	0.00124143	0.00106452	0.002276	0.000813882
-329	0.0037839	0.00228881	0.00243718	0.00172495	0.00410674	0.00142173	0.00337955	0.00277077	0.0082504	0.00242063	0.00159355	0.00126406	0.00286505	0.000964208	0.000852715	0.000694329	0.00110119	0.00100366	0.00166667	0.000677282	0.0022628	0.00201985	0.00515947	0.00184445	0.000895032	0.000861504	0.00166204	0.000670676	0.00231831	0.00149157	0.00176918	0.00136431	0.0028867	0.00104951	0.00282118	0.00239531	0.00670494	0.00213254	0.00124429	0.00106278	0.00226354	0.000817442
-328	0.00386272	0.00228394	0.00247671	0.0017155	0.00412117	0.00142825	0.003362	0.00276275	0.00822221	0.00241913	0.00158685	0.00126442	0.00284778	0.000967439	0.000881798	0.000687175	0.0011111	0.000993748	0.00170151	0.000675143	0.00225606	0.00201834	0.00514424	0.00184495	0.000899531	0.000860903	0.00165285	0.000671791	0.00237226	0.00148556	0.00179391	0.00135462	0.00291134	0.0010517	0.00280903	0.00239054	0.00668323	0.00213204	0.00124319	0.00106266	0.00225031	0.000819615
-327	0.00391609	0.00223952	0.00250545	0.00169114	0.00415593	0.00141325	0.00334965	0.00275313	0.00821636	0.00241955	0.00157628	0.00126389	0.00283215	0.000970092	0.000906474	0.00068394	0.00112044	0.000988685	0.00173918	0.00067676	0.00224859	0.00201699	0.00514191	0.0018464	0.00089945	0.000859836	0.0016437	0.00067255	0.00241128	0.00146173	0.00181294	0.00133991	0.00294755	0.001045	0.00279912	0.00238506	0.00667914	0.00213297	0.00123787	0.00106186	0.00223793	0.000821321
-326	0.0039659	0.00217929	0.00252971	0.00165908	0.00419987	0.00138934	0.00334216	0.00274117	0.00821574	0.00241924	0.00156416	0.00126428	0.00282087	0.000972391	0.000931672	0.000684007	0.00112792	0.000986149	0.00176936	0.000677547	0.00223967	0.00201457	0.00514008	0.00184763	0.000896369	0.000859516	0.00163449	0.0006735	0.00244879	0.00143165	0.00182881	0.00132261	0.00298461	0.00103344	0.00279091	0.00237787	0.00667791	0.00213344	0.00123026	0.0010619	0.00222768	0.000822946
-325	0.00400959	0.00210951	0.00255034	0.00162075	0.00422033	0.00135938	0.00333675	0.0027288	0.00821231	0.00241576	0.00155381	0.00126585	0.00280864	0.00097265	0.000950485	0.000685044	0.00113059	0.000984701	0.00178015	0.000679411	0.00223006	0.00201217	0.00513701	0.00184719	0.000892082	0.000859812	0.0016233	0.000673516	0.00248004	0.00139728	0.00184046	0.00130273	0.00300024	0.0010194	0.00278341	0.00237048	0.00667466	0.00213148	0.00122294	0.00106283	0.00221597	0.000823083
-324	0.00397764	0.00204384	0.00253894	0.00158172	0.00423417	0.00133006	0.00333154	0.00272135	0.00822755	0.0024118	0.00154318	0.00126815	0.0028003	0.000971932	0.000959749	0.000689531	0.00113626	0.000984351	0.00178414	0.000684452	0.0022195	0.00201301	0.00513871	0.00184617	0.000885853	0.000860534	0.00161427	0.000672714	0.00246869	0.00136669	0.0018376	0.00128303	0.00300916	0.00100726	0.00277552	0.00236718	0.00668313	0.00212898	0.00121452	0.00106434	0.00220729	0.000822323
-323	0.00388376	0.00198229	0.00250095	0.00154546	0.00426301	0.00130466	0.00333091	0.0027205	0.00826064	0.00240894	0.00153318	0.00127488	0.00280084	0.000971191	0.00096784	0.000697175	0.00114839	0.00098609	0.00179307	0.000692396	0.00221039	0.00201751	0.00514573	0.00184488	0.000880431	0.000864599	0.00161031	0.000671974	0.0024258	0.00133973	0.00182467	0.00126577	0.00302804	0.000998528	0.00277065	0.002369	0.00670318	0.00212691	0.00120681	0.00106974	0.00220558	0.000821583
-322	0.00377554	0.00192493	0.00245945	0.00151214	0.00430038	0.00128002	0.00334077	0.0027257	0.00830746	0.00240914	0.00152617	0.00128771	0.00280775	0.000971458	0.000971289	0.000707955	0.00116004	0.000990225	0.0018022	0.000701093	0.00220582	0.0020253	0.0051632	0.00184544	0.00087665	0.000872345	0.00161001	0.000672393	0.00237342	0.00131644	0.00180974	0.00125118	0.00305129	0.000990556	0.0027733	0.0023755	0.00673533	0.00212729	0.00120141	0.00108003	0.00220888	0.000821925
-321	0.00365833	0.00188024	0.00242277	0.00148166	0.00436369	0.00125626	0.0033556	0.00273158	0.00837308	0.0024107	0.0015208	0.00129945	0.00282189	0.000973475	0.000970673	0.000725029	0.00117009	0.000995842	0.00182035	0.000709785	0.00220557	0.00203396	0.00519512	0.00184729	0.000873592	0.00087925	0.0016139	0.000674308	0.0023145	0.00130264	0.00179643	0.00123875	0.00309202	0.000983022	0.00278058	0.00238277	0.0067841	0.002129	0.00119719	0.00108935	0.00221789	0.000823891
-320	0.00356308	0.00184507	0.00240483	0.00145411	0.00444662	0.00123519	0.00336784	0.00273967	0.00842996	0.00241542	0.00151762	0.00130959	0.00283692	0.000977604	0.000958742	0.000744894	0.00117535	0.00100214	0.00183147	0.000718829	0.00220819	0.00203981	0.00522771	0.00184752	0.00087164	0.000885237	0.00162024	0.000676963	0.00226091	0.00129498	0.00179009	0.00122813	0.00313905	0.000977007	0.00278801	0.00238974	0.00682884	0.00213147	0.00119463	0.00109741	0.00222858	0.000827284
-319	0.00349656	0.00181316	0.00239813	0.00143426	0.00453257	0.00121328	0.00337902	0.00275613	0.00846667	0.0024269	0.00151976	0.0013206	0.00285085	0.000983836	0.000938172	0.000762536	0.00117424	0.00100938	0.00182624	0.000727169	0.0022113	0.00204582	0.00525264	0.00184793	0.000872134	0.000891644	0.00162626	0.000680233	0.00221737	0.00128785	0.00178618	0.00122182	0.0031794	0.000970225	0.00279516	0.00240097	0.00685966	0.00213742	0.00119595	0.00110612	0.00223855	0.000832034
-318	0.00344917	0.00180022	0.00239538	0.00142956	0.00460814	0.00119632	0.00339276	0.00278019	0.00850357	0.00244215	0.00152909	0.00133081	0.00287637	0.000990475	0.000924366	0.000777921	0.00117014	0.00101623	0.00181256	0.00073129	0.00221506	0.00205547	0.00527563	0.00184974	0.000876514	0.000897485	0.00163676	0.000683411	0.00218677	0.00128907	0.00178276	0.0012229	0.00321035	0.000963804	0.00280391	0.00241783	0.0068896	0.00214595	0.0012028	0.00111415	0.00225657	0.000836943
-317	0.00341547	0.00180991	0.00239814	0.00143541	0.00464276	0.00119042	0.00341077	0.00280998	0.00854746	0.00245937	0.00154142	0.00134506	0.00291171	0.000997661	0.000915273	0.000790022	0.00116237	0.0010208	0.00179217	0.000732744	0.00222211	0.00206724	0.00529205	0.00185146	0.000883053	0.000905895	0.00164976	0.00068629	0.00216537	0.00129997	0.00178026	0.00122811	0.00321747	0.000961582	0.00281644	0.00243861	0.00691976	0.00215542	0.00121224	0.00112548	0.00228073	0.000841975
-316	0.0033708	0.00182822	0.00239667	0.00144623	0.00464997	0.00119007	0.00343382	0.00284461	0.00861163	0.0024809	0.00155246	0.0013626	0.00295232	0.00100547	0.000901959	0.000798167	0.00115399	0.00102306	0.00177953	0.000735291	0.00223373	0.0020819	0.00530397	0.00185493	0.000889642	0.000916168	0.00166349	0.000688842	0.00213638	0.0013132	0.00177533	0.00123465	0.00321475	0.000962681	0.00283378	0.00246325	0.0069578	0.00216791	0.00122105	0.00113938	0.0023079	0.000847156
-315	0.00333237	0.00185203	0.00239475	0.00146169	0.00467064	0.00119171	0.00346037	0.00288042	0.0086871	0.00250635	0.00156369	0.00138108	0.00299859	0.00101381	0.000893146	0.000804901	0.00114765	0.00102493	0.00177859	0.000737185	0.00224923	0.00209632	0.00531579	0.00186022	0.000896202	0.000927127	0.00167948	0.000691593	0.00211276	0.00132846	0.0017712	0.00124331	0.00322462	0.000964446	0.0028548	0.00248837	0.00700144	0.00218329	0.00122995	0.0011541	0.00233903	0.000852703
-314	0.00333486	0.0018728	0.00241252	0.00148029	0.00468835	0.00119205	0.00348977	0.00291118	0.0087474	0.00253204	0.00157666	0.00140026	0.00304173	0.0010222	0.000888189	0.000808253	0.0011386	0.00102725	0.00177497	0.000737001	0.00226927	0.0021064	0.00532464	0.00186542	0.000904364	0.000939144	0.00169444	0.000694611	0.00211153	0.00134053	0.00177556	0.00125377	0.00323166	0.000964525	0.00287952	0.00250879	0.00703602	0.00219873	0.00124051	0.0011697	0.00236809	0.000858406
-313	0.00335105	0.00189901	0.0024422	0.00150366	0.004692	0.00119042	0.00351474	0.00293565	0.00878997	0.00255848	0.00158676	0.0014168	0.00307856	0.0010302	0.00087565	0.000807698	0.00112471	0.00102938	0.00176627	0.000734685	0.0022894	0.00211249	0.00532644	0.00187124	0.000912515	0.000949491	0.00170486	0.000697156	0.00211335	0.00135335	0.00178345	0.00126652	0.00322913	0.000962555	0.00290207	0.00252407	0.00705821	0.00221486	0.00124964	0.00118315	0.00239171	0.000863678
-312	0.00336238	0.00193863	0.00247035	0.00153544	0.0046806	0.0011919	0.00353135	0.00295568	0.00881015	0.00258428	0.00159015	0.00142688	0.00310182	0.00103794	0.000861093	0.000806753	0.00110884	0.00103193	0.0017547	0.000732703	0.0023059	0.00211537	0.00531826	0.00187648	0.000917149	0.000956345	0.00170881	0.000699057	0.00211174	0.00137269	0.0017896	0.00128369	0.00321765	0.000962303	0.00291862	0.00253552	0.0070642	0.00223038	0.00125365	0.00119161	0.00240531	0.000868496
-311	0.00337003	0.00197542	0.00249098	0.00157463	0.00463613	0.00119753	0.00354692	0.00297411	0.00880885	0.00260801	0.00158916	0.00143253	0.00311686	0.00104516	0.000844066	0.00080271	0.00109062	0.0010352	0.00173122	0.00073232	0.00232131	0.00211665	0.00530403	0.00187972	0.000919433	0.00096041	0.00171126	0.000700542	0.00210705	0.00138907	0.0017908	0.00130491	0.00318368	0.000964926	0.00293412	0.00254538	0.00705644	0.00224386	0.00125429	0.00119647	0.00241406	0.00087285
-310	0.00333929	0.00200964	0.00248544	0.00161779	0.00458942	0.00120492	0.00356561	0.00298606	0.00881936	0.00262447	0.00158544	0.00143491	0.00313676	0.00104975	0.000827392	0.000796935	0.00107405	0.00103777	0.00171128	0.000732257	0.00233625	0.00212145	0.00529587	0.00188486	0.000920435	0.000962733	0.00171432	0.000701962	0.00208334	0.00140329	0.00177975	0.00132778	0.00315035	0.00096859	0.00295093	0.00255375	0.00705762	0.00225467	0.00125294	0.00119882	0.00242554	0.000875857
-309	0.00327306	0.0020486	0.00245859	0.0016568	0.00456269	0.00121496	0.00358288	0.00298879	0.00884575	0.00263062	0.00157871	0.00143351	0.00315538	0.0010511	0.000813733	0.000794951	0.00106237	0.00104073	0.00170683	0.000732505	0.00234996	0.00212904	0.00529628	0.00189118	0.000920024	0.000963449	0.00171559	0.000702852	0.0020434	0.00142178	0.00176048	0.00134877	0.00313476	0.000973734	0.00296642	0.00255892	0.00707101	0.0022609	0.00124936	0.00119848	0.00243549	0.000876974
-308	0.00318335	0.00208821	0.00242618	0.00168448	0.00455349	0.00122862	0.00360185	0.00298602	0.00886652	0.00263371	0.00157045	0.00143295	0.00316225	0.00105299	0.000789731	0.000795195	0.00105318	0.00104319	0.00171508	0.000734905	0.00236434	0.002134	0.0052964	0.00189676	0.000919054	0.000964268	0.00171185	0.000704518	0.00198654	0.0014417	0.00173968	0.00136384	0.00313428	0.000981764	0.00298309	0.00256001	0.00708146	0.00226524	0.00124475	0.00119861	0.00243705	0.000878755
-307	0.00310809	0.00212452	0.00239385	0.00170805	0.00457538	0.00124315	0.00362061	0.00297758	0.00886314	0.0026351	0.00156378	0.00143025	0.00315726	0.0010542	0.000763981	0.000797367	0.00104882	0.00104578	0.00173843	0.000738704	0.00237864	0.00213607	0.00530352	0.00190234	0.000918773	0.000963263	0.00170647	0.000706786	0.00193603	0.00146094	0.00172134	0.00137692	0.0031569	0.000990925	0.00299962	0.00255682	0.00708333	0.00226872	0.00124127	0.00119675	0.00243186	0.000880493
-306	0.00305919	0.00215578	0.00236455	0.00172873	0.00461347	0.00125493	0.00363614	0.00296238	0.00882992	0.00263057	0.00156272	0.00142316	0.00314491	0.00105294	0.000745647	0.000801176	0.00104839	0.00104949	0.00176502	0.000740892	0.00239412	0.00213324	0.00532505	0.00190441	0.000921217	0.00095957	0.00170253	0.000708216	0.00190242	0.00147848	0.00170647	0.00138911	0.00318924	0.000997909	0.00301513	0.00254781	0.00707749	0.00226749	0.00124197	0.00119136	0.00242372	0.000880577
-305	0.00299326	0.00218364	0.00232993	0.001745	0.00464675	0.00126521	0.00365177	0.00294075	0.00880157	0.00262053	0.00156927	0.00141497	0.00313237	0.00104981	0.00072392	0.000805868	0.00105123	0.00105194	0.00179397	0.000741772	0.00241026	0.00212669	0.0053606	0.00190315	0.000927366	0.00095535	0.0017009	0.000708291	0.00185859	0.00149475	0.00169058	0.00139847	0.00322036	0.00100349	0.00303102	0.00253372	0.00708108	0.00226184	0.00124832	0.00118516	0.00241664	0.00087905
-304	0.00291996	0.00221323	0.00228871	0.00175546	0.00467602	0.00127692	0.00366745	0.00291834	0.00879768	0.00260897	0.00158187	0.00140736	0.00312476	0.00104516	0.000703551	0.000812931	0.00105657	0.00105255	0.00182938	0.000743515	0.002424	0.00212032	0.00540865	0.00190109	0.000935074	0.000951396	0.00170146	0.000707544	0.00181175	0.00151308	0.00167264	0.00140401	0.0032527	0.00101022	0.00304573	0.00251933	0.00710317	0.00225503	0.00125847	0.00117938	0.00241311	0.00087635
-303	0.00287269	0.00223002	0.00225078	0.0017537	0.00470022	0.00128973	0.00368789	0.00289747	0.00881354	0.00259604	0.00159994	0.00139918	0.00311636	0.00103966	0.000696723	0.000824221	0.00106321	0.00105106	0.0018632	0.000746659	0.00243759	0.00211417	0.00546494	0.00189761	0.00094307	0.000947275	0.00170342	0.000706564	0.0017847	0.00152712	0.001657	0.00140238	0.00328171	0.00101819	0.00306274	0.00250582	0.00713924	0.00224682	0.0012715	0.00117323	0.00240989	0.000873113
-302	0.00284445	0.00221932	0.00221686	0.00173556	0.00471594	0.00129919	0.00371546	0.00287858	0.00885419	0.00258294	0.00162782	0.00139176	0.0031176	0.00103345	0.000698224	0.000833309	0.00107085	0.00104747	0.00189267	0.000748782	0.00245221	0.00210904	0.00553044	0.00189354	0.000954995	0.000943611	0.00171079	0.000704922	0.00177133	0.00152632	0.00164385	0.00139151	0.00330431	0.00102399	0.00308383	0.00249381	0.00719232	0.00223824	0.00129141	0.00116769	0.0024142	0.000869184
-301	0.00282449	0.00220247	0.0021894	0.00170588	0.00473633	0.0013027	0.00374837	0.00286104	0.00891878	0.00257112	0.00166335	0.001388	0.0031266	0.00102598	0.000704713	0.00084048	0.00108146	0.00104261	0.00192714	0.000748646	0.00246822	0.00210451	0.00560413	0.00189119	0.000969908	0.000942364	0.00172054	0.000702068	0.0017646	0.00152147	0.00163543	0.00137424	0.00333173	0.00102567	0.00310829	0.00248278	0.00726145	0.00223116	0.00131663	0.00116518	0.00242357	0.000864024
-300	0.00282712	0.00217571	0.00217378	0.0016681	0.00473856	0.00129612	0.00378488	0.00284485	0.00898113	0.00256108	0.00170401	0.00138644	0.00313477	0.00101772	0.000711577	0.000843244	0.00109523	0.00103738	0.00196534	0.00074548	0.00248746	0.00209611	0.00567686	0.00188709	0.000986951	0.000942254	0.00173195	0.000697477	0.00176935	0.00150948	0.0016345	0.00135274	0.00335195	0.0010208	0.00313617	0.00247048	0.00732899	0.00222408	0.00134548	0.00116435	0.00243336	0.0008576
-299	0.00284344	0.00213158	0.00217281	0.0016261	0.00471382	0.00128087	0.00382638	0.00282683	0.00903309	0.00255067	0.00175193	0.00138466	0.00315413	0.00100894	0.000712904	0.000836407	0.00110963	0.00103008	0.00199965	0.000739954	0.00251033	0.00208158	0.00574462	0.00187886	0.00100798	0.000941561	0.00174962	0.000691655	0.00177817	0.00148399	0.00164122	0.00132809	0.00335673	0.00101041	0.00316835	0.0024542	0.00738885	0.00221477	0.00137996	0.00116311	0.00245188	0.000850299
-298	0.00286809	0.00208182	0.00217981	0.00158877	0.00467209	0.00126283	0.00386873	0.00280588	0.00909551	0.00253583	0.001803	0.00137871	0.00318465	0.000998165	0.000717185	0.000824493	0.00112375	0.00102121	0.00202189	0.00073292	0.00253673	0.00206496	0.00581515	0.00186755	0.00103054	0.000938966	0.00177092	0.000684606	0.00179264	0.00145316	0.00165178	0.00130499	0.00334699	0.000997875	0.00320273	0.00243542	0.00745533	0.00220169	0.00141677	0.00115884	0.00247778	0.000841385
-297	0.00286366	0.00202836	0.00218276	0.00155269	0.00461147	0.0012451	0.00390862	0.00278549	0.00918183	0.00251946	0.00185263	0.00137073	0.00322093	0.000986895	0.000722495	0.000807667	0.00113539	0.00101103	0.00202727	0.000725351	0.00256381	0.00204847	0.00588227	0.00185485	0.00105282	0.000935618	0.00179207	0.000676592	0.00179307	0.00141801	0.00165908	0.00128186	0.00331937	0.000985225	0.00323622	0.00241698	0.00753205	0.00218716	0.00145273	0.00115317	0.0025065	0.000831744
-296	0.0028256	0.00198241	0.0021801	0.00151864	0.00454523	0.00123177	0.00394275	0.00276693	0.00928051	0.00250614	0.00189523	0.0013636	0.00325831	0.000977368	0.000721536	0.000788519	0.00114297	0.000998982	0.00202418	0.000719921	0.00258412	0.00203364	0.00593403	0.00184475	0.0010716	0.000932751	0.00181153	0.000669319	0.00177357	0.00138546	0.00166154	0.00125881	0.0032847	0.000975846	0.00326343	0.00240028	0.00760727	0.00217545	0.00148342	0.00114818	0.00253492	0.000823343
-295	0.00280399	0.00194651	0.00217342	0.00148921	0.00447309	0.00122281	0.00396996	0.00275294	0.00936246	0.00249663	0.00192899	0.00135422	0.00328987	0.000969447	0.000721856	0.000769903	0.00114603	0.000986797	0.00201378	0.000716802	0.00259629	0.00202258	0.00596546	0.00183802	0.0010862	0.000928252	0.00182654	0.000663418	0.00176292	0.00135821	0.00165972	0.001238	0.00324344	0.000969806	0.00328312	0.00238776	0.00766396	0.00216733	0.00150759	0.00114123	0.0025582	0.000816432
-294	0.00278768	0.0019071	0.00216241	0.00146382	0.00441035	0.00121287	0.00399565	0.00274448	0.00942593	0.00248964	0.00195675	0.0013427	0.00331749	0.000962862	0.000720483	0.000750816	0.00114707	0.000975259	0.00199949	0.000712904	0.00260414	0.0020155	0.00598266	0.00183304	0.00109868	0.000921337	0.00183958	0.000658294	0.00175408	0.00132896	0.00165474	0.00121954	0.00320492	0.000962887	0.0032999	0.00237999	0.00770429	0.00216134	0.00152772	0.00113202	0.00257853	0.000810578
-293	0.00275044	0.0018708	0.00214484	0.00144739	0.00436071	0.00120008	0.00401949	0.00273746	0.0094814	0.00248305	0.00197931	0.00133142	0.00334615	0.000956344	0.000708487	0.000729437	0.00114685	0.000964875	0.001986	0.000707753	0.00260934	0.00201052	0.00599665	0.00182886	0.00110978	0.000913641	0.00185281	0.000653164	0.00172947	0.00130012	0.00164584	0.00120613	0.00317335	0.000953917	0.00331441	0.00237399	0.00773903	0.00215596	0.00154455	0.00112253	0.00259948	0.000804754
-292	0.00269864	0.00185464	0.00212165	0.00144098	0.00431998	0.00118564	0.00403467	0.00272721	0.00952084	0.00247364	0.00199239	0.00132141	0.0033652	0.000947997	0.000689959	0.000712754	0.00114643	0.000955455	0.00197499	0.000703001	0.00261337	0.0020042	0.00600527	0.00182385	0.00111768	0.00090633	0.00186147	0.000647622	0.0016943	0.0012837	0.00163404	0.00119822	0.00314749	0.000944318	0.00332402	0.0023657	0.00776306	0.00214874	0.00155504	0.00111387	0.00261334	0.000797809
-291	0.00264455	0.00184132	0.00209218	0.00143929	0.00428438	0.00117284	0.00404031	0.00271486	0.00953776	0.00246138	0.00199778	0.00131127	0.00336997	0.000939315	0.000669466	0.000697434	0.001145	0.000946241	0.00196377	0.000699244	0.00261448	0.00199664	0.00599998	0.00181709	0.00112287	0.000898744	0.00186289	0.000642573	0.00165701	0.00126938	0.00161859	0.00119276	0.00312408	0.00093604	0.0033274	0.00235575	0.00776887	0.00213923	0.00156033	0.00110501	0.00261643	0.000790944
-290	0.00259147	0.00183444	0.00205998	0.00144102	0.00426011	0.00116892	0.00404014	0.00270236	0.0095384	0.00244814	0.00199528	0.00130091	0.00336569	0.000931837	0.000649459	0.000686188	0.0011403	0.000938256	0.00194853	0.000698704	0.00260972	0.00199009	0.00598182	0.00181059	0.00112387	0.000891202	0.0018583	0.000638866	0.00162046	0.00126031	0.00160014	0.00118964	0.00310432	0.000933815	0.00332493	0.00234623	0.00776011	0.00212936	0.00155958	0.00109605	0.00261199	0.000785352
-289	0.00253998	0.00184683	0.00202082	0.00144783	0.0042488	0.00117383	0.00403308	0.00269402	0.00953792	0.00243845	0.00197928	0.00129248	0.00334567	0.000925369	0.000633102	0.000685563	0.001134	0.000933089	0.00192848	0.000701444	0.00259886	0.00198688	0.00595867	0.00180734	0.00111726	0.000884536	0.00184759	0.000636347	0.00158654	0.00126619	0.00157741	0.00119046	0.00308864	0.000937637	0.00331597	0.00234045	0.00774829	0.00212289	0.00154827	0.00108851	0.00259663	0.000780858
-288	0.00249308	0.00186956	0.00197307	0.00145759	0.00423329	0.0011836	0.00401629	0.0026917	0.00952188	0.00243394	0.00195358	0.00128765	0.0033104	0.00091989	0.000621182	0.00069121	0.00112678	0.000930926	0.0019052	0.000705641	0.00257944	0.00198666	0.00592511	0.00180772	0.00110513	0.000878811	0.00183306	0.000634713	0.00155713	0.00128038	0.00154993	0.00119426	0.00306924	0.00094462	0.00329786	0.00233918	0.0077235	0.00212083	0.00152935	0.00108323	0.00257173	0.000777301
-287	0.00246831	0.00190398	0.00192949	0.00147062	0.00420508	0.00119496	0.00399322	0.00269268	0.00947037	0.00242954	0.00192338	0.00128639	0.0032637	0.000914768	0.000612843	0.000704231	0.00111926	0.00093127	0.00187851	0.000709565	0.0025539	0.00198845	0.00587913	0.00180929	0.00109025	0.000874871	0.00181458	0.000633823	0.00154058	0.0013041	0.00152437	0.00120094	0.0030418	0.000952264	0.00327356	0.00234057	0.00767475	0.00211941	0.00150682	0.00108063	0.00253914	0.000774296
-286	0.00247258	0.00193267	0.00189901	0.00148256	0.00418258	0.0012051	0.00397073	0.00269607	0.00940309	0.00242246	0.00189372	0.00128862	0.00321048	0.00090944	0.000609642	0.000723237	0.00111428	0.000934331	0.00184766	0.000712775	0.00252906	0.00199196	0.00583156	0.00180938	0.00107573	0.000873192	0.00179145	0.000632939	0.00154111	0.00132795	0.00150664	0.00120844	0.00301512	0.000958937	0.00324989	0.00234401	0.00761733	0.00211592	0.00148472	0.00108091	0.00250096	0.000771189
-285	0.00247647	0.00195021	0.0018838	0.00149176	0.00417668	0.0012137	0.00394493	0.00270188	0.00933199	0.00241505	0.00186215	0.00129556	0.0031572	0.000905104	0.000608017	0.000745363	0.00111148	0.00093946	0.00181647	0.000715672	0.0025065	0.00199559	0.0057863	0.00180823	0.00106037	0.000874198	0.0017679	0.000632425	0.00154224	0.00134779	0.00149764	0.00121561	0.00299657	0.000964688	0.00322571	0.00234874	0.00755915	0.00211164	0.00146126	0.00108488	0.00246255	0.000768764
-284	0.00248058	0.00197148	0.00187951	0.00149955	0.00415984	0.00122372	0.00390986	0.00270564	0.00925218	0.00240679	0.00182577	0.0013045	0.00310565	0.00090132	0.000610021	0.000768836	0.0011085	0.000945565	0.00178428	0.00071979	0.00248555	0.00199667	0.00573859	0.00180689	0.00104296	0.000877464	0.00174511	0.000632277	0.0015453	0.00137016	0.00149401	0.00122256	0.00297206	0.000971753	0.00319771	0.00235116	0.00749539	0.00210684	0.00143436	0.00109098	0.00242538	0.000766799
-283	0.00250407	0.00199411	0.00188806	0.00150263	0.00413214	0.00123604	0.00386582	0.00270805	0.00915505	0.00239784	0.00178724	0.00131303	0.00305484	0.00089823	0.000618037	0.000792824	0.00110698	0.00095386	0.00175361	0.000724898	0.00246392	0.00199573	0.00568233	0.00180569	0.00102475	0.000881174	0.00172112	0.000632539	0.00156105	0.00139347	0.00149752	0.00122824	0.00294287	0.000980469	0.00316487	0.00235189	0.00741869	0.00210177	0.001406	0.0010971	0.00238798	0.000765384
-282	0.00253871	0.0019998	0.00191392	0.00150225	0.00410997	0.00124978	0.00382127	0.0027154	0.00904556	0.00239334	0.00175127	0.00132068	0.00301305	0.000898045	0.00062809	0.00081102	0.00110568	0.000964305	0.00172843	0.000729559	0.00243991	0.00199707	0.00561863	0.00180649	0.00100766	0.00088451	0.00170014	0.000634396	0.0015834	0.00140541	0.0015098	0.00123328	0.0029192	0.000989671	0.00313059	0.00235623	0.0073321	0.00209992	0.00137946	0.00110259	0.0023566	0.00076622
-281	0.00258586	0.00199736	0.00196112	0.00150162	0.00408552	0.00126313	0.00377878	0.00272719	0.00893635	0.00239387	0.00171903	0.00132816	0.00298893	0.000899452	0.000642227	0.00082676	0.00110217	0.00097519	0.00170255	0.000733761	0.00241486	0.00200179	0.00555828	0.00180979	0.000992557	0.000888026	0.00168858	0.000636938	0.00161404	0.00141206	0.00153165	0.00123841	0.00289404	0.000998445	0.00309682	0.00236449	0.00724732	0.00210183	0.0013558	0.00110809	0.00233876	0.000768195
-280	0.00264982	0.00199128	0.00202484	0.0015006	0.0040606	0.00127379	0.00373554	0.00274414	0.00883816	0.00239834	0.00169167	0.00133781	0.00297312	0.000901288	0.000662048	0.00083922	0.00109842	0.000984313	0.00167507	0.000737068	0.00239104	0.00200833	0.00550999	0.00181326	0.000980595	0.000892723	0.00168198	0.000639068	0.00165594	0.00141525	0.00156163	0.00124245	0.00286783	0.00100543	0.00306329	0.00237623	0.00717408	0.0021058	0.00133613	0.00111527	0.00232755	0.000770178
-279	0.00273506	0.00196912	0.00209904	0.00149651	0.00404144	0.0012817	0.00369879	0.00276455	0.00875416	0.00240533	0.00167267	0.00134923	0.00296411	0.000905099	0.000687531	0.000842888	0.00109551	0.00099088	0.00165467	0.000739768	0.00237164	0.00201588	0.00547195	0.00181544	0.000973196	0.000898903	0.00167857	0.000641594	0.00171129	0.001406	0.00159728	0.0012437	0.00284806	0.00101073	0.00303522	0.00239022	0.00711306	0.00211039	0.00132293	0.00112407	0.00232134	0.000773346
-278	0.00282543	0.00193348	0.00218047	0.00148667	0.00405227	0.00128426	0.00367539	0.00278412	0.00869689	0.00241423	0.00166229	0.00136015	0.00296848	0.000910606	0.000709601	0.000839143	0.00109418	0.00099542	0.00165452	0.000742361	0.00235821	0.00202416	0.00545029	0.0018174	0.00097036	0.000906301	0.00168182	0.00064468	0.00176752	0.00138631	0.00163733	0.00124105	0.0028534	0.00101331	0.0030168	0.00240414	0.00707359	0.00211581	0.00131633	0.00113323	0.00232515	0.000777643
-277	0.00290404	0.00188688	0.00226365	0.00147149	0.00410385	0.00128255	0.00366358	0.00280177	0.00868346	0.00242619	0.00165856	0.0013677	0.00298608	0.000916232	0.000722567	0.000829261	0.00109467	0.000997875	0.00167497	0.00074594	0.00235098	0.0020321	0.0054489	0.00181998	0.000970696	0.000912302	0.0016916	0.000647475	0.0018133	0.00135807	0.00167916	0.00123468	0.00288941	0.00101425	0.00300728	0.00241694	0.00706618	0.00212309	0.00131463	0.00114	0.00233884	0.000781854
-276	0.00295658	0.00184674	0.00233649	0.00145665	0.00415214	0.00127876	0.00366071	0.00281881	0.00870043	0.00244185	0.00165777	0.00137077	0.00301332	0.000922484	0.000730575	0.000818193	0.00109503	0.000999	0.00170865	0.000749773	0.00235005	0.00203893	0.00545792	0.00182414	0.00097257	0.000915275	0.00170769	0.000650297	0.00184358	0.00133247	0.00171576	0.00122782	0.00293039	0.00101426	0.00300538	0.00242887	0.00707918	0.002133	0.00131517	0.00114302	0.00236051	0.000786391
-275	0.00300025	0.00181346	0.00239738	0.00144387	0.00419062	0.00127311	0.00367452	0.00283297	0.00875108	0.00245709	0.00166334	0.00137002	0.00304745	0.000928191	0.00073483	0.000805201	0.00109587	0.00100011	0.00175146	0.000752697	0.00235816	0.00204443	0.00548239	0.0018285	0.000977973	0.000916192	0.00172691	0.000652226	0.00186754	0.00130933	0.00174662	0.00122199	0.00297104	0.0010129	0.00301634	0.0024387	0.00711673	0.00214279	0.00132066	0.0011431	0.00238718	0.000790209
-274	0.00305174	0.0017771	0.00245817	0.00143386	0.00424225	0.00126607	0.00370665	0.00284441	0.00883069	0.002471	0.00167657	0.0013671	0.00308329	0.000932949	0.000735302	0.000788674	0.00109992	0.00100137	0.00179771	0.000754286	0.00237427	0.00205008	0.00552249	0.001832	0.000986474	0.00091569	0.0017449	0.00065317	0.00189352	0.00128289	0.00177904	0.00121761	0.00301998	0.00101018	0.00304046	0.00244724	0.00717659	0.0021515	0.00133152	0.00114139	0.00241409	0.00079306
-273	0.00309905	0.00173894	0.00251242	0.00142692	0.00430123	0.00125945	0.00375286	0.00285596	0.00892985	0.00248499	0.00169338	0.00136368	0.00312469	0.00093686	0.000732908	0.000769692	0.00110525	0.00100017	0.00184399	0.000755748	0.00239656	0.00205739	0.00557274	0.00183505	0.000995913	0.000914988	0.00176256	0.000653531	0.00191598	0.00125431	0.00180884	0.00121355	0.00307261	0.0010076	0.00307471	0.00245667	0.00725129	0.00216002	0.00134465	0.00113934	0.00244363	0.000795195
-272	0.00314577	0.00170791	0.00254372	0.00142159	0.00435981	0.00125449	0.0038086	0.00286408	0.00905863	0.00249503	0.00170997	0.00135962	0.00317108	0.000938902	0.000728963	0.000751785	0.00111059	0.000996865	0.00188294	0.000758751	0.00242451	0.0020638	0.00563453	0.00183638	0.00100406	0.000913936	0.00177864	0.000652627	0.00193737	0.00122985	0.00182716	0.00120923	0.00312138	0.00100662	0.00311655	0.00246394	0.00734658	0.0021657	0.00135702	0.00113678	0.00247486	0.000795764
-271	0.00317099	0.00168233	0.00254309	0.00141967	0.00442772	0.00125183	0.00387175	0.00286955	0.00922056	0.00250153	0.00172389	0.00135433	0.0032206	0.000940067	0.000719671	0.000733812	0.0011202	0.000994496	0.00191971	0.000762904	0.00245692	0.00206824	0.0057057	0.00183593	0.00100927	0.000911626	0.00178788	0.000651286	0.00194533	0.00120807	0.00183165	0.00120708	0.00317371	0.00100736	0.00316433	0.0024689	0.00746313	0.00216873	0.00136658	0.00113298	0.00250424	0.000795677
-270	0.00316527	0.00165828	0.00251922	0.0014232	0.00450204	0.00125269	0.0039436	0.0028713	0.00940484	0.00250546	0.0017378	0.00134573	0.00328334	0.000940221	0.000704207	0.000715757	0.00113298	0.000995417	0.00195829	0.000768489	0.0024942	0.00207294	0.00578021	0.00183671	0.00101425	0.000907093	0.00179781	0.000650054	0.00193474	0.00118702	0.0018261	0.00120931	0.00323017	0.00101059	0.0032189	0.00247212	0.00759252	0.00217109	0.00137603	0.00112641	0.00254058	0.000795137
-269	0.00313147	0.00164353	0.00248198	0.00143146	0.00456403	0.00125495	0.00401211	0.00286579	0.00957781	0.00250307	0.00175019	0.00133347	0.00335109	0.000937172	0.000682607	0.000702413	0.00114372	0.000999128	0.00198893	0.000774255	0.00253169	0.00207645	0.00585165	0.00183847	0.001019	0.000900508	0.00180927	0.000647664	0.00190704	0.00117297	0.00181285	0.0012153	0.00327648	0.0010146	0.0032719	0.00247112	0.00771473	0.00217077	0.00138459	0.00111699	0.00258018	0.000792418
-268	0.00308547	0.00163521	0.00243941	0.00144353	0.00459546	0.00125999	0.00406858	0.00285636	0.00971883	0.00249285	0.00175751	0.00132139	0.00341446	0.000931277	0.000662182	0.000693369	0.00115131	0.00100369	0.00199479	0.000779656	0.00256767	0.00207776	0.00591049	0.00183824	0.00102105	0.00089376	0.00181681	0.000643867	0.00187383	0.00116429	0.00179536	0.00122361	0.00329512	0.00101982	0.00331813	0.00246706	0.00781466	0.00216554	0.00138928	0.00110757	0.00261563	0.000787572
-267	0.00304183	0.00162811	0.00239451	0.00145897	0.00462078	0.00126717	0.00411896	0.00284646	0.0098359	0.00247815	0.00176171	0.00131174	0.00348235	0.000925654	0.000647504	0.00068548	0.00115495	0.00100972	0.0019785	0.000784273	0.00260199	0.00207866	0.00595888	0.00183679	0.00102165	0.000888373	0.00182475	0.000640306	0.00184466	0.0011568	0.00177473	0.00123434	0.00329964	0.00102572	0.00336047	0.00246256	0.00789739	0.00215747	0.00139168	0.00110006	0.00265355	0.00078298
-266	0.00301295	0.00161537	0.0023513	0.00147526	0.00466789	0.00127497	0.00416826	0.00283486	0.00994348	0.00246111	0.00176524	0.0013041	0.00355806	0.000918854	0.000635906	0.000674837	0.00115685	0.0010165	0.0019527	0.000788085	0.00263389	0.00208053	0.00600976	0.00183522	0.00102141	0.000884837	0.00183148	0.000636567	0.00182443	0.0011451	0.00175407	0.00124588	0.0033103	0.00103153	0.00340108	0.00245769	0.00797662	0.00214817	0.00139333	0.00109447	0.00269477	0.000777711
-265	0.00298928	0.00159642	0.00231545	0.00148909	0.0047209	0.0012852	0.00421221	0.00282319	0.0100323	0.00244321	0.00176878	0.00129838	0.00363736	0.000910491	0.00063448	0.000660688	0.00116038	0.00102192	0.00192244	0.000793077	0.00266115	0.00208378	0.00605682	0.0018339	0.00101984	0.000882973	0.00183885	0.000632979	0.00181188	0.00112855	0.00173792	0.0012555	0.00332167	0.00103914	0.00343668	0.00245349	0.00804458	0.00213856	0.00139431	0.00109068	0.0027381	0.000771735
-264	0.00295144	0.00157782	0.00227364	0.00149835	0.00477108	0.0012996	0.00425566	0.00281515	0.0101157	0.00242619	0.00177539	0.00129374	0.00372164	0.000902856	0.000640521	0.000648144	0.00116267	0.00102651	0.00189586	0.000801246	0.0026856	0.00208841	0.00610241	0.001833	0.00101985	0.000881762	0.00185306	0.000630356	0.00179598	0.00111298	0.00171816	0.00126243	0.00333347	0.00105042	0.00347063	0.00245178	0.00810908	0.0021296	0.00139762	0.00108775	0.00278735	0.000766606
-263	0.00290643	0.00156207	0.00222486	0.00150598	0.00482476	0.00131497	0.00430429	0.00280808	0.0102167	0.00241028	0.00178771	0.00129054	0.00379824	0.000896479	0.000654278	0.000639402	0.00116248	0.00103222	0.00187346	0.000810279	0.00271194	0.00209317	0.00615824	0.00183284	0.0010236	0.000881474	0.00187185	0.000628236	0.00178035	0.00110074	0.00169367	0.0012691	0.00334911	0.00106263	0.00350812	0.00245062	0.00818749	0.00212156	0.00140565	0.00108601	0.00283504	0.000762357
-262	0.0028691	0.00155124	0.00218657	0.0015133	0.00487604	0.0013289	0.00435255	0.00280058	0.0102977	0.00239664	0.0018037	0.00128978	0.00385811	0.000891211	0.000677305	0.000633577	0.00116336	0.00103783	0.00185769	0.000817546	0.00273809	0.00209719	0.00621288	0.00183375	0.0010307	0.000882735	0.00189187	0.000626464	0.0017732	0.00109241	0.00167496	0.00127557	0.00336687	0.00107322	0.00354532	0.00244889	0.00825527	0.0021152	0.0014172	0.00108626	0.00287499	0.000758837
-261	0.00285541	0.00155052	0.00216431	0.00151527	0.00492088	0.00134295	0.00440063	0.0027915	0.0103233	0.00238355	0.00182144	0.00128982	0.00389489	0.00088597	0.000704388	0.000634062	0.00116267	0.00104124	0.00184771	0.000824512	0.00276008	0.00209997	0.00625118	0.00183526	0.00104024	0.00088474	0.00191555	0.000624544	0.0017799	0.00109229	0.00166349	0.00127825	0.00338429	0.00108373	0.00358035	0.00244573	0.00828725	0.00210941	0.00143084	0.00108728	0.00290522	0.000755257
-260	0.00286503	0.00156021	0.00214819	0.00150901	0.00496475	0.00135681	0.00444482	0.00278262	0.0102976	0.00237035	0.00183692	0.00129218	0.00390203	0.000881489	0.000736139	0.000640988	0.00115817	0.00104121	0.00183782	0.000831558	0.00277415	0.00210111	0.00627088	0.00183588	0.00104793	0.000888508	0.00193464	0.000622804	0.00180059	0.0011006	0.00165318	0.00127511	0.00340129	0.00109419	0.00360949	0.00244186	0.00828425	0.00210311	0.00144242	0.00109035	0.00291833	0.000752147
-259	0.00288496	0.00157935	0.00213536	0.00150176	0.00501681	0.00137475	0.00448614	0.0027788	0.010258	0.00236231	0.00185128	0.00129747	0.00389738	0.000879327	0.000768622	0.000651454	0.00115375	0.00103988	0.00182623	0.000840741	0.00278238	0.00210342	0.00627667	0.00183749	0.00105365	0.000894067	0.00194605	0.000622242	0.00182679	0.0011154	0.00164456	0.00127082	0.00342152	0.00110774	0.00363426	0.00244111	0.00826733	0.0020999	0.00145246	0.00109577	0.00292172	0.000750784
-258	0.00290307	0.00161146	0.00211959	0.00149841	0.0050779	0.00139492	0.00453167	0.0027791	0.0102263	0.0023612	0.00186581	0.00130156	0.00388796	0.000879543	0.000797437	0.000666699	0.00115211	0.00104003	0.00182604	0.000851141	0.00278881	0.00210799	0.00627915	0.00184182	0.00105981	0.000898521	0.00195433	0.00062318	0.00185026	0.00113908	0.00163585	0.00126922	0.00345197	0.00112303	0.00366024	0.00244355	0.00825272	0.00210151	0.00146281	0.00110004	0.00292114	0.000751361
-257	0.00292573	0.00165606	0.00209693	0.00149631	0.00510219	0.00141477	0.00457748	0.00278198	0.0101976	0.00236472	0.00187898	0.00130491	0.00386275	0.000879876	0.000825423	0.000686922	0.00115375	0.00104011	0.00184447	0.000861515	0.00279477	0.0021137	0.00628354	0.00184773	0.00106642	0.000901891	0.00195823	0.000624299	0.00187558	0.00117149	0.00162534	0.00126821	0.00347333	0.00113814	0.00368612	0.00244784	0.00824055	0.00210623	0.0014727	0.0011034	0.00291049	0.000752088
-256	0.0029507	0.00170567	0.00207536	0.0014938	0.00508101	0.00143487	0.00462014	0.00278753	0.0101552	0.00237163	0.00189234	0.00130945	0.00381985	0.000880291	0.000853071	0.000708572	0.00115545	0.00103877	0.00187135	0.000872348	0.0027996	0.00211994	0.00628277	0.00185472	0.00107417	0.00090546	0.0019651	0.000625213	0.00190188	0.00120712	0.0016154	0.00126628	0.00347618	0.00115361	0.00370987	0.00245374	0.00821899	0.00211318	0.00148326	0.00110745	0.00289247	0.000752752
-255	0.00298078	0.00176131	0.00205555	0.00149211	0.00505084	0.00145285	0.00466242	0.00279516	0.0101084	0.00238154	0.00190436	0.00131334	0.00376132	0.000882404	0.000870196	0.000734315	0.00115243	0.00103707	0.00189929	0.00088169	0.00280383	0.00212684	0.00627617	0.00186297	0.00108303	0.000908179	0.00197099	0.000626833	0.00192549	0.00124781	0.00160399	0.00126459	0.00347506	0.00116727	0.00373313	0.002461	0.00819227	0.00212225	0.0014937	0.00111076	0.00286616	0.000754618
-254	0.00302157	0.00182433	0.00204201	0.00149406	0.00502317	0.0014652	0.00469821	0.00280266	0.0100548	0.00239337	0.00190968	0.0013171	0.0036878	0.000884996	0.000876343	0.000764303	0.00114717	0.00103569	0.00192448	0.000887199	0.00280383	0.00213362	0.00625861	0.0018724	0.00108926	0.000910672	0.00196736	0.000628617	0.00194896	0.00129432	0.00159459	0.00126487	0.00347383	0.0011762	0.00375102	0.00246814	0.00815671	0.00213288	0.00149947	0.00111389	0.00282758	0.000756806
-253	0.00306146	0.00189014	0.00203822	0.00149919	0.00498913	0.00147392	0.00472304	0.00281325	0.00996954	0.00240836	0.00190812	0.00132013	0.00361368	0.000887915	0.000869922	0.000794416	0.00114404	0.00103497	0.00194597	0.000891008	0.00279465	0.00214128	0.00621874	0.00188357	0.00109091	0.000912281	0.00195936	0.000631021	0.00196569	0.00134228	0.00159113	0.00126708	0.00346755	0.00118246	0.00375884	0.00247727	0.00809414	0.00214597	0.00149951	0.00111621	0.00278652	0.000759468
-252	0.00307965	0.00195599	0.00203619	0.00150588	0.00495001	0.00148448	0.00474233	0.00283171	0.0098875	0.00242698	0.00190631	0.00132279	0.00354819	0.000891831	0.000852612	0.000823308	0.0011415	0.00103574	0.0019648	0.000897011	0.00278094	0.00215289	0.00617116	0.00189672	0.00109116	0.000913558	0.00195094	0.000634625	0.00196613	0.00138965	0.00158885	0.00127081	0.00345741	0.00119074	0.00376164	0.0024923	0.00802933	0.00216185	0.00149874	0.00111817	0.00274956	0.000763228
-251	0.00308487	0.00201265	0.00204005	0.00151699	0.00491805	0.00149354	0.00475993	0.00285389	0.00985267	0.00244694	0.00190739	0.00132738	0.00349213	0.000897162	0.000836475	0.000845811	0.00113985	0.00103823	0.00198561	0.000903665	0.00276874	0.00216726	0.0061373	0.00191052	0.00109199	0.000916375	0.0019389	0.000639319	0.00196067	0.00142923	0.00158995	0.00127761	0.00345183	0.0011986	0.00376434	0.00251058	0.00799499	0.00217873	0.00149969	0.00112188	0.00271551	0.000768241
-250	0.00309273	0.00205417	0.00205939	0.00153312	0.00489439	0.00149732	0.00478122	0.00287624	0.00986778	0.00246784	0.00191135	0.00133098	0.00344869	0.000902854	0.000819176	0.000859524	0.00114192	0.00104236	0.00201534	0.000908337	0.00276156	0.00218239	0.00612137	0.00192448	0.00109507	0.000918574	0.00192878	0.000644204	0.00195595	0.00145685	0.00160065	0.00128774	0.00345487	0.00120283	0.00377139	0.00252932	0.00799457	0.00219616	0.00150321	0.00112478	0.00268873	0.000773529
-249	0.00312022	0.00207463	0.0020935	0.0015447	0.00488021	0.00149154	0.00481175	0.00289919	0.00990702	0.00248728	0.00191582	0.0013318	0.00341011	0.000907624	0.00080175	0.000864146	0.00114831	0.00104569	0.00206419	0.000908986	0.00276209	0.00219748	0.00612458	0.00193659	0.00109954	0.00091868	0.00192481	0.000648367	0.00196098	0.00146939	0.0016209	0.0012952	0.0034722	0.00120026	0.00378692	0.00254833	0.0080158	0.00221193	0.00150768	0.00112524	0.00266746	0.000777996
-248	0.00318107	0.00208032	0.00215086	0.00154855	0.00488436	0.00147984	0.00485444	0.00292107	0.00995381	0.00250435	0.00192174	0.0013326	0.00337544	0.000910949	0.000790473	0.000860761	0.00115401	0.00104594	0.0021222	0.000907521	0.00276779	0.00221149	0.00613734	0.00194711	0.00110432	0.000919075	0.00192411	0.000651306	0.00198577	0.00147054	0.00165244	0.00129724	0.00350328	0.00119368	0.00381112	0.00256628	0.00804558	0.00222573	0.00151303	0.00112584	0.00264977	0.000781128
-247	0.00326806	0.0020785	0.00223533	0.00154943	0.00492228	0.00146733	0.00490358	0.0029399	0.0100027	0.00251894	0.00192917	0.00133292	0.00334874	0.000913669	0.000781344	0.000852179	0.0011583	0.00104539	0.00217392	0.000905565	0.00277295	0.00222312	0.00614553	0.00195625	0.00110854	0.00092	0.00192451	0.00065368	0.0020247	0.00146534	0.00169681	0.00129741	0.0035481	0.00118645	0.00383826	0.00258151	0.0080741	0.0022376	0.00151885	0.00112646	0.00263663	0.000783674
-246	0.00336559	0.00207636	0.00233008	0.00155027	0.00498711	0.00145364	0.00494682	0.00295662	0.0100557	0.00252961	0.00193377	0.00133112	0.00332782	0.000917736	0.000768682	0.000844184	0.00116604	0.00104659	0.00222503	0.000902255	0.00277436	0.00223179	0.0061466	0.00196247	0.00111016	0.000919709	0.00191871	0.000657022	0.00206714	0.00146027	0.00174806	0.00129843	0.00360607	0.00117795	0.00386059	0.00259421	0.00810115	0.00224604	0.00152197	0.00112542	0.00262327	0.000787379
-245	0.00345784	0.00207867	0.00241896	0.00155253	0.0050542	0.00144124	0.00497653	0.00297259	0.0100917	0.00253797	0.00193348	0.00132959	0.00331603	0.00092117	0.000762208	0.000837354	0.0011797	0.00104939	0.00227656	0.000899469	0.00277012	0.00223864	0.0061389	0.0019668	0.00110783	0.000919405	0.00191063	0.000659597	0.00211002	0.00145801	0.00179933	0.00130096	0.00366538	0.00117036	0.00387333	0.00260562	0.00811532	0.00225239	0.00152066	0.0011245	0.00261333	0.000790384
-244	0.0035414	0.00207617	0.00249922	0.00155311	0.0051081	0.00143185	0.00499139	0.00298703	0.0101067	0.00254413	0.00193004	0.0013292	0.00331204	0.000923581	0.000764792	0.000825784	0.00119495	0.00105211	0.00232196	0.000898811	0.00276363	0.00224444	0.00613078	0.00196955	0.00110387	0.000919773	0.00190629	0.000661371	0.0021531	0.00145098	0.00184709	0.00130261	0.00371503	0.00116533	0.00387751	0.00261574	0.00811874	0.00225684	0.00151696	0.00112449	0.00260917	0.000792476
-243	0.00362008	0.00207197	0.00257185	0.00155287	0.00515242	0.00142576	0.00499393	0.00299429	0.0101279	0.00254294	0.00192274	0.00132958	0.00330846	0.000924802	0.00077371	0.000812034	0.00120624	0.00105295	0.00235914	0.000899613	0.00276009	0.00224699	0.00613341	0.00196813	0.00109994	0.000920953	0.00190202	0.000662471	0.0021969	0.001442	0.00188904	0.00130291	0.00375578	0.00116269	0.00387701	0.00262064	0.00813065	0.00225553	0.00151134	0.00112527	0.00260524	0.000793637
-242	0.00370487	0.00206633	0.00263926	0.00155381	0.00519738	0.00141724	0.00499347	0.00299091	0.0101658	0.00253463	0.00190996	0.00132771	0.00330778	0.000924247	0.000785866	0.000799499	0.00121384	0.00105241	0.00239313	0.000898074	0.00275991	0.00224448	0.00613937	0.00196305	0.00109398	0.000920773	0.00189612	0.000662341	0.00224537	0.00143292	0.00192655	0.00130311	0.00379526	0.00115766	0.00387669	0.00261769	0.00815257	0.00224884	0.00150197	0.00112424	0.00260195	0.000793294
-241	0.00378749	0.00205928	0.00269389	0.001552	0.00522581	0.00140682	0.00498036	0.00298579	0.0101895	0.00252651	0.00189217	0.0013221	0.00331636	0.000922241	0.000790518	0.000791342	0.00121912	0.00105111	0.0024201	0.000894563	0.00276183	0.00224102	0.00613527	0.00195823	0.00108667	0.000917902	0.0018942	0.000661002	0.00228901	0.00142531	0.00195651	0.00130155	0.00382296	0.00115069	0.0038711	0.0026134	0.00816239	0.00224237	0.00148942	0.00112	0.00260528	0.000791621
-240	0.00386738	0.00206385	0.00272964	0.0015483	0.00522108	0.00139838	0.00494556	0.00298261	0.0101734	0.00251997	0.00186785	0.00131686	0.00332849	0.000919697	0.000790579	0.000793235	0.00121984	0.00104905	0.00242986	0.000891674	0.00276161	0.00223824	0.00611851	0.00195423	0.00107697	0.000915166	0.00189496	0.000659125	0.00232898	0.00142854	0.00197474	0.00129868	0.00382547	0.00114503	0.00385358	0.00261043	0.00814594	0.0022371	0.00147241	0.00111601	0.00261172	0.000789411
-239	0.00394018	0.00208813	0.00274864	0.00154879	0.00518295	0.00139482	0.00489377	0.00297861	0.0101417	0.002515	0.00184353	0.00131429	0.00334135	0.000917877	0.000795577	0.000805068	0.0012137	0.00104736	0.00241486	0.000890465	0.00275259	0.00223475	0.00608891	0.00195194	0.00106551	0.000914337	0.00189395	0.000657786	0.00236788	0.0014466	0.00198117	0.00129807	0.00379891	0.00114264	0.00382318	0.00260668	0.00811532	0.00223347	0.00145452	0.00111431	0.00261765	0.000787832
-238	0.00398465	0.0021184	0.00273477	0.00155483	0.00509866	0.00139756	0.00482009	0.00297653	0.0101151	0.00251236	0.00182271	0.00131315	0.00335625	0.000917434	0.000797492	0.000819045	0.00120733	0.00104736	0.00238149	0.000891153	0.00273658	0.00223244	0.00605663	0.0019515	0.00105406	0.000914228	0.0018924	0.000657429	0.00239107	0.00146872	0.00197105	0.0013011	0.00374008	0.00114435	0.00377834	0.00260448	0.00808588	0.00223193	0.00143839	0.00111369	0.00262433	0.000787431
-237	0.00398288	0.00214477	0.00267992	0.00156511	0.0049785	0.00140325	0.00473349	0.00297904	0.010093	0.00251076	0.00180442	0.00131295	0.00337257	0.000918735	0.000794795	0.000831964	0.00120174	0.00104725	0.00234055	0.000892522	0.00272208	0.00223395	0.0060288	0.00195251	0.00104397	0.000914336	0.00189015	0.000658353	0.00238884	0.00148837	0.00194083	0.00130618	0.00365952	0.00114789	0.00372778	0.00260649	0.00806092	0.00223164	0.0014242	0.00111365	0.00263136	0.000788544
-236	0.00395291	0.00216319	0.00259968	0.00157744	0.00483773	0.00141038	0.00465518	0.00298393	0.0100844	0.00251057	0.00179104	0.00131462	0.00339199	0.00091926	0.000797651	0.000841659	0.00119037	0.00104522	0.00228448	0.000895491	0.00271341	0.0022391	0.00600798	0.00195532	0.00103702	0.000915886	0.00189081	0.000658839	0.00237528	0.00150242	0.00189502	0.00131133	0.0035611	0.00115294	0.0036843	0.00261151	0.00804617	0.00223294	0.00141403	0.00111525	0.0026414	0.000789049
-235	0.00390224	0.00218064	0.0025096	0.00159548	0.00468297	0.00142198	0.00459062	0.00298783	0.0101116	0.00251165	0.00178226	0.00131846	0.00341034	0.000919594	0.000790906	0.000843483	0.00117076	0.0010407	0.00221496	0.000898604	0.00271031	0.00224473	0.0059955	0.00195886	0.00103295	0.000919334	0.0018933	0.000659458	0.00234658	0.00151206	0.00184018	0.00131809	0.00344896	0.00116029	0.00365047	0.00261628	0.00805356	0.00223525	0.0014076	0.0011189	0.00265182	0.000789526
-234	0.00384274	0.002214	0.00241905	0.00162644	0.00453496	0.0014403	0.00454009	0.00299204	0.0101718	0.00251456	0.00177735	0.00132272	0.00342436	0.000920574	0.000775009	0.000841915	0.001148	0.00103422	0.00214827	0.000899834	0.00271064	0.00225041	0.00598338	0.00196363	0.00103043	0.000923234	0.00189327	0.000660337	0.00230887	0.00152796	0.00178352	0.00133033	0.00334162	0.00117007	0.00362537	0.00262123	0.00807757	0.0022391	0.00140389	0.00112298	0.00265882	0.000790456
-233	0.00379378	0.00226525	0.0023302	0.00166196	0.00440363	0.00146409	0.00450212	0.0030014	0.0102464	0.00252344	0.00177634	0.00132597	0.0034346	0.000922963	0.000760176	0.000839595	0.00112731	0.00102745	0.00209385	0.00089826	0.00271168	0.00225879	0.00597076	0.00197181	0.00102844	0.000926438	0.00189211	0.000661417	0.00227698	0.00155242	0.00172875	0.0013447	0.00324874	0.00118118	0.0036069	0.0026301	0.00810856	0.00224762	0.00140239	0.0011262	0.00266335	0.00079219
-232	0.00374791	0.00233263	0.00223967	0.00169832	0.00428623	0.00149799	0.00446286	0.0030174	0.0103029	0.00253888	0.00177626	0.00133184	0.00343665	0.000927235	0.000746537	0.000832447	0.00110818	0.00102032	0.00204813	0.000896292	0.00271072	0.00227046	0.00596825	0.00198289	0.00102683	0.000931519	0.00189332	0.00066321	0.00224723	0.00158254	0.00167393	0.00135932	0.00316718	0.00119714	0.00358679	0.00264393	0.00813555	0.00226088	0.00140154	0.00113168	0.00266498	0.000795223
-231	0.00369893	0.00240592	0.00215046	0.0017389	0.00418623	0.00154014	0.00442879	0.00303434	0.0103503	0.00255564	0.00177623	0.00134164	0.00343029	0.000933182	0.000737619	0.000817833	0.00108974	0.001013	0.00200558	0.000896192	0.00270775	0.00228251	0.00598108	0.00199388	0.00102493	0.000939198	0.00189405	0.000665906	0.00221828	0.00161188	0.0016201	0.00137595	0.0030959	0.00121817	0.00356827	0.00265843	0.00816571	0.00227476	0.00140058	0.00114042	0.00266217	0.000799544
-230	0.00361574	0.00246485	0.00206517	0.00178016	0.004115	0.00158439	0.0044139	0.00304974	0.0104279	0.00257294	0.00178293	0.00135203	0.00342854	0.000940625	0.00072744	0.000792732	0.00107494	0.00100601	0.00197093	0.000897007	0.00270632	0.00229451	0.00600199	0.00200528	0.00102428	0.00094711	0.00189497	0.00066962	0.00217159	0.00162879	0.00157006	0.00139309	0.00304297	0.0012407	0.00356011	0.00267213	0.00821493	0.00228911	0.0014036	0.00114957	0.00266175	0.000805123
-229	0.00348165	0.002503	0.00198093	0.00181863	0.0040769	0.00162657	0.00440903	0.00306418	0.010511	0.00259037	0.00178878	0.00136207	0.00342852	0.000948469	0.000705246	0.00075837	0.00106512	0.000999239	0.00194935	0.000896428	0.00270929	0.00230722	0.00602721	0.00201644	0.00102507	0.000954634	0.00189563	0.000673524	0.00209345	0.00163069	0.00152302	0.00140894	0.00301313	0.0012615	0.00355916	0.0026857	0.00826912	0.0023034	0.00140693	0.00115835	0.00266208	0.000810997
-228	0.00332741	0.0025273	0.00190923	0.00185178	0.00407732	0.0016613	0.00441069	0.0030767	0.0105795	0.0026056	0.00178601	0.00137135	0.00342318	0.00095655	0.000677518	0.000724419	0.00105671	0.000991943	0.00193929	0.000893102	0.00271694	0.00231896	0.00605321	0.00202557	0.00102577	0.000961329	0.00189504	0.000677843	0.00200247	0.00162586	0.00148297	0.00142186	0.00300831	0.0012772	0.00356382	0.00269783	0.00831636	0.00231558	0.00140589	0.00116634	0.00265911	0.000817197
-227	0.00318052	0.00254905	0.00185791	0.0018788	0.00409958	0.00169217	0.00441932	0.00308661	0.0106487	0.0026203	0.00177787	0.00137959	0.00341716	0.000963635	0.000650081	0.000694337	0.00104893	0.000985565	0.00193382	0.00088963	0.00272557	0.0023281	0.00608529	0.00203339	0.00102444	0.000967139	0.00189748	0.000681577	0.0019153	0.00162169	0.00145342	0.00143218	0.0030167	0.0012909	0.00357244	0.00270736	0.00836697	0.00232684	0.00140116	0.00117336	0.00265732	0.000822606
-226	0.00305319	0.0025745	0.00183033	0.00190328	0.00416715	0.00172588	0.00442147	0.0030977	0.0107123	0.00263714	0.00176717	0.0013884	0.00341103	0.000970906	0.000616662	0.000665184	0.00104389	0.000981776	0.00194171	0.000887663	0.00273341	0.00233701	0.00612258	0.00204217	0.00102198	0.00097277	0.00190077	0.00068509	0.00183492	0.00161984	0.00143711	0.00144253	0.00305443	0.00130677	0.00357744	0.00271736	0.00841746	0.00233965	0.00139458	0.00118059	0.0026559	0.000827998
-225	0.00296047	0.00258253	0.00182405	0.00191633	0.00428495	0.00175282	0.00441881	0.00311192	0.0107541	0.00265618	0.00175759	0.00139577	0.00340835	0.000979305	0.000588781	0.000643205	0.00104282	0.000982444	0.00196924	0.000887783	0.00274331	0.00234848	0.00616909	0.00205274	0.00102036	0.000976709	0.00190582	0.000689324	0.00177462	0.00161286	0.00143343	0.00144939	0.00312709	0.0013203	0.00358106	0.0027302	0.00846161	0.00235446	0.00138897	0.00118624	0.00265709	0.000834315
-224	0.0028823	0.00255378	0.00182563	0.00190422	0.00441034	0.00176539	0.00441761	0.00312889	0.010773	0.00267738	0.00175114	0.0014041	0.00341784	0.000988193	0.000567601	0.000629229	0.00104543	0.00098741	0.00200393	0.000890674	0.00275682	0.00236262	0.0062329	0.00206416	0.00102036	0.000980869	0.00191827	0.000694027	0.00172495	0.00159151	0.00143553	0.00144582	0.00320713	0.00132803	0.00358722	0.00274576	0.00850296	0.00237077	0.00138575	0.00119248	0.00266805	0.00084111
-223	0.00280175	0.00248413	0.00183091	0.00187656	0.00453727	0.00176614	0.00441716	0.00314962	0.0107724	0.00270203	0.00174899	0.00141569	0.00344106	0.000996592	0.000546218	0.000617353	0.00105011	0.000994554	0.00204032	0.000898731	0.00277294	0.00237786	0.00630116	0.00207555	0.00102249	0.000986593	0.00193756	0.00069886	0.00167398	0.00155074	0.00144051	0.00143556	0.0032888	0.00133243	0.00359505	0.00276374	0.0085368	0.00238879	0.00138574	0.00120114	0.00268931	0.000847726
-222	0.00271792	0.00237876	0.00184095	0.00184176	0.00465299	0.00175199	0.00442614	0.00317246	0.0107731	0.00272641	0.00175153	0.00142629	0.00347529	0.00100455	0.000522047	0.000611596	0.00105499	0.00100324	0.00207111	0.000911321	0.00279308	0.00239301	0.00636191	0.00208562	0.00102586	0.000991116	0.00195931	0.000703996	0.00161998	0.00149518	0.00144797	0.0014225	0.00336205	0.00133165	0.00360961	0.00278273	0.00856751	0.00240602	0.00138869	0.0012087	0.0027173	0.000854273
-221	0.00263489	0.00227469	0.00185858	0.0018116	0.00476117	0.00172888	0.00444425	0.00319638	0.0107842	0.00274718	0.00175867	0.00143699	0.00351887	0.00101209	0.000497223	0.000609711	0.00105966	0.00101085	0.00210287	0.000923154	0.00281863	0.00240749	0.00641566	0.00209407	0.00103085	0.000995421	0.00198245	0.000709448	0.00156606	0.0014422	0.00145912	0.00141123	0.00343202	0.00132602	0.00363144	0.00280194	0.00859995	0.00242063	0.00139476	0.0012162	0.00275066	0.000860771
-220	0.00258118	0.00220785	0.00188263	0.00180243	0.00486845	0.00170822	0.00445696	0.00322146	0.0107773	0.00276471	0.00176508	0.00145062	0.00356558	0.00101862	0.000480126	0.000611241	0.00106302	0.0010158	0.00214259	0.000934925	0.00284836	0.00242091	0.00647026	0.00210029	0.00103794	0.00100066	0.00200562	0.000714599	0.00153065	0.00140954	0.00147283	0.00140911	0.00350552	0.00132157	0.00365266	0.00282119	0.00862376	0.0024325	0.00140151	0.00122564	0.0027856	0.00086661
-219	0.00257038	0.00217175	0.00191102	0.00180807	0.00496316	0.00169414	0.00447044	0.00324886	0.010758	0.00278419	0.00177505	0.00146651	0.00362632	0.00102575	0.000473841	0.000621746	0.00106466	0.00102036	0.00218407	0.000950847	0.00288268	0.00243439	0.00652566	0.00210549	0.00104706	0.00100659	0.00203341	0.000720169	0.00152211	0.00139675	0.00148784	0.00141422	0.00357362	0.0013225	0.00367656	0.00284163	0.00864181	0.00244484	0.00141105	0.00123655	0.00282987	0.000872961
-218	0.00258247	0.00215079	0.0019416	0.00181678	0.00505443	0.00168794	0.00449258	0.00327626	0.0107441	0.00280765	0.00179602	0.00148475	0.00370056	0.00103281	0.000475088	0.000636309	0.00106461	0.00102553	0.00222591	0.000971145	0.00291879	0.00244812	0.00658163	0.00211155	0.00105915	0.00101474	0.0020661	0.000725327	0.00152878	0.00139355	0.0015031	0.00142115	0.00364017	0.00132954	0.00370569	0.00286219	0.00866285	0.0024596	0.00142759	0.00124975	0.00288333	0.000879069
-217	0.0026196	0.00213298	0.00197861	0.00182633	0.00516254	0.00168731	0.00451775	0.00330023	0.0107281	0.00283113	0.00182519	0.00150377	0.00377767	0.00103916	0.000481852	0.000649639	0.00106503	0.00103001	0.00227228	0.000993855	0.00295464	0.00246156	0.00663331	0.00211823	0.00107519	0.00102376	0.00209969	0.000730032	0.00155072	0.00139131	0.00152182	0.00142817	0.00371741	0.00134058	0.0037362	0.00288089	0.0086807	0.00247468	0.00145019	0.00126376	0.00293868	0.000884597
-216	0.00265906	0.00211732	0.00201119	0.00183511	0.00521678	0.00168486	0.00454748	0.00331697	0.0107101	0.00285049	0.00185773	0.00151842	0.00386135	0.00104546	0.000497716	0.00066355	0.00106759	0.00103278	0.00231256	0.00101561	0.00298806	0.0024715	0.0066766	0.00212278	0.00109212	0.00103063	0.00213285	0.000735169	0.00157839	0.00139043	0.00153939	0.00143395	0.00376467	0.00135023	0.00376777	0.00289424	0.00869337	0.00248664	0.00147493	0.00127453	0.0029971	0.000890315
-215	0.00271236	0.00211511	0.00204258	0.00184721	0.00522252	0.00168482	0.00457674	0.00333124	0.0106953	0.00286796	0.00189182	0.00152964	0.0039445	0.00105192	0.000515778	0.000674973	0.00107102	0.00103209	0.00234192	0.00103649	0.00301659	0.00247712	0.00671018	0.00212331	0.00110901	0.00103517	0.00216175	0.000739524	0.00161407	0.00139504	0.0015568	0.00143965	0.00378222	0.00136065	0.00379667	0.00290418	0.00870274	0.00249563	0.00150041	0.0012824	0.00305312	0.000895724
-214	0.00279582	0.00213223	0.00208306	0.00187151	0.00524663	0.00169427	0.00460682	0.00334686	0.0106972	0.00288928	0.00192783	0.00153761	0.00401829	0.00105947	0.000530689	0.000681888	0.00107292	0.00102877	0.00237145	0.00105759	0.00304285	0.00247821	0.00673179	0.00211932	0.00112658	0.00103669	0.0021823	0.000742799	0.00166325	0.00140706	0.00157799	0.00145014	0.00380904	0.00137593	0.00382483	0.00291253	0.00871452	0.0025043	0.00152721	0.00128715	0.00310029	0.000901133
-213	0.00289219	0.00217097	0.00212819	0.00190523	0.00526753	0.00170932	0.00464638	0.00335616	0.010728	0.0029067	0.00196511	0.00154255	0.00408801	0.00106747	0.000548326	0.000688089	0.00107477	0.00102446	0.00239431	0.00107604	0.00307039	0.00247532	0.0067487	0.00211275	0.00114548	0.00103678	0.00219649	0.000745761	0.00172026	0.00142953	0.00160148	0.00146485	0.00383092	0.00139268	0.00385838	0.00291574	0.00873834	0.00250972	0.00155529	0.00128966	0.00314225	0.000906614
-212	0.00301814	0.00223397	0.00218065	0.00194002	0.00528439	0.00172966	0.00468853	0.00335746	0.0107682	0.00291945	0.00200255	0.00154713	0.0041545	0.00107422	0.000571228	0.000695514	0.00107961	0.00101923	0.00241321	0.00109142	0.00309599	0.00247076	0.006758	0.00210771	0.00116618	0.00103723	0.00220641	0.000747809	0.00179469	0.00146474	0.00163013	0.00147962	0.0038488	0.00141054	0.00389226	0.00291411	0.00876311	0.00251358	0.00158436	0.00129218	0.00318046	0.000911017
-211	0.00317232	0.0022837	0.00222744	0.00195624	0.00529492	0.00175106	0.00473	0.00335589	0.0108067	0.00293543	0.00203754	0.00154729	0.00421422	0.00107948	0.000599511	0.000711814	0.0010844	0.00101817	0.00242704	0.00110704	0.00311448	0.00246698	0.00676066	0.0021053	0.00118597	0.00103549	0.00221434	0.000748811	0.00188592	0.00149776	0.00165592	0.0014872	0.00386098	0.00142905	0.00392224	0.00291144	0.00878367	0.00252036	0.00161175	0.00129139	0.00321428	0.000914145
-210	0.00333656	0.00227854	0.00226626	0.00193039	0.00530742	0.00176615	0.00477949	0.00335305	0.0108675	0.00295175	0.002073	0.00154008	0.00426003	0.00108437	0.00062906	0.000732467	0.0010875	0.00102353	0.00243398	0.001122	0.0031264	0.00246422	0.00676644	0.00210393	0.00120461	0.00103106	0.0022211	0.000749608	0.00198281	0.00150551	0.00167688	0.00147696	0.0038707	0.00144407	0.00395295	0.00290864	0.00881697	0.00252784	0.0016388	0.00128557	0.00324057	0.000916988
-209	0.00349552	0.00224259	0.0023033	0.00187746	0.00534245	0.00177584	0.00483593	0.00334652	0.0109694	0.00295999	0.0021075	0.00152811	0.00428211	0.00108691	0.000655291	0.000747073	0.00108974	0.00103004	0.00244092	0.00113393	0.00313267	0.00245969	0.00677635	0.00210257	0.0012217	0.00102521	0.00222211	0.000748874	0.0020754	0.00149483	0.00169652	0.00145375	0.00389169	0.00145489	0.0039843	0.00290311	0.00887289	0.00253128	0.0016646	0.00127666	0.00325211	0.000917894
-208	0.00364307	0.00220377	0.00233554	0.00182467	0.00538079	0.00178127	0.00489411	0.00334128	0.0111004	0.00296217	0.00213599	0.00151336	0.00429236	0.0010874	0.000677832	0.000758081	0.00109096	0.00103624	0.00244814	0.0011426	0.00313557	0.00245503	0.00678406	0.0021016	0.00123555	0.00101715	0.00221808	0.000746966	0.00216045	0.00148093	0.00171325	0.00143046	0.00391446	0.00146194	0.00401484	0.00289816	0.00894224	0.00253189	0.00168577	0.00126525	0.00325522	0.000917184
-207	0.00375926	0.00216792	0.00235336	0.00177544	0.00540656	0.00178064	0.00495268	0.00334279	0.0112262	0.00296652	0.00215883	0.00149769	0.00429953	0.00108857	0.000695107	0.000769261	0.00108931	0.0010427	0.00245622	0.00114743	0.00313813	0.00245219	0.00678602	0.00210124	0.00124649	0.00100812	0.00220949	0.000745051	0.00222718	0.00146859	0.00172133	0.00140907	0.00393139	0.00146403	0.00404541	0.00289749	0.00900613	0.00253388	0.00170266	0.0012529	0.00325451	0.00091681
-206	0.00385638	0.00213182	0.00235536	0.00172779	0.00547766	0.00177785	0.0050126	0.00335228	0.0113546	0.002976	0.00217819	0.00148539	0.00429868	0.00108982	0.000706265	0.000781658	0.00108504	0.00104929	0.00247565	0.00115088	0.00314338	0.00245289	0.00679122	0.00210271	0.00125622	0.00100069	0.00220016	0.000742529	0.00228132	0.00145674	0.0017202	0.00138854	0.00397665	0.00146436	0.00407799	0.00290259	0.00907293	0.00253936	0.00171721	0.00124304	0.00324942	0.000916173
-205	0.00388207	0.00209862	0.00233042	0.00168317	0.00557093	0.0017736	0.00507658	0.00336296	0.0115074	0.0029815	0.0021931	0.00147557	0.00429715	0.00108882	0.000716865	0.000797584	0.0010814	0.00105706	0.00250716	0.00115218	0.00315316	0.00245621	0.00680453	0.00210753	0.00126431	0.000996059	0.00219438	0.000740309	0.00229947	0.0014481	0.00170591	0.00137012	0.00403904	0.00146289	0.00411487	0.00290959	0.00915598	0.00254451	0.0017287	0.00123581	0.00324577	0.000914565
-204	0.00383154	0.0020661	0.00227729	0.00164138	0.00561988	0.00176485	0.00514025	0.00336711	0.0116601	0.00296978	0.00220336	0.00146461	0.00430107	0.0010827	0.000726674	0.00081499	0.00107719	0.00106574	0.0025288	0.00115034	0.00316352	0.00246264	0.00682017	0.00211745	0.00126943	0.000993249	0.00219573	0.000738887	0.00227911	0.00144054	0.00167724	0.00135356	0.00407434	0.00145759	0.00415188	0.00291487	0.00924015	0.00254361	0.0017364	0.00122893	0.0032484	0.000910794
-203	0.00375372	0.00203051	0.0022097	0.00160124	0.00564475	0.0017547	0.00520101	0.00337219	0.0117905	0.00295088	0.00221143	0.00145276	0.00429967	0.00107406	0.000727409	0.000828939	0.00106886	0.00107477	0.0025417	0.00114745	0.00317165	0.00247322	0.00683783	0.00212943	0.00126978	0.000990245	0.00220052	0.000737657	0.00224056	0.00142973	0.00163928	0.001338	0.00409322	0.00145107	0.00418633	0.00292271	0.00931418	0.00254015	0.00174061	0.0012215	0.00325009	0.00090586
-202	0.00363132	0.00198764	0.00212635	0.00156701	0.00566104	0.00174599	0.00527158	0.0033841	0.0119208	0.00293419	0.0022227	0.0014413	0.00429872	0.00106692	0.00072409	0.000833586	0.00105535	0.00108513	0.00255266	0.00114464	0.00317895	0.00248635	0.00686984	0.00213971	0.00126676	0.000987009	0.00220779	0.000737494	0.00217771	0.00141061	0.00159085	0.00132607	0.00410685	0.00144532	0.00422527	0.00293522	0.00939531	0.00253695	0.00174473	0.00121416	0.00325325	0.000902207
-201	0.00346656	0.00195099	0.00204441	0.00154817	0.00568197	0.00174223	0.00535454	0.00339889	0.0120607	0.00291603	0.00224315	0.00143333	0.00430097	0.00106155	0.000713834	0.000826994	0.00104279	0.00109436	0.00256686	0.00114348	0.0031879	0.00250019	0.00691367	0.00214872	0.00126308	0.000985499	0.00221739	0.00073855	0.0020902	0.00138899	0.0015436	0.00132126	0.00412442	0.00144286	0.00427122	0.00294954	0.00948718	0.00253237	0.00175311	0.00120941	0.00325918	0.00090005
-200	0.00328325	0.00193986	0.00196955	0.00155295	0.00569901	0.00174512	0.00543732	0.00341637	0.0121847	0.00290003	0.00226799	0.00143057	0.00430534	0.00105649	0.000697578	0.000816553	0.0010335	0.00110012	0.0025874	0.00114448	0.00320001	0.00251494	0.0069513	0.00215853	0.00125786	0.000986462	0.00222649	0.000739538	0.00199041	0.00137821	0.00150153	0.00132653	0.0041432	0.0014448	0.00431867	0.00296566	0.00956798	0.00252928	0.00176292	0.00120851	0.00326591	0.000898012
-199	0.00310759	0.00193474	0.00189854	0.00157168	0.00569193	0.0017514	0.00551265	0.00343874	0.0122794	0.0028918	0.00229201	0.00143047	0.00431574	0.00105223	0.000683773	0.000805392	0.00102617	0.00110475	0.00261004	0.00114681	0.00321539	0.00253296	0.00698343	0.00216948	0.00125253	0.000988509	0.00223763	0.000741111	0.00189568	0.00137007	0.00146235	0.00133821	0.00415099	0.0014491	0.00436402	0.00298585	0.00963139	0.00253064	0.00177227	0.00120949	0.00327669	0.000896671
-198	0.00294863	0.00192478	0.00183636	0.00158869	0.00566793	0.0017591	0.00558256	0.00345884	0.0123481	0.00288835	0.00231413	0.00143119	0.00432584	0.00104954	0.000672399	0.000793132	0.00102222	0.00110859	0.00263217	0.0011504	0.0032316	0.00255083	0.00701851	0.00218018	0.00124644	0.000991284	0.00225139	0.000743505	0.00181051	0.00135895	0.00142929	0.00134864	0.00415005	0.00145475	0.00440708	0.00300484	0.00968331	0.00253426	0.00178029	0.00121124	0.00328861	0.000896524
-197	0.00281773	0.0019181	0.00178588	0.00160352	0.00564057	0.00177032	0.00565099	0.00347276	0.0124331	0.00288339	0.00233583	0.00143324	0.0043302	0.00104746	0.000664213	0.000784026	0.00102051	0.00111217	0.00265277	0.00115648	0.0032473	0.00256698	0.00706506	0.00219086	0.00123939	0.00099538	0.00226686	0.000746741	0.00174097	0.00135106	0.00140319	0.00135784	0.00414667	0.0014634	0.00444914	0.00301987	0.0097491	0.00253713	0.00178761	0.00121431	0.00329853	0.000897101
-196	0.00270715	0.00191611	0.00174893	0.00161947	0.00559293	0.00178584	0.0057171	0.00348379	0.0125204	0.00287635	0.00235827	0.0014356	0.00432645	0.00104628	0.000657445	0.000777983	0.00101895	0.00111567	0.00266665	0.00116504	0.00326244	0.00258276	0.00711886	0.00220171	0.00123254	0.00100018	0.00228309	0.000751317	0.0016823	0.00134705	0.00138394	0.00136757	0.00412979	0.00147544	0.00448977	0.00303328	0.00981961	0.00253903	0.00179541	0.00121789	0.00330477	0.000898798
-195	0.0026459	0.00190852	0.00173091	0.00163557	0.00552591	0.0018083	0.00578841	0.00349413	0.0125844	0.00287521	0.00238388	0.00143947	0.0043205	0.00104845	0.000651418	0.000767436	0.00101686	0.00111827	0.0026655	0.00117792	0.00327468	0.00260008	0.00717017	0.00221268	0.00122573	0.00100566	0.00230106	0.00075717	0.00164866	0.00133798	0.00137389	0.00137692	0.0040957	0.00149311	0.00453155	0.00304711	0.00987729	0.00254394	0.00180481	0.00122257	0.00331078	0.000902811
-194	0.00262489	0.00190336	0.00173166	0.00165452	0.0054815	0.00183716	0.00586404	0.00350752	0.0126542	0.0028876	0.00241106	0.00144704	0.00431357	0.00105626	0.000648067	0.000755632	0.00101744	0.0011198	0.00266741	0.00119487	0.00328447	0.00261845	0.00722428	0.00222308	0.00122056	0.00101236	0.00231715	0.000764187	0.00163648	0.00132949	0.00137455	0.00138716	0.00407445	0.00151601	0.00457426	0.00306298	0.00993922	0.00255534	0.00181581	0.0012297	0.00331536	0.000910224
-193	0.00260374	0.00191293	0.00174408	0.00167786	0.00548342	0.00186997	0.00592679	0.00352579	0.0127396	0.00291166	0.00243638	0.00145651	0.00430991	0.00106621	0.000647276	0.00074981	0.00102169	0.0011203	0.00268836	0.00121493	0.00329247	0.00263579	0.00728385	0.00223402	0.00122043	0.00101918	0.00233446	0.000770825	0.00162551	0.00133137	0.00138289	0.00139908	0.00408589	0.00154245	0.00460963	0.00308079	0.0100117	0.00257284	0.0018284	0.00123784	0.00332219	0.000918518
-192	0.00259125	0.00193524	0.00177126	0.00169755	0.00553919	0.00190301	0.00595951	0.00354566	0.012832	0.00294069	0.00245277	0.00146772	0.00430704	0.00107484	0.00064385	0.000753966	0.00103007	0.00111848	0.00272841	0.00123595	0.0033036	0.00265197	0.00734567	0.00224612	0.00122415	0.0010267	0.00235596	0.000775864	0.00161755	0.0013446	0.00140066	0.00140802	0.0041338	0.00156948	0.00463155	0.00309882	0.0100888	0.0025934	0.00183846	0.00124721	0.0033315	0.000925351
-191	0.0025885	0.00196252	0.00180401	0.00171016	0.00562568	0.00193165	0.00596455	0.00356563	0.0129319	0.00297179	0.00245049	0.00147944	0.00430562	0.00108219	0.000639773	0.0007654	0.00103962	0.00111391	0.00277787	0.00125445	0.00332215	0.00266803	0.00740946	0.0022593	0.00122906	0.00103475	0.0023768	0.000779765	0.00161413	0.00136396	0.00142182	0.00141203	0.00420177	0.00159305	0.00464335	0.00311683	0.0101707	0.00261555	0.00183978	0.00125709	0.00334121	0.000930977
-190	0.00257654	0.00199591	0.00183446	0.00172066	0.00571756	0.00195617	0.00596685	0.00358419	0.0130565	0.00300375	0.00243552	0.00148978	0.00431709	0.00108992	0.000631376	0.000780957	0.00104807	0.0011093	0.00282449	0.00127141	0.00334661	0.00268368	0.00748195	0.00227319	0.00123479	0.0010415	0.00239919	0.000783885	0.00160396	0.00138843	0.00144126	0.00141498	0.00427103	0.00161379	0.00465673	0.00313393	0.0102692	0.00263847	0.00183516	0.00126564	0.00335814	0.000936903
-189	0.00254436	0.00204318	0.00186098	0.00173431	0.0058172	0.00197854	0.00598225	0.00359905	0.0132064	0.00303189	0.00242377	0.00150005	0.00434115	0.00109901	0.000616437	0.000802632	0.00105557	0.00110621	0.002865	0.00128823	0.00337382	0.00269715	0.00756815	0.00228675	0.0012432	0.00104775	0.00242596	0.00078881	0.0015804	0.00142291	0.00145828	0.00142026	0.0043411	0.00163339	0.00467804	0.0031481	0.0103873	0.00265932	0.00183348	0.0012739	0.00338356	0.000943909
-188	0.00249607	0.00209912	0.00188176	0.00175354	0.00592494	0.00200377	0.0060085	0.0036165	0.0133748	0.00305744	0.00242115	0.0015112	0.00437491	0.00110905	0.000598682	0.00082783	0.00106096	0.00110548	0.00290039	0.00130654	0.00339963	0.00271168	0.00766092	0.00230063	0.00125539	0.00105418	0.0024551	0.000794874	0.00154738	0.00146347	0.00147136	0.00142951	0.00441267	0.00165516	0.00470407	0.00316409	0.0105179	0.00267904	0.00183827	0.00128269	0.003415	0.000951961
-187	0.00241594	0.00214838	0.00189803	0.00177578	0.00603651	0.00203196	0.00604446	0.00363858	0.013532	0.00308263	0.00242385	0.00152274	0.00442279	0.00111905	0.000574411	0.000847372	0.00106649	0.00110544	0.00293408	0.00132663	0.00342322	0.00272801	0.00774706	0.00231396	0.00126909	0.00106046	0.00248848	0.000800983	0.00149518	0.00149788	0.00148226	0.00144061	0.00448529	0.00167929	0.00473384	0.00318329	0.0106395	0.0026983	0.00184647	0.0012916	0.00345563	0.000960017
-186	0.00230982	0.00218814	0.00191375	0.00179803	0.00615487	0.00205647	0.00608933	0.00365908	0.0136792	0.00310594	0.00242718	0.00153461	0.00448724	0.00112838	0.000544485	0.000859701	0.00107418	0.00110625	0.00297033	0.0013448	0.00344732	0.00274241	0.00782619	0.00232563	0.0012835	0.00106676	0.00252436	0.000806143	0.00142715	0.00152392	0.00149396	0.00145214	0.0045626	0.00170063	0.00476832	0.00320075	0.0107527	0.00271579	0.00185534	0.00130069	0.0035058	0.000967261
-185	0.00218995	0.00223008	0.00192909	0.00182058	0.00628901	0.00207144	0.00612485	0.00367863	0.0138192	0.00312521	0.00242773	0.00154614	0.00455474	0.00113527	0.000510402	0.000873855	0.00108196	0.00110867	0.00301632	0.00135789	0.00347515	0.00275471	0.00790101	0.00233611	0.00129915	0.00107225	0.00255843	0.000809674	0.00135017	0.00155197	0.00150553	0.00146462	0.00465267	0.00171466	0.0048	0.00321667	0.0108601	0.00273066	0.00186344	0.0013092	0.00355658	0.000972471
-184	0.00207507	0.00227282	0.00194082	0.00183879	0.00642828	0.00208066	0.00614757	0.00369736	0.0139322	0.00313929	0.00242475	0.00155684	0.00462243	0.00113903	0.000475703	0.000888583	0.00108672	0.00111233	0.00307069	0.00136819	0.00350672	0.00276528	0.00796997	0.00234515	0.00131331	0.00107692	0.00259359	0.000811528	0.00127539	0.0015807	0.00151377	0.00147556	0.00474949	0.00172443	0.00482714	0.00323132	0.0109511	0.00274222	0.00186903	0.00131688	0.00360801	0.000975277
-183	0.00200006	0.00229702	0.00195299	0.00185203	0.00654694	0.00208642	0.0061768	0.00370666	0.014035	0.00314283	0.00241924	0.00156863	0.00469109	0.00114307	0.000441319	0.000899398	0.00108858	0.001118	0.00312012	0.00137565	0.00354174	0.00277324	0.00803739	0.0023536	0.00132191	0.00108383	0.00262643	0.000814724	0.00122069	0.00159821	0.00152079	0.00148502	0.00483353	0.00173104	0.00485927	0.00323995	0.0110362	0.00274822	0.00187058	0.00132623	0.00365876	0.000978898
-182	0.00195793	0.00232583	0.00196402	0.00188908	0.00662731	0.00209393	0.00622235	0.00370746	0.014132	0.00313691	0.00241831	0.00157974	0.00476072	0.00114863	0.000407298	0.000891707	0.00108807	0.00111924	0.00316079	0.00138168	0.00357449	0.00277958	0.00809303	0.0023618	0.00132644	0.00109172	0.00265187	0.000819818	0.00118261	0.00160877	0.00152605	0.00150416	0.00489405	0.0017378	0.00489842	0.00324352	0.0111125	0.00274935	0.00187237	0.00133573	0.00370629	0.000984225
-181	0.00193238	0.00239516	0.0019765	0.00196816	0.00667954	0.00210847	0.00627276	0.0037034	0.0141898	0.00312679	0.00242655	0.00159068	0.0048271	0.00115536	0.000377823	0.000858608	0.00108529	0.00110956	0.00319568	0.00138738	0.00359697	0.00278317	0.00812837	0.00236771	0.00132952	0.00109912	0.0026763	0.000825408	0.0011551	0.00162689	0.0015309	0.00153886	0.00493761	0.00174793	0.00493487	0.00324329	0.0111591	0.00274725	0.00187803	0.0013449	0.0037517	0.000990385
-180	0.00193221	0.00248191	0.0019953	0.00206767	0.00671776	0.00212493	0.00630385	0.00369445	0.0141877	0.00311338	0.00243861	0.00160415	0.00487921	0.00116257	0.000355317	0.000812365	0.00108231	0.00109343	0.00322279	0.00139078	0.0036059	0.00278368	0.00814664	0.00237171	0.00133174	0.00110696	0.00269995	0.000831001	0.00114377	0.00164714	0.00153881	0.00158055	0.00497027	0.00175786	0.00495487	0.00323907	0.0111672	0.00274255	0.00188517	0.00135556	0.00378958	0.000996786
-179	0.00195208	0.00256272	0.00201738	0.00217112	0.00674693	0.00214123	0.00630139	0.00368399	0.0141197	0.00310065	0.00244088	0.00161609	0.00491497	0.00116883	0.000337666	0.000759562	0.00108046	0.0010743	0.00324983	0.0013938	0.00360714	0.00278325	0.00813919	0.00237564	0.0013286	0.00111306	0.00271664	0.000835875	0.00114488	0.00166114	0.00154892	0.00162271	0.00499838	0.00176751	0.00495427	0.00323362	0.0111294	0.00273815	0.00188474	0.00136457	0.00381581	0.00100235
-178	0.00198725	0.00264015	0.00204463	0.00228049	0.00680777	0.00215345	0.00627501	0.00366967	0.0140199	0.00308787	0.00243073	0.00162467	0.00493475	0.00117393	0.000324303	0.000699607	0.00107833	0.00105066	0.00327632	0.00139497	0.0036119	0.0027808	0.00811023	0.00237914	0.00132198	0.00111746	0.0027271	0.000839682	0.00115578	0.00166988	0.00156148	0.00166558	0.00504205	0.00177421	0.00494346	0.00322523	0.011065	0.00273351	0.00187636	0.00137107	0.00383092	0.0010068
-177	0.00205829	0.00273705	0.00207613	0.00240416	0.00689329	0.00216281	0.00622974	0.00365144	0.0139249	0.00307625	0.00241435	0.00163327	0.00493884	0.00117895	0.000321879	0.000637599	0.0010739	0.00102413	0.0032915	0.00139423	0.0036204	0.00277651	0.00807135	0.00238351	0.00131591	0.00112194	0.00272978	0.000843033	0.00119009	0.00168733	0.00157502	0.00171415	0.0050924	0.00177852	0.00492507	0.00321397	0.0109981	0.00272988	0.00186513	0.0013776	0.00383431	0.00101099
-176	0.0021699	0.00286624	0.00210885	0.00253912	0.00697129	0.00217731	0.00617295	0.00363475	0.0138346	0.00306674	0.00239751	0.00164266	0.00493238	0.00118484	0.000331002	0.000576662	0.00106667	0.000995007	0.00329702	0.00139672	0.00362942	0.00277372	0.00802982	0.00238977	0.00130996	0.00112632	0.00272723	0.000846812	0.00125045	0.00172145	0.00158776	0.00176706	0.00513416	0.00178702	0.00490119	0.00320424	0.0109322	0.00272825	0.00185373	0.00138449	0.00382981	0.00101583
-175	0.00231023	0.00300658	0.00214415	0.00267175	0.00704944	0.00219836	0.00612144	0.00361774	0.013765	0.00305773	0.00238358	0.00165153	0.00492576	0.00119201	0.000348717	0.00051287	0.00105824	0.000963255	0.00329581	0.00140342	0.00363814	0.00277043	0.00799456	0.0023958	0.00130487	0.00113043	0.00272425	0.000851373	0.00132947	0.00175972	0.00160119	0.0018175	0.00517262	0.00180089	0.00487979	0.00319408	0.0108798	0.00272677	0.00184422	0.00139098	0.00382501	0.00102169
-174	0.00246499	0.00313973	0.0021833	0.00279667	0.0071284	0.00222431	0.00607832	0.0036036	0.0137159	0.00305258	0.00237553	0.00166154	0.00491527	0.00120133	0.000368152	0.000449368	0.00105117	0.000930425	0.00328396	0.00141043	0.00364414	0.00276827	0.00796283	0.00240302	0.00130283	0.00113529	0.00271593	0.000856915	0.00141657	0.00179455	0.00161723	0.00186355	0.00520618	0.00181737	0.00486123	0.00318594	0.0108393	0.0027278	0.00183918	0.00139842	0.0038156	0.00102912
-173	0.00259847	0.00327889	0.00221905	0.00291343	0.00721265	0.00225524	0.00603509	0.0036011	0.0136563	0.00305581	0.00237287	0.00166969	0.00490213	0.001211	0.000390012	0.000388679	0.00104636	0.00089598	0.00326782	0.00141824	0.00364698	0.00277247	0.00792097	0.00241175	0.00130632	0.00113783	0.00270502	0.000861779	0.00149424	0.00183378	0.0016327	0.00190471	0.00524023	0.00183674	0.00484103	0.00318679	0.0107886	0.00273378	0.00183959	0.00140376	0.00380358	0.00103639
-172	0.00270925	0.00337611	0.00224367	0.00298331	0.00729735	0.00228466	0.00598733	0.00360869	0.0135757	0.0030681	0.00237052	0.00167587	0.00488184	0.00122092	0.000418516	0.000354246	0.00104228	0.000873111	0.00324399	0.00142889	0.00365015	0.00278132	0.00787448	0.00242212	0.00131381	0.00113814	0.0026961	0.000866272	0.00156388	0.00186518	0.00164298	0.00192821	0.00527067	0.00185677	0.00481874	0.003195	0.0107251	0.00274511	0.00184217	0.00140701	0.00378897	0.00104359
-171	0.00281345	0.00338307	0.00225555	0.0029751	0.00739506	0.00230583	0.00596087	0.0036292	0.0135403	0.00308789	0.00237543	0.00168268	0.00485733	0.00123307	0.000446966	0.000359973	0.00103842	0.000874819	0.00320397	0.00144399	0.00365748	0.00279462	0.00783397	0.00243626	0.00132423	0.00113909	0.00268572	0.000872189	0.00163021	0.00187152	0.00164699	0.00192496	0.00529952	0.00187491	0.00480918	0.00321191	0.0106872	0.00276208	0.00184983	0.00141089	0.00377152	0.00105263
-170	0.00290794	0.00335509	0.00225589	0.00292906	0.00752997	0.00232572	0.0059727	0.00366509	0.0136068	0.00311398	0.00238984	0.00168775	0.00484212	0.00124602	0.000475004	0.000380922	0.00103247	0.000888444	0.00316045	0.00146285	0.00367197	0.00281359	0.00779799	0.00245287	0.00133753	0.00114157	0.00267483	0.000878805	0.00169147	0.00186801	0.00164418	0.00190875	0.00534521	0.00189429	0.00482233	0.00323934	0.0107024	0.00278343	0.00186368	0.00141466	0.00375847	0.00106241
-169	0.00299596	0.0033348	0.002257	0.00287299	0.0077165	0.00234698	0.00601313	0.0037102	0.0137594	0.00314539	0.00241139	0.00169578	0.00483817	0.00125995	0.000502577	0.000403797	0.00102385	0.000904907	0.00311165	0.00148095	0.00369116	0.00283689	0.00777517	0.00247051	0.00135461	0.00114844	0.00266692	0.00088649	0.00174927	0.0018693	0.00164043	0.00188895	0.00541408	0.00191396	0.00485214	0.00327354	0.0107673	0.00280795	0.001883	0.00142211	0.00375254	0.00107322
-168	0.00307557	0.00331695	0.00225618	0.00280092	0.00791738	0.00236908	0.00606301	0.00376168	0.0139274	0.00317995	0.00243871	0.00170967	0.00484924	0.00127462	0.00052612	0.000434745	0.00101628	0.000926505	0.00307409	0.00149886	0.0037103	0.0028634	0.00777124	0.00248838	0.00137383	0.00115898	0.00266278	0.000894407	0.00180085	0.00187585	0.00163623	0.00186371	0.00549574	0.00193397	0.00488665	0.00331254	0.0108493	0.00283416	0.00190627	0.00143432	0.00375601	0.00108452
-167	0.00314085	0.00327388	0.00225366	0.00270476	0.00812372	0.00238681	0.00611511	0.00381769	0.0140842	0.00321416	0.00246659	0.00172349	0.00487667	0.00128838	0.000541613	0.000474299	0.00101248	0.00095234	0.00306781	0.00151331	0.00372885	0.00289201	0.00778263	0.0025053	0.00139189	0.00116975	0.00266481	0.000901769	0.00184123	0.00187409	0.00163307	0.00182855	0.00559576	0.00195006	0.00492198	0.00335485	0.0109334	0.00285973	0.00192924	0.00144662	0.00377074	0.00109507
-166	0.00316893	0.00321102	0.00224712	0.00259672	0.00834615	0.00239596	0.00616529	0.00387923	0.014248	0.00325019	0.00249174	0.00173485	0.00491751	0.0013005	0.000544888	0.000516687	0.00101136	0.000980024	0.00307716	0.00152193	0.00374421	0.00292252	0.00779711	0.00252241	0.0014083	0.00117979	0.00267238	0.000908365	0.00185691	0.00186385	0.00162924	0.00178837	0.00571165	0.00195894	0.00495475	0.00340088	0.0110226	0.0028863	0.00195002	0.00145732	0.00379494	0.00110443
-165	0.00315357	0.0031769	0.00223039	0.00250413	0.00855439	0.00240449	0.00620946	0.0039489	0.0143951	0.00329029	0.00251484	0.00174545	0.00495939	0.00131268	0.000536516	0.000557889	0.00101074	0.00100575	0.00309047	0.00152872	0.00375567	0.0029572	0.00780157	0.00254154	0.00142358	0.00118975	0.00268033	0.000915153	0.00184504	0.00186739	0.00162057	0.00175494	0.00582243	0.00196661	0.00498256	0.00345305	0.0110983	0.00291592	0.00196921	0.0014676	0.00381986	0.00111391
-164	0.00309959	0.00317653	0.00220374	0.00243126	0.00874438	0.00240926	0.00625624	0.0040189	0.0145386	0.00332925	0.00253539	0.00175372	0.00500153	0.00132489	0.000524565	0.000596869	0.00100897	0.00102826	0.00310776	0.00153593	0.00376908	0.00299192	0.00780125	0.00256002	0.00143745	0.00119837	0.00269069	0.000922657	0.00181208	0.0018867	0.00160636	0.00172976	0.00592607	0.00197259	0.00501266	0.00350541	0.0111699	0.00294463	0.00198642	0.00147604	0.00384611	0.00112377
-163	0.0030143	0.00318597	0.00216655	0.0023695	0.00890383	0.00240658	0.00631268	0.00408157	0.0147004	0.00336474	0.00255435	0.00176349	0.00504332	0.00133674	0.000514293	0.000633146	0.00100612	0.00104889	0.00311858	0.00154345	0.00378553	0.00302078	0.0078108	0.00257711	0.00144816	0.00120837	0.00270344	0.000930746	0.0017643	0.00190956	0.00158633	0.00170919	0.0060112	0.00197502	0.0050491	0.00355117	0.0112556	0.00297093	0.00200126	0.00148593	0.00387338	0.00113374
-162	0.00291689	0.00322472	0.00213193	0.00233009	0.00905458	0.00240064	0.00638421	0.00413629	0.0148877	0.00339364	0.00257484	0.00177511	0.00508913	0.00134753	0.00050015	0.00065626	0.00100371	0.00106185	0.00313251	0.0015477	0.00380515	0.00304526	0.00784374	0.00259202	0.00145736	0.00121992	0.00271685	0.00093861	0.00170852	0.00194049	0.00156782	0.00169597	0.00609354	0.00197417	0.00509468	0.00359077	0.0113657	0.00299283	0.0020161	0.00149752	0.00390299	0.00114307
-161	0.00282396	0.00331303	0.00210715	0.00232598	0.00920138	0.00239571	0.0064512	0.00417666	0.0150615	0.00341483	0.00259248	0.00178284	0.00514558	0.0013542	0.000484792	0.000661401	0.00100302	0.00106071	0.00318421	0.00154723	0.0038354	0.00306672	0.00791024	0.00260361	0.001467	0.00122944	0.00273393	0.000944534	0.00165438	0.00198722	0.00155509	0.00169334	0.00619279	0.00197147	0.0051433	0.00362169	0.0114858	0.00300922	0.00202974	0.00150614	0.00393975	0.00114937
-160	0.00273085	0.00340434	0.0020893	0.00233465	0.00931965	0.00238967	0.00650295	0.0042017	0.0151658	0.00343046	0.00260941	0.00178903	0.00520883	0.00135906	0.000469386	0.000662814	0.00100573	0.00105345	0.00327003	0.00154574	0.00387828	0.00308441	0.00801325	0.00261438	0.00147685	0.00123707	0.00275893	0.000949966	0.00160012	0.00203358	0.00154751	0.00169405	0.00629484	0.00196771	0.00519062	0.00364306	0.0115895	0.00302242	0.00204313	0.00151305	0.00398388	0.00115452
-159	0.00263426	0.00347439	0.00206597	0.00234156	0.00936038	0.00238203	0.00655614	0.00421927	0.0152262	0.00344066	0.00263068	0.00179343	0.00528114	0.00136381	0.000453475	0.000666999	0.00101174	0.0010448	0.00337341	0.00154514	0.0039285	0.00309838	0.00814294	0.00262522	0.0014885	0.00124162	0.00279401	0.000955246	0.00154387	0.0020707	0.00153885	0.00169318	0.0063669	0.00196359	0.00524232	0.00365883	0.0116846	0.00303294	0.00205959	0.00151753	0.00403758	0.00115953
-158	0.0025373	0.00353059	0.00203475	0.00234858	0.00929187	0.0023752	0.00662068	0.00423407	0.0152806	0.00344875	0.00265206	0.001794	0.00535228	0.0013679	0.000439592	0.000666396	0.00101803	0.00103263	0.00347614	0.00154483	0.00398133	0.00310994	0.00828057	0.00263679	0.00150031	0.00124301	0.00283284	0.000960718	0.00148845	0.00209849	0.00152639	0.0016906	0.00638401	0.00196001	0.00530101	0.003672	0.0117806	0.00304277	0.00207619	0.0015185	0.00409256	0.00116431
-157	0.0024324	0.00357718	0.00199416	0.0023513	0.00914362	0.00237613	0.00669668	0.00424742	0.0153315	0.00345587	0.00267492	0.0017945	0.00540996	0.00137306	0.000427612	0.000658044	0.00102128	0.00101751	0.00355754	0.00154926	0.00403627	0.00312	0.00841893	0.00264797	0.00151281	0.00124381	0.00287095	0.000967157	0.00143001	0.00211761	0.00150772	0.00168441	0.00635058	0.00196269	0.00536647	0.00368371	0.0118752	0.00305192	0.00209386	0.00151916	0.00414046	0.00117011
-156	0.00234703	0.00357664	0.00195067	0.00233476	0.00897285	0.00238392	0.00678115	0.00425144	0.0153698	0.00345734	0.00270167	0.00179699	0.00544675	0.00137995	0.000423769	0.000650454	0.00102271	0.00100212	0.00362999	0.00155697	0.00409399	0.00312594	0.00856285	0.00265556	0.00152672	0.00124545	0.00290657	0.000974697	0.0013854	0.00211355	0.00148669	0.00166844	0.00630142	0.00197045	0.00543757	0.00368869	0.0119663	0.00305645	0.0021142	0.00152122	0.00417666	0.00117732
-155	0.00228973	0.00347389	0.00191506	0.00228267	0.00881989	0.00238791	0.00686609	0.00424362	0.0154102	0.00345208	0.00272638	0.0018008	0.00547075	0.00138618	0.000427402	0.000649753	0.00102439	0.00099268	0.00370576	0.00156395	0.00415118	0.00312651	0.00871485	0.00265909	0.00153907	0.0012478	0.0029396	0.000981609	0.00135857	0.00206182	0.00146972	0.00163768	0.00626282	0.00197593	0.00550864	0.00368506	0.0120625	0.00305559	0.00213272	0.0015243	0.00420518	0.0011839
-154	0.00225497	0.00330426	0.00188804	0.00220389	0.00867566	0.00239252	0.00693606	0.00423271	0.0154337	0.00344728	0.00274436	0.00180613	0.0054928	0.00139052	0.000434063	0.000650292	0.00102706	0.000989335	0.00377846	0.00157224	0.00420274	0.00312593	0.00886146	0.00266098	0.00154827	0.00125111	0.0029728	0.000986493	0.00134452	0.00197728	0.00145755	0.00159661	0.00622706	0.00198238	0.0055694	0.00367932	0.0121476	0.00305413	0.00214631	0.00152862	0.0042328	0.00118851
-153	0.00224968	0.0031136	0.00187265	0.00211647	0.00854435	0.00240189	0.00699332	0.00422205	0.0154458	0.00344446	0.00275745	0.00180973	0.00551796	0.00139334	0.000441855	0.000650795	0.00103066	0.00098934	0.00385453	0.00158164	0.00424749	0.00312655	0.00899535	0.00266171	0.0015574	0.0012531	0.00300604	0.000989674	0.00134577	0.0018822	0.00145165	0.0015529	0.00619944	0.00199177	0.0056204	0.0036743	0.0122206	0.00305309	0.00215742	0.00153141	0.004262	0.00119151
-152	0.0022515	0.00291801	0.00185913	0.00202937	0.00841158	0.0024165	0.00703708	0.00421347	0.015459	0.00344478	0.00276401	0.00181141	0.00554422	0.0013954	0.000449474	0.000651869	0.00103382	0.000992016	0.00393066	0.0015938	0.00428321	0.00312728	0.00910974	0.00266182	0.00156591	0.00125314	0.00303983	0.000991936	0.00135049	0.00178494	0.00144648	0.00151069	0.00617112	0.00200515	0.00566014	0.00367038	0.0122844	0.0030533	0.00216496	0.00153227	0.00429203	0.00119367
-151	0.00223538	0.00271973	0.00183565	0.00194837	0.00824147	0.00243659	0.00705443	0.00421076	0.0154354	0.00345077	0.0027572	0.00181666	0.00554873	0.00139851	0.00045246	0.000650389	0.00103379	0.000996587	0.0039691	0.00160996	0.00429913	0.00312784	0.0091835	0.00266144	0.00156998	0.00125508	0.00306726	0.000994825	0.00134392	0.00168506	0.00143472	0.00147248	0.00610528	0.00202328	0.00567678	0.0036693	0.0123094	0.00305611	0.00216359	0.00153587	0.00430799	0.00119667
-150	0.00221855	0.00253222	0.00180511	0.00187327	0.0080382	0.00245946	0.00704556	0.00421359	0.0153665	0.00346134	0.00273528	0.00182404	0.00552102	0.00140219	0.000454881	0.000644819	0.00103034	0.00100175	0.00396835	0.00162682	0.00429323	0.00312876	0.00920752	0.00265738	0.0015693	0.00125837	0.00307801	0.000997271	0.00133672	0.00158852	0.00141772	0.00143751	0.00600327	0.00204314	0.00566939	0.00367117	0.012287	0.00305936	0.00215229	0.0015412	0.00429952	0.00119973
-149	0.00220965	0.00235859	0.00177647	0.00180178	0.00787246	0.00248119	0.00701918	0.00421968	0.0152728	0.00347584	0.00270435	0.00183284	0.00546658	0.00140527	0.000459164	0.000636873	0.00102449	0.00100783	0.00396334	0.00164345	0.00427485	0.00313038	0.00919783	0.00264998	0.001563	0.00126273	0.00307248	0.000998269	0.00133441	0.00149773	0.00140048	0.00140481	0.0059179	0.00206232	0.00564702	0.00367503	0.0122353	0.00306291	0.00213367	0.00154778	0.00426953	0.00120177
-148	0.00220272	0.00219925	0.00175306	0.00173678	0.00779683	0.00250257	0.00698556	0.00422759	0.015196	0.00349298	0.00267533	0.00184523	0.00540255	0.00140842	0.000462377	0.000629645	0.00101691	0.00101572	0.00396271	0.00166064	0.00425009	0.00313322	0.00918047	0.0026422	0.00155549	0.00127014	0.00306129	0.000998584	0.00133255	0.00141445	0.00138499	0.00137625	0.00587977	0.00208161	0.00561783	0.00368041	0.0121882	0.00306759	0.00211541	0.00155768	0.00423192	0.0012035
-147	0.00220235	0.00206896	0.00173789	0.00168568	0.00781063	0.00251882	0.00695806	0.0042365	0.0151603	0.0035154	0.00265408	0.00185754	0.00534955	0.0014109	0.000466162	0.000625879	0.00100964	0.00102516	0.00397237	0.00167651	0.00422325	0.00313759	0.00916792	0.00263533	0.00155004	0.00127783	0.00305084	0.00099816	0.00133425	0.00134742	0.00137376	0.00135542	0.0058915	0.00209767	0.00559066	0.00368704	0.0121641	0.00307537	0.00210206	0.00156769	0.00420019	0.00120453
-146	0.00218826	0.0019885	0.00172753	0.0016575	0.00788349	0.00253117	0.00694336	0.00425403	0.0151593	0.00355167	0.00263852	0.00186802	0.00532087	0.00141308	0.00046546	0.000622376	0.001002	0.00103583	0.00398339	0.00169262	0.00419875	0.00314493	0.009157	0.00263043	0.00154575	0.0012844	0.00304126	0.000996557	0.00132686	0.00130544	0.00136477	0.00134667	0.00593344	0.0021119	0.00557106	0.00369948	0.0121581	0.00309105	0.00209214	0.00157621	0.00418107	0.00120482
-145	0.00216281	0.0019793	0.00171605	0.00165375	0.0079843	0.0025464	0.00694897	0.00428116	0.0151837	0.00360035	0.00263067	0.00188057	0.00531941	0.00141648	0.000462797	0.000618395	0.000994163	0.00104448	0.00399614	0.00171018	0.00418152	0.0031554	0.00915423	0.00262878	0.00154456	0.0012925	0.00303505	0.000995677	0.0013128	0.00129885	0.00135511	0.00134912	0.00599022	0.00212829	0.00556524	0.00371828	0.012169	0.00311457	0.00208762	0.00158653	0.00417723	0.00120608
-144	0.00213572	0.00201085	0.00170688	0.0016637	0.00812055	0.00256009	0.00698577	0.00430866	0.0152511	0.00364594	0.00263664	0.00189408	0.00534469	0.00142068	0.000459079	0.000617144	0.000988975	0.00104998	0.00402621	0.00172552	0.00417494	0.00316626	0.00917977	0.00262939	0.00154945	0.00130155	0.00303454	0.00099669	0.0012974	0.00131399	0.00134793	0.00135684	0.00607338	0.0021428	0.00558036	0.00373746	0.0122154	0.00313766	0.00209304	0.00159781	0.00418961	0.00120869
-143	0.00210038	0.00205211	0.00170437	0.00167665	0.00831708	0.00257234	0.00703353	0.00433795	0.0153342	0.00368632	0.00265358	0.00190731	0.0053928	0.00142594	0.00045085	0.000616134	0.00098685	0.00105306	0.00407959	0.00173976	0.00418167	0.00317861	0.00923174	0.00263119	0.00155876	0.00131081	0.00304407	0.000999427	0.00127561	0.00133412	0.00134561	0.00136485	0.00619834	0.00215605	0.0056076	0.00375828	0.012283	0.00315876	0.00210617	0.00160906	0.00421844	0.00121268
-142	0.0020651	0.00209524	0.00170786	0.00169155	0.00855995	0.00258368	0.00708029	0.00436934	0.0153906	0.00372513	0.00267632	0.00192211	0.0054501	0.0014323	0.000442307	0.000613929	0.000986213	0.00105406	0.00415237	0.00175396	0.0041994	0.00319412	0.00929488	0.00263518	0.00156886	0.00132186	0.00305915	0.00100365	0.0012537	0.00135459	0.00134704	0.0013728	0.00635616	0.00216882	0.00563985	0.00378173	0.0123427	0.00318015	0.00212259	0.00162199	0.00425462	0.00121797
-141	0.00204434	0.00215316	0.00172092	0.0017068	0.0088471	0.00259689	0.00714379	0.00439893	0.0154712	0.00375898	0.00271148	0.00193561	0.00552639	0.00143873	0.00043948	0.000613618	0.000989152	0.0010544	0.00424804	0.00176672	0.00422804	0.00321149	0.00937854	0.00264147	0.00158208	0.00133233	0.00307996	0.00100759	0.00124191	0.00138339	0.00135504	0.0013806	0.00654757	0.0021818	0.00568592	0.00380521	0.0124248	0.00320022	0.00214678	0.00163397	0.00430318	0.00122316
-140	0.00201452	0.00222489	0.00174079	0.00172437	0.00917085	0.00261687	0.007231	0.00442597	0.0156222	0.00378601	0.0027601	0.00194772	0.00563505	0.00144416	0.000433802	0.000614691	0.000995962	0.0010535	0.00436072	0.0017794	0.00426898	0.0032297	0.00949567	0.00265231	0.00160101	0.00134139	0.00311184	0.00101143	0.00122416	0.00141979	0.00136838	0.00138894	0.00676579	0.00219813	0.00574999	0.00382783	0.0125589	0.00321916	0.00218056	0.00164455	0.00437345	0.00122779
-139	0.00197186	0.00230576	0.00176142	0.00174779	0.00947648	0.00265018	0.00733187	0.00445014	0.0158152	0.00381071	0.0028172	0.0019581	0.00578032	0.00145023	0.000424159	0.000612646	0.00100413	0.00104982	0.00446133	0.00179433	0.00431727	0.00324937	0.00962958	0.00266788	0.0016266	0.00134975	0.00315373	0.00101712	0.00119801	0.00145921	0.00138277	0.00139881	0.00696891	0.00222225	0.00582457	0.00384976	0.0127224	0.00323929	0.0022219	0.00165393	0.00446702	0.00123367
-138	0.00193186	0.00239197	0.00178323	0.00177264	0.00974053	0.00269163	0.00744034	0.00447524	0.015994	0.00383728	0.0028803	0.00196672	0.00596749	0.00145915	0.00041536	0.000613606	0.00101348	0.00104369	0.0045457	0.00181136	0.00437241	0.0032708	0.00975704	0.00268502	0.00165691	0.00135541	0.00320501	0.00102491	0.00117361	0.00150279	0.00139835	0.00140816	0.00714312	0.0022515	0.00590638	0.00387302	0.0128755	0.00326115	0.00226861	0.00166107	0.00458625	0.00124203
-137	0.00189377	0.00246197	0.00180434	0.00179546	0.00994131	0.00273887	0.00755112	0.00450335	0.0161348	0.00385968	0.00294335	0.0019782	0.00617393	0.00147092	0.0004081	0.000617466	0.00102378	0.00103732	0.00461906	0.00183184	0.00442978	0.00329346	0.00987193	0.00270509	0.00168808	0.00136158	0.00325689	0.00103499	0.00115094	0.00153972	0.00141406	0.00141639	0.00728018	0.00228535	0.00599045	0.0038984	0.0130033	0.00328238	0.00231572	0.00166989	0.00471541	0.00125296
-136	0.00186644	0.00251741	0.00182455	0.00181655	0.0100595	0.00279668	0.00766161	0.00452614	0.0162566	0.00386683	0.00301428	0.00199141	0.00642753	0.00148277	0.000405926	0.000621205	0.00103576	0.00103238	0.00469706	0.00185649	0.00448432	0.00331704	0.00998427	0.00273063	0.0017182	0.00136966	0.00329401	0.00104747	0.00113618	0.00156931	0.00143016	0.00142447	0.00737829	0.00232658	0.00607297	0.00392159	0.0131204	0.00329873	0.00236624	0.00168054	0.00486077	0.00126512
-135	0.00184906	0.00255857	0.00184549	0.00183561	0.0101271	0.0028603	0.00776177	0.0045458	0.0163674	0.00386957	0.00309209	0.00199975	0.00671883	0.00149669	0.000405129	0.000622675	0.00104932	0.00102843	0.00477295	0.00188294	0.00453548	0.00334174	0.0100903	0.00275835	0.0017453	0.00137437	0.00331958	0.00106006	0.00112709	0.00159062	0.0014474	0.00143202	0.00745004	0.00237162	0.00614863	0.00394377	0.0132288	0.00331396	0.0024187	0.00168706	0.0050192	0.00127837
-134	0.0018472	0.00259185	0.00186101	0.00185665	0.0101527	0.00293011	0.00783402	0.00457154	0.0164494	0.00388789	0.00316193	0.00200504	0.00697758	0.001516	0.000406852	0.000620633	0.00105971	0.00102558	0.00483491	0.00191298	0.00457936	0.00336807	0.0101742	0.00278614	0.00176911	0.00137646	0.00333956	0.00107205	0.00112703	0.00160624	0.00146036	0.00144112	0.00749383	0.00242154	0.00620669	0.00396981	0.0133118	0.00333702	0.00246552	0.00169075	0.00515857	0.00129403
-133	0.00186419	0.00262375	0.00186104	0.00188073	0.0100846	0.00300213	0.00789013	0.00459883	0.016509	0.00391943	0.00322187	0.00201236	0.00719554	0.00153811	0.000414292	0.000618819	0.00106425	0.00102482	0.00486776	0.00194416	0.00461235	0.00339326	0.0102344	0.00281459	0.00178911	0.0013793	0.00334523	0.00108373	0.00113924	0.00162128	0.00146265	0.00145278	0.00747617	0.00247315	0.00625124	0.00399605	0.0133717	0.00336701	0.00250549	0.00169583	0.00527039	0.00131092
-132	0.0018918	0.00264773	0.00184965	0.00190392	0.0099383	0.00307501	0.00794488	0.00462448	0.0165762	0.00395806	0.00327949	0.00202086	0.00739972	0.00156185	0.000425229	0.000617576	0.00106519	0.00102589	0.00486416	0.00197603	0.00463927	0.00341566	0.0102806	0.0028425	0.0018081	0.00138289	0.00334489	0.00109478	0.00115851	0.00163265	0.00145742	0.00146491	0.00740123	0.00252552	0.00629207	0.00402007	0.0134284	0.00340028	0.00254379	0.00170188	0.0053723	0.00132831
-131	0.00191922	0.0026348	0.00183285	0.00191879	0.00977167	0.00314357	0.00800041	0.00465215	0.0166371	0.00400497	0.00333607	0.00203134	0.00761068	0.00158846	0.000435445	0.000616984	0.00106266	0.0010278	0.00484539	0.00201028	0.00466662	0.00343742	0.0103129	0.00286992	0.00182545	0.00138796	0.00334891	0.00110666	0.00117733	0.00162589	0.00144776	0.00147329	0.00730853	0.00257692	0.00633352	0.00404479	0.013475	0.00343744	0.00258076	0.00170965	0.00547979	0.00134756
-130	0.00196143	0.00258803	0.00181428	0.00192106	0.00960162	0.00320127	0.00805715	0.0046835	0.0166756	0.0040607	0.00338786	0.00204304	0.00782068	0.00161831	0.000450527	0.000622588	0.00105713	0.00103208	0.00482239	0.00204343	0.00469378	0.00346011	0.0103287	0.00289579	0.00183788	0.00139422	0.0033601	0.00111953	0.00120598	0.00160531	0.00143571	0.00147657	0.00721201	0.00262235	0.00637546	0.0040718	0.0135022	0.00347824	0.00261287	0.00171863	0.00559039	0.00136892
-129	0.00202122	0.00251524	0.00179678	0.00191134	0.00944635	0.00323943	0.00811392	0.00471749	0.0166994	0.0041154	0.00343643	0.00205505	0.00800585	0.00164799	0.000472341	0.000636752	0.0010509	0.00104016	0.00480652	0.00207216	0.00471978	0.00348342	0.0103395	0.00291936	0.0018452	0.00140124	0.00337412	0.00113138	0.00124678	0.001576	0.00142384	0.00147575	0.00712643	0.00265579	0.00641685	0.00410045	0.0135195	0.00351738	0.00264082	0.00172814	0.00568999	0.00138968
-128	0.00209116	0.00241527	0.00178359	0.00189512	0.00931096	0.00326404	0.00817096	0.00474858	0.0167398	0.00416399	0.00348072	0.00206355	0.00814614	0.00167553	0.000500346	0.000647196	0.00104574	0.00105031	0.00479931	0.00209849	0.00474151	0.0035048	0.0103588	0.00294148	0.00184651	0.00140918	0.00338187	0.00114222	0.00129575	0.00153124	0.00141466	0.00147272	0.00705514	0.00268127	0.00645624	0.00412669	0.0135493	0.00355273	0.00266361	0.00173636	0.005764	0.00140887
-127	0.00216368	0.00231255	0.00177538	0.00187587	0.00920184	0.00328502	0.00822026	0.004778	0.0168021	0.00421518	0.00352109	0.00206692	0.00825666	0.00170124	0.000527793	0.000651188	0.00104162	0.00105918	0.00479905	0.00212182	0.00476033	0.00352432	0.0103851	0.00296187	0.00184171	0.00141616	0.00338906	0.00115188	0.00134574	0.00148187	0.0014085	0.00146752	0.00700044	0.00270342	0.0064903	0.00415116	0.0135936	0.00358853	0.0026814	0.00174154	0.00582286	0.00142656
-126	0.00223295	0.00221101	0.00176795	0.00184903	0.00911956	0.00329489	0.00825546	0.00481518	0.0168656	0.00427504	0.00354268	0.00207016	0.00826215	0.00172686	0.0005495	0.000650424	0.00103732	0.00106403	0.00479134	0.00214045	0.0047765	0.00354478	0.0104098	0.00297903	0.00183361	0.00142238	0.00342477	0.00116005	0.00139123	0.00143072	0.00140263	0.00145653	0.00695545	0.00271767	0.00651598	0.00417998	0.0136377	0.00362703	0.00268814	0.00174627	0.00584346	0.00144346
-125	0.00230076	0.00211781	0.00175941	0.00181633	0.00903942	0.00330354	0.00829804	0.00485398	0.0169385	0.0043266	0.00355112	0.00207511	0.00817352	0.00174705	0.000571676	0.000647501	0.0010319	0.00106594	0.0047755	0.00215912	0.00478727	0.00356442	0.0104322	0.00299546	0.00182629	0.00143059	0.00348574	0.00116848	0.00143622	0.00138266	0.00139565	0.00144113	0.00690746	0.00273133	0.00654265	0.0042092	0.0136853	0.00366103	0.00268871	0.00175285	0.00582963	0.00145776
-124	0.00235313	0.00203192	0.00174993	0.00177955	0.00897121	0.00331853	0.00836344	0.00489044	0.017031	0.00436018	0.00356371	0.00208487	0.00810334	0.00176015	0.000591439	0.000646258	0.00102614	0.00106628	0.00476253	0.00217843	0.00479967	0.00358318	0.0104585	0.00301316	0.00181863	0.00144176	0.0035531	0.00117717	0.00147228	0.00133909	0.00138803	0.00142291	0.00686687	0.00274848	0.00658156	0.00423681	0.0137447	0.00368667	0.00269117	0.00176331	0.00582822	0.00146866
-123	0.00238985	0.00196525	0.00174621	0.00174242	0.00895924	0.00334345	0.00844297	0.00493473	0.0171608	0.00438771	0.00357842	0.00209888	0.00806195	0.00177362	0.000604672	0.000644753	0.00102156	0.00106442	0.00476544	0.00219707	0.00481897	0.00360502	0.0105039	0.00303101	0.00181083	0.00145399	0.00363276	0.00118646	0.00149726	0.001305	0.00138388	0.00140342	0.00686234	0.00277026	0.00663097	0.00426988	0.0138323	0.00370936	0.00269463	0.00177643	0.00584735	0.00148004
-122	0.00242411	0.00192162	0.0017504	0.00170608	0.00898977	0.00337205	0.00853417	0.00498992	0.0173234	0.00441465	0.00359536	0.0021136	0.00803095	0.00178813	0.000614333	0.000644504	0.00101902	0.00106133	0.00478785	0.00221169	0.00484227	0.00363049	0.0105684	0.00304766	0.00180487	0.00146542	0.00371464	0.00119614	0.00151922	0.00128306	0.00138471	0.00138371	0.00688881	0.00279187	0.00668822	0.0043102	0.0139459	0.00373115	0.00270011	0.00178951	0.00587279	0.00149214
-121	0.00246372	0.0019	0.00175947	0.0016724	0.00900794	0.00339682	0.00863829	0.00504789	0.0175112	0.00443645	0.00361676	0.00212718	0.00800119	0.00180006	0.000625057	0.000646046	0.00101912	0.00105759	0.00481199	0.0022216	0.00486791	0.00365716	0.0106466	0.00306401	0.00180382	0.00147606	0.00379468	0.00120537	0.00154439	0.00127302	0.0013893	0.00136499	0.00690997	0.00280921	0.0067531	0.00435252	0.0140789	0.00375023	0.00271029	0.00180162	0.00589794	0.00150272
-120	0.00250424	0.00189138	0.00177391	0.00164428	0.00903648	0.00342057	0.00875444	0.00510355	0.0177259	0.00445252	0.00365183	0.00214204	0.00799026	0.00181114	0.000636023	0.000641119	0.00102115	0.00105128	0.00484713	0.0022313	0.00489705	0.00368284	0.0107361	0.0030816	0.00181092	0.00148748	0.00387654	0.00121542	0.00157013	0.00126625	0.00139753	0.00134778	0.00694181	0.00282594	0.00682575	0.00439319	0.014231	0.00376706	0.00273137	0.00181476	0.0059334	0.00151328
-119	0.0025335	0.00189156	0.0017939	0.00162156	0.00911607	0.00345359	0.00888412	0.00515588	0.0179715	0.00447152	0.00369586	0.00215967	0.00800413	0.00182456	0.000642456	0.000629673	0.00102444	0.00104349	0.00490324	0.00224575	0.00493402	0.00370594	0.0108361	0.00309969	0.00182472	0.0014999	0.0039596	0.00122694	0.00158798	0.00126062	0.00140917	0.00133252	0.00700965	0.00284967	0.00690907	0.00443091	0.0144038	0.00378561	0.00276029	0.00182978	0.00598187	0.00152575
-118	0.00254235	0.00191106	0.00180811	0.00160361	0.00923472	0.00349696	0.00900703	0.00520507	0.0182116	0.00449548	0.0037373	0.00218051	0.0080307	0.00183836	0.000638908	0.000622148	0.00102655	0.00103658	0.00497356	0.00226234	0.00497905	0.00372868	0.0109413	0.00311714	0.00184462	0.00151328	0.00404737	0.00123815	0.00159063	0.0012666	0.00141733	0.00132009	0.00710414	0.00287965	0.00699304	0.00446688	0.0145765	0.00380631	0.00279096	0.0018469	0.00603903	0.00153826
-117	0.00254279	0.00193914	0.00181367	0.00158863	0.00935612	0.0035434	0.00910406	0.00524704	0.0184126	0.00451894	0.00376749	0.00220381	0.00805764	0.00185372	0.000631655	0.000619059	0.00102715	0.00103048	0.00504477	0.00227897	0.00502917	0.0037506	0.0110457	0.0031315	0.00187231	0.00152688	0.00414248	0.00124869	0.00158722	0.0012791	0.00142041	0.00130955	0.00720045	0.00291118	0.00706662	0.00449882	0.0147291	0.00382522	0.0028199	0.00186534	0.00610006	0.0015512
-116	0.00253949	0.00196727	0.00181599	0.00157648	0.00947677	0.00359289	0.00917072	0.00527985	0.0185597	0.00454541	0.00378667	0.00222934	0.00811715	0.00187436	0.000625751	0.000620092	0.00102556	0.00102431	0.00511467	0.00229518	0.00508598	0.00376809	0.0111444	0.00314082	0.00190684	0.00154058	0.0042342	0.00125915	0.00158262	0.00129368	0.00142078	0.0013004	0.00729572	0.00294404	0.00712835	0.00452397	0.014852	0.00384311	0.00284675	0.00188496	0.00617568	0.00156676
-115	0.00252338	0.00198497	0.00181396	0.00156547	0.00960246	0.00363131	0.00919017	0.0053105	0.0186333	0.00458684	0.00379246	0.00226154	0.00819812	0.00190328	0.00061516	0.00062267	0.00102061	0.00101797	0.00518267	0.00230578	0.00515074	0.00378377	0.0112373	0.00314412	0.00194404	0.00155643	0.0043179	0.00126816	0.00156927	0.00130382	0.00141729	0.00129172	0.00739256	0.00296854	0.00717045	0.00454714	0.0149353	0.00386548	0.00286825	0.00190898	0.00625801	0.00158572
-114	0.00249737	0.0019947	0.00181087	0.0015549	0.00971854	0.00364918	0.00917668	0.00533663	0.0186556	0.00463769	0.0037886	0.00229277	0.00826377	0.00193778	0.00060252	0.000624123	0.00101486	0.00101217	0.00524527	0.00230825	0.00521801	0.00379869	0.0113281	0.00314349	0.0019826	0.00157134	0.00439957	0.00127581	0.00154995	0.00130941	0.00141287	0.00128353	0.00748191	0.00297871	0.00719734	0.00456766	0.0149918	0.00389059	0.0028856	0.00193206	0.00633167	0.0016068
-113	0.00246946	0.00197668	0.00180364	0.00154027	0.00981789	0.0036416	0.00914837	0.0053472	0.0186201	0.0046823	0.00378436	0.00231895	0.00831289	0.00197135	0.000592508	0.000628197	0.00100854	0.00100776	0.00530023	0.00230794	0.00527811	0.00381115	0.0113941	0.00314249	0.0020218	0.00158617	0.00447537	0.00128287	0.00153098	0.00130244	0.00140609	0.00127401	0.00755906	0.00297477	0.00721324	0.00457918	0.0150071	0.00391239	0.00290308	0.00195256	0.00639413	0.00162711
-112	0.00243489	0.00193092	0.00178897	0.00152128	0.00991738	0.00361936	0.00910871	0.00534306	0.0185617	0.00471897	0.00377856	0.00234472	0.00835403	0.00200429	0.00058246	0.000633005	0.00100018	0.00100356	0.00535355	0.00231029	0.00532726	0.00382305	0.0114336	0.00314629	0.00205972	0.00160265	0.00455063	0.00129131	0.00150868	0.00128196	0.00139458	0.00126242	0.00763546	0.00296482	0.00721799	0.00458306	0.0149977	0.00393263	0.00291914	0.00197368	0.00645233	0.0016478
-111	0.00237828	0.00188371	0.00176744	0.00150373	0.0100544	0.00359899	0.00904885	0.00533599	0.0185055	0.00475498	0.00376077	0.00237291	0.00837424	0.00203929	0.000565501	0.000634142	0.000989355	0.000999372	0.00541955	0.0023139	0.00536547	0.00383591	0.0114609	0.00315481	0.00209084	0.0016198	0.00462025	0.00130127	0.00147189	0.00125893	0.0013784	0.00125155	0.00773699	0.00295645	0.00720716	0.00458595	0.0149832	0.00395489	0.0029258	0.00199636	0.00649725	0.00167028
-110	0.00229629	0.00184647	0.00173489	0.00148961	0.0101892	0.00358538	0.0089592	0.00533193	0.0184161	0.004791	0.00371842	0.00240218	0.00834418	0.00207325	0.000538536	0.000638081	0.000976949	0.000997109	0.00547857	0.00232013	0.00539623	0.00385136	0.0114795	0.00316539	0.00211194	0.00163856	0.00467318	0.00131094	0.00141741	0.00124227	0.00135592	0.00124336	0.0078339	0.00295275	0.00717772	0.00459165	0.0149478	0.0039782	0.00291518	0.00202037	0.00650868	0.0016921
-109	0.0022006	0.00181384	0.00169223	0.00147633	0.0102637	0.00357151	0.00884908	0.00533184	0.0182958	0.00482322	0.00366299	0.00242968	0.00828948	0.00210444	0.000505598	0.000642944	0.000962875	0.000994346	0.005504	0.00232535	0.00541898	0.00387105	0.0114857	0.00317811	0.00212801	0.00165779	0.00472081	0.00132065	0.0013531	0.00122839	0.00132755	0.00123534	0.00788386	0.00294843	0.00713403	0.00460145	0.0148907	0.00400067	0.0028955	0.00204374	0.00650515	0.00171254
-108	0.00210445	0.00177359	0.00164847	0.00146079	0.010301	0.00355238	0.00874333	0.00533621	0.0181723	0.00485172	0.00361283	0.00245582	0.00824696	0.00213482	0.000472201	0.000643089	0.000947099	0.000989388	0.00551072	0.00233002	0.00543767	0.00389366	0.01148	0.0031942	0.00214329	0.00167607	0.00476875	0.00133089	0.00128832	0.00120834	0.00129778	0.00122509	0.00790586	0.0029412	0.0070905	0.00461493	0.0148262	0.00402296	0.00287806	0.00206595	0.00650785	0.00173286
-107	0.0020175	0.00173359	0.00160539	0.00144554	0.0103332	0.00352883	0.00866629	0.00534923	0.0180749	0.0048803	0.00357656	0.0024815	0.00822057	0.00216345	0.000443093	0.000643458	0.000929393	0.000984667	0.00551699	0.00233609	0.0054572	0.00392195	0.0114747	0.00321624	0.00215753	0.00169578	0.00481098	0.00134253	0.0012303	0.00118852	0.00126739	0.0012151	0.00792509	0.00293246	0.00706174	0.00463559	0.0147748	0.00404827	0.00286705	0.00208864	0.00651578	0.00175299
-106	0.00193865	0.00169511	0.00156475	0.00143343	0.0103851	0.00350654	0.00862434	0.00537201	0.0180292	0.00490781	0.00356333	0.00250483	0.00821685	0.00218751	0.000417116	0.000642681	0.000912436	0.000982256	0.00553296	0.00234519	0.00547614	0.00395733	0.0114772	0.00324504	0.002171	0.00171677	0.00484393	0.00135531	0.00117789	0.0011689	0.00123859	0.00120784	0.00795905	0.00292587	0.00705024	0.00466467	0.0147532	0.00407642	0.00286716	0.0021108	0.00653039	0.00177141
-105	0.00186843	0.00166399	0.00152979	0.00142431	0.0104762	0.00349861	0.00861518	0.0054058	0.0180432	0.0049357	0.00357632	0.00252391	0.00824541	0.00220851	0.000393833	0.000641067	0.00089904	0.000982142	0.00556692	0.00236496	0.00549263	0.00399768	0.0114828	0.00328062	0.00218708	0.00173628	0.00487228	0.00136982	0.00113113	0.00115253	0.00121441	0.00120322	0.00802156	0.00293179	0.00705391	0.00470174	0.014763	0.00410816	0.0028817	0.00213009	0.00655885	0.00178916
-104	0.00180805	0.00164079	0.00149837	0.00141666	0.0106011	0.00350824	0.00862023	0.00545094	0.0180913	0.00496719	0.00360425	0.00254335	0.00829328	0.00222794	0.000371945	0.000640939	0.000887167	0.000982919	0.00560896	0.00239728	0.00550522	0.00404305	0.011487	0.00332189	0.00220621	0.00175821	0.00490085	0.00138781	0.00109	0.00114086	0.00119277	0.00119979	0.00810503	0.00295276	0.00706272	0.004747	0.0147891	0.00414454	0.00290523	0.00215078	0.00659707	0.00180787
-103	0.00175106	0.0016278	0.00147436	0.00141077	0.010737	0.00353935	0.00864195	0.0055103	0.0181798	0.00501045	0.00364104	0.0025626	0.00836001	0.00224625	0.000351091	0.000639329	0.000877817	0.000983179	0.005655	0.00243784	0.00552495	0.00409313	0.011515	0.00336533	0.00222884	0.00178066	0.00493534	0.00140736	0.00105108	0.00113356	0.00117609	0.00119697	0.00819602	0.0029886	0.00708345	0.00480171	0.0148474	0.00418789	0.00293494	0.00217163	0.00664767	0.0018268
-102	0.00170266	0.00162764	0.00146066	0.00140674	0.0108989	0.00358642	0.00867177	0.00558111	0.0182632	0.00506745	0.00368125	0.00257948	0.0084365	0.00226547	0.000333684	0.000636869	0.000872236	0.000982793	0.00571834	0.00248289	0.00556397	0.00414451	0.0115814	0.00340522	0.00225482	0.00180132	0.00497522	0.00142659	0.00101817	0.00113225	0.00116645	0.00119477	0.0083086	0.00303466	0.00711787	0.00486281	0.0149223	0.00423633	0.00296804	0.0021904	0.00670586	0.00184603
-101	0.00167726	0.00162797	0.00145602	0.00140262	0.0110639	0.00364127	0.00870681	0.0056543	0.0183213	0.00512914	0.00373078	0.00259267	0.00852729	0.0022857	0.000324402	0.000635915	0.000869157	0.000981899	0.00578579	0.00253288	0.00561703	0.00419631	0.0116701	0.00344221	0.0022876	0.00182146	0.00502101	0.00144663	0.00100083	0.00113194	0.00116259	0.00119226	0.00842486	0.00308707	0.00716192	0.0049253	0.0149957	0.00428567	0.00300919	0.00220706	0.00677415	0.00186617
-100	0.00167959	0.00161528	0.00145826	0.00139647	0.0112107	0.0036975	0.00875001	0.0057241	0.0183898	0.0051921	0.00379611	0.002602	0.00864142	0.00230555	0.000325779	0.000630239	0.000866666	0.000979039	0.0058456	0.0025842	0.00567126	0.00424648	0.01176	0.00347813	0.00232844	0.00183951	0.00507622	0.00146607	0.00100269	0.00112276	0.00116246	0.00118775	0.00852817	0.00314085	0.00721063	0.00498529	0.0150749	0.00433511	0.00306228	0.00222076	0.00685882	0.00188581
-99	0.0017152	0.0015982	0.00146744	0.00139055	0.0113707	0.00375436	0.00878154	0.00579035	0.0184331	0.00525679	0.00386213	0.00261054	0.00874119	0.00232532	0.000337252	0.000622324	0.000864988	0.000975709	0.00592394	0.00263558	0.00572111	0.00429384	0.0118435	0.00351296	0.00237018	0.00185573	0.00512747	0.0014844	0.00102623	0.00111026	0.00116621	0.00118313	0.00864734	0.00319497	0.00725132	0.0050421	0.0151383	0.00438488	0.00311615	0.00223314	0.00693433	0.00190486
-98	0.00177906	0.00158485	0.00148592	0.00138576	0.0115269	0.0038075	0.00879627	0.0058543	0.0184634	0.00531991	0.00391688	0.00262051	0.00880417	0.00234515	0.000356244	0.000615644	0.000865456	0.000972841	0.00601057	0.0026829	0.00576328	0.00433909	0.011928	0.00354456	0.00240614	0.00187255	0.00517183	0.00150264	0.00106765	0.00110025	0.00117569	0.0011793	0.00876876	0.0032452	0.00727978	0.00509669	0.0151957	0.00443223	0.00316151	0.00224653	0.006988	0.0019239
-97	0.00183894	0.00156549	0.0015106	0.00137769	0.0116981	0.0038563	0.0088021	0.00590892	0.0185118	0.00537409	0.00396429	0.00263017	0.00884735	0.00236277	0.000371532	0.000604864	0.000867155	0.000968272	0.00610035	0.00272564	0.00580131	0.00437753	0.0120161	0.00357185	0.00243789	0.00188836	0.0052162	0.00151973	0.00110524	0.00108517	0.00118888	0.00117298	0.00889922	0.00329097	0.0073017	0.00514323	0.015264	0.00447297	0.00320109	0.00225926	0.00703178	0.00194125
-96	0.00190078	0.00154697	0.00153794	0.00136794	0.0118778	0.00390297	0.00880481	0.00594742	0.0185579	0.00540891	0.00400409	0.00263771	0.00887051	0.00237591	0.000386264	0.00059339	0.000868853	0.00096221	0.00619786	0.0027665	0.00583969	0.00441061	0.0121045	0.00359866	0.00247019	0.00190249	0.00525897	0.00153727	0.00114352	0.00107018	0.00120339	0.00116508	0.00903784	0.00333474	0.00732225	0.00517902	0.0153312	0.00450378	0.00323714	0.0022701	0.00706474	0.00195659
-95	0.00197495	0.00152437	0.00156885	0.00135921	0.0120426	0.00393932	0.0088167	0.00596386	0.018614	0.00541292	0.00402982	0.00264263	0.00887602	0.00238271	0.000402442	0.000582402	0.000871067	0.00095518	0.0063054	0.00279873	0.00588421	0.00444209	0.0122128	0.0036271	0.00250013	0.00191762	0.00530479	0.0015579	0.0011887	0.00105339	0.00121996	0.0011572	0.00917401	0.00336902	0.00735045	0.00520298	0.0154134	0.00452001	0.00326498	0.00228013	0.0070904	0.00197031
-94	0.00204679	0.001494	0.00160245	0.00135148	0.0121846	0.00396711	0.00884364	0.00596296	0.0186965	0.00539771	0.00404478	0.00264461	0.00887431	0.00238615	0.000415189	0.000568677	0.000875	0.000946954	0.00642315	0.00282193	0.00593912	0.00446995	0.0123433	0.00365588	0.00252761	0.00193124	0.00535494	0.00157873	0.00123099	0.00103134	0.00123872	0.00114922	0.00930385	0.00339452	0.00739138	0.00521645	0.0155199	0.00452679	0.0032862	0.00228792	0.00711463	0.00198244
-93	0.00211157	0.00146601	0.00163444	0.00134678	0.0123197	0.00399111	0.00887	0.00594886	0.0187978	0.00536622	0.00405402	0.00265117	0.00886921	0.00238831	0.000424443	0.000553201	0.000878872	0.000938796	0.00654441	0.0028405	0.00599622	0.00449375	0.0124709	0.00368625	0.00255478	0.00194718	0.00540723	0.00160028	0.00126801	0.00100961	0.00125665	0.00114279	0.00943205	0.0034158	0.00743311	0.0052213	0.0156343	0.00452624	0.0033044	0.00229917	0.00713822	0.0019943
-92	0.00217238	0.0014376	0.00165978	0.00134541	0.012426	0.00401608	0.00889669	0.00592645	0.0189232	0.00531523	0.00406725	0.00266541	0.00888105	0.00238688	0.000431787	0.000536954	0.000880534	0.000931849	0.0066485	0.00285494	0.00604575	0.00451718	0.0125831	0.00372055	0.00258534	0.00196809	0.00547127	0.00162349	0.00130209	0.000987277	0.00127016	0.00113863	0.00953724	0.00343551	0.00747122	0.00522182	0.0157531	0.00451789	0.00332629	0.00231675	0.00717616	0.00200519
-91	0.00223044	0.00141279	0.00167738	0.00134574	0.0124923	0.00403895	0.00893238	0.00590452	0.0190663	0.00525861	0.00408268	0.00268394	0.00890978	0.00238345	0.000438377	0.000521603	0.000880639	0.000925772	0.00673722	0.00286373	0.0060933	0.00454171	0.0126892	0.003756	0.00261678	0.00199025	0.00554664	0.00164686	0.00133441	0.000967194	0.00127901	0.00113576	0.00961477	0.00345134	0.00751284	0.00522311	0.0158777	0.00450731	0.00334973	0.0023371	0.00722821	0.00201516
-90	0.00228189	0.00140343	0.00169081	0.00134919	0.0125697	0.00405728	0.00898997	0.00588737	0.0192469	0.00520399	0.0040985	0.00270479	0.00895716	0.00238352	0.000442822	0.000510912	0.000879056	0.000921016	0.00684139	0.00286684	0.00614952	0.00456826	0.0128084	0.00379104	0.00264649	0.00201251	0.00563008	0.0016732	0.00136236	0.000957172	0.00128493	0.0011351	0.00970554	0.00346206	0.00756975	0.00522781	0.0160276	0.00449751	0.00337249	0.00235865	0.00729362	0.00202836
-89	0.00230615	0.00140541	0.00169449	0.00135367	0.0126312	0.00408055	0.00907861	0.00587465	0.0194959	0.00515176	0.00411938	0.00272911	0.00904364	0.00238815	0.000442384	0.000504081	0.000875272	0.000916612	0.0069429	0.00287178	0.00621448	0.00459716	0.0129449	0.00382612	0.00267705	0.00203724	0.00572758	0.00170262	0.00137427	0.000954745	0.00128488	0.00113514	0.00978707	0.00347617	0.00764655	0.00523591	0.0162204	0.00448894	0.00339822	0.00238317	0.00738561	0.00204539
-88	0.00229698	0.00141139	0.00168291	0.00135908	0.0126738	0.00412231	0.00918995	0.00586737	0.0197787	0.00510884	0.00414333	0.00275817	0.00917109	0.00239793	0.000437352	0.000498267	0.000870248	0.000912667	0.00703116	0.00288835	0.00628687	0.00462971	0.0130848	0.00386598	0.00271106	0.00206564	0.00583633	0.00173544	0.00136717	0.00095483	0.00127658	0.00113587	0.00985249	0.00350533	0.00773841	0.00524854	0.0164318	0.00448741	0.00342719	0.00241191	0.00750371	0.00206668
-87	0.00228494	0.00142291	0.00166506	0.00136872	0.0126838	0.00418307	0.00930374	0.00587181	0.0200528	0.00508075	0.00417197	0.00279411	0.00932418	0.00241525	0.000436273	0.000495365	0.000866397	0.000910789	0.00709526	0.00291548	0.00635955	0.00466916	0.0132182	0.00391071	0.00274921	0.00209846	0.00595204	0.00177233	0.00136061	0.000959137	0.00126573	0.00113975	0.00988954	0.00354927	0.00783165	0.00527049	0.0166355	0.00449573	0.00346059	0.00244629	0.00763811	0.00209379
-86	0.00227126	0.00143456	0.00165176	0.0013777	0.0126896	0.00424558	0.00941595	0.00589068	0.0203343	0.00507312	0.00420713	0.00283827	0.00950681	0.00244023	0.000432417	0.000494623	0.00086197	0.00090963	0.00713674	0.00294408	0.0064308	0.0047129	0.0133528	0.00395637	0.00278789	0.00213614	0.00608141	0.0018107	0.00135184	0.000964591	0.00125686	0.00114367	0.00991318	0.00359483	0.00792338	0.00530179	0.0168436	0.00451474	0.00349751	0.00248721	0.00779411	0.00212546
-85	0.00224409	0.00144945	0.00163882	0.00138321	0.012722	0.00430644	0.00952577	0.0059217	0.0206112	0.00509032	0.00425542	0.0028868	0.00972057	0.00247053	0.000425637	0.000494604	0.000853518	0.000907946	0.00714794	0.00297293	0.0064983	0.00475539	0.0134704	0.00400039	0.00283164	0.00217452	0.00622317	0.00184671	0.00133486	0.000972029	0.00124617	0.00114558	0.00993497	0.00363969	0.00801204	0.00533855	0.0170408	0.00454535	0.00354353	0.00253066	0.00797187	0.00215862
-84	0.00221613	0.00147024	0.0016229	0.0013883	0.0128449	0.00436896	0.0096337	0.00596418	0.0208711	0.00512159	0.00432096	0.00293883	0.00995597	0.00250472	0.000424204	0.000496816	0.000842948	0.000906938	0.00711966	0.0030048	0.00656154	0.00479929	0.0135718	0.00404164	0.00288446	0.00221386	0.00637337	0.0018824	0.00132017	0.000983527	0.00123292	0.00114762	0.00998227	0.00368688	0.00809762	0.00538174	0.0172215	0.00458162	0.00360271	0.00257635	0.00816467	0.00219356
-83	0.00219441	0.0014916	0.00160982	0.00139229	0.0130564	0.0044268	0.00974959	0.00601652	0.0211183	0.00516043	0.00439792	0.00298591	0.0102037	0.00254215	0.000423435	0.000501266	0.00083258	0.000906121	0.00707468	0.00303547	0.00662575	0.00484598	0.0136714	0.00407895	0.00294287	0.00224915	0.00652928	0.00191809	0.00130892	0.000996433	0.0012212	0.00114921	0.0100656	0.00373114	0.00818767	0.00543125	0.0173948	0.00461969	0.0036704	0.00261753	0.00836648	0.00223012
-82	0.00216316	0.00151455	0.00159946	0.00139365	0.0133035	0.00447051	0.00987944	0.00606933	0.0213585	0.00520616	0.00447927	0.00302334	0.0104399	0.00258207	0.000417872	0.00050737	0.000821991	0.000904113	0.00703888	0.00306319	0.00669539	0.00489085	0.0137672	0.00411253	0.00300117	0.00227856	0.00667576	0.00195244	0.00129052	0.00101096	0.00121073	0.00114888	0.0101712	0.00376685	0.00828742	0.00548009	0.0175629	0.00465934	0.00374022	0.00265095	0.00855781	0.00226725
-81	0.00211434	0.0015321	0.00159205	0.00139362	0.0136162	0.00450225	0.0100291	0.00611713	0.0216043	0.00524955	0.00457214	0.00305883	0.0106733	0.00262366	0.0004042	0.000510815	0.000810243	0.000900598	0.00701542	0.00308901	0.0067723	0.00493158	0.0138569	0.00414185	0.00306364	0.00230804	0.0068211	0.00198631	0.00125927	0.00102146	0.00120115	0.00114711	0.0103158	0.00379563	0.00840068	0.00552435	0.0177306	0.0046957	0.00381789	0.00268343	0.00874718	0.00230498
-80	0.00205799	0.00153763	0.00158965	0.00139045	0.0139765	0.00452932	0.0101768	0.00616334	0.0218006	0.00528748	0.00467475	0.00309705	0.0109017	0.00266491	0.000384891	0.000511226	0.000800098	0.000896436	0.00698412	0.00311554	0.00684775	0.00497101	0.0139309	0.00416727	0.00313138	0.0023401	0.00696878	0.0020195	0.00122144	0.00102443	0.00119487	0.00114344	0.0104803	0.00382243	0.0085123	0.00556718	0.0178658	0.00472737	0.00390306	0.00271857	0.00893523	0.0023422
-79	0.00201101	0.00153282	0.00159441	0.00138401	0.0143926	0.00454283	0.0103094	0.00620948	0.0219351	0.00532112	0.00478468	0.00313524	0.0111213	0.00270404	0.000362826	0.000510399	0.000791594	0.000892436	0.00695239	0.00313526	0.00692318	0.00501089	0.0139968	0.00419015	0.00320317	0.00237273	0.00711558	0.00205145	0.00118692	0.00102161	0.001193	0.00113822	0.0106725	0.00383905	0.00861631	0.00561018	0.0179659	0.00475564	0.00399393	0.00275398	0.00911845	0.00237775
-78	0.0019766	0.00152522	0.00160506	0.00137444	0.0148446	0.00453024	0.0104366	0.00625253	0.0220298	0.00534322	0.00491288	0.00316983	0.011346	0.00274019	0.000338875	0.000508624	0.00078229	0.000887043	0.00693459	0.00313909	0.00700201	0.00504806	0.014063	0.00420688	0.00328381	0.00240302	0.0072708	0.00208152	0.00115774	0.00101692	0.00119367	0.00113074	0.0108896	0.00383467	0.0087193	0.00565029	0.0180464	0.00477505	0.00409834	0.00278642	0.00930839	0.00241086
-77	0.00193637	0.00151899	0.00161439	0.00136167	0.0153101	0.00449503	0.0105664	0.00629251	0.0220952	0.00535154	0.0050465	0.00320131	0.0115796	0.00277392	0.000309844	0.000505438	0.000770796	0.000880183	0.00694285	0.00313042	0.00708368	0.00508266	0.0141276	0.00421779	0.00336788	0.00243193	0.00743643	0.00211086	0.00112311	0.00101221	0.00119259	0.00112093	0.0111265	0.00381273	0.00882505	0.00568759	0.0181114	0.00478467	0.00420719	0.00281662	0.00950802	0.00244239
-76	0.00187854	0.0015116	0.00160441	0.00134939	0.0157241	0.00445699	0.0107002	0.00633309	0.0221476	0.00534818	0.00517746	0.00323035	0.0118212	0.00280684	0.000280092	0.000498987	0.000760732	0.000872638	0.00695768	0.00311823	0.0071665	0.00511762	0.0141866	0.00422406	0.00345145	0.00245989	0.00760856	0.00214077	0.00107932	0.0010053	0.00118257	0.00111101	0.0113409	0.00378761	0.00893333	0.00572536	0.0181671	0.00478612	0.00431446	0.00284512	0.00971486	0.0024738
-75	0.00181336	0.00150362	0.00157851	0.00133832	0.0160212	0.00442067	0.0108384	0.00638264	0.0222332	0.00533693	0.00530527	0.0032606	0.0120703	0.00284256	0.000251754	0.000491234	0.000754698	0.000865011	0.00696958	0.00310424	0.00724652	0.00515808	0.0142455	0.00422781	0.00353217	0.00248852	0.00777947	0.00217358	0.00103256	0.000997425	0.0011666	0.00110167	0.0114954	0.00376246	0.00904246	0.00577036	0.0182393	0.00478237	0.00441872	0.00287456	0.00992486	0.00250807
-74	0.00175016	0.00149191	0.0015505	0.00132373	0.0160993	0.00437741	0.0109714	0.00643728	0.0223398	0.00532133	0.00541911	0.00329292	0.0123169	0.00288016	0.00022185	0.000483311	0.000748439	0.000856349	0.00701087	0.0030832	0.00732075	0.0052014	0.0142948	0.00423076	0.00360362	0.00251766	0.00794578	0.00220778	0.000986006	0.000987608	0.00114947	0.00109004	0.0115551	0.0037303	0.00914607	0.00581934	0.0183173	0.00477604	0.00451136	0.00290529	0.0101313	0.00254397
-73	0.00168683	0.00147442	0.00151513	0.00130298	0.0159872	0.00432819	0.0110916	0.0064879	0.0224277	0.00530217	0.00551755	0.00333089	0.0125488	0.00291693	0.000193553	0.000473439	0.000739005	0.000845677	0.00706705	0.00305753	0.00738742	0.00524169	0.0143265	0.00423114	0.00366571	0.00255018	0.00810274	0.00224102	0.000940194	0.000973927	0.00112707	0.00107433	0.0115271	0.00369286	0.0092395	0.0058648	0.0183771	0.00476666	0.00459163	0.00294053	0.0103258	0.00257897
-72	0.0016308	0.00144997	0.00147791	0.00127941	0.0158071	0.00427903	0.0111976	0.0065434	0.0225116	0.00527884	0.00560382	0.00337599	0.0127982	0.0029532	0.000169012	0.000459552	0.000729753	0.000834094	0.00710647	0.00303141	0.00744597	0.00528098	0.0143512	0.00422618	0.00372214	0.00258712	0.00826688	0.00227374	0.000899907	0.00095476	0.00110383	0.00105675	0.0114568	0.00365522	0.00932178	0.00591219	0.0184314	0.00475251	0.00466298	0.00298156	0.0105326	0.00261347
-71	0.00159258	0.00142399	0.0014413	0.00125456	0.0155426	0.00423578	0.011265	0.00661322	0.0225793	0.00525724	0.00567591	0.00342292	0.0130604	0.00298984	0.000152209	0.000445206	0.000723538	0.000822999	0.00713473	0.0030073	0.00749162	0.00531956	0.0143767	0.00421858	0.00377344	0.00262469	0.00843668	0.00230693	0.000872394	0.000934599	0.00108242	0.00103878	0.0113387	0.00362154	0.00937829	0.00596639	0.018478	0.00473791	0.00472467	0.00302381	0.0107485	0.00264839
-70	0.00156217	0.0014059	0.00140036	0.00122994	0.0151664	0.00419789	0.0113084	0.00668899	0.0226498	0.00523767	0.00574644	0.00347012	0.0133463	0.00302763	0.000142636	0.00043154	0.000717198	0.000811117	0.0071502	0.00298273	0.00753289	0.00535418	0.0144093	0.00421091	0.00382616	0.00266186	0.00861286	0.00234086	0.000852402	0.000918718	0.00105878	0.00102053	0.0111583	0.00359031	0.00942066	0.00602159	0.0185295	0.00472429	0.0047863	0.00306599	0.0109796	0.00268425
-69	0.00152269	0.00139425	0.00135516	0.00120881	0.0146663	0.00416367	0.0113494	0.00676445	0.0227281	0.00521762	0.00581828	0.00352032	0.0136673	0.00306873	0.000137927	0.000416286	0.000710183	0.000797833	0.00713951	0.00295851	0.00757337	0.00538495	0.0144369	0.00420302	0.00388147	0.00270032	0.00880214	0.00237723	0.000830307	0.00090527	0.00103267	0.00100332	0.0109029	0.00356109	0.00946138	0.0060747	0.0185825	0.00471032	0.00484987	0.00311032	0.0112347	0.00272298
-68	0.00147463	0.00137943	0.00130858	0.00119078	0.0140975	0.00413706	0.0113766	0.00683828	0.0228019	0.00519823	0.00587675	0.00357308	0.0139795	0.00311168	0.000135541	0.000401935	0.00070345	0.000784494	0.00710123	0.00293604	0.00760614	0.00541259	0.0144524	0.00419315	0.00393007	0.0027393	0.00898481	0.00241458	0.000805086	0.000890685	0.00100602	0.000987639	0.0105994	0.00353655	0.00949138	0.00612544	0.0186271	0.00469569	0.00490341	0.00315619	0.0114822	0.00276313
-67	0.00143194	0.00135606	0.0012671	0.00117127	0.0135174	0.0041121	0.0113954	0.0069014	0.0228747	0.00517724	0.00593402	0.0036229	0.0142756	0.00315276	0.000135726	0.000389217	0.000697072	0.000769625	0.00704354	0.00290948	0.00763331	0.00543265	0.0144603	0.00417835	0.0039761	0.00277497	0.00915218	0.00244982	0.000783831	0.000872639	0.000982088	0.000970448	0.0102805	0.00351079	0.00951434	0.00616703	0.0186675	0.00467779	0.00495506	0.00319894	0.0117139	0.00280129
-66	0.0014067	0.00133109	0.00124258	0.00114844	0.0129749	0.00408364	0.01141	0.00694861	0.0229421	0.00515515	0.00599843	0.00366786	0.0145893	0.00319343	0.000138674	0.0003777	0.000690881	0.000752942	0.00698765	0.00287552	0.00765883	0.00544077	0.0144637	0.00415916	0.00402628	0.00280585	0.00931553	0.00248421	0.000772685	0.000854395	0.00096673	0.000950691	0.00998129	0.00347958	0.00953441	0.00619469	0.0187029	0.00465716	0.00501235	0.00323686	0.0119524	0.00283882
-65	0.00139089	0.00130412	0.00122937	0.00112357	0.0125225	0.00405366	0.0114071	0.0069731	0.0229293	0.00512849	0.00606538	0.00370684	0.0149206	0.00323195	0.000141596	0.00036623	0.000683833	0.000734863	0.00694557	0.00283684	0.0076864	0.00543333	0.0144627	0.00413329	0.00407889	0.00283253	0.00948915	0.00251613	0.000766241	0.000835175	0.000956602	0.000929216	0.00973405	0.00344525	0.00954674	0.00620322	0.018696	0.00463089	0.00507213	0.00326969	0.0122049	0.00287404
-64	0.0013725	0.00127738	0.00121359	0.00109924	0.0122001	0.00402161	0.011391	0.00697618	0.0228479	0.00509187	0.00614542	0.00373559	0.0152751	0.00326698	0.000142782	0.000354004	0.000675207	0.000715767	0.00689256	0.00279497	0.00771265	0.00541224	0.0144544	0.00409854	0.00413785	0.00285343	0.00967114	0.00254553	0.000757641	0.00081569	0.000944399	0.000907503	0.00954632	0.00340829	0.00955183	0.00619421	0.0186512	0.0045952	0.00514163	0.00329451	0.0124731	0.00290625
-63	0.0013537	0.00125277	0.00119819	0.0010783	0.0119688	0.00398667	0.0113624	0.00696977	0.0227459	0.00504933	0.00624014	0.00375768	0.0156732	0.00330365	0.000142389	0.000341194	0.000666667	0.000697094	0.00682422	0.0027479	0.00773273	0.00538506	0.0144348	0.0040592	0.00420328	0.0028708	0.00986389	0.00257725	0.000748042	0.00079698	0.000932428	0.000887697	0.00939651	0.00336729	0.00954759	0.00617741	0.0185904	0.00455427	0.00522171	0.00331424	0.0127685	0.00294045
-62	0.00133369	0.00123137	0.00118156	0.00105787	0.0117568	0.00394561	0.0113113	0.00695132	0.0226006	0.00500691	0.00633973	0.00377989	0.0160697	0.00334439	0.00014079	0.00033009	0.000657042	0.00067782	0.00675107	0.00269354	0.00774039	0.00535255	0.0143901	0.00401931	0.00426918	0.00288824	0.0100478	0.00261226	0.000737239	0.000780731	0.000919302	0.000867843	0.00925391	0.00331957	0.00952583	0.00615194	0.0184953	0.00451311	0.00530445	0.00333407	0.0130588	0.00297833
-61	0.0012986	0.00121208	0.00116179	0.001035	0.0115581	0.00388971	0.0112683	0.00690471	0.0224508	0.0049563	0.00644057	0.00380194	0.0164799	0.00338586	0.000134388	0.000320462	0.000644565	0.00065671	0.0066578	0.00262969	0.00773851	0.005317	0.0143139	0.0039775	0.00433178	0.00290591	0.0102211	0.00264767	0.000716496	0.000766269	0.000903176	0.000845856	0.00910793	0.0032597	0.0095034	0.00611085	0.0183823	0.0044669	0.00538617	0.00335393	0.0133505	0.00301676
-60	0.00125244	0.00118308	0.00114197	0.00100872	0.0114214	0.00381674	0.0112365	0.00683305	0.0223076	0.00489367	0.00653398	0.00381892	0.0169148	0.00342454	0.000122148	0.000310544	0.000630881	0.000634665	0.00655905	0.00255701	0.00772716	0.00527811	0.0142103	0.00393041	0.00438669	0.00292064	0.0103963	0.00268111	0.000687294	0.000746814	0.000886426	0.000821694	0.00899025	0.00318687	0.00948184	0.00605558	0.0182589	0.00441204	0.00546033	0.00336978	0.0136555	0.00305282
-59	0.00121734	0.00114421	0.00112474	0.000976435	0.0113731	0.00373549	0.0112081	0.00674785	0.0221661	0.00482185	0.00663738	0.00382807	0.0173892	0.0034602	0.000107621	0.000301041	0.000617001	0.000612581	0.00647736	0.00247824	0.00770598	0.00523331	0.0140868	0.00387555	0.00444259	0.0029302	0.0105758	0.00271243	0.000662482	0.000722625	0.000870871	0.000794508	0.00892523	0.00310687	0.00945704	0.00599058	0.0181265	0.0043487	0.00553999	0.00337914	0.0139825	0.00308631
-58	0.00119753	0.00110429	0.00111053	0.000941705	0.0113728	0.00364926	0.0111923	0.00665574	0.0220396	0.00474516	0.00676667	0.00383444	0.0179482	0.00349551	9.41517e-05	0.000290134	0.000603353	0.000590804	0.00640465	0.00239842	0.00768342	0.00518538	0.0139523	0.00381677	0.00450892	0.00293956	0.010778	0.00274412	0.000645841	0.000697214	0.000856943	0.000766254	0.00888872	0.00302384	0.00943785	0.00592056	0.017996	0.00428096	0.0056378	0.003387	0.0143631	0.00311981
-57	0.00117968	0.00106757	0.00109186	0.000911323	0.0113738	0.00356221	0.0111785	0.00656822	0.0219254	0.00466911	0.00690767	0.0038443	0.0185884	0.00353437	8.0958e-05	0.000277623	0.0005899	0.000570668	0.00632142	0.00232365	0.0076589	0.00513861	0.0138119	0.00375798	0.00458048	0.00295126	0.0110185	0.00277792	0.000630321	0.000672595	0.000840881	0.000740996	0.00884763	0.00294293	0.0094187	0.00585341	0.0178686	0.00421355	0.00574407	0.00339778	0.0148035	0.00315615
-56	0.0011491	0.00103244	0.00106135	0.000885075	0.0113378	0.00346902	0.0111544	0.00648503	0.0217864	0.00459101	0.0070524	0.00385751	0.0192616	0.00357485	6.54798e-05	0.000266385	0.000573465	0.000552374	0.00621556	0.00225387	0.00762531	0.00509496	0.013652	0.00369746	0.00465016	0.00296515	0.011286	0.00281194	0.000607291	0.000649412	0.000817406	0.000718725	0.00877669	0.00286145	0.00938984	0.00578999	0.0177192	0.00414424	0.00585128	0.00341133	0.0152738	0.00319339
-55	0.00111204	0.000997156	0.00102542	0.000860547	0.0112518	0.00336995	0.0111205	0.00640836	0.0216253	0.00451309	0.00719661	0.00387611	0.0199182	0.00361895	5.00425e-05	0.000255581	0.000554115	0.0005348	0.00609022	0.00218724	0.00757818	0.00505608	0.0134615	0.00363675	0.00471805	0.00298332	0.0115511	0.00284836	0.00058104	0.000626369	0.000789768	0.000697674	0.00867101	0.00277859	0.00934935	0.00573222	0.0175434	0.00407492	0.00595733	0.00342971	0.0157346	0.00323366
-54	0.00108113	0.000960355	0.00099289	0.000836591	0.0111362	0.00327459	0.0110798	0.00634284	0.0214413	0.00444229	0.00732891	0.00390854	0.0205567	0.0036707	3.79089e-05	0.000243945	0.000536139	0.000517829	0.00595801	0.00212587	0.00752337	0.00502219	0.0132563	0.00357976	0.00478069	0.0030111	0.0118202	0.0028896	0.000559521	0.00060215	0.000764514	0.00067721	0.00854708	0.00270023	0.00930158	0.00568251	0.0173488	0.00401103	0.0060548	0.00345982	0.0161884	0.00328015
-53	0.00105359	0.000924545	0.000962695	0.000812292	0.0109976	0.00318279	0.0110303	0.00628191	0.0212215	0.00437588	0.00744431	0.00394732	0.0211531	0.00372569	2.86607e-05	0.000233592	0.000519816	0.000501141	0.00582157	0.00207164	0.00746396	0.00498818	0.0130522	0.00352407	0.00483484	0.00304301	0.0120907	0.00293131	0.000541125	0.000579068	0.000741255	0.000656717	0.00840959	0.00262721	0.00924715	0.00563504	0.0171369	0.00394998	0.00613958	0.00349516	0.0166219	0.0033285
-52	0.00102512	0.000890379	0.000931902	0.000789291	0.0108308	0.0030979	0.0109772	0.00621568	0.0209618	0.00430569	0.00755594	0.00397759	0.0217042	0.00377812	2.14072e-05	0.000223597	0.000503347	0.000485338	0.00567351	0.00202359	0.00740426	0.00494944	0.01285	0.00346616	0.00488811	0.00306833	0.012358	0.00297016	0.000523264	0.000556988	0.000717624	0.000637315	0.00825214	0.00256074	0.00919075	0.00558256	0.0169059	0.00388592	0.00622203	0.00352296	0.0170311	0.00337414
-51	0.00100222	0.000854499	0.000899797	0.000768786	0.0106404	0.00302537	0.0108973	0.00614805	0.02061	0.00423483	0.00765997	0.00400169	0.0221817	0.00382749	1.73055e-05	0.000212604	0.000485868	0.000470779	0.00552436	0.00198221	0.00734152	0.00490299	0.0126378	0.00340632	0.00494007	0.00308794	0.0126145	0.00300613	0.000509762	0.000533552	0.000692833	0.000619783	0.00808238	0.00250379	0.0091194	0.00552552	0.0166239	0.00382057	0.00630002	0.00354482	0.0173981	0.00341681
-50	0.00098601	0.000820814	0.000865478	0.000750308	0.0104051	0.00296626	0.0107737	0.00608538	0.0201642	0.00416807	0.00774257	0.00402663	0.0225399	0.00387699	1.60667e-05	0.000201612	0.000467059	0.000457256	0.00537242	0.0019491	0.00726536	0.00485199	0.0124042	0.00334626	0.00498292	0.00310668	0.0128347	0.00304135	0.000501038	0.000511213	0.000666268	0.000603782	0.00788877	0.00245768	0.00901953	0.00546868	0.0162842	0.00375717	0.00636275	0.00356666	0.0176873	0.00345917
-49	0.000965295	0.000794823	0.000827701	0.0007344	0.0101238	0.00291222	0.0106027	0.00602091	0.019642	0.00410222	0.0077765	0.00405049	0.0227222	0.00392576	1.53379e-05	0.000191797	0.000446807	0.000444179	0.00520622	0.00192088	0.00716835	0.00479647	0.0121481	0.0032861	0.00500195	0.003124	0.0130046	0.00307516	0.000490316	0.00049331	0.000637254	0.000589289	0.00766499	0.00241655	0.00888552	0.00540869	0.0158951	0.00369416	0.00638922	0.00358724	0.0178634	0.00350046
-48	0.000931149	0.000773928	0.000786789	0.000716732	0.00980626	0.00285757	0.0103852	0.00594768	0.0190477	0.00403207	0.00774997	0.00406533	0.0227372	0.00396963	1.40014e-05	0.000182814	0.000425473	0.000430799	0.00503426	0.00189169	0.00704629	0.00473186	0.0118667	0.00322301	0.00498984	0.00313332	0.0131247	0.00310468	0.000472575	0.000478371	0.000606131	0.000573766	0.00742026	0.00237463	0.00871573	0.00533977	0.0154572	0.00362754	0.0063699	0.00359932	0.0179309	0.00353716
-47	0.000888721	0.000753188	0.000745861	0.000693059	0.00945146	0.0028006	0.0101342	0.00586088	0.0183923	0.00395387	0.00768169	0.00406936	0.0226082	0.00400368	1.2548e-05	0.000173598	0.000403615	0.000416399	0.00486108	0.00185884	0.00690136	0.00465724	0.0115497	0.00315448	0.00495398	0.00313562	0.0131799	0.00312758	0.000450634	0.000463393	0.000574738	0.000554729	0.00715627	0.00232972	0.00851778	0.00525906	0.014971	0.00355418	0.00631783	0.00360249	0.0178941	0.00356563
-46	0.000853128	0.000730635	0.000709162	0.000665909	0.00909565	0.00274559	0.00985988	0.00576321	0.0177056	0.00386987	0.0075759	0.0040648	0.0223113	0.00402812	1.24467e-05	0.000162173	0.000382784	0.000400892	0.00469052	0.00182291	0.00673729	0.00457392	0.0112077	0.0030817	0.0048963	0.0031317	0.0131499	0.00314358	0.000432787	0.000446404	0.000545973	0.000533401	0.00689308	0.00228425	0.00829859	0.00516856	0.0144566	0.00347578	0.0062361	0.00359825	0.0177306	0.00358585
-45	0.00082568	0.000710633	0.000674889	0.000637796	0.0087464	0.00268987	0.0095742	0.00565084	0.01702	0.00377777	0.00744029	0.00404695	0.0219086	0.00404198	1.20108e-05	0.000150708	0.000362904	0.000385498	0.00452022	0.00178442	0.00655737	0.00447802	0.0108574	0.00300341	0.00481412	0.00311627	0.0130548	0.00315069	0.000418846	0.000430671	0.000518897	0.000511647	0.00663331	0.00223715	0.00806579	0.00506443	0.0139387	0.00339059	0.00612721	0.00358161	0.0174817	0.00359633
-44	0.000793385	0.000693935	0.000639332	0.000609583	0.00838697	0.00262856	0.00927897	0.00551365	0.0163358	0.00367271	0.00729432	0.00400955	0.0214337	0.00403961	8.16524e-06	0.000141284	0.000342174	0.000369981	0.00434115	0.00174309	0.00636189	0.00436576	0.0104948	0.00291629	0.0047124	0.0030846	0.0129007	0.00314528	0.000400775	0.00041761	0.000490753	0.000489782	0.00636406	0.00218583	0.00782043	0.00493971	0.0134153	0.0032945	0.00600336	0.00354707	0.0171672	0.00359245
-43	0.000753243	0.000674943	0.000603184	0.000582165	0.00803041	0.00256389	0.00897468	0.0053563	0.0156543	0.00355586	0.00714712	0.00395736	0.0209126	0.00401983	1.19242e-06	0.000131433	0.000320538	0.000353904	0.00415704	0.00169732	0.00615339	0.00424105	0.0101136	0.00282195	0.00459913	0.00303995	0.0127023	0.00312794	0.000377218	0.000403188	0.000461861	0.000468034	0.00609373	0.0021306	0.00756404	0.00479868	0.0128839	0.0031889	0.00587313	0.00349865	0.0168074	0.00357388
-42	0.000716955	0.000651888	0.000568828	0.000555081	0.00769857	0.00249421	0.00866418	0.005192	0.0150054	0.00343201	0.0069951	0.00390143	0.020387	0.00398807	-6.91425e-06	0.000121064	0.000299639	0.000337637	0.00398072	0.00164764	0.00593103	0.00411033	0.00971521	0.0027224	0.00446975	0.00299057	0.0124787	0.00310248	0.00035502	0.000386476	0.000434234	0.000446359	0.00583965	0.00207093	0.00729761	0.00465117	0.0123603	0.00307721	0.00573242	0.003446	0.0164328	0.00354528
-41	0.000684664	0.000629619	0.000537918	0.000528079	0.00739694	0.00241914	0.00836477	0.00502585	0.014443	0.00330396	0.00684038	0.00383887	0.0198636	0.00394744	-1.55125e-05	0.000111783	0.000280539	0.000321397	0.00381476	0.00159414	0.00569454	0.00397649	0.00929951	0.00261883	0.00432633	0.00293539	0.0122263	0.00307108	0.000334576	0.000370701	0.000409229	0.000424738	0.00560585	0.00200664	0.00702966	0.00450117	0.0118713	0.0029614	0.00558336	0.00338713	0.0160449	0.00350926
-40	0.000648365	0.000610899	0.000511292	0.000501601	0.00711929	0.00233404	0.00809206	0.00485085	0.0139847	0.00317101	0.0066915	0.00376402	0.019369	0.00389489	-2.38645e-05	0.000103034	0.000263539	0.000304929	0.00364869	0.00153224	0.00545172	0.00383607	0.00887106	0.00251218	0.00417907	0.0028709	0.0119527	0.00303115	0.00031225	0.000356967	0.000387415	0.000403265	0.00538399	0.00193314	0.00677189	0.00434346	0.0114279	0.00284159	0.00543528	0.00331746	0.0156608	0.00346302
-39	0.000608709	0.000587877	0.00048823	0.000475122	0.00685305	0.0022412	0.00784212	0.00466688	0.0135985	0.00303467	0.00655311	0.00368092	0.0189227	0.00382698	-3.15873e-05	9.26577e-05	0.000248237	0.000288121	0.00348076	0.00146399	0.00520898	0.0036893	0.00843658	0.00240352	0.00403202	0.00279873	0.0116595	0.00297948	0.000288561	0.000340267	0.000368234	0.000381621	0.00516691	0.00185259	0.00652555	0.00417809	0.0110176	0.0027191	0.00529257	0.00323983	0.0152911	0.00340323
-38	0.000576013	0.000559764	0.000467153	0.00045032	0.00660404	0.00214789	0.00760072	0.00447866	0.0132472	0.00289713	0.00642571	0.00359466	0.0184709	0.00374731	-3.91692e-05	8.19965e-05	0.00023384	0.000271086	0.00331361	0.00139495	0.00496643	0.00353992	0.0080011	0.0022935	0.00388573	0.0027227	0.0113254	0.0029179	0.000268422	0.00032088	0.000350496	0.000360703	0.00495882	0.00177142	0.00628357	0.00400929	0.0106241	0.00259532	0.00515572	0.00315868	0.0148982	0.0033326
-37	0.000558635	0.000534013	0.000448777	0.000428425	0.00639916	0.00205462	0.00735733	0.00428665	0.0129091	0.00276017	0.00630063	0.00350187	0.0179958	0.00366091	-4.72186e-05	7.28068e-05	0.000220454	0.000254371	0.00315079	0.00132549	0.00472291	0.00338672	0.00757758	0.00218332	0.00373583	0.0026399	0.0109533	0.00284952	0.000255708	0.00030341	0.000334616	0.000341398	0.00477498	0.00169005	0.00604012	0.00383669	0.0102433	0.00247174	0.00501823	0.00307089	0.0144745	0.00325521
-36	0.000546249	0.000509894	0.000432673	0.000407677	0.00621459	0.00195829	0.00710956	0.00409101	0.012561	0.00262368	0.00617905	0.00340006	0.0175514	0.00356619	-5.511e-05	6.50738e-05	0.000208009	0.00023808	0.00298498	0.00125477	0.00447939	0.00322792	0.00715844	0.00207301	0.00358228	0.00254934	0.0105696	0.00277353	0.00024557	0.000287484	0.000320341	0.000322878	0.00459979	0.00160653	0.00579448	0.00365947	0.0098597	0.00234835	0.00488067	0.0029747	0.0140605	0.00316986
-35	0.000526031	0.000480772	0.000416906	0.000387502	0.0060123	0.00185888	0.00684735	0.00389859	0.0121885	0.00248917	0.00605508	0.00329352	0.0171034	0.0034607	-6.11973e-05	5.6713e-05	0.000196092	0.000221816	0.00280901	0.00118228	0.00423504	0.00306895	0.00672827	0.00196303	0.00342913	0.00245447	0.0101701	0.00268856	0.000232417	0.000268742	0.000306499	0.000304659	0.00441066	0.00152058	0.00554119	0.00348377	0.0094584	0.0022261	0.0047421	0.00287399	0.0136368	0.00307463
-34	0.000503854	0.000447709	0.000401416	0.000368219	0.00580634	0.00175593	0.00656835	0.00371518	0.0118085	0.0023579	0.00590693	0.00318444	0.0166049	0.00334731	-6.43328e-05	4.66063e-05	0.000184673	0.000206098	0.00263096	0.00110629	0.00398906	0.0029125	0.00628909	0.00185454	0.00327372	0.00235636	0.0097439	0.00259569	0.000219761	0.000247158	0.000293045	0.000287159	0.00421865	0.00143111	0.0052787	0.00331384	0.00904881	0.00210622	0.00459033	0.0027704	0.0131744	0.0029715
-33	0.000485194	0.000416303	0.000385605	0.00034838	0.00559511	0.00164857	0.0062813	0.00353602	0.0114278	0.00222886	0.00573151	0.00307124	0.0160533	0.00323015	-6.55894e-05	3.68782e-05	0.000173202	0.000191484	0.00244964	0.00102738	0.00374058	0.00275488	0.00583952	0.0017464	0.00311183	0.00225333	0.00927797	0.00249547	0.000209802	0.000226591	0.000279404	0.000269932	0.00402237	0.00133797	0.00501094	0.00314545	0.00863368	0.00198763	0.00442167	0.00266229	0.0126656	0.00286281
-32	0.000460437	0.000390084	0.000368768	0.000327836	0.0053498	0.00153704	0.00598092	0.00335889	0.011013	0.00210319	0.00552233	0.00294952	0.015427	0.00310823	-6.60702e-05	2.84105e-05	0.000161192	0.000177707	0.00225605	0.000946084	0.00348928	0.00259456	0.00538377	0.00163921	0.00294287	0.0021429	0.00876547	0.002385	0.000197184	0.000209247	0.00026498	0.000252772	0.00380292	0.00124156	0.0047351	0.00297672	0.00819838	0.0018712	0.0042326	0.00254621	0.0120962	0.00274661
-31	0.000431466	0.00036798	0.00035048	0.000307403	0.00508101	0.00142205	0.00565169	0.00318346	0.0105077	0.00197979	0.00528389	0.00282107	0.0147414	0.00297974	-6.56963e-05	2.05849e-05	0.000148704	0.000164325	0.00205096	0.000863771	0.00323885	0.00243128	0.00494699	0.0015321	0.00276277	0.00202614	0.0082212	0.0022627	0.000182885	0.000194282	0.000249592	0.000235864	0.00356599	0.00114291	0.00444527	0.00280737	0.00772733	0.00175594	0.00402333	0.00242361	0.0114813	0.00262122
-30	0.000407853	0.00034626	0.000331201	0.000287707	0.00479925	0.00131023	0.00528995	0.00301217	0.00988002	0.00185767	0.00502717	0.00269073	0.0140074	0.00284789	-6.46999e-05	1.3452e-05	0.000136038	0.000151501	0.00184578	0.000785432	0.00299258	0.00226697	0.00453829	0.00142384	0.00256873	0.00190483	0.00765733	0.00213043	0.000171577	0.000179856	0.00023362	0.000219604	0.00332251	0.00104783	0.00414127	0.00263957	0.00720916	0.00164076	0.00379795	0.00229778	0.0108323	0.00248916
-29	0.000389637	0.000326907	0.000311169	0.000269394	0.00450029	0.00120403	0.004911	0.00284564	0.00917391	0.00173792	0.00476461	0.00255843	0.0132483	0.00271759	-6.31849e-05	8.0499e-06	0.000123253	0.000139465	0.00163908	0.000711355	0.00274843	0.0021031	0.00414519	0.0013155	0.0023635	0.00177937	0.00707348	0.00199186	0.000163226	0.000167478	0.000217211	0.00020443	0.00306969	0.000957694	0.00382971	0.00247437	0.00665955	0.00152671	0.00356405	0.0021689	0.0101609	0.00235472
-28	0.000371878	0.000309359	0.000290877	0.000251873	0.00418169	0.00109783	0.00453553	0.0026806	0.00844536	0.00162203	0.00450515	0.00242421	0.0125008	0.00258721	-6.10606e-05	3.43994e-06	0.000110594	0.000128302	0.00142483	0.000637962	0.00250798	0.00193907	0.00375652	0.00120909	0.00215011	0.0016501	0.00648316	0.00184772	0.000155409	0.000156399	0.000200736	0.000190088	0.00280326	0.000867894	0.00352176	0.00230984	0.00610094	0.00141556	0.00332763	0.00203715	0.00949196	0.00221746
-27	0.000343714	0.000288391	0.000269724	0.000234997	0.00382543	0.000990793	0.00417206	0.00251645	0.00771854	0.00151004	0.00424424	0.00228998	0.0117633	0.00245543	-5.72009e-05	-1.46454e-06	9.7876e-05	0.000117905	0.00121416	0.000565053	0.00227395	0.00177668	0.00336758	0.0011052	0.00193132	0.00151911	0.00589603	0.00169712	0.000143257	0.000143463	0.0001838	0.000176451	0.0025198	0.000777923	0.00322301	0.00214656	0.00554306	0.00130762	0.00308778	0.00190454	0.00882967	0.00207628
-26	0.000308939	0.00026664	0.00024697	0.000219637	0.00344976	0.000886882	0.00382186	0.002354	0.00702933	0.00140197	0.00398033	0.00215626	0.011019	0.00232297	-5.24297e-05	-6.17693e-06	8.50195e-05	0.000108343	0.00101431	0.00049418	0.0020474	0.00161826	0.00299354	0.00100408	0.00171404	0.00138802	0.00530777	0.00154187	0.000128254	0.000130231	0.000165995	0.00016399	0.00223203	0.000690531	0.00293463	0.00198613	0.00501144	0.00120303	0.00284718	0.00177214	0.0081634	0.00193242
-25	0.000280113	0.000250062	0.000225126	0.000205027	0.00311114	0.000788498	0.00349256	0.00219113	0.00640195	0.0012989	0.0037175	0.00202167	0.0102843	0.00218987	-4.83721e-05	-9.68997e-06	7.30244e-05	9.94946e-05	0.000828886	0.000426706	0.00183185	0.00146334	0.00264847	0.00090732	0.00149984	0.00125747	0.00473112	0.0013853	0.00011587	0.000120186	0.000149075	0.000152261	0.00197001	0.000607602	0.0026622	0.00182723	0.00452521	0.00110311	0.00260867	0.00163957	0.00750772	0.00178759
-24	0.000254119	0.000237357	0.000204614	0.000190606	0.00280073	0.000698071	0.00318404	0.00202979	0.00581425	0.00120228	0.00346143	0.00188541	0.00958531	0.00205717	-4.50488e-05	-1.17941e-05	6.18743e-05	9.11815e-05	0.000656342	0.000364641	0.00162818	0.00131395	0.00233094	0.000816038	0.00128948	0.00112841	0.00417486	0.0012307	0.000104535	0.000112782	0.000133244	0.000140894	0.00172853	0.000531356	0.00240611	0.00167187	0.00407259	0.00100916	0.00237546	0.00150691	0.00688008	0.00164394
-23	0.000228778	0.000227817	0.000185376	0.000178237	0.0025187	0.000618087	0.00289242	0.00187445	0.00525398	0.00111334	0.00321947	0.00174917	0.0089293	0.00192416	-4.16182e-05	-1.37153e-05	5.19026e-05	8.32134e-05	0.000499254	0.000309454	0.00143844	0.00117415	0.00204766	0.000731334	0.0010871	0.00100375	0.00364837	0.00108042	9.358e-05	0.000107051	0.000118639	0.000130725	0.00150898	0.000463771	0.00216543	0.0015243	0.00365082	0.000922335	0.00215329	0.00137646	0.00628883	0.00150229
-22	0.000209215	0.000217909	0.00016812	0.000168562	0.00229865	0.000550914	0.00262618	0.00172379	0.00475436	0.00103106	0.00300346	0.00161734	0.00834238	0.0017911	-3.81801e-05	-1.58504e-05	4.34829e-05	7.55128e-05	0.000365429	0.000262288	0.00126629	0.00104434	0.00180002	0.000653526	0.000896033	0.000886323	0.00316164	0.000938494	8.55177e-05	0.000101029	0.000105801	0.000122037	0.00133204	0.000406601	0.00194624	0.00138406	0.00327719	0.000842293	0.00194975	0.00125183	0.00575201	0.0013648
-21	0.000194288	0.00020673	0.000152951	0.000161133	0.00211717	0.000495978	0.00239242	0.00157787	0.00434979	0.000954715	0.0028139	0.00149249	0.00782634	0.00166058	-3.533e-05	-1.79844e-05	3.63658e-05	6.85316e-05	0.000251296	0.000222416	0.00110921	0.000924861	0.00157118	0.000583407	0.000719485	0.000777776	0.0027093	0.000807587	7.94789e-05	9.43729e-05	9.46584e-05	0.000114833	0.00118423	0.000359197	0.00175082	0.00125137	0.00296048	0.000769061	0.00176669	0.00113513	0.00526782	0.00123408
-20	0.000178255	0.000196633	0.000138733	0.000155146	0.00195607	0.000451146	0.00219117	0.00143757	0.00404395	0.000884373	0.00264887	0.00137187	0.00737098	0.00153117	-3.27675e-05	-1.98073e-05	3.00069e-05	6.23936e-05	0.000152051	0.000188274	0.000964721	0.000816586	0.00135578	0.000521522	0.000558165	0.000678537	0.00228353	0.000688755	7.27439e-05	8.84128e-05	8.43697e-05	0.00010877	0.00105406	0.00031971	0.00157795	0.00112708	0.00269986	0.000702947	0.00160352	0.0010252	0.00482725	0.00110996
-19	0.000160837	0.000188646	0.000126407	0.000150216	0.00182308	0.000414487	0.00201467	0.00130492	0.00380307	0.000820102	0.00249623	0.00125243	0.00693935	0.00140093	-3.04014e-05	-2.16177e-05	2.46254e-05	5.7043e-05	7.38959e-05	0.000159493	0.000837706	0.000719533	0.0011648	0.000467541	0.000416149	0.000587908	0.00190234	0.000581706	6.52179e-05	8.35143e-05	7.5516e-05	0.000103629	0.00094849	0.00028699	0.00142619	0.00101222	0.00248394	0.000643821	0.00145619	0.00092017	0.00442085	0.000991317
-18	0.00014531	0.000184987	0.000116972	0.000147172	0.00172091	0.000387922	0.00185614	0.00118341	0.00359919	0.000761893	0.00235494	0.00113538	0.00654586	0.00127335	-2.8835e-05	-2.3628e-05	2.04169e-05	5.26554e-05	1.82004e-05	0.000136179	0.000727886	0.00063423	0.00100575	0.000420631	0.000292838	0.000506229	0.00157027	0.000486489	5.82375e-05	8.06794e-05	6.86945e-05	9.99136e-05	0.000869556	0.00026205	0.00129201	0.00090882	0.00230247	0.000591262	0.00132389	0.000820805	0.00405807	0.000879921
-17	0.000137746	0.000185151	0.000110146	0.000146016	0.00165469	0.000372671	0.00171189	0.00107477	0.00342413	0.000709832	0.00222606	0.00102473	0.00619519	0.0011496	-2.85382e-05	-2.53695e-05	1.71972e-05	4.9169e-05	-2.78621e-05	0.000118668	0.000632488	0.00056135	0.000874548	0.000380347	0.000188366	0.000434758	0.00128077	0.000404841	5.4604e-05	7.98907e-05	6.36717e-05	9.75925e-05	0.000813412	0.00024567	0.00117219	0.000818057	0.00214934	0.00054509	0.00120721	0.000729742	0.00373798	0.000777219
-16	0.000136636	0.000188223	0.00010762	0.000145558	0.00161157	0.000365359	0.00157862	0.000977899	0.00325702	0.000663274	0.0021001	0.000921788	0.0058625	0.00103113	-2.88353e-05	-2.67337e-05	1.50843e-05	4.62597e-05	-6.35124e-05	0.000106496	0.000550857	0.000499299	0.000764535	0.000345778	0.000100709	0.000373011	0.00103503	0.000337127	5.39003e-05	8.07446e-05	6.13524e-05	9.59089e-05	0.000774031	0.000235927	0.00106474	0.000738599	0.00201078	0.000504526	0.00110041	0.000647399	0.00344877	0.000684126
-15	0.000138581	0.000192643	0.000108004	0.000145784	0.00155716	0.000363588	0.00145325	0.000892117	0.00307807	0.000620211	0.00197843	0.00082763	0.00555697	0.000921177	-3.01255e-05	-2.79931e-05	1.35314e-05	4.3825e-05	-8.55092e-05	9.82781e-05	0.000480232	0.000445925	0.000671335	0.000315341	2.73711e-05	0.00032035	0.00082455	0.000281848	5.42278e-05	8.23251e-05	6.07676e-05	9.48045e-05	0.000735823	0.000230933	0.00096674	0.000669021	0.0018747	0.000467776	0.0010029	0.00057399	0.00319076	0.000601512
-14	0.000147121	0.000197453	0.000109733	0.000146614	0.00149459	0.000364824	0.00133444	0.000815603	0.00289755	0.000579711	0.00186672	0.000743157	0.00526839	0.000820034	-3.29825e-05	-2.91435e-05	1.25358e-05	4.17617e-05	-9.78487e-05	9.27644e-05	0.00041895	0.000399735	0.000590733	0.000288573	-3.22406e-05	0.000276585	0.000648038	0.000236566	5.70694e-05	8.41548e-05	6.11346e-05	9.41878e-05	0.000698368	0.000228794	0.000876694	0.000607669	0.00174414	0.000434142	0.000917241	0.000509871	0.00295821	0.0005283
-13	0.000157526	0.000199135	0.000113097	0.000147114	0.00141594	0.000365964	0.00122142	0.000745916	0.00271773	0.000541306	0.00176049	0.000667101	0.0049837	0.000727675	-3.58134e-05	-2.95227e-05	1.19539e-05	4.00134e-05	-0.000102447	8.84565e-05	0.000365018	0.000358837	0.000516059	0.000264724	-8.0695e-05	0.000239916	0.000500908	0.000199714	6.08564e-05	8.48062e-05	6.25253e-05	9.35635e-05	0.000656744	0.00022721	0.000793219	0.000552377	0.0016169	0.000403015	0.0008399	0.000453509	0.0027423	0.000463694
-12	0.000166337	0.000197896	0.000118239	0.000146792	0.00130158	0.00036477	0.00111197	0.00068265	0.002517	0.000503822	0.00165051	0.000597137	0.00467744	0.000643131	-3.80707e-05	-2.92098e-05	1.12738e-05	3.8499e-05	-0.000101211	8.39861e-05	0.000316986	0.000322328	0.000448734	0.000242604	-0.000116756	0.000208622	0.000374884	0.000169098	6.41331e-05	8.43433e-05	6.47566e-05	9.26457e-05	0.000600186	0.000224378	0.00071448	0.000502489	0.00148287	0.000373213	0.000766879	0.000402879	0.00252616	0.000406115
-11	0.000175553	0.000193077	0.000125073	0.000145289	0.00116928	0.000359325	0.00100753	0.000624741	0.00228455	0.000467293	0.00152804	0.000530267	0.00431739	0.000565144	-4.04599e-05	-2.87438e-05	1.04584e-05	3.69628e-05	-9.59909e-05	7.85055e-05	0.000276057	0.000289319	0.000394054	0.000221483	-0.000138171	0.00018093	0.000272692	0.000143339	6.75468e-05	8.21665e-05	6.77659e-05	9.11261e-05	0.000536643	0.000218915	0.000641794	0.00045703	0.0013393	0.000344388	0.000694934	0.000355598	0.00229504	0.000354242
-10	0.000188712	0.000185694	0.000133454	0.000143517	0.00103926	0.000348052	0.000909301	0.000571084	0.00203912	0.000431918	0.00138837	0.000466836	0.00390507	0.000494284	-4.37504e-05	-2.84132e-05	9.74619e-06	3.53796e-05	-8.8141e-05	7.1793e-05	0.000241858	0.00025894	0.000348975	0.000201249	-0.000146109	0.000156267	0.000197808	0.000121773	7.2481e-05	7.86404e-05	7.16001e-05	8.94482e-05	0.000475561	0.000209922	0.000575579	0.000415012	0.00119405	0.000316583	0.00062113	0.000311551	0.00205144	0.000308028
-9	0.000207049	0.000177629	0.000142109	0.000142132	0.000918946	0.000332515	0.00081713	0.000520668	0.00180108	0.000397189	0.00124426	0.000410956	0.00349331	0.000431273	-4.83437e-05	-2.77555e-05	9.07013e-06	3.37557e-05	-8.1593e-05	6.41925e-05	0.000210645	0.00023091	0.000307511	0.000181407	-0.000146157	0.000135513	0.000136318	0.000104453	7.93525e-05	7.49366e-05	7.55895e-05	8.79441e-05	0.000418677	0.000198354	0.000513888	0.000375789	0.0010543	0.000289298	0.000549052	0.000273235	0.00181481	0.000267863
-8	0.000207049	0.000177629	0.000142109	0.000142132	0.000918946	0.000332515	0.00081713	0.000520668	0.00180108	0.000397189	0.00124426	0.000410956	0.00349331	0.000431273	-4.83437e-05	-2.77555e-05	9.07013e-06	3.37557e-05	-8.1593e-05	6.41925e-05	0.000210645	0.00023091	0.000307511	0.000181407	-0.000146157	0.000135513	0.000136318	0.000104453	7.93525e-05	7.49366e-05	7.55895e-05	8.79441e-05	0.000418677	0.000198354	0.000513888	0.000375789	0.0010543	0.000289298	0.000549052	0.000273235	0.00181481	0.000267863
-7	0.000207049	0.000177629	0.000142109	0.000142132	0.000918946	0.000332515	0.00081713	0.000520668	0.00180108	0.000397189	0.00124426	0.000410956	0.00349331	0.000431273	-4.83437e-05	-2.77555e-05	9.07013e-06	3.37557e-05	-8.1593e-05	6.41925e-05	0.000210645	0.00023091	0.000307511	0.000181407	-0.000146157	0.000135513	0.000136318	0.000104453	7.93525e-05	7.49366e-05	7.55895e-05	8.79441e-05	0.000418677	0.000198354	0.000513888	0.000375789	0.0010543	0.000289298	0.000549052	0.000273235	0.00181481	0.000267863
-6	0.000207049	0.000177629	0.000142109	0.000142132	0.000918946	0.000332515	0.00081713	0.000520668	0.00180108	0.000397189	0.00124426	0.000410956	0.00349331	0.000431273	-4.83437e-05	-2.77555e-05	9.07013e-06	3.37557e-05	-8.1593e-05	6.41925e-05	0.000210645	0.00023091	0.000307511	0.000181407	-0.000146157	0.000135513	0.000136318	0.000104453	7.93525e-05	7.49366e-05	7.55895e-05	8.79441e-05	0.000418677	0.000198354	0.000513888	0.000375789	0.0010543	0.000289298	0.000549052	0.000273235	0.00181481	0.000267863
-5	0.000207049	0.000177629	0.000142109	0.000142132	0.000918946	0.000332515	0.00081713	0.000520668	0.00180108	0.000397189	0.00124426	0.000410956	0.00349331	0.000431273	-4.83437e-05	-2.77555e-05	9.07013e-06	3.37557e-05	-8.1593e-05	6.41925e-05	0.000210645	0.00023091	0.000307511	0.000181407	-0.000146157	0.000135513	0.000136318	0.000104453	7.93525e-05	7.49366e-05	7.55895e-05	8.79441e-05	0.000418677	0.000198354	0.000513888	0.000375789	0.0010543	0.000289298	0.000549052	0.000273235	0.00181481	0.000267863
-4	0.000207049	0.000177629	0.000142109	0.000142132	0.000918946	0.000332515	0.00081713	0.000520668	0.00180108	0.000397189	0.00124426	0.000410956	0.00349331	0.000431273	-4.83437e-05	-2.77555e-05	9.07013e-06	3.37557e-05	-8.1593e-05	6.41925e-05	0.000210645	0.00023091	0.000307511	0.000181407	-0.000146157	0.000135513	0.000136318	0.000104453	7.93525e-05	7.49366e-05	7.55895e-05	8.79441e-05	0.000418677	0.000198354	0.000513888	0.000375789	0.0010543	0.000289298	0.000549052	0.000273235	0.00181481	0.000267863
-3	0.000207049	0.000177629	0.000142109	0.000142132	0.000918946	0.000332515	0.00081713	0.000520668	0.00180108	0.000397189	0.00124426	0.000410956	0.00349331	0.000431273	-4.83437e-05	-2.77555e-05	9.07013e-06	3.37557e-05	-8.1593e-05	6.41925e-05	0.000210645	0.00023091	0.000307511	0.000181407	-0.000146157	0.000135513	0.000136318	0.000104453	7.93525e-05	7.49366e-05	7.55895e-05	8.79441e-05	0.000418677	0.000198354	0.000513888	0.000375789	0.0010543	0.000289298	0.000549052	0.000273235	0.00181481	0.000267863
-2	0.000207049	0.000177629	0.000142109	0.000142132	0.000918946	0.000332515	0.00081713	0.000520668	0.00180108	0.000397189	0.00124426	0.000410956	0.00349331	0.000431273	-4.83437e-05	-2.77555e-05	9.07013e-06	3.37557e-05	-8.1593e-05	6.41925e-05	0.000210645	0.00023091	0.000307511	0.000181407	-0.000146157	0.000135513	0.000136318	0.000104453	7.93525e-05	7.49366e-05	7.55895e-05	8.79441e-05	0.000418677	0.000198354	0.000513888	0.000375789	0.0010543	0.000289298	0.000549052	0.000273235	0.00181481	0.000267863
-1	0.000207049	0.000177629	0.000142109	0.000142132	0.000918946	0.000332515	0.00081713	0.000520668	0.00180108	0.000397189	0.00124426	0.000410956	0.00349331	0.000431273	-4.83437e-05	-2.77555e-05	9.07013e-06	3.37557e-05	-8.1593e-05	6.41925e-05	0.000210645	0.00023091	0.000307511	0.000181407	-0.000146157	0.000135513	0.000136318	0.000104453	7.93525e-05	7.49366e-05	7.55895e-05	8.79441e-05	0.000418677	0.000198354	0.000513888	0.000375789	0.0010543	0.000289298	0.000549052	0.000273235	0.00181481	0.000267863
0	0.000207049	0.000177629	0.000142109	0.000142132	0.000918946	0.000332515	0.00081713	0.000520668	0.00180108	0.000397189	0.00124426	0.000410956	0.00349331	0.000431273	-4.83437e-05	-2.77555e-05	9.07013e-06	3.37557e-05	-8.1593e-05	6.41925e-05	0.000210645	0.00023091	0.000307511	0.000181407	-0.000146157	0.000135513	0.000136318	0.000104453	7.93525e-05	7.49366e-05	7.55895e-05	8.79441e-05	0.000418677	0.000198354	0.000513888	0.000375789	0.0010543	0.000289298	0.000549052	0.000273235	0.00181481	0.000267863

## Sheet: PAS metaprofiles
# This table contains values related to the metaprofiles of expression-normalised crosslink coverage around polyA sites. Values marked as "mean CPM per TPM" indicate the mean of expression-normalised coverage across genes in DOWN or Control+UP group, with respect to regulation by phosphorylated LIN28A (Methods). "CI max" and "CI min" indicate the upper and lower limit of 95% confidence interval a…
Values	CI max														CI min														mean CPM per TPM
Protein	LIN28A						PABPC1				PABPC4				LIN28A						PABPC1				PABPC4				LIN28A						PABPC1				PABPC4
Condition	S200A_FCL		S200WT_2iL		S200WT_FCL		KO_FCL		S200WT_FCL		KO_FCL		S200WT_FCL		S200A_FCL		S200WT_2iL		S200WT_FCL		KO_FCL		S200WT_FCL		KO_FCL		S200WT_FCL		S200A_FCL		S200WT_2iL		S200WT_FCL		KO_FCL		S200WT_FCL		KO_FCL		S200WT_FCL
Group	DOWN	UP+CONTROL	DOWN	UP+CONTROL	DOWN	UP+CONTROL	DOWN	UP+CONTROL	DOWN	UP+CONTROL	DOWN	UP+CONTROL	DOWN	UP+CONTROL	DOWN	UP+CONTROL	DOWN	UP+CONTROL	DOWN	UP+CONTROL	DOWN	UP+CONTROL	DOWN	UP+CONTROL	DOWN	UP+CONTROL	DOWN	UP+CONTROL	DOWN	UP+CONTROL	DOWN	UP+CONTROL	DOWN	UP+CONTROL	DOWN	UP+CONTROL	DOWN	UP+CONTROL	DOWN	UP+CONTROL	DOWN	UP+CONTROL
Position
-200	0.000904611	0.000892194	0.00127752	0.00120827	0.002475	0.00112102	0.00312487	0.00268046	0.00741081	0.00234008	0.00120211	0.00108029	0.00229476	0.000833572	0.00319622	0.00276212	0.00266665	0.00226166	0.00524327	0.00190498	0.0051762	0.00361241	0.012596	0.00327452	0.00198191	0.00158512	0.00388321	0.00120269	0.00205042	0.00182716	0.00197209	0.00173496	0.00385913	0.001513	0.00415054	0.00314644	0.0100034	0.0028073	0.00159201	0.00133271	0.00308898	0.00101813
-199	0.000904611	0.000892194	0.00127752	0.00120827	0.002475	0.00112102	0.00312487	0.00268046	0.00741081	0.00234008	0.00120211	0.00108029	0.00229476	0.000833572	0.00319622	0.00276212	0.00266665	0.00226166	0.00524327	0.00190498	0.0051762	0.00361241	0.012596	0.00327452	0.00198191	0.00158512	0.00388321	0.00120269	0.00205042	0.00182716	0.00197209	0.00173496	0.00385913	0.001513	0.00415054	0.00314644	0.0100034	0.0028073	0.00159201	0.00133271	0.00308898	0.00101813
-198	0.000904611	0.000892194	0.00127752	0.00120827	0.002475	0.00112102	0.00312487	0.00268046	0.00741081	0.00234008	0.00120211	0.00108029	0.00229476	0.000833572	0.00319622	0.00276212	0.00266665	0.00226166	0.00524327	0.00190498	0.0051762	0.00361241	0.012596	0.00327452	0.00198191	0.00158512	0.00388321	0.00120269	0.00205042	0.00182716	0.00197209	0.00173496	0.00385913	0.001513	0.00415054	0.00314644	0.0100034	0.0028073	0.00159201	0.00133271	0.00308898	0.00101813
-197	0.000904611	0.000892194	0.00127752	0.00120827	0.002475	0.00112102	0.00312487	0.00268046	0.00741081	0.00234008	0.00120211	0.00108029	0.00229476	0.000833572	0.00319622	0.00276212	0.00266665	0.00226166	0.00524327	0.00190498	0.0051762	0.00361241	0.012596	0.00327452	0.00198191	0.00158512	0.00388321	0.00120269	0.00205042	0.00182716	0.00197209	0.00173496	0.00385913	0.001513	0.00415054	0.00314644	0.0100034	0.0028073	0.00159201	0.00133271	0.00308898	0.00101813
-196	0.000904611	0.000892194	0.00127752	0.00120827	0.002475	0.00112102	0.00312487	0.00268046	0.00741081	0.00234008	0.00120211	0.00108029	0.00229476	0.000833572	0.00319622	0.00276212	0.00266665	0.00226166	0.00524327	0.00190498	0.0051762	0.00361241	0.012596	0.00327452	0.00198191	0.00158512	0.00388321	0.00120269	0.00205042	0.00182716	0.00197209	0.00173496	0.00385913	0.001513	0.00415054	0.00314644	0.0100034	0.0028073	0.00159201	0.00133271	0.00308898	0.00101813
-195	0.000904611	0.000892194	0.00127752	0.00120827	0.002475	0.00112102	0.00312487	0.00268046	0.00741081	0.00234008	0.00120211	0.00108029	0.00229476	0.000833572	0.00319622	0.00276212	0.00266665	0.00226166	0.00524327	0.00190498	0.0051762	0.00361241	0.012596	0.00327452	0.00198191	0.00158512	0.00388321	0.00120269	0.00205042	0.00182716	0.00197209	0.00173496	0.00385913	0.001513	0.00415054	0.00314644	0.0100034	0.0028073	0.00159201	0.00133271	0.00308898	0.00101813
-194	0.000904611	0.000892194	0.00127752	0.00120827	0.002475	0.00112102	0.00312487	0.00268046	0.00741081	0.00234008	0.00120211	0.00108029	0.00229476	0.000833572	0.00319622	0.00276212	0.00266665	0.00226166	0.00524327	0.00190498	0.0051762	0.00361241	0.012596	0.00327452	0.00198191	0.00158512	0.00388321	0.00120269	0.00205042	0.00182716	0.00197209	0.00173496	0.00385913	0.001513	0.00415054	0.00314644	0.0100034	0.0028073	0.00159201	0.00133271	0.00308898	0.00101813
-193	0.000904611	0.000892194	0.00127752	0.00120827	0.002475	0.00112102	0.00312487	0.00268046	0.00741081	0.00234008	0.00120211	0.00108029	0.00229476	0.000833572	0.00319622	0.00276212	0.00266665	0.00226166	0.00524327	0.00190498	0.0051762	0.00361241	0.012596	0.00327452	0.00198191	0.00158512	0.00388321	0.00120269	0.00205042	0.00182716	0.00197209	0.00173496	0.00385913	0.001513	0.00415054	0.00314644	0.0100034	0.0028073	0.00159201	0.00133271	0.00308898	0.00101813
-192	0.000904611	0.000892194	0.00127752	0.00120827	0.002475	0.00112102	0.00312487	0.00268046	0.00741081	0.00234008	0.00120211	0.00108029	0.00229476	0.000833572	0.00319622	0.00276212	0.00266665	0.00226166	0.00524327	0.00190498	0.0051762	0.00361241	0.012596	0.00327452	0.00198191	0.00158512	0.00388321	0.00120269	0.00205042	0.00182716	0.00197209	0.00173496	0.00385913	0.001513	0.00415054	0.00314644	0.0100034	0.0028073	0.00159201	0.00133271	0.00308898	0.00101813
-191	0.000904611	0.000892194	0.00127752	0.00120827	0.002475	0.00112102	0.00312487	0.00268046	0.00741081	0.00234008	0.00120211	0.00108029	0.00229476	0.000833572	0.00319622	0.00276212	0.00266665	0.00226166	0.00524327	0.00190498	0.0051762	0.00361241	0.012596	0.00327452	0.00198191	0.00158512	0.00388321	0.00120269	0.00205042	0.00182716	0.00197209	0.00173496	0.00385913	0.001513	0.00415054	0.00314644	0.0100034	0.0028073	0.00159201	0.00133271	0.00308898	0.00101813
-190	0.000904611	0.000892194	0.00127752	0.00120827	0.002475	0.00112102	0.00312487	0.00268046	0.00741081	0.00234008	0.00120211	0.00108029	0.00229476	0.000833572	0.00319622	0.00276212	0.00266665	0.00226166	0.00524327	0.00190498	0.0051762	0.00361241	0.012596	0.00327452	0.00198191	0.00158512	0.00388321	0.00120269	0.00205042	0.00182716	0.00197209	0.00173496	0.00385913	0.001513	0.00415054	0.00314644	0.0100034	0.0028073	0.00159201	0.00133271	0.00308898	0.00101813
-189	0.000902955	0.000917897	0.00126508	0.00122032	0.00245697	0.00113195	0.00313108	0.0026837	0.00739752	0.00234079	0.00120559	0.00108523	0.00228799	0.000836164	0.00315986	0.00268552	0.0026585	0.00221099	0.00517563	0.00188357	0.00511923	0.00362423	0.0124714	0.00328597	0.00197509	0.00159043	0.00385577	0.00121365	0.00203141	0.00180171	0.00196179	0.00171566	0.0038163	0.00150776	0.00412515	0.00315397	0.00993445	0.00281338	0.00159034	0.00133783	0.00307188	0.00102491
-188	0.000903148	0.000939822	0.0012536	0.00122936	0.00243625	0.00114221	0.00313262	0.0026878	0.00738005	0.00234307	0.00120743	0.0010904	0.00227338	0.000837729	0.0031312	0.00262078	0.0026547	0.00215992	0.00511537	0.00186418	0.005063	0.00363825	0.0123594	0.00329492	0.00196974	0.00159475	0.0038245	0.00122221	0.00201717	0.0017803	0.00195415	0.00169464	0.00377581	0.00150319	0.00409781	0.00316303	0.0098697	0.00281899	0.00158859	0.00134258	0.00304894	0.00102997
-187	0.00090316	0.000953976	0.00124277	0.00123768	0.00242273	0.00115287	0.00313099	0.00269403	0.00735286	0.00234651	0.00120766	0.00109698	0.00225374	0.000838317	0.00310579	0.002565	0.00265351	0.00211958	0.00507573	0.00185323	0.00501219	0.00365615	0.012266	0.00330572	0.00196545	0.00160243	0.00379061	0.00122896	0.00200448	0.00175949	0.00194814	0.00167863	0.00374923	0.00150305	0.00407159	0.00317509	0.00980945	0.00282612	0.00158655	0.0013497	0.00302218	0.00103364
-186	0.000903473	0.000961403	0.00123253	0.00124585	0.00241733	0.00116467	0.00312601	0.00270156	0.00731398	0.00235168	0.00120859	0.0011065	0.00223334	0.0008389	0.00307085	0.00252109	0.00264303	0.00209579	0.00504438	0.00185221	0.00496502	0.00367803	0.0121676	0.00331858	0.00196384	0.00161637	0.00375655	0.00123535	0.00198716	0.00174125	0.00193778	0.00167082	0.00373086	0.00150844	0.00404552	0.00318979	0.00974081	0.00283513	0.00158621	0.00136143	0.00299495	0.00103713
-185	0.000913183	0.000967757	0.00122372	0.00125505	0.00241775	0.00117685	0.00311985	0.00270922	0.00727184	0.00235996	0.00121165	0.00111805	0.00221743	0.000840416	0.00304921	0.00249639	0.0026264	0.00208236	0.00502369	0.00185998	0.00492391	0.0036962	0.0120769	0.00332661	0.00196586	0.00163121	0.00373112	0.0012405	0.0019812	0.00173207	0.00192506	0.00166871	0.00372072	0.00151842	0.00402188	0.00320271	0.00967439	0.00284328	0.00158876	0.00137463	0.00297428	0.00104046
-184	0.000937389	0.000974774	0.0012195	0.00126568	0.00242874	0.00118775	0.00311267	0.0027197	0.0072349	0.00237582	0.00121545	0.00113032	0.00220768	0.000843685	0.00306925	0.00246936	0.00260815	0.00206662	0.00501588	0.00186707	0.00488714	0.00370514	0.0120155	0.0033209	0.00196873	0.00164244	0.00371775	0.00124122	0.00200332	0.00172207	0.00191383	0.00166615	0.00372231	0.00152741	0.00399991	0.00321242	0.0096252	0.00284836	0.00159209	0.00138638	0.00296272	0.00104245
-183	0.000972347	0.000976174	0.00122377	0.00127199	0.00245203	0.00120022	0.00310927	0.00273539	0.00721134	0.00239771	0.00121892	0.00114266	0.00220448	0.000848731	0.00312306	0.0024435	0.00258306	0.00204748	0.00500803	0.00187498	0.00486433	0.00371421	0.0119856	0.00331244	0.00197239	0.00165152	0.00371608	0.00124059	0.0020477	0.00170984	0.00190342	0.00165974	0.00373003	0.0015376	0.0039868	0.0032248	0.00959846	0.00285508	0.00159565	0.00139709	0.00296028	0.00104466
-182	0.000999898	0.000970036	0.0012301	0.00127418	0.00248366	0.0012145	0.00311121	0.00275046	0.00720134	0.00241862	0.00122329	0.00115465	0.00220831	0.00085274	0.00317554	0.00241769	0.00255374	0.00202684	0.00502536	0.00188729	0.00486698	0.00372324	0.0119667	0.00330765	0.00198287	0.00165996	0.0037212	0.00123908	0.00208772	0.00169386	0.00189192	0.00165051	0.00375451	0.0015509	0.0039891	0.00323685	0.009584	0.00286313	0.00160308	0.00140731	0.00296476	0.00104591
-181	0.00101824	0.000961486	0.00123145	0.00127606	0.00252062	0.00122617	0.00311592	0.00276528	0.00720317	0.00243887	0.00122844	0.00116611	0.00221307	0.000855267	0.00320517	0.00238043	0.0025135	0.00200269	0.00507235	0.00189776	0.00489024	0.00373572	0.0119476	0.00330923	0.0020001	0.00166845	0.00372596	0.00123632	0.00211171	0.00167096	0.00187247	0.00163938	0.00379649	0.00156197	0.00400308	0.0032505	0.00957538	0.00287405	0.00161427	0.00141728	0.00296952	0.0010458
-180	0.00102353	0.000950031	0.00122883	0.0012767	0.00255272	0.00123635	0.00312537	0.00278308	0.00721508	0.00245915	0.00123434	0.00117631	0.00221872	0.000857191	0.00320129	0.00233923	0.00245573	0.0019771	0.00511094	0.00190575	0.00492706	0.00375482	0.0119399	0.0033188	0.00202007	0.00167614	0.00373583	0.00123421	0.00211241	0.00164463	0.00184228	0.0016269	0.00383183	0.00157105	0.00402622	0.00326895	0.00957749	0.00288897	0.0016272	0.00142622	0.00297727	0.0010457
-179	0.00101465	0.000935972	0.00122473	0.00127703	0.00258271	0.00124688	0.00314058	0.00280102	0.00723978	0.00247791	0.00123872	0.00118414	0.00222978	0.000857575	0.00317516	0.00229471	0.00239148	0.00195292	0.00514546	0.00191293	0.00496978	0.00377213	0.0119562	0.00333138	0.00203603	0.00168122	0.00375673	0.00123151	0.0020949	0.00161534	0.00180811	0.00161498	0.00386408	0.0015799	0.00405518	0.00328658	0.00959797	0.00290464	0.00163737	0.00143268	0.00299325	0.00104454
-178	0.00100876	0.00092562	0.00121754	0.00127853	0.00261963	0.00125734	0.0031592	0.00281764	0.00726993	0.00249677	0.00124276	0.00119015	0.00224821	0.000857487	0.0031495	0.00225402	0.00232505	0.0019319	0.00518863	0.00192214	0.00501665	0.00378462	0.0119871	0.00334578	0.00204934	0.00168467	0.00378886	0.00122882	0.00207913	0.00158982	0.0017713	0.00160521	0.00390413	0.00158974	0.00408793	0.00330113	0.00962851	0.00292128	0.00164605	0.00143741	0.00301854	0.00104315
-177	0.00101255	0.000924486	0.00120962	0.00128048	0.00265619	0.00126597	0.00317975	0.00283361	0.00730796	0.00251537	0.00124873	0.00119321	0.0022706	0.000857948	0.00313189	0.00222355	0.00226212	0.00191167	0.00522719	0.00193135	0.00506788	0.0037959	0.0120234	0.00336082	0.0020641	0.00168468	0.00382752	0.00122703	0.00207222	0.00157402	0.00173587	0.00159608	0.00394169	0.00159866	0.00412382	0.00331476	0.00966568	0.0029381	0.00165641	0.00143895	0.00304906	0.00104249
-176	0.00102337	0.000928218	0.00120226	0.00128177	0.00268879	0.00127259	0.00320199	0.00284689	0.00735848	0.00253002	0.0012546	0.00119181	0.00229075	0.000857217	0.00312885	0.00219964	0.00221244	0.00189082	0.00526631	0.00193871	0.0051237	0.00379941	0.0120786	0.00337379	0.00208094	0.00167832	0.00386442	0.00122442	0.00207611	0.00156393	0.00170735	0.00158629	0.00397755	0.00160565	0.00416285	0.00332315	0.00971854	0.0029519	0.00166777	0.00143507	0.00307759	0.00104082
-175	0.00102772	0.000930559	0.00119537	0.00128189	0.00271585	0.00127815	0.00322402	0.00285884	0.00741714	0.00254053	0.00125891	0.001187	0.00230441	0.000854543	0.00311638	0.00217681	0.00216853	0.00186995	0.00529451	0.00194519	0.00518428	0.00379911	0.0121462	0.0033873	0.00210154	0.00166856	0.00389172	0.00122099	0.00207205	0.00155368	0.00168195	0.00157592	0.00400518	0.00161167	0.00420415	0.00332897	0.00978165	0.00296391	0.00168023	0.00142778	0.00309807	0.00103777
-174	0.00102108	0.000930334	0.00118914	0.00128007	0.0027286	0.00128354	0.00324048	0.00286806	0.00747882	0.00254373	0.00126189	0.00117952	0.0023134	0.000849757	0.00308599	0.00215232	0.00212977	0.00184723	0.0052966	0.00195114	0.0052534	0.00380156	0.012205	0.00340351	0.00212785	0.00165799	0.00391213	0.00121794	0.00205353	0.00154133	0.00165945	0.00156365	0.0040126	0.00161734	0.00424694	0.00333481	0.00984191	0.00297362	0.00169487	0.00141876	0.00311277	0.00103385
-173	0.00100495	0.000929715	0.00117982	0.00127859	0.00272899	0.00128755	0.00324611	0.00287078	0.00753746	0.00253956	0.00126288	0.00117104	0.00231991	0.000843255	0.00304095	0.00212927	0.00210063	0.00182432	0.00529073	0.00195361	0.00533081	0.00379843	0.0122523	0.0034123	0.00216183	0.00164699	0.00392879	0.00121367	0.00202295	0.00152949	0.00164022	0.00155146	0.00400986	0.00162058	0.00428846	0.00333461	0.00989491	0.00297593	0.00171235	0.00140901	0.00312435	0.00102846
-172	0.000988561	0.000930736	0.00117001	0.00127833	0.00272754	0.00129093	0.00324732	0.00287309	0.00759364	0.00253645	0.00126237	0.00116453	0.00232551	0.00083724	0.00299492	0.0021186	0.00207739	0.0018112	0.00528013	0.00195412	0.00540803	0.00379414	0.0123053	0.00341646	0.00219932	0.00163848	0.00394737	0.00120911	0.00199174	0.00152467	0.0016237	0.00154476	0.00400383	0.00162253	0.00432768	0.00333361	0.0099495	0.00297646	0.00173084	0.0014015	0.00313644	0.00102317
-171	0.000977817	0.00093375	0.00116557	0.00127886	0.00273025	0.00129842	0.00325121	0.00287612	0.00765404	0.00253485	0.00126237	0.00116097	0.00233684	0.000833516	0.00297164	0.00212002	0.00206571	0.00180827	0.00526851	0.00195893	0.00547646	0.00379257	0.0123811	0.00342195	0.00223428	0.00163406	0.00397531	0.00120704	0.00197473	0.00152688	0.00161564	0.00154356	0.00399938	0.00162867	0.00436384	0.00333434	0.0100176	0.0029784	0.00174833	0.00139751	0.00315607	0.00102028
-170	0.00097437	0.000938496	0.00116743	0.00128018	0.00274081	0.00130987	0.00325594	0.00287766	0.00772112	0.00253269	0.00126062	0.00115921	0.00235065	0.000831649	0.00296935	0.00212454	0.00207022	0.00180718	0.00527304	0.00196876	0.0055355	0.00379236	0.0124801	0.00342577	0.00226367	0.00163344	0.00400383	0.00120539	0.00197186	0.00153152	0.00161882	0.00154368	0.00400692	0.00163932	0.00439572	0.00333501	0.0101006	0.00297923	0.00176214	0.00139632	0.00317724	0.00101852
-169	0.000978444	0.000945065	0.00117164	0.00128146	0.00275415	0.00132256	0.00325985	0.00288196	0.0077842	0.00253193	0.00125745	0.00115889	0.00235861	0.00083188	0.00297791	0.00213136	0.00208063	0.00180759	0.00530549	0.0019814	0.0055939	0.00379797	0.0125797	0.00343009	0.00229225	0.00163613	0.00402735	0.00120492	0.00197818	0.00153821	0.00162614	0.00154453	0.00402982	0.00165198	0.00442688	0.00333997	0.0101819	0.00298101	0.00177485	0.00139751	0.00319298	0.0010184
-168	0.000974943	0.00095127	0.00117797	0.00128337	0.00276498	0.00133542	0.00326453	0.00288858	0.00784787	0.00253002	0.00125579	0.00115868	0.00236655	0.000833468	0.0029726	0.00213851	0.00208232	0.00181148	0.00535556	0.00199315	0.00565738	0.00380844	0.0126816	0.00343243	0.00232519	0.00163873	0.00405667	0.0012056	0.00197377	0.00154489	0.00163014	0.00154743	0.00406027	0.00166429	0.00446096	0.00334851	0.0102648	0.00298122	0.00179049	0.00139871	0.00321161	0.00101954
-167	0.00095427	0.000951005	0.00118424	0.00128523	0.00277331	0.00135059	0.00326775	0.00289441	0.00790946	0.0025256	0.00125306	0.00115892	0.00237908	0.000835192	0.00293817	0.00214297	0.00207313	0.00181589	0.00540352	0.00200508	0.00572723	0.00381676	0.0128018	0.00342745	0.00235828	0.00164081	0.00409599	0.00120556	0.00194622	0.00154699	0.00162869	0.00155056	0.00408841	0.00167784	0.00449749	0.00335558	0.0103556	0.00297653	0.00180567	0.00139986	0.00323753	0.00102038
-166	0.000919491	0.000946854	0.00118905	0.00128756	0.00277814	0.00136794	0.00327003	0.00289999	0.00796426	0.00252192	0.00124972	0.00116087	0.00239282	0.000837644	0.00288271	0.00214748	0.00206276	0.00182029	0.00544652	0.00201936	0.00580422	0.00382578	0.0129363	0.00341648	0.0023888	0.00164451	0.00413823	0.0012042	0.0019011	0.00154717	0.00162591	0.00155392	0.00411233	0.00169365	0.00453713	0.00336289	0.0104503	0.0029692	0.00181926	0.00140269	0.00326552	0.00102092
-165	0.000886251	0.000944282	0.00119386	0.00129088	0.00278711	0.0013848	0.00327373	0.00290313	0.00801779	0.00252052	0.00124806	0.00116442	0.00241002	0.000840945	0.00283081	0.00215447	0.00205899	0.0018261	0.00550614	0.0020343	0.00588054	0.00383438	0.0130713	0.00340513	0.00241364	0.00165019	0.00418445	0.00120196	0.00185853	0.00154938	0.00162642	0.00155849	0.00414663	0.00170955	0.00457714	0.00336875	0.0105445	0.00296283	0.00183085	0.00140731	0.00329724	0.00102145
-164	0.000856237	0.000944715	0.00119742	0.00129657	0.00280842	0.00140066	0.00328685	0.00290567	0.00807424	0.00252256	0.00124933	0.00116905	0.00243198	0.000845324	0.00277103	0.00217292	0.0020563	0.00183777	0.00559841	0.00205035	0.00594193	0.00384159	0.0132036	0.00339666	0.00242779	0.00165709	0.0042357	0.00120071	0.00181363	0.00155882	0.00162686	0.00156717	0.00420341	0.00172551	0.00461439	0.00337363	0.0106389	0.00295961	0.00183856	0.00141307	0.00333384	0.00102302
-163	0.000828587	0.000947722	0.0012013	0.00130469	0.00284326	0.00141576	0.0033152	0.00291148	0.0081406	0.00252796	0.00125633	0.00117261	0.00245642	0.000850086	0.00270583	0.00219858	0.00205256	0.00185751	0.00571446	0.00206885	0.00597686	0.00385122	0.0133401	0.00339161	0.00242789	0.00166295	0.00428667	0.00119976	0.00176721	0.00157315	0.00162693	0.0015811	0.00427886	0.00174231	0.00464603	0.00338135	0.0107403	0.00295978	0.00184211	0.00141778	0.00337155	0.00102492
-162	0.000805551	0.000952047	0.00120648	0.00131198	0.00288293	0.00143117	0.00334852	0.00291628	0.00821003	0.00253141	0.00126756	0.00117292	0.00248103	0.00085469	0.00264895	0.00222343	0.00205715	0.00187765	0.00587555	0.00208985	0.00599254	0.00385833	0.013479	0.00338373	0.0024185	0.00166504	0.00433733	0.00119859	0.00172725	0.00158774	0.00163182	0.00159481	0.00437924	0.00176051	0.00467053	0.0033873	0.0108445	0.00295757	0.00184303	0.00141898	0.00340918	0.00102664
-161	0.000781262	0.000954808	0.00121161	0.0013174	0.00292227	0.00144359	0.00338015	0.00291852	0.00827441	0.00253168	0.00128118	0.00116953	0.00250366	0.000857832	0.00258238	0.00224469	0.00206744	0.0018929	0.00607769	0.00210767	0.00600638	0.00385564	0.0136152	0.00336408	0.00241442	0.00166075	0.00439153	0.00119491	0.00168182	0.00159975	0.00163952	0.00160515	0.00449998	0.00177563	0.00469327	0.00338708	0.0109448	0.00294788	0.0018478	0.00141514	0.00344759	0.00102637
-160	0.000754559	0.000954936	0.00121525	0.00132289	0.00296472	0.00145132	0.00341262	0.00291883	0.00833252	0.00253203	0.00129873	0.0011647	0.0025261	0.00085971	0.00250412	0.00226252	0.00207541	0.00190806	0.00628526	0.00212	0.00602949	0.00384402	0.0137467	0.00333788	0.00242231	0.00165107	0.00445394	0.00118957	0.00162934	0.00160873	0.00164533	0.00161547	0.00462499	0.00178566	0.00472106	0.00338142	0.0110396	0.00293495	0.00186052	0.00140789	0.00349002	0.00102464
-159	0.000727623	0.000953614	0.00121881	0.00132932	0.00301204	0.00145827	0.00344592	0.00291353	0.00838358	0.00253155	0.00131975	0.00115996	0.00255338	0.000861584	0.00242472	0.00227813	0.00208313	0.00192237	0.0064591	0.00213195	0.00605779	0.00382566	0.0138769	0.00331295	0.00243786	0.00163976	0.00451831	0.00118475	0.00157617	0.00161587	0.00165097	0.00162584	0.00473557	0.00179511	0.00475185	0.00336959	0.0111302	0.00292225	0.00187881	0.00139986	0.00353584	0.00102317
-158	0.00070613	0.000950013	0.00122312	0.00133609	0.00305829	0.00146713	0.0034767	0.00290436	0.00841705	0.00253232	0.00133986	0.00115748	0.00257648	0.000863964	0.00235888	0.00228865	0.00209966	0.00193346	0.00658466	0.00214808	0.00607746	0.00380238	0.0139838	0.0032922	0.00245075	0.00163202	0.00456696	0.00118116	0.0015325	0.00161933	0.00166139	0.00163477	0.00482147	0.0018076	0.00477708	0.00335337	0.0112004	0.00291226	0.0018953	0.00139475	0.00357172	0.00102256
-157	0.000697048	0.000951675	0.0012298	0.00134322	0.00310397	0.00147543	0.00350961	0.00289482	0.00843684	0.00253681	0.00135882	0.00115712	0.00258882	0.000866905	0.00232057	0.00229565	0.00212164	0.00194402	0.00669808	0.00216483	0.00607819	0.00377942	0.0140315	0.00327924	0.00245804	0.00162833	0.0045961	0.00117947	0.00150881	0.00162366	0.00167572	0.00164362	0.00490102	0.00182013	0.0047939	0.00333712	0.0112342	0.00290803	0.00190843	0.00139273	0.00359246	0.00102319
-156	0.000699462	0.000958725	0.00123744	0.00134946	0.00316004	0.00148205	0.00354512	0.00288661	0.00845258	0.00254309	0.00137717	0.00115759	0.00259798	0.000869735	0.00229859	0.00229653	0.00213775	0.00195257	0.00681623	0.00217802	0.00605194	0.00375856	0.0140159	0.00327456	0.00245973	0.00162686	0.0046143	0.00117967	0.00149903	0.00162763	0.0016876	0.00165101	0.00498814	0.00183003	0.00479853	0.00332258	0.0112343	0.00290882	0.00191845	0.00139222	0.00360614	0.0010247
-155	0.000705189	0.000963248	0.00124254	0.00135471	0.00322389	0.00148977	0.00357822	0.00288226	0.00845691	0.00254956	0.00139378	0.00115865	0.00260426	0.000872679	0.0022828	0.00228872	0.00214621	0.00196066	0.00693145	0.00219084	0.00600503	0.00374219	0.0139567	0.00327462	0.00245946	0.00162716	0.00462222	0.00118192	0.00149399	0.00162599	0.00169437	0.00165768	0.00507767	0.0018403	0.00479162	0.00331222	0.0112068	0.00291209	0.00192662	0.00139291	0.00361324	0.0010273
-154	0.000713258	0.000958005	0.00124692	0.00135127	0.00328555	0.00149937	0.00360358	0.00287853	0.00844664	0.00255647	0.00140615	0.00116002	0.00260452	0.00087625	0.00228499	0.00230399	0.00215177	0.00198872	0.00702906	0.00220808	0.00595144	0.00372662	0.013869	0.00327733	0.0024618	0.00162854	0.00461467	0.00118576	0.00149913	0.001631	0.00169935	0.00166999	0.0051573	0.00185372	0.00477751	0.00330257	0.0111578	0.0029169	0.00193398	0.00139428	0.00360959	0.001031
-153	0.000723543	0.000942102	0.00125013	0.00133312	0.00333603	0.00151219	0.0036161	0.00287319	0.0084141	0.00256497	0.00141139	0.00116305	0.00260035	0.000881292	0.00229893	0.00237231	0.00215471	0.00205198	0.00711275	0.00223513	0.00590175	0.00370998	0.0137567	0.0032858	0.00246612	0.00163208	0.00459921	0.00119235	0.00151124	0.0016572	0.00170242	0.00169255	0.00522439	0.00187366	0.00475893	0.00329158	0.0110854	0.00292539	0.00193875	0.00139757	0.00359978	0.00103682
-152	0.000735728	0.000923584	0.00125053	0.00131051	0.00338514	0.00152709	0.0036214	0.00287029	0.00836487	0.00257768	0.00141033	0.00116799	0.00259436	0.000887796	0.00232688	0.00247243	0.00214899	0.00213953	0.00714232	0.00226769	0.00586038	0.00370237	0.0136258	0.0033037	0.00247113	0.00163953	0.00457909	0.00120178	0.0015313	0.00169801	0.00169976	0.00172502	0.00526373	0.00189739	0.00474089	0.00328633	0.0109953	0.00294069	0.00194073	0.00140376	0.00358672	0.00104479
-151	0.000749721	0.00090767	0.00124717	0.00128925	0.00343182	0.00154356	0.00362231	0.00287343	0.00830179	0.00259511	0.00140312	0.00117531	0.00258567	0.000895447	0.00237473	0.00258409	0.00213525	0.00224239	0.00710268	0.00230229	0.00581868	0.00371216	0.0134632	0.00333376	0.00246452	0.00165416	0.00454269	0.00121381	0.00156223	0.00174588	0.00169121	0.00176582	0.00526725	0.00192292	0.0047205	0.00329279	0.0108825	0.00296444	0.00193382	0.00141474	0.00356418	0.00105463
-150	0.000762324	0.00089546	0.0012403	0.00126708	0.00346025	0.00156168	0.0036138	0.00288238	0.00822423	0.00261471	0.00139087	0.00118377	0.00257253	0.000903814	0.00243693	0.00270918	0.00211913	0.00235906	0.00702374	0.00233878	0.00575837	0.00373424	0.013253	0.00337157	0.00244137	0.00167331	0.00448455	0.00122762	0.00159963	0.00180232	0.00167971	0.00181307	0.005242	0.00195023	0.00468609	0.00330831	0.0107386	0.00299314	0.00191612	0.00142854	0.00352854	0.00106572
-149	0.000772986	0.000881491	0.00123127	0.00124169	0.00347768	0.00157744	0.00359509	0.00289652	0.00814511	0.00263546	0.00137406	0.00119217	0.00255191	0.000911739	0.00251851	0.00285699	0.00210546	0.00249341	0.00694993	0.00237107	0.00567815	0.00376219	0.0130018	0.0034076	0.00240518	0.0016925	0.00440953	0.00124118	0.00164575	0.00186924	0.00166836	0.00186755	0.00521381	0.00197425	0.00463662	0.00332935	0.0105735	0.00302153	0.00188962	0.00144234	0.00348072	0.00107646
-148	0.000780134	0.00086412	0.00121976	0.00121133	0.00349898	0.00158872	0.00357001	0.00291503	0.00807159	0.00265647	0.00135546	0.00119985	0.002528	0.000918759	0.00262464	0.00303487	0.0020954	0.00263807	0.00692379	0.00239484	0.0055874	0.00379533	0.0127332	0.00343995	0.00236346	0.00171024	0.00432942	0.00125355	0.00170239	0.00194949	0.00165758	0.0019247	0.00521139	0.00199178	0.00457871	0.00335518	0.0104024	0.00304821	0.00185946	0.00145504	0.00342871	0.00108615
-147	0.000779967	0.00084047	0.00120551	0.00117793	0.00351668	0.00159777	0.00353975	0.00293689	0.00800502	0.00267743	0.0013378	0.00120759	0.00250965	0.000925962	0.00273477	0.00323102	0.00208842	0.00278227	0.0069087	0.00241402	0.00549673	0.00383274	0.0124897	0.00347171	0.00232292	0.00172721	0.00425359	0.00126581	0.00175737	0.00203574	0.00164697	0.0019801	0.00521269	0.00200589	0.00451824	0.00338481	0.0102473	0.00307457	0.00183036	0.0014674	0.00338162	0.00109589
-146	0.00077092	0.000812556	0.00119189	0.00114454	0.00351946	0.00160766	0.00350688	0.00296354	0.0079461	0.00270177	0.00132128	0.00121604	0.0024939	0.00093534	0.00282985	0.00344051	0.00208637	0.00292962	0.00688292	0.00243595	0.00542865	0.00387865	0.0123032	0.00350554	0.00228706	0.00174949	0.00418587	0.00128082	0.00180038	0.00212653	0.00163913	0.00203708	0.00520119	0.00202181	0.00446776	0.0034211	0.0101247	0.00310365	0.00180417	0.00148277	0.00333989	0.00110808
-145	0.000754367	0.000787561	0.00118123	0.00111174	0.00350877	0.00161882	0.00348146	0.00299363	0.0079017	0.00273011	0.00130622	0.00122604	0.00248342	0.000946277	0.00290628	0.00366882	0.00208653	0.00307867	0.00684597	0.00246027	0.00538981	0.00393207	0.012182	0.00354138	0.00225525	0.00177824	0.004138	0.00129804	0.00183032	0.00222819	0.00163388	0.0020952	0.00517737	0.00203955	0.00443563	0.00346285	0.0100418	0.00313575	0.00178074	0.00150214	0.00331071	0.00112216
-144	0.000735703	0.000773629	0.00117097	0.00109131	0.00349116	0.00163033	0.00346775	0.00302762	0.00787164	0.00275995	0.0012965	0.00123826	0.00248415	0.000956916	0.00297039	0.00386549	0.00208595	0.00319119	0.00680122	0.00247878	0.00537326	0.00399253	0.0121136	0.00357815	0.00223056	0.0018095	0.00411662	0.00131502	0.00185305	0.00231956	0.00162846	0.00214125	0.00514619	0.00205456	0.0044205	0.00351007	0.00999262	0.00316905	0.00176353	0.00152388	0.00330038	0.00113597
-143	0.000719709	0.000772036	0.00116103	0.00109212	0.00347709	0.00163925	0.00346563	0.00306681	0.0078612	0.00279073	0.00129516	0.00125149	0.00249232	0.000966708	0.00303581	0.00398419	0.00208796	0.00323207	0.00675195	0.00248089	0.00537435	0.00406202	0.012086	0.00361512	0.00221786	0.00184267	0.00411204	0.00133111	0.00187776	0.00237811	0.00162449	0.00216209	0.00511452	0.00206007	0.00441999	0.00356441	0.0099736	0.00320292	0.00175651	0.00154708	0.00330218	0.00114891
-142	0.00070205	0.000771394	0.00115218	0.00110052	0.00346709	0.0016441	0.0034725	0.00310806	0.00786712	0.0028204	0.00130034	0.00126522	0.00250306	0.000975643	0.00308836	0.00405398	0.00209027	0.00322576	0.00672439	0.00247	0.00538302	0.00412856	0.0120793	0.00365031	0.00221209	0.00187428	0.00411732	0.00134685	0.00189521	0.00241269	0.00162122	0.00216314	0.00509574	0.00205705	0.00442776	0.00361831	0.00997321	0.00323536	0.00175622	0.00156975	0.00331019	0.00116124
-141	0.000684036	0.000768861	0.00114522	0.00110897	0.00346348	0.001647	0.00348723	0.00314794	0.00789169	0.00284827	0.00131026	0.00127796	0.00251767	0.000984507	0.00312673	0.00411297	0.00209144	0.00319678	0.00674359	0.00245592	0.00540075	0.00418568	0.0121101	0.00368364	0.00221528	0.00189908	0.00414046	0.00136284	0.00190538	0.00244091	0.00161833	0.00215287	0.00510354	0.00205146	0.00444399	0.00366681	0.0100009	0.00326596	0.00176277	0.00158852	0.00332907	0.00117367
-140	0.000669619	0.000765422	0.0011407	0.00111909	0.0034733	0.00164929	0.00351613	0.00318472	0.00794328	0.0028737	0.00132471	0.00128998	0.00254144	0.000992998	0.00314853	0.00415375	0.0020899	0.00314223	0.00680514	0.00244099	0.00544447	0.00423785	0.0122114	0.00371395	0.00223233	0.00192045	0.00419056	0.00137793	0.00190907	0.00245959	0.0016153	0.00213066	0.00513922	0.00204514	0.0044803	0.00371128	0.0100773	0.00329383	0.00177852	0.00160522	0.003366	0.00118547
-139	0.000657822	0.000768892	0.00113908	0.00113376	0.00348866	0.00165477	0.00356314	0.00321925	0.00801745	0.00289778	0.00134489	0.00130246	0.00257614	0.00100169	0.00313422	0.00415961	0.00208117	0.00305927	0.00686482	0.00243177	0.00552601	0.00428703	0.0123909	0.00374498	0.00226649	0.00194296	0.00426833	0.00139277	0.00189602	0.00246425	0.00161013	0.00209651	0.00517674	0.00204327	0.00454457	0.00375314	0.0102042	0.00332138	0.00180569	0.00162271	0.00342224	0.00119723
-138	0.00065409	0.00077935	0.00114327	0.00115349	0.00350159	0.00166648	0.00362723	0.00325185	0.00812018	0.00292228	0.00136925	0.00131379	0.00262197	0.00101074	0.00307596	0.00412553	0.00206657	0.00296172	0.00688653	0.00243495	0.00564332	0.00433318	0.0126508	0.00378213	0.00231463	0.00196359	0.00437136	0.0014079	0.00186503	0.00245244	0.00160492	0.0020576	0.00519406	0.00205072	0.00463527	0.00379252	0.0103855	0.0033522	0.00184194	0.00163869	0.00349666	0.00120932
-137	0.000661558	0.000785649	0.00115264	0.00117216	0.00352724	0.00168217	0.0037029	0.00328177	0.00824567	0.00294558	0.00139629	0.00132288	0.0026735	0.0010188	0.00300244	0.00407942	0.00205217	0.00286951	0.00691395	0.00244908	0.00578799	0.00437635	0.0129651	0.00382179	0.00236978	0.0019818	0.00449282	0.0014225	0.001832	0.00243253	0.00160241	0.00202083	0.0052206	0.00206563	0.00474544	0.00382906	0.0106054	0.00338369	0.00188304	0.00165234	0.00358316	0.00122065
-136	0.000679216	0.000786998	0.00116252	0.00118814	0.00357445	0.00169734	0.00378836	0.00330403	0.00838454	0.00296299	0.00142545	0.00133103	0.00273119	0.00102466	0.00294894	0.0040307	0.00203849	0.00278165	0.00696798	0.00246636	0.00593652	0.00440694	0.013287	0.00385689	0.00242661	0.00198923	0.00462188	0.00143481	0.00181408	0.00240885	0.00160051	0.0019849	0.00527121	0.00208185	0.00486244	0.00385548	0.0108357	0.00340994	0.00192603	0.00166013	0.00367653	0.00122974
-135	0.000703611	0.000785594	0.00117193	0.00120303	0.00364306	0.00171058	0.00387449	0.00332084	0.00853326	0.00297525	0.00145576	0.00133773	0.00278852	0.00102969	0.00291403	0.00396481	0.00202756	0.00269121	0.00705825	0.00248384	0.00607487	0.004427	0.0135879	0.00388949	0.00248306	0.00198427	0.00473826	0.00144569	0.00180882	0.0023752	0.00159974	0.00194712	0.00535065	0.00209721	0.00497468	0.00387392	0.0110606	0.00343237	0.00196941	0.001661	0.00376339	0.00123769
-134	0.00072702	0.000785745	0.00118249	0.00121451	0.00373047	0.00172435	0.00395394	0.00333886	0.00868887	0.00298787	0.00148229	0.00134334	0.00283513	0.00103572	0.00288252	0.00387587	0.00202117	0.0026083	0.0071892	0.00250619	0.00620719	0.00444901	0.0138737	0.00392532	0.00253237	0.00197798	0.00483224	0.00145741	0.00180477	0.00233081	0.00160183	0.00191141	0.00545984	0.00211527	0.00508057	0.00389394	0.0112813	0.0034566	0.00200733	0.00166066	0.00383368	0.00124656
-133	0.000745139	0.000790995	0.00119348	0.0012205	0.00382934	0.0017414	0.00402927	0.0033564	0.00884893	0.00300112	0.00150062	0.00134923	0.00287555	0.00104235	0.00284096	0.00377751	0.00201474	0.00255064	0.00734076	0.00254049	0.00633555	0.00447062	0.0141523	0.00396343	0.00256716	0.00197151	0.00491139	0.00146948	0.00179305	0.00228425	0.00160411	0.00188557	0.00558505	0.00214095	0.00518241	0.00391351	0.0115006	0.00348228	0.00203389	0.00166037	0.00389347	0.00125592
-132	0.00076147	0.000803456	0.00120443	0.00122456	0.00392834	0.00176459	0.00410174	0.00337129	0.0090186	0.00301491	0.00151264	0.00135532	0.00291482	0.00104928	0.00279012	0.00368972	0.00200802	0.00251371	0.00748297	0.00259031	0.00646093	0.00448918	0.0144387	0.00400175	0.00259134	0.00196557	0.0049807	0.00148009	0.0017758	0.00224659	0.00160622	0.00186913	0.00570566	0.00217745	0.00528133	0.00393024	0.0117287	0.00350833	0.00205199	0.00166044	0.00394776	0.00126469
-131	0.000778717	0.000817416	0.00121653	0.00122823	0.00402537	0.00179486	0.0041715	0.0033846	0.0091926	0.00303008	0.00152093	0.00136274	0.002955	0.00105632	0.00273646	0.0035973	0.00200433	0.00248624	0.00759907	0.00265245	0.006581	0.00450499	0.014723	0.00404082	0.00260677	0.00196364	0.00504217	0.00148979	0.00175759	0.00220736	0.00161043	0.00185724	0.00581222	0.00222366	0.00537625	0.0039448	0.0119578	0.00353545	0.00206385	0.00166319	0.00399858	0.00127306
-130	0.000797069	0.000827878	0.00123136	0.00123159	0.00413145	0.00183056	0.00423448	0.00339979	0.00936507	0.00304909	0.00152722	0.00137209	0.0029937	0.00106476	0.00270207	0.00350629	0.00201006	0.00246819	0.00770417	0.00272405	0.00668821	0.00452294	0.0149879	0.00408561	0.00261365	0.0019664	0.00509216	0.00150243	0.00174957	0.00216708	0.00162071	0.00184989	0.00591781	0.0022773	0.00546135	0.00396137	0.0121765	0.00356735	0.00207044	0.00166924	0.00404293	0.0012836
-129	0.000815944	0.000831979	0.00124645	0.00123372	0.00424248	0.00186624	0.004285	0.0034168	0.0095273	0.00306992	0.00153164	0.00138183	0.00302727	0.00107429	0.00270022	0.00342157	0.00202272	0.00245398	0.00781618	0.00279602	0.00675966	0.00454471	0.0152009	0.00413297	0.00260682	0.00197047	0.00512305	0.00151743	0.00175808	0.00212677	0.00163458	0.00184385	0.00602933	0.00233113	0.00552233	0.00398075	0.0123641	0.00360144	0.00206923	0.00167615	0.00407516	0.00129586
-128	0.000829086	0.000834505	0.00125703	0.00123602	0.00434638	0.00189596	0.00431941	0.00343417	0.00965687	0.00308821	0.00153352	0.00139263	0.00305271	0.00108395	0.00273357	0.00333583	0.00203579	0.00243462	0.00793437	0.0028558	0.00680133	0.0045684	0.0153414	0.0041711	0.00258697	0.0019764	0.00513343	0.0015325	0.00178133	0.00208517	0.00164641	0.00183532	0.00614038	0.00237588	0.00556037	0.00400128	0.0124991	0.00362965	0.00206024	0.00168452	0.00409307	0.00130822
-127	0.000828974	0.00085215	0.00126334	0.00124632	0.0044439	0.00192288	0.00433924	0.0034535	0.00975766	0.00310573	0.0015319	0.00140502	0.00307043	0.00109402	0.00278222	0.00321984	0.0020469	0.00239907	0.00805229	0.00290577	0.0068214	0.00459722	0.0154208	0.00420363	0.00256083	0.00198513	0.00512288	0.00154727	0.0018056	0.00203599	0.00165512	0.00182269	0.0062481	0.00241433	0.00558032	0.00402536	0.0125892	0.00365468	0.00204637	0.00169508	0.00409665	0.00132065
-126	0.000824434	0.000882093	0.00126729	0.00126477	0.00453221	0.00195259	0.00434431	0.00347757	0.00983604	0.00312535	0.00152766	0.00141751	0.0030805	0.00110502	0.00283037	0.00308044	0.00205641	0.0023501	0.0081602	0.00295392	0.00681954	0.0046355	0.0154538	0.00423579	0.00253152	0.00199967	0.00509786	0.00156106	0.0018274	0.00198127	0.00166185	0.00180743	0.00634621	0.00245325	0.00558192	0.00405653	0.0126449	0.00368057	0.00202959	0.00170859	0.00408918	0.00133304
-125	0.000821509	0.000912166	0.00126974	0.00128526	0.00460128	0.00198219	0.00433717	0.00350097	0.00989002	0.0031427	0.00152135	0.00142845	0.00308846	0.00111516	0.00288404	0.00293823	0.0020646	0.00229853	0.00823223	0.00299805	0.00680135	0.00467254	0.0154588	0.00425865	0.00249972	0.00201718	0.00507299	0.00157152	0.00185278	0.0019252	0.00166717	0.0017919	0.00641675	0.00249012	0.00556926	0.00408676	0.0126744	0.00370067	0.00201054	0.00172281	0.00408072	0.00134334
-124	0.000818749	0.00093437	0.00127116	0.00130363	0.0046552	0.00200807	0.00432574	0.00351632	0.00993129	0.00315345	0.00151756	0.00143703	0.00310053	0.00112346	0.002963	0.00281503	0.00207329	0.00225196	0.00828326	0.00303721	0.0067694	0.00469627	0.0154464	0.00427173	0.00247047	0.00203193	0.00505557	0.00157927	0.00189087	0.0018747	0.00167223	0.0017778	0.00646923	0.00252264	0.00554757	0.00410629	0.0126888	0.00371259	0.00199401	0.00173448	0.00407805	0.00135137
-123	0.00081703	0.000947994	0.001273	0.00131899	0.00469535	0.00203055	0.00431315	0.00352741	0.00996762	0.00315969	0.00152027	0.00144385	0.00311553	0.00113154	0.00307182	0.00271931	0.00208379	0.00221209	0.00832675	0.00307059	0.00673477	0.00471254	0.0154305	0.00427871	0.00245181	0.00204506	0.00504782	0.00158648	0.00194443	0.00183365	0.00167839	0.00176554	0.00651105	0.00255057	0.00552396	0.00411998	0.0126991	0.0037192	0.00198604	0.00174446	0.00408167	0.00135901
-122	0.000813357	0.00095327	0.00127608	0.00133298	0.00472403	0.00204675	0.00429879	0.00353827	0.00999158	0.00316288	0.00152978	0.00144957	0.00313221	0.00113932	0.0031871	0.00262097	0.00209611	0.00217196	0.00836656	0.0030893	0.00670817	0.0047275	0.0154116	0.00427791	0.0024475	0.00205644	0.00505039	0.00159326	0.00200023	0.00178712	0.00168609	0.00175247	0.0065453	0.00256802	0.00550348	0.00413289	0.0127016	0.0037204	0.00198864	0.00175301	0.0040913	0.00136629
-121	0.000806238	0.000955602	0.00127851	0.00134647	0.00474133	0.00205375	0.00428179	0.00354642	0.0100036	0.00316368	0.00154699	0.00145392	0.00314523	0.00114622	0.00329879	0.00252996	0.00210809	0.00213049	0.00841142	0.00309175	0.00668826	0.00473974	0.0153832	0.00427097	0.00245894	0.0020656	0.00505195	0.00159853	0.00205251	0.00174278	0.0016933	0.00173848	0.00657637	0.00257275	0.00548502	0.00414308	0.0126934	0.00371732	0.00200296	0.00175976	0.00409859	0.00137237
-120	0.000793009	0.000959589	0.00127742	0.00135877	0.00474358	0.00205319	0.00426402	0.00355104	0.00999429	0.00316134	0.00156709	0.00145646	0.00315367	0.00115157	0.00339296	0.00246123	0.00211292	0.00209542	0.00845082	0.00308194	0.00667056	0.00474475	0.0153247	0.00425756	0.00247888	0.00207014	0.00504647	0.00160038	0.00209298	0.00171041	0.00169517	0.00172709	0.0065972	0.00256757	0.00546729	0.00414789	0.0126595	0.00370945	0.00202298	0.0017633	0.00410007	0.00137597
-119	0.000773876	0.000965315	0.00127554	0.00136943	0.00474557	0.00205029	0.00425266	0.00355553	0.00997511	0.00315804	0.00158921	0.00145777	0.00316717	0.00115534	0.00346041	0.00243443	0.00211688	0.00207765	0.00850259	0.00307151	0.00667736	0.00474692	0.0152787	0.00424156	0.00251072	0.00207143	0.00505363	0.00159966	0.00211714	0.00169987	0.00169621	0.00172354	0.00662408	0.0025609	0.00546501	0.00415123	0.0126269	0.0036998	0.00204997	0.0017646	0.0041104	0.0013775
-118	0.000759249	0.000970256	0.00127548	0.0013791	0.00475938	0.00204909	0.0042558	0.00356045	0.0099856	0.00315689	0.00161506	0.00145792	0.00319133	0.00115862	0.00349687	0.00245178	0.00212405	0.00208107	0.00857596	0.00307206	0.00670501	0.00474893	0.0152827	0.00423071	0.00255512	0.00207133	0.00508121	0.0015988	0.00212806	0.00171102	0.00169976	0.00173008	0.00666767	0.00256057	0.0054804	0.00415469	0.0126341	0.0036938	0.00208509	0.00176462	0.00413627	0.00137871
-117	0.000759259	0.000965492	0.00127579	0.00138401	0.00477213	0.00204508	0.00427568	0.00356441	0.0100248	0.00315603	0.00164389	0.00145684	0.00322436	0.0011617	0.00351351	0.00252046	0.00213025	0.00210539	0.00863921	0.00307872	0.00675473	0.00474423	0.0153244	0.00421781	0.0026066	0.00206801	0.00512726	0.00159725	0.00213639	0.00174298	0.00170302	0.0017447	0.00670567	0.0025619	0.00551521	0.00415432	0.0126746	0.00368692	0.00212524	0.00176242	0.00417581	0.00137947
-116	0.000757701	0.000953989	0.00127917	0.00138217	0.00478193	0.00203553	0.00430983	0.0035672	0.0100893	0.00315493	0.00167417	0.00145602	0.00326785	0.00116395	0.00351152	0.00262266	0.00213951	0.0021398	0.00869295	0.00308341	0.00684007	0.00473377	0.0154211	0.00420066	0.00266505	0.00206433	0.00519822	0.00159562	0.00213461	0.00178833	0.00170934	0.00176098	0.00673744	0.00255947	0.00557495	0.00415049	0.0127552	0.00367779	0.00216961	0.00176018	0.00423303	0.00137978
-115	0.000748082	0.000943529	0.00128551	0.00137838	0.00479128	0.00202745	0.00435506	0.00357306	0.010178	0.0031585	0.00170676	0.00145791	0.00331758	0.00116745	0.00348885	0.00273377	0.00215116	0.00217752	0.00873986	0.00309035	0.0069521	0.00472844	0.0155643	0.00418973	0.00273064	0.00206581	0.00528592	0.00159828	0.00211847	0.00183865	0.00171833	0.00177795	0.00676557	0.0025589	0.00565358	0.00415075	0.0128711	0.00367412	0.0022187	0.00176186	0.00430175	0.00138286
-114	0.000740023	0.000939756	0.00129343	0.00137557	0.00479615	0.00202474	0.0044076	0.00358479	0.0102724	0.00316939	0.00174057	0.00146108	0.00337248	0.00117318	0.00342116	0.00285867	0.00215868	0.00221998	0.00874983	0.00310288	0.00708248	0.00473124	0.0157244	0.0041827	0.00280177	0.00206979	0.00538385	0.00160491	0.00208059	0.00189921	0.00172606	0.00179778	0.00677299	0.00256381	0.00574504	0.00415802	0.0129984	0.00367604	0.00227117	0.00176544	0.00437817	0.00138905
-113	0.000733232	0.000940079	0.00130161	0.00137234	0.00480373	0.00202437	0.0044613	0.00359783	0.0103624	0.00318506	0.00177361	0.00146272	0.00343221	0.00117939	0.00330544	0.00299107	0.00216144	0.00226237	0.0087423	0.00311824	0.00721595	0.0047352	0.015874	0.00417849	0.00287312	0.00207213	0.00548635	0.00161292	0.00201934	0.00196557	0.00173153	0.00181736	0.00677301	0.00257131	0.00583862	0.00416651	0.0131182	0.00368178	0.00232337	0.00176743	0.00445928	0.00139615
-112	0.00073226	0.000942878	0.00130906	0.00136824	0.0048232	0.00202803	0.00451248	0.00361201	0.0104498	0.00320436	0.00180356	0.00146448	0.00349134	0.00118606	0.00319565	0.00313204	0.00216348	0.00230428	0.0087571	0.00314334	0.00734458	0.00474255	0.016013	0.00418583	0.00293989	0.00207594	0.00559139	0.00162377	0.00196396	0.00203746	0.00173627	0.00183626	0.00679015	0.00258568	0.00592853	0.00417728	0.0132314	0.0036951	0.00237173	0.00177021	0.00454137	0.00140492
-111	0.000733349	0.000946832	0.00131631	0.0013638	0.00485806	0.00203683	0.00456353	0.00363148	0.0105351	0.00322624	0.00182674	0.00146805	0.00355117	0.00119418	0.00309743	0.00326532	0.00216541	0.00234567	0.00878295	0.00317953	0.00747517	0.00476049	0.0161518	0.00420593	0.00299667	0.00208314	0.0057054	0.00163934	0.00191539	0.00210607	0.00174086	0.00185473	0.0068205	0.00260818	0.00601935	0.00419598	0.0133434	0.00371609	0.0024117	0.0017756	0.00462828	0.00141676
-110	0.000740407	0.00095211	0.00132378	0.00135983	0.00489351	0.00205023	0.00461471	0.00365323	0.0106264	0.00324786	0.0018469	0.00147257	0.00361578	0.00120354	0.00300292	0.0033623	0.00216715	0.00237619	0.00879869	0.00322133	0.00761032	0.00478468	0.0163051	0.00422988	0.00304769	0.00209278	0.005835	0.00165802	0.00187167	0.00215721	0.00174547	0.00186801	0.0068461	0.00263578	0.00611251	0.00421896	0.0134657	0.00373887	0.00244729	0.00178268	0.00472539	0.00143078
-109	0.000758631	0.000960533	0.00133023	0.00135776	0.00492289	0.00206757	0.0046632	0.00367424	0.0107274	0.0032691	0.00186295	0.00147816	0.00367988	0.00121466	0.0029371	0.00339404	0.00216653	0.00238687	0.0087951	0.00326043	0.00773716	0.00480803	0.0164528	0.00425374	0.00309013	0.00210426	0.00596852	0.00167856	0.00184787	0.00217729	0.00174838	0.00187232	0.00685899	0.002664	0.00620018	0.00424113	0.0135901	0.00376142	0.00247654	0.00179121	0.0048242	0.00144661
-108	0.000775264	0.000972324	0.00133562	0.00135523	0.00494452	0.00208882	0.00470471	0.00369556	0.0108147	0.00329104	0.00187411	0.00148612	0.00373805	0.00122759	0.00290074	0.00337588	0.00216423	0.00237764	0.00876597	0.00329195	0.00784708	0.00483081	0.0165639	0.00428107	0.00312089	0.00211835	0.00609297	0.00170085	0.001838	0.0021741	0.00174993	0.00186644	0.00685525	0.00269039	0.0062759	0.00426319	0.0136893	0.00378606	0.0024975	0.00180224	0.00491551	0.00146422
-107	0.000786826	0.00098861	0.00134109	0.00135237	0.00495711	0.00211654	0.00473605	0.00371716	0.0108826	0.00331472	0.00188518	0.0014964	0.00379226	0.00124241	0.00287777	0.00331385	0.00216326	0.00234931	0.00872838	0.0033154	0.00792388	0.00485722	0.0166433	0.00431907	0.00314584	0.00213593	0.00620926	0.00172632	0.0018323	0.00215123	0.00175217	0.00185084	0.00684275	0.00271597	0.00632996	0.00428719	0.013763	0.0038169	0.00251551	0.00181617	0.00500076	0.00148436
-106	0.000804293	0.00100667	0.00134245	0.00135208	0.00496785	0.00215007	0.00475929	0.00374104	0.0109244	0.00334135	0.00189719	0.00150681	0.00383832	0.00125839	0.00287766	0.00322133	0.00216062	0.00231376	0.00869534	0.00333783	0.00796263	0.00488946	0.0166679	0.00437004	0.0031685	0.00215227	0.00630946	0.00175383	0.00184098	0.002114	0.00175154	0.00183292	0.00683159	0.00274395	0.00636096	0.00431525	0.0137962	0.00385569	0.00253285	0.00182954	0.00507389	0.00150611
-105	0.000830575	0.00102733	0.00133973	0.001353	0.0049905	0.00218397	0.00478095	0.00376546	0.0109464	0.00337009	0.00190646	0.00151605	0.00388015	0.00127323	0.00289792	0.0031293	0.00216004	0.00227711	0.00869276	0.00336255	0.00798586	0.00492189	0.0166486	0.00442884	0.00318619	0.0021638	0.0064006	0.00177897	0.00186425	0.00207832	0.00174988	0.00181506	0.00684163	0.00277326	0.00638341	0.00434368	0.0137975	0.00389947	0.00254632	0.00183993	0.00514037	0.0015261
-104	0.000860839	0.00104421	0.00133521	0.0013528	0.00502678	0.00221525	0.00480186	0.00378821	0.0109733	0.00339596	0.00191308	0.00152692	0.00392218	0.00128623	0.0029431	0.00302627	0.00216381	0.00223523	0.00873829	0.00338636	0.00800592	0.00495098	0.0166311	0.0044928	0.00320108	0.00217278	0.0064939	0.00180099	0.00190197	0.00203524	0.00174951	0.00179401	0.00688254	0.0028008	0.00640389	0.0043696	0.0138022	0.00394438	0.00255708	0.00184985	0.00520804	0.00154361
-103	0.000892569	0.00105668	0.00132995	0.00135253	0.00506424	0.00224641	0.0048232	0.00381278	0.0110077	0.00341716	0.0019191	0.00154139	0.00396094	0.00129836	0.0030165	0.00291884	0.0021703	0.00219327	0.00880237	0.0034125	0.00803163	0.00498476	0.0166356	0.00456197	0.00322033	0.0021835	0.00658909	0.00182269	0.00195453	0.00198776	0.00175013	0.0017729	0.00693331	0.00282945	0.00642742	0.00439877	0.0138217	0.00398956	0.00256972	0.00186244	0.00527501	0.00156052
-102	0.000921882	0.00106634	0.00132409	0.00135327	0.0050989	0.00227659	0.00485088	0.00383868	0.0110498	0.00343652	0.00192411	0.00155705	0.00399996	0.00131072	0.00308893	0.0028103	0.00217828	0.00215411	0.00885856	0.0034357	0.00806277	0.00502569	0.0166522	0.00463004	0.00324408	0.00219753	0.00667861	0.00184452	0.00200541	0.00193832	0.00175118	0.00175369	0.00697873	0.00285615	0.00645683	0.00443219	0.013851	0.00403328	0.00258409	0.00187729	0.00533929	0.00157762
-101	0.000954694	0.00107262	0.00131844	0.00135459	0.00513286	0.00230761	0.00488151	0.00386408	0.0111084	0.00345558	0.00192966	0.00157106	0.00404119	0.00132311	0.00316996	0.00270403	0.00218962	0.00211826	0.00891241	0.00345711	0.0080943	0.00506642	0.0166864	0.0046868	0.0032798	0.00221296	0.00677483	0.00186451	0.00206233	0.00188832	0.00175403	0.00173642	0.00702263	0.00288236	0.00648791	0.00446525	0.0138974	0.00407119	0.00260473	0.00189201	0.00540801	0.00159381
-100	0.000991337	0.00107912	0.00131376	0.00135569	0.00517904	0.002337	0.00491534	0.00389261	0.0111877	0.00347786	0.00193594	0.001585	0.00408129	0.00133547	0.00327828	0.00261984	0.00220456	0.00208926	0.00898567	0.00348214	0.0081442	0.00511084	0.0167633	0.004742	0.00332918	0.00223064	0.00688332	0.00188362	0.00213481	0.00184948	0.00175916	0.00172247	0.00708235	0.00290957	0.00652977	0.00450173	0.0139755	0.00410993	0.00263256	0.00190782	0.00548231	0.00160954
-99	0.00100792	0.00108423	0.00130593	0.00135562	0.0052325	0.00236304	0.0049548	0.00392385	0.0112735	0.00350381	0.00194563	0.00159932	0.00412085	0.00134728	0.00343961	0.00256923	0.00222711	0.0020698	0.00908345	0.00351083	0.00821566	0.00516151	0.0168797	0.00480147	0.00338756	0.00224952	0.00699276	0.0019024	0.00222376	0.00182673	0.00176652	0.00171271	0.00715798	0.00293693	0.00658523	0.00454268	0.0140766	0.00415264	0.0026666	0.00192442	0.0055568	0.00162484
-98	0.00100127	0.00108402	0.00129518	0.00135656	0.00529704	0.00238987	0.00499729	0.00395784	0.0113641	0.0035333	0.00195997	0.0016137	0.00416171	0.00135905	0.00363699	0.00253841	0.00225788	0.00205953	0.00921433	0.00354693	0.00829725	0.00522234	0.0170276	0.00486354	0.00345535	0.00227018	0.00710612	0.00192245	0.00231913	0.00181121	0.00177653	0.00170805	0.00725569	0.0029684	0.00664727	0.00459009	0.0141958	0.00419842	0.00270766	0.00194194	0.00563392	0.00164075
-97	0.000986032	0.00107939	0.00128464	0.00135888	0.00537809	0.00241805	0.00504439	0.00399619	0.0114638	0.00356712	0.00197438	0.00162896	0.00420284	0.00137128	0.00383583	0.00252546	0.00229337	0.00205902	0.00937739	0.00360101	0.00839905	0.00529259	0.0172019	0.00492639	0.00352632	0.00229322	0.00722198	0.00194359	0.00241093	0.00180242	0.001789	0.00170895	0.00737774	0.00300953	0.00672172	0.00464439	0.0143329	0.00424676	0.00275035	0.00196109	0.00571241	0.00165743
-96	0.000963669	0.00107275	0.00127761	0.00135943	0.00546726	0.00244433	0.00509223	0.00403151	0.0115726	0.00359951	0.0019865	0.00164521	0.00424506	0.0013844	0.00402515	0.00252295	0.00233037	0.00206037	0.009563	0.00366317	0.00851582	0.00535678	0.0173996	0.00498272	0.00359089	0.00231806	0.00733542	0.00196507	0.00249441	0.00179785	0.00180399	0.0017099	0.00751513	0.00305375	0.00680402	0.00469415	0.0144861	0.00429112	0.0027887	0.00198164	0.00579024	0.00167473
-95	0.000934576	0.00106123	0.00127326	0.00135838	0.00554929	0.00246964	0.00513382	0.00406571	0.0116861	0.0036267	0.00199886	0.00166313	0.00428938	0.00139994	0.00418953	0.00251299	0.00235632	0.00205931	0.00973922	0.00372478	0.00863306	0.00542009	0.0176195	0.00503082	0.00365497	0.00234779	0.00745043	0.00198934	0.00256205	0.00178711	0.00181479	0.00170885	0.00764426	0.00309721	0.00688344	0.0047429	0.0146528	0.00432876	0.00282691	0.00200546	0.00586991	0.00169464
-94	0.000898042	0.00104674	0.00126797	0.00135785	0.00562024	0.00249394	0.00517248	0.00410305	0.0117973	0.00365465	0.00201132	0.0016814	0.00433133	0.00141702	0.0043372	0.0025028	0.00237494	0.00206	0.00989241	0.00378363	0.00875199	0.00548937	0.0178559	0.00507052	0.0037188	0.00238284	0.00756156	0.00201516	0.00261762	0.00177477	0.00182146	0.00170892	0.00775632	0.00313879	0.00696224	0.00479621	0.0148266	0.00436258	0.00286506	0.00203212	0.00594644	0.00171609
-93	0.000858951	0.00103074	0.00126156	0.00135678	0.00569427	0.00251323	0.00521113	0.00413933	0.0119097	0.00368558	0.00202257	0.00169797	0.00437529	0.00143361	0.00447302	0.00248791	0.00239324	0.00205956	0.010038	0.00382966	0.00885771	0.00555209	0.0180903	0.00509355	0.00377122	0.00241784	0.00766505	0.00203749	0.00266598	0.00175932	0.0018274	0.00170817	0.00786612	0.00317144	0.00703442	0.00484571	0.015	0.00438956	0.0028969	0.0020579	0.00602017	0.00173555
-92	0.000816818	0.00101631	0.00125475	0.00135512	0.00576669	0.00252837	0.00524927	0.00417377	0.0120226	0.00371532	0.00203683	0.00171326	0.00442464	0.00144829	0.00459952	0.00247217	0.00241027	0.00205809	0.0101853	0.00386835	0.00893549	0.00560344	0.0183107	0.00510862	0.00380613	0.00244799	0.00776293	0.00205744	0.00270817	0.00174424	0.00183251	0.00170661	0.00797597	0.00319836	0.00709238	0.00488861	0.0151667	0.00441197	0.00292148	0.00208063	0.00609378	0.00175286
-91	0.000764785	0.00100695	0.00124545	0.00135313	0.00583407	0.00253841	0.00528896	0.00420599	0.0121189	0.00374155	0.00205582	0.00172945	0.00447633	0.00146081	0.00469281	0.00246265	0.00242025	0.0020547	0.0103419	0.00389846	0.00898003	0.00564937	0.0184951	0.0051326	0.00381586	0.00247307	0.00782922	0.00207687	0.0027288	0.0017348	0.00183285	0.00170391	0.008088	0.00321844	0.00713449	0.00492768	0.015307	0.00443708	0.00293584	0.00210126	0.00615277	0.00176884
-90	0.000698503	0.000995425	0.00123399	0.00135037	0.00589469	0.00254919	0.00532843	0.0042343	0.0121999	0.00376333	0.00207652	0.00174611	0.00452991	0.00147287	0.00473339	0.00244734	0.00242435	0.00204805	0.0104891	0.00391689	0.00897126	0.00569112	0.0186252	0.00515904	0.00379994	0.00249538	0.00785865	0.00209661	0.00271595	0.00172138	0.00182917	0.00169921	0.00819188	0.00323304	0.00714985	0.00496271	0.0154125	0.00446119	0.00293823	0.00212074	0.00619428	0.00178474
-89	0.000652565	0.000979494	0.00122851	0.00134726	0.00595238	0.00256147	0.00536277	0.00426109	0.012276	0.00378304	0.00209535	0.00176449	0.00458205	0.00148558	0.00461824	0.00242358	0.0024126	0.0020382	0.0106111	0.00392622	0.0089183	0.00572971	0.0187153	0.00518644	0.0037678	0.00252052	0.00787231	0.00211844	0.0026354	0.00170154	0.00182055	0.00169273	0.00828175	0.00324385	0.00714054	0.0049954	0.0154956	0.00448474	0.00293157	0.0021425	0.00622718	0.00180201
-88	0.00064086	0.000964345	0.00122702	0.00134276	0.0060009	0.00256692	0.00539457	0.00428571	0.0123453	0.00379875	0.00211262	0.00178379	0.00462984	0.00149731	0.00437885	0.00239349	0.00238131	0.00202245	0.0107141	0.00392343	0.00885778	0.00575489	0.0187882	0.00521023	0.00372828	0.00254496	0.00787339	0.00213894	0.00250985	0.00167892	0.00180416	0.0016826	0.00835752	0.00324517	0.00712618	0.0050203	0.0155667	0.00450449	0.00292045	0.00216438	0.00625162	0.00181813
-87	0.000634242	0.000949275	0.00122346	0.00133588	0.00604043	0.00256652	0.00542182	0.00430571	0.0124067	0.0038079	0.00213131	0.0018013	0.00467366	0.00150642	0.00411993	0.00235198	0.00233898	0.00199856	0.0107998	0.00389727	0.0088019	0.00576291	0.0188785	0.00522419	0.00369105	0.0025648	0.00786743	0.00215603	0.00237709	0.00165063	0.00178122	0.00166722	0.00842011	0.00323189	0.00711186	0.00503431	0.0156426	0.00451604	0.00291118	0.00218305	0.00627054	0.00183122
-86	0.000626508	0.000933858	0.0012164	0.00133034	0.00607708	0.00256832	0.00545146	0.00433034	0.012469	0.00381878	0.00215305	0.00181819	0.00471802	0.00151486	0.00384044	0.00230583	0.00228782	0.00197467	0.0108621	0.00386119	0.00875913	0.00577435	0.0190056	0.00523666	0.00366466	0.00258371	0.0078698	0.00217301	0.00223348	0.00161985	0.00175211	0.00165251	0.00846962	0.00321476	0.00710529	0.00505234	0.0157373	0.00452772	0.00290885	0.00220095	0.00629391	0.00184394
-85	0.000617282	0.00092282	0.00120721	0.00132678	0.00611653	0.00257229	0.00549179	0.00435924	0.0125373	0.00383602	0.00217752	0.00183474	0.00476021	0.00152233	0.00357182	0.00226405	0.00224302	0.00195388	0.010921	0.00382478	0.00872383	0.00578914	0.0191321	0.00525497	0.00363923	0.0025997	0.00786728	0.00218907	0.00209455	0.00159344	0.00172511	0.00164033	0.00851874	0.00319854	0.00710781	0.00507419	0.0158347	0.0045455	0.00290838	0.00221722	0.00631374	0.0018557
-84	0.000608707	0.000918646	0.00119946	0.00132317	0.00616455	0.00258083	0.00553916	0.00439107	0.012608	0.00385744	0.00220623	0.00185284	0.0047994	0.00153078	0.00331627	0.00222925	0.00220438	0.00193336	0.0109874	0.00379371	0.00868775	0.00580761	0.0192332	0.00528541	0.00361536	0.00261462	0.00786094	0.00220786	0.00196249	0.00157395	0.00170192	0.00162826	0.00857596	0.00318727	0.00711345	0.00509934	0.0159206	0.00457142	0.0029108	0.00223373	0.00633017	0.00186932
-83	0.000604024	0.000918617	0.00119416	0.00132062	0.0062103	0.00260071	0.00559669	0.00443097	0.0126807	0.00388492	0.00223982	0.00187596	0.00483607	0.00154295	0.00307429	0.00220466	0.00216827	0.00191544	0.0110595	0.0037838	0.00867161	0.0058419	0.0193315	0.00533735	0.00360458	0.00263495	0.00786338	0.00223405	0.00183916	0.00156164	0.00168122	0.00161803	0.00863488	0.00319226	0.00713415	0.00513644	0.0160061	0.00461114	0.0029222	0.00225545	0.00634973	0.0018885
-82	0.000604062	0.000917603	0.00118963	0.00131829	0.00624985	0.00262895	0.00565999	0.00447537	0.0127518	0.00392027	0.00227288	0.00190242	0.00486977	0.0015588	0.00284177	0.00218256	0.00213599	0.00189633	0.0111156	0.00378708	0.00868634	0.00588401	0.0194306	0.0053948	0.00360968	0.00265836	0.0078754	0.00226021	0.00172291	0.00155008	0.00166281	0.00160731	0.00868271	0.00320802	0.00717316	0.00517969	0.0160912	0.00465754	0.00294128	0.00228039	0.00637259	0.0019095
-81	0.0006103	0.000912959	0.00118696	0.00131621	0.00629423	0.00266295	0.00572626	0.00452335	0.0128379	0.00396409	0.00230392	0.00192981	0.00490444	0.00157868	0.00263149	0.00215394	0.00211087	0.00187625	0.0111656	0.00380077	0.00872831	0.00592815	0.0195426	0.00544711	0.00363241	0.00268324	0.0079086	0.00228551	0.0016209	0.00153345	0.00164892	0.00159623	0.00872991	0.00323186	0.00722729	0.00522575	0.0161902	0.0047056	0.00296817	0.00230653	0.00640652	0.00193209
-80	0.000630808	0.000911376	0.00118768	0.00131477	0.00635683	0.00269908	0.00579653	0.00457578	0.0129339	0.0040149	0.00233513	0.00195873	0.00493928	0.00159933	0.00246347	0.00213186	0.0020945	0.00186168	0.0112556	0.00383542	0.00880304	0.00597715	0.0196813	0.00550564	0.00367183	0.00271	0.00795941	0.00231133	0.00154714	0.00152162	0.00164109	0.00158822	0.00880624	0.00326725	0.00729978	0.00527646	0.0163076	0.00476027	0.00300348	0.00233437	0.00644935	0.00195533
-79	0.000652909	0.000913329	0.00118654	0.00131293	0.00642054	0.00273634	0.00586984	0.00462935	0.0130275	0.00406594	0.0023693	0.00198635	0.00497866	0.00161872	0.00239474	0.0021177	0.00208803	0.00185383	0.0113713	0.00389538	0.00890094	0.00602846	0.0198268	0.00556761	0.00372508	0.00273272	0.00802238	0.00233532	0.00152382	0.00151551	0.00163728	0.00158338	0.0088959	0.00331586	0.00738539	0.00532891	0.0164271	0.00481677	0.00304719	0.00235953	0.00650052	0.00197702
-78	0.000668025	0.000912282	0.00118372	0.0013088	0.00648191	0.00278019	0.00594297	0.00468226	0.0131216	0.00411784	0.00240369	0.00201187	0.00503022	0.00163903	0.00240758	0.00212056	0.00209182	0.00185632	0.01149	0.00398212	0.00900077	0.00608432	0.0199612	0.00563005	0.00378096	0.00275201	0.00810059	0.00235921	0.0015378	0.00151642	0.00163777	0.00158256	0.00898593	0.00338116	0.00747187	0.00538329	0.0165414	0.00487395	0.00309232	0.00238194	0.0065654	0.00199912
-77	0.000684379	0.000908776	0.00118493	0.00130463	0.00655411	0.00283118	0.00602268	0.00473821	0.013231	0.00417533	0.00243545	0.00203879	0.00509526	0.00166236	0.00243781	0.00215283	0.00210937	0.00187393	0.0116268	0.00409726	0.00908904	0.0061513	0.0200561	0.00570056	0.00382851	0.00277359	0.00819163	0.0023861	0.00156109	0.0015308	0.00164715	0.00158928	0.00909048	0.00346422	0.00755586	0.00544475	0.0166436	0.00493794	0.00313198	0.00240619	0.00664344	0.00202423
-76	0.000702892	0.000905345	0.00118991	0.00129965	0.00662946	0.00288105	0.00610622	0.00479492	0.0133654	0.00423357	0.0024667	0.00206689	0.00516812	0.00168522	0.00248913	0.00220165	0.00214088	0.00189784	0.0117705	0.0042202	0.00915972	0.00622313	0.020118	0.00577828	0.0038669	0.00279667	0.00827701	0.00241249	0.00159601	0.0015535	0.0016654	0.00159874	0.00919997	0.00355062	0.00763297	0.00550903	0.0167417	0.00500593	0.0031668	0.00243178	0.00672257	0.00204886
-75	0.000725721	0.000899737	0.00119477	0.00129242	0.00670403	0.00292972	0.00618933	0.00485008	0.0135138	0.00428939	0.00250101	0.00209587	0.00524484	0.00170771	0.00254795	0.00225761	0.00217203	0.00192218	0.0119054	0.00434374	0.00922691	0.00629424	0.0201989	0.00585712	0.00390867	0.0028219	0.00835755	0.00243859	0.00163684	0.00157867	0.0016834	0.0016073	0.00930471	0.00363673	0.00770812	0.00557216	0.0168563	0.00507325	0.00320484	0.00245889	0.0068012	0.00207315
-74	0.000750299	0.000891031	0.00119696	0.00128594	0.00676936	0.00297758	0.00626866	0.00489986	0.0136617	0.0043417	0.00253438	0.0021247	0.00532648	0.00173038	0.00260548	0.00231376	0.00219806	0.00194861	0.0120266	0.00446711	0.00928435	0.00635775	0.02029	0.00593327	0.00394458	0.00284797	0.00843082	0.00246402	0.00167789	0.0016024	0.00169751	0.00161728	0.00939798	0.00372234	0.0077765	0.0056288	0.0169758	0.00513749	0.00323948	0.00248633	0.00687865	0.0020972
-73	0.000768678	0.000884724	0.00119542	0.00128052	0.00683459	0.00302033	0.00633505	0.00494141	0.0138087	0.00438642	0.00256473	0.00215011	0.00541502	0.00175234	0.00265471	0.0023691	0.00221934	0.00197619	0.0121348	0.00458108	0.00931898	0.00640923	0.0203772	0.00600696	0.00396714	0.00287069	0.00849199	0.00249033	0.00171169	0.00162691	0.00170738	0.00162835	0.0094847	0.00380071	0.00782702	0.00567532	0.0170929	0.00519669	0.00326593	0.0025104	0.0069535	0.00212133
-72	0.000784348	0.000884524	0.0011927	0.00127567	0.00691992	0.00306179	0.00639611	0.00498261	0.0139652	0.00442473	0.002597	0.00217514	0.00550779	0.00177435	0.00270131	0.00242699	0.00223449	0.00200603	0.0122591	0.0046949	0.00934105	0.00646328	0.0204832	0.00609156	0.00398509	0.00289586	0.00855099	0.00252531	0.00174283	0.00165576	0.00171359	0.00164085	0.00958952	0.00387834	0.00786858	0.00572294	0.0172242	0.00525815	0.00329105	0.0025355	0.00702939	0.00214983
-71	0.000800693	0.000888873	0.00118945	0.00127148	0.00700341	0.00310558	0.00645665	0.005028	0.0141194	0.00446049	0.00263128	0.00220193	0.0056026	0.00179641	0.00274262	0.00249217	0.00224091	0.00204044	0.0123733	0.00481348	0.00936258	0.0065245	0.0206059	0.00618474	0.00400048	0.0029259	0.00861491	0.00256689	0.00177166	0.00169052	0.00171518	0.00165596	0.00968834	0.00395953	0.00790961	0.00577625	0.0173626	0.00532261	0.00331588	0.00256392	0.00710875	0.00218165
-70	0.000805749	0.000893332	0.00118215	0.00126834	0.00705233	0.00315088	0.00651293	0.00507468	0.0142654	0.00449577	0.0026654	0.00222714	0.00570151	0.00182075	0.00275617	0.00255808	0.00223352	0.00207221	0.0124128	0.00491482	0.00937784	0.00658312	0.0207073	0.00626975	0.00401218	0.00295524	0.00868874	0.00261166	0.00178096	0.00172571	0.00170783	0.00167028	0.00973258	0.00403285	0.00794538	0.0058289	0.0174863	0.00538276	0.00333879	0.00259119	0.00719512	0.00221621
-69	0.000797189	0.00089925	0.00117132	0.00126646	0.00708687	0.00319822	0.0065673	0.00512146	0.0144102	0.00453373	0.00269781	0.00225265	0.00580247	0.00184781	0.0027451	0.00262422	0.00221917	0.00209683	0.0123985	0.00498655	0.00938889	0.00663806	0.0207949	0.00634437	0.00401929	0.0029858	0.0087677	0.00265785	0.00177115	0.00176173	0.00169525	0.00168165	0.00974269	0.00409239	0.0079781	0.00587976	0.0176025	0.00543905	0.00335855	0.00261923	0.00728508	0.00225283
-68	0.00077769	0.000912476	0.00115925	0.0012697	0.00712693	0.0032413	0.0066262	0.00517004	0.01456	0.00457226	0.00273243	0.00228008	0.00589979	0.00187479	0.00272033	0.00266729	0.0022027	0.0021098	0.0123665	0.00502064	0.00940476	0.00669303	0.0208951	0.00641333	0.00403131	0.00301957	0.00885105	0.00270269	0.00174901	0.00178988	0.00168098	0.00168975	0.00974671	0.00413097	0.00801548	0.00593154	0.0177275	0.00549279	0.00338187	0.00264983	0.00737542	0.00228874
-67	0.000756261	0.000927804	0.00114035	0.00127477	0.0071587	0.00327276	0.00668562	0.00521396	0.0146986	0.0046047	0.00276964	0.00230606	0.00599499	0.00189953	0.00269507	0.00268422	0.00217614	0.00210974	0.0123004	0.00502156	0.00943102	0.00673874	0.0210075	0.00646975	0.00405164	0.00305258	0.00894122	0.00274322	0.00172567	0.00180601	0.00165824	0.00169226	0.00972953	0.00414716	0.00805832	0.00597635	0.017853	0.00553722	0.00341064	0.00267932	0.0074681	0.00232137
-66	0.000739882	0.000937729	0.00111591	0.0012774	0.0071764	0.00329924	0.00674451	0.00525047	0.0148057	0.00463159	0.00280803	0.0023304	0.00608824	0.00192552	0.00266906	0.00269536	0.00214021	0.00210548	0.0122111	0.00501708	0.00947168	0.00677209	0.021115	0.00651221	0.00407704	0.0030842	0.00904356	0.00278342	0.00170447	0.00181655	0.00162806	0.00169144	0.00969373	0.00415816	0.0081081	0.00601128	0.0179603	0.0055719	0.00344253	0.0027073	0.0075659	0.00235447
-65	0.000724275	0.000944392	0.00109321	0.00127837	0.00718708	0.00332276	0.00679764	0.00528548	0.0148863	0.00465632	0.00284346	0.00235284	0.00618236	0.00195287	0.00263509	0.00269362	0.00210232	0.00209875	0.0121199	0.00501487	0.00951256	0.00680255	0.0211885	0.00654619	0.00410103	0.00311386	0.00915994	0.00282412	0.00167968	0.00181901	0.00159776	0.00168856	0.00965347	0.00416881	0.0081551	0.00604402	0.0180374	0.00560125	0.00347224	0.00273335	0.00767115	0.00238849
-64	0.000711268	0.000946724	0.00107398	0.00127383	0.00721292	0.00333937	0.00685483	0.00532236	0.0149673	0.0046792	0.00288085	0.00237133	0.00628669	0.0019787	0.00260221	0.00268548	0.00206579	0.00208923	0.0120565	0.00501042	0.0095694	0.00683412	0.0212677	0.00657152	0.00413555	0.00313838	0.00929897	0.00286126	0.00165674	0.0018161	0.00156988	0.00168153	0.00963472	0.00417489	0.00821212	0.00607824	0.0181175	0.00562536	0.0035082	0.00275485	0.00779283	0.00241998
-63	0.000701382	0.000938666	0.00105871	0.00126388	0.00724887	0.00335157	0.00692545	0.00536181	0.0150457	0.00470205	0.00292389	0.00238917	0.00639576	0.00200379	0.00256908	0.002667	0.00203067	0.00207588	0.0120244	0.00500464	0.00965184	0.00686912	0.0213605	0.00658824	0.0041846	0.00316133	0.00945802	0.00289349	0.00163523	0.00180283	0.00154469	0.00166988	0.00963663	0.0041781	0.00828865	0.00611547	0.0182031	0.00564515	0.00355425	0.00277525	0.00792689	0.00244864
-62	0.000688227	0.0009229	0.00104584	0.00125111	0.00726632	0.00335794	0.00700247	0.00539844	0.0151119	0.00472251	0.00297053	0.0024061	0.00650579	0.00202858	0.00252753	0.00264041	0.00199787	0.00205772	0.0119852	0.00498966	0.00975023	0.00690384	0.0214427	0.00659639	0.0042438	0.00318271	0.00962333	0.00292125	0.00160788	0.00178166	0.00152186	0.00165441	0.00962575	0.0041738	0.00837635	0.00615114	0.0182773	0.00565945	0.00360716	0.00279441	0.00806456	0.00247492
-61	0.000671801	0.000901279	0.00103408	0.00123535	0.00727167	0.00335539	0.00708316	0.00542768	0.0151733	0.00473778	0.00302068	0.00242135	0.00662136	0.00205365	0.00248438	0.00260337	0.00197089	0.00203085	0.0119408	0.00495905	0.00986309	0.00693347	0.0215163	0.00659751	0.00431287	0.00320164	0.00979352	0.00294523	0.00157809	0.00175233	0.00150249	0.0016331	0.00960621	0.00415722	0.00847313	0.00618058	0.0183448	0.00566765	0.00366678	0.00281149	0.00820744	0.00249944
-60	0.000659496	0.000870425	0.00102497	0.00121763	0.00729228	0.0033473	0.00716733	0.00545311	0.0152322	0.00474733	0.00307432	0.00243963	0.00674003	0.00207877	0.00245471	0.00254645	0.00195568	0.00199975	0.0119442	0.0049306	0.00999176	0.00696505	0.0215986	0.00660292	0.00438961	0.00322441	0.00996137	0.00296742	0.0015571	0.00170844	0.00149033	0.00160869	0.00961826	0.00413895	0.00857955	0.00620908	0.0184154	0.00567512	0.00373196	0.00283202	0.0083507	0.0025231
-59	0.000652188	0.000834247	0.00101908	0.00119859	0.00733052	0.00333354	0.00725401	0.00547939	0.0152884	0.00475106	0.00313345	0.00246032	0.00686097	0.00210381	0.00243904	0.00248055	0.00194693	0.00197044	0.0120113	0.00491024	0.0101341	0.00700365	0.0216866	0.00661877	0.00447708	0.0032515	0.0101245	0.00299179	0.00154562	0.0016574	0.00148301	0.00158451	0.00967091	0.00412189	0.00869407	0.00624152	0.0184875	0.00568491	0.00380527	0.00285591	0.00849274	0.0025478
-58	0.00064858	0.000795159	0.00101435	0.00117549	0.00737003	0.00332007	0.00733575	0.00550689	0.0153285	0.0047533	0.00319327	0.0024816	0.00698451	0.0021305	0.00242218	0.00242794	0.00193923	0.00194484	0.0121084	0.00490865	0.0102784	0.00704561	0.0217539	0.00663839	0.00456714	0.00327944	0.0102795	0.00301953	0.00153538	0.00161155	0.00147679	0.00156017	0.00973924	0.00411436	0.00880709	0.00627625	0.0185412	0.00569585	0.00388021	0.00288052	0.008632	0.00257501
-57	0.000643558	0.000761688	0.0010153	0.00115078	0.00741483	0.00331389	0.00741235	0.00554104	0.0153665	0.00475883	0.00325599	0.00250529	0.00710951	0.00216068	0.00238652	0.00237052	0.00192912	0.0019204	0.012252	0.00492196	0.0104223	0.00709822	0.0218303	0.00666269	0.00466203	0.00330948	0.0104303	0.00305137	0.00151504	0.00156611	0.00147221	0.00153559	0.00983344	0.00411793	0.00891734	0.00631963	0.0185984	0.00571076	0.00395901	0.00290739	0.00876989	0.00260603
-56	0.000630746	0.000739228	0.00102101	0.00112989	0.00747689	0.00331145	0.00748927	0.00558196	0.0154247	0.00476771	0.00332629	0.00253372	0.0072436	0.00219385	0.002333	0.00229541	0.0019154	0.00189172	0.0124457	0.00493009	0.0105758	0.00716348	0.0219454	0.00669116	0.00477031	0.00334672	0.0105904	0.00308657	0.00148187	0.00151732	0.00146821	0.00151081	0.00996132	0.00412077	0.00903253	0.00637272	0.018685	0.00572944	0.0040483	0.00294022	0.00891697	0.00264021
-55	0.00061217	0.000720989	0.00102538	0.00111337	0.00754893	0.00330934	0.00757273	0.00562098	0.0155045	0.00477584	0.00340359	0.00256624	0.00738671	0.0022301	0.0022748	0.00222681	0.00190344	0.00186128	0.0126617	0.00492397	0.0107459	0.00722908	0.0221044	0.00671805	0.00488856	0.00339062	0.0107586	0.00312488	0.00144349	0.0014739	0.00146441	0.00148732	0.0101053	0.00411665	0.00915931	0.00642503	0.0188044	0.00574695	0.00414608	0.00297843	0.00907266	0.00267749
-54	0.000588963	0.000705601	0.00102731	0.0011028	0.00761185	0.00331073	0.00765473	0.00565864	0.0155874	0.00478419	0.00348083	0.00260446	0.00752811	0.00227012	0.00221525	0.00215569	0.00189582	0.00182712	0.0128673	0.00490626	0.0109126	0.00729252	0.0222611	0.00674134	0.0050039	0.00344193	0.0109257	0.00316689	0.00140211	0.00143064	0.00146156	0.00146496	0.0102396	0.00410849	0.00928369	0.00647558	0.0189243	0.00576276	0.00424236	0.0030232	0.00922689	0.00271851
-53	0.00056496	0.00069594	0.00102586	0.00109648	0.00766057	0.00331119	0.00772472	0.00569486	0.015666	0.00479484	0.00355491	0.00264602	0.00766786	0.00231109	0.00216401	0.00208376	0.0018939	0.00179061	0.0130645	0.00487812	0.0110596	0.00734536	0.0223916	0.00674957	0.00511402	0.00349624	0.011089	0.0032058	0.00136449	0.00138985	0.00145988	0.00144354	0.0103625	0.00409466	0.00939214	0.00652011	0.0190288	0.00577221	0.00433447	0.00307113	0.00937843	0.00275844
-52	0.000543617	0.000688298	0.00102062	0.0010914	0.00770635	0.003311	0.00778051	0.00573204	0.0157427	0.00481007	0.00362279	0.00268872	0.00781121	0.00235286	0.00212894	0.00201501	0.00189557	0.00175766	0.0132758	0.0048463	0.0111809	0.00738222	0.0225125	0.00673163	0.00521379	0.00354831	0.0112585	0.00323605	0.00133628	0.00135165	0.0014581	0.00142453	0.0104911	0.00407865	0.00948069	0.00655713	0.0191276	0.00577085	0.00441829	0.00311852	0.00953485	0.00279446
-51	0.00052509	0.000683256	0.00101249	0.00108752	0.00775657	0.00331399	0.00782368	0.00577171	0.0158108	0.00482651	0.00368603	0.00273235	0.00795343	0.0023941	0.00210664	0.00195211	0.00189823	0.00172925	0.0134964	0.00481702	0.0112723	0.00741113	0.0226198	0.00669509	0.00530486	0.00359844	0.0114319	0.00326152	0.00131587	0.00131768	0.00145536	0.00140839	0.0106265	0.0040655	0.00954799	0.00659142	0.0192153	0.0057608	0.00449544	0.00316539	0.00969266	0.00282781
-50	0.000508664	0.000684687	0.00100162	0.00108333	0.00780912	0.00331559	0.00786289	0.00581321	0.0158796	0.00484423	0.00375058	0.00277487	0.00809668	0.00243539	0.00209142	0.00190642	0.00189713	0.00170182	0.0136961	0.00478259	0.0113469	0.00743544	0.0227297	0.00664021	0.00539698	0.00364463	0.0116151	0.00328425	0.00130004	0.00129555	0.00144937	0.00139257	0.0107526	0.00404909	0.00960488	0.00662433	0.0193047	0.00574222	0.00457378	0.00320975	0.00985587	0.00285982
-49	0.000491803	0.000686885	0.000987485	0.0010777	0.00785842	0.0033146	0.00790012	0.0058546	0.0159576	0.0048647	0.00381558	0.00281847	0.00823975	0.00248026	0.00207321	0.00186667	0.00189019	0.00167255	0.0138521	0.00474548	0.011407	0.00745323	0.0228607	0.00656371	0.00548705	0.00368947	0.0118138	0.00330624	0.00128251	0.00127678	0.00143884	0.00137513	0.0108553	0.00403004	0.00965358	0.00665391	0.0194091	0.0057142	0.00465132	0.00325397	0.0100268	0.00289325
-48	0.000475735	0.000686389	0.000971729	0.00107148	0.00790401	0.0033108	0.00794377	0.00589277	0.0160548	0.00488293	0.0038849	0.0028635	0.00838879	0.00252748	0.00205919	0.00182074	0.00188102	0.00164183	0.0139741	0.00470065	0.0114641	0.00746692	0.0230175	0.00647921	0.00558132	0.00373565	0.012038	0.00333076	0.00126746	0.00125357	0.00142637	0.00135665	0.0109391	0.00400573	0.00970395	0.00667984	0.0195362	0.00568107	0.00473311	0.00329957	0.0102134	0.00292912
-47	0.000460449	0.00068071	0.00095367	0.00106516	0.00793129	0.00330403	0.00799335	0.00592628	0.0161547	0.00489832	0.00395557	0.00290943	0.00854522	0.00257538	0.00205758	0.00178628	0.00187238	0.00161055	0.0140208	0.00465203	0.0115127	0.0074761	0.0231421	0.0063959	0.00567478	0.00378274	0.0122746	0.00335833	0.00125901	0.00123349	0.00141303	0.00133786	0.010976	0.00397803	0.00975303	0.00670119	0.0196484	0.00564711	0.00481517	0.00334609	0.0104099	0.00296686
-46	0.000447553	0.000671532	0.000933824	0.0010562	0.00794164	0.00329605	0.00804012	0.00595739	0.0162441	0.0049125	0.00401947	0.00295459	0.00870157	0.00262264	0.00207198	0.0017683	0.00186287	0.00158155	0.0139985	0.00461046	0.0115286	0.00747946	0.0231984	0.00631601	0.00575484	0.00382588	0.0125094	0.00338895	0.00125977	0.00121992	0.00139835	0.00131888	0.0109701	0.00395325	0.00978438	0.00671842	0.0197213	0.00561426	0.00488715	0.00339024	0.0106055	0.00300579
-45	0.000438781	0.000662689	0.00091381	0.00104502	0.00794225	0.00328868	0.00808454	0.00599415	0.0163208	0.00492848	0.00407965	0.00300075	0.00885753	0.00266951	0.00209735	0.00175067	0.00184966	0.00155742	0.0139432	0.00457926	0.011519	0.00748986	0.0232009	0.00624333	0.0058286	0.00386841	0.012749	0.00342393	0.00126807	0.00120668	0.00138173	0.00130122	0.0109427	0.00393397	0.00980175	0.006742	0.0197609	0.00558591	0.00495413	0.00343458	0.0108033	0.00304672
-44	0.000430903	0.000655612	0.000893366	0.00103167	0.00792397	0.0032803	0.00812149	0.0060338	0.0163753	0.0049453	0.0041407	0.00304841	0.00901664	0.00271938	0.0021142	0.00174315	0.00182692	0.00153861	0.0138495	0.00455739	0.011492	0.00751904	0.0231691	0.00618269	0.00590646	0.00391469	0.0130021	0.00346818	0.00127255	0.00119938	0.00136014	0.00128514	0.0108867	0.00391885	0.00980675	0.00677642	0.0197722	0.005564	0.00502358	0.00348155	0.0110094	0.00309378
-43	0.000421159	0.000648698	0.000873059	0.0010164	0.00789302	0.00327386	0.00815607	0.00607327	0.0164229	0.00496	0.00420098	0.00309787	0.009189	0.00277374	0.00210925	0.00174535	0.00178955	0.00152256	0.0137002	0.00454567	0.0114589	0.00756806	0.0231352	0.00614179	0.00598779	0.00396709	0.0132865	0.00352707	0.0012652	0.00119702	0.0013313	0.00126948	0.0107966	0.00390977	0.00980748	0.00682067	0.0197791	0.00555089	0.00509438	0.00353248	0.0112378	0.0031504
-42	0.000410924	0.000640322	0.000854686	0.00100045	0.00786094	0.00326484	0.00819877	0.00611165	0.0164763	0.0049696	0.00426821	0.00315079	0.00937793	0.00283021	0.00208204	0.0017438	0.0017419	0.00150343	0.0135082	0.00453719	0.0114421	0.00763276	0.0231218	0.00612501	0.00608163	0.00402997	0.0136013	0.0036019	0.00124648	0.00119206	0.0012983	0.00125194	0.0106846	0.00390102	0.00982046	0.0068722	0.019799	0.0055473	0.00517492	0.00359038	0.0114896	0.00321605
-41	0.000399131	0.000631409	0.0008381	0.000983794	0.00782062	0.0032467	0.00824883	0.00614664	0.0165328	0.00497627	0.00433837	0.00320687	0.00958262	0.00288879	0.00203698	0.00173836	0.00168577	0.00148317	0.0132957	0.00452537	0.0114456	0.00770446	0.0231318	0.00612551	0.00618084	0.00410295	0.0139381	0.00368814	0.00121805	0.00118488	0.00126194	0.00123348	0.0105581	0.00388603	0.00984722	0.00692555	0.0198323	0.00555089	0.00525961	0.00365491	0.0117604	0.00328846
-40	0.000384706	0.000624008	0.000822951	0.000966641	0.0077612	0.00322443	0.00829703	0.00617722	0.01657	0.00497864	0.00440475	0.00326604	0.0098003	0.00294942	0.00198014	0.00172903	0.00162291	0.00146457	0.0130699	0.00451399	0.0114543	0.00777536	0.0231251	0.0061371	0.00627643	0.00418519	0.0142987	0.00378408	0.00118242	0.00117652	0.00122293	0.00121561	0.0104155	0.00386921	0.00987567	0.00697629	0.0198476	0.00555787	0.00534059	0.00372562	0.0120495	0.00336675
-39	0.000368622	0.000617902	0.000810605	0.000950278	0.00767897	0.00320088	0.00834068	0.00620653	0.0165779	0.00497646	0.00446784	0.00332522	0.0100397	0.00301006	0.00192156	0.0017154	0.00156252	0.00144704	0.012841	0.00450548	0.0114655	0.00784752	0.0230787	0.00616146	0.006367	0.00427209	0.0146827	0.00389016	0.00114509	0.00116665	0.00118656	0.00119866	0.01026	0.00385318	0.0099031	0.00702702	0.0198283	0.00556896	0.00541742	0.00379865	0.0123612	0.00345011
-38	0.000348392	0.000611416	0.00079959	0.00093558	0.00757001	0.00317227	0.00837023	0.00623651	0.0165554	0.00497145	0.00452342	0.00338616	0.0102873	0.00307123	0.00185483	0.0017038	0.00150252	0.00143203	0.0125987	0.00449769	0.0114644	0.00792	0.0230031	0.00618858	0.00644432	0.0043647	0.0150681	0.0040038	0.00110161	0.00115761	0.00115105	0.00118381	0.0100844	0.00383498	0.0099173	0.00707826	0.0197792	0.00558002	0.00548387	0.00387543	0.0126777	0.00353751
-37	0.000326633	0.000606136	0.000788176	0.000921165	0.00745151	0.00313505	0.00837957	0.00626502	0.0164943	0.00496004	0.00457486	0.0034499	0.0105299	0.00313387	0.0017811	0.0016916	0.00144247	0.00141747	0.0123716	0.00448388	0.0114488	0.00798801	0.0229119	0.00620746	0.00651742	0.00446351	0.015453	0.00412206	0.00105387	0.00114887	0.00111532	0.00116932	0.00991154	0.00380946	0.0099142	0.00712652	0.0197031	0.00558375	0.00554614	0.0039567	0.0129914	0.00362796
-36	0.000306488	0.000597012	0.000776696	0.000906524	0.00731707	0.0030845	0.00837275	0.00628965	0.0163917	0.00494057	0.00462858	0.0035143	0.0107743	0.00319895	0.00170253	0.00166933	0.00138765	0.00139878	0.0121624	0.00445494	0.0114351	0.00804978	0.0228144	0.00621521	0.0065976	0.00456522	0.0158426	0.0042421	0.00100451	0.00113317	0.00108217	0.00115265	0.00973974	0.00376972	0.00990393	0.00716971	0.0196031	0.00557789	0.00561309	0.00403976	0.0133085	0.00372053
-35	0.000287243	0.000581728	0.000766166	0.000890235	0.0071659	0.00302227	0.0083503	0.00630419	0.0162635	0.00491242	0.00468441	0.0035768	0.0110348	0.00326625	0.00161839	0.00163501	0.00133803	0.00137267	0.0119606	0.0044092	0.0114187	0.00809414	0.0227184	0.00621054	0.00668542	0.00466423	0.0162538	0.00436219	0.000952815	0.00110837	0.0010521	0.00113145	0.00956327	0.00371574	0.00988448	0.00719916	0.019491	0.00556148	0.00568491	0.00412051	0.0136443	0.00381422
-34	0.000270589	0.000561419	0.00075739	0.000872561	0.00701958	0.00295019	0.00832082	0.00630984	0.0161255	0.00487528	0.00474091	0.00363507	0.0113078	0.00333051	0.00154391	0.00158567	0.00129725	0.00134038	0.0117724	0.00434647	0.011398	0.00810106	0.0226171	0.00618707	0.00677394	0.00475378	0.0166662	0.00447478	0.00090725	0.00107355	0.00102732	0.00110647	0.00939599	0.00364833	0.00985943	0.00720545	0.0193713	0.00553118	0.00575742	0.00419443	0.013987	0.00390264
-33	0.000256909	0.000540359	0.000749755	0.000855419	0.00686776	0.00286917	0.0082844	0.0063088	0.0159632	0.00483033	0.00479831	0.00369061	0.0115771	0.00339433	0.0014892	0.00153236	0.00126725	0.00130871	0.0115857	0.00426731	0.0113712	0.00807646	0.022479	0.00614436	0.00685735	0.00483589	0.0170502	0.00457993	0.000873055	0.00103636	0.0010085	0.00108207	0.00922675	0.00356824	0.00982779	0.00719263	0.0192211	0.00548735	0.00582783	0.00426325	0.0143137	0.00398713
-32	0.000243153	0.000521514	0.000740522	0.000838685	0.0066999	0.00278928	0.00823399	0.00629898	0.015758	0.0047804	0.00485037	0.00374312	0.0118344	0.00346036	0.00145076	0.00148699	0.00124292	0.00128223	0.0113835	0.00418237	0.0113212	0.00803201	0.0222692	0.00608418	0.00693126	0.00490941	0.0174189	0.00467863	0.000846958	0.00100425	0.000991721	0.00106046	0.0090417	0.00348583	0.00977758	0.0071655	0.0190136	0.00543229	0.00589082	0.00432626	0.0146266	0.00406949
-31	0.000228388	0.000501869	0.000729579	0.000821924	0.00652324	0.00271672	0.00816719	0.00628447	0.0155181	0.00472535	0.00490096	0.00379429	0.0120819	0.00352889	0.00142251	0.00144271	0.00122648	0.00125538	0.0111651	0.00409721	0.0112444	0.00797391	0.0219892	0.00600699	0.0070039	0.0049745	0.0177828	0.00477391	0.00082545	0.000972289	0.000978028	0.00103865	0.00884417	0.00340697	0.00970577	0.00712919	0.0187537	0.00536617	0.00595243	0.0043844	0.0149324	0.0041514
-30	0.000212556	0.000478967	0.000717273	0.000805535	0.00634329	0.00264696	0.00808893	0.00626345	0.0152689	0.00466549	0.0049518	0.00384422	0.0123284	0.0035986	0.00139355	0.00139363	0.00121877	0.0012255	0.0109369	0.00400787	0.0111479	0.00790312	0.0216817	0.0059172	0.00707399	0.00503139	0.0181371	0.00486402	0.000803051	0.0009363	0.00096802	0.00101552	0.0086401	0.00332742	0.00961841	0.00708329	0.0184753	0.00529134	0.00601289	0.0044378	0.0152327	0.00423131
-29	0.000197448	0.000455352	0.000702998	0.000788849	0.00616575	0.00257788	0.00800478	0.00622995	0.0150186	0.00459978	0.00500132	0.00388944	0.0125696	0.00366563	0.00135893	0.00134353	0.00121281	0.00119487	0.0106984	0.00390721	0.0110396	0.00781361	0.0213752	0.00581377	0.00714497	0.00507598	0.0184913	0.00493822	0.00077819	0.000899439	0.000957902	0.000991859	0.00843208	0.00324254	0.00952218	0.00702178	0.0181969	0.00520677	0.00607315	0.00448271	0.0155305	0.00430193
-28	0.000186622	0.00043284	0.000688037	0.000770961	0.00600136	0.00251226	0.00791789	0.00618479	0.0147613	0.0045298	0.00505456	0.00392649	0.0128112	0.00373086	0.00134003	0.00129211	0.00120958	0.00116314	0.010469	0.00380023	0.0109336	0.00770947	0.0210679	0.00570312	0.00722771	0.00510429	0.0188552	0.00499746	0.000763324	0.000862477	0.00094881	0.00096705	0.00823517	0.00315624	0.00942575	0.00694713	0.0179146	0.00511646	0.00614113	0.00451539	0.0158332	0.00436416
-27	0.000179876	0.00040771	0.00067377	0.000751632	0.00584008	0.00245275	0.0078367	0.00613093	0.0145155	0.00446032	0.00511041	0.00395702	0.0130583	0.00379709	0.00134047	0.00123618	0.00120918	0.00113162	0.0102375	0.00369439	0.0108378	0.0075967	0.0207822	0.00559384	0.00731537	0.00512135	0.019227	0.00505112	0.000760174	0.000821947	0.000941477	0.000941625	0.00803878	0.00307357	0.00933727	0.00686382	0.0176488	0.00502708	0.00621289	0.00453919	0.0161427	0.0044241
-26	0.000172325	0.000382437	0.000658191	0.000731274	0.0056856	0.00240343	0.00775613	0.00606943	0.0142743	0.00438989	0.00515825	0.00398206	0.0132969	0.00386252	0.00134131	0.00118243	0.00120746	0.00110217	0.00998889	0.00359409	0.0107374	0.00747978	0.0205035	0.00548483	0.00739092	0.00513063	0.0195977	0.00510069	0.000756816	0.000782433	0.000932824	0.000916722	0.00783724	0.00299876	0.00924678	0.0067746	0.0173889	0.00493736	0.00627458	0.00455634	0.0164473	0.0044816
-25	0.000162047	0.000359776	0.000639879	0.000710879	0.00553625	0.00236327	0.00766874	0.00600081	0.0140156	0.00431551	0.00519271	0.00400295	0.0135075	0.00392307	0.00134104	0.00113592	0.00120179	0.00107517	0.00972196	0.00350596	0.0106243	0.00735921	0.020198	0.00537169	0.00744419	0.00513423	0.0199497	0.00514116	0.000751543	0.000747846	0.000920836	0.000893025	0.0076291	0.00293461	0.00914653	0.00668001	0.0171068	0.0048436	0.00631845	0.00456859	0.0167286	0.00453211
-24	0.000149933	0.000338823	0.000619508	0.000691082	0.00538936	0.00232966	0.00757804	0.00592718	0.0137473	0.00423926	0.00521724	0.00402295	0.0137033	0.00398346	0.00134048	0.00109473	0.00119203	0.00105158	0.00946078	0.00343089	0.0105131	0.00724597	0.0198893	0.00525952	0.00748541	0.00513942	0.0203193	0.00518061	0.000745206	0.000716776	0.000905768	0.00087133	0.00742507	0.00288027	0.00904557	0.00658658	0.0168183	0.00474939	0.00635132	0.00458119	0.0170113	0.00458204
-23	0.00013739	0.000317084	0.000596738	0.000669266	0.00524957	0.00229547	0.00747612	0.00584334	0.0134614	0.00415611	0.00522767	0.00403116	0.0138749	0.00403387	0.00133078	0.0010472	0.00117639	0.00102265	0.00922125	0.00335928	0.0103913	0.00713211	0.0195686	0.00514357	0.0075146	0.00513346	0.0206792	0.00521197	0.000734082	0.000682144	0.000886565	0.000845958	0.00723541	0.00282737	0.00893373	0.00648773	0.016515	0.00464984	0.00637114	0.00458231	0.017277	0.00462292
-22	0.000126031	0.000293687	0.000573443	0.000645094	0.00511082	0.00225125	0.00735684	0.00574553	0.0131579	0.00406141	0.00522196	0.00402263	0.0140065	0.00406777	0.00131351	0.000988683	0.00115529	0.000983473	0.00899231	0.00327764	0.0102545	0.00700637	0.0192236	0.00501942	0.00752868	0.00511019	0.0209716	0.00522908	0.000719772	0.000641185	0.000864366	0.000814284	0.00705156	0.00276444	0.00880568	0.00637595	0.0161907	0.00454041	0.00637532	0.00456641	0.0174891	0.00464842
-21	0.000117112	0.000271304	0.000551104	0.000620528	0.00498469	0.00219949	0.00723256	0.00563792	0.0128568	0.00396365	0.0052109	0.00400423	0.0141173	0.00409257	0.00129119	0.000931292	0.00112711	0.000942273	0.00878356	0.00319073	0.0101251	0.00687481	0.0188935	0.00489822	0.00754734	0.00507994	0.021231	0.00523884	0.000704149	0.000601298	0.000839109	0.0007814	0.00688412	0.00269511	0.00867885	0.00625637	0.0158752	0.00443094	0.00637912	0.00454209	0.0176741	0.0046657
-20	0.00011115	0.000251085	0.000529972	0.000595579	0.00486157	0.00214259	0.00710067	0.00552281	0.0125453	0.00386449	0.00519478	0.00397556	0.014192	0.0041083	0.00126902	0.000879957	0.00109237	0.000902534	0.0085806	0.00310256	0.00999498	0.00674024	0.0185594	0.00478066	0.00757134	0.00504507	0.0214447	0.0052431	0.000690084	0.000565521	0.000811169	0.000749056	0.00672108	0.00262257	0.00854782	0.00613153	0.0155524	0.00432258	0.00638306	0.00451031	0.0178183	0.0046757
-19	0.000106739	0.000231117	0.000509648	0.000570378	0.00472853	0.00207978	0.00694737	0.00540003	0.0121988	0.00375942	0.00516035	0.00393838	0.0142067	0.00411562	0.00125504	0.00083165	0.00105485	0.000863131	0.0083697	0.00301451	0.00983893	0.00660265	0.018166	0.00466036	0.00758209	0.00501026	0.0215642	0.00524667	0.000680889	0.000531384	0.000782248	0.000716755	0.00654911	0.00254715	0.00839315	0.00600134	0.0151824	0.00420989	0.00637122	0.00447432	0.0178855	0.00468114
-18	0.000102612	0.000211751	0.000490009	0.000545145	0.00459227	0.00201513	0.00677963	0.00527193	0.0118379	0.00364887	0.00510685	0.0038965	0.0141729	0.00411247	0.00123117	0.00078659	0.00101553	0.000823304	0.00815636	0.00293083	0.00965487	0.00647091	0.0177247	0.00454051	0.00757333	0.00499257	0.0216051	0.00526102	0.000666894	0.00049917	0.00075277	0.000684225	0.00637432	0.00247298	0.00821725	0.00587142	0.0147813	0.00409469	0.00634009	0.00444453	0.017889	0.00468674
-17	9.59465e-05	0.000194831	0.000470512	0.000521018	0.00446204	0.00194916	0.00659487	0.00513692	0.0114578	0.00353161	0.00503386	0.00384545	0.0140959	0.00409234	0.00118682	0.00074717	0.000976659	0.000784743	0.00795635	0.00284795	0.00943967	0.00634034	0.0172259	0.00441772	0.0075391	0.00498071	0.0215752	0.00527466	0.000641385	0.000471001	0.000723585	0.000652881	0.0062092	0.00239855	0.00801727	0.00573863	0.0143418	0.00397466	0.00628648	0.00441308	0.0178355	0.0046835
-16	8.82755e-05	0.000180087	0.000452432	0.00049845	0.00433073	0.00187902	0.00639486	0.00499203	0.0110585	0.00340831	0.00494801	0.00378456	0.0139763	0.00405648	0.00113735	0.000711638	0.000938664	0.000749342	0.00776284	0.00276109	0.00920473	0.00619462	0.0166812	0.00428619	0.00748765	0.00495806	0.0214672	0.00527208	0.000612814	0.000445862	0.000695548	0.000623896	0.00604678	0.00232006	0.00779979	0.00559332	0.0138699	0.00384725	0.00621783	0.00437131	0.0177218	0.00466428
-15	8.20621e-05	0.00016773	0.000436687	0.000476521	0.00419142	0.00180038	0.00618223	0.00483771	0.0106465	0.0032804	0.00485176	0.00371108	0.013813	0.00400736	0.00108661	0.000680167	0.000901993	0.000716088	0.00755688	0.00266177	0.00895079	0.00603692	0.0161016	0.00414913	0.00742178	0.00492306	0.0212603	0.00525754	0.000584334	0.000423948	0.00066934	0.000596304	0.00587415	0.00223107	0.00756651	0.00543732	0.0133741	0.00371476	0.00613677	0.00431707	0.0175366	0.00463245
-14	7.57809e-05	0.00015868	0.000421953	0.000454285	0.00403013	0.00171462	0.00594775	0.00467122	0.0102057	0.00314511	0.00473795	0.00362109	0.0135857	0.00394161	0.00103193	0.000656774	0.000864864	0.000682494	0.00731169	0.00255088	0.00865933	0.00586818	0.0154669	0.00400395	0.00732998	0.00487044	0.0209356	0.00522915	0.000553856	0.000407727	0.000643409	0.000568389	0.00567091	0.00213275	0.00730354	0.0052697	0.0128363	0.00357453	0.00603397	0.00424576	0.0172607	0.00458538
-13	6.92458e-05	0.000152397	0.000409264	0.000434623	0.00386164	0.00163297	0.00570791	0.00450314	0.00976737	0.00301142	0.00461808	0.00352968	0.0133208	0.00387112	0.000980895	0.000644011	0.000830252	0.000654103	0.00705394	0.00244344	0.00835862	0.00570073	0.0148344	0.003861	0.00723114	0.00481608	0.0205757	0.0051982	0.00052507	0.000398204	0.000619758	0.000544363	0.00545779	0.0020382	0.00703327	0.00510193	0.0123009	0.00343621	0.00592461	0.00417288	0.0169483	0.00453466
-12	6.20764e-05	0.000147989	0.00039806	0.000418318	0.00369868	0.00155975	0.00547171	0.00433977	0.00934167	0.00288444	0.00449438	0.00344348	0.0130342	0.00380046	0.000937119	0.000639947	0.000802161	0.000633428	0.00680645	0.00234664	0.00805726	0.00554256	0.0142323	0.00372709	0.00712472	0.00476978	0.020206	0.00517021	0.000499598	0.000393968	0.00060011	0.000525873	0.00525257	0.00195319	0.00676448	0.00494117	0.011787	0.00330576	0.00580955	0.00410663	0.0166201	0.00448534
-11	5.29294e-05	0.000142864	0.000386534	0.000402671	0.00350921	0.00148502	0.00521674	0.00416678	0.00888084	0.0027506	0.0043401	0.00334649	0.0126738	0.00371438	0.000896946	0.000638184	0.000779492	0.000615359	0.00652235	0.00224756	0.00771239	0.00537467	0.0135787	0.00358524	0.0069627	0.00471414	0.0197327	0.0051295	0.000474938	0.000390524	0.000583013	0.000509015	0.00501578	0.00186629	0.00646456	0.00477072	0.0112298	0.00316792	0.0056514	0.00403031	0.0162032	0.00442194
-10	4.30674e-05	0.000136308	0.000373956	0.000386638	0.00330379	0.00140638	0.00493968	0.00398096	0.00838316	0.00260662	0.00415277	0.00323414	0.0122353	0.00360982	0.000857653	0.000636428	0.000759352	0.000597435	0.00620937	0.00214247	0.00732533	0.00519079	0.0128624	0.00342972	0.00674443	0.00463801	0.0191539	0.00506846	0.00045036	0.000386368	0.000566654	0.000492037	0.00475658	0.00177442	0.0061325	0.00458588	0.0106228	0.00301817	0.0054486	0.00393607	0.0156946	0.00433914
-9	3.25182e-05	0.000131197	0.000360637	0.000370489	0.00309549	0.00132575	0.00465535	0.00378666	0.00787895	0.00245972	0.00395631	0.0031106	0.0117469	0.00348904	0.000813851	0.000636184	0.000739735	0.000579702	0.00588263	0.00203286	0.00692177	0.00499524	0.0121298	0.00326868	0.0064964	0.0045435	0.0185097	0.00498731	0.000423185	0.00038369	0.000550186	0.000475096	0.00448906	0.0016793	0.00578856	0.00439095	0.0100044	0.0028642	0.00522635	0.00382705	0.0151283	0.00423818
-8	2.15283e-05	0.00012715	0.00034629	0.000355038	0.00287103	0.00123849	0.00436032	0.00358413	0.00735219	0.00231167	0.00374906	0.00297664	0.0112068	0.00335653	0.000774183	0.00063812	0.000719512	0.000563612	0.00552888	0.00191182	0.00650233	0.00477113	0.0113652	0.00309392	0.00622404	0.00440725	0.0178036	0.00486365	0.000397855	0.000382635	0.000532901	0.000459325	0.00419996	0.00157516	0.00543132	0.00417763	0.0093587	0.00270279	0.00498655	0.00369195	0.0145052	0.00411009
-7	1.18097e-05	0.000123148	0.000330289	0.00033952	0.00262459	0.00114149	0.00405516	0.00337324	0.00680584	0.00216037	0.00352444	0.00283028	0.0106085	0.003212	0.000747325	0.000640675	0.000696295	0.000547546	0.00513763	0.00177773	0.00607318	0.00451992	0.0105839	0.00290416	0.00593262	0.00423081	0.0170436	0.00469661	0.000379567	0.000381911	0.000513292	0.000443533	0.00388111	0.00145961	0.00506417	0.00394658	0.00869487	0.00253227	0.00472853	0.00353054	0.0138261	0.0039543
-6	2.78733e-06	0.000119674	0.000312775	0.000323263	0.00236489	0.00103845	0.00374373	0.00315589	0.00625333	0.00200554	0.00328165	0.00266924	0.00995361	0.00304952	0.000731114	0.000644995	0.000670631	0.0005287	0.0047204	0.00163745	0.00563646	0.00426244	0.00979581	0.00271118	0.00562769	0.0040393	0.0162517	0.00450792	0.000366951	0.000382334	0.000491703	0.000425981	0.00354265	0.00133795	0.00469009	0.00370917	0.00802457	0.00235836	0.00445467	0.00335427	0.0131027	0.00377872
-5	-6.0592e-06	0.000115587	0.000294162	0.000307234	0.00210471	0.000937519	0.00343302	0.00293697	0.00570183	0.00185145	0.00302476	0.0024988	0.00925458	0.00287211	0.000724681	0.00064854	0.000644276	0.000508202	0.00430136	0.00149989	0.00520413	0.00400327	0.00901376	0.00251937	0.00532062	0.003838	0.0154442	0.00430205	0.000359311	0.000382063	0.000469219	0.000407718	0.00320304	0.00121871	0.00431857	0.00347012	0.0073578	0.00218541	0.00417269	0.0031684	0.0123494	0.00358708
-4	-1.42683e-05	0.000109351	0.000274917	0.000292172	0.00185735	0.00083969	0.00313064	0.00271763	0.00516263	0.00170189	0.00276303	0.0023234	0.00852127	0.0026796	0.000722631	0.000645343	0.000618364	0.000488248	0.00390366	0.00136474	0.00479096	0.00374087	0.00825327	0.0023328	0.00501943	0.00363223	0.0145913	0.00407754	0.000354181	0.000377347	0.00044664	0.00039021	0.0028805	0.00110222	0.0039608	0.00322925	0.00670795	0.00201734	0.00389123	0.00297781	0.0115563	0.00337857
-3	-2.20091e-05	0.000101809	0.000255747	0.00027715	0.00161591	0.000740831	0.00283412	0.00249706	0.00463326	0.00155618	0.00249628	0.00214003	0.00775153	0.00247014	0.000727229	0.000635975	0.000596073	0.000467835	0.00351476	0.00122701	0.0043878	0.00347276	0.00749848	0.00215058	0.00471114	0.00341813	0.0136531	0.00383275	0.00035261	0.000368892	0.00042591	0.000372493	0.00256534	0.00098392	0.00361096	0.00298491	0.00606587	0.00185338	0.00360371	0.00277908	0.0107023	0.00315144
-2	-2.73669e-05	9.44237e-05	0.000238272	0.000262387	0.00138134	0.000643204	0.00254949	0.00228067	0.00412627	0.00141734	0.00223113	0.00195026	0.00697475	0.00225192	0.000730428	0.000625263	0.000576797	0.000448118	0.00313751	0.00109108	0.0039992	0.00320277	0.00676324	0.00197477	0.0044014	0.00319358	0.0126799	0.00357399	0.00035153	0.000359843	0.000407534	0.000355253	0.00225943	0.000867141	0.00327434	0.00274172	0.00544476	0.00169606	0.00331627	0.00257192	0.00982734	0.00291295
-1	-2.96808e-05	8.99738e-05	0.00022273	0.000249121	0.00117349	0.000553075	0.00228876	0.00207566	0.00366893	0.00129084	0.00198343	0.00176128	0.00622858	0.00203181	0.000727928	0.000613911	0.000557285	0.000430164	0.00280333	0.000963866	0.00364709	0.00294073	0.00608912	0.00181215	0.00411409	0.00296341	0.0117418	0.00330532	0.000349124	0.000351943	0.000390008	0.000339642	0.00198841	0.00075847	0.00296792	0.00250819	0.00487902	0.00155149	0.00304876	0.00236235	0.00898518	0.00266856
0	-3.09851e-05	8.98862e-05	0.000209434	0.000238931	0.000993798	0.000473788	0.00206195	0.00188961	0.00327617	0.00118113	0.0017604	0.0015803	0.0055368	0.00181661	0.000734083	0.000606077	0.000540018	0.000415554	0.00251556	0.000849516	0.00334566	0.00269967	0.00551031	0.00167047	0.00386138	0.00273866	0.0108749	0.00303795	0.000351549	0.000347982	0.000374726	0.000327243	0.00175468	0.000661652	0.0027038	0.00229464	0.00439324	0.0014258	0.00281089	0.00215948	0.00820586	0.00242728
1	-3.19321e-05	9.07427e-05	0.000197775	0.000231265	0.000844969	0.000406653	0.0018671	0.00172461	0.00294073	0.00108734	0.00155413	0.00140858	0.00489733	0.00161037	0.000745943	0.000601938	0.000525129	0.000404052	0.00228021	0.0007524	0.00309305	0.00248239	0.00502962	0.0015495	0.00363954	0.00251826	0.0100874	0.00277632	0.000357005	0.00034634	0.000361452	0.000317658	0.00156259	0.000579527	0.00248008	0.0021035	0.00398517	0.00131842	0.00259683	0.00196342	0.00749235	0.00219334
2	-3.33817e-05	8.98364e-05	0.000186985	0.000223867	0.00072746	0.000350566	0.00169745	0.00157346	0.00265493	0.00100378	0.00136026	0.00124317	0.00429513	0.00140845	0.000752449	0.000593689	0.000511928	0.000392522	0.0020967	0.000671243	0.00287889	0.00228948	0.00463648	0.00144689	0.00344105	0.00230709	0.00936136	0.0025265	0.000359533	0.000341763	0.000349456	0.000308195	0.00141208	0.000510904	0.00228817	0.00193147	0.00364571	0.00122533	0.00240066	0.00177513	0.00682825	0.00196747
3	-3.38632e-05	8.79615e-05	0.000178646	0.000217241	0.000642787	0.000308479	0.00155453	0.00143855	0.00242255	0.000933258	0.00118863	0.00109214	0.00375152	0.0012185	0.000756943	0.000583558	0.000502683	0.000382073	0.00197055	0.000609669	0.00270124	0.00212487	0.00432837	0.00136559	0.0032766	0.00211731	0.00870627	0.00230071	0.00036154	0.00033576	0.000340665	0.000299657	0.00130667	0.000459074	0.00212788	0.00178171	0.00337546	0.00114942	0.00223262	0.00160472	0.00622889	0.00175961
4	-3.14786e-05	8.57721e-05	0.000173662	0.000212888	0.00058978	0.000280925	0.00144209	0.00132522	0.00224767	0.000879904	0.00104714	0.000963294	0.00328906	0.00105123	0.000762471	0.00057364	0.000499037	0.00037561	0.00190386	0.000568558	0.00255884	0.00198625	0.00410606	0.00130486	0.00314123	0.00194767	0.00810605	0.00209983	0.000365496	0.000329706	0.00033635	0.000294249	0.00124682	0.000424741	0.00200047	0.00165573	0.00317686	0.00109238	0.00209418	0.00145548	0.00569756	0.00157553
5	-2.76354e-05	8.32742e-05	0.000171484	0.000210532	0.000560921	0.000263117	0.00135624	0.00123071	0.00212384	0.000840576	0.000931104	0.000854283	0.00289929	0.000906139	0.000763883	0.000563883	0.000500313	0.000373206	0.00188388	0.000542029	0.00244658	0.00186953	0.00395422	0.00126089	0.00302667	0.00179471	0.00757656	0.00191834	0.000368124	0.000323578	0.000335899	0.000291869	0.0012224	0.000402573	0.00190141	0.00155012	0.00303903	0.00105073	0.00197889	0.0013245	0.00523792	0.00141224
6	-2.33564e-05	8.13402e-05	0.000171321	0.000209474	0.000547831	0.000252926	0.00129047	0.00115302	0.0020386	0.000811021	0.000832993	0.000761074	0.002575	0.000784324	0.000762253	0.000556497	0.000505027	0.000373934	0.00189073	0.000527215	0.00235496	0.00177129	0.00385452	0.00122755	0.00292336	0.0016496	0.00713611	0.00174993	0.000369448	0.000318919	0.000338174	0.000291704	0.00121928	0.000390071	0.00182271	0.00146216	0.00294656	0.00101928	0.00187818	0.00120534	0.00485556	0.00126713
7	-1.92003e-05	8.04253e-05	0.000171627	0.000208657	0.000544289	0.000248198	0.001235	0.00108648	0.00197157	0.000786181	0.000748116	0.000680969	0.00230986	0.000683185	0.000746866	0.00055309	0.000505855	0.000377083	0.00190586	0.000520541	0.00227093	0.00168646	0.00378125	0.00119876	0.00282511	0.00151103	0.00676278	0.00159176	0.000363833	0.000316758	0.000338741	0.00029287	0.00122507	0.00038437	0.00175296	0.00138647	0.00287641	0.000992472	0.00178661	0.001096	0.00453632	0.00113747
8	-1.67241e-05	8.01131e-05	0.000170942	0.000207112	0.000544351	0.000245755	0.00117924	0.00102386	0.00190662	0.000760771	0.000671225	0.00061122	0.00207786	0.000596116	0.000725185	0.000553538	0.000500852	0.000380612	0.00191523	0.000517052	0.00218738	0.00160851	0.00371167	0.00116913	0.00273262	0.00137925	0.00643213	0.00144032	0.00035423	0.000316826	0.000335897	0.000293862	0.00122979	0.000381403	0.00168331	0.00131618	0.00280915	0.00096495	0.00170192	0.000995236	0.004255	0.00101822
9	-1.57101e-05	7.87832e-05	0.000169881	0.000205068	0.00054376	0.000244664	0.00112415	0.000967319	0.0018433	0.000735514	0.000601057	0.00055375	0.0018719	0.00052497	0.000714355	0.000556233	0.00049581	0.000384978	0.00191462	0.000516838	0.00210429	0.00153894	0.00364479	0.00113817	0.00265174	0.00125775	0.00612695	0.00130015	0.000349323	0.000317508	0.000332845	0.000295023	0.00122919	0.000380751	0.00161422	0.00125313	0.00274405	0.000936844	0.0016264	0.000905751	0.00399943	0.00091256
10	-1.56455e-05	7.38133e-05	0.000168843	0.000201146	0.000539624	0.000243471	0.00106556	0.000912627	0.0017722	0.00070853	0.000533392	0.000506247	0.00168226	0.000466142	0.000701758	0.00055593	0.000491709	0.000390542	0.00190573	0.000518076	0.00201191	0.00147001	0.00355717	0.00110188	0.00257338	0.00114513	0.00582307	0.00116754	0.000343056	0.000314872	0.000330276	0.000295844	0.00122268	0.000380774	0.00153874	0.00119132	0.00266469	0.000905206	0.00155338	0.000825688	0.00375267	0.000816841
11	-1.53596e-05	6.64475e-05	0.000168622	0.000195408	0.000526182	0.000241012	0.00100137	0.000856365	0.00169103	0.000678688	0.000466934	0.000465156	0.00150822	0.000416029	0.00068933	0.000557635	0.000490149	0.00039816	0.00187988	0.000517299	0.00190642	0.00139768	0.0034391	0.00105986	0.00248318	0.00104154	0.00550746	0.0010423	0.000336985	0.000312041	0.000329385	0.000296784	0.00120303	0.000379156	0.0014539	0.00112702	0.00256507	0.000869275	0.00147506	0.000753346	0.00350784	0.000729167
12	-1.38485e-05	5.98258e-05	0.000169648	0.000189412	0.000505929	0.000238903	0.0009386	0.000804724	0.00161211	0.000649854	0.000408887	0.00043208	0.00135785	0.000377141	0.000682319	0.00056985	0.000490374	0.000409576	0.00183541	0.000516778	0.00179714	0.0013279	0.00330712	0.00101764	0.00237784	0.000953828	0.00516891	0.000932209	0.000334235	0.000314838	0.000330011	0.000299494	0.00117067	0.000377841	0.00136787	0.00106631	0.00245962	0.000833747	0.00139337	0.000692954	0.00326338	0.000654675
13	-1.25589e-05	5.40802e-05	0.000170811	0.000183676	0.000480022	0.000235476	0.000877243	0.000757194	0.00153139	0.00062159	0.000357825	0.000403989	0.00121684	0.000346112	0.000670364	0.000586475	0.000490215	0.000423577	0.00177058	0.000514024	0.0016844	0.0012586	0.00315483	0.000974893	0.00224756	0.000875792	0.00479035	0.000832651	0.000328902	0.000320278	0.000330513	0.000303626	0.0011253	0.00037475	0.00128082	0.0010079	0.00234311	0.000798241	0.00130269	0.000639891	0.0030036	0.000589381
14	-1.35768e-05	4.87828e-05	0.000170755	0.000177731	0.000447305	0.000228738	0.000813014	0.000710252	0.00144074	0.000591518	0.000306548	0.000376145	0.00107254	0.000318404	0.000647072	0.000602246	0.000486209	0.000437897	0.00168941	0.000505462	0.00156871	0.00118759	0.00297847	0.000929358	0.00209956	0.000800177	0.00439437	0.000737867	0.000316747	0.000325514	0.000328482	0.000307814	0.00106836	0.0003671	0.00119086	0.000948923	0.00220961	0.000760438	0.00120305	0.000588161	0.00273345	0.000528136
15	-1.62344e-05	4.47438e-05	0.00016947	0.000171262	0.000409652	0.000219534	0.000745516	0.000663703	0.00134371	0.00055989	0.000259879	0.000348569	0.000934287	0.000292602	0.000617516	0.000620913	0.000477124	0.000451433	0.00159804	0.000492418	0.00144728	0.00111579	0.00279022	0.000881158	0.00193237	0.000728345	0.0039663	0.000649512	0.000300641	0.000332829	0.000323297	0.000311348	0.00100385	0.000355976	0.0010964	0.000889746	0.00206696	0.000720524	0.00109612	0.000538457	0.00245029	0.000471057
16	-1.83222e-05	4.22357e-05	0.000168235	0.000163946	0.000370459	0.000209271	0.000677895	0.000619597	0.00124708	0.000529129	0.00022171	0.000324137	0.000811356	0.000269465	0.000594808	0.000645791	0.000466703	0.000465669	0.00149758	0.000477895	0.00132676	0.00104628	0.00260772	0.000833949	0.00175904	0.000667267	0.00352508	0.000574038	0.000288243	0.000344013	0.000317469	0.000314807	0.000934021	0.000343583	0.00100233	0.000832938	0.0019274	0.000681539	0.000990375	0.000495702	0.00216822	0.000421751
17	-1.94606e-05	3.98094e-05	0.00016759	0.000156529	0.000331556	0.000199393	0.000615679	0.000580579	0.00116011	0.000501483	0.000189489	0.000302906	0.000701941	0.000249405	0.000587017	0.000671146	0.000459822	0.000480524	0.00140153	0.000464535	0.00122002	0.000982741	0.00245022	0.000791251	0.00159269	0.000616591	0.00311421	0.000512026	0.000283778	0.000355478	0.000313706	0.000318527	0.000866541	0.000331964	0.000917848	0.00078166	0.00180516	0.000646367	0.000891088	0.000459749	0.00190808	0.000380715
18	-2.03327e-05	3.73313e-05	0.000167248	0.000149953	0.000294198	0.000190071	0.000563395	0.000548329	0.00108707	0.000477804	0.000164243	0.000284102	0.000608527	0.000231717	0.000584913	0.000693233	0.00045609	0.000494594	0.00131715	0.000451819	0.00112623	0.000927618	0.00231481	0.000754256	0.0014296	0.000573867	0.00272781	0.000461485	0.00028229	0.000365282	0.000311669	0.000322273	0.000805672	0.000320945	0.000844814	0.000737973	0.00170094	0.00061603	0.00079692	0.000428985	0.00166817	0.000346601
19	-2.03157e-05	3.40663e-05	0.000166525	0.00014382	0.000261088	0.000180864	0.000520199	0.000521216	0.0010254	0.000457588	0.000146928	0.000266686	0.000534333	0.000216023	0.000580966	0.000710956	0.00045275	0.000506039	0.00124438	0.000437405	0.00104453	0.000879231	0.00219611	0.000723204	0.00126446	0.000537637	0.00236957	0.000421681	0.000280325	0.000372511	0.000309638	0.00032493	0.000752736	0.000309135	0.000782363	0.000700223	0.00161075	0.000590396	0.000705692	0.000402162	0.00145195	0.000318852
20	-1.92268e-05	3.15463e-05	0.000165452	0.00013956	0.000231443	0.000172521	0.000485008	0.000499155	0.000976514	0.000440991	0.000137043	0.000250936	0.000478513	0.000203118	0.000576346	0.000725234	0.000447331	0.000512666	0.00117965	0.000422908	0.000977481	0.000839268	0.0021034	0.000699313	0.00109915	0.000508116	0.00204866	0.000392403	0.00027856	0.00037839	0.000306392	0.000326113	0.000705544	0.000297714	0.000731245	0.000669211	0.00153996	0.000570152	0.000618094	0.000379526	0.00126359	0.00029776
21	-1.84867e-05	3.2348e-05	0.000163911	0.000138008	0.000206328	0.000165089	0.000457718	0.00048279	0.000940573	0.000428024	0.000133668	0.000238321	0.000434805	0.000192594	0.000569576	0.000731013	0.000438657	0.000513629	0.00112527	0.000410422	0.000925161	0.000808636	0.00203657	0.000681797	0.000946775	0.000486202	0.0017682	0.000370938	0.000275545	0.00038168	0.000301284	0.000325819	0.000665797	0.000287756	0.000691439	0.000645713	0.00148857	0.000554911	0.000540221	0.000362262	0.0011015	0.000281766
22	-1.8119e-05	3.59884e-05	0.000161804	0.000138785	0.000188129	0.00015869	0.000436078	0.000469946	0.000911876	0.000417674	0.000134215	0.000228084	0.000402818	0.000183624	0.00056769	0.000724037	0.00042912	0.000508787	0.00108841	0.000399958	0.000884784	0.000785483	0.00198801	0.000668922	0.000816061	0.00046871	0.00154197	0.000353853	0.000274786	0.000380012	0.000295462	0.000323786	0.000638267	0.000279324	0.000660431	0.000627714	0.00144994	0.000543298	0.000475138	0.000348397	0.000972396	0.000268739
23	-1.82589e-05	4.11978e-05	0.000160073	0.000140767	0.00017598	0.000154691	0.000418047	0.000459834	0.000888648	0.000409201	0.000136026	0.000219145	0.000382275	0.00017618	0.000578079	0.000712994	0.000422534	0.000500925	0.00106967	0.000393471	0.000852985	0.000770143	0.00195427	0.000659438	0.000710507	0.000454265	0.00137145	0.000340245	0.00027991	0.000377096	0.000291304	0.000320846	0.000622826	0.000274081	0.000635516	0.000614988	0.00142146	0.000534319	0.000423266	0.000336705	0.000876864	0.000258213
24	-1.7374e-05	4.62094e-05	0.000159783	0.000143123	0.000168996	0.000152753	0.000404188	0.000451924	0.000872514	0.000402484	0.000140304	0.000212002	0.000371959	0.000169976	0.000603144	0.000701037	0.000421797	0.000492127	0.00106522	0.000390496	0.000829476	0.000759984	0.00193783	0.000652561	0.000625408	0.000443309	0.00124371	0.000328848	0.000292885	0.000373623	0.00029079	0.000317625	0.000617107	0.000271625	0.000616832	0.000605954	0.00140517	0.000527523	0.000382856	0.000327655	0.000807832	0.000249412
25	-1.44822e-05	5.00586e-05	0.000160827	0.000146146	0.000165887	0.000152412	0.000394972	0.000445996	0.00086246	0.000397434	0.000144417	0.000206932	0.000365763	0.000165539	0.000637965	0.000683263	0.000425793	0.000482727	0.00106935	0.000390407	0.000816856	0.000753809	0.00193659	0.000648702	0.000562501	0.000435068	0.00116162	0.00032031	0.000311741	0.000366661	0.00029331	0.000314437	0.000617616	0.00027141	0.000605914	0.000599903	0.00139952	0.000523068	0.000353459	0.000321	0.000763689	0.000242924
26	-1.22656e-05	5.25172e-05	0.000162076	0.000150683	0.000165343	0.000153074	0.000390153	0.000442071	0.000860272	0.00039347	0.000147026	0.000202713	0.000360201	0.000162514	0.000661022	0.00065737	0.000431848	0.000469445	0.00108265	0.000392068	0.000808061	0.000752181	0.00193546	0.000647268	0.000513484	0.000427865	0.00110972	0.000314025	0.000324378	0.000354943	0.000296962	0.000310064	0.000623998	0.000272571	0.000599107	0.000597126	0.00139786	0.000520369	0.000330255	0.000315289	0.000734961	0.00023827
27	-1.15396e-05	5.52856e-05	0.000163507	0.000156517	0.000169434	0.000153814	0.000388289	0.000438865	0.000862557	0.000389867	0.00015053	0.000199103	0.000357008	0.000160524	0.000674335	0.000631647	0.000438201	0.000452014	0.00110117	0.000393692	0.000795622	0.00075187	0.00192077	0.000646779	0.000472938	0.000421088	0.00106884	0.000309216	0.000331398	0.000343466	0.000300854	0.000304265	0.000635304	0.000273753	0.000591956	0.000595368	0.00139167	0.000518323	0.000311734	0.000310095	0.000712924	0.00023487
28	-1.04722e-05	5.78206e-05	0.00016564	0.000162609	0.000178044	0.000154521	0.000387285	0.000435589	0.0008647	0.000386719	0.000154234	0.000196359	0.000354187	0.000159842	0.000693335	0.000607416	0.000445322	0.000433963	0.0011238	0.000397373	0.000784327	0.000751546	0.00190383	0.000647551	0.000443339	0.000415233	0.00103718	0.000306257	0.000341431	0.000332618	0.000305481	0.000298286	0.000650921	0.000275947	0.000585806	0.000593567	0.00138426	0.000517135	0.000298787	0.000305796	0.000695684	0.00023305
29	-1.03079e-05	6.07024e-05	0.000168607	0.000168858	0.00018888	0.000156047	0.000387367	0.000432212	0.000869363	0.000384221	0.000157132	0.00019455	0.000349132	0.000159605	0.000711302	0.000585405	0.000453539	0.00041723	0.00115223	0.000405344	0.00077782	0.000751996	0.00189677	0.000649446	0.000425792	0.000411294	0.00101157	0.000304283	0.000350497	0.000323054	0.000311073	0.000293044	0.000670553	0.000280696	0.000582594	0.000592104	0.00138307	0.000516833	0.000291462	0.000302922	0.000680352	0.000231944
30	-1.1485e-05	6.39292e-05	0.000172164	0.000174308	0.000202863	0.000157356	0.000388805	0.000428334	0.00087401	0.000381816	0.000159221	0.000193248	0.00034211	0.000159269	0.000731726	0.000565304	0.00046385	0.000403029	0.00118558	0.000413196	0.000774086	0.000750515	0.00189071	0.000650424	0.000417918	0.000408104	0.000987291	0.000302548	0.000360121	0.000314616	0.000318007	0.000288668	0.00069422	0.000285276	0.000581445	0.000589425	0.00138236	0.00051612	0.000288569	0.000300676	0.0006647	0.000230908
31	-1.27261e-05	6.45843e-05	0.000175421	0.000178188	0.00021844	0.000157486	0.000390393	0.000423948	0.000874962	0.000379187	0.000160151	0.000191454	0.000336023	0.000158915	0.000759427	0.000546643	0.00047556	0.000392085	0.00122002	0.000417614	0.000770949	0.000747185	0.00188087	0.000649938	0.000413431	0.000403872	0.000965194	0.000301125	0.00037335	0.000305614	0.000325491	0.000285136	0.00071923	0.00028755	0.000580671	0.000585567	0.00137792	0.000514562	0.000286791	0.000297663	0.000650608	0.00023002
32	-1.4847e-05	6.2591e-05	0.000178714	0.000180655	0.000231287	0.00015698	0.000392223	0.000419839	0.000874529	0.0003765	0.000160133	0.000188622	0.000331688	0.000158465	0.000779664	0.00053277	0.000489301	0.000384742	0.00124959	0.00042074	0.000770134	0.000743696	0.00187809	0.000648919	0.000410864	0.000401751	0.00094697	0.000300004	0.000382409	0.000297681	0.000334007	0.000282698	0.00074044	0.00028886	0.000581179	0.000581767	0.00137631	0.00051271	0.000285499	0.000295187	0.000639329	0.000229234
33	-1.75498e-05	5.92229e-05	0.000181897	0.000182038	0.000243224	0.000154478	0.000395584	0.000415703	0.000874847	0.000373643	0.000160482	0.000184342	0.000328339	0.000157826	0.000800661	0.000519814	0.000501402	0.000377855	0.0012823	0.000420413	0.000775294	0.000737575	0.00188794	0.000646992	0.000409752	0.000404081	0.000932362	0.000298803	0.000391555	0.000289519	0.000341649	0.000279946	0.000762763	0.000287445	0.000585439	0.000576639	0.00138139	0.000510317	0.000285117	0.000294212	0.00063035	0.000228315
34	-2.18549e-05	5.60762e-05	0.000184429	0.000182749	0.000255728	0.000150426	0.000399538	0.000411443	0.000874131	0.000370236	0.000160618	0.000179271	0.000324327	0.000157271	0.000823203	0.00050901	0.000509702	0.000370084	0.00132174	0.000416938	0.000786085	0.000729039	0.00190806	0.00064331	0.00041081	0.000407753	0.000922075	0.000298015	0.000400674	0.000282543	0.000347065	0.000276416	0.000788732	0.000283682	0.000592811	0.000570241	0.0013911	0.000506773	0.000285714	0.000293512	0.000623201	0.000227643
35	-2.78093e-05	5.40108e-05	0.000186283	0.0001827	0.000266319	0.000145442	0.000402816	0.000406919	0.000871098	0.000366245	0.000160351	0.000173328	0.000321854	0.000156023	0.000844892	0.000502466	0.000517379	0.00036188	0.00135733	0.000411497	0.000798277	0.000718998	0.00193235	0.000638027	0.000413795	0.000410958	0.000917687	0.000296972	0.000408541	0.000278238	0.000351831	0.00027229	0.000811826	0.00027847	0.000600547	0.000562958	0.00140172	0.000502136	0.000287073	0.000292143	0.00061977	0.000226498
36	-3.27436e-05	5.27365e-05	0.000188381	0.000181677	0.000274941	0.00014003	0.000405751	0.000401649	0.000864989	0.000361982	0.000160607	0.000166712	0.000322255	0.000153681	0.00088335	0.00049877	0.000524672	0.00035506	0.00139449	0.000404709	0.000812953	0.00070676	0.00195903	0.000631632	0.000419849	0.000414555	0.000921265	0.000295707	0.000425303	0.000275753	0.000356526	0.000268369	0.000834716	0.000272369	0.000609352	0.000554204	0.00141201	0.000496807	0.000290228	0.000290634	0.00062176	0.000224694
37	-3.54139e-05	5.04884e-05	0.00019053	0.000179767	0.000281487	0.000134669	0.000408519	0.000395585	0.0008573	0.000357519	0.000161261	0.000160131	0.000322615	0.000150439	0.000931304	0.000492375	0.000536264	0.000350915	0.00144174	0.000396971	0.000832809	0.000693205	0.00199387	0.000623413	0.000427894	0.000419517	0.000926776	0.000294553	0.000447945	0.000271431	0.000363397	0.000265341	0.000861615	0.00026582	0.000620664	0.000544395	0.00142559	0.000490466	0.000294577	0.000289824	0.000624695	0.000222496
38	-3.76403e-05	4.74528e-05	0.000192202	0.000176963	0.000284802	0.000129959	0.000411244	0.00038922	0.000849671	0.000353264	0.000162249	0.000153475	0.000322034	0.000146508	0.000976191	0.000486985	0.000552713	0.000349707	0.00149571	0.000386716	0.000854662	0.000678354	0.00203457	0.000613213	0.000436274	0.000426079	0.000932551	0.000293259	0.000469275	0.000267219	0.000372457	0.000263335	0.000890255	0.000258337	0.000632953	0.000533787	0.00144212	0.000483238	0.000299261	0.000289777	0.000627293	0.000219883
39	-4.10386e-05	4.44959e-05	0.000193203	0.000173115	0.000285096	0.000125882	0.000413478	0.000383888	0.000841645	0.000349592	0.00016387	0.000146733	0.000321306	0.000142507	0.00102416	0.000490817	0.000575679	0.000353494	0.00156652	0.000375566	0.000876187	0.000663777	0.00207902	0.000602835	0.000444917	0.000434472	0.000945526	0.000293171	0.000491558	0.000267656	0.000384441	0.000263305	0.00092581	0.000250724	0.000644832	0.000523832	0.00146033	0.000476213	0.000304393	0.000290603	0.000633416	0.000217839
40	-4.4063e-05	4.17613e-05	0.000193289	0.000168841	0.000282612	0.00012273	0.00041556	0.000380321	0.000836796	0.000346785	0.000166038	0.000140297	0.000320802	0.000138804	0.00107264	0.000502356	0.000606173	0.000360869	0.00165431	0.000367194	0.000898856	0.000652163	0.00213343	0.000593942	0.000453935	0.00044563	0.000965255	0.000295357	0.000514287	0.000272059	0.000399731	0.000264855	0.000968459	0.000244962	0.000657208	0.000516242	0.00148511	0.000470364	0.000309986	0.000292963	0.000643028	0.00021708
41	-4.46118e-05	3.97615e-05	0.000194144	0.000165184	0.000277859	0.000121017	0.000419058	0.000378102	0.000838071	0.000344918	0.000169135	0.00013411	0.000321644	0.000135685	0.00111479	0.000517357	0.000642733	0.000367892	0.00175938	0.00036195	0.000924743	0.0006431	0.00220525	0.000586814	0.000465365	0.000459544	0.000988231	0.000300987	0.00053509	0.000278559	0.000418438	0.000266538	0.00101862	0.000241484	0.0006719	0.000510601	0.00152166	0.000465866	0.00031725	0.000296827	0.000654937	0.000218336
42	-4.46118e-05	3.97615e-05	0.000194144	0.000165184	0.000277859	0.000121017	0.000419058	0.000378102	0.000838071	0.000344918	0.000169135	0.00013411	0.000321644	0.000135685	0.00111479	0.000517357	0.000642733	0.000367892	0.00175938	0.00036195	0.000924743	0.0006431	0.00220525	0.000586814	0.000465365	0.000459544	0.000988231	0.000300987	0.00053509	0.000278559	0.000418438	0.000266538	0.00101862	0.000241484	0.0006719	0.000510601	0.00152166	0.000465866	0.00031725	0.000296827	0.000654937	0.000218336
43	-4.46118e-05	3.97615e-05	0.000194144	0.000165184	0.000277859	0.000121017	0.000419058	0.000378102	0.000838071	0.000344918	0.000169135	0.00013411	0.000321644	0.000135685	0.00111479	0.000517357	0.000642733	0.000367892	0.00175938	0.00036195	0.000924743	0.0006431	0.00220525	0.000586814	0.000465365	0.000459544	0.000988231	0.000300987	0.00053509	0.000278559	0.000418438	0.000266538	0.00101862	0.000241484	0.0006719	0.000510601	0.00152166	0.000465866	0.00031725	0.000296827	0.000654937	0.000218336
44	-4.46118e-05	3.97615e-05	0.000194144	0.000165184	0.000277859	0.000121017	0.000419058	0.000378102	0.000838071	0.000344918	0.000169135	0.00013411	0.000321644	0.000135685	0.00111479	0.000517357	0.000642733	0.000367892	0.00175938	0.00036195	0.000924743	0.0006431	0.00220525	0.000586814	0.000465365	0.000459544	0.000988231	0.000300987	0.00053509	0.000278559	0.000418438	0.000266538	0.00101862	0.000241484	0.0006719	0.000510601	0.00152166	0.000465866	0.00031725	0.000296827	0.000654937	0.000218336
45	-4.46118e-05	3.97615e-05	0.000194144	0.000165184	0.000277859	0.000121017	0.000419058	0.000378102	0.000838071	0.000344918	0.000169135	0.00013411	0.000321644	0.000135685	0.00111479	0.000517357	0.000642733	0.000367892	0.00175938	0.00036195	0.000924743	0.0006431	0.00220525	0.000586814	0.000465365	0.000459544	0.000988231	0.000300987	0.00053509	0.000278559	0.000418438	0.000266538	0.00101862	0.000241484	0.0006719	0.000510601	0.00152166	0.000465866	0.00031725	0.000296827	0.000654937	0.000218336
46	-4.46118e-05	3.97615e-05	0.000194144	0.000165184	0.000277859	0.000121017	0.000419058	0.000378102	0.000838071	0.000344918	0.000169135	0.00013411	0.000321644	0.000135685	0.00111479	0.000517357	0.000642733	0.000367892	0.00175938	0.00036195	0.000924743	0.0006431	0.00220525	0.000586814	0.000465365	0.000459544	0.000988231	0.000300987	0.00053509	0.000278559	0.000418438	0.000266538	0.00101862	0.000241484	0.0006719	0.000510601	0.00152166	0.000465866	0.00031725	0.000296827	0.000654937	0.000218336
47	-4.46118e-05	3.97615e-05	0.000194144	0.000165184	0.000277859	0.000121017	0.000419058	0.000378102	0.000838071	0.000344918	0.000169135	0.00013411	0.000321644	0.000135685	0.00111479	0.000517357	0.000642733	0.000367892	0.00175938	0.00036195	0.000924743	0.0006431	0.00220525	0.000586814	0.000465365	0.000459544	0.000988231	0.000300987	0.00053509	0.000278559	0.000418438	0.000266538	0.00101862	0.000241484	0.0006719	0.000510601	0.00152166	0.000465866	0.00031725	0.000296827	0.000654937	0.000218336
48	-4.46118e-05	3.97615e-05	0.000194144	0.000165184	0.000277859	0.000121017	0.000419058	0.000378102	0.000838071	0.000344918	0.000169135	0.00013411	0.000321644	0.000135685	0.00111479	0.000517357	0.000642733	0.000367892	0.00175938	0.00036195	0.000924743	0.0006431	0.00220525	0.000586814	0.000465365	0.000459544	0.000988231	0.000300987	0.00053509	0.000278559	0.000418438	0.000266538	0.00101862	0.000241484	0.0006719	0.000510601	0.00152166	0.000465866	0.00031725	0.000296827	0.000654937	0.000218336
49	-4.46118e-05	3.97615e-05	0.000194144	0.000165184	0.000277859	0.000121017	0.000419058	0.000378102	0.000838071	0.000344918	0.000169135	0.00013411	0.000321644	0.000135685	0.00111479	0.000517357	0.000642733	0.000367892	0.00175938	0.00036195	0.000924743	0.0006431	0.00220525	0.000586814	0.000465365	0.000459544	0.000988231	0.000300987	0.00053509	0.000278559	0.000418438	0.000266538	0.00101862	0.000241484	0.0006719	0.000510601	0.00152166	0.000465866	0.00031725	0.000296827	0.000654937	0.000218336
50	-4.46118e-05	3.97615e-05	0.000194144	0.000165184	0.000277859	0.000121017	0.000419058	0.000378102	0.000838071	0.000344918	0.000169135	0.00013411	0.000321644	0.000135685	0.00111479	0.000517357	0.000642733	0.000367892	0.00175938	0.00036195	0.000924743	0.0006431	0.00220525	0.000586814	0.000465365	0.000459544	0.000988231	0.000300987	0.00053509	0.000278559	0.000418438	0.000266538	0.00101862	0.000241484	0.0006719	0.000510601	0.00152166	0.000465866	0.00031725	0.000296827	0.000654937	0.000218336

## Sheet: Boxplot quantification 
# This table contains values related to the boxplots of expression-normalised crosslink coverage in the regions of 300nt upstream of stop codon and 300 nts downstrem of 3'UTR termini. Values shown here represent library-normalised crosslink signal (CPM) and expression-normalised crosslink signal (CPM per TPM) in genes sorted into DOWN, Control, and UP group, with respect to regulation by phosphor…
		Values	CPM														CPM per TPM
		Protein	LIN28A						PABPC1				PABPC4				LIN28A						PABPC1				PABPC4
		Condition	S200A_FCL		S200WT_2iL		S200WT_FCL		KO_FCL		S200WT_FCL		KO_FCL		S200WT_FCL		S200A_FCL		S200WT_2iL		S200WT_FCL		KO_FCL		S200WT_FCL		KO_FCL		S200WT_FCL
		Location in the 3'UTR	300nts downstream of stop codon	300nts upstream of 3'-termini	300nts downstream of stop codon	300nts upstream of 3'-termini	300nts downstream of stop codon	300nts upstream of 3'-termini	300nts downstream of stop codon	300nts upstream of 3'-termini	300nts downstream of stop codon	300nts upstream of 3'-termini	300nts downstream of stop codon	300nts upstream of 3'-termini	300nts downstream of stop codon	300nts upstream of 3'-termini	300nts downstream of stop codon	300nts upstream of 3'-termini	300nts downstream of stop codon	300nts upstream of 3'-termini	300nts downstream of stop codon	300nts upstream of 3'-termini	300nts downstream of stop codon	300nts upstream of 3'-termini	300nts downstream of stop codon	300nts upstream of 3'-termini	300nts downstream of stop codon	300nts upstream of 3'-termini	300nts downstream of stop codon	300nts upstream of 3'-termini
geneID	gene name	Gene Group
ENSMUSG00000000001	Gnai3	DOWN	28.2851	26.5173	24.3827	30.2663	14.9146	57.0121	10.3448	107.048	15.1735	128.832	4.4622	51.7214	3.7141	61.5797	5.61894	5.26776	3.42337	4.24943	8.29541	31.7098	1.45449	15.051	8.4394	71.6553	0.62739	7.27208	2.06576	34.2502
ENSMUSG00000000303	Cdh1	CONTROL	106.953	33.5886	256.177	119.104	80.1056	118.595	177.329	250.267	133.349	191.593	63.4855	87.6222	34.2439	81.71	1.44532	0.453903	1.52772	0.710279	1.06581	1.57791	2.55419	3.60476	1.77421	2.54916	0.914425	1.26208	0.455617	1.08716
ENSMUSG00000000346	Dazap2	CONTROL	8.8391	8.8391	16.3258	10.2301	6.7356	17.8012	5.7316	40.086	6.0758	43.2302	1.4198	12.474	1.9313	14.9307	0.764711	0.764711	0.763597	0.478487	0.829439	2.19209	0.510222	3.56842	0.748189	5.32348	0.126389	1.11043	0.237825	1.8386
ENSMUSG00000000628	Hk2	CONTROL	43.3116	16.7943	29.7363	17.704	11.5468	40.6542	34.4593	116.728	20.4858	74.5633	17.3419	54.561	9.3595	33.204	0.559412	0.216915	0.553105	0.3293	0.216699	0.76296	0.532132	1.80256	0.384458	1.39933	0.267799	0.842549	0.17565	0.623141
ENSMUSG00000000787	Ddx3x	CONTROL	60.9898	21.2139	54.172	29.2062	67.8372	90.209	100.722	143.324	79.3348	147.472	31.5399	44.3182	19.5361	22.8045	1.79391	0.623972	0.989676	0.533572	1.60987	2.14078	2.82778	4.02385	1.88272	3.49972	0.885488	1.24424	0.463618	0.541181
ENSMUSG00000001228	Uhrf1	DOWN	32.7047	23.8656	31.5385	24.9658	21.169	25.9802	101.176	91.4255	104.37	97.753	35.1908	24.3395	25.1073	22.2846	0.986616	0.719963	0.520897	0.412341	0.890815	1.09328	2.95312	2.66852	4.39198	4.11355	1.02715	0.710419	1.05654	0.93776
ENSMUSG00000001280	Sp1	CONTROL	7.0713	10.6069	12.6684	13.7815	8.9006	12.2684	5.6966	6.5004	6.1076	6.1712	4.2594	7.8089	4.9769	8.171	0.421255	0.63188	0.444811	0.483894	0.355345	0.489801	0.377767	0.43107	0.243838	0.246378	0.28246	0.517843	0.198697	0.326217
ENSMUSG00000001415	Smg5	CONTROL	13.2587	10.6069	10.2301	11.8733	2.4056	18.7635	6.7101	15.3774	6.6165	16.2551	3.6509	8.1132	3.6398	7.3539	1.188	0.950394	0.735134	0.853214	0.194988	1.52089	0.563927	1.29234	0.536305	1.31757	0.306827	0.681846	0.295027	0.596076
ENSMUSG00000001440	Kpnb1	DOWN	26.5173	36.2403	35.938	25.0188	35.3619	31.2725	86.358	28.9374	80.8617	23.3169	46.245	14.5023	26.2958	12.8508	1.13543	1.55175	1.22125	0.850192	2.64927	2.34289	2.67655	0.896875	6.05805	1.74687	1.4333	0.449479	1.97005	0.962764
ENSMUSG00000001482	Def8	CONTROL	7.0713	18.5621	8.64	18.499	3.6084	21.6502	1.8523	10.1001	2.513	14.6963	1.3184	6.9976	0.8914	10.1023	0.400838	1.0522	0.303693	0.650234	0.190995	1.14596	0.114087	0.622086	0.133015	0.777885	0.081203	0.430997	0.0471824	0.534722
ENSMUSG00000001525	Tubb5	CONTROL	53.0346	24.7495	58.9955	35.991	87.3223	56.7715	895.173	380.346	847.521	403.895	443.384	175.853	353.507	179.836	0.139	0.0648668	0.0817262	0.0498582	0.272927	0.17744	2.40146	1.02034	2.64894	1.26238	1.18946	0.471756	1.10489	0.562081
ENSMUSG00000001785	Pwp1	CONTROL	7.0713	7.0713	9.117	3.9224	4.8111	8.4195	10.7642	16.286	12.2788	16.7004	8.1132	10.8514	8.0224	9.4338	0.457435	0.457435	0.506678	0.217988	0.301641	0.527876	0.651594	0.985848	0.769842	1.04706	0.49112	0.656873	0.502979	0.591469
ENSMUSG00000001910	Nacc1	CONTROL	4.4196	11.4908	12.7744	9.011	8.6601	16.1173	13.4203	15.0628	11.4199	14.6645	6.9976	7.5047	4.754	6.5368	0.17009	0.442227	0.468538	0.330504	0.269187	0.500984	0.558032	0.62633	0.354972	0.455826	0.290969	0.312055	0.147772	0.203188
ENSMUSG00000002372	Ranbp3	CONTROL	4.4196	5.3035	3.1804	4.8765	3.3678	11.0656	4.788	11.8476	5.5668	11.6744	2.7382	6.8962	2.4513	6.6854	0.147269	0.176722	0.0940516	0.144209	0.148186	0.486897	0.178288	0.441162	0.244944	0.513685	0.101961	0.25679	0.10786	0.294164
ENSMUSG00000002741	Ykt6	CONTROL	61.8737	15.9104	46.6451	15.8487	14.674	19.2446	11.9874	17.4044	15.1417	19.6906	7.7075	10.2429	5.274	9.3595	3.76371	0.967811	2.51627	0.854957	1.02899	1.34949	0.706535	1.02581	1.06178	1.38077	0.454278	0.603714	0.369829	0.656317
ENSMUSG00000002748	Baz1b	CONTROL	10.6069	7.0713	12.2444	6.4667	3.1272	18.2824	1.7474	16.1812	2.0995	14.4101	0.8113	5.9835	1.1885	7.0568	0.602261	0.401509	0.54274	0.28664	0.154748	0.904695	0.107171	0.992424	0.103893	0.713076	0.0497586	0.366979	0.0588123	0.349202
ENSMUSG00000002948	Map2k7	DOWN	12.3747	15.9104	16.8029	34.6658	11.3062	71.4455	2.5862	27.6443	3.4037	36.1683	1.9269	13.3867	2.0056	15.4506	0.13763	0.176954	0.126188	0.260337	0.140782	0.889621	0.0184239	0.196936	0.042382	0.450358	0.0137271	0.0953661	0.0249732	0.192387
ENSMUSG00000002957	Ap2a2	CONTROL	4.4196	7.0713	5.8306	5.8306	6.7356	10.344	10.3448	17.8238	13.074	19.1816	6.3891	13.5895	6.6854	13.3707	0.537712	0.860332	1.3334	1.3334	0.745779	1.14531	1.3665	2.35444	1.44758	2.12382	0.84397	1.79511	0.74022	1.48043
ENSMUSG00000003119	Cdk12	CONTROL	6.1874	16.7943	7.7919	11.9793	5.2923	15.3957	6.0811	12.3019	6.3621	9.0023	3.8538	6.2877	2.377	7.5767	0.695977	1.88907	0.638489	0.981616	0.37653	1.09535	0.755188	1.52772	0.452643	0.640484	0.478588	0.780845	0.169116	0.539057
ENSMUSG00000003153	Slc2a3	CONTROL	53.0346	48.6151	78.4487	72.671	29.1074	121.722	34.7739	218.464	18.2909	113.722	18.2546	100.806	7.5767	49.9174	1.55512	1.42553	1.66509	1.54246	1.6555	6.92299	1.24295	7.80869	1.0403	6.46797	0.652486	3.60318	0.430928	2.83907
ENSMUSG00000003316	Glg1	CONTROL	11.4908	45.9634	32.3336	96.8417	35.843	54.1254	37.7794	6.8499	44.6934	9.0341	20.79	4.4622	13.3707	3.9369	0.572809	2.29125	2.0756	6.2166	1.60145	2.4183	2.00276	0.363127	1.99688	0.403639	1.10212	0.23655	0.597396	0.175899
ENSMUSG00000004044	Cavin1	UP	9.723	10.6069	2.8093	5.2476	1.9245	4.0895	6.78	22.9612	7.7299	22.3308	2.7382	7.7075	2.5999	9.2109	0.25237	0.275313	0.274663	0.513053	0.014135	0.0300363	0.49528	1.67732	0.0567741	0.164014	0.200026	0.563035	0.0190956	0.0676517
ENSMUSG00000004451	Ralb	CONTROL	6.1874	14.1426	7.4208	21.2023	1.2028	13.7118	3.6696	24.1844	5.1215	29.4563	1.6226	9.0259	1.4856	11.7365	1.00407	2.29502	0.260529	0.744368	0.160108	1.82521	0.620867	4.09181	0.681736	3.921	0.274531	1.52711	0.197752	1.56228
ENSMUSG00000004880	Lbr	DOWN	53.9186	24.7495	104.74	53.3239	62.7855	73.8511	197.04	109.005	176.07	107.614	47.1578	48.9832	42.4892	50.2888	2.87284	1.31868	2.26876	1.15505	4.45355	5.23847	9.60812	5.31531	12.4891	7.63338	2.29952	2.38853	3.01388	3.56713
ENSMUSG00000004897	Hdgf	DOWN	54.8025	129.935	53.0058	106.701	37.2864	101.756	55.1489	169.606	50.9601	150.94	23.0211	75.4524	15.8963	65.2937	0.311679	0.738981	0.271187	0.545901	0.33041	0.901699	0.2656	0.816831	0.451578	1.33754	0.110871	0.363383	0.140863	0.578593
ENSMUSG00000004934	Pias4	CONTROL	14.1426	14.1426	10.7602	16.5378	2.6461	9.6223	22.2972	14.1891	19.786	16.8594	16.4292	5.375	28.1528	9.4338	1.56231	1.56231	0.354104	0.544238	0.211841	0.770339	2.05562	1.30812	1.58402	1.34972	1.51464	0.495531	2.25385	0.755248
ENSMUSG00000005469	Prkaca	CONTROL	18.5621	7.9552	19.0291	10.6542	12.2684	10.1034	29.4966	26.6308	42.7212	34.7368	10.8514	15.9221	12.925	21.5417	1.21779	0.52191	1.10881	0.620814	0.833956	0.686788	2.6049	2.35182	2.90401	2.36127	0.958307	1.40611	0.878589	1.46432
ENSMUSG00000005470	Asf1b	DOWN	4.4196	6.1874	4.5055	5.0356	6.0139	8.9006	4.6132	18.2781	6.9665	26.6252	2.2311	8.9245	3.7884	14.7821	0.257503	0.360503	0.123623	0.138168	0.634856	0.93959	0.177474	0.703176	0.735417	2.81068	0.0858326	0.343334	0.399922	1.56047
ENSMUSG00000005506	Celf1	CONTROL	12.3747	16.7943	32.7576	23.2696	40.8947	41.6164	54.9741	106.383	58.7854	131.504	32.9597	54.7639	34.3925	51.923	0.587154	0.796855	0.752611	0.534623	1.96984	2.0046	2.47741	4.79418	2.83161	6.33434	1.48533	2.46794	1.65664	2.50105
ENSMUSG00000005667	Mthfd2	CONTROL	14.1426	7.0713	16.0608	11.3433	24.2963	26.9424	32.5371	55.9527	41.5124	61.4893	13.691	23.6296	13.8907	28.7471	0.296104	0.148052	0.456785	0.322614	0.283518	0.314396	0.506533	0.871064	0.484416	0.71753	0.21314	0.367862	0.162093	0.335455
ENSMUSG00000005698	Ctcf	CONTROL	9.723	31.8208	26.927	34.9309	13.4712	58.9365	21.2837	68.7089	29.4563	82.5159	8.7217	21.7027	10.1023	25.7758	0.0559018	0.182952	0.136186	0.176666	0.0539372	0.235975	0.146319	0.472352	0.11794	0.330385	0.0599589	0.149199	0.0404485	0.103204
ENSMUSG00000005813	Metap1	CONTROL	8.8391	11.4908	19.3471	15.6367	10.8251	17.5607	50.5357	65.2141	45.9022	57.9265	20.1815	22.4126	12.8508	27.2614	0.454495	0.590842	0.713424	0.576603	0.695682	1.12855	2.18678	2.82194	2.94993	3.72268	0.873292	0.969836	0.825865	1.75197
ENSMUSG00000006273	Atp6v1b2	DOWN	7.9552	24.7495	12.1913	29.2592	7.6978	38.7297	13.8746	47.6	18.4818	64.8293	7.9103	21.3985	7.5025	30.1584	0.192277	0.598194	0.157082	0.376998	0.292239	1.47033	0.215427	0.739073	0.701643	2.46118	0.122821	0.332249	0.284825	1.14493
ENSMUSG00000006373	Pgrmc1	DOWN	103.418	7.0713	176.774	17.5979	58.2149	50.7576	43.3712	37.9192	44.5344	36.5818	19.0659	14.4009	19.6104	12.7765	5.5752	0.381211	6.53087	0.650148	6.61547	5.76803	1.90626	1.66664	5.06083	4.15711	0.83799	0.632953	2.2285	1.45191
ENSMUSG00000006736	Tspan31	CONTROL	4.4196	6.1874	9.17	12.2444	5.7734	39.4514	36.2417	103.937	51.6917	147.441	15.0094	51.1129	13.8164	71.3849	0.390667	0.54693	0.255561	0.341242	0.708071	4.83847	3.47146	9.95576	6.33966	18.0827	1.4377	4.89592	1.6945	8.75491
ENSMUSG00000006930	Hap1	UP	8.8391	15.9104	11.0252	18.022	2.8867	7.6978	3.39	26.8755	7.7935	39.1584	2.4339	11.5613	2.3027	18.2733	1.12752	2.02954	1.36933	2.23833	0.177848	0.474257	0.435594	3.45333	0.480153	2.41252	0.312741	1.48555	0.141868	1.12581
ENSMUSG00000006932	Ctnnb1	CONTROL	90.1589	319.976	97.6898	266.036	41.1353	244.166	25.2329	97.0523	35.8184	114.835	14.2995	37.8276	11.7365	41.1521	0.670524	2.3797	0.472038	1.28549	0.323144	1.91808	0.181752	0.699064	0.281376	0.902103	0.102999	0.272471	0.0921977	0.323276
ENSMUSG00000007458	M6pr	DOWN	7.9552	22.9817	26.927	44.0479	27.183	67.5966	27.7841	78.2849	26.5934	77.0445	17.9504	41.4786	10.548	60.2426	0.503729	1.45522	1.06931	1.74921	4.31487	10.7299	1.27177	3.58335	4.22128	12.2296	0.821647	1.89861	1.67433	9.56256
ENSMUSG00000007670	Khsrp	DOWN	11.4908	15.9104	23.3756	24.8597	12.9901	52.9226	21.4235	168.208	22.1718	163.759	10.3443	114.091	7.651	134.599	0.470283	0.651163	0.8781	0.93385	0.871799	3.55177	0.729159	5.72503	1.48801	10.9903	0.352073	3.88316	0.513478	9.03326
ENSMUSG00000007815	Rhoa	CONTROL	7.0713	22.0978	16.5378	35.6199	12.9901	17.8012	50.7104	51.6191	69.0283	63.1434	20.1815	14.0966	13.965	14.2621	0.146133	0.456665	0.154232	0.332192	0.339127	0.464728	0.977129	0.994638	1.80209	1.64846	0.388873	0.271625	0.364578	0.372334
ENSMUSG00000007836	Hnrnpa0	CONTROL	81.3198	27.4012	94.3504	45.744	63.7477	48.1115	225.488	157.409	248.629	161.914	70.7874	64.9053	81.71	75.8418	0.814217	0.274355	0.521283	0.252734	0.794872	0.599904	2.55974	1.7869	3.10016	2.01891	0.803577	0.736804	1.01884	0.945674
ENSMUSG00000007880	Arid1a	CONTROL	5.3035	13.2587	14.3116	20.0892	14.674	36.0836	44.4546	143.464	30.188	91.709	41.9856	67.4407	27.6328	39.1465	0.559078	1.39769	0.712992	1.00083	1.67084	4.10863	4.66676	15.0606	3.43734	10.4424	4.40757	7.0798	3.14639	4.45739
ENSMUSG00000008475	Arpc5	CONTROL	13.2587	4.4196	13.0394	5.9897	11.3062	18.2824	9.0517	26.4211	11.9607	30.2834	6.1863	13.4881	5.6454	12.7765	0.913161	0.304389	0.507678	0.233204	0.820522	1.3268	0.559867	1.6342	0.86802	2.19775	0.382636	0.834268	0.409702	0.927225
ENSMUSG00000008604	Ubqln4	CONTROL	9.723	18.5621	4.7705	13.9935	2.6461	12.0279	7.2344	19.2916	7.3164	15.7461	5.2736	10.4457	3.4912	8.0224	0.525751	1.00371	0.271695	0.796975	0.164265	0.746668	0.52878	1.41007	0.454188	0.977487	0.385461	0.763502	0.216727	0.498015
ENSMUSG00000009291	Pttg1ip	UP	4.4196	11.4908	5.4596	18.552	4.0895	12.0279	1.9222	6.5004	2.5766	6.9983	1.3184	3.4481	2.0799	4.6055	0.298396	0.775819	0.567592	1.92871	0.183459	0.539583	0.178185	0.602578	0.115589	0.31395	0.122214	0.319634	0.0933062	0.206607
ENSMUSG00000009741	Ubp1	CONTROL	5.3035	4.4196	4.2405	4.0284	1.9245	9.1412	3.5997	13.4203	3.9127	12.6287	2.941	6.2877	2.377	4.5312	0.309075	0.257563	0.15727	0.149403	0.0958461	0.45526	0.220282	0.821248	0.194865	0.628948	0.179973	0.384772	0.118382	0.225668
ENSMUSG00000011884	Gltp	DOWN	13.2587	4.4196	7.6328	9.223	5.0517	5.7734	5.5219	30.7548	9.0023	36.9317	3.2453	20.6886	2.4513	22.4331	0.880701	0.293569	0.207819	0.251116	0.695833	0.795242	0.274532	1.52904	1.24	5.08706	0.161347	1.02857	0.337648	3.08999
ENSMUSG00000011960	Ccnt1	CONTROL	4.4196	7.0713	6.0957	16.5908	5.7734	28.3858	7.2693	27.7492	6.4575	30.0925	3.1439	13.1839	2.2285	14.0393	0.142755	0.228406	0.102661	0.279416	0.150218	0.73857	0.221914	0.847116	0.168018	0.782976	0.0959757	0.402473	0.0579833	0.365288
ENSMUSG00000012396	Nanog	DOWN	11.4908	11.4908	14.2586	11.5023	2.8867	5.7734	125.71	92.2294	36.0092	28.4384	45.8394	31.5399	11.3651	7.3539	0.255894	0.255894	0.126694	0.102203	0.433394	0.866789	2.7855	2.04363	5.40624	4.26959	1.01571	0.698864	1.7063	1.10408
ENSMUSG00000012405	Rpl15	CONTROL	4.4196	12.3747	19.8242	14.2056	5.7734	10.8251	14.958	19.3266	17.273	16.9867	7.8089	5.0707	6.6854	4.2341	0.00796903	0.0223129	0.0585692	0.0419695	0.00971304	0.0182119	0.0271632	0.0350964	0.0290597	0.028578	0.0141807	0.0092082	0.0112474	0.00712336
ENSMUSG00000012535	Tnpo3	DOWN	16.7943	19.446	25.2838	28.8352	15.3957	33.4375	71.0156	131.756	52.5188	130.009	72.7142	63.5869	85.3498	67.4479	0.267436	0.309663	0.291733	0.33271	0.289815	0.62944	1.05534	1.95799	0.988634	2.44733	1.08058	0.944945	1.60666	1.26966
ENSMUSG00000013033	Adgrl1	UP	6.1874	6.1874	7.1028	14.1526	3.1272	22.6124	2.062	27.0153	2.1631	25.1301	3.5495	20.2829	2.0056	24.5873	0.515061	0.515061	0.193545	0.385646	0.162869	1.17769	0.227653	2.9826	0.112658	1.30881	0.39188	2.23932	0.104455	1.28054
ENSMUSG00000013089	Etv5	CONTROL	14.1426	22.9817	10.3361	14.9476	6.7356	39.9325	5.4869	19.5363	3.8172	12.7559	3.9552	11.6627	2.0056	4.5312	0.550388	0.89438	0.51947	0.751234	0.199412	1.18223	0.184051	0.655322	0.113011	0.377646	0.132672	0.391211	0.0593771	0.134149
ENSMUSG00000013415	Igf2bp1	UP	22.0978	22.0978	16.4848	24.8067	12.509	36.0836	12.0223	40.9598	8.2389	32.5737	11.1556	33.8725	5.794	21.8389	0.545023	0.545023	0.540641	0.813569	0.219103	0.632028	0.330767	1.12692	0.14431	0.57055	0.306921	0.931926	0.101486	0.382523
ENSMUSG00000014668	Chfr	UP	5.3035	4.4196	2.2793	5.2476	3.1272	9.6223	3.8793	29.951	4.9624	40.5263	1.217	8.316	1.4114	10.028	0.643789	0.536492	0.149689	0.344628	0.182035	0.560117	0.526562	4.06544	0.288863	2.35905	0.165191	1.12878	0.0821581	0.583733
ENSMUSG00000014867	Surf4	CONTROL	26.5173	487.035	32.3866	293.122	18.2824	149.867	24.8834	24.8135	27.1024	30.8878	13.2853	14.8065	13.3707	17.7534	1.33338	24.4897	1.38179	12.5062	1.00705	8.25515	1.26847	1.2649	1.49288	1.7014	0.677238	0.754783	0.7365	0.977912
ENSMUSG00000014907	Naf1	CONTROL	241.308	15.9104	131.454	19.6652	41.3759	125.33	37.9891	33.0963	31.3967	29.5517	14.4009	16.9362	13.2222	16.9363	12.6259	0.832475	8.13347	1.21674	2.19309	6.64303	1.91402	1.6675	1.66416	1.56636	0.725565	0.853302	0.700831	0.897694
ENSMUSG00000015112	Slc25a13	UP	26.5173	6.1874	18.9231	9.9651	11.3062	30.0697	13.2455	41.6587	14.919	42.0532	6.1863	19.6744	4.8283	17.6048	0.427089	0.0996545	0.193656	0.101981	0.0998362	0.265522	0.305919	0.962154	0.131738	0.371339	0.142879	0.454402	0.042635	0.155454
ENSMUSG00000015749	Anp32e	DOWN	38.8921	28.2851	34.2948	37.6342	22.1313	27.183	112.22	59.4476	122.597	63.875	37.5234	25.1508	37.2152	28.1528	1.65575	1.20418	0.838936	0.920626	0.970154	1.1916	4.01769	2.12834	5.37419	2.80004	1.34341	0.900447	1.63138	1.23411
ENSMUSG00000016946	Kctd5	DOWN	16.7943	7.9552	16.3258	11.5553	9.1412	21.169	5.0675	104.147	5.535	111.272	3.7523	30.5258	3.417	33.724	1.98166	0.938681	1.39739	0.989062	3.93862	9.12097	0.375374	7.71466	2.38483	47.9433	0.277951	2.26119	1.47226	14.5305
ENSMUSG00000017428	Psmd11	DOWN	4.4196	8.8391	9.9651	8.905	18.5229	22.8529	77.4112	56.6517	77.967	64.8293	39.146	37.5234	43.3806	38.6266	0.0542634	0.108526	0.0811017	0.072474	0.455564	0.562059	0.665291	0.486879	1.91757	1.59445	0.33643	0.322485	1.06693	0.950008
ENSMUSG00000017561	Crlf3	CONTROL	30.9369	4.4196	27.245	15.1067	8.6601	38.7297	8.9119	84.4009	13.1695	85.2515	3.8538	32.4527	2.8227	38.1809	2.5308	0.361547	1.74977	0.970208	0.781543	3.49522	0.617918	5.85204	1.1885	7.69365	0.267208	2.25015	0.254739	3.44569
ENSMUSG00000018042	Cyb5r3	UP	6.1874	9.723	5.5126	9.011	4.0895	10.8251	6.2558	11.9175	8.9387	17.0821	4.158	8.9245	3.7141	13.0736	0.11247	0.176738	0.157944	0.258179	0.0464057	0.122838	0.184844	0.352134	0.101432	0.19384	0.122859	0.263698	0.0421459	0.148353
ENSMUSG00000018326	Ywhab	UP	14.1426	15.9104	17.0679	15.6367	11.7873	21.169	25.4775	47.3204	30.7923	56.7813	20.9928	16.8348	24.1416	21.7646	0.239473	0.269407	0.183842	0.168426	0.130283	0.233977	0.525736	0.97647	0.340341	0.627593	0.433193	0.347391	0.266833	0.24056
ENSMUSG00000018379	Srsf1	DOWN	217.442	7.0713	204.762	7.4208	117.873	15.8768	121.726	13.9095	150.654	16.8276	39.4503	4.6651	35.1353	6.7596	12.0874	0.393087	6.90888	0.250386	26.3273	3.54613	4.7642	0.5444	33.6489	3.7585	1.54403	0.182586	7.84758	1.50978
ENSMUSG00000018433	Nol11	CONTROL	30.053	4.4196	33.0756	2.8623	12.7495	5.2923	26.8405	6.8849	29.838	7.5072	9.0259	6.7948	9.8795	7.2053	1.67918	0.24694	1.24135	0.107424	0.662686	0.27508	1.33159	0.341568	1.5509	0.390205	0.447786	0.337098	0.513511	0.374513
ENSMUSG00000018547	Pip4k2b	DOWN	5.3035	4.4196	7.4208	4.0815	2.6461	13.4712	2.6561	21.6681	2.4812	22.4581	2.941	19.1674	2.0799	13.5193	0.945168	0.787643	0.656443	0.361049	0.74111	3.77296	0.424265	3.4611	0.694925	6.28998	0.469773	3.06165	0.582531	3.78644
ENSMUSG00000018593	Sparc	UP	11.4908	6.1874	24.9658	26.5559	6.9762	18.5229	18.9771	13.3853	17.1457	10.7837	13.1839	7.099	9.6566	7.9482	0.175096	0.0942832	0.228993	0.243578	0.0297376	0.0789579	0.344331	0.24287	0.0730873	0.0459679	0.239216	0.128808	0.0411634	0.0338809
ENSMUSG00000018666	Cbx1	DOWN	53.0346	11.4908	43.6768	14.4176	19.4851	31.9941	20.9342	128.821	22.14	139.106	7.4033	28.4975	5.8683	50.2145	0.254195	0.0550755	0.150988	0.0498406	0.160698	0.263863	0.093383	0.574641	0.182594	1.14724	0.0330245	0.127121	0.0483973	0.414131
ENSMUSG00000019961	Tmpo	DOWN	24.7495	11.4908	31.9095	20.9903	19.2446	19.4851	52.8423	48.6135	64.0659	45.5205	25.9621	25.2522	26.1472	28.0043	1.3355	0.620052	0.96681	0.635975	1.62499	1.6453	2.35603	2.16748	5.40965	3.8437	1.15755	1.12589	2.20784	2.36465
ENSMUSG00000019970	Sgk1	DOWN	20.3299	26.5173	11.2902	16.6968	2.165	14.4334	9.1565	306.779	1.7178	52.9641	6.4905	148.572	1.1885	25.7758	0.45417	0.592397	0.209249	0.309453	0.101555	0.677038	0.194036	6.50095	0.0805782	2.48443	0.13754	3.1484	0.0557499	1.20909
ENSMUSG00000019978	Epb41l2	DOWN	8.8391	6.1874	11.9263	6.6257	6.7356	12.0279	29.1471	28.1336	27.1024	24.7166	8.9245	15.3136	7.0568	13.5936	0.490295	0.343208	0.543722	0.302067	0.417128	0.744874	1.1893	1.14794	1.67842	1.53067	0.364149	0.624845	0.43702	0.841836
ENSMUSG00000020074	Ccar1	CONTROL	7.0713	5.3035	10.7072	2.7563	17.8012	1.9245	37.7095	6.5354	41.9578	6.1712	10.6485	2.7382	13.6679	4.3083	0.0856484	0.0642366	0.119422	0.0307422	0.213237	0.0230532	0.436731	0.0756894	0.502604	0.0739236	0.123325	0.0317123	0.163725	0.0516083
ENSMUSG00000020075	Ddx21	CONTROL	10.6069	4.4196	24.3827	16.9619	40.6542	78.4217	35.0534	79.9274	36.7727	76.6628	15.7193	51.8228	13.8164	45.3862	0.135383	0.0564102	0.391595	0.272414	0.396491	0.764829	0.463368	1.05655	0.358636	0.747675	0.207792	0.685042	0.134748	0.442641
ENSMUSG00000020088	Sar1a	CONTROL	10.6069	4.4196	8.799	10.6542	5.5328	14.674	6.116	9.2963	7.3482	10.1157	5.375	7.099	3.417	6.3882	0.844597	0.35192	0.945264	1.14457	0.408599	1.08368	0.383602	0.583073	0.542667	0.747048	0.337125	0.445257	0.252347	0.471771
ENSMUSG00000020091	Eif4ebp2	DOWN	11.4908	10.6069	17.0679	11.2372	13.2307	13.4712	6.9198	32.0479	8.9705	31.1423	7.4033	24.7452	5.274	22.5817	0.734027	0.677564	0.470316	0.309648	1.4733	1.50008	0.341332	1.58082	0.99891	3.46785	0.365182	1.2206	0.587286	2.51458
ENSMUSG00000020092	Pald1	CONTROL	13.2587	14.1426	14.4706	18.234	3.3678	11.0656	3.425	29.7762	2.9902	18.6408	1.9269	15.5164	0.8914	9.8052	1.81684	1.93796	0.504973	0.636302	0.555469	1.82511	0.476239	4.14031	0.493189	3.07452	0.267931	2.15752	0.147023	1.61722
ENSMUSG00000020108	Ddit4	CONTROL	16.7943	11.4908	19.9832	10.3361	4.8111	10.344	6.1859	22.1574	6.0758	17.5275	3.0424	8.0117	2.377	6.6111	0.628156	0.429789	0.889415	0.460041	0.299179	0.643243	0.359349	1.28716	0.377824	1.08995	0.176738	0.465412	0.147814	0.411112
ENSMUSG00000020152	Actr2	CONTROL	27.4012	8.8391	29.9483	9.8591	17.5607	26.7019	46.3069	84.7504	49.7513	80.6072	15.6178	22.7169	11.6623	23.9188	4.3074	1.38948	3.4891	1.14862	2.72098	4.13738	6.58432	12.0506	7.70882	12.4899	2.22067	3.23009	1.80704	3.70615
ENSMUSG00000020184	Mdm2	CONTROL	44.1955	28.2851	33.4467	20.7783	23.8152	49.7954	17.8587	30.1606	17.9728	28.6611	10.9528	11.7641	7.9482	12.9993	3.04147	1.94654	1.70089	1.05666	1.27858	2.6734	1.18754	2.00557	0.964918	1.53875	0.728322	0.78227	0.42672	0.697902
ENSMUSG00000020190	Mknk2	CONTROL	6.1874	7.0713	8.799	7.7919	3.6084	10.1034	10.6593	9.8905	14.6963	15.2053	5.7806	4.8679	4.3083	6.7596	0.612611	0.700125	0.255144	0.225941	0.367892	1.03008	0.800499	0.742763	1.49835	1.55024	0.434115	0.365573	0.439249	0.68917
ENSMUSG00000020198	Ap3d1	UP	7.0713	16.7943	7.9509	14.6826	10.5845	33.1969	3.1803	8.0731	4.4216	10.5928	2.0283	8.2146	2.9713	8.0967	0.327615	0.778084	0.259825	0.479808	0.246415	0.772849	0.183203	0.465057	0.102938	0.246608	0.116842	0.473208	0.0691741	0.188497
ENSMUSG00000020250	Txnrd1	CONTROL	4.4196	38.0082	7.5798	53.5359	6.9762	92.1335	8.2129	155.172	6.6802	136.721	6.1863	111.15	3.4912	90.1782	0.0866019	0.744769	0.109685	0.774703	0.0903838	1.19368	0.171211	3.23481	0.0865489	1.77136	0.128964	2.31711	0.0452321	1.16835
ENSMUSG00000020257	Wdr82	CONTROL	17.6782	15.9104	18.234	24.2767	14.9146	47.8709	3.0405	28.0987	4.2626	29.6154	2.5354	17.3419	3.2684	21.5417	2.71436	2.44293	1.69902	2.26207	3.12184	10.0201	0.501693	4.63638	0.892223	6.19893	0.418349	2.86147	0.684123	4.50899
ENSMUSG00000020315	Sptbn1	UP	12.3747	14.1426	31.5385	16.7498	27.4235	37.5269	139.27	60.7756	104.21	49.7831	35.6979	21.4999	23.6216	17.1591	1.01634	1.16154	2.27782	1.20973	1.22823	1.68074	15.349	6.69811	4.66735	2.22967	3.93428	2.36951	1.05796	0.768516
ENSMUSG00000020326	Ccng1	CONTROL	24.7495	21.2139	25.3368	25.9729	26.7019	51.9604	18.8722	34.3545	16.096	38.9676	19.0659	45.3323	12.7765	11.3651	2.4416	2.0928	1.38497	1.41974	2.89485	5.63321	2.0386	3.71101	1.74503	4.22462	2.05952	4.89685	1.38515	1.23213
ENSMUSG00000020328	Nudcd2	DOWN	45.0794	308.485	44.2069	221.724	38.4892	235.987	67.1013	111.94	63.1434	104.751	34.7852	48.5776	33.2783	51.2545	0.824982	5.64547	0.556997	2.79367	1.74686	10.7104	1.04655	1.74589	2.8658	4.7542	0.54253	0.757645	1.51036	2.32622
ENSMUSG00000020358	Hnrnpab	DOWN	1496.46	13.2587	848.041	20.2482	565.55	49.0737	196.865	67.6954	223.149	58.7854	74.4383	26.3678	61.3568	24.2159	11.3795	0.100823	3.95309	0.0943858	5.35446	0.464615	1.19503	0.410931	2.11271	0.556563	0.451863	0.16006	0.580908	0.229269
ENSMUSG00000020392	Cdkn2aipnl	CONTROL	7.9552	35.3564	12.9334	28.0401	12.2684	16.3579	14.1891	13.6649	17.5593	15.2689	6.1863	6.4905	6.6111	7.9482	0.391447	1.73976	0.656271	1.42282	0.589508	0.786013	0.619183	0.596308	0.843741	0.733685	0.269958	0.283232	0.31767	0.381919
ENSMUSG00000020402	Vdac1	DOWN	411.019	129.935	339.078	150.325	74.3322	166.947	135.671	97.8211	135.003	109.046	56.7921	47.2592	32.3126	42.3407	3.63802	1.15008	1.83986	0.815671	1.34744	3.02628	1.07725	0.776716	2.44723	1.97669	0.450939	0.375246	0.585738	0.767519
ENSMUSG00000020422	Tns3	DOWN	16.7943	6.1874	7.3678	8.0569	5.5328	27.4235	5.452	93.8719	1.9722	41.9578	10.5471	39.7545	2.5999	15.3021	3.12517	1.15138	1.29844	1.41988	2.33513	11.5742	0.784042	13.4995	0.832372	17.7084	1.51676	5.71702	1.09729	6.45829
ENSMUSG00000020483	Dynll2	CONTROL	61.8737	28.2851	99.386	45.8501	50.0359	52.2009	13.3154	54.6247	15.9688	59.2307	5.9835	25.1508	6.6854	28.0043	1.44533	0.660724	1.20843	0.557489	1.0017	1.04505	0.279061	1.14481	0.319691	1.18578	0.125401	0.527104	0.13384	0.560638
ENSMUSG00000020496	Rnf187	CONTROL	14.1426	22.0978	10.2301	17.4919	7.4573	18.7635	13.3853	31.2091	17.6865	29.7426	7.7075	15.5164	5.1997	15.7478	0.123562	0.193065	0.0947644	0.162033	0.0742055	0.18671	0.167298	0.39007	0.175993	0.29596	0.096333	0.193933	0.0517407	0.156702
ENSMUSG00000020523	Fam114a2	CONTROL	6.1874	7.9552	6.5197	7.8979	5.0517	11.5468	8.7721	11.3583	10.052	15.428	12.474	7.2004	18.4962	8.7653	0.347675	0.447009	0.268459	0.325209	0.268038	0.612661	0.432105	0.559499	0.533349	0.818594	0.614458	0.354685	0.98139	0.465078
ENSMUSG00000020577	Tspan13	CONTROL	7.0713	4.4196	9.435	4.9295	10.8251	9.6223	9.4711	10.17	11.8652	14.76	5.882	4.7665	6.3882	5.794	1.19083	0.744276	0.782264	0.408709	1.67457	1.4885	1.74701	1.87593	1.83546	2.28327	1.08498	0.879216	0.98821	0.896292
ENSMUSG00000020580	Rock2	UP	9.723	8.8391	14.0465	15.5307	14.4334	27.183	3.0405	14.7134	3.1174	14.4101	1.9269	6.9976	2.1542	7.2053	1.06255	0.965957	0.796988	0.881201	0.60378	1.13712	0.34474	1.66825	0.130408	0.602806	0.218477	0.793408	0.0901148	0.301413
ENSMUSG00000020611	Gna13	CONTROL	8.8391	5.3035	11.6083	9.5411	11.7873	22.3718	9.1565	16.2511	8.1434	20.3268	5.5778	12.9811	3.4912	11.8851	1.16885	0.701314	1.1913	0.979157	1.28671	2.44213	1.2064	2.14113	0.888941	2.21889	0.734893	1.7103	0.381103	1.29739
ENSMUSG00000020612	Prkar1a	CONTROL	8.8391	15.9104	10.0711	12.7214	16.1173	9.8629	38.758	12.9659	44.9479	17.2412	19.1674	9.2287	21.7646	13.5193	0.60468	1.08843	0.623652	0.787772	0.891794	0.545729	2.86422	0.958183	2.48703	0.953981	1.41648	0.682003	1.20427	0.748043
ENSMUSG00000020634	Ubxn2a	CONTROL	16.7943	15.0265	7.0498	14.7356	5.7734	8.9006	11.4981	10.1001	8.0162	8.5252	4.8679	6.5919	2.5256	4.6055	1.82431	1.63228	0.35392	0.73977	0.602835	0.929365	1.17694	1.03384	0.83702	0.890167	0.498277	0.674745	0.263713	0.480888
ENSMUSG00000020649	Rrm2	DOWN	30.053	11.4908	26.5029	9.6471	20.6879	40.1731	29.3568	117.427	33.5598	127.082	16.7334	46.0422	15.3763	51.9973	1.34861	0.515644	0.826442	0.300826	2.75079	5.34166	1.03928	4.15714	4.46231	16.8976	0.592393	1.62998	2.04452	6.91387
ENSMUSG00000020719	Ddx5	DOWN	53.0346	53.9186	74.0492	62.0168	166.947	84.1951	115.33	170.339	162.392	178.647	55.8794	68.7591	63.9567	65.5166	1.40911	1.4326	1.28583	1.07689	5.27618	2.6609	2.64071	3.90025	5.13222	5.64594	1.27947	1.57437	2.02129	2.07058
ENSMUSG00000020849	Ywhae	CONTROL	125.515	6.1874	191.404	8.693	183.064	23.0935	769.254	71.5747	874.496	85.2197	236.6	58.719	189.196	88.2468	0.208436	0.0102751	0.211134	0.00958909	0.243118	0.0306693	1.49909	0.139482	1.16137	0.113176	0.461077	0.114429	0.251261	0.117196
ENSMUSG00000020869	Lrrc59	CONTROL	45.9634	13.2587	32.7046	17.0149	19.4851	42.3381	14.8182	21.9128	15.6507	24.2394	6.9976	15.0094	4.9769	19.9818	1.37719	0.397268	0.864628	0.449832	0.406187	0.882582	0.507196	0.75003	0.326255	0.505295	0.239513	0.513741	0.103749	0.416541
ENSMUSG00000020899	Pfas	CONTROL	19.446	9.723	17.863	14.6296	11.3062	10.344	6.8499	34.3894	7.5708	32.3192	4.2594	17.6461	4.0855	16.6391	2.18908	1.09454	1.45418	1.19096	1.52171	1.39221	0.664323	3.33518	1.01896	4.34987	0.413089	1.71137	0.549871	2.23947
ENSMUSG00000020902	Ntn1	DOWN	35.3564	15.9104	8.852	9.7531	4.33	30.3102	8.0032	357.944	2.8947	125.173	5.2736	145.733	1.3371	57.5684	3.84996	1.73248	1.61318	1.77739	2.38768	16.7138	0.750699	33.5751	1.59621	69.0239	0.494663	13.6697	0.737312	31.7447
ENSMUSG00000020917	Acly	CONTROL	46.8473	16.7943	44.896	23.9056	24.0557	50.7576	21.3186	111.381	28.0885	122.978	11.3584	74.9454	10.1766	87.2069	1.58767	0.569162	0.706325	0.376094	0.732294	1.54514	0.717034	3.74622	0.855059	3.74366	0.382031	2.52073	0.309792	2.65472
ENSMUSG00000020922	Lsm12	CONTROL	27.4012	39.776	39.3303	46.8572	26.4613	30.0697	55.6382	247.436	68.5193	275.89	26.9763	58.3134	25.3301	58.7569	1.35691	1.96971	1.00416	1.19633	0.879417	0.999339	3.05964	13.6069	2.27718	9.16897	1.48347	3.20675	0.841822	1.95273
ENSMUSG00000020923	Ubtf	CONTROL	14.1426	7.9552	14.6826	11.5023	7.6978	3.8489	61.9988	59.6573	42.9121	36.4228	34.8866	25.9621	17.4562	20.5018	0.549033	0.30883	0.586625	0.45956	0.254091	0.127045	2.6284	2.52914	1.41645	1.20225	1.479	1.10065	0.576198	0.676728
ENSMUSG00000020925	Ccdc43	CONTROL	7.0713	12.3747	8.1099	12.9334	6.495	10.5845	7.5139	19.4314	10.2429	25.2255	2.5354	8.4174	2.3027	11.9594	0.720433	1.26075	0.474431	0.756607	0.628859	1.02481	0.876229	2.26598	0.991738	2.44238	0.295664	0.98159	0.222952	1.15793
ENSMUSG00000020935	Dcakd	CONTROL	7.9552	11.4908	7.9509	12.1383	5.2923	19.7257	15.7269	33.4109	15.3326	35.6911	9.7358	18.7617	5.8683	15.0049	0.137351	0.198395	0.0979703	0.149567	0.0720059	0.268384	0.302879	0.643448	0.208612	0.485606	0.187498	0.361325	0.0798428	0.204153
ENSMUSG00000020964	Sel1l	UP	7.0713	6.1874	19.7712	17.1739	8.6601	19.4851	2.7959	7.0247	3.8172	10.4974	1.6226	3.8538	3.5655	5.7197	2.44006	2.13506	5.40848	4.69798	1.42319	3.20216	1.22823	3.08592	0.627314	1.72513	0.712802	1.69296	0.58595	0.939968
ENSMUSG00000021127	Zfp36l1	DOWN	5.3035	11.4908	4.7175	4.5055	5.7734	12.2684	7.6887	78.2849	4.8352	43.7073	3.7523	42.4927	2.1542	29.3413	0.320393	0.694178	0.23065	0.220284	0.579183	1.23076	0.445063	4.53155	0.485064	4.38468	0.217203	2.4597	0.216108	2.9435
ENSMUSG00000021175	Cdca7l	CONTROL	13.2587	5.3035	9.117	2.5443	4.33	3.1272	2.691	4.4035	3.4673	4.4852	2.5354	1.9269	1.3371	1.857	1.43576	0.574308	0.665396	0.185694	0.550656	0.397693	0.428433	0.701079	0.440945	0.570393	0.40366	0.306781	0.170042	0.236159
ENSMUSG00000021255	Esrrb	DOWN	17.6782	17.6782	10.7072	14.6826	1.6839	18.2824	55.9877	134.342	20.6449	47.5564	27.0777	85.8981	8.171	28.7471	0.633136	0.633136	0.155149	0.212754	0.111846	1.21433	2.20427	5.28913	1.37125	3.15873	1.06606	3.38186	0.542723	1.9094
ENSMUSG00000021266	Wars	CONTROL	5.3035	76.9002	7.3148	45.267	3.1272	18.5229	5.1025	11.7427	6.8074	12.8195	2.6368	11.0542	2.8227	9.8052	0.908445	13.1724	1.50985	9.3436	0.445231	2.63717	0.736884	1.69584	0.969194	1.82516	0.380797	1.59641	0.401878	1.396
ENSMUSG00000021279	Cdc42bpb	CONTROL	6.1874	4.4196	5.5126	3.3924	3.6084	8.1789	6.5004	12.1621	5.8531	11.8016	4.158	5.9835	2.377	5.4226	0.561716	0.401228	0.199461	0.122746	0.496485	1.12535	0.583427	1.09158	0.805336	1.6238	0.373191	0.537034	0.327055	0.746103
ENSMUSG00000021474	Sfxn1	UP	6.1874	8.8391	12.1383	11.5023	8.1789	14.9146	12.4068	24.7786	14.6963	28.502	14.8065	25.2522	19.0904	28.0043	0.146341	0.209058	0.214681	0.203433	0.124893	0.227749	0.347794	0.694606	0.224416	0.435231	0.415063	0.707883	0.291514	0.427631
ENSMUSG00000021488	Nsd1	CONTROL	10.6069	7.9552	14.8946	14.3646	22.3718	32.2347	17.1598	21.5982	14.0601	16.5732	20.1815	22.2098	15.6735	18.719	0.559697	0.419774	0.496576	0.478906	0.849134	1.22349	0.983822	1.23829	0.533659	0.629045	1.15707	1.27335	0.594896	0.71049
ENSMUSG00000021546	Hnrnpk	CONTROL	57.4542	46.8473	64.4551	39.7014	36.0836	45.7059	152.9	139.375	179.315	148.204	50.3016	63.9926	34.6896	62.3225	0.454869	0.370893	0.298573	0.183907	0.347186	0.439769	1.32531	1.20807	1.72531	1.42598	0.436004	0.554675	0.333773	0.599649
ENSMUSG00000021577	Sdha	CONTROL	27.4012	23.8656	36.9451	20.8843	34.3997	20.2068	38.5483	8.7022	39.7947	10.7837	29.8159	5.6792	31.4955	5.0512	1.06167	0.92468	0.908439	0.513522	1.84984	1.08662	1.61541	0.364676	2.13995	0.579891	1.24947	0.237994	1.69366	0.271627
ENSMUSG00000021670	Hmgcr	CONTROL	24.7495	46.8473	47.0162	90.534	26.9424	152.032	8.1081	43.1266	10.1793	48.4789	4.2594	17.2405	3.7141	16.4906	1.90731	3.61027	1.95789	3.77009	1.30898	7.3864	0.496186	2.63919	0.494556	2.35532	0.26066	1.05506	0.180447	0.801187
ENSMUSG00000021678	F2rl1	CONTROL	6.1874	6.1874	10.1771	10.9192	7.2167	19.4851	12.896	73.1474	7.7935	34.2915	11.5613	42.7969	6.3882	22.8045	0.932848	0.932848	1.18591	1.27238	0.872688	2.35626	1.60029	9.07701	0.942438	4.14674	1.43466	5.31075	0.772501	2.75766
ENSMUSG00000021681	Aggf1	CONTROL	7.9552	23.8656	9.276	22.2625	6.9762	25.7396	3.2852	7.2344	4.6443	7.2846	1.8255	5.882	1.7085	4.9769	0.416899	1.2507	0.326156	0.782778	0.324101	1.19581	0.160096	0.352551	0.215765	0.338429	0.0889613	0.286645	0.0793736	0.231217
ENSMUSG00000021868	Ppif	DOWN	7.0713	12.3747	8.799	11.2902	5.0517	9.3817	6.0461	19.6062	6.9346	21.2175	4.0566	9.7358	2.7484	12.4794	0.373385	0.65342	0.206523	0.264994	0.552234	1.02557	0.206709	0.670313	0.758066	2.31942	0.13869	0.332855	0.300445	1.3642
ENSMUSG00000022010	Tsc22d1	CONTROL	35.3564	19.446	28.4641	14.7356	6.2545	17.3201	14.8532	83.2825	6.6802	30.6015	20.4857	45.0281	4.5312	14.7078	0.248938	0.136916	0.201591	0.104362	0.0495376	0.13718	0.0926278	0.519368	0.0529092	0.242373	0.127753	0.280805	0.0358885	0.11649
ENSMUSG00000022031	Elp3	DOWN	26.5173	49.499	23.3226	33.5527	12.2684	26.9424	7.6887	24.5339	9.4477	22.5535	5.6792	20.1815	2.7484	19.0162	1.10579	2.06414	3.04106	4.37497	0.947184	2.08009	0.26787	0.854747	0.729412	1.74125	0.19786	0.703112	0.212191	1.46815
ENSMUSG00000022035	Ccdc25	CONTROL	7.9552	8.8391	7.3678	7.4208	4.0895	10.1034	10.205	43.546	12.3424	43.1029	4.6651	13.7924	3.1941	15.0792	0.187612	0.208458	0.101499	0.102229	0.0952294	0.235271	0.191849	0.818643	0.287409	1.00371	0.0877016	0.25929	0.0743788	0.351139
ENSMUSG00000022125	Cln5	DOWN	7.9552	4.4196	17.0149	9.117	5.0517	16.1173	10.4147	39.2822	11.0382	34.7368	5.0707	31.1343	3.9369	42.1178	2.92422	1.62458	2.39977	1.28585	2.70616	8.63391	1.96084	7.39589	5.91308	18.6082	0.95469	5.86184	2.10897	22.5622
ENSMUSG00000022178	Ajuba	CONTROL	7.0713	4.4196	6.3077	6.2017	3.8489	14.1929	3.3551	15.9016	2.9265	10.3065	4.4622	8.8231	1.7085	3.8627	0.649021	0.405641	0.587913	0.578033	0.331601	1.22279	0.369281	1.75022	0.252132	0.887954	0.491134	0.971119	0.147195	0.33279
ENSMUSG00000022360	Atad2	CONTROL	19.446	16.7943	20.8843	19.3471	9.6223	20.2068	15.1677	27.9239	16.5413	36.2319	7.4033	12.9811	6.0168	21.096	1.92541	1.66285	1.28377	1.18927	0.8358	1.75518	1.44486	2.66	1.43679	3.14713	0.705229	1.23656	0.522624	1.83241
ENSMUSG00000022391	Rangap1	CONTROL	52.1507	13.2587	41.1855	11.3963	12.9901	23.3341	24.1495	31.4188	29.6472	33.369	13.3867	19.573	13.2965	19.6104	0.691947	0.175919	0.583646	0.161499	0.166585	0.299236	0.338103	0.439876	0.380195	0.427924	0.187419	0.27403	0.170514	0.251484
ENSMUSG00000022403	St13	CONTROL	44.1955	6.1874	38.6413	12.3504	28.6263	16.3579	134.517	65.4937	159.242	63.1434	41.4786	28.9031	41.1521	29.9356	0.404865	0.0566814	0.267983	0.0856519	0.19564	0.111795	1.43546	0.698894	1.08831	0.43154	0.442625	0.30843	0.281245	0.204588
ENSMUSG00000022434	Fam118a	CONTROL	5.3035	4.4196	2.8623	3.6044	1.9245	2.6461	3.7744	5.8364	4.867	8.6524	1.217	3.8538	1.9313	4.2341	0.268719	0.223933	0.190272	0.239603	0.074234	0.102068	0.261264	0.403996	0.187735	0.33375	0.0842408	0.26676	0.0744963	0.163322
ENSMUSG00000022443	Myh9	UP	26.5173	23.8656	23.7466	42.8287	7.4573	52.4415	8.842	142.555	11.2926	143.21	5.0707	55.9808	3.5655	55.86	2.40857	2.16771	0.724652	1.30696	0.298875	2.10176	1.06573	17.1822	0.452587	5.73959	0.611173	6.74738	0.142899	2.23877
ENSMUSG00000022451	Twf1	CONTROL	12.3747	8.8391	18.446	15.4777	14.4334	23.0935	27.0502	24.6388	24.8438	23.2215	12.1697	17.9504	10.3252	16.7877	2.39226	1.70877	1.00546	0.843663	2.34459	3.75136	4.83112	4.40045	4.03568	3.77215	2.17349	3.20591	1.67725	2.72703
ENSMUSG00000022463	Srebf2	CONTROL	17.6782	6.1874	44.8429	12.9864	24.5368	27.4235	18.8023	75.3142	22.808	76.631	9.8372	32.4527	8.6167	31.2727	0.412742	0.14446	0.598628	0.173361	0.462646	0.517075	0.393461	1.57604	0.430049	1.44489	0.205856	0.679113	0.162469	0.589653
ENSMUSG00000022464	Slc38a4	UP	9.723	4.4196	40.3905	20.6193	24.5368	47.1492	31.4537	68.4294	34.1324	73.1	13.3867	24.3395	15.3021	33.8725	6.40525	2.91151	2.15791	1.10161	1.38327	2.65806	11.0252	23.986	1.92423	4.12105	4.69233	8.53153	0.862663	1.90958
ENSMUSG00000022533	Atp13a3	CONTROL	10.6069	7.9552	28.0401	18.8171	36.0836	41.6164	7.0596	61.4047	8.7478	65.3383	6.6934	27.2805	6.314	26.6672	1.44818	1.08614	4.71429	3.16366	3.88683	4.4828	2.40948	20.9578	0.942289	7.03806	2.2845	9.31099	0.680127	2.87252
ENSMUSG00000022536	Glyr1	DOWN	10.6069	12.3747	11.5023	12.4564	6.495	20.9285	5.7665	61.7891	7.5708	71.8912	3.9552	40.1602	3.9369	45.0148	1.155	1.34749	0.692232	0.749651	1.38761	4.47122	0.407721	4.36881	1.61745	15.359	0.279653	2.83953	0.84109	9.61709
ENSMUSG00000022678	Nde1	DOWN	4.4196	9.723	3.8164	6.0957	2.165	12.0279	4.8579	29.3219	6.1076	32.3192	2.7382	23.0211	1.857	25.4787	0.295781	0.65071	0.152963	0.244318	0.158934	0.882976	0.251309	1.51688	0.448363	2.37257	0.141652	1.19093	0.136324	1.87041
ENSMUSG00000022682	Rrn3	CONTROL	24.7495	67.1772	22.7395	54.49	16.3579	61.3421	11.6728	40.1559	13.1376	34.8959	6.3891	20.1815	4.3826	13.7421	0.850295	2.30794	0.853162	2.04441	0.477069	1.78901	0.444518	1.5292	0.383151	1.01772	0.243307	0.768543	0.127816	0.400781
ENSMUSG00000022742	Cpox	DOWN	45.0794	6.1874	35.3019	7.1028	12.509	7.6978	4.5433	23.136	4.3898	23.476	0.9127	14.2995	1.1142	18.4219	1.18707	0.162932	0.872813	0.175611	0.694337	0.427282	0.0888027	0.452213	0.243665	1.30308	0.0178395	0.279496	0.0618459	1.02254
ENSMUSG00000022797	Tfrc	DOWN	16.7943	20.3299	31.6445	28.7822	23.8152	76.4972	17.9636	107.397	17.1139	86.3649	11.6627	136.098	8.8395	131.776	2.80859	3.39986	2.78352	2.53174	7.09139	22.7784	2.39535	14.3208	5.09596	25.7166	1.55516	18.148	2.63211	39.2386
ENSMUSG00000022822	Abcc5	DOWN	4.4196	7.0713	10.8132	8.0039	11.3062	8.6601	19.5363	11.568	20.2313	9.7339	7.8089	11.1556	6.1654	9.8052	0.822118	1.31538	2.1973	1.62644	3.56599	2.7314	2.742	1.62362	6.38097	3.07008	1.09601	1.56574	1.94457	3.09257
ENSMUSG00000022961	Son	CONTROL	7.0713	33.5886	17.6509	25.0718	18.0418	57.2526	17.9286	32.8866	21.2175	29.0428	8.9245	20.4857	7.8739	19.5361	0.263479	1.25152	0.335174	0.47609	0.653338	2.07326	0.61691	1.1316	0.768338	1.05171	0.307086	0.704898	0.285133	0.70745
ENSMUSG00000023022	Lima1	DOWN	23.8656	22.0978	16.3788	15.5307	6.9762	13.9523	15.3075	48.4038	9.893	29.5517	4.8679	14.0966	1.6342	16.342	1.16424	1.078	0.601536	0.570389	0.79828	1.59655	0.978157	3.09303	1.13205	3.38157	0.311061	0.90078	0.187	1.87
ENSMUSG00000023460	Rab12	CONTROL	6.1874	6.1874	13.3575	8.2159	6.0139	20.9285	3.5298	15.3774	5.5032	19.786	1.9269	7.2004	2.0056	7.5025	0.381189	0.381189	0.737938	0.453889	0.309341	1.07651	0.290275	1.26457	0.283072	1.01775	0.15846	0.59213	0.103163	0.385911
ENSMUSG00000023832	Acat2	UP	5.3035	6.1874	11.1312	11.9793	9.6223	24.5368	51.8637	12.4417	72.591	14.5055	20.5872	5.5778	17.3077	6.9082	0.13201	0.154011	0.0984723	0.105975	0.0905238	0.230835	1.61811	0.388172	0.682915	0.136463	0.642305	0.174023	0.162826	0.0649903
ENSMUSG00000024002	Brd4	CONTROL	8.8391	7.9552	6.5727	12.8274	2.8867	23.3341	3.1104	41.6587	4.6443	53.3776	3.6509	22.2098	2.897	21.4675	0.16804	0.151236	0.0997301	0.194635	0.0408493	0.330197	0.0671902	0.899903	0.0657208	0.755338	0.078866	0.479772	0.040995	0.303783
ENSMUSG00000024045	Akap8	CONTROL	25.6334	10.6069	27.7221	10.5482	10.8251	10.8251	48.8232	10.4846	38.3314	9.6067	17.7475	4.4622	13.2965	3.7141	1.98308	0.820583	1.8357	0.698479	0.830035	0.830035	4.65623	0.999909	2.93913	0.736612	1.69257	0.425557	1.01953	0.284786
ENSMUSG00000024165	Jpt2	CONTROL	13.2587	81.3198	21.0963	65.7803	14.674	37.7675	10.7991	27.1551	12.8195	35.0231	5.2736	13.691	3.5655	9.8795	1.09388	6.70912	1.2704	3.96122	1.49798	3.85546	1.04999	2.64028	1.30867	3.5753	0.512751	1.33117	0.363981	1.00854
ENSMUSG00000024222	Fkbp5	DOWN	16.7943	14.1426	23.2696	17.2799	10.5845	42.0975	13.8746	42.5324	13.1695	39.8583	7.9103	22.007	4.3826	19.239	1.06464	0.896543	0.887551	0.659092	1.09567	4.35778	0.612708	1.87825	1.36326	4.12599	0.349322	0.971838	0.453671	1.99155
ENSMUSG00000024359	Hspa9	DOWN	112.257	16.7943	119.581	20.9903	52.9226	74.0917	118.021	33.5856	113.594	40.4945	63.1813	20.1815	52.8144	24.2902	1.89971	0.284208	1.17324	0.20594	1.33069	1.86297	1.47085	0.418564	2.85624	1.0182	0.787403	0.251514	1.32797	0.610757
[truncated: 327 more rows]
