# Supplementary material for: Poised PABP-RNA hubs implement signal-dependent mRNA decay in development
Source: Research Square preprint supplement (doi:10.21203/rs.3.rs-3227673/v1), 2023-08-07
Supplement: Supplementary file 2 [file 58ad08b37cc29739c5cdbb33.xlsx]

## Sheet: mean_gene-level_TPMs_suplementa
Supplementary Table S4 | Table contains mean expression levels of genes in DOWN, Control, and UP group, with respect to regulation by phosphorylated LIN28A. First, expression levels of individual transcripts were obtained from 3'end sequencing data with Salmon as transcript-per-million (TPM). Next, expression levels for each gene were obtained by summing up TPM values of transcripts with the same…
Gene Group	geneID	KO_2iL	KO_FCL	S200A_2iL	S200A_FCL	S200WT_2iL	S200WT_FCL
DOWN	ENSMUSG00000000001	6.67795	7.11232	5.88097	5.03389	7.12243	1.79794
DOWN	ENSMUSG00000000028	10.6922	8.04546	9.77565	6.13384	13.348	3.32284
DOWN	ENSMUSG00000000078	11.855	7.37356	12.3859	5.77942	8.49338	4.68993
CONTROL	ENSMUSG00000000085	15.1766	33.3594	17.3819	31.7474	11.6465	28.1932
DOWN	ENSMUSG00000000088	755.807	438.856	792.873	403.82	736.102	173.541
UP	ENSMUSG00000000120	16.4211	6.77278	17.7253	9.08587	16.2987	26.876
DOWN	ENSMUSG00000000127	18.8972	12.5613	21.1562	8.62104	18.8457	10.5987
CONTROL	ENSMUSG00000000131	36.7175	36.5364	44.478	41.7102	46.4925	27.6278
CONTROL	ENSMUSG00000000134	17.4262	13.7017	22.7084	14.0792	14.2408	15.3054
DOWN	ENSMUSG00000000168	7.79706	6.04823	7.90185	4.54325	6.78672	3.03668
DOWN	ENSMUSG00000000171	5.33491	28.5776	7.22242	16.4495	9.46733	0.480309
UP	ENSMUSG00000000184	0.248894	0.665417	0.505031	2.2127	1.06676	9.66725
CONTROL	ENSMUSG00000000194	7.40125	5.14988	8.1878	6.00027	6.73788	8.43223
UP	ENSMUSG00000000202	0	0	0	1.07829	0.0586713	19.5621
UP	ENSMUSG00000000253	11.5577	12.3423	15.1706	13.8471	27.425	37.1316
CONTROL	ENSMUSG00000000275	5.54152	5.78275	7.08811	5.80856	8.36663	7.77462
CONTROL	ENSMUSG00000000278	45.7424	19.7199	59.0936	20.826	50.8366	27.8097
CONTROL	ENSMUSG00000000295	31.6731	33.5831	51.5276	43.3679	58.415	35.6395
CONTROL	ENSMUSG00000000296	3.87369	6.49448	4.77124	4.37236	6.70375	4.78533
UP	ENSMUSG00000000301	7.83035	13.8183	8.03088	15.5614	11.9974	34.4713
CONTROL	ENSMUSG00000000303	150.381	69.4267	173.718	73.9994	167.686	75.1594
CONTROL	ENSMUSG00000000308	6.93159	4.30704	1.17037	2.39216	7.2975	7.29894
CONTROL	ENSMUSG00000000326	11.6912	11.0725	15.6803	16.4672	21.4432	36.7712
CONTROL	ENSMUSG00000000339	29.5932	18.1552	26.0508	22.1859	27.3952	16.1217
CONTROL	ENSMUSG00000000340	9.5091	6.31819	10.6335	5.70268	13.3255	8.27949
CONTROL	ENSMUSG00000000346	22.1801	11.2335	26.0471	11.5588	21.3801	8.12067
CONTROL	ENSMUSG00000000355	64.3972	95.7434	72.6735	96.1343	70.7669	70.1561
CONTROL	ENSMUSG00000000365	12.1792	11.5226	16.9023	10.4453	17.389	6.25178
UP	ENSMUSG00000000378	6.99466	5.65796	8.4452	4.85533	8.80845	13.0336
CONTROL	ENSMUSG00000000384	89.0476	37.3132	92.7703	46.3902	75.9988	53.4704
CONTROL	ENSMUSG00000000399	13.9181	26.707	14.2872	29.1722	14.5747	28.7742
UP	ENSMUSG00000000420	14.8378	8.77552	16.5425	9.61606	20.0889	20.9859
DOWN	ENSMUSG00000000441	3.43102	9.76812	4.1148	7.71092	4.91479	1.64672
CONTROL	ENSMUSG00000000486	36.0457	44.0778	64.3089	56.4751	32.8564	60.9358
UP	ENSMUSG00000000552	8.32212	3.53849	10.213	4.93132	12.6688	17.3008
DOWN	ENSMUSG00000000561	29.5352	33.169	32.5566	25.6166	32.8895	13.6614
DOWN	ENSMUSG00000000563	114.849	77.2822	128.473	65.295	140.109	33.9619
CONTROL	ENSMUSG00000000568	131.169	90.9362	166.708	93.7838	160.546	97.7742
CONTROL	ENSMUSG00000000628	48.1238	64.757	59.3306	77.4234	53.7625	53.2849
UP	ENSMUSG00000000631	4.83589	2.36529	5.10418	4.16265	5.56301	11.4376
CONTROL	ENSMUSG00000000730	2.77448	74.5877	1.44578	50.5595	11.7598	90.748
CONTROL	ENSMUSG00000000738	61.0392	73.5533	76.2076	83.5083	75.7372	84.3635
CONTROL	ENSMUSG00000000751	9.90061	7.2235	11.5008	7.41371	14.0624	6.03848
DOWN	ENSMUSG00000000759	12.9289	9.82178	13.6596	6.3429	13.7871	3.45681
CONTROL	ENSMUSG00000000776	44.4821	41.0109	50.2826	41.8595	50.4549	62.0605
CONTROL	ENSMUSG00000000787	48.7945	35.6187	52.6862	33.9982	54.7371	42.1384
CONTROL	ENSMUSG00000000811	11.088	6.36558	10.1763	5.49664	15.8159	10.0751
UP	ENSMUSG00000000823	1.65953	2.03406	3.86289	4.19639	1.2546	6.94641
UP	ENSMUSG00000000826	10.4727	6.3457	11.5896	7.70009	11.728	13.8581
CONTROL	ENSMUSG00000000827	17.9048	16.2185	18.3384	17.1044	14.6917	15.81
CONTROL	ENSMUSG00000000838	10.082	5.12425	10.3311	5.14063	8.10414	4.32297
UP	ENSMUSG00000000876	7.08142	6.80904	9.54681	6.70357	9.98447	7.85156
CONTROL	ENSMUSG00000000901	57.3698	23.1213	65.0158	33.2189	39.7886	29.7757
CONTROL	ENSMUSG00000000902	106.397	53.3435	107.526	55.3718	106.096	45.2079
CONTROL	ENSMUSG00000000958	3.12679	5.5271	2.11712	4.82045	3.49942	5.33287
DOWN	ENSMUSG00000000959	16.9856	11.7407	18.0804	12.3018	17.0014	5.85743
CONTROL	ENSMUSG00000000976	15.7159	10.6998	18.7692	10.491	14.5963	20.7011
CONTROL	ENSMUSG00000001016	36.4927	22.7772	36.4673	20.3851	36.5635	25.6769
DOWN	ENSMUSG00000001034	22.8296	17.4405	23.8901	16.0098	32.0907	9.79248
CONTROL	ENSMUSG00000001036	21.8725	13.5843	18.1208	16.3721	15.0832	33.7763
CONTROL	ENSMUSG00000001039	29.831	48.8984	37.2345	57.6054	33.9531	52.6455
DOWN	ENSMUSG00000001053	28.676	24.7007	19.0422	25.735	18.8448	10.466
CONTROL	ENSMUSG00000001054	18.3075	15.6641	26.0736	14.9104	22.6352	13.065
CONTROL	ENSMUSG00000001056	138.992	122.666	131.447	130.036	138.869	169.493
DOWN	ENSMUSG00000001082	53.9419	77.364	45.4644	54.8581	30.9723	11.9302
CONTROL	ENSMUSG00000001089	13.3012	12.2724	14.8639	11.9709	19.2518	10.1558
CONTROL	ENSMUSG00000001100	11.4198	11.4175	15.1622	12.6889	8.36297	10.2862
CONTROL	ENSMUSG00000001105	38.9092	69.0983	51.3029	64.7393	44.9493	66.9469
CONTROL	ENSMUSG00000001131	34.6003	20.9995	39.7652	28.3706	19.9623	31.5447
CONTROL	ENSMUSG00000001134	59.7686	35.1997	59.827	28.269	55.7059	50.3949
UP	ENSMUSG00000001143	2.29877	2.37014	2.00014	2.46334	2.17034	5.24495
DOWN	ENSMUSG00000001157	18.3997	10.9999	21.1936	10.1576	16.7652	6.40823
CONTROL	ENSMUSG00000001175	122.492	132.495	131.709	104.224	145.963	73.5607
DOWN	ENSMUSG00000001228	59.4829	34.2608	73.9301	33.1484	60.5465	23.7636
CONTROL	ENSMUSG00000001248	2.72754	5.42144	4.54932	6.16637	2.44593	4.8495
UP	ENSMUSG00000001270	256.254	43.9055	192.287	21.0216	276.479	134.951
CONTROL	ENSMUSG00000001280	27.2116	15.0797	32.8301	16.7863	28.4804	25.0477
DOWN	ENSMUSG00000001281	1.86122	11.9407	1.36186	6.43933	1.06759	4.41579
CONTROL	ENSMUSG00000001285	13.62	21.669	17.1456	20.655	18.3788	33.6644
DOWN	ENSMUSG00000001288	10.0856	52.7546	7.34312	45.1939	2.802	41.1648
CONTROL	ENSMUSG00000001289	34.2163	41.2753	35.6789	41.5395	39.0379	47.6043
CONTROL	ENSMUSG00000001305	34.1778	39.7927	37.4131	32.5183	33.2797	43.7621
UP	ENSMUSG00000001313	35.5561	14.3162	34.1281	14.5276	41.2625	41.7097
CONTROL	ENSMUSG00000001366	8.94911	4.58269	10.4921	6.25389	8.15809	8.89267
DOWN	ENSMUSG00000001376	4.87314	5.31018	5.60698	3.05671	4.44205	1.82856
CONTROL	ENSMUSG00000001380	26.8178	21.6886	26.5051	16.4361	32.0911	12.5759
CONTROL	ENSMUSG00000001383	113.529	85.9961	120.494	82.6483	103.6	99.5014
DOWN	ENSMUSG00000001403	389.547	458.18	361.596	369.311	340.906	150.841
CONTROL	ENSMUSG00000001415	14.6751	11.8989	18.7522	11.1605	13.916	12.3372
CONTROL	ENSMUSG00000001418	5.39839	5.72603	6.07729	5.09121	4.76658	6.21424
UP	ENSMUSG00000001420	6.30891	3.06224	5.56794	4.10156	7.97442	7.84531
UP	ENSMUSG00000001424	26.8105	19.6661	29.34	21.6732	32.6041	32.0394
CONTROL	ENSMUSG00000001435	14.4192	5.3726	13.03	6.69	13.4074	7.33873
DOWN	ENSMUSG00000001436	8.9868	5.36569	10.5162	5.69747	8.15012	3.58293
DOWN	ENSMUSG00000001440	29.8075	32.2647	27.8371	23.3544	29.4272	13.3478
DOWN	ENSMUSG00000001445	33.2143	38.6359	27.8043	30.8851	37.3583	20.9323
UP	ENSMUSG00000001467	30.0634	24.2884	35.8028	22.8375	42.3336	39.827
CONTROL	ENSMUSG00000001472	3601.88	1623.87	2967.5	1158.76	2718.4	2240.94
CONTROL	ENSMUSG00000001473	22.3981	13.1446	25.1986	17.0974	38.5802	20.5966
CONTROL	ENSMUSG00000001482	36.9356	16.2359	37.1464	17.6413	28.4498	18.8926
CONTROL	ENSMUSG00000001517	11.5404	6.42866	16.3809	7.58048	12.9122	7.59065
CONTROL	ENSMUSG00000001518	13.5748	9.2722	16.275	8.41144	14.3749	9.4691
CONTROL	ENSMUSG00000001524	9.05236	9.97018	7.38039	8.89324	9.53616	11.4072
CONTROL	ENSMUSG00000001525	804.566	372.762	800.626	381.543	721.867	319.948
UP	ENSMUSG00000001576	11.7915	9.13413	18.3629	14.0797	15.3278	13.4205
DOWN	ENSMUSG00000001604	34.7211	81.424	24.1021	61.1062	30.0613	32.5958
CONTROL	ENSMUSG00000001627	45.4742	41.1873	39.5028	29.1734	57.2839	32.1828
DOWN	ENSMUSG00000001642	21.4023	77.4281	27.9113	59.1205	26.3623	10.8767
UP	ENSMUSG00000001663	0.049148	0.317934	4.2725	6.05643	18.9721	27.6068
UP	ENSMUSG00000001665	5.89376	3.44893	5.22893	3.73016	6.89058	7.31748
CONTROL	ENSMUSG00000001666	163.574	146.008	203.934	165.297	182.99	173.883
CONTROL	ENSMUSG00000001674	73.8474	94.4646	79.2745	87.4026	70.4229	54.7229
DOWN	ENSMUSG00000001687	8.53694	14.2086	6.87449	9.09871	9.87412	4.50727
DOWN	ENSMUSG00000001707	8.32018	8.11269	7.47888	5.56066	10.285	2.1308
CONTROL	ENSMUSG00000001729	3.21402	8.53686	6.11105	11.7551	5.39487	6.44112
UP	ENSMUSG00000001750	2.12021	3.22577	3.33946	5.52816	2.11163	12.3218
CONTROL	ENSMUSG00000001755	17.1261	15.139	25.1387	16.2546	16.4066	20.1376
UP	ENSMUSG00000001763	1.36668	0.769719	2.90741	1.82918	2.50504	6.32862
CONTROL	ENSMUSG00000001767	119.828	71.0682	110.088	79.1134	105.893	81.3889
CONTROL	ENSMUSG00000001783	42.6481	29.504	48.9681	31.4887	47.8028	23.0482
CONTROL	ENSMUSG00000001785	24.0084	16.5198	21.3719	15.4586	17.9937	15.9498
UP	ENSMUSG00000001794	59.6459	63.1913	77.5056	99.8985	42.4752	157.265
UP	ENSMUSG00000001829	7.86387	7.77879	7.46248	9.50195	8.86916	15.778
CONTROL	ENSMUSG00000001847	20.0103	17.6321	22.7251	17.026	24.6937	13.4244
CONTROL	ENSMUSG00000001855	75.3641	53.5192	95.1085	51.7366	54.176	44.1972
CONTROL	ENSMUSG00000001910	32.5556	24.0493	40.1265	25.984	27.2644	32.1713
CONTROL	ENSMUSG00000001918	46.0876	18.9365	39.0276	18.6345	32.7709	30.253
CONTROL	ENSMUSG00000001924	73.3462	56.1548	77.7809	57.4099	81.4234	76.4843
DOWN	ENSMUSG00000001946	0.646222	18.7514	0.807634	12.9355	0.290826	5.72087
CONTROL	ENSMUSG00000001962	42.6065	27.1117	48.0336	25.0064	41.0745	38.6356
DOWN	ENSMUSG00000001964	55.0115	42.7582	65.4803	48.0243	50.5731	22.0737
CONTROL	ENSMUSG00000002010	33.177	22.2707	36.8213	24.8432	35.6482	25.5185
CONTROL	ENSMUSG00000002015	73.5801	54.9001	85.3157	64.9545	65.2682	56.8661
UP	ENSMUSG00000002028	15.9534	8.40909	15.5956	8.18334	16.9834	15.4471
UP	ENSMUSG00000002031	3.55085	6.37058	3.60196	5.95586	3.75398	6.66437
UP	ENSMUSG00000002043	8.26764	11.0565	24.0425	23.5428	14.9082	35.7434
UP	ENSMUSG00000002052	9.98287	8.36331	12.538	10.1646	9.74993	16.9736
CONTROL	ENSMUSG00000002055	11.4145	9.6726	14.0754	11.2325	9.86968	7.74528
CONTROL	ENSMUSG00000002059	18.105	23.248	18.9602	27.3984	15.4776	26.4117
DOWN	ENSMUSG00000002064	20.9234	26.6866	29.3106	16.5609	28.4929	6.27866
DOWN	ENSMUSG00000002068	34.2398	52.6334	33.4078	50.3335	28.8716	24.8735
CONTROL	ENSMUSG00000002076	27.0633	42.0897	46.9574	45.7823	29.2723	18.8092
DOWN	ENSMUSG00000002083	63.4912	40.1545	53.1063	34.5863	49.8574	7.44345
CONTROL	ENSMUSG00000002129	22.1507	14.8251	28.3398	15.0929	26.8531	22.7024
CONTROL	ENSMUSG00000002205	2.0703	9.49582	1.89565	10.195	1.70568	12.3055
CONTROL	ENSMUSG00000002210	16.6325	11.2826	18.3073	13.8292	13.7037	22.4113
DOWN	ENSMUSG00000002227	42.887	10.2961	38.576	7.37342	26.4424	2.81437
CONTROL	ENSMUSG00000002228	14.3674	41.5184	13.7756	28.5206	15.0365	41.3113
UP	ENSMUSG00000002233	62.9741	38.001	89.1444	48.7039	94.1035	167.909
UP	ENSMUSG00000002250	13.019	4.4198	12.4189	3.35797	17.4087	11.0355
CONTROL	ENSMUSG00000002257	13.0758	13.088	14.1948	13.5463	14.487	16.0992
DOWN	ENSMUSG00000002265	7.15392	9.02621	10.1561	7.48732	4.56284	2.45729
UP	ENSMUSG00000002274	3.86259	4.13054	5.57791	4.64117	4.28057	9.9655
UP	ENSMUSG00000002279	3.38996	3.49977	7.39639	5.31316	7.92296	9.12673
DOWN	ENSMUSG00000002297	189.879	145.059	181.835	149.917	218.559	140.995
CONTROL	ENSMUSG00000002307	57.7389	29.9231	57.0256	26.9248	69.73	29.3563
CONTROL	ENSMUSG00000002308	9.73803	13.3639	11.3202	13.3562	9.08312	16.1581
CONTROL	ENSMUSG00000002319	12.9295	21.2762	14.1183	20.8405	15.8584	18.8004
CONTROL	ENSMUSG00000002325	9.93889	4.58175	12.8669	4.9024	10.7307	7.67494
CONTROL	ENSMUSG00000002329	8.92791	9.19917	9.65481	8.13584	9.13446	6.39738
CONTROL	ENSMUSG00000002332	66.9482	61.184	87.628	69.1761	95.4418	56.6241
CONTROL	ENSMUSG00000002342	21.7847	14.6742	21.4285	13.5275	13.3565	11.2696
DOWN	ENSMUSG00000002343	38.734	20.3902	28.4223	15.8966	24.8163	16.0017
CONTROL	ENSMUSG00000002345	33.0357	43.5495	36.8806	42.6397	26.6436	62.7779
CONTROL	ENSMUSG00000002372	28.8314	26.8554	37.5041	30.0105	33.8155	22.7268
CONTROL	ENSMUSG00000002379	104.74	301.716	123.989	325.989	115.63	354.894
UP	ENSMUSG00000002393	22.1785	36.313	33.843	51.4193	31.4801	75.9869
CONTROL	ENSMUSG00000002396	43.7526	18.764	35.0881	14.4884	55.2318	31.1263
CONTROL	ENSMUSG00000002458	30.5677	26.1938	34.1168	34.014	37.8052	27.1942
DOWN	ENSMUSG00000002477	361.151	231.123	443.476	253.435	375.694	133.876
CONTROL	ENSMUSG00000002486	6.99424	6.82298	6.69329	6.1973	6.28139	8.42388
UP	ENSMUSG00000002496	1.97709	7.75577	2.17197	7.74053	2.04516	5.13582
UP	ENSMUSG00000002546	24.8193	8.71315	24.4246	12.8587	17.4036	23.337
CONTROL	ENSMUSG00000002550	14.5529	9.20835	17.5025	11.8992	15.4555	14.6819
UP	ENSMUSG00000002603	1.09635	1.98827	0.551265	2.96401	2.6716	12.073
UP	ENSMUSG00000002608	12.4769	11.4808	14.8358	10.9862	13.3749	21.2124
UP	ENSMUSG00000002625	16.6128	12.0547	22.6643	17.5036	21.579	92.0691
DOWN	ENSMUSG00000002635	32.6599	27.5695	33.4478	17.8911	51.0867	5.45087
CONTROL	ENSMUSG00000002660	88.4214	72.1281	97.7002	75.4736	78.6193	70.2805
CONTROL	ENSMUSG00000002661	9.31588	20.8397	10.6517	21.4868	10.3591	20.0918
DOWN	ENSMUSG00000002679	16.7852	13.4684	14.9678	8.57728	17.5629	6.70228
DOWN	ENSMUSG00000002718	21.5921	21.1126	25.5828	17.6413	30.2445	8.84828
UP	ENSMUSG00000002731	3.14279	2.66556	6.21837	4.80362	5.08601	6.36073
CONTROL	ENSMUSG00000002741	17.5636	16.9665	18.9902	16.4396	18.5374	14.2606
CONTROL	ENSMUSG00000002748	21.8265	16.3047	24.8154	17.6118	22.5604	20.2084
UP	ENSMUSG00000002763	1.39721	1.84539	3.03884	2.36077	3.68464	5.73898
UP	ENSMUSG00000002768	80.1602	77.6748	80.0095	75.6636	86.7056	114.994
CONTROL	ENSMUSG00000002778	68.9694	36.2298	107.427	50.4796	65.4423	37.8193
CONTROL	ENSMUSG00000002797	13.7328	8.96949	12.3097	7.32571	16.109	8.11267
CONTROL	ENSMUSG00000002804	22.8212	23.7524	30.8606	25.5548	35.1283	36.7404
UP	ENSMUSG00000002812	26.0012	28.8682	31.2775	34.9395	37.5602	62.8497
CONTROL	ENSMUSG00000002833	118.108	116.649	158.094	121.402	118.372	167.724
CONTROL	ENSMUSG00000002844	9.59125	7.9628	21.4778	12.3493	11.5533	6.5538
CONTROL	ENSMUSG00000002846	17.2866	10.8118	15.3793	8.71869	17.5274	14.5896
DOWN	ENSMUSG00000002870	73.734	55.3643	86.7522	42.87	94.4057	21.6126
CONTROL	ENSMUSG00000002871	4.38095	6.46779	6.46972	7.18706	6.49384	4.4402
UP	ENSMUSG00000002881	0.535372	0.531658	0.998974	1.68928	1.31167	7.37427
UP	ENSMUSG00000002885	0.127001	0.229497	0.690006	2.01207	1.29741	8.96797
UP	ENSMUSG00000002900	6.06933	10.3259	6.68536	21.2494	19.2409	68.0143
DOWN	ENSMUSG00000002948	177.238	140.372	147.082	89.9126	133.157	80.31
CONTROL	ENSMUSG00000002957	5.32335	7.57029	5.66795	8.21927	4.37273	9.03163
CONTROL	ENSMUSG00000002963	4.33895	11.2052	4.7687	7.53619	2.82449	8.12322
UP	ENSMUSG00000002980	8.61518	10.472	9.34501	8.08324	29.7849	37.9637
UP	ENSMUSG00000002981	19.2462	13.1359	23.7894	14.0789	19.4326	24.8117
CONTROL	ENSMUSG00000002983	21.4462	13.9757	25.3647	18.132	25.8931	21.1445
DOWN	ENSMUSG00000002984	332.926	336.415	385.298	185.7	414.79	67.3116
DOWN	ENSMUSG00000002985	447.396	638.73	553.825	586.234	256.016	434.654
DOWN	ENSMUSG00000003032	144.332	72.4658	185.819	93.7198	121.254	34.5086
CONTROL	ENSMUSG00000003033	22.4356	25.4312	19.8123	25.1288	18.2598	36.7862
CONTROL	ENSMUSG00000003037	45.1484	27.9852	44.9561	27.908	35.9433	30.4887
CONTROL	ENSMUSG00000003038	388.113	316.958	399.854	278.294	412.973	286.172
CONTROL	ENSMUSG00000003039	33.7394	46.8783	32.7214	48.3002	20.3452	38.0988
CONTROL	ENSMUSG00000003068	7.22728	13.7252	10.8431	16.3062	11.0502	18.3231
CONTROL	ENSMUSG00000003119	11.3582	8.05243	13.5066	8.89024	12.2037	14.0555
CONTROL	ENSMUSG00000003153	62.0698	27.977	64.169	34.1031	47.1138	17.5823
UP	ENSMUSG00000003161	5.65173	3.44512	6.55966	4.24727	12.2733	7.03913
CONTROL	ENSMUSG00000003166	7.2128	6.27011	13.436	5.53124	8.85332	7.03812
UP	ENSMUSG00000003184	12.7175	16.9138	16.262	20.5345	13.4614	24.7257
UP	ENSMUSG00000003199	30.6134	30.4442	41.6985	50.6351	37.7681	78.8622
DOWN	ENSMUSG00000003200	13.3252	25.3951	17.928	20.4276	18.6787	10.3022
UP	ENSMUSG00000003235	185.818	91.309	249.345	107.572	190.074	172.434
CONTROL	ENSMUSG00000003269	6.0018	10.7276	6.21146	9.09753	7.34197	7.9667
CONTROL	ENSMUSG00000003299	91.9152	67.9778	97.6307	65.7762	94.2528	67.8209
CONTROL	ENSMUSG00000003308	53.8178	22.0334	77.0011	32.956	45.2674	41.5832
CONTROL	ENSMUSG00000003316	20.6033	18.8637	22.2494	20.0604	15.5779	22.3816
DOWN	ENSMUSG00000003345	18.4346	13.2551	24.077	11.3184	21.3932	10.2199
CONTROL	ENSMUSG00000003346	25.0974	33.2556	33.4298	27.3397	33.1702	28.0576
UP	ENSMUSG00000003348	2.30635	2.95941	3.26495	3.27055	2.84922	5.50187
UP	ENSMUSG00000003352	1.40662	1.59701	1.71628	2.41989	5.75478	12.7143
UP	ENSMUSG00000003363	3.26105	9.31691	6.6897	11.9928	5.67664	26.1806
CONTROL	ENSMUSG00000003380	39.7145	75.8643	38.8729	79.7283	20.6185	59.9188
UP	ENSMUSG00000003402	42.1707	34.466	57.754	53.2031	44.3269	84.685
CONTROL	ENSMUSG00000003421	43.1214	27.4053	47.9848	29.9069	41.3132	34.5251
CONTROL	ENSMUSG00000003437	7.70063	13.178	6.31863	9.81781	6.85335	8.24107
CONTROL	ENSMUSG00000003438	46.4527	34.9318	51.8514	41.5561	45.552	53.0922
CONTROL	ENSMUSG00000003444	15.5553	19.4184	18.6732	22.6625	12.5759	37.599
CONTROL	ENSMUSG00000003464	8.22553	6.28618	8.03471	5.22844	9.41202	5.27587
UP	ENSMUSG00000003500	21.9685	18.2345	36.8471	32.0952	32.0848	33.3299
CONTROL	ENSMUSG00000003526	6.90554	9.49439	6.43915	7.13659	12.0086	7.21016
CONTROL	ENSMUSG00000003528	15.1555	24.325	16.8456	25.5376	13.1318	36.9231
CONTROL	ENSMUSG00000003531	25.6404	19.9301	33.3087	20.4434	36.6176	16.2266
CONTROL	ENSMUSG00000003534	6.00646	4.25825	8.51337	6.33585	11.0299	6.58514
UP	ENSMUSG00000003541	11.5608	9.70302	11.4688	12.6988	11.3768	40.3435
CONTROL	ENSMUSG00000003546	14.54	8.22837	20.0385	9.2897	16.0611	12.3915
DOWN	ENSMUSG00000003657	15.8846	7.65205	13.5559	7.60545	13.4531	3.31759
CONTROL	ENSMUSG00000003660	9.59532	8.64997	10.2634	6.82164	10.5613	6.36118
DOWN	ENSMUSG00000003662	4.74709	5.08842	4.9706	3.5321	5.74286	3.21371
UP	ENSMUSG00000003762	4.51729	2.84147	7.14002	3.40653	4.01552	10.9916
CONTROL	ENSMUSG00000003778	133.064	97.646	157.387	105.124	119.067	176.181
DOWN	ENSMUSG00000003779	20.237	12.0353	20.0759	10.5379	21.4512	3.25424
UP	ENSMUSG00000003808	277.925	138.281	311.123	165.693	244.122	367.728
CONTROL	ENSMUSG00000003812	19.6088	15.4621	54.8586	26.1737	23.1057	27.5329
CONTROL	ENSMUSG00000003813	28.8722	23.0416	29.2119	21.0021	27.3567	19.8814
CONTROL	ENSMUSG00000003814	545.726	235.61	450.227	316.921	313.554	522.541
DOWN	ENSMUSG00000003824	31.1255	40.7413	36.69	34.0332	28.5507	17.1538
DOWN	ENSMUSG00000003848	76.2681	53.4675	79.2378	34.061	73.7162	12.2281
DOWN	ENSMUSG00000003849	75.3559	46.0677	72.4896	29.2877	55.6806	14.1585
UP	ENSMUSG00000003865	2.43634	1.83426	2.861	2.49866	3.25368	6.38742
DOWN	ENSMUSG00000003868	41.4436	36.0065	43.3904	24.9433	50.1002	11.6964
UP	ENSMUSG00000003872	1.68339	1.1379	5.56662	1.89199	3.15363	9.91846
CONTROL	ENSMUSG00000003873	48.8442	43.3661	57.5758	45.9272	44.9437	76.6956
DOWN	ENSMUSG00000003923	55.8889	27.0183	71.9546	25.0002	41.8127	28.5349
DOWN	ENSMUSG00000003955	89.2595	95.9627	81.2652	84.2733	123.443	55.9573
UP	ENSMUSG00000004032	8.7681	11.7581	20.1128	27.2261	29.8901	55.9433
UP	ENSMUSG00000004035	3.69503	2.3837	11.211	5.76422	10.6629	15.9533
CONTROL	ENSMUSG00000004040	14.2414	19.8564	16.7225	20.281	16.9664	18.2502
UP	ENSMUSG00000004044	7.16822	13.6892	13.2107	38.5267	10.2282	136.152
UP	ENSMUSG00000004056	18.7525	12.3092	26.6286	15.1901	23.7099	22.2015
DOWN	ENSMUSG00000004069	9.1018	8.59478	8.90182	6.15584	9.61593	2.75686
CONTROL	ENSMUSG00000004070	17.3292	17.2307	19.3014	14.9687	21.294	12.2904
CONTROL	ENSMUSG00000004071	5.58672	4.41632	9.12982	5.65702	4.43553	5.18406
CONTROL	ENSMUSG00000004096	174.687	110.722	189.857	127.534	175.412	183.277
CONTROL	ENSMUSG00000004099	64.2858	100.809	97.3144	88.4816	163.583	70.2357
CONTROL	ENSMUSG00000004100	55.2922	73.7913	56.62	88.4233	52.8872	77.4901
UP	ENSMUSG00000004127	90.7194	57.0461	109.756	68.0617	95.5769	164.716
CONTROL	ENSMUSG00000004263	3.9077	6.06089	7.34615	5.75575	7.42753	9.20663
DOWN	ENSMUSG00000004264	800.719	686.613	901.613	680.343	928.324	387.873
UP	ENSMUSG00000004266	16.9893	19.683	28.4592	41.1748	13.228	58.2879
DOWN	ENSMUSG00000004268	43.1357	85.8759	37.8119	53.4577	94.675	6.30623
UP	ENSMUSG00000004270	58.4672	16.6492	62.983	26.8592	61.3217	75.9628
UP	ENSMUSG00000004285	606.883	378.884	974.612	640.976	865.303	863.127
CONTROL	ENSMUSG00000004319	16.9224	10.2202	15.1056	9.82073	16.5664	14.2488
DOWN	ENSMUSG00000004364	28.6697	16.4944	38.2842	24.6316	28.3256	39.1438
CONTROL	ENSMUSG00000004393	18.4761	24.4506	20.1418	25.8395	18.2014	20.7193
DOWN	ENSMUSG00000004446	23.0404	34.9165	24.6343	23.2819	37.5534	9.76235
CONTROL	ENSMUSG00000004451	18.9936	5.91045	22.3549	6.16231	28.4836	7.51244
CONTROL	ENSMUSG00000004455	76.336	45.1964	85.0099	49.8763	98.2478	70.0398
CONTROL	ENSMUSG00000004530	27.6055	47.7476	22.7274	50.5939	22.306	53.6117
CONTROL	ENSMUSG00000004535	46.4377	33.4756	50.6284	31.4412	39.5543	30.8705
DOWN	ENSMUSG00000004562	35.9228	90.5297	23.7711	62.5216	56.7828	32.1454
CONTROL	ENSMUSG00000004565	12.3546	9.61305	8.9604	7.21477	10.8762	13.0555
UP	ENSMUSG00000004567	19.1786	15.7562	17.4311	13.7876	18.043	33.3413
CONTROL	ENSMUSG00000004591	107.807	47.6442	115.572	49.1172	106.74	73.7469
UP	ENSMUSG00000004626	15.464	19.9594	18.0406	20.3511	13.8127	37.7662
DOWN	ENSMUSG00000004642	26.8388	25.6656	24.6795	16.6896	33.7461	7.7382
UP	ENSMUSG00000004661	73.368	65.068	82.6932	62.9774	93.5685	105.7
CONTROL	ENSMUSG00000004665	2.53428	6.04417	1.38116	2.25566	9.30755	10.8218
CONTROL	ENSMUSG00000004667	323.359	311.726	324.257	331.406	283.325	292.64
CONTROL	ENSMUSG00000004748	4.93196	7.40425	3.78802	6.99496	4.10654	5.40987
CONTROL	ENSMUSG00000004771	48.2133	41.4804	55.4896	45.2997	67.2487	44.7129
CONTROL	ENSMUSG00000004788	32.2131	34.5968	31.0116	32.1133	27.6298	32.4419
CONTROL	ENSMUSG00000004789	19.2382	12.4464	20.2539	12.6333	24.6844	8.37888
CONTROL	ENSMUSG00000004843	21.5939	10.3881	28.2033	11.1274	18.0463	9.00511
UP	ENSMUSG00000004849	11.2455	19.2772	16.262	23.0004	9.46624	31.4606
CONTROL	ENSMUSG00000004865	25.7899	48.4925	30.6459	55.2722	24.2221	55.7106
DOWN	ENSMUSG00000004880	35.8612	20.5077	37.8775	18.7684	46.166	14.0978
DOWN	ENSMUSG00000004897	183.957	207.639	206.61	175.83	195.458	112.849
UP	ENSMUSG00000004929	19.521	15.2178	30.6752	20.5607	27.7989	41.7155
CONTROL	ENSMUSG00000004934	20.453	10.8469	25.6182	9.05236	30.3871	12.491
CONTROL	ENSMUSG00000004945	43.3338	29.1576	51.9587	35.2799	40.9673	35.3551
UP	ENSMUSG00000004947	3.70467	7.19282	8.25975	8.22764	7.88361	14.1936
CONTROL	ENSMUSG00000004951	2167.52	2861.18	4087.69	2948.19	1979.44	2533.52
UP	ENSMUSG00000004994	10.8048	4.71418	9.03649	5.03593	10.1251	12.7014
DOWN	ENSMUSG00000004996	13.8694	15.0678	12.2093	12.5774	5.60935	11.2395
CONTROL	ENSMUSG00000005054	98.8598	116.285	151.69	103.776	148.271	60.1429
CONTROL	ENSMUSG00000005078	14.1012	10.3552	17.2109	10.5345	18.7647	16.9285
CONTROL	ENSMUSG00000005103	19.7307	11.7248	22.0288	10.7676	22.413	11.3952
CONTROL	ENSMUSG00000005142	7.78322	7.11068	7.08043	5.70609	6.99252	5.62725
CONTROL	ENSMUSG00000005150	83.2472	77.8239	85.212	76.0081	66.3742	66.7445
DOWN	ENSMUSG00000005161	148.65	142.308	186.936	162.914	118.861	78.2595
CONTROL	ENSMUSG00000005198	11.5116	10.6236	12.0604	10.2421	12.4802	7.73404
CONTROL	ENSMUSG00000005204	7.32993	22.1054	8.1714	19.2622	7.80058	13.0277
CONTROL	ENSMUSG00000005233	74.8148	42.4067	78.2871	43.2137	74.7903	55.8115
CONTROL	ENSMUSG00000005262	21.3531	46.1756	22.7236	38.0781	20.1326	29.6353
CONTROL	ENSMUSG00000005299	7.28206	8.30338	8.92511	8.23876	7.92408	8.19239
CONTROL	ENSMUSG00000005354	1125.88	749.562	1334.52	977.498	1036.65	1963.25
CONTROL	ENSMUSG00000005371	12.3379	4.85034	15.4545	5.72402	7.69253	11.7475
DOWN	ENSMUSG00000005378	127.145	117.483	112.465	89.9623	136.189	73.2739
CONTROL	ENSMUSG00000005410	78.2772	56.889	76.4817	56.1951	67.1187	44.627
CONTROL	ENSMUSG00000005413	28.3667	20.5377	24.5813	13.7353	24.6389	38.7335
UP	ENSMUSG00000005417	10.5323	7.93681	14.7679	11.1962	13.0235	12.1831
UP	ENSMUSG00000005442	18.1258	14.1454	24.7505	15.9337	19.418	14.6225
CONTROL	ENSMUSG00000005469	12.0778	11.3235	13.8748	15.2425	17.1617	14.7111
DOWN	ENSMUSG00000005470	33.3956	25.9936	34.8309	17.1633	36.4456	9.47286
DOWN	ENSMUSG00000005481	115.836	134.118	88.1763	100.441	107.202	76.6526
CONTROL	ENSMUSG00000005483	34.192	22.1506	37.9224	24.7374	26.0709	29.326
CONTROL	ENSMUSG00000005501	5.12869	5.21288	7.74581	8.35347	4.20344	13.1685
CONTROL	ENSMUSG00000005506	37.2966	22.1901	41.5735	21.0757	43.5253	20.7604
UP	ENSMUSG00000005514	6.22975	9.06669	9.49849	11.1702	8.2749	14.9235
DOWN	ENSMUSG00000005566	738.586	1020.04	806.555	969.526	731.572	611.975
CONTROL	ENSMUSG00000005575	7.76825	27.045	10.2839	31.8772	9.34157	44.991
UP	ENSMUSG00000005609	83.9136	55.4338	89.3595	61.3622	81.1838	97.3038
CONTROL	ENSMUSG00000005615	4.17438	2.33302	2.99763	1.9699	3.77036	5.19312
UP	ENSMUSG00000005625	274.546	195.146	332.201	235.453	283.258	430.496
CONTROL	ENSMUSG00000005656	44.7576	32.7039	53.3948	26.3053	55.3934	25.9595
CONTROL	ENSMUSG00000005667	52.2366	64.2349	40.8841	47.7623	35.1606	85.6958
DOWN	ENSMUSG00000005674	9.3225	6.80834	14.4776	6.61206	7.79759	2.55289
DOWN	ENSMUSG00000005681	19.6748	46.9452	23.7992	49.1756	11.4913	15.4745
DOWN	ENSMUSG00000005687	73.4275	74.5996	77.3945	68.5925	76.0414	56.5523
CONTROL	ENSMUSG00000005698	205.473	145.461	221.295	173.93	197.723	249.757
DOWN	ENSMUSG00000005718	11.5173	8.19817	14.6034	8.47114	9.92999	3.72259
CONTROL	ENSMUSG00000005779	271.7	280.828	299.238	292.145	276.481	214.854
CONTROL	ENSMUSG00000005804	8.38495	3.45964	8.18919	4.23615	6.02321	6.50053
CONTROL	ENSMUSG00000005813	23.2197	23.1097	22.6485	19.4482	27.1187	15.5604
DOWN	ENSMUSG00000005846	250.887	170.356	271.158	131.532	291.865	85.4491
UP	ENSMUSG00000005873	1.78801	1.17908	3.3309	2.61797	4.75833	7.95458
UP	ENSMUSG00000005881	112.678	116.974	133.347	131.14	121.847	250.099
CONTROL	ENSMUSG00000005882	13.6923	9.00211	14.2331	10.0563	13.1527	8.51698
DOWN	ENSMUSG00000005892	218.479	82.9946	244.437	113.764	124.946	44.6948
DOWN	ENSMUSG00000005899	8.10325	5.87766	8.65186	4.69696	7.50569	3.39577
UP	ENSMUSG00000005958	4.0372	5.88708	4.7209	7.56229	2.71935	11.5389
CONTROL	ENSMUSG00000005973	12.5372	5.22249	16.9296	8.24384	8.69022	5.27999
CONTROL	ENSMUSG00000005981	22.2389	19.4316	23.0851	20.3545	24.1983	20.6591
CONTROL	ENSMUSG00000005982	11.6892	7.97665	11.8317	7.87552	10.5549	11.7185
CONTROL	ENSMUSG00000006005	139.828	117.927	148.301	129.078	122.031	93.7021
UP	ENSMUSG00000006019	2.39695	4.01539	3.09477	4.79987	2.12976	12.8491
UP	ENSMUSG00000006021	13.5987	6.00243	17.5584	8.47692	16.0307	20.2091
CONTROL	ENSMUSG00000006024	14.8309	18.7673	17.3809	23.1271	12.5128	21.3501
CONTROL	ENSMUSG00000006057	30.672	84.4307	32.7724	81.7201	24.9454	50.3393
DOWN	ENSMUSG00000006058	87.8427	131.899	87.6764	107.364	96.2548	82.0415
CONTROL	ENSMUSG00000006095	68.8505	167.372	62.6526	157.011	74.8988	183.844
CONTROL	ENSMUSG00000006169	15.4936	11.139	18.3902	13.4807	15.0586	14.3216
CONTROL	ENSMUSG00000006191	11.1644	6.74483	11.7101	6.17468	9.65359	9.86167
CONTROL	ENSMUSG00000006215	7.24153	6.3692	11.0823	7.257	10.3747	8.56335
DOWN	ENSMUSG00000006273	77.9411	64.405	71.2066	41.3737	77.6111	26.3407
DOWN	ENSMUSG00000006276	11.9794	14.1127	12.1126	11.1165	13.328	8.72584
CONTROL	ENSMUSG00000006289	9.95169	10.9943	10.6808	10.2542	12.8801	9.21799
DOWN	ENSMUSG00000006299	256.655	159.918	352.205	161.709	318.423	115.229
UP	ENSMUSG00000006304	72.2749	56.2087	86.0365	64.2711	79.9666	120.957
UP	ENSMUSG00000006356	16.4276	38.2392	15.9982	46.1475	17.2115	93.5709
CONTROL	ENSMUSG00000006360	4.47405	42.1332	1.57542	25.2247	3.2208	36.1657
DOWN	ENSMUSG00000006373	29.3568	22.7519	30.172	18.5496	27.0675	8.79982
UP	ENSMUSG00000006378	20.9073	28.9367	34.9927	39.4101	25.3273	56.9453
UP	ENSMUSG00000006390	3.6377	5.86146	5.21167	8.62702	5.16757	28.1851
CONTROL	ENSMUSG00000006392	29.735	22.3412	30.9653	20.7296	28.8985	22.5551
CONTROL	ENSMUSG00000006412	85.3624	53.6752	91.6181	48.3263	101.094	36.9842
UP	ENSMUSG00000006435	3.87134	3.79601	4.83646	3.54846	5.29557	15.2676
CONTROL	ENSMUSG00000006442	239.393	287.998	270.025	316.947	230.955	404.879
CONTROL	ENSMUSG00000006456	28.3824	15.4498	28.0016	20.1415	27.5284	13.0336
UP	ENSMUSG00000006476	0	0.451733	1.02941	1.88444	0.705251	12.4902
DOWN	ENSMUSG00000006494	5.83496	11.8757	6.59434	10.2906	8.80159	5.84189
CONTROL	ENSMUSG00000006498	59.0048	56.928	59.9122	50.209	67.2468	48.7089
UP	ENSMUSG00000006517	187.682	140.652	219.1	154.715	383.618	784.044
UP	ENSMUSG00000006519	6.16993	10.3199	16.3031	30.9431	23.1708	78.0342
CONTROL	ENSMUSG00000006575	11.9398	7.67997	5.01741	8.75745	3.58928	7.18758
UP	ENSMUSG00000006576	0.241016	0.546996	0.0121854	1.16684	0.15122	10.3377
DOWN	ENSMUSG00000006585	214.563	104.148	188.19	90.0039	166.467	51.4725
UP	ENSMUSG00000006587	0.925527	6.89817	0.172777	10.4132	1.00785	32.0339
UP	ENSMUSG00000006589	353.887	351.276	364.034	385.316	262.559	670.456
DOWN	ENSMUSG00000006599	13.5511	15.7831	16.071	12.7792	13.0518	5.56784
CONTROL	ENSMUSG00000006673	7.51514	4.8311	8.02948	4.91583	8.26228	6.10436
DOWN	ENSMUSG00000006676	23.2735	21.1594	26.0612	18.1109	21.0606	14.686
DOWN	ENSMUSG00000006715	37.4539	41.099	39.9594	31.0596	44.7812	8.32627
CONTROL	ENSMUSG00000006732	33.6853	34.1452	35.9923	38.9963	29.2537	75.9979
CONTROL	ENSMUSG00000006736	25.1368	10.4399	29.7667	11.313	35.8819	8.1537
UP	ENSMUSG00000006782	2.68141	3.48312	3.99668	3.77551	5.60315	7.01714
DOWN	ENSMUSG00000006800	12.8263	8.92255	15.2756	9.32138	15.6228	4.38451
DOWN	ENSMUSG00000006818	118.701	63.7388	123.644	42.1973	80.7316	11.5343
UP	ENSMUSG00000006930	6.34628	7.78248	5.22894	7.83941	8.05155	16.2313
UP	ENSMUSG00000006931	0.924852	1.79639	1.80097	2.89695	3.22383	6.11533
CONTROL	ENSMUSG00000006932	170.829	138.832	180.262	134.46	206.953	127.297
CONTROL	ENSMUSG00000006941	50.6877	49.5429	49.463	42.6054	85.633	57.1324
CONTROL	ENSMUSG00000006998	337.508	243.524	418.937	249.86	387.065	183.141
DOWN	ENSMUSG00000007036	13.1525	9.6045	19.0625	6.64187	21.3012	3.84461
CONTROL	ENSMUSG00000007039	111.846	32.8628	130.589	46.5956	130.326	32.815
UP	ENSMUSG00000007041	21.0965	9.5395	33.1926	18.733	22.9249	50.6833
CONTROL	ENSMUSG00000007050	86.117	62.3432	111.926	56.9626	92.0345	43.0695
CONTROL	ENSMUSG00000007080	9.6144	6.2218	9.40058	6.842	7.79635	4.531
CONTROL	ENSMUSG00000007338	30.611	25.24	34.7178	26.2439	29.0572	23.0154
UP	ENSMUSG00000007411	22.6087	9.19983	26.9856	10.3526	20.7305	21.4942
CONTROL	ENSMUSG00000007415	35.4878	20.8757	47.6171	21.9598	43.8915	23.7333
DOWN	ENSMUSG00000007458	22.0158	21.8469	23.708	15.7926	25.1816	6.29984
CONTROL	ENSMUSG00000007564	91.1979	52.7844	102.333	49.4177	100.626	34.5371
CONTROL	ENSMUSG00000007570	49.242	32.6975	45.2904	33.4415	51.8331	28.3476
DOWN	ENSMUSG00000007610	26.8042	18.8168	21.7687	17.5718	25.065	14.3829
UP	ENSMUSG00000007659	4.9724	10.3572	6.89848	10.3409	8.31901	36.9562
DOWN	ENSMUSG00000007670	25.4848	29.3811	24.3925	24.4338	26.6207	14.9003
CONTROL	ENSMUSG00000007721	14.3849	46.311	13.538	48.3011	7.29067	58.6964
DOWN	ENSMUSG00000007739	49.53	44.5475	46.2566	35.4662	56.1213	15.5096
DOWN	ENSMUSG00000007777	4.57859	6.4305	4.86339	5.09298	7.8487	1.11563
UP	ENSMUSG00000007783	2.2189	2.91862	3.34508	3.59936	3.07596	7.39367
CONTROL	ENSMUSG00000007815	97.5605	51.8974	110.579	48.3895	107.227	38.3045
UP	ENSMUSG00000007827	4.45378	2.92713	5.67445	3.74011	4.17292	5.39642
CONTROL	ENSMUSG00000007833	12.3412	12.1452	10.1444	14.577	9.44723	21.3256
CONTROL	ENSMUSG00000007836	126.612	88.0904	154.126	99.8749	180.996	80.1987
CONTROL	ENSMUSG00000007837	15.0996	8.25885	29.4656	11.7992	26.3964	8.2611
CONTROL	ENSMUSG00000007867	15.0008	11.6289	10.5673	10.0707	22.2353	17.8777
DOWN	ENSMUSG00000007872	53.7671	181.559	111.101	144.735	125.134	10.4936
CONTROL	ENSMUSG00000007880	16.1288	9.52579	18.8978	9.48616	20.0726	8.78238
UP	ENSMUSG00000007888	1.56712	1.4463	1.19185	1.24396	2.72482	9.17946
DOWN	ENSMUSG00000008035	7.26474	8.00791	2.4096	3.61198	5.25296	1.18515
UP	ENSMUSG00000008036	84.3211	83.9973	130.601	103.048	105.604	334.135
UP	ENSMUSG00000008153	1.6142	1.82424	2.18181	2.12645	2.07954	5.88189
CONTROL	ENSMUSG00000008167	36.2473	18.4477	32.0122	15.958	27.4052	17.1863
CONTROL	ENSMUSG00000008200	27.1716	14.0901	43.0067	18.2465	31.5716	38.6806
CONTROL	ENSMUSG00000008206	5.55603	9.52553	3.91597	7.7644	4.89569	9.94834
CONTROL	ENSMUSG00000008301	52.3575	41.6823	54.1342	43.9598	54.6087	47.41
DOWN	ENSMUSG00000008305	7.98505	6.11594	5.74204	2.80614	8.28451	2.03954
CONTROL	ENSMUSG00000008333	310.679	275.326	351.182	301.135	297.252	359.553
CONTROL	ENSMUSG00000008373	19.1109	14.4221	20.4103	13.723	18.852	20.2305
CONTROL	ENSMUSG00000008384	17.3401	23.4621	20.8342	22.3742	26.736	36.8048
UP	ENSMUSG00000008393	5.29433	5.17396	7.05187	7.53471	8.18923	11.1192
CONTROL	ENSMUSG00000008475	26.5106	16.1676	26.0572	14.5196	25.6844	13.7793
CONTROL	ENSMUSG00000008489	12.7056	6.64885	13.9263	7.57427	12.0096	9.21207
CONTROL	ENSMUSG00000008604	16.9018	13.6813	25.0753	18.4936	17.5583	16.1088
CONTROL	ENSMUSG00000008668	1318.96	3474.08	1459.25	3323.29	1477.13	2838.73
CONTROL	ENSMUSG00000008690	13.2866	19.9932	14.5195	25.1647	11.0147	18.668
UP	ENSMUSG00000008763	60.192	35.7825	77.6037	49.1237	59.0861	84.0007
UP	ENSMUSG00000008859	15.9815	14.4008	23.6158	15.1013	19.134	19.6947
CONTROL	ENSMUSG00000008892	83.8566	42.2633	79.8041	40.8182	73.5725	56.0287
CONTROL	ENSMUSG00000008958	170.787	86.4379	196.548	106.374	196.813	113.928
DOWN	ENSMUSG00000009013	132.256	141.327	138.208	108.667	175.013	75.7438
CONTROL	ENSMUSG00000009073	19.1516	11.1792	23.4236	12.3771	15.0894	13.025
DOWN	ENSMUSG00000009079	32.6042	45.9817	34.3968	34.4131	44.9237	16.2002
UP	ENSMUSG00000009090	26.9702	9.80882	28.0679	13.9462	16.7441	56.84
UP	ENSMUSG00000009291	9.52298	10.7877	12.9044	14.8112	9.61888	22.2911
DOWN	ENSMUSG00000009535	11.1189	10.3804	10.305	7.76533	10.9188	6.81142
DOWN	ENSMUSG00000009555	18.3109	17.323	20.6886	15.287	22.6478	7.29598
CONTROL	ENSMUSG00000009563	8.83275	12.9412	15.7694	17.3662	16.4301	15.5085
DOWN	ENSMUSG00000009566	41.4938	18.8257	48.8016	14.8976	47.2436	5.64185
UP	ENSMUSG00000009575	304.312	101.527	379.709	135.936	342.259	211.912
CONTROL	ENSMUSG00000009647	8.122	3.81596	10.1762	5.64046	10.3941	5.05244
UP	ENSMUSG00000009681	6.44226	4.4226	9.61901	4.89934	6.8444	6.28229
CONTROL	ENSMUSG00000009741	27.4072	16.3414	34.5111	17.1593	26.9632	20.0791
UP	ENSMUSG00000009894	13.0236	12.6455	14.8906	15.5591	21.4377	41.2283
CONTROL	ENSMUSG00000009927	1130.6	1249.86	1136.5	1180.71	1627.19	819.281
UP	ENSMUSG00000009995	5.21492	3.25363	7.902	4.61594	5.84616	7.13101
CONTROL	ENSMUSG00000010045	5.23263	4.14526	9.9556	7.50352	6.1614	7.90797
DOWN	ENSMUSG00000010047	10.0399	8.4011	16.59	6.77329	12.5294	1.66443
CONTROL	ENSMUSG00000010048	24.1465	16.065	26.4307	16.6954	18.6579	20.2882
CONTROL	ENSMUSG00000010054	18.2035	15.3478	20.7501	14.424	22.6005	17.6953
UP	ENSMUSG00000010057	6.28408	6.2637	7.1129	6.80286	8.42112	17.9845
DOWN	ENSMUSG00000010095	70.3202	59.1964	55.8442	40.0264	66.9623	29.5202
UP	ENSMUSG00000010097	124.265	108.453	128.208	116.997	111.098	218.294
UP	ENSMUSG00000010110	5.77926	3.66127	4.73279	4.12557	5.47676	8.47708
DOWN	ENSMUSG00000010154	7.5356	8.94297	3.13811	4.13903	3.89381	1.28379
DOWN	ENSMUSG00000010277	14.9351	11.8907	17.3057	9.34686	23.7291	7.83293
UP	ENSMUSG00000010342	9.98521	15.2724	14.582	16.7788	24.1968	37.1235
CONTROL	ENSMUSG00000010362	12.7972	10.7979	17.1001	12.3421	18.1632	16.8872
CONTROL	ENSMUSG00000010376	633.522	697.65	701.925	772.092	590.906	684.579
CONTROL	ENSMUSG00000010453	10.9085	5.20143	12.3932	5.65903	10.2602	5.89217
CONTROL	ENSMUSG00000010517	9.08281	9.19	11.6467	8.54861	8.79138	7.72135
CONTROL	ENSMUSG00000010607	19.0548	16.4684	32.7082	22.9813	18.991	24.0045
CONTROL	ENSMUSG00000010608	136.561	112.782	171.249	113.019	121.505	114.066
UP	ENSMUSG00000010755	40.2855	48.4196	33.2619	50.8859	24.0858	69.52
CONTROL	ENSMUSG00000010760	14.158	31.8941	4.61103	22.6038	23.2406	40.8846
CONTROL	ENSMUSG00000010914	7.46085	6.29833	6.7337	5.84484	7.34706	5.73044
CONTROL	ENSMUSG00000011096	8.74925	7.9505	9.35362	7.27559	6.40046	14.341
CONTROL	ENSMUSG00000011114	42.1441	23.4422	50.3311	27.4454	48.2297	19.5423
DOWN	ENSMUSG00000011179	118.223	153.25	114.135	114.276	170.213	59.7918
DOWN	ENSMUSG00000011256	10.4938	5.46739	8.51355	3.18706	5.25591	1.80441
DOWN	ENSMUSG00000011257	57.3088	70.3032	49.4492	42.3306	83.479	47.5035
DOWN	ENSMUSG00000011267	26.1018	56.0715	31.003	53.1763	20.5444	26.0416
CONTROL	ENSMUSG00000011306	10.9805	8.10521	8.82077	8.39757	8.9703	11.4809
CONTROL	ENSMUSG00000011589	64.1555	106.063	37.3681	88.7528	56.6614	85.0282
CONTROL	ENSMUSG00000011658	10.7813	6.27965	17.293	7.22597	12.3798	7.56874
CONTROL	ENSMUSG00000011752	532.386	335.154	587.867	401.902	479.176	505.662
CONTROL	ENSMUSG00000011831	32.4214	19.0214	47.1656	31.606	35.2552	47.9429
CONTROL	ENSMUSG00000011837	53.1243	30.8966	57.1656	33.3304	40.0604	41.253
CONTROL	ENSMUSG00000011877	7.83871	7.21603	9.77659	8.39418	7.60286	12.7149
DOWN	ENSMUSG00000011884	33.9034	20.1139	35.5595	15.0547	36.728	7.25993
CONTROL	ENSMUSG00000011958	15.9962	14.4512	22.5082	18.005	17.5816	18.809
CONTROL	ENSMUSG00000011960	50.4703	32.7573	58.2954	30.9594	59.3768	38.4335
CONTROL	ENSMUSG00000012114	9.07858	7.82276	11.3642	9.34645	7.85212	13.3393
CONTROL	ENSMUSG00000012123	74.9781	80.1956	101.09	76.3405	106.853	45.3358
CONTROL	ENSMUSG00000012296	16.9942	16.3463	15.0833	13.5963	19.7002	12.7874
DOWN	ENSMUSG00000012396	123.848	45.1302	147.979	44.9044	112.544	6.66068
CONTROL	ENSMUSG00000012405	319.296	550.672	354.364	554.597	338.475	594.397
DOWN	ENSMUSG00000012443	11.0297	6.86131	11.546	5.09334	9.90941	3.43589
DOWN	ENSMUSG00000012535	89.1362	67.2917	97.4135	62.7973	86.6676	53.1226
UP	ENSMUSG00000013033	26.8079	9.05763	32.3286	12.0129	36.6984	19.2007
CONTROL	ENSMUSG00000013089	17.2475	29.8118	17.1688	25.6957	19.8974	33.7774
DOWN	ENSMUSG00000013155	20.4145	42.1285	23.8717	36.532	14.634	21.2827
CONTROL	ENSMUSG00000013160	18.2788	15.8791	22.7269	13.268	19.57	13.2996
UP	ENSMUSG00000013415	21.2177	36.3468	23.3197	40.5447	30.4912	57.0918
CONTROL	ENSMUSG00000013465	14.6683	12.1367	15.9083	11.0785	15.8178	15.2436
CONTROL	ENSMUSG00000013593	146.213	164.615	172.574	210.66	148.667	174.361
CONTROL	ENSMUSG00000013622	33.3748	26.31	41.6337	25.2848	25.0042	38.4233
CONTROL	ENSMUSG00000013629	23.7127	14.2643	30.0019	12.1876	27.7745	12.7458
CONTROL	ENSMUSG00000013646	7.1136	11.1413	5.88299	8.60192	7.09107	13.9407
DOWN	ENSMUSG00000013662	7.38398	6.6167	8.7715	5.59067	7.60238	3.09782
UP	ENSMUSG00000013698	2.76249	2.78614	5.76805	4.04978	6.8192	25.5575
DOWN	ENSMUSG00000013701	122.405	106.403	135.543	82.5085	140.66	26.7728
DOWN	ENSMUSG00000013736	34.3933	21.5475	30.153	16.2323	24.7118	18.2283
CONTROL	ENSMUSG00000013787	19.0891	21.7268	32.1996	18.7811	21.3387	17.1302
CONTROL	ENSMUSG00000013822	55.7793	49.2844	87.5487	69.3797	58.5504	96.6193
UP	ENSMUSG00000013833	13.449	8.81478	20.854	16.4856	22.672	35.5734
UP	ENSMUSG00000013858	6.83742	5.81422	9.03448	6.8108	6.55553	11.758
UP	ENSMUSG00000013921	2.42636	1.77887	2.36184	2.6275	2.47242	7.04385
CONTROL	ENSMUSG00000013973	11.4033	7.38599	13.4871	7.62391	14.6145	8.0756
CONTROL	ENSMUSG00000014074	18.9386	13.0239	21.6367	12.9225	18.1648	14.7364
DOWN	ENSMUSG00000014075	24.8892	16.6574	31.2884	16.6834	27.0009	6.53477
CONTROL	ENSMUSG00000014077	7.09528	5.72497	9.25178	6.68903	10.3379	6.49324
CONTROL	ENSMUSG00000014177	4.98052	3.58942	5.14603	3.14557	6.88497	6.08978
CONTROL	ENSMUSG00000014195	217.366	128.595	225.886	98.8494	243.584	105.471
CONTROL	ENSMUSG00000014226	95.5848	74.0728	108.231	67.7065	82.8231	67.2808
CONTROL	ENSMUSG00000014232	15.4989	9.69388	20.3624	11.85	14.4305	5.5161
CONTROL	ENSMUSG00000014243	23.069	27.5409	21.6882	23.126	24.8354	23.4551
CONTROL	ENSMUSG00000014245	6.49384	3.61122	13.3189	4.44811	5.77087	5.32088
UP	ENSMUSG00000014294	252.452	233.032	346.647	323.375	300.702	627.733
UP	ENSMUSG00000014301	121.823	132.841	134.41	124.033	168.808	163.492
CONTROL	ENSMUSG00000014313	891.625	680.857	1205.55	773.443	1002.67	870.606
CONTROL	ENSMUSG00000014444	3.80335	5.33357	2.55113	4.47089	2.75018	4.80878
DOWN	ENSMUSG00000014550	12.6019	6.24015	14.5921	6.70929	10.5362	4.87594
CONTROL	ENSMUSG00000014551	33.2608	38.5877	30.4468	36.7649	38.7789	30.3827
CONTROL	ENSMUSG00000014554	46.4477	31.2756	59.3872	36.2855	42.6778	44.524
CONTROL	ENSMUSG00000014592	2.99493	8.25562	3.08017	6.08943	2.6977	1.42225
CONTROL	ENSMUSG00000014601	9.30327	15.2274	9.1095	13.5241	11.4094	13.2795
CONTROL	ENSMUSG00000014606	29.2297	19.2413	36.0905	19.2251	27.0886	21.9532
CONTROL	ENSMUSG00000014633	16.0609	34.0569	12.3728	29.8759	8.56532	23.3826
UP	ENSMUSG00000014668	15.6798	7.36723	17.4988	8.23795	15.2269	17.1791
CONTROL	ENSMUSG00000014748	44.732	28.2018	51.8619	31.3591	41.8317	45.6332
CONTROL	ENSMUSG00000014769	98.1273	73.8647	107.257	74.7205	114.038	113.274
UP	ENSMUSG00000014778	10.8234	5.18209	14.1104	7.53632	9.42005	11.8784
CONTROL	ENSMUSG00000014856	43.4995	62.3122	39.1782	68.5984	35.7036	99.6152
DOWN	ENSMUSG00000014859	54.093	75.0234	51.033	39.3627	49.7766	22.4673
CONTROL	ENSMUSG00000014867	24.0501	19.6169	24.6714	19.8873	23.4381	18.1544
DOWN	ENSMUSG00000014873	37.2437	31.7148	32.1355	19.5245	39.0279	12.1669
CONTROL	ENSMUSG00000014907	21.6874	19.8478	20.8446	19.1122	16.1622	18.8664
DOWN	ENSMUSG00000014956	5.88946	8.5305	7.51805	7.31514	9.564	1.6325
CONTROL	ENSMUSG00000014959	22.9056	16.2882	27.1823	16.4759	23.8886	19.7435
DOWN	ENSMUSG00000014980	13.9528	16.2723	13.6431	12.0104	20.0559	5.84054
CONTROL	ENSMUSG00000015002	21.9966	23.8333	34.1733	36.5854	17.5354	37.6798
CONTROL	ENSMUSG00000015013	30.4988	24.913	31.3044	23.3373	27.207	27.71
UP	ENSMUSG00000015016	2.3034	2.5957	2.05489	2.73638	1.71008	5.68832
CONTROL	ENSMUSG00000015087	50.5977	26.1043	71.9533	33.5168	49.2544	41.0881
UP	ENSMUSG00000015092	183.292	236.149	244.91	303.113	213.163	424.132
UP	ENSMUSG00000015112	120.233	43.2973	129.357	62.0885	97.7152	113.247
CONTROL	ENSMUSG00000015126	91.8884	70.7509	105.401	67.7356	105.426	54.8274
DOWN	ENSMUSG00000015134	7.14021	15.2389	4.09338	8.53917	11.0329	5.61106
CONTROL	ENSMUSG00000015143	29.1192	29.9182	28.1909	21.8651	41.9316	24.9818
CONTROL	ENSMUSG00000015176	96.6628	87.895	98.8329	103.458	79.343	117.261
DOWN	ENSMUSG00000015217	26.3394	22.6587	29.5753	19.2754	46.1205	10.6074
CONTROL	ENSMUSG00000015289	27.6422	21.9031	34.7026	22.9715	25.1585	17.0647
CONTROL	ENSMUSG00000015290	54.0735	22.104	69.6501	33.9254	52.6179	31.6791
DOWN	ENSMUSG00000015341	11.9823	18.2796	11.8547	12.1799	11.6263	5.22991
CONTROL	ENSMUSG00000015363	6.9225	6.82521	6.58001	6.76351	9.19154	7.05058
CONTROL	ENSMUSG00000015461	101.177	33.6712	129.078	43.0277	119.084	57.249
CONTROL	ENSMUSG00000015488	9.75071	6.18976	12.1521	8.81722	7.48891	8.19436
CONTROL	ENSMUSG00000015536	7.27702	5.64286	9.26867	4.89251	9.93173	4.55938
CONTROL	ENSMUSG00000015575	103.238	79.3878	102.28	81.1038	136.595	67.9775
CONTROL	ENSMUSG00000015597	35.183	17.6429	43.3085	23.8837	34.121	28.1899
DOWN	ENSMUSG00000015605	0.930705	7.27242	3.49233	3.00731	3.60469	0.324387
CONTROL	ENSMUSG00000015647	9.53226	13.4702	25.6064	18.5641	17.8839	18.6382
CONTROL	ENSMUSG00000015652	3.01349	6.02148	1.7473	4.96683	5.70213	7.93117
CONTROL	ENSMUSG00000015668	6.88584	5.75656	9.49468	5.97781	6.94888	7.12673
CONTROL	ENSMUSG00000015711	20.7804	11.9352	22.2549	13.2486	21.6445	9.92488
UP	ENSMUSG00000015747	8.31965	9.89245	15.5769	9.40529	5.86412	34.0507
CONTROL	ENSMUSG00000015748	19.6796	23.4092	17.5869	15.1723	17.9905	20.4879
DOWN	ENSMUSG00000015749	33.3399	27.9314	41.9507	23.4891	40.8789	22.8122
CONTROL	ENSMUSG00000015750	19.9616	11.8444	23.9154	12.0043	18.5303	11.1172
CONTROL	ENSMUSG00000015755	7.84876	6.52126	9.63738	6.61377	9.01795	7.65387
CONTROL	ENSMUSG00000015757	25.8696	16.6425	29.0373	14.1575	22.5891	19.1165
CONTROL	ENSMUSG00000015759	21.9149	23.5562	26.7307	21.8345	26.1516	21.3463
CONTROL	ENSMUSG00000015766	12.9984	14.4549	7.9207	10.4549	10.2955	10.4429
CONTROL	ENSMUSG00000015790	9.10021	10.3284	10.1305	9.89632	9.44252	10.5871
CONTROL	ENSMUSG00000015806	147.233	89.9496	152.208	83.0755	147.596	82.2566
CONTROL	ENSMUSG00000015837	52.4306	32.6693	61.0492	29.9462	49.7242	40.5071
CONTROL	ENSMUSG00000015839	29.394	16.6947	31.5543	15.4871	29.9593	17.9892
CONTROL	ENSMUSG00000015869	32.9997	36.6017	41.7527	34.296	35.3403	42.5795
DOWN	ENSMUSG00000015880	16.3631	10.1337	14.4955	8.57091	15.7187	8.00244
CONTROL	ENSMUSG00000015932	174.45	132.03	230.974	153.869	169.485	193.966
CONTROL	ENSMUSG00000015937	74.0706	43.7043	63.0859	48.5009	68.464	50.998
CONTROL	ENSMUSG00000015943	40.5848	46.02	55.1581	45.1143	40.9318	69.1655
DOWN	ENSMUSG00000015961	13.1481	10.2825	14.2149	8.88256	13.1001	6.38656
CONTROL	ENSMUSG00000015971	7.44895	5.0842	9.0401	4.76267	7.07283	3.29296
CONTROL	ENSMUSG00000015994	24.9675	42.7169	17.4104	32.9292	21.6965	21.7289
CONTROL	ENSMUSG00000016252	544.462	713.759	602.501	699.101	725.945	599.884
UP	ENSMUSG00000016253	102.491	52.2416	141.552	54.8485	128.314	184.832
CONTROL	ENSMUSG00000016256	14.8589	21.4091	15.4781	22.2431	13.9375	30.4999
CONTROL	ENSMUSG00000016257	33.977	26.3913	39.3427	23.2168	34.4873	39.1694
CONTROL	ENSMUSG00000016308	48.0936	37.1286	61.408	32.867	53.8158	29.6243
DOWN	ENSMUSG00000016319	146.547	122.698	133.906	102.605	193.06	28.8896
DOWN	ENSMUSG00000016344	42.5886	54.0598	59.9187	62.2356	53.577	34.7379
UP	ENSMUSG00000016487	22.0819	9.06633	23.5514	13.5259	24.349	42.1029
CONTROL	ENSMUSG00000016510	8.193	7.72353	6.43136	7.91137	6.80405	9.16891
DOWN	ENSMUSG00000016526	4.60691	5.13777	5.59338	5.26064	3.72264	2.20228
UP	ENSMUSG00000016528	4.63762	2.96049	8.42959	4.99452	8.49731	6.94792
UP	ENSMUSG00000016541	27.4731	16.7126	36.333	21.6596	42.1002	38.9715
CONTROL	ENSMUSG00000016559	120.24	111.854	141.204	102.359	133.392	120.094
CONTROL	ENSMUSG00000016619	17.3966	12.0965	19.4686	14.1104	17.5224	13.1137
CONTROL	ENSMUSG00000016624	3.69079	15.1571	9.20205	8.91684	5.15225	34.0896
CONTROL	ENSMUSG00000016637	5.79875	8.02406	9.13536	11.7303	8.07785	12.0698
CONTROL	ENSMUSG00000016664	5.92078	4.43718	7.00897	4.90531	8.1491	5.5772
CONTROL	ENSMUSG00000016757	5.45992	9.37875	6.62455	9.45793	7.75326	12.5369
DOWN	ENSMUSG00000016918	4.42774	6.6085	4.357	2.51914	3.49289	0.812325
DOWN	ENSMUSG00000016921	20.3103	21.4603	24.7142	17.0614	24.4008	11.3607
UP	ENSMUSG00000016940	15.5847	9.05386	23.312	11.3472	15.7083	31.2836
DOWN	ENSMUSG00000016946	7.782	13.4999	7.89734	8.47487	11.6831	2.32092
UP	ENSMUSG00000017009	2.1256	3.0568	3.52449	6.72613	1.62394	9.05546
CONTROL	ENSMUSG00000017176	7.24064	6.46172	8.7644	7.07171	8.90578	7.21093
CONTROL	ENSMUSG00000017188	83.6774	44.789	106.964	42.758	88.7799	37.253
DOWN	ENSMUSG00000017286	16.1513	9.80028	18.7001	9.57188	14.4811	5.50096
UP	ENSMUSG00000017288	10.6634	9.09792	18.2391	11.3961	17.2465	13.9542
CONTROL	ENSMUSG00000017291	8.67374	5.82078	11.7096	5.17807	13.4497	5.39008
CONTROL	ENSMUSG00000017299	6.92418	7.2346	9.9118	8.30966	5.72575	7.40743
UP	ENSMUSG00000017307	25.3635	22.8669	32.9307	34.6348	29.9024	42.6487
UP	ENSMUSG00000017376	8.53545	4.85299	12.3881	6.28871	13.3543	12.0212
UP	ENSMUSG00000017390	7.59114	5.53319	8.86568	5.13972	14.2676	10.4886
CONTROL	ENSMUSG00000017404	1557.06	1512.5	1831	1649.97	1673.62	1732.15
CONTROL	ENSMUSG00000017421	30.6522	29.8937	35.4905	25.207	35.2949	21.9985
DOWN	ENSMUSG00000017428	108.467	116.357	101.674	81.4472	122.872	40.6592
DOWN	ENSMUSG00000017453	7.61197	16.5295	5.60084	7.17811	7.58183	1.03033
CONTROL	ENSMUSG00000017478	55.592	48.1805	54.9877	40.0094	52.7791	45.4987
CONTROL	ENSMUSG00000017561	16.7347	14.4225	17.4664	12.2242	15.5706	11.0808
CONTROL	ENSMUSG00000017615	14.3946	8.30251	12.101	8.87584	14.1671	13.1174
CONTROL	ENSMUSG00000017664	6.29049	23.3969	6.84621	22.866	4.84435	39.792
DOWN	ENSMUSG00000017716	111.844	83.3398	128.717	80.2834	123.575	31.427
CONTROL	ENSMUSG00000017718	1.76655	1.07697	1.30716	0.803649	1.71501	6.51014
UP	ENSMUSG00000017721	32.3678	13.6055	50.6818	17.4452	33.8571	51.8437
UP	ENSMUSG00000017723	220.401	41.6688	244.333	71.3887	232.794	132.656
UP	ENSMUSG00000017724	0.955208	33.732	15.8627	36.8979	4.22362	84.4332
UP	ENSMUSG00000017737	0	0.0921643	0.165755	0.521857	0.835769	6.82335
CONTROL	ENSMUSG00000017754	16.9253	4.22155	15.9545	3.89727	22.171	6.10498
CONTROL	ENSMUSG00000017764	7.56482	5.49041	6.48785	6.47534	8.71781	9.68928
UP	ENSMUSG00000017765	1.75681	2.97953	1.79126	2.3514	1.90445	7.38619
UP	ENSMUSG00000017774	1.10996	2.3731	1.2803	2.25426	1.715	5.67045
CONTROL	ENSMUSG00000017781	7.63466	7.71946	8.79485	8.57448	10.7538	11.039
CONTROL	ENSMUSG00000017801	20.6913	14.5968	18.8096	11.3999	22.2799	13.209
CONTROL	ENSMUSG00000017831	6.71538	4.62746	9.1375	5.14694	8.08231	9.64838
UP	ENSMUSG00000017837	3.87242	5.71454	7.21965	8.93517	4.37257	10.5152
CONTROL	ENSMUSG00000017843	49.0389	27.3864	52.5284	29.4072	49.0897	27.3663
CONTROL	ENSMUSG00000017861	96.4458	48.0055	130.731	71.6348	64.1844	63.4425
CONTROL	ENSMUSG00000017999	89.1851	72.3718	101.944	72.7881	97.8147	108.042
UP	ENSMUSG00000018042	25.3982	33.8436	42.1022	55.0138	34.9021	88.1249
CONTROL	ENSMUSG00000018171	6.93064	8.54613	10.7048	10.4441	7.63	25.0984
CONTROL	ENSMUSG00000018189	54.1855	66.0882	57.6481	47.4898	55.9409	43.1735
CONTROL	ENSMUSG00000018239	81.4714	55.3992	88.898	60.367	70.0041	83.6075
CONTROL	ENSMUSG00000018287	403.251	254.594	447.14	233.677	460.134	260.668
DOWN	ENSMUSG00000018293	64.2963	205.518	71.9665	141.47	158.202	5.66387
CONTROL	ENSMUSG00000018322	9.92247	12.417	11.6647	8.75861	15.1567	7.70905
UP	ENSMUSG00000018326	80.5629	48.4607	96.6963	59.0571	92.8401	90.4747
UP	ENSMUSG00000018339	4.11925	4.51563	7.44393	5.44465	10.7331	42.9979
UP	ENSMUSG00000018340	13.4331	7.82448	18.3257	11.7713	22.9643	32.4748
DOWN	ENSMUSG00000018362	44.709	20.1564	48.5478	15.852	43.4287	13.0004
UP	ENSMUSG00000018372	3.01688	1.88974	3.25244	1.82917	4.25423	5.44584
UP	ENSMUSG00000018377	3.1412	2.02241	4.39456	2.85099	4.65359	7.00775
DOWN	ENSMUSG00000018379	21.6577	25.5501	28.678	17.9891	29.6374	4.47721
UP	ENSMUSG00000018381	2.23819	2.77931	3.96479	4.5288	1.84038	8.51206
UP	ENSMUSG00000018395	8.5156	7.07819	13.402	8.71416	9.9066	12.9386
CONTROL	ENSMUSG00000018405	10.5639	5.41013	13.0721	5.47855	10.3275	5.17801
CONTROL	ENSMUSG00000018428	9.71819	6.3105	12.9007	6.65974	13.6832	6.03298
CONTROL	ENSMUSG00000018433	25.5999	20.1567	23.9729	17.8975	26.6448	19.2391
DOWN	ENSMUSG00000018446	519.339	298.62	442.652	256.255	625.505	150.562
CONTROL	ENSMUSG00000018449	17.0372	12.7943	18.638	12.101	22.0585	12.171
CONTROL	ENSMUSG00000018501	78.7419	126.25	126.121	153.429	85.3085	124.238
DOWN	ENSMUSG00000018509	29.9215	25.2818	33.0446	27.0288	18.0518	6.55445
CONTROL	ENSMUSG00000018537	19.4985	18.8272	19.7746	19.3346	27.9698	30.24
CONTROL	ENSMUSG00000018541	14.7877	12.8436	14.2572	11.3464	13.9288	16.772
DOWN	ENSMUSG00000018547	5.96772	6.26047	7.78407	5.61117	11.3046	3.57045
CONTROL	ENSMUSG00000018548	16.4895	7.89972	19.994	9.34416	15.6483	12.5429
CONTROL	ENSMUSG00000018559	56.951	33.8808	76.418	42.3061	54.4607	32.8207
CONTROL	ENSMUSG00000018572	49.6413	35.8434	55.2409	42.3639	52.5441	46.7788
UP	ENSMUSG00000018574	6.60133	11.949	8.40581	24.9778	5.45302	47.3958
DOWN	ENSMUSG00000018583	55.9634	43.727	52.0972	32.8947	65.9865	23.0217
UP	ENSMUSG00000018593	68.546	55.113	98.3512	65.6257	109.024	234.592
CONTROL	ENSMUSG00000018599	10.4397	6.10804	9.14615	5.17918	10.8911	5.12399
CONTROL	ENSMUSG00000018648	5.45499	3.4261	3.67084	2.19742	5.43039	5.18556
CONTROL	ENSMUSG00000018651	30.2481	27.72	31.8977	24.3869	34.7611	20.546
CONTROL	ENSMUSG00000018659	18.944	12.8312	17.4229	13.1191	17.4258	18.3041
DOWN	ENSMUSG00000018666	234.213	224.176	267.089	208.637	289.274	121.253
UP	ENSMUSG00000018669	20.1861	15.3355	21.6356	17.6345	18.7738	27.8502
UP	ENSMUSG00000018677	368.986	83.8121	516.257	185.375	380.495	254.844
DOWN	ENSMUSG00000018678	20.8569	13.039	27.6144	9.40906	27.3968	2.80828
UP	ENSMUSG00000018707	9.86275	8.53075	12.7725	10.6985	11.6118	26.6877
CONTROL	ENSMUSG00000018727	6.10924	2.82365	6.82448	5.72888	4.68389	6.18633
CONTROL	ENSMUSG00000018761	138.435	107.939	157.653	113.382	129.113	164.695
CONTROL	ENSMUSG00000018765	17.2978	11.4978	27.0671	12.1886	18.497	12.6155
DOWN	ENSMUSG00000018770	1222	945.579	1791.96	1043.39	1312.47	285.344
CONTROL	ENSMUSG00000018774	5.01654	3.9338	4.61308	5.08725	3.87057	6.6906
CONTROL	ENSMUSG00000018796	19.3632	5.73943	11.5426	4.32557	16.7673	6.68832
UP	ENSMUSG00000018821	104.219	63.7973	103.543	64.1255	100.401	144.386
UP	ENSMUSG00000018858	6.71834	14.1544	7.85838	15.2847	7.04529	26.7639
UP	ENSMUSG00000018861	20.0396	12.9684	20.9769	14.372	21.8857	38.1671
DOWN	ENSMUSG00000018865	3.4922	12.6375	2.03251	6.1755	3.45357	3.52759
CONTROL	ENSMUSG00000018882	48.6624	44.3474	42.7781	40.3008	39.2146	43.2955
CONTROL	ENSMUSG00000018899	7.18576	4.19731	6.7911	4.82943	10.2272	5.85376
CONTROL	ENSMUSG00000018919	1.50175	1.86579	3.33089	1.95301	2.85696	7.26029
DOWN	ENSMUSG00000018923	36.5012	45.0437	36.1983	36.6122	48.9701	26.103
CONTROL	ENSMUSG00000018932	24.3566	23.1172	30.8663	24.2121	31.9632	17.3016
CONTROL	ENSMUSG00000018965	140.532	105.269	151.546	95.0697	138.471	107.406
CONTROL	ENSMUSG00000018974	33.693	18.5893	39.9238	18.3596	34.4756	17.9776
CONTROL	ENSMUSG00000019039	10.8834	16.3881	12.3826	21.4311	8.00986	12.9041
CONTROL	ENSMUSG00000019054	42.1785	42.0285	67.5528	49.8113	55.9393	58.9808
UP	ENSMUSG00000019055	2.32958	2.29789	2.95527	1.93611	3.92766	7.21597
UP	ENSMUSG00000019087	21.9515	11.5183	37.1029	16.5393	28.0733	47.3011
UP	ENSMUSG00000019124	0.54205	0.731598	1.89393	2.26216	1.63311	5.47414
CONTROL	ENSMUSG00000019158	47.4877	176.005	63.713	202.398	61.9397	265.804
UP	ENSMUSG00000019173	44.9491	21.9691	52.8658	28.7878	47.6509	54.2693
UP	ENSMUSG00000019179	253.595	175.583	306.132	217.947	262.133	275.939
UP	ENSMUSG00000019188	4.76417	5.10639	5.88788	6.54098	5.06422	8.56172
DOWN	ENSMUSG00000019189	6.92095	6.18625	7.64192	5.55994	8.64015	4.09555
CONTROL	ENSMUSG00000019210	176.315	105.57	164.521	101.788	144.084	142.431
CONTROL	ENSMUSG00000019214	21.3726	14.7297	16.2045	15.7951	13.0671	14.9896
UP	ENSMUSG00000019235	3.86974	1.52688	3.30794	1.17013	4.15214	6.02341
UP	ENSMUSG00000019254	31.6019	16.2046	38.0289	23.8289	27.2261	33.0679
CONTROL	ENSMUSG00000019261	88.3036	56.9737	74.0995	66.7238	67.241	56.1551
DOWN	ENSMUSG00000019297	22.3941	14.0101	21.035	11.1834	24.4825	6.13804
UP	ENSMUSG00000019302	5.12637	2.69074	5.89845	4.23347	6.3214	11.7281
DOWN	ENSMUSG00000019303	9.38504	12.6136	10.6548	11.103	10.3443	4.9939
CONTROL	ENSMUSG00000019312	10.6552	7.77473	8.61885	9.02743	13.3753	10.7206
CONTROL	ENSMUSG00000019362	128.613	148.579	130.151	152.125	125.981	233.202
CONTROL	ENSMUSG00000019370	149.197	119.943	153.786	111.85	182.847	157.505
DOWN	ENSMUSG00000019373	67.7473	81.5805	70.4197	60.6074	88.8164	33.985
CONTROL	ENSMUSG00000019428	134.585	142.251	144.675	152.727	136.82	204.357
CONTROL	ENSMUSG00000019432	61.3249	58.995	86.2949	65.0175	79.6513	57.5789
CONTROL	ENSMUSG00000019433	22.0782	8.53554	24.1005	12.5383	14.9612	14.9378
CONTROL	ENSMUSG00000019437	20.4546	12.0594	19.8025	11.3549	22.5586	11.0846
UP	ENSMUSG00000019467	9.82961	11.0617	14.05	10.8896	19.5149	32.669
DOWN	ENSMUSG00000019470	5.81251	8.87751	6.8805	7.07155	4.74011	5.30109
CONTROL	ENSMUSG00000019471	31.9373	21.341	35.7784	28.8469	30.239	33.9983
CONTROL	ENSMUSG00000019478	11.1381	9.37026	11.3762	8.95067	9.43751	6.77357
DOWN	ENSMUSG00000019487	2.39243	8.06508	3.5386	6.12885	4.74346	2.47123
CONTROL	ENSMUSG00000019494	35.5343	32.3675	45.8881	34.7373	40.0601	39.7245
CONTROL	ENSMUSG00000019505	207.199	163.357	288.421	184.849	243.425	142.399
UP	ENSMUSG00000019539	21.7721	11.1659	9.01956	8.75164	32.6176	35.5121
UP	ENSMUSG00000019564	1.23891	1.55673	2.49095	1.89806	1.61009	7.03559
CONTROL	ENSMUSG00000019578	5.49151	5.93244	5.18906	6.38997	3.87394	8.5536
CONTROL	ENSMUSG00000019579	31.8759	17.5512	34.601	19.6816	33.129	17.6094
CONTROL	ENSMUSG00000019659	65.1	84.5686	58.1265	87.2877	60.3661	83.8722
DOWN	ENSMUSG00000019715	8.55541	10.9568	8.97443	7.05624	9.75157	4.60274
DOWN	ENSMUSG00000019731	4.84229	5.08714	4.44239	4.05164	4.19508	3.6232
CONTROL	ENSMUSG00000019734	5.7829	7.27867	7.9702	6.92634	7.07814	20.2217
DOWN	ENSMUSG00000019761	1.32428	5.28262	1.59083	2.29313	4.03411	0.165217
DOWN	ENSMUSG00000019773	54.1939	32.1087	56.2417	25.224	56.6923	7.04936
DOWN	ENSMUSG00000019782	68.2485	92.6031	91.5054	65.9248	112.029	12.2364
CONTROL	ENSMUSG00000019794	55.6936	78.201	59.0114	54.4703	72.9605	34.2454
CONTROL	ENSMUSG00000019795	13.4433	8.99224	14.6313	9.3519	16.3767	8.27656
UP	ENSMUSG00000019802	5.505	3.50376	6.30791	4.62263	5.91016	8.0474
DOWN	ENSMUSG00000019804	99.3798	156.061	135.819	95.2707	168.013	37.4945
CONTROL	ENSMUSG00000019808	7.94501	7.26084	10.2066	6.91959	9.15418	5.69454
DOWN	ENSMUSG00000019814	19.0019	20.6281	17.8363	14.3245	23.206	10.1416
UP	ENSMUSG00000019823	11.8788	8.34718	7.83115	9.74119	18.021	47.3038
CONTROL	ENSMUSG00000019837	94.1066	82.6524	92.2603	87.7906	79.6755	91.691
CONTROL	ENSMUSG00000019851	2.68069	4.03156	1.11351	2.57612	1.49602	5.12718
UP	ENSMUSG00000019853	2.58036	1.60348	2.84534	1.66035	4.256	8.98416
DOWN	ENSMUSG00000019857	10.4773	10.0971	12.187	8.70661	10.7843	8.21096
CONTROL	ENSMUSG00000019863	10.5094	8.24246	9.59068	6.73767	11.6317	7.24893
CONTROL	ENSMUSG00000019878	18.7125	10.4543	17.8161	8.83959	15.8733	8.5367
CONTROL	ENSMUSG00000019897	11.2285	27.3816	13.6831	27.9596	9.02728	18.9115
UP	ENSMUSG00000019917	12.3969	5.16523	29.0215	9.65538	19.2448	14.4045
CONTROL	ENSMUSG00000019923	24.2554	25.4714	31.1918	20.6594	24.7147	12.8853
DOWN	ENSMUSG00000019942	22.9894	23.9832	31.3246	24.3419	28.3789	27.2685
UP	ENSMUSG00000019943	29.6023	16.708	33.1157	16.7255	34.4087	28.4199
CONTROL	ENSMUSG00000019948	8.13457	4.87589	7.39123	5.25241	8.66335	8.34385
DOWN	ENSMUSG00000019960	2.64396	24.0814	5.2777	14.5612	7.03042	5.10383
DOWN	ENSMUSG00000019961	27.8428	22.4286	30.5193	18.532	33.0049	11.8429
UP	ENSMUSG00000019969	4.47803	2.5522	5.97761	3.33642	5.33068	9.40316
DOWN	ENSMUSG00000019970	51.5113	47.1898	62.5142	44.7627	53.9559	21.3184
CONTROL	ENSMUSG00000019977	14.953	8.93572	14.5174	9.88587	14.615	9.19177
DOWN	ENSMUSG00000019978	13.4561	24.5079	17.5217	18.0281	21.9345	16.1476
DOWN	ENSMUSG00000019979	7.72657	12.0634	10.1667	9.62704	15.2549	0.859092
UP	ENSMUSG00000019986	2.65845	1.9035	3.00917	2.48101	3.63201	5.88694
DOWN	ENSMUSG00000019989	0.303773	6.80526	0.21284	3.33424	0.274566	0.029012
DOWN	ENSMUSG00000020018	121.473	181.333	155.773	124.694	213.369	103.718
CONTROL	ENSMUSG00000020022	218.96	114.775	209.997	124.74	217.91	216.924
CONTROL	ENSMUSG00000020024	13.7675	9.01053	12.8931	10.648	11.9337	14.2447
DOWN	ENSMUSG00000020027	106.157	96.9462	95.6873	83.147	112.85	70.1008
CONTROL	ENSMUSG00000020038	5.88628	5.46333	4.88742	5.3352	6.26621	7.36109
CONTROL	ENSMUSG00000020048	102.073	67.5322	102.452	62.0019	92.3229	65.7489
DOWN	ENSMUSG00000020063	9.79214	6.44613	11.0777	5.04454	8.26404	3.27266
CONTROL	ENSMUSG00000020069	8.98347	8.22127	9.22455	7.51941	15.3299	6.12581
UP	ENSMUSG00000020070	5.72693	2.95951	6.63277	3.35714	7.2913	11.9405
CONTROL	ENSMUSG00000020074	93.1372	86.345	108.065	82.5619	89.6585	83.4808
CONTROL	ENSMUSG00000020075	71.7488	75.6491	64.2915	78.3476	62.2652	102.535
DOWN	ENSMUSG00000020079	9.99283	15.4003	8.6761	10.4075	9.16291	3.24647
CONTROL	ENSMUSG00000020087	10.4541	8.43681	12.3645	10.5904	12.3567	8.5981
CONTROL	ENSMUSG00000020088	9.49509	15.9436	9.44195	12.5585	9.30851	13.5409
CONTROL	ENSMUSG00000020089	94.3561	73.1839	86.5836	63.0831	125.005	55.3531
DOWN	ENSMUSG00000020091	24.0527	20.2729	25.035	15.6545	36.2903	8.98029
CONTROL	ENSMUSG00000020092	26.9706	7.19177	19.0016	7.29768	28.6562	6.06299
UP	ENSMUSG00000020100	1.49023	0.811126	9.11936	3.1458	5.38552	5.19694
CONTROL	ENSMUSG00000020107	14.5814	16.8787	12.9885	15.0113	17.0228	17.9022
CONTROL	ENSMUSG00000020108	17.2778	17.2142	13.4121	26.7359	22.4678	16.081
CONTROL	ENSMUSG00000020109	8.22129	5.18535	6.84261	4.92873	7.40337	5.83989
UP	ENSMUSG00000020111	3.42308	2.98722	5.43931	3.94195	4.99209	8.13244
CONTROL	ENSMUSG00000020115	4.40092	3.41543	5.74356	3.76014	4.05081	9.1138
DOWN	ENSMUSG00000020116	49.0317	30.5	40.3818	24.1787	42.6049	22.3002
CONTROL	ENSMUSG00000020124	8.20509	4.20548	9.75758	4.71178	9.72931	8.286
CONTROL	ENSMUSG00000020132	4.69032	4.49211	5.39209	3.97107	6.40045	7.13504
CONTROL	ENSMUSG00000020133	16.4422	10.7166	16.3308	12.9514	12.582	11.2315
UP	ENSMUSG00000020137	2.95101	3.91252	2.74	4.45717	3.12325	12.9044
DOWN	ENSMUSG00000020149	10.8917	15.2875	14.3928	11.8522	15.7512	7.99421
CONTROL	ENSMUSG00000020152	7.47676	7.03291	8.89292	6.36143	8.5834	6.45382
CONTROL	ENSMUSG00000020156	99.23	91.2263	128.375	81.6701	116.178	99.8422
CONTROL	ENSMUSG00000020167	98.4048	36.221	99.0437	58.2693	101.326	68.5824
DOWN	ENSMUSG00000020173	32.9152	23.0019	31.019	24.1425	14.1091	21.502
CONTROL	ENSMUSG00000020180	123.188	71.1145	134.687	81.0348	79.5261	185.728
DOWN	ENSMUSG00000020182	21.787	21.035	60.9587	39.8673	12.3504	4.76249
CONTROL	ENSMUSG00000020184	14.0503	15.0384	13.9892	14.5309	19.6642	18.6262
DOWN	ENSMUSG00000020186	142.743	172.613	97.4024	108.988	85.149	68.525
CONTROL	ENSMUSG00000020190	25.1685	13.3158	26.6572	10.1001	34.4864	9.80832
CONTROL	ENSMUSG00000020196	4.55225	4.87552	4.62593	4.9138	3.81001	5.29871
UP	ENSMUSG00000020198	24.5278	17.3594	32.2732	21.5842	30.601	42.9539
UP	ENSMUSG00000020205	2.63306	6.76382	3.95626	8.25541	15.4192	29.5856
CONTROL	ENSMUSG00000020211	35.6929	28.914	42.492	35.7379	35.6727	34.2658
CONTROL	ENSMUSG00000020212	4.69155	2.53012	4.02011	3.49284	2.99388	8.28444
CONTROL	ENSMUSG00000020219	40.9732	214.53	44.6713	272.329	33.9361	274.277
CONTROL	ENSMUSG00000020224	66.6575	47.2283	77.998	44.8864	88.265	43.7866
UP	ENSMUSG00000020230	1.4914	3.10104	2.40268	4.13013	5.91108	13.8376
CONTROL	ENSMUSG00000020232	186.586	108.939	152.514	124.623	109.435	161.298
CONTROL	ENSMUSG00000020235	40.1202	57.3772	36.6158	72.3928	35.9056	74.4088
UP	ENSMUSG00000020238	22.0501	18.9107	35.2128	30.6885	22.216	47.0516
CONTROL	ENSMUSG00000020248	32.8198	19.372	34.3635	20.3464	39.5505	21.7957
CONTROL	ENSMUSG00000020250	88.5553	47.9693	65.5898	51.0335	69.105	77.1842
CONTROL	ENSMUSG00000020253	15.4303	9.00965	21.6862	9.89457	20.7626	10.6912
CONTROL	ENSMUSG00000020257	8.95512	6.06048	10.9622	6.51285	10.7321	4.7775
CONTROL	ENSMUSG00000020260	5.13857	4.7972	4.63138	5.44578	4.80298	5.26475
CONTROL	ENSMUSG00000020265	153.878	140.786	185.893	145.649	163.564	177.526
CONTROL	ENSMUSG00000020267	891.301	563.433	1060.71	685.367	916.349	398.444
UP	ENSMUSG00000020277	7.94274	7.71284	8.22811	9.65184	11.4181	15.594
CONTROL	ENSMUSG00000020287	8.25428	8.84968	8.17023	11.4626	8.52645	9.84321
CONTROL	ENSMUSG00000020290	37.7026	19.4896	60.3181	26.4795	38.7639	52.4582
DOWN	ENSMUSG00000020307	172.497	252.726	205.875	248.046	209.213	186.377
CONTROL	ENSMUSG00000020308	21.9903	41.1237	21.8172	35.7312	16.8046	37.7985
UP	ENSMUSG00000020315	13.6351	9.07355	15.9596	12.1757	13.8459	22.3276
CONTROL	ENSMUSG00000020321	28.4028	20.8944	34.4938	21.9297	31.5239	30.2862
CONTROL	ENSMUSG00000020326	13.1039	9.25744	16.2979	10.1366	18.2941	9.22393
DOWN	ENSMUSG00000020328	75.8558	64.1166	86.1034	54.6429	79.3664	22.0334
CONTROL	ENSMUSG00000020329	49.7355	55.9957	39.9467	59.4694	35.5325	54.8106
DOWN	ENSMUSG00000020330	34.0197	20.147	34.5016	16.427	29.1227	11.823
CONTROL	ENSMUSG00000020349	13.6116	10.6224	14.1526	9.95607	15.6889	9.0288
DOWN	ENSMUSG00000020358	216.183	164.737	222.828	131.505	214.526	105.622
CONTROL	ENSMUSG00000020362	7.39449	4.51338	7.73203	4.55286	8.51508	5.22386
CONTROL	ENSMUSG00000020368	355.555	259.859	405.845	346.511	285.199	487.142
CONTROL	ENSMUSG00000020372	1049.6	765.293	1088.19	738.175	1145.94	762.901
CONTROL	ENSMUSG00000020380	24.5877	13.2872	16.4421	10.8672	21.5805	26.7489
CONTROL	ENSMUSG00000020385	9.03704	5.28596	8.32698	4.17138	9.50671	4.25983
CONTROL	ENSMUSG00000020386	3.25636	5.10951	3.57394	4.39807	4.13878	3.59837
CONTROL	ENSMUSG00000020390	16.6287	14.3668	18.0734	11.8079	18.8672	10.4622
CONTROL	ENSMUSG00000020392	22.9844	22.9158	23.2759	20.3225	19.7074	20.8112
CONTROL	ENSMUSG00000020396	1.78872	5.10768	1.02324	3.46801	1.98926	5.24057
UP	ENSMUSG00000020400	42.127	7.45509	39.531	12.2579	34.9091	46.2186
DOWN	ENSMUSG00000020402	252.431	125.942	252.602	112.979	184.296	55.1657
CONTROL	ENSMUSG00000020409	12.492	13.1319	14.397	10.9942	14.3618	8.52857
CONTROL	ENSMUSG00000020419	3.79243	6.81037	5.37386	3.96899	7.89532	3.62783
DOWN	ENSMUSG00000020422	4.94423	6.95371	7.00345	5.37388	5.67434	2.36937
DOWN	ENSMUSG00000020424	6.28781	11.0885	3.33165	6.96547	3.26727	2.01365
CONTROL	ENSMUSG00000020430	23.8009	25.3636	26.0105	28.5084	21.5104	33.3011
UP	ENSMUSG00000020432	1.21586	0.884092	2.12815	1.27821	1.91878	5.8896
UP	ENSMUSG00000020439	13.6418	8.20375	19.3095	9.0722	16.8695	27.8422
UP	ENSMUSG00000020440	134.735	87.083	224.49	124.527	153.917	273.792
CONTROL	ENSMUSG00000020441	66.5765	58.7182	82.1742	65.6579	64.585	64.8351
CONTROL	ENSMUSG00000020444	94.9369	87.7602	79.3244	71.9929	91.9384	84.6508
CONTROL	ENSMUSG00000020448	5.29916	5.08968	6.91991	3.68395	6.59812	5.14792
UP	ENSMUSG00000020451	10.4706	12.026	7.84237	9.85948	13.1711	21.3679
DOWN	ENSMUSG00000020453	38.6637	18.858	45.2846	16.878	46.3697	11.5779
CONTROL	ENSMUSG00000020454	56.7421	30.2915	76.5567	33.8521	67.4241	62.5457
CONTROL	ENSMUSG00000020455	14.228	11.7324	19.2786	12.5607	17.4044	8.53598
CONTROL	ENSMUSG00000020456	16.7126	11.5368	18.0269	10.0019	16.5747	9.03359
CONTROL	ENSMUSG00000020457	32.5838	25.3784	37.2256	27.596	32.6459	25.4924
CONTROL	ENSMUSG00000020458	29.1559	20.4473	32.436	22.5307	29.7714	22.4282
CONTROL	ENSMUSG00000020459	8.85091	5.95293	8.78429	5.76491	7.77554	4.53274
CONTROL	ENSMUSG00000020462	15.9452	12.1335	15.0325	11.0545	14.6425	10.9853
CONTROL	ENSMUSG00000020476	15.0809	18.9546	19.3817	21.5993	16.6571	23.395
CONTROL	ENSMUSG00000020477	71.1591	66.2853	100.382	72.4596	88.0911	85.8641
DOWN	ENSMUSG00000020482	6.48757	5.93565	7.91393	5.49837	5.05402	1.72047
CONTROL	ENSMUSG00000020483	74.7299	47.715	72.529	42.8092	82.2439	49.9507
CONTROL	ENSMUSG00000020485	137.196	95.7551	150.984	99.0209	132.28	109.449
CONTROL	ENSMUSG00000020492	10.2926	6.74373	16.742	5.5615	11.356	5.45048
DOWN	ENSMUSG00000020495	2.98378	5.55077	4.27496	3.62503	5.30065	0.465245
CONTROL	ENSMUSG00000020496	98.151	80.009	166.954	114.458	107.953	100.495
DOWN	ENSMUSG00000020515	12.7132	15.9118	12.9295	11.8904	14.0629	8.33306
CONTROL	ENSMUSG00000020516	27.5416	15.5238	36.5485	19.9365	26.433	37.5199
UP	ENSMUSG00000020519	30.4121	34.2671	50.2501	50.8323	31.9958	96.8217
UP	ENSMUSG00000020522	6.86007	4.6803	7.96019	4.74522	7.67926	10.1602
CONTROL	ENSMUSG00000020523	20.8257	20.3008	24.242	17.7965	24.2856	18.8469
DOWN	ENSMUSG00000020526	18.6954	19.1756	22.3122	14.9629	15.5562	9.43024
DOWN	ENSMUSG00000020528	4.611	7.38962	4.7407	4.87825	8.00937	2.27943
UP	ENSMUSG00000020530	85.4308	56.7231	82.3237	69.7948	104.895	53.0097
DOWN	ENSMUSG00000020534	44.2456	28.2436	40.5475	27.1311	44.7533	19.7912
DOWN	ENSMUSG00000020536	13.3596	22.8407	12.694	13.6707	21.1901	4.01994
CONTROL	ENSMUSG00000020537	10.2518	13.6252	11.2674	10.487	8.27519	12.0816
CONTROL	ENSMUSG00000020547	83.4834	77.1644	92.909	79.4467	104.441	79.3023
CONTROL	ENSMUSG00000020549	5.89948	6.17036	5.33369	5.4705	6.51821	6.54585
CONTROL	ENSMUSG00000020561	17.7548	12.978	22.8415	14.5247	18.3926	16.2723
DOWN	ENSMUSG00000020572	15.0658	10.1212	14.1716	7.47645	16.1988	11.973
CONTROL	ENSMUSG00000020577	7.22917	5.42131	10.5812	5.93812	12.0611	6.46441
UP	ENSMUSG00000020580	16.0238	8.81968	17.3281	9.15061	17.6245	23.9051
CONTROL	ENSMUSG00000020585	97.5288	88.7775	105.347	85.7484	121.924	65.5053
CONTROL	ENSMUSG00000020608	29.0023	19.5217	37.5843	21.812	28.1679	18.5982
CONTROL	ENSMUSG00000020610	21.3544	13.2848	27.4136	16.498	16.3329	16.4308
CONTROL	ENSMUSG00000020611	10.8721	7.58995	14.5977	7.56223	9.7442	9.16079
CONTROL	ENSMUSG00000020612	11.6374	13.5318	12.4251	14.6178	16.1486	18.0729
DOWN	ENSMUSG00000020630	3.50579	10.3203	2.72193	5.06865	5.04607	0.289902
CONTROL	ENSMUSG00000020634	17.9244	9.76947	22.9534	9.20584	19.9192	9.57708
UP	ENSMUSG00000020635	3.01215	1.50484	4.60751	2.29769	4.87935	6.57109
CONTROL	ENSMUSG00000020640	15.4043	10.9406	16.8571	10.5784	14.4344	14.5318
CONTROL	ENSMUSG00000020648	7.65707	7.07567	5.17248	8.01164	3.38818	5.95653
DOWN	ENSMUSG00000020649	36.7332	28.2471	36.5011	22.2844	32.0687	7.52072
CONTROL	ENSMUSG00000020659	17.1078	9.86297	18.8433	9.71659	17.1591	13.1921
UP	ENSMUSG00000020661	2.32475	2.01918	4.69	4.75788	5.84027	5.98615
CONTROL	ENSMUSG00000020671	24.3646	18.5753	27.6952	18.3911	32.6973	20.3479
CONTROL	ENSMUSG00000020677	25.0647	18.1645	27.5509	16.0604	25.9012	18.0285
CONTROL	ENSMUSG00000020680	36.208	31.3528	48.0351	29.917	48.8353	19.8829
CONTROL	ENSMUSG00000020692	14.038	17.6783	14.9997	18.3921	16.5508	32.7761
CONTROL	ENSMUSG00000020694	63.3899	29.6883	98.2072	48.9348	50.0124	28.5262
CONTROL	ENSMUSG00000020697	18.3431	15.0723	15.9584	10.6348	20.9028	5.95906
UP	ENSMUSG00000020700	4.75611	2.49324	6.24763	3.93475	6.19155	7.69182
CONTROL	ENSMUSG00000020705	16.4454	9.23576	21.7438	8.76978	15.8028	10.8244
CONTROL	ENSMUSG00000020706	79.5959	49.926	82.1474	52.2482	65.6824	75.9326
DOWN	ENSMUSG00000020719	67.8892	43.674	63.35	37.6369	57.5887	31.6416
CONTROL	ENSMUSG00000020720	71.0129	49.2571	80.849	45.0467	79.0696	45.3487
CONTROL	ENSMUSG00000020737	117.673	79.9205	113.695	74.2254	115.344	96.9539
DOWN	ENSMUSG00000020738	223.408	197.581	225.636	159.467	247.129	117.866
DOWN	ENSMUSG00000020739	13.8506	22.3968	12.9704	19.8843	14.5956	9.44642
CONTROL	ENSMUSG00000020740	7.50489	5.43734	7.45135	5.0377	7.53881	6.19664
CONTROL	ENSMUSG00000020741	23.6144	13.4696	25.3363	14.2022	20.5984	13.8627
DOWN	ENSMUSG00000020743	96.0858	65.9944	93.3713	40.135	101.268	20.5316
CONTROL	ENSMUSG00000020744	6.41357	6.37887	6.81458	6.60595	6.68872	5.6792
CONTROL	ENSMUSG00000020745	24.2698	10.9901	22.5926	12.0496	22.916	11.3707
CONTROL	ENSMUSG00000020752	9.76837	7.87672	10.7871	9.13071	6.98597	11.5747
CONTROL	ENSMUSG00000020755	10.4386	9.36378	9.98076	8.01485	7.05294	5.92591
UP	ENSMUSG00000020766	15.6992	55.0233	26.2849	78.9692	24.5882	148.313
CONTROL	ENSMUSG00000020775	53.4064	63.4064	65.6267	61.5276	67.6498	65.6331
UP	ENSMUSG00000020778	21.6604	14.7545	21.0939	18.0881	28.0454	39.2668
CONTROL	ENSMUSG00000020780	38.0579	24.9503	45.6989	29.7033	45.4828	33.6719
CONTROL	ENSMUSG00000020782	23.8473	20.5702	19.8807	14.1246	33.8654	21.2754
CONTROL	ENSMUSG00000020792	5.24751	4.2406	6.07552	5.15364	5.74322	7.46387
CONTROL	ENSMUSG00000020802	8.19484	6.53174	8.81586	6.47562	11.6129	8.63118
DOWN	ENSMUSG00000020803	134.531	69.4398	150.6	58.8643	128.408	31.6622
CONTROL	ENSMUSG00000020808	55.604	23.4113	39.0752	20.3588	57.4083	21.5368
DOWN	ENSMUSG00000020818	6.11887	6.14146	6.20549	4.37341	4.99129	3.04652
CONTROL	ENSMUSG00000020821	8.45485	5.8187	9.56091	6.66578	10.1242	8.51753
UP	ENSMUSG00000020827	3.12907	1.90749	4.34824	2.59538	3.82896	5.41463
CONTROL	ENSMUSG00000020829	4.03749	3.79717	3.76032	4.45641	4.25326	8.17993
CONTROL	ENSMUSG00000020832	7.69947	5.29621	8.28898	5.55547	9.08845	8.83047
CONTROL	ENSMUSG00000020834	1.54567	5.08267	1.90412	5.54843	2.10463	5.86845
UP	ENSMUSG00000020840	41.2447	29.0255	50.042	33.7405	47.1735	73.9673
UP	ENSMUSG00000020843	168.652	129.109	183.986	157.851	155.698	266.769
CONTROL	ENSMUSG00000020849	895.253	513.146	1131.86	602.177	906.551	752.984
DOWN	ENSMUSG00000020850	5.91053	6.9943	6.59442	5.87036	6.66653	3.87898
DOWN	ENSMUSG00000020857	1581.09	1016.91	1520.29	1040.05	1702.1	760.724
CONTROL	ENSMUSG00000020863	159.277	189.736	199.685	160.826	250.926	103.062
CONTROL	ENSMUSG00000020864	9.39419	10.0707	12.6931	13.0372	6.90655	12.4972
CONTROL	ENSMUSG00000020869	39.5888	29.2159	47.4257	33.3747	37.825	47.9707
CONTROL	ENSMUSG00000020873	81.3866	46.5392	67.1934	39.7669	84.683	68.0724
CONTROL	ENSMUSG00000020876	3.48451	6.36663	5.0447	5.78802	3.77625	7.96237
UP	ENSMUSG00000020877	6.5812	6.83892	13.2542	12.169	8.83744	17.9758
UP	ENSMUSG00000020882	1.81393	1.3395	2.42529	1.3842	1.95088	7.88442
CONTROL	ENSMUSG00000020888	29.4853	18.0836	36.3167	18.7167	33.1956	24.2099
UP	ENSMUSG00000020894	2.44243	2.45282	3.61354	2.77657	4.49136	10.6526
DOWN	ENSMUSG00000020895	10.6333	17.2129	16.4072	14.3104	14.975	1.51352
DOWN	ENSMUSG00000020897	10.5602	11.0175	12.557	8.24071	13.14	10.5542
CONTROL	ENSMUSG00000020898	8.82446	3.94491	10.0904	5.28408	9.04005	5.76126
CONTROL	ENSMUSG00000020899	12.0849	10.3111	12.6851	8.88319	12.2839	7.42992
UP	ENSMUSG00000020900	1.92923	1.97683	3.11852	2.64636	4.33298	5.22145
DOWN	ENSMUSG00000020902	5.01864	10.661	4.98216	9.18358	5.48731	1.81348
CONTROL	ENSMUSG00000020914	174.161	114.429	247.376	130.249	173.448	185.301
CONTROL	ENSMUSG00000020917	41.6241	29.7316	55.2884	29.507	63.5628	32.8498
CONTROL	ENSMUSG00000020921	8.75545	13.9572	11.5143	12.3511	7.70234	11.0864
CONTROL	ENSMUSG00000020922	29.9478	18.1846	35.8055	20.1938	39.1675	30.0896
CONTROL	ENSMUSG00000020923	26.6596	23.588	30.5493	25.7591	25.0289	30.2955
CONTROL	ENSMUSG00000020925	16.2255	8.57527	23.066	9.81535	17.0939	10.3282
CONTROL	ENSMUSG00000020935	61.5595	51.9248	66.9833	57.9188	81.1562	73.4981
UP	ENSMUSG00000020936	18.3797	28.6704	20.6852	34.2844	18.8722	61.1
CONTROL	ENSMUSG00000020946	4.66337	3.88446	5.80679	5.84951	4.07442	8.97047
CONTROL	ENSMUSG00000020952	12.8314	8.52503	13.0517	6.97706	15.5855	8.81412
UP	ENSMUSG00000020954	20.8052	13.7099	25.4891	14.9862	26.6889	27.2948
CONTROL	ENSMUSG00000020955	13.8949	9.59174	13.8868	8.74222	16.8435	9.25463
CONTROL	ENSMUSG00000020962	7.48529	5.01279	8.89624	4.9389	6.13863	8.21154
UP	ENSMUSG00000020964	3.35253	2.27637	4.22535	2.898	3.65559	6.08499
CONTROL	ENSMUSG00000020973	10.744	7.5343	13.8046	7.13952	13.4341	7.23992
UP	ENSMUSG00000020978	14.2657	8.83139	23.4737	15.723	24.1227	32.5771
CONTROL	ENSMUSG00000020994	26.2467	17.1878	31.5783	16.8709	27.1902	16.5318
CONTROL	ENSMUSG00000021000	50.0236	18.9928	58.9459	18.5058	34.7235	19.8004
CONTROL	ENSMUSG00000021012	6.47452	5.97801	8.04645	5.89517	8.3189	5.08041
DOWN	ENSMUSG00000021018	73.3945	51.1727	74.5722	39.0501	106.46	9.06336
UP	ENSMUSG00000021022	4.07193	4.38077	3.56396	4.66885	2.92473	9.70855
CONTROL	ENSMUSG00000021024	115.402	85.9186	111.352	79.4003	122.121	91.2826
DOWN	ENSMUSG00000021025	97.7104	30.4098	88.7446	23.1898	44.0165	7.57906
CONTROL	ENSMUSG00000021033	7.49443	3.82915	10.6766	4.33178	8.78895	5.01549
CONTROL	ENSMUSG00000021036	9.83413	13.0447	3.82078	11.218	16.3718	3.37843
CONTROL	ENSMUSG00000021038	24.1639	13.2081	21.3672	13.1931	16.3628	16.4609
CONTROL	ENSMUSG00000021039	45.9561	32.2098	54.0879	30.8851	50.1657	40.9657
DOWN	ENSMUSG00000021040	52.7738	58.1455	52.9974	43.0197	90.2062	17.1889
CONTROL	ENSMUSG00000021044	6.85428	5.78128	5.84347	4.30048	6.82201	6.40187
DOWN	ENSMUSG00000021048	18.0695	14.1888	21.0885	12.7329	26.5177	5.1417
DOWN	ENSMUSG00000021079	122.042	115.178	127.27	98.3732	142.946	54.818
CONTROL	ENSMUSG00000021096	8.24347	7.03848	12.1571	7.83181	7.66163	7.59619
UP	ENSMUSG00000021097	7.03423	2.07684	12.4187	4.80521	13.432	12.2315
CONTROL	ENSMUSG00000021102	15.4748	12.8981	16.9369	14.4316	21.2686	12.949
CONTROL	ENSMUSG00000021103	19.2893	13.0368	18.8848	11.8594	21.795	16.3299
CONTROL	ENSMUSG00000021111	260.404	142.793	261.322	153.057	305.609	74.5421
UP	ENSMUSG00000021112	4.65701	2.753	6.7352	3.3515	4.8815	5.15148
CONTROL	ENSMUSG00000021114	26.7189	15.8616	35.0952	13.5682	28.4178	28.9223
CONTROL	ENSMUSG00000021115	20.37	14.609	18.5325	9.39183	20.2535	9.3753
DOWN	ENSMUSG00000021116	20.6031	23.3621	20.1661	15.3004	24.3741	7.37979
CONTROL	ENSMUSG00000021124	33.449	19.4723	48.285	21.9	40.6778	37.6171
DOWN	ENSMUSG00000021127	18.6115	17.2755	23.9807	16.5531	20.4531	9.96817
CONTROL	ENSMUSG00000021131	211.692	120.217	233.934	128.881	221.094	120.194
CONTROL	ENSMUSG00000021134	55.794	63.6731	67.3055	55.3172	57.8334	63.5508
DOWN	ENSMUSG00000021139	17.0145	21.8545	26.5196	16.0158	23.8964	8.67139
UP	ENSMUSG00000021143	2.59781	1.69909	3.85746	2.69449	3.82838	5.165
DOWN	ENSMUSG00000021144	3.08628	8.96132	2.91481	8.92626	5.11355	2.12988
CONTROL	ENSMUSG00000021149	194.222	145.509	212.783	148.994	201.245	267.992
CONTROL	ENSMUSG00000021156	7.35286	6.09401	8.20703	18.272	8.78916	13.3585
CONTROL	ENSMUSG00000021175	8.39254	6.28103	16.7947	9.2346	13.7016	7.86335
UP	ENSMUSG00000021178	899.352	618.978	951.919	643.762	801.395	1564.79
CONTROL	ENSMUSG00000021179	20.2829	20.8408	20.1927	21.6339	18.7223	25.1751
UP	ENSMUSG00000021182	23.2036	10.9776	30.9256	13.8585	23.4426	30.1447
UP	ENSMUSG00000021188	3.76926	2.35026	4.64749	2.90888	3.76282	5.82609
CONTROL	ENSMUSG00000021193	12.2234	10.9728	11.9542	9.61798	13.5743	11.2744
CONTROL	ENSMUSG00000021194	1.38372	7.08177	0.952493	3.32682	2.9444	10.8757
CONTROL	ENSMUSG00000021196	22.6913	13.1074	21.7834	16.076	10.8023	15.0638
DOWN	ENSMUSG00000021215	3.96129	5.5781	4.56734	3.38664	3.71633	4.34383
DOWN	ENSMUSG00000021222	9.46405	11.6331	8.23797	9.57599	13.8261	7.21432
UP	ENSMUSG00000021226	5.46177	5.79329	9.11839	6.3422	12.8057	28.0913
CONTROL	ENSMUSG00000021240	4.27223	6.93542	5.28071	6.28503	3.02363	9.76966
CONTROL	ENSMUSG00000021241	17.674	13.8601	17.2975	10.7667	17.0885	11.211
CONTROL	ENSMUSG00000021244	26.1373	21.9663	32.891	21.5934	25.2908	27.976
DOWN	ENSMUSG00000021245	7.34028	7.83735	6.81188	5.52794	7.02151	3.06111
CONTROL	ENSMUSG00000021248	33.6054	16.5296	35.7351	19.4108	26.2753	23.3027
CONTROL	ENSMUSG00000021252	42.8631	43.9067	60.7828	47.4384	61.787	57.4223
DOWN	ENSMUSG00000021255	64.2122	25.3997	75.6128	27.9216	69.0122	15.0556
UP	ENSMUSG00000021262	3.13877	12.8052	7.08714	20.6121	4.79641	38.2937
CONTROL	ENSMUSG00000021264	44.0867	20.972	50.2966	31.4599	39.5016	51.0565
CONTROL	ENSMUSG00000021266	4.39328	6.92443	4.40787	5.838	4.84471	7.02377
CONTROL	ENSMUSG00000021270	4283.28	2471.22	4255.05	1929.83	3409.27	2417.56
UP	ENSMUSG00000021271	3.43795	2.38221	3.97446	2.62741	2.80815	5.66465
CONTROL	ENSMUSG00000021273	25.0898	36.8407	26.5802	34.9065	30.7526	40.9267
CONTROL	ENSMUSG00000021276	23.3457	18.2486	24.4349	18.1546	25.4876	36.7338
UP	ENSMUSG00000021278	0	0.268599	1.06287	0.490676	0.754706	6.68885
CONTROL	ENSMUSG00000021279	20.2476	11.1418	32.4395	11.0152	27.6376	7.2679
CONTROL	ENSMUSG00000021282	179.407	158.413	188.702	139.209	187.734	180.695
CONTROL	ENSMUSG00000021286	23.1972	15.5787	18.5808	13.3586	42.4194	8.0575
CONTROL	ENSMUSG00000021288	12.9828	11.1865	14.3026	9.08212	16.3913	8.64193
UP	ENSMUSG00000021302	8.43527	17.5552	6.40822	19.5622	8.62803	25.9874
DOWN	ENSMUSG00000021326	17.8531	15.2077	18.4043	15.1628	19.5459	9.78661
CONTROL	ENSMUSG00000021360	8.79366	7.63887	12.3125	7.89771	9.58556	6.24596
CONTROL	ENSMUSG00000021361	179.659	104.377	236.39	131.236	266.117	144.854
CONTROL	ENSMUSG00000021368	14.9509	22.1001	11.9141	17.6897	20.5056	23.4058
DOWN	ENSMUSG00000021374	12.7723	7.52144	13.1449	7.01397	13.1784	4.13806
CONTROL	ENSMUSG00000021375	11.1205	6.04825	7.57409	6.45659	8.22784	7.11427
DOWN	ENSMUSG00000021391	18.4276	16.6797	16.3106	11.2153	22.1105	7.69773
CONTROL	ENSMUSG00000021392	49.5448	31.0934	46.3101	22.7337	48.1642	21.2521
DOWN	ENSMUSG00000021395	4.25551	6.08846	5.04154	4.00622	4.4323	0.771209
DOWN	ENSMUSG00000021400	3.54665	5.76987	3.43418	4.36836	2.85306	2.18814
CONTROL	ENSMUSG00000021420	4.13143	10.7786	5.82423	14.5067	2.71439	17.1218
CONTROL	ENSMUSG00000021427	5.7764	4.01109	7.56475	4.14456	5.9131	5.46554
CONTROL	ENSMUSG00000021428	26.1857	21.0368	26.6149	23.061	21.6142	30.9763
CONTROL	ENSMUSG00000021431	65.7503	75.4749	87.2021	55.0648	76.096	65.5581
CONTROL	ENSMUSG00000021468	14.8131	9.92465	15.3206	9.67424	15.3275	12.1555
UP	ENSMUSG00000021474	37.8971	35.6729	37.85	42.2807	56.5411	65.487
UP	ENSMUSG00000021476	1.0125	0.682853	2.00728	2.0215	1.96425	6.99853
DOWN	ENSMUSG00000021477	21.8659	15.0074	25.2393	12.6112	21.9974	7.22055
DOWN	ENSMUSG00000021484	71.8516	140.853	55.094	101.342	62.6525	34.0161
CONTROL	ENSMUSG00000021486	64.0718	92.2711	68.2983	104.319	66.5317	92.1584
CONTROL	ENSMUSG00000021488	22.8274	17.442	41.9461	18.9511	29.9946	26.3466
UP	ENSMUSG00000021493	4.09733	7.58148	3.54972	7.94327	8.04216	35.2633
CONTROL	ENSMUSG00000021494	9.24309	18.3311	9.79468	15.5335	5.83956	29.8187
CONTROL	ENSMUSG00000021495	25.864	28.0826	29.415	26.7419	26.9759	22.0672
UP	ENSMUSG00000021496	15.7183	10.7961	19.9516	15.8907	22.9814	26.6772
CONTROL	ENSMUSG00000021497	9.14529	9.03719	11.6595	9.31603	8.84924	10.2621
CONTROL	ENSMUSG00000021500	21.0957	16.848	22.1517	15.1807	23.309	21.4531
CONTROL	ENSMUSG00000021501	7.49787	5.2982	7.75958	4.24589	4.84973	4.10273
CONTROL	ENSMUSG00000021514	3.64534	5.65281	4.14721	5.08669	4.49202	3.63886
CONTROL	ENSMUSG00000021518	13.0791	9.31783	19.036	11.846	9.1484	7.58077
UP	ENSMUSG00000021537	335.67	221.055	503.577	304.944	322.709	516.134
UP	ENSMUSG00000021540	3.67917	1.67539	5.53824	2.65166	4.84916	5.73262
CONTROL	ENSMUSG00000021546	192.822	115.37	203.935	126.309	215.878	103.932
DOWN	ENSMUSG00000021548	92.2072	74.7285	90.3467	52.9253	117.771	22.2919
UP	ENSMUSG00000021549	51.2875	23.873	69.2054	35.7318	47.872	67.5323
UP	ENSMUSG00000021552	27.9644	17.1112	49.4189	23.88	36.7751	36.2171
CONTROL	ENSMUSG00000021555	26.6399	16.9229	28.9817	18.8425	24.48	34.7504
CONTROL	ENSMUSG00000021557	74.6379	18.7266	24.2997	9.82157	40.5347	3.25642
DOWN	ENSMUSG00000021576	20.2083	21.8232	22.3838	14.9837	21.4605	8.37526
CONTROL	ENSMUSG00000021577	40.9636	23.8628	39.0828	25.8096	40.6688	18.5961
CONTROL	ENSMUSG00000021578	17.8867	5.68644	21.7148	7.26889	18.5322	15.7771
DOWN	ENSMUSG00000021598	62.4106	50.5074	60.8203	38.6762	72.7675	19.0418
CONTROL	ENSMUSG00000021606	183.868	229.839	202.747	242.495	166.943	330.414
CONTROL	ENSMUSG00000021608	11.2998	12.7777	12.5074	13.0553	10.9699	14.9079
CONTROL	ENSMUSG00000021621	12.2514	7.68008	11.9759	10.0767	8.58581	13.6751
DOWN	ENSMUSG00000021639	26.3574	19.9402	27.4378	18.1862	33.842	12.0691
CONTROL	ENSMUSG00000021643	4.46881	6.80277	5.24494	7.13479	4.88138	6.498
CONTROL	ENSMUSG00000021650	18.4141	15.3588	15.2772	14.8683	15.4825	13.6167
DOWN	ENSMUSG00000021660	155.477	245.25	150.899	225.397	187.864	140.112
CONTROL	ENSMUSG00000021661	10.2839	6.76537	10.7072	7.19667	11.0555	9.51725
CONTROL	ENSMUSG00000021666	20.48	9.44396	19.6283	10.3926	19.019	15.7602
CONTROL	ENSMUSG00000021670	17.7151	16.3408	18.4257	12.9761	24.0137	20.5827
DOWN	ENSMUSG00000021671	7.56096	8.56726	4.19006	3.86372	3.56601	1.72313
CONTROL	ENSMUSG00000021678	5.08185	8.05854	7.16465	6.63281	8.58171	8.26951
CONTROL	ENSMUSG00000021681	29.8306	20.5201	33.8527	19.0818	28.4404	21.5248
DOWN	ENSMUSG00000021707	7.89059	6.39524	9.39	5.67864	7.27247	3.40552
DOWN	ENSMUSG00000021710	12.1557	13.646	12.7005	11.0785	10.6612	8.57922
CONTROL	ENSMUSG00000021713	13.4339	11.0794	15.1795	11.1777	10.761	16.2978
DOWN	ENSMUSG00000021714	19.0438	9.88228	15.08	11.1323	13.73	5.28563
DOWN	ENSMUSG00000021715	16.3017	11.8854	15.6712	8.95307	14.1098	6.3867
CONTROL	ENSMUSG00000021716	22.9072	15.7019	42.0089	18.5226	19.1464	14.2267
UP	ENSMUSG00000021733	5.93172	3.70295	8.99484	6.07036	6.41773	15.7153
CONTROL	ENSMUSG00000021737	93.0944	58.9093	109.046	72.1259	87.4141	109.54
DOWN	ENSMUSG00000021748	51.2869	49.0566	48.4309	35.2399	45.4649	27.9899
DOWN	ENSMUSG00000021752	6.84617	7.36558	6.35202	3.54342	7.27581	2.33859
UP	ENSMUSG00000021760	1.37554	0.982555	2.69484	2.31755	5.17949	21.8703
CONTROL	ENSMUSG00000021764	92.8838	48.2533	129.137	55.9293	94.2173	63.3982
DOWN	ENSMUSG00000021765	0.662395	13.8955	3.87825	9.75138	0.273847	0.276672
CONTROL	ENSMUSG00000021767	10.9185	7.40379	12.9809	7.64727	10.1333	6.50691
CONTROL	ENSMUSG00000021771	107.954	67.0993	109.255	61.3412	131.575	47.2312
CONTROL	ENSMUSG00000021773	15.0542	8.08061	22.2105	12.3319	18.5003	12.767
CONTROL	ENSMUSG00000021774	9.08108	6.90593	18.057	13.8604	9.95303	11.99
UP	ENSMUSG00000021782	13.5264	6.73183	16.0134	9.59238	14.0477	16.0624
CONTROL	ENSMUSG00000021792	10.413	3.40865	13.8838	6.24087	9.8088	9.72298
DOWN	ENSMUSG00000021807	56.7041	47.9118	61.5734	38.8415	74.0582	19.3921
CONTROL	ENSMUSG00000021810	26.8948	22.7696	30.6843	25.0224	27.0788	22.8769
DOWN	ENSMUSG00000021811	75.3788	47.9949	84.5183	46.9029	90.9161	29.6962
CONTROL	ENSMUSG00000021814	6.47601	4.56375	7.31603	4.86981	9.30225	5.38451
CONTROL	ENSMUSG00000021832	136.556	45.919	152.865	57.8534	143.318	53.5337
CONTROL	ENSMUSG00000021835	9.81821	59.5344	13.5474	37.1358	12.3714	58.0619
UP	ENSMUSG00000021843	38.4955	23.273	45.8207	28.4915	43.0527	26.2818
CONTROL	ENSMUSG00000021866	2.37222	4.4872	2.83134	4.54464	3.71315	5.74751
DOWN	ENSMUSG00000021868	29.1608	29.2493	32.0271	18.9384	42.6055	9.14775
CONTROL	ENSMUSG00000021870	52.8681	34.8509	62.6193	35.5529	56.7933	38.5657
UP	ENSMUSG00000021891	10.0947	11.5454	8.11652	9.46025	11.2184	9.90312
DOWN	ENSMUSG00000021901	7.05628	5.52698	6.67606	5.04255	6.08932	3.73669
DOWN	ENSMUSG00000021905	68.3296	41.4788	54.3237	28.3373	88.0475	11.1111
CONTROL	ENSMUSG00000021910	19.8822	15.7235	23.384	19.1442	19.7327	26.0784
CONTROL	ENSMUSG00000021913	12.0492	6.17352	14.2385	8.08496	11.0737	7.32272
DOWN	ENSMUSG00000021917	38.1438	54.4467	62.2955	49.7784	35.9553	17.6026
UP	ENSMUSG00000021928	6.26474	4.55539	9.77866	6.98568	8.73164	10.9184
CONTROL	ENSMUSG00000021929	27.9744	12.8222	28.735	15.146	25.6358	25.941
DOWN	ENSMUSG00000021932	24.1602	18.2981	19.3972	12.6338	26.6001	7.16736
CONTROL	ENSMUSG00000021938	45.2139	22.4514	69.4104	24.2481	75.8448	23.8747
CONTROL	ENSMUSG00000021952	16.3464	12.1217	15.7072	8.88773	17.7792	14.0103
DOWN	ENSMUSG00000021953	357.725	350.379	367.203	251.745	289.821	96.0528
UP	ENSMUSG00000021957	88.7082	36.1797	128.347	44.39	131.134	93.1389
CONTROL	ENSMUSG00000021958	103.816	75.8402	102.335	88.093	89.7747	111.669
CONTROL	ENSMUSG00000021963	10.6263	8.60946	11.4129	8.59995	17.2374	14.6318
DOWN	ENSMUSG00000021965	5.53259	5.10452	9.09239	4.29548	7.36142	5.48698
UP	ENSMUSG00000021967	6.63697	7.12074	9.82509	8.83638	7.41712	11.6774
CONTROL	ENSMUSG00000021996	21.0626	23.681	27.6319	20.4639	26.4535	17.7832
CONTROL	ENSMUSG00000022000	22.0756	13.3382	24.5049	12.9255	19.0197	18.2669
DOWN	ENSMUSG00000022003	6.58446	6.51362	6.74904	4.41144	9.50163	2.54542
CONTROL	ENSMUSG00000022009	12.8553	7.98363	13.6257	7.55325	11.4095	8.3332
CONTROL	ENSMUSG00000022010	174.78	160.354	210.991	142.029	141.198	126.258
DOWN	ENSMUSG00000022012	2.11689	5.74304	2.9598	3.13139	1.11533	0.94241
CONTROL	ENSMUSG00000022013	2.57968	5.24626	5.62736	3.36085	7.60697	2.46196
DOWN	ENSMUSG00000022019	5.89745	5.67607	9.42564	5.59401	6.98832	1.89048
DOWN	ENSMUSG00000022020	35.2508	25.9893	33.4187	19.9444	31.7832	16.638
CONTROL	ENSMUSG00000022021	33.0549	15.6421	38.397	15.1609	31.0973	15.5746
CONTROL	ENSMUSG00000022024	85.1834	48.0155	83.2952	43.5332	87.7248	20.8938
DOWN	ENSMUSG00000022031	11.9449	28.7031	7.14915	23.9804	7.66924	12.9525
CONTROL	ENSMUSG00000022033	11.8188	6.80518	15.3162	7.62356	12.4736	6.2342
DOWN	ENSMUSG00000022034	15.2492	11.3569	20.2858	10.0257	16.3018	15.2746
CONTROL	ENSMUSG00000022035	70.8538	53.1929	74.0617	42.4024	72.59	42.9437
UP	ENSMUSG00000022037	0.984881	1.91283	1.62098	5.06302	2.7729	24.3417
CONTROL	ENSMUSG00000022051	12.8625	10.3347	16.1343	10.1739	19.028	10.4867
DOWN	ENSMUSG00000022070	5.40408	6.88328	5.93401	4.56661	6.51885	1.42266
CONTROL	ENSMUSG00000022074	3.68226	5.66329	3.86086	5.38186	5.18857	3.85765
UP	ENSMUSG00000022090	1.39558	0.689303	2.14282	1.78309	3.61597	15.6016
UP	ENSMUSG00000022095	13.9462	6.14875	18.9931	8.58183	21.2205	24.2479
DOWN	ENSMUSG00000022099	10.9509	5.66927	11.1983	4.45838	9.80544	2.23802
DOWN	ENSMUSG00000022101	4.98604	6.43795	1.36881	2.22908	5.38996	0.379792
CONTROL	ENSMUSG00000022108	9.86014	7.9732	14.769	9.45244	14.5171	7.48751
CONTROL	ENSMUSG00000022110	12.4381	9.34943	13.5072	9.34064	15.8489	7.94046
DOWN	ENSMUSG00000022111	37.7197	40.4829	46.0338	32.71	66.3654	8.1234
DOWN	ENSMUSG00000022114	7.68208	11.4612	8.62943	7.11757	10.8621	7.07554
CONTROL	ENSMUSG00000022119	26.8558	15.8274	25.0504	15.2848	26.1945	15.9379
DOWN	ENSMUSG00000022125	6.37385	5.31136	4.81095	2.72045	7.09024	1.86674
CONTROL	ENSMUSG00000022136	7.59689	3.75899	8.21828	4.23044	7.7254	5.96221
UP	ENSMUSG00000022139	1.4951	1.03878	2.07121	2.19864	2.10422	17.6332
UP	ENSMUSG00000022141	9.83461	6.14231	12.5361	7.51352	9.67947	10.8476
DOWN	ENSMUSG00000022142	5.71517	5.05333	5.9333	3.4636	5.15242	1.70191
CONTROL	ENSMUSG00000022148	0	33.3645	0.0178732	37.7991	0	9.81532
DOWN	ENSMUSG00000022151	9.88074	8.76539	10.0513	6.83106	8.96232	3.49317
CONTROL	ENSMUSG00000022160	5.45571	8.27848	7.52926	4.99705	7.82794	2.91933
CONTROL	ENSMUSG00000022174	235.527	191.67	309.118	223.284	274.272	290.835
CONTROL	ENSMUSG00000022178	7.5973	9.0855	11.466	10.8953	10.729	11.607
CONTROL	ENSMUSG00000022185	138.615	375.234	136.068	395.918	117.324	531.979
UP	ENSMUSG00000022186	29.7088	18.084	41.147	24.9978	33.8915	24.11
CONTROL	ENSMUSG00000022191	20.23	18.6107	24.4024	19.8005	24.3155	25.5558
DOWN	ENSMUSG00000022194	341.774	393.9	331.045	300.815	470.182	209.495
DOWN	ENSMUSG00000022204	176.501	109.594	177.27	88.5649	225.766	88.2975
UP	ENSMUSG00000022205	1868.76	832.292	2684.97	1186.68	1854.09	3042.91
CONTROL	ENSMUSG00000022210	56.5124	34.5188	48.7666	30.395	57.0361	26.9322
UP	ENSMUSG00000022214	8.50718	6.31417	8.49125	5.13363	8.98455	12.3645
UP	ENSMUSG00000022216	132.979	80.4627	193.797	97.0585	211.742	190.635
UP	ENSMUSG00000022221	14.9371	15.5996	11.6431	13.0314	9.16204	34.5181
CONTROL	ENSMUSG00000022223	19.6919	12.4716	23.8211	17.0678	12.5507	18.2752
CONTROL	ENSMUSG00000022234	111.46	88.3927	115.278	89.4835	121.03	116.201
DOWN	ENSMUSG00000022241	31.7211	35.399	25.7536	22.024	30.775	18.4511
CONTROL	ENSMUSG00000022246	19.6509	11.403	19.3895	11.7596	16.8354	19.8483
DOWN	ENSMUSG00000022247	28.945	23.3383	32.1838	18.5923	34.4255	12.7552
DOWN	ENSMUSG00000022248	17.557	16.7052	17.5616	11.7571	14.7616	3.42398
CONTROL	ENSMUSG00000022255	501.478	344.221	658.908	432.045	602.86	526.966
CONTROL	ENSMUSG00000022257	9.67938	7.23541	7.56343	8.28772	6.67987	10.7054
CONTROL	ENSMUSG00000022283	345.533	338.481	392.848	243.444	456.733	211.536
CONTROL	ENSMUSG00000022285	162.233	57.6989	182.827	76.055	128.789	188.385
CONTROL	ENSMUSG00000022295	5.84099	9.20905	7.65436	7.86901	6.16737	5.78215
CONTROL	ENSMUSG00000022307	6.89295	3.16267	7.82726	4.03362	6.6088	6.58683
UP	ENSMUSG00000022312	120.068	110.712	134.153	111.166	152.083	199.499
CONTROL	ENSMUSG00000022313	39.6076	26.233	47.0713	26.6489	40.9668	43.2287
CONTROL	ENSMUSG00000022314	41.5583	20.7615	53.068	22.9949	37.4243	27.8234
DOWN	ENSMUSG00000022322	10.9836	8.2579	7.46105	5.46751	10.1577	4.62166
DOWN	ENSMUSG00000022323	14.6592	21.4472	14.7183	12.4402	24.4796	3.80431
CONTROL	ENSMUSG00000022325	24.5516	14.9737	22.2287	14.6337	17.1864	21.3228
DOWN	ENSMUSG00000022336	55.2235	64.8177	65.2831	50.7442	86.6162	26.3794
CONTROL	ENSMUSG00000022337	27.0191	13.8224	30.4113	11.6699	36.5489	20.6499
DOWN	ENSMUSG00000022338	89.1984	114.747	136.966	102.383	97.5422	73.786
CONTROL	ENSMUSG00000022339	5.11752	3.57856	7.00708	4.26633	4.28028	5.35074
CONTROL	ENSMUSG00000022350	13.2834	7.78512	12.9415	7.06715	11.8867	5.55546
UP	ENSMUSG00000022351	18.8145	17.0954	21.6845	16.236	26.6206	28.3641
DOWN	ENSMUSG00000022353	56.2532	28.7904	53.11	25.2005	37.8333	34.168
DOWN	ENSMUSG00000022359	14.6911	11.3641	11.4766	6.70902	19.876	3.56826
CONTROL	ENSMUSG00000022360	15.7106	10.4977	17.8991	10.0997	16.268	11.5127
CONTROL	ENSMUSG00000022364	5.42961	4.35283	4.02006	3.19058	4.08421	7.73389
CONTROL	ENSMUSG00000022365	8.48438	7.53837	9.95516	8.42837	9.03289	7.94735
CONTROL	ENSMUSG00000022369	6.90309	17.3403	2.81706	18.2644	7.23016	6.39436
CONTROL	ENSMUSG00000022370	103.334	85.8872	103.373	85.1971	107.582	70.1128
CONTROL	ENSMUSG00000022377	16.9646	16.3238	19.2663	11.1719	24.2558	16.2506
CONTROL	ENSMUSG00000022378	22.2817	16.7549	25.6258	15.3599	24.7759	15.3635
UP	ENSMUSG00000022382	0	0.0227863	0	0.119522	0	6.90113
DOWN	ENSMUSG00000022385	7.54761	29.2671	9.28523	18.6878	11.6002	0.783639
CONTROL	ENSMUSG00000022387	18.406	8.08971	19.2615	11.082	19.6521	9.70625
CONTROL	ENSMUSG00000022389	7.2498	5.69659	9.77471	6.40845	7.41692	7.72363
CONTROL	ENSMUSG00000022391	82.1348	71.4264	81.9594	75.3681	70.5659	77.9788
CONTROL	ENSMUSG00000022394	13.4354	14.5219	12.8597	12.4066	11.9968	17.0954
CONTROL	ENSMUSG00000022400	287.734	230.315	337.033	210.233	313.621	227.758
CONTROL	ENSMUSG00000022403	174.706	93.7105	221.557	109.161	144.193	146.321
CONTROL	ENSMUSG00000022404	6.1748	6.68087	6.59196	5.60151	6.51648	6.68461
CONTROL	ENSMUSG00000022415	56.7361	51.8348	112.251	64.4583	54.5767	76.9505
DOWN	ENSMUSG00000022420	22.1036	19.4269	22.6483	14.6045	18.7298	9.44367
DOWN	ENSMUSG00000022427	59.9552	49.1096	68.2222	38.9866	68.6966	20.7107
CONTROL	ENSMUSG00000022428	20.6277	12.7482	30.7557	13.3543	18.1843	14.7428
UP	ENSMUSG00000022433	7.90721	8.29759	8.59256	10.0221	16.7892	29.7875
CONTROL	ENSMUSG00000022434	19.488	14.4467	20.408	19.7363	15.0432	25.9248
CONTROL	ENSMUSG00000022437	18.8844	30.8838	17.7912	28.8989	22.4304	23.8541
DOWN	ENSMUSG00000022438	3.42641	13.8647	4.31751	6.07919	6.91414	4.94788
UP	ENSMUSG00000022443	21.1049	8.29667	22.6581	11.0096	32.7697	24.9512
CONTROL	ENSMUSG00000022450	298.924	221.29	371.406	235.687	412.228	175.402
CONTROL	ENSMUSG00000022451	23.5832	5.59915	13.5024	5.1728	18.3458	6.15604
UP	ENSMUSG00000022452	111.75	127.224	145.701	156.754	147.33	324.269
DOWN	ENSMUSG00000022462	12.4205	13.7938	11.853	9.90592	8.85208	6.59623
CONTROL	ENSMUSG00000022463	68.9683	47.7869	71.9386	42.8311	74.9094	53.0358
UP	ENSMUSG00000022464	4.64379	2.85289	1.33574	1.51797	18.7174	17.7382
CONTROL	ENSMUSG00000022466	7.2007	5.72487	6.55149	5.717	7.31007	6.89074
CONTROL	ENSMUSG00000022471	29.6175	24.0547	31.2176	22.2006	44.3692	14.6857
UP	ENSMUSG00000022472	9.57365	6.85828	14.4514	10.4161	11.2153	20.6107
CONTROL	ENSMUSG00000022474	129.477	92.1346	159.181	122.945	132.947	127.483
CONTROL	ENSMUSG00000022476	24.3306	17.7171	29.9569	20.0577	22.997	24.5118
DOWN	ENSMUSG00000022477	48.0718	28.4054	49.0768	22.6616	60.7797	15.0197
UP	ENSMUSG00000022500	7.3324	4.9707	8.95804	4.83606	9.00018	8.10083
CONTROL	ENSMUSG00000022503	45.5697	31.8743	51.1069	28.9323	46.1664	34.8255
CONTROL	ENSMUSG00000022515	3.78691	5.49574	4.45218	6.02029	1.75344	4.85215
CONTROL	ENSMUSG00000022517	10.6476	6.55743	17.4236	9.03018	9.20756	9.53438
UP	ENSMUSG00000022521	61.8916	38.0963	73.8132	37.6856	73.1029	37.285
DOWN	ENSMUSG00000022528	30.6648	26.1189	49.0754	24.3964	35.7832	21.7965
CONTROL	ENSMUSG00000022533	11.6525	2.92992	16.366	7.3243	5.94789	9.28357
DOWN	ENSMUSG00000022536	12.7321	14.1432	12.3973	9.18349	16.6163	4.68071
CONTROL	ENSMUSG00000022538	16.0303	16.0358	14.176	15.4319	12.5676	13.155
CONTROL	ENSMUSG00000022540	16.1351	16.9365	27.3985	18.2965	25.5028	12.6481
CONTROL	ENSMUSG00000022544	12.1741	11.6193	16.8277	12.8135	13.1362	9.29486
UP	ENSMUSG00000022550	4.52601	4.74979	8.31362	9.06831	8.34111	12.2406
CONTROL	ENSMUSG00000022551	39.4131	55.6757	40.2225	56.0065	39.1869	50.401
UP	ENSMUSG00000022552	29.1983	37.5571	37.8828	57.779	43.3618	103.235
DOWN	ENSMUSG00000022553	19.6363	26.7062	22.3735	28.5622	19.0187	17.5688
CONTROL	ENSMUSG00000022554	26.039	13.1166	29.3443	15.0275	30.0358	11.1508
CONTROL	ENSMUSG00000022555	5.92416	9.07053	7.08981	11.8267	2.95974	10.6615
DOWN	ENSMUSG00000022556	8.39316	7.54335	9.40244	6.51817	9.8096	3.71901
CONTROL	ENSMUSG00000022557	39.6967	21.7433	38.8333	24.3426	40.4321	27.7497
UP	ENSMUSG00000022558	7.62373	10.3323	16.3682	13.6969	9.32004	34.9963
UP	ENSMUSG00000022564	1.16862	1.2273	2.52793	2.26921	1.76665	5.92254
UP	ENSMUSG00000022565	5.22202	7.01863	4.22682	8.44838	5.43786	16.6619
CONTROL	ENSMUSG00000022568	41.3987	11.105	47.9233	13.1258	44.0962	14.5046
CONTROL	ENSMUSG00000022570	16.065	19.3193	15.2159	20.3311	16.3149	32.2782
CONTROL	ENSMUSG00000022571	2.9352	6.41724	1.54516	6.38859	3.60977	7.04264
UP	ENSMUSG00000022587	13.9771	12.3277	21.4407	16.7244	24.2926	31.3027
UP	ENSMUSG00000022610	0.86686	0.775276	1.03304	1.86489	2.98097	6.83201
CONTROL	ENSMUSG00000022614	10.2729	5.50567	12.4449	7.44746	7.70998	11.7998
CONTROL	ENSMUSG00000022617	22.7672	20.0851	22.6655	18.2322	26.452	16.0671
DOWN	ENSMUSG00000022671	28.2139	34.3751	28.9261	30.0855	21.5486	14.4254
DOWN	ENSMUSG00000022673	22.4768	22.3349	27.3297	15.3511	26.927	6.3264
CONTROL	ENSMUSG00000022674	33.1501	32.5514	44.4415	24.5714	39.8917	30.5854
CONTROL	ENSMUSG00000022677	16.6542	11.8972	17.7408	11.7515	17.2921	19.2458
DOWN	ENSMUSG00000022678	22.2681	19.3304	23.4304	14.9421	24.9499	13.622
CONTROL	ENSMUSG00000022682	28.8843	26.2594	35.3061	29.107	26.6532	34.2883
UP	ENSMUSG00000022683	2.46544	2.61092	3.81805	4.84366	14.4871	7.92427
DOWN	ENSMUSG00000022685	5.71866	8.06461	5.14213	5.51267	7.15817	2.60838
CONTROL	ENSMUSG00000022702	9.692	7.26987	12.0591	9.96616	9.77582	17.0433
CONTROL	ENSMUSG00000022706	36.356	44.0285	34.3249	41.4464	44.8147	34.6075
UP	ENSMUSG00000022711	7.54974	5.27192	8.16389	5.12973	6.56449	16.415
DOWN	ENSMUSG00000022724	7.45761	11.1055	5.43201	8.87478	8.1636	6.8906
DOWN	ENSMUSG00000022742	33.9144	51.1617	23.3869	37.9754	40.4461	18.0158
CONTROL	ENSMUSG00000022748	35.035	27.7257	38.6979	27.9686	44.8861	27.8302
DOWN	ENSMUSG00000022751	13.7583	21.5993	19.5321	17.6792	17.6399	9.4282
DOWN	ENSMUSG00000022752	21.4368	19.1043	22.8029	15.9821	25.2455	7.26024
UP	ENSMUSG00000022760	13.8993	9.88503	22.862	17.9322	14.7065	28.9171
CONTROL	ENSMUSG00000022761	6.46754	3.95875	6.96956	4.2925	6.8996	7.10734
CONTROL	ENSMUSG00000022769	38.2798	32.1848	49.4904	31.8186	73.7859	54.6377
CONTROL	ENSMUSG00000022770	6.09334	6.89603	8.76331	5.11614	11.2579	8.29842
CONTROL	ENSMUSG00000022771	9.29695	9.68081	10.7579	8.32247	12.3776	10.0201
CONTROL	ENSMUSG00000022774	10.0365	10.7424	10.5978	11.5836	12.412	19.1232
UP	ENSMUSG00000022781	14.4852	7.43239	14.4695	7.45472	15.404	12.2421
DOWN	ENSMUSG00000022788	3.83378	5.16392	4.11714	4.08818	6.06944	2.028
DOWN	ENSMUSG00000022792	25.447	27.4648	30.1295	25.8608	22.003	20.9551
DOWN	ENSMUSG00000022797	11.7121	7.49936	11.1288	5.97963	11.3685	3.35833
CONTROL	ENSMUSG00000022800	16.0294	7.11979	17.0367	7.74485	17.5143	17.0579
CONTROL	ENSMUSG00000022801	11.4264	1.95597	11.5917	3.52694	6.36452	7.2011
CONTROL	ENSMUSG00000022808	6.70878	5.0763	9.84452	5.07289	7.88388	3.58311
UP	ENSMUSG00000022812	13.6692	11.1558	18.6113	12.1653	11.1239	24.4004
CONTROL	ENSMUSG00000022814	6.35797	6.4714	8.51703	8.2775	8.01591	5.83489
DOWN	ENSMUSG00000022820	109.99	79.0197	117.579	69.9149	149.765	27.9616
DOWN	ENSMUSG00000022822	5.57374	7.12483	6.33954	5.37587	4.92112	3.17057
CONTROL	ENSMUSG00000022837	7.1099	3.75128	11.589	6.51106	11.1244	7.12212
CONTROL	ENSMUSG00000022841	25.0515	25.8007	22.2019	25.0205	18.6148	22.2559
DOWN	ENSMUSG00000022849	3.00138	6.84191	3.36237	4.88188	4.02742	0.988289
CONTROL	ENSMUSG00000022855	6.96191	5.51983	8.38731	6.13678	7.09901	8.35658
DOWN	ENSMUSG00000022858	100.727	86.2543	96.0097	71.6497	97.5889	89.6905
UP	ENSMUSG00000022863	23.5349	15.175	18.6018	16.2833	35.9549	26.468
CONTROL	ENSMUSG00000022871	11.846	4.44756	13.6148	5.32105	2.48391	5.61753
DOWN	ENSMUSG00000022889	11.1548	16.1531	11.9567	9.96504	12.5134	2.26205
CONTROL	ENSMUSG00000022897	34.997	9.79222	40.9754	12.328	27.4033	25.0366
DOWN	ENSMUSG00000022900	7.16626	5.54987	10.1058	3.57472	6.27267	0.671349
CONTROL	ENSMUSG00000022905	39.0069	24.431	46.2698	26.1027	36.2679	73.3429
DOWN	ENSMUSG00000022913	32.3186	51.9863	36.5821	31.2441	52.5305	11.9101
CONTROL	ENSMUSG00000022945	15.3371	46.5591	15.8355	56.9367	14.4151	90.9133
DOWN	ENSMUSG00000022947	34.0984	41.6592	18.7672	26.043	21.3384	3.26158
CONTROL	ENSMUSG00000022951	2.63751	2.35313	3.14167	2.17684	2.43504	6.40257
UP	ENSMUSG00000022957	6.24167	6.06062	6.54171	6.0051	8.33672	10.281
CONTROL	ENSMUSG00000022961	40.978	29.0619	51.2037	26.8382	52.6619	27.6148
DOWN	ENSMUSG00000022962	51.9592	86.677	53.8319	60.2963	54.2338	39.2593
DOWN	ENSMUSG00000022972	77.1961	53.1524	55.0954	44.3596	66.5853	37.2332
DOWN	ENSMUSG00000022974	8.96496	8.08941	8.52239	7.33943	5.08278	7.48277
DOWN	ENSMUSG00000022978	17.311	16.2874	15.6136	10.5434	18.0894	2.87849
CONTROL	ENSMUSG00000022983	10.7785	7.33832	15.7481	8.81614	15.036	11.2418
DOWN	ENSMUSG00000022992	11.6501	14.0625	11.5518	11.0524	13.4698	5.63704
CONTROL	ENSMUSG00000022995	126.82	45.606	118.25	46.0737	58.267	50.297
DOWN	ENSMUSG00000023004	2997.82	1697.75	3176.98	1706.72	3304.87	854.145
CONTROL	ENSMUSG00000023007	10.1926	13.8923	15.656	14.8272	12.9152	18.0811
UP	ENSMUSG00000023013	0	0.0436063	0	0	0.81488	6.88419
CONTROL	ENSMUSG00000023015	24.7678	15.479	25.5047	14.0581	28.5764	11.5148
CONTROL	ENSMUSG00000023018	22.9581	34.0711	25.6596	66.8138	24.9769	69.6443
UP	ENSMUSG00000023020	19.8305	12.0927	31.845	14.2064	25.5944	19.5704
CONTROL	ENSMUSG00000023021	23.2391	11.8113	28.6423	13.5354	24.1125	18.7013
DOWN	ENSMUSG00000023022	30.5108	15.6493	44.8501	20.4989	27.2283	8.73903
CONTROL	ENSMUSG00000023025	12.9121	9.62889	15.7625	11.849	13.0597	20.8966
CONTROL	ENSMUSG00000023027	8.66222	11.2702	9.1156	9.39737	9.67862	6.97669
UP	ENSMUSG00000023032	1.19897	2.1638	0.243411	2.72211	2.73038	8.90801
CONTROL	ENSMUSG00000023044	11.9628	14.284	15.4303	14.1923	11.3666	18.491
UP	ENSMUSG00000023051	68.834	45.4974	85.6742	44.957	87.0479	84.0439
CONTROL	ENSMUSG00000023055	6.06397	5.28024	11.0679	7.34309	5.63189	8.74527
UP	ENSMUSG00000023067	347.868	74.3357	342.597	131.141	407.895	146.963
DOWN	ENSMUSG00000023068	7.93261	6.39024	8.53412	4.3171	9.1284	2.3935
CONTROL	ENSMUSG00000023072	9.77781	8.46728	12.2154	10.1101	9.26386	7.73811
DOWN	ENSMUSG00000023094	62.7507	23.03	59.7698	21.776	44.4951	9.22319
CONTROL	ENSMUSG00000023106	213.156	257.234	215.394	209.764	248.179	178.201
DOWN	ENSMUSG00000023143	32.3096	30.0072	34.1169	28.6488	23.9161	17.4684
DOWN	ENSMUSG00000023147	7.97886	6.03191	11.1265	6.58916	7.31935	3.12298
CONTROL	ENSMUSG00000023150	14.6254	10.6419	15.7899	10.983	18.3439	9.70355
DOWN	ENSMUSG00000023156	12.3156	14.3618	12.4152	11.7852	12.1637	9.32017
CONTROL	ENSMUSG00000023175	37.5275	75.3893	43.8654	83.219	37.2098	92.4071
CONTROL	ENSMUSG00000023259	7.16868	8.17996	13.0335	9.40021	6.04145	8.98292
CONTROL	ENSMUSG00000023262	26.3174	21.0968	42.1507	23.7157	32.758	25.772
CONTROL	ENSMUSG00000023277	12.1732	21.6657	10.2651	18.5968	19.1095	16.1323
DOWN	ENSMUSG00000023307	18.1554	20.0507	22.9506	18.6656	18.9729	9.99319
CONTROL	ENSMUSG00000023345	28.7764	15.2858	36.4806	15.7149	23.901	20.2501
CONTROL	ENSMUSG00000023348	48.0056	25.2466	62.8879	28.2024	56.5161	37.962
UP	ENSMUSG00000023353	18.5028	12.9062	29.6618	19.5586	22.1274	36.7377
DOWN	ENSMUSG00000023452	25.2657	22.6086	30.3289	18.1172	33.7025	14.1716
CONTROL	ENSMUSG00000023460	21.0472	12.1602	25.3841	16.2318	18.1011	19.441
CONTROL	ENSMUSG00000023495	153.103	100.638	154.494	115.251	176.546	113.807
DOWN	ENSMUSG00000023505	54.664	36.8358	50.3284	33.4678	56.5564	20.2429
CONTROL	ENSMUSG00000023723	26.0836	31.0762	26.7052	28.5065	24.0338	35.595
DOWN	ENSMUSG00000023755	30.4636	23.9104	33.3929	19.4047	26.4798	13.3698
DOWN	ENSMUSG00000023764	16.0174	7.17543	8.25215	3.57691	8.62196	3.6331
DOWN	ENSMUSG00000023826	10.3345	9.07367	8.30209	6.7202	10.4425	4.05192
UP	ENSMUSG00000023827	5.75194	5.74899	12.6529	15.7767	23.4122	33.0833
UP	ENSMUSG00000023832	45.0117	32.0521	64.1683	40.1751	113.039	106.296
CONTROL	ENSMUSG00000023852	28.6223	16.1924	30.2745	16.2078	29.5531	19.1683
CONTROL	ENSMUSG00000023902	32.6887	26.1792	41.0534	21.9884	33.3546	28.8678
UP	ENSMUSG00000023904	58.0353	45.683	101.286	80.4575	106.741	135.915
UP	ENSMUSG00000023905	0.908213	1.28773	1.64973	1.57449	0.557377	12.5058
UP	ENSMUSG00000023906	2.13141	0.885034	3.39736	2.32946	16.0083	16.8446
UP	ENSMUSG00000023909	1.315	0.681423	1.80948	1.32359	2.7403	6.47713
DOWN	ENSMUSG00000023919	5.45259	5.15727	6.95307	3.96544	6.76218	2.42626
DOWN	ENSMUSG00000023932	104.689	66.7683	104.097	65.8298	109.527	45.6363
CONTROL	ENSMUSG00000023938	16.7218	10.7617	22.9163	11.783	19.7528	20.3054
DOWN	ENSMUSG00000023940	40.2599	37.6787	46.0738	26.803	38.6182	8.72881
DOWN	ENSMUSG00000023942	71.0199	61.9362	86.4566	82.1066	63.477	20.2157
CONTROL	ENSMUSG00000023944	3037.12	2448.1	3158.87	2870.45	2507.41	5353.22
CONTROL	ENSMUSG00000023967	9.76758	21.3852	11.9806	18.1311	8.88931	19.7481
CONTROL	ENSMUSG00000023973	86.9718	37.7684	105.395	44.0223	73.6487	55.8253
UP	ENSMUSG00000023977	5.74095	3.18581	7.9709	4.62204	5.84386	7.42199
CONTROL	ENSMUSG00000023980	7.6144	5.70805	7.92341	4.29637	11.6048	4.22645
CONTROL	ENSMUSG00000023988	18.5312	15.1795	17.172	17.2355	22.385	23.2271
CONTROL	ENSMUSG00000023991	14.9381	9.7399	23.1226	11.0077	15.1929	15.5048
CONTROL	ENSMUSG00000024002	61.2041	46.2924	75.6914	52.6012	65.9049	70.6671
CONTROL	ENSMUSG00000024007	157.471	68.5579	164.399	62.3491	188.504	60.8684
UP	ENSMUSG00000024012	48.1167	26.5005	83.9781	59.7677	64.992	130.651
CONTROL	ENSMUSG00000024014	17.7821	16.3787	15.6192	15.3588	23.7807	25.3125
CONTROL	ENSMUSG00000024018	20.8841	9.0455	22.9064	14.6696	24.1957	11.2958
CONTROL	ENSMUSG00000024019	6.28656	5.16029	7.35865	5.39258	7.22591	6.32403
CONTROL	ENSMUSG00000024026	15.7897	22.4562	13.8357	20.4988	17.6233	12.3963
UP	ENSMUSG00000024033	3.71601	1.54458	13.0295	8.71519	10.1754	22.3527
DOWN	ENSMUSG00000024037	11.134	8.02628	11.2082	7.43347	10.2706	4.39109
CONTROL	ENSMUSG00000024045	14.3555	10.4856	16.4171	12.926	15.1017	13.0417
DOWN	ENSMUSG00000024048	45.9431	59.8587	38.2565	37.4216	75.5396	19.4041
CONTROL	ENSMUSG00000024050	11.9132	7.65877	17.3777	8.8741	11.3843	6.69232
CONTROL	ENSMUSG00000024054	6.87624	4.1829	8.0648	4.43517	6.42183	6.57293
DOWN	ENSMUSG00000024056	25.2579	17.1752	23.3514	11.4941	22.3505	12.0224
DOWN	ENSMUSG00000024067	220.756	198.285	248.469	130.484	242.469	28.4281
CONTROL	ENSMUSG00000024073	11.4021	5.87213	12.2232	9.21559	14.1222	5.10289
DOWN	ENSMUSG00000024078	62.0578	50.3605	47.6238	46.0085	48.0995	39.3289
CONTROL	ENSMUSG00000024081	207.529	182.086	221.043	144.828	240.501	64.8968
CONTROL	ENSMUSG00000024082	10.3083	8.96649	9.56123	6.57661	12.7863	3.58455
DOWN	ENSMUSG00000024091	16.0173	21.5856	15.8734	16.7793	21.364	6.44051
CONTROL	ENSMUSG00000024095	7.07195	6.27295	7.05136	5.49935	8.09491	6.68997
DOWN	ENSMUSG00000024097	61.0607	46.0541	76.7868	42.3803	70.489	29.5183
CONTROL	ENSMUSG00000024101	11.9856	7.8899	15.1877	7.89167	10.8231	8.68371
DOWN	ENSMUSG00000024104	23.9801	17.4307	26.092	10.9134	24.3708	7.20788
CONTROL	ENSMUSG00000024120	61.4464	62.384	72.2697	53.5741	80.5604	58.4412
CONTROL	ENSMUSG00000024132	26.4615	28.3346	29.9528	22.5649	53.0307	21.6877
CONTROL	ENSMUSG00000024142	7.59463	5.07037	8.06857	5.57587	7.47913	8.39961
CONTROL	ENSMUSG00000024145	13.2939	10.2451	13.5207	9.52639	18.8178	8.06386
CONTROL	ENSMUSG00000024146	14.8893	11.6594	14.672	9.23634	15.2519	11.3232
CONTROL	ENSMUSG00000024150	5.72689	4.33364	6.3456	3.712	7.25162	15.4603
CONTROL	ENSMUSG00000024151	30.2154	24.0432	34.997	25.1452	30.889	18.8076
CONTROL	ENSMUSG00000024158	6.81204	8.32211	6.80167	9.12696	6.03598	4.07999
CONTROL	ENSMUSG00000024160	5.68492	7.71443	8.03048	8.3502	6.96902	7.96669
CONTROL	ENSMUSG00000024165	15.7733	10.2849	17.2286	12.1208	16.6061	9.79585
CONTROL	ENSMUSG00000024170	9.40352	6.48536	11.2317	7.25762	8.2828	9.99111
DOWN	ENSMUSG00000024182	9.95589	8.76668	12.0314	9.54258	10.9035	4.83463
CONTROL	ENSMUSG00000024191	1.49321	5.76807	1.76157	6.99421	0.929747	4.68117
UP	ENSMUSG00000024193	2.73785	2.50801	5.2868	2.25784	5.00848	6.46794
CONTROL	ENSMUSG00000024197	18.7878	13.4598	21.2775	13.8364	26.8774	17.1212
UP	ENSMUSG00000024201	6.07139	2.80677	10.1728	3.25065	5.70301	9.22047
CONTROL	ENSMUSG00000024206	12.7745	2.4709	16.612	4.14078	8.13391	6.76067
DOWN	ENSMUSG00000024209	4.22144	5.89482	5.97193	4.87684	2.48281	2.3905
CONTROL	ENSMUSG00000024212	3.87982	3.79807	6.2813	4.22514	5.49117	7.18603
CONTROL	ENSMUSG00000024213	41.4348	31.704	44.3206	31.1232	55.416	25.888
CONTROL	ENSMUSG00000024217	217.427	132.107	255.165	140.845	256.722	200.565
DOWN	ENSMUSG00000024218	21.8969	15.3445	19.8474	14.0411	28.5681	5.95813
UP	ENSMUSG00000024220	9.50009	7.41461	22.2393	10.3566	17.5904	24.1334
DOWN	ENSMUSG00000024222	21.9492	22.6447	19.7985	15.7746	26.2178	9.6603
CONTROL	ENSMUSG00000024240	5.97081	6.48883	5.92261	5.56557	6.07938	3.88843
CONTROL	ENSMUSG00000024248	195.292	129.515	225.772	157.091	213.588	155.402
DOWN	ENSMUSG00000024258	31.8579	34.45	35.0441	24.3757	43.968	6.13084
UP	ENSMUSG00000024259	2.9122	2.64518	2.97932	2.89456	2.54317	5.07023
CONTROL	ENSMUSG00000024271	27.0942	16.3657	31.2221	17.1746	27.8181	18.1002
DOWN	ENSMUSG00000024277	9.85867	8.46133	11.4623	6.02852	15.6494	3.85508
CONTROL	ENSMUSG00000024283	13.3764	8.79576	17.8387	9.73237	13.848	12.7932
CONTROL	ENSMUSG00000024287	15.2682	25.0836	21.2253	22.5747	19.3861	16.772
CONTROL	ENSMUSG00000024290	33.2463	17.3096	37.819	19.0516	33.1631	28.1086
CONTROL	ENSMUSG00000024301	14.7297	10.9773	17.2914	9.50567	12.3276	14.5191
UP	ENSMUSG00000024308	5.72719	2.14405	6.44048	3.78596	6.00246	5.24602
DOWN	ENSMUSG00000024309	33.0928	166.16	34.6801	167.086	19.8647	131.447
CONTROL	ENSMUSG00000024312	72.9026	34.1387	72.1978	31.0754	62.7634	27.2044
DOWN	ENSMUSG00000024317	5.64111	6.06516	5.88617	4.7277	5.89236	2.3975
DOWN	ENSMUSG00000024335	74.6564	137.301	76.3355	156.71	54.9958	197.016
CONTROL	ENSMUSG00000024346	361.432	175.179	409.693	247.934	408.101	367.688
UP	ENSMUSG00000024349	0.622953	0.483523	1.5061	1.82637	2.2462	13.0603
DOWN	ENSMUSG00000024359	107.066	80.2401	105.534	59.0916	101.924	39.7707
CONTROL	ENSMUSG00000024360	33.1652	23.8824	32.3355	21.9952	32.364	28.8466
CONTROL	ENSMUSG00000024369	35.3327	29.9462	38.8124	38.447	31.2467	52.8949
DOWN	ENSMUSG00000024370	10.4184	8.77911	11.556	6.90001	11.2042	3.71813
DOWN	ENSMUSG00000024376	26.872	10.2791	36.565	10.5867	11.2587	9.98404
CONTROL	ENSMUSG00000024384	60.1363	20.8094	73.7297	23.0209	59.7027	54.21
CONTROL	ENSMUSG00000024387	76.0537	55.9355	70.3299	52.1554	84.7204	39.8839
UP	ENSMUSG00000024404	8.788	9.86066	8.69701	8.24672	12.7611	12.5107
CONTROL	ENSMUSG00000024406	933.675	612.04	1106.03	742.551	622.933	767.08
UP	ENSMUSG00000024409	0.544199	1.5534	0.232148	1.37862	2.49972	15.2551
CONTROL	ENSMUSG00000024410	3.41956	5.97074	3.24828	5.32189	4.8251	0.453716
DOWN	ENSMUSG00000024414	55.3369	82.1809	73.3038	53.8287	83.3301	20.2896
DOWN	ENSMUSG00000024422	313.407	314.095	336.355	286.749	345.609	105.537
DOWN	ENSMUSG00000024423	39.5258	24.3816	53.9673	26.3882	22.5573	21.1255
CONTROL	ENSMUSG00000024425	11.865	8.2623	20.0271	13.555	9.38303	8.15237
CONTROL	ENSMUSG00000024436	275.704	203.954	272.385	206.87	270.503	228.837
CONTROL	ENSMUSG00000024442	8.50163	8.95255	12.5307	10.032	8.69287	12.1487
UP	ENSMUSG00000024446	72.6333	67.0236	102.966	82.9268	94.479	125.015
CONTROL	ENSMUSG00000024457	6.39228	5.54222	7.55915	5.97451	8.80493	8.33467
CONTROL	ENSMUSG00000024462	5.59694	4.3829	6.45781	4.89008	3.81891	5.85338
CONTROL	ENSMUSG00000024474	106.842	53.8269	123.149	67.5854	95.4373	147.69
CONTROL	ENSMUSG00000024483	71.494	42.7501	87.0067	41.8623	81.7419	43.1012
UP	ENSMUSG00000024486	2.3769	5.94064	1.21067	4.3894	3.10885	45.5562
CONTROL	ENSMUSG00000024487	8.05383	7.30603	10.7751	8.16001	10.4101	8.73265
CONTROL	ENSMUSG00000024491	20.0147	13.9443	21.0497	13.0936	19.8751	15.1691
CONTROL	ENSMUSG00000024493	309.967	130.944	313.906	145.113	214.305	326.097
CONTROL	ENSMUSG00000024498	237.133	217.282	278.858	189.273	272.718	154.247
CONTROL	ENSMUSG00000024515	5.69532	5.8689	7.19277	5.28072	5.97036	4.31691
DOWN	ENSMUSG00000024525	14.2224	8.40119	16.6091	8.86098	9.31842	4.24479
UP	ENSMUSG00000024526	0.410889	0	0.758685	0.141492	2.41718	7.87501
DOWN	ENSMUSG00000024527	8.85936	8.05805	8.91373	5.79652	8.19568	3.25729
DOWN	ENSMUSG00000024537	16.1841	15.9095	15.3445	11.6829	19.9013	4.76879
CONTROL	ENSMUSG00000024538	23.6314	16.7699	41.9526	21.7724	30.1235	16.7496
CONTROL	ENSMUSG00000024539	15.8853	12.2754	18.4706	10.0407	21.7226	11.9999
CONTROL	ENSMUSG00000024542	9.25893	6.151	6.63394	4.61584	6.02032	4.37161
DOWN	ENSMUSG00000024556	4.85726	5.06485	5.27734	3.92204	8.02956	1.95721
CONTROL	ENSMUSG00000024570	8.49888	15.615	10.1701	16.0715	9.94014	20.0292
DOWN	ENSMUSG00000024571	13.7942	23.4904	14.83	16.1377	16.7547	5.36147
CONTROL	ENSMUSG00000024579	14.9805	6.7222	29.8693	7.55335	30.891	8.6358
CONTROL	ENSMUSG00000024583	24.2005	19.0775	31.4556	21.9579	28.3453	25.6149
CONTROL	ENSMUSG00000024587	354.125	189.971	373.775	179.968	269.943	216.469
UP	ENSMUSG00000024589	0.720984	0.51366	1.39258	0.703652	1.19915	5.36119
CONTROL	ENSMUSG00000024590	239.774	145.404	287.289	159.961	215.862	106.031
CONTROL	ENSMUSG00000024594	27.0797	15.6868	24.6831	13.351	35.3333	13.6182
CONTROL	ENSMUSG00000024601	15.5927	6.53103	17.2132	7.33427	20.2347	7.33125
UP	ENSMUSG00000024603	7.46997	3.61605	6.87351	4.00308	5.88476	9.58755
CONTROL	ENSMUSG00000024604	18.404	14.8886	29.704	25.7612	25.0632	18.7407
DOWN	ENSMUSG00000024613	163.741	123.377	171.855	96.8151	159.19	132.424
CONTROL	ENSMUSG00000024614	5.85954	3.70294	7.13882	3.37294	9.62232	5.42523
CONTROL	ENSMUSG00000024619	1.27056	15.5954	0.669018	4.96701	5.96028	13.1644
CONTROL	ENSMUSG00000024640	47.2339	28.0031	37.9968	26.9975	37.1176	28.7082
DOWN	ENSMUSG00000024642	12.8607	13.1671	19.4014	16.0464	9.76234	6.12004
CONTROL	ENSMUSG00000024644	12.2549	6.44164	13.4941	7.74458	13.9749	7.60506
CONTROL	ENSMUSG00000024646	110.25	60.0308	129.954	66.8662	128.12	42.4655
CONTROL	ENSMUSG00000024660	60.0123	50.545	70.3337	56.6767	50.781	54.7613
DOWN	ENSMUSG00000024661	611.935	747.074	541.447	587.167	747.248	353.965
DOWN	ENSMUSG00000024666	7.16002	8.67956	6.00477	5.45732	7.78916	1.46572
DOWN	ENSMUSG00000024667	8.26916	9.07098	8.58053	6.01993	8.37631	1.49848
CONTROL	ENSMUSG00000024683	36.572	31.533	33.2029	32.6909	24.883	35.2296
DOWN	ENSMUSG00000024691	5.54594	5.32215	6.44654	4.40195	5.07652	1.77076
CONTROL	ENSMUSG00000024695	18.6983	15.7805	18.2144	16.7592	17.6055	21.8338
CONTROL	ENSMUSG00000024712	6.55314	4.79567	9.66703	5.29926	6.81015	5.48628
DOWN	ENSMUSG00000024726	11.8475	7.92324	14.9426	7.74845	10.5185	4.29302
CONTROL	ENSMUSG00000024732	29.3142	19.0794	30.9463	23.1491	29.4269	16.5477
DOWN	ENSMUSG00000024735	12.6282	18.1746	14.9595	16.0356	14.3569	6.63638
UP	ENSMUSG00000024736	8.56748	3.2097	11.6928	5.40227	9.65634	12.229
CONTROL	ENSMUSG00000024740	71.3069	52.6902	92.9385	57.2287	85.1299	49.1222
DOWN	ENSMUSG00000024742	47.0196	46.1393	55.6362	28.4855	62.9262	6.41629
DOWN	ENSMUSG00000024764	10.1383	8.26122	12.076	5.5608	14.2047	3.23649
CONTROL	ENSMUSG00000024767	18.5225	24.1876	19.8859	26.1135	15.6907	41.8954
CONTROL	ENSMUSG00000024772	23.4277	22.4386	24.3944	24.8179	24.7458	36.0846
UP	ENSMUSG00000024773	8.5516	4.984	12.1864	5.02669	9.62117	9.43025
UP	ENSMUSG00000024777	4.75737	2.59161	4.52302	2.19695	3.01337	9.05378
CONTROL	ENSMUSG00000024780	29.8688	18.6383	41.6003	23.2972	28.4337	18.1994
UP	ENSMUSG00000024784	0.145246	2.47285	0.819967	4.17724	0.88965	10.0983
CONTROL	ENSMUSG00000024785	135.58	75.6018	159.001	84.0481	175.271	110.824
CONTROL	ENSMUSG00000024791	14.9236	14.4847	13.822	14.9317	11.5433	13.4949
CONTROL	ENSMUSG00000024792	7.27667	7.29871	12.6029	6.95979	7.50869	4.88502
CONTROL	ENSMUSG00000024797	5.12657	5.9216	8.60044	5.70804	6.97392	2.1744
DOWN	ENSMUSG00000024800	10.4353	10.727	9.35047	7.26298	11.9298	4.4869
CONTROL	ENSMUSG00000024811	13.6929	11.9708	17.055	12.2424	16.7762	16.3955
CONTROL	ENSMUSG00000024816	9.08775	6.10882	11.257	6.74851	13.2641	7.03816
DOWN	ENSMUSG00000024817	11.5525	12.6237	4.94504	8.29889	14.2809	4.28424
CONTROL	ENSMUSG00000024829	145.907	108.034	152.907	92.4525	165.47	77.0271
DOWN	ENSMUSG00000024833	14.5868	12.11	14.4674	10.8914	15.1489	4.40937
DOWN	ENSMUSG00000024841	26.1602	25.8117	28.0882	20.5942	25.6307	17.008
DOWN	ENSMUSG00000024844	729.345	667.536	731.244	470.058	849.157	187.673
UP	ENSMUSG00000024847	31.7477	26.7475	29.8592	24.2633	34.7816	53.758
UP	ENSMUSG00000024854	2.06951	3.68111	3.87908	3.81623	2.83839	12.4864
CONTROL	ENSMUSG00000024856	73.4229	45.41	84.1978	58.6032	82.5776	57.8832
UP	ENSMUSG00000024858	6.28368	14.3741	10.1831	12.9796	9.16076	24.8702
UP	ENSMUSG00000024862	8.94775	4.12443	11.323	4.34057	12.8543	19.7154
CONTROL	ENSMUSG00000024870	35.3456	20.5793	36.9203	20.8626	38.9146	22.3713
UP	ENSMUSG00000024873	5.73416	4.1162	7.33801	4.96349	22.0829	13.0024
CONTROL	ENSMUSG00000024875	8.73881	15.7153	11.8266	16.8601	6.42909	15.7187
CONTROL	ENSMUSG00000024891	17.0808	10.0356	17.9823	11.8116	12.5651	13.7946
CONTROL	ENSMUSG00000024902	23.8392	24.3803	25.9213	24.9702	25.5853	20.1558
CONTROL	ENSMUSG00000024906	1.46513	8.14088	1.39421	7.27255	2.0011	4.90266
CONTROL	ENSMUSG00000024908	13.3277	11.5649	14.5161	13.1582	19.8368	13.8945
CONTROL	ENSMUSG00000024914	174.414	153.69	210.575	146.168	188.987	143.999
CONTROL	ENSMUSG00000024925	28.885	52.1441	54.3127	71.072	35.4329	67.8337
CONTROL	ENSMUSG00000024927	15.3249	8.37944	18.99	9.68613	14.4921	11.7584
CONTROL	ENSMUSG00000024941	6.76605	7.51448	8.94482	8.8422	7.23986	7.63753
CONTROL	ENSMUSG00000024944	7.48	14.373	10.7825	14.9342	7.79934	17.8114
CONTROL	ENSMUSG00000024947	10.227	11.7677	13.1274	12.5534	13.5725	16.9238
DOWN	ENSMUSG00000024949	38.0064	36.9573	42.3547	26.0539	51.6624	13.9079
CONTROL	ENSMUSG00000024953	35.0715	33.4716	52.6895	36.4419	47.585	39.4814
CONTROL	ENSMUSG00000024958	4.06904	4.09734	6.32379	6.91658	4.39508	7.91455
UP	ENSMUSG00000024959	43.2594	23.9907	72.9075	47.1798	47.1522	69.223
UP	ENSMUSG00000024962	101.421	47.5912	155.275	64.104	130.915	92.6274
UP	ENSMUSG00000024966	65.453	55.6033	77.8992	73.4636	74.5443	125.072
CONTROL	ENSMUSG00000024968	70.4918	43.1739	88.0429	49.1396	86.0327	32.7791
CONTROL	ENSMUSG00000024974	51.0287	42.0705	60.1596	39.5818	61.9628	48.8879
UP	ENSMUSG00000024985	2.37334	4.43164	4.18961	7.01376	2.07576	22.9761
DOWN	ENSMUSG00000024989	11.8441	9.70426	16.9057	8.55086	11.4265	3.88584
CONTROL	ENSMUSG00000024991	125.05	107.915	137.997	98.2457	135.976	103.612
DOWN	ENSMUSG00000025001	174.1	117.281	160.67	105.133	195.533	94.5434
CONTROL	ENSMUSG00000025024	35.2837	33.2353	40.2138	31.3135	42.0246	42.4036
CONTROL	ENSMUSG00000025027	4.06623	8.97126	4.53052	8.53265	4.5168	10.4482
DOWN	ENSMUSG00000025034	9.87806	13.6359	14.3867	12.4358	12.8446	5.22047
CONTROL	ENSMUSG00000025035	31.2444	28.7133	57.1295	41.4836	46.8283	56.4161
CONTROL	ENSMUSG00000025036	14.2148	19.274	30.9749	32.3375	23.1878	31.7502
UP	ENSMUSG00000025041	1.40683	1.29303	2.08226	1.8435	2.88622	5.23433
CONTROL	ENSMUSG00000025047	11.0174	8.38072	10.1146	7.93912	13.2545	11.9578
DOWN	ENSMUSG00000025050	15.8779	11.9407	16.0555	8.16017	15.4828	5.83136
DOWN	ENSMUSG00000025056	22.3646	92.9169	35.7184	33.7526	16.8419	1.50754
UP	ENSMUSG00000025060	12.2931	5.12923	13.632	6.71996	10.9615	10.7359
CONTROL	ENSMUSG00000025066	306.076	185.549	326.101	173.395	302.708	219.691
DOWN	ENSMUSG00000025068	35.1229	26.7616	37.4066	20.661	22.8358	11.0828
CONTROL	ENSMUSG00000025102	7.66598	6.76559	7.88051	6.93443	9.70289	4.00776
CONTROL	ENSMUSG00000025130	149.118	175.805	114.061	198.27	150.878	137.97
CONTROL	ENSMUSG00000025132	78.6076	86.6672	96.7568	94.6414	89.7119	99.7956
CONTROL	ENSMUSG00000025135	62.1132	38.9176	80.6287	48.4291	64.3366	54.3127
UP	ENSMUSG00000025137	5.96041	8.51323	7.63468	11.7205	6.5135	29.8204
CONTROL	ENSMUSG00000025138	9.45187	8.58475	13.1338	8.10932	10.9335	23.572
CONTROL	ENSMUSG00000025144	55.7484	39.2746	69.1125	45.2361	47.1119	42.2205
CONTROL	ENSMUSG00000025145	4.97773	4.40637	7.42218	6.5684	4.33005	6.85366
UP	ENSMUSG00000025153	28.0986	14.7849	34.2765	22.3078	39.0596	42.1519
CONTROL	ENSMUSG00000025155	22.7051	38.9404	24.4969	37.3492	21.298	32.6194
CONTROL	ENSMUSG00000025156	23.7583	27.0055	31.3664	37.2405	21.6292	46.0255
CONTROL	ENSMUSG00000025158	5.5439	5.00452	7.14759	7.94983	2.75963	8.46858
UP	ENSMUSG00000025159	5.59214	3.51465	7.23947	4.26709	5.34621	7.77262
UP	ENSMUSG00000025161	4.09214	2.91752	8.44693	5.52754	6.41899	30.2961
CONTROL	ENSMUSG00000025162	7.36248	13.9303	8.14485	10.5732	8.82579	6.27977
CONTROL	ENSMUSG00000025169	11.5317	7.22373	13.3545	7.03049	9.24053	8.08679
CONTROL	ENSMUSG00000025171	0.901036	2.86818	3.11938	4.51997	1.63203	5.9834
CONTROL	ENSMUSG00000025173	69.0397	46.7402	88.6614	55.4355	63.6773	106.046
UP	ENSMUSG00000025178	6.99415	5.63451	8.45705	6.68976	7.29649	9.80249
CONTROL	ENSMUSG00000025184	5.3823	1.6371	5.44032	2.44504	4.04778	5.09022
CONTROL	ENSMUSG00000025188	6.44254	3.91482	7.52915	3.89997	10.1081	7.88158
CONTROL	ENSMUSG00000025203	36.5942	23.4364	32.68	22.5042	40.8448	15.0794
CONTROL	ENSMUSG00000025208	26.1814	29.6928	28.0721	30.1561	26.1597	28.2362
CONTROL	ENSMUSG00000025209	4.18281	5.7491	4.30303	6.53627	3.41687	4.47131
CONTROL	ENSMUSG00000025220	28.3045	15.0228	27.6335	16.0934	23.5273	34.1294
DOWN	ENSMUSG00000025223	7.06398	8.4144	13.1178	5.758	13.6407	2.38385
UP	ENSMUSG00000025224	5.23039	3.36174	6.21617	3.75885	6.96048	8.78285
UP	ENSMUSG00000025225	4.65533	2.09481	4.82712	4.3839	5.65685	10.8805
CONTROL	ENSMUSG00000025226	4.10162	5.42198	3.84636	3.33321	3.20156	3.32131
UP	ENSMUSG00000025227	4.79205	2.7586	9.44708	4.10825	6.69211	5.84361
UP	ENSMUSG00000025228	5.22316	7.04757	5.05707	9.96408	3.27082	15.588
DOWN	ENSMUSG00000025232	4.17762	13.5161	8.83588	9.45834	4.62167	8.1064
UP	ENSMUSG00000025235	5.20158	4.27775	6.0268	5.0874	5.26451	8.99008
CONTROL	ENSMUSG00000025246	9.61349	5.22814	11.1438	6.54122	10.1043	4.71751
CONTROL	ENSMUSG00000025260	81.759	51.8141	112.07	56.2505	83.4245	61.535
CONTROL	ENSMUSG00000025261	48.2538	22.4406	64.6568	23.6459	46.0879	35.7552
CONTROL	ENSMUSG00000025266	12.3659	4.22256	15.0188	5.79045	16.0273	6.13392
UP	ENSMUSG00000025272	5.11497	4.03517	1.65779	2.77248	6.13944	5.66643
CONTROL	ENSMUSG00000025280	2.79591	3.53519	3.65447	3.37262	3.79437	5.13001
DOWN	ENSMUSG00000025283	28.2257	31.4484	40.6175	20.5423	27.9668	3.3295
CONTROL	ENSMUSG00000025287	15.3002	12.2654	12.7009	10.1791	13.7115	15.1878
CONTROL	ENSMUSG00000025332	9.58608	5.67873	11.0527	5.67964	10.1624	5.68557
DOWN	ENSMUSG00000025337	27.288	33.2523	26.8385	25.5857	22.8294	19.14
CONTROL	ENSMUSG00000025350	15.7166	27.3305	15.1413	30.2043	19.4418	14.5827
UP	ENSMUSG00000025357	1.26192	3.29108	2.00196	3.5858	3.40336	5.48982
DOWN	ENSMUSG00000025358	19.0516	18.1845	27.553	13.5115	25.2031	4.39689
CONTROL	ENSMUSG00000025364	556.352	427.292	618.66	702.022	423.763	1238.81
UP	ENSMUSG00000025369	3.50472	2.57928	6.19156	3.07834	5.36498	5.14473
CONTROL	ENSMUSG00000025371	18.0588	10.7026	18.7611	12.0976	16.8316	11.3214
CONTROL	ENSMUSG00000025372	20.0016	9.41866	13.4581	10.583	16.0766	14.4049
DOWN	ENSMUSG00000025374	31.1312	24.6592	32.5079	24.5732	28.2604	14.4483
CONTROL	ENSMUSG00000025377	4.02305	5.44465	4.76035	6.33232	2.823	8.09441
CONTROL	ENSMUSG00000025381	33.8825	30.4864	32.067	31.4966	29.1778	19.8552
DOWN	ENSMUSG00000025393	174.324	398.462	142.944	286.24	185.674	90.9859
DOWN	ENSMUSG00000025395	23.8478	25.7523	23.0442	17.8102	28.2997	12.6069
UP	ENSMUSG00000025402	1.30291	0.781008	1.92601	1.80163	1.77568	6.04538
DOWN	ENSMUSG00000025407	43.3877	14.7449	24.2036	9.71912	21.7003	9.25832
UP	ENSMUSG00000025408	13.5432	7.84283	10.5204	6.96841	6.52421	31.5006
CONTROL	ENSMUSG00000025409	14.0566	19.4899	13.9417	16.7405	17.5014	18.4954
UP	ENSMUSG00000025410	88.6867	38.0361	119.871	48.6841	94.2598	89.8374
CONTROL	ENSMUSG00000025413	34.7929	23.8521	32.4488	20.4474	32.9853	26.24
CONTROL	ENSMUSG00000025423	15.3938	8.02439	18.546	8.86209	18.1637	11.3813
DOWN	ENSMUSG00000025428	350.963	302.301	362.654	259.191	382.173	159.564
DOWN	ENSMUSG00000025436	22.7045	17.6074	23.5229	15.913	21.1319	6.11731
DOWN	ENSMUSG00000025439	34.2958	27.8955	33.1009	24.2419	35.9706	18.1844
CONTROL	ENSMUSG00000025451	7.20819	5.02718	10.2017	5.29546	8.3029	4.73614
CONTROL	ENSMUSG00000025464	16.6142	9.26098	19.6131	9.4959	14.3276	12.0204
CONTROL	ENSMUSG00000025465	42.0948	20.7592	48.1008	27.3452	38.7809	51.2025
CONTROL	ENSMUSG00000025466	5.75499	4.59755	9.88051	7.0797	8.09592	5.07701
CONTROL	ENSMUSG00000025470	21.5842	17.9564	19.972	15.3176	24.2728	15.4306
CONTROL	ENSMUSG00000025474	3.78965	4.21191	5.78662	5.77074	3.61367	5.91166
UP	ENSMUSG00000025477	1.67387	2.3715	2.20491	3.69113	2.11007	10.1666
CONTROL	ENSMUSG00000025480	14.5556	20.3338	13.64	14.3588	14.3102	22.7218
DOWN	ENSMUSG00000025481	18.3924	25.705	29.4601	41.5142	16.6928	17.7378
UP	ENSMUSG00000025484	10.151	16.8688	11.4623	26.2003	8.61144	36.0911
CONTROL	ENSMUSG00000025485	8.33379	5.21024	7.65309	5.27233	6.42058	5.09924
UP	ENSMUSG00000025487	1660.3	1194.25	1979.7	1498.99	1631.99	3292.7
CONTROL	ENSMUSG00000025491	337.082	151.622	605.028	261.373	103.429	175.772
CONTROL	ENSMUSG00000025492	1078.87	572.869	1046.24	771.928	362.051	490.504
CONTROL	ENSMUSG00000025494	1.72789	3.51675	1.74082	5.94972	0.91191	5.69807
CONTROL	ENSMUSG00000025495	4.50488	4.12617	5.03195	4.63916	5.30837	5.94089
UP	ENSMUSG00000025499	13.818	20.031	15.7962	31.224	9.41595	48.9882
CONTROL	ENSMUSG00000025503	270.423	156.325	256.792	169.093	315.25	215.204
CONTROL	ENSMUSG00000025508	3209.9	4732.41	4034.75	5783.57	3508.77	5971.5
UP	ENSMUSG00000025509	6.17526	2.95821	8.19153	3.75945	9.57803	5.95841
CONTROL	ENSMUSG00000025510	32.153	30.578	33.9172	33.5741	34.8666	45.9798
UP	ENSMUSG00000025511	13.3531	11.0331	19.0799	14.5198	22.1989	38.7802
DOWN	ENSMUSG00000025521	12.8028	18.3009	13.5377	14.4286	10.1026	9.49513
UP	ENSMUSG00000025533	0.902079	3.11565	1.548	3.8897	1.56878	7.41662
CONTROL	ENSMUSG00000025538	8.14802	5.76966	7.76565	4.8259	9.54665	4.74807
DOWN	ENSMUSG00000025544	10.7533	11.2685	16.0462	8.37248	13.0351	5.40117
UP	ENSMUSG00000025545	14.1402	7.91594	27.1298	12.1988	19.293	12.884
CONTROL	ENSMUSG00000025572	7.51516	3.53459	10.3259	4.07472	6.17382	6.29509
CONTROL	ENSMUSG00000025574	123.933	53.2414	150.744	54.124	125.635	35.4629
CONTROL	ENSMUSG00000025575	9.29698	6.76916	9.21183	8.12698	8.1061	9.1655
UP	ENSMUSG00000025579	3.8824	4.71562	7.58213	4.65048	5.70027	9.03423
CONTROL	ENSMUSG00000025580	426.487	393.597	415.923	408.689	455.271	453.39
UP	ENSMUSG00000025607	96.55	96.8305	185.718	244.371	108.138	198.056
DOWN	ENSMUSG00000025630	21.5209	20.0305	22.1307	17.5699	28.1153	11.2757
UP	ENSMUSG00000025647	15.4459	8.3254	23.1058	11.8506	19.0521	27.6744
UP	ENSMUSG00000025650	0	1.70381	0.0164626	0.828585	1.32734	20.9913
CONTROL	ENSMUSG00000025651	22.7347	58.4732	30.5171	42.7134	25.5222	60.565
CONTROL	ENSMUSG00000025722	14.2959	13.0897	13.3991	11.0277	11.7415	13.3447
CONTROL	ENSMUSG00000025723	17.0035	18.2272	14.1047	14.147	35.0903	25.7122
DOWN	ENSMUSG00000025724	75.3086	121.389	73.0257	100.405	51.2132	29.8828
DOWN	ENSMUSG00000025726	21.2934	22.6881	13.3926	13.17	7.87678	1.13002
UP	ENSMUSG00000025730	11.1284	6.82108	13.9915	9.32401	10.8614	15.5676
CONTROL	ENSMUSG00000025731	19.975	17.1359	28.8757	18.3414	27.5969	19.4955
CONTROL	ENSMUSG00000025733	12.6148	12.0344	13.2787	13.6163	12.8665	14.3052
UP	ENSMUSG00000025736	4.41013	4.5129	5.40222	5.4362	4.61369	10.6817
UP	ENSMUSG00000025745	21.1501	11.51	19.6255	12.688	21.7845	15.6061
CONTROL	ENSMUSG00000025747	12.8901	9.61938	14.6884	8.52966	16.2385	7.52474
UP	ENSMUSG00000025757	3.68799	3.66982	10.8179	9.62115	19.6337	18.4911
CONTROL	ENSMUSG00000025762	7.1806	32.4092	7.72046	13.563	10.8209	7.75297
DOWN	ENSMUSG00000025764	41.6372	34.8367	44.2033	27.1868	47.9169	24.6542
CONTROL	ENSMUSG00000025781	187.112	107.823	221.29	101.373	214.223	54.6056
CONTROL	ENSMUSG00000025782	8.51253	7.97511	9.34467	6.2794	7.29995	9.50144
DOWN	ENSMUSG00000025785	51.5702	69.1618	45.2947	52.1556	55.9985	22.493
UP	ENSMUSG00000025786	6.83166	4.19963	7.3607	4.91381	6.11145	6.84317
UP	ENSMUSG00000025791	3.44706	1.04099	3.74641	2.48354	5.97657	7.70428
CONTROL	ENSMUSG00000025793	10.1769	9.19733	12.1366	9.49478	8.28605	12.7498
CONTROL	ENSMUSG00000025795	7.56962	6.30422	7.57812	6.14288	8.69645	6.41714
CONTROL	ENSMUSG00000025809	40.1818	12.1093	54.4926	13.3047	31.9362	20.4891
CONTROL	ENSMUSG00000025823	19.8533	172.447	24.5434	181.568	18.2594	124.827
DOWN	ENSMUSG00000025825	28.4894	45.9016	32.6813	28.7277	46.9862	6.68365
DOWN	ENSMUSG00000025856	74.2061	109.806	83.8612	99.3774	65.7995	30.0362
DOWN	ENSMUSG00000025857	5.82687	6.69365	10.3816	4.60939	8.92389	2.44448
UP	ENSMUSG00000025858	43.1324	92.2706	49.6924	134.644	30.2349	309.829
CONTROL	ENSMUSG00000025862	16.8108	5.91658	14.6952	8.14587	12.4687	3.49134
UP	ENSMUSG00000025868	124.081	75.3459	194.912	108.257	199.88	157.976
CONTROL	ENSMUSG00000025869	59.2045	36.2375	68.7106	37.4873	58.7491	39.1134
CONTROL	ENSMUSG00000025872	44.7048	35.8056	54.4945	40.2065	49.0893	41.038
CONTROL	ENSMUSG00000025873	8.62428	4.9928	9.17286	5.04878	6.90313	9.17244
UP	ENSMUSG00000025875	3.97463	2.81213	4.08351	3.57895	5.96231	10.7984
DOWN	ENSMUSG00000025894	11.6736	7.15475	11.4046	5.87527	10.8504	4.27456
CONTROL	ENSMUSG00000025898	26.2288	17.4673	28.9646	17.717	24.8067	16.6367
CONTROL	ENSMUSG00000025917	66.7148	38.4885	74.4483	35.7011	69.0641	45.1316
DOWN	ENSMUSG00000025925	12.8566	10.5865	12.9339	7.39219	11.0764	7.15819
DOWN	ENSMUSG00000025930	57.2867	9.64633	84.4568	10.479	16.9699	2.27392
CONTROL	ENSMUSG00000025933	6.98222	3.1841	8.49664	2.88482	5.46379	5.39355
CONTROL	ENSMUSG00000025935	63.8096	16.6619	57.8397	25.3787	48.8872	64.4226
DOWN	ENSMUSG00000025940	6.48106	7.29751	5.77189	5.58564	4.82546	2.38405
DOWN	ENSMUSG00000025950	24.7013	25.326	23.8687	17.215	47.5031	7.65196
CONTROL	ENSMUSG00000025958	4.373	2.49826	5.69365	3.48326	3.81468	9.12307
DOWN	ENSMUSG00000025964	6.07097	6.14256	6.81664	5.88815	3.79919	3.18634
DOWN	ENSMUSG00000025967	671.115	588.547	601.32	507.335	792.803	399.89
CONTROL	ENSMUSG00000025968	36.5567	28.1796	35.898	20.4308	36.1191	18.583
DOWN	ENSMUSG00000025969	1.75909	6.60207	2.85596	5.95454	0.317525	0.975279
UP	ENSMUSG00000025979	6.98507	5.47453	10.6026	6.75677	9.16133	10.8268
DOWN	ENSMUSG00000025980	329.095	218.683	341.549	200.165	278.686	134.914
CONTROL	ENSMUSG00000025982	18.1133	14.5939	19.8557	13.9276	23.6302	12.5773
DOWN	ENSMUSG00000025995	123.53	168.762	120.465	97.2529	149.058	19.7817
UP	ENSMUSG00000026003	4.08478	3.02531	6.39722	5.14823	7.8568	7.86964
CONTROL	ENSMUSG00000026019	43.7661	31.6105	44.5897	30.6639	42.4098	28.9916
CONTROL	ENSMUSG00000026021	42.2212	39.3318	50.4839	41.716	45.2142	51.2548
UP	ENSMUSG00000026031	5.08198	6.64495	5.47006	5.33799	7.55871	14.5611
CONTROL	ENSMUSG00000026034	26.6547	18.9734	35.8671	19.5306	29.8844	18.0493
CONTROL	ENSMUSG00000026035	9.9283	8.08972	15.2365	8.66411	13.477	6.4084
CONTROL	ENSMUSG00000026036	5.50829	7.24155	5.17767	6.54771	5.27878	3.64
CONTROL	ENSMUSG00000026037	28.4442	17.279	30.4546	17.4527	25.5248	16.0239
DOWN	ENSMUSG00000026039	18.3139	10.9798	22.8745	8.20597	13.627	7.3811
DOWN	ENSMUSG00000026049	7.20744	11.0262	8.36534	7.25119	10.6219	2.88753
CONTROL	ENSMUSG00000026083	69.3654	47.7288	87.2622	50.2181	73.6954	62.3271
CONTROL	ENSMUSG00000026087	37.4458	42.498	38.8113	44.7323	31.3941	70.0405
DOWN	ENSMUSG00000026095	15.8905	13.0912	16.2899	9.10152	17.0636	6.87768
CONTROL	ENSMUSG00000026103	7.4082	3.2296	11.6686	3.40226	6.2489	5.20386
DOWN	ENSMUSG00000026112	4.24919	5.41867	4.48914	4.437	5.06177	1.62143
UP	ENSMUSG00000026123	76.9883	33.6891	79.8371	37.1866	80.3705	135.806
CONTROL	ENSMUSG00000026134	7.93489	5.96726	8.87434	4.9046	13.4155	5.11297
CONTROL	ENSMUSG00000026150	28.0847	16.4085	31.3411	16.7457	28.8239	10.176
CONTROL	ENSMUSG00000026155	12.8767	16.0329	14.8752	14.8186	18.1058	12.5028
CONTROL	ENSMUSG00000026159	19.6028	6.44786	19.9421	6.6314	11.7967	5.98007
CONTROL	ENSMUSG00000026162	4.99821	4.16391	6.49224	5.05411	6.74604	8.23704
CONTROL	ENSMUSG00000026172	4.2031	4.95106	5.018	4.71824	3.89162	6.80286
DOWN	ENSMUSG00000026174	9.24729	8.49402	12.0843	7.46797	11.0735	3.52348
CONTROL	ENSMUSG00000026176	8.98128	6.12196	15.5147	7.78873	8.97067	9.4192
CONTROL	ENSMUSG00000026179	20.8313	45.9436	24.0923	47.9986	21.6973	59.3504
DOWN	ENSMUSG00000026187	19.027	15.6972	15.8325	12.6058	19.226	7.95821
CONTROL	ENSMUSG00000026189	17.6774	14.9429	24.2747	20.982	21.6718	22.4984
DOWN	ENSMUSG00000026192	36.1096	28.6918	35.4313	23.0717	35.0885	11.3476
DOWN	ENSMUSG00000026193	14.7957	8.21669	16.7874	6.81752	14.8632	4.77343
CONTROL	ENSMUSG00000026197	11.1272	9.54841	7.87854	9.44749	11.6215	11.3756
CONTROL	ENSMUSG00000026200	5.09957	8.52175	10.9249	6.26135	0.264592	0.40898
CONTROL	ENSMUSG00000026201	13.3675	11.6971	16.196	13.2671	15.4374	9.21168
CONTROL	ENSMUSG00000026202	84.4942	92.2035	113.65	111.222	57.7483	79.4287
UP	ENSMUSG00000026204	0.122562	1.16817	0	1.08632	0.0936835	14.9126
UP	ENSMUSG00000026207	0.410889	0.634615	0.759456	0.901982	3.09058	6.6016
UP	ENSMUSG00000026209	17.5351	10.8299	19.4761	12.482	21.2819	25.3113
CONTROL	ENSMUSG00000026223	5.30342	7.58683	4.10066	7.17402	9.99994	3.95255
CONTROL	ENSMUSG00000026234	869.663	416.651	948.816	416.265	724.472	607.911
CONTROL	ENSMUSG00000026238	1802.74	1908.8	2306.98	1804.41	1735.48	1710.46
DOWN	ENSMUSG00000026239	4.12137	7.91517	5.09287	5.96311	5.93642	1.03871
CONTROL	ENSMUSG00000026240	11.0674	7.68014	20.2727	10.9357	11.6837	4.21795
DOWN	ENSMUSG00000026248	9.75435	18.9068	11.0212	12.375	11.639	7.22073
CONTROL	ENSMUSG00000026249	5.55795	6.50697	4.85441	5.40756	7.77999	7.0288
CONTROL	ENSMUSG00000026254	138.698	67.8933	160.304	89.9111	100.84	120.983
CONTROL	ENSMUSG00000026260	58.9881	63.7901	59.8551	70.1191	58.0695	75.6266
UP	ENSMUSG00000026269	2.87642	3.59895	4.63835	6.1284	2.5874	8.84322
DOWN	ENSMUSG00000026270	21.9199	16.5175	39.6259	17.0501	17.0775	6.03638
CONTROL	ENSMUSG00000026275	6.87311	4.51771	7.05978	4.39181	7.78957	5.90745
DOWN	ENSMUSG00000026276	19.1595	13.9623	21.2361	11.9492	24.5144	7.07453
CONTROL	ENSMUSG00000026278	16.1205	15.6546	14.303	15.8852	15.6097	16.7772
DOWN	ENSMUSG00000026281	101.103	84.566	116.2	63.9729	118.878	16.1771
CONTROL	ENSMUSG00000026283	26.6215	21.9136	19.3936	22.4722	20.2189	26.5679
UP	ENSMUSG00000026305	4.04152	4.88144	3.31365	4.81749	13.0535	35.6864
CONTROL	ENSMUSG00000026309	43.1022	33.6122	52.0763	40.6079	52.0044	63.0469
DOWN	ENSMUSG00000026349	10.7309	8.80483	11.1609	6.00477	9.83492	4.96097
CONTROL	ENSMUSG00000026353	64.7532	42.4758	78.4557	37.9997	68.0308	46.5549
DOWN	ENSMUSG00000026355	27.647	25.7207	27.5369	22.1509	33.716	9.75475
CONTROL	ENSMUSG00000026356	27.4815	14.292	30.6363	14.864	23.663	20.6982
CONTROL	ENSMUSG00000026361	12.1704	4.13909	12.5048	4.70493	11.0506	14.8371
CONTROL	ENSMUSG00000026374	24.3367	24.2056	24.7341	24.1634	22.5886	26.0291
CONTROL	ENSMUSG00000026377	62.8354	49.6817	70.7413	54.5481	58.4115	60.345
DOWN	ENSMUSG00000026380	29.7317	11.2381	40.5139	11.9542	27.1247	6.91634
UP	ENSMUSG00000026385	393.128	473.173	453.277	547.107	580.071	984.696
DOWN	ENSMUSG00000026398	16.5559	19.7483	18.3419	21.7214	14.3979	10.8578
UP	ENSMUSG00000026421	14.3762	7.71371	21.7061	11.0837	22.5132	42.0785
DOWN	ENSMUSG00000026427	19.1397	17.5259	21.4765	13.6759	20.2442	8.28673
DOWN	ENSMUSG00000026429	10.9738	33.3832	11.7372	16.446	14.3885	1.03888
DOWN	ENSMUSG00000026439	13.1946	8.04033	12.2492	7.06926	10.3002	4.33755
CONTROL	ENSMUSG00000026456	70.211	57.8554	108.11	77.025	53.2013	72.5362
CONTROL	ENSMUSG00000026457	6.86604	6.54564	8.21208	6.56982	9.39967	5.07864
DOWN	ENSMUSG00000026473	20.68	36.6203	15.4473	23.858	19.8545	8.01458
DOWN	ENSMUSG00000026478	11.2299	22.1616	16.1202	27.8356	5.96122	22.8919
CONTROL	ENSMUSG00000026484	10.1451	9.99832	11.1276	8.58018	13.517	8.4082
DOWN	ENSMUSG00000026496	139.947	92.8321	116.193	92.9084	121.049	65.6802
UP	ENSMUSG00000026499	17.468	8.54275	19.9341	9.89165	19.3935	18.3437
DOWN	ENSMUSG00000026511	21.6772	34.2823	22.2122	23.6324	32.2504	9.71754
DOWN	ENSMUSG00000026516	10.5592	10.2369	10.4146	8.08378	10.5246	5.1269
CONTROL	ENSMUSG00000026520	287.735	75.7187	296.25	112.892	170.475	111.657
DOWN	ENSMUSG00000026526	10.413	15.4134	15.6954	14.2445	17.599	1.77722
UP	ENSMUSG00000026547	152.386	63.799	141.586	90.5688	159.964	138.768
CONTROL	ENSMUSG00000026553	14.5534	11.9234	19.8967	11.004	26.1842	8.52994
CONTROL	ENSMUSG00000026554	7.28693	4.75131	10.6254	5.86022	7.17491	6.56729
UP	ENSMUSG00000026556	7.89326	4.96752	12.6682	6.99848	14.718	9.36266
CONTROL	ENSMUSG00000026558	37.331	23.3075	33.7083	24.9367	33.4482	36.2017
CONTROL	ENSMUSG00000026566	18.0497	8.83302	22.046	9.52688	19.8402	9.30473
CONTROL	ENSMUSG00000026568	23.2703	14.5968	34.2164	18.27	30.7195	8.40796
DOWN	ENSMUSG00000026575	6.92602	11.4525	8.68222	7.63558	8.93155	2.58823
CONTROL	ENSMUSG00000026576	44.5735	21.0558	51.0832	22.175	32.4559	19.7698
UP	ENSMUSG00000026594	19.6869	23.8326	23.2371	28.0035	22.2912	46.6667
UP	ENSMUSG00000026600	11.8108	10.9671	21.2321	16.9215	23.8954	26.9539
DOWN	ENSMUSG00000026605	43.0135	28.4016	41.952	21.6075	37.0023	20.3941
CONTROL	ENSMUSG00000026608	5.01183	5.69661	4.99206	5.57998	4.50758	8.32602
CONTROL	ENSMUSG00000026615	76.6987	40.0745	80.3105	39.831	78.4004	62.6855
CONTROL	ENSMUSG00000026617	3.30985	5.18761	4.87978	3.69374	4.35271	3.96941
CONTROL	ENSMUSG00000026618	15.6464	15.1732	20.4541	15.7319	14.2999	12.7505
DOWN	ENSMUSG00000026622	4.7607	5.87402	4.03981	2.98758	4.55122	1.4619
CONTROL	ENSMUSG00000026626	11.3748	7.72385	12.0909	7.62023	12.4561	7.25636
UP	ENSMUSG00000026643	23.7496	15.2619	25.8443	14.7997	24.6858	32.2298
DOWN	ENSMUSG00000026659	10.9882	9.44929	10.125	7.44928	11.6968	4.37275
DOWN	ENSMUSG00000026662	4.09455	5.10181	3.94309	4.17452	4.11266	2.62846
DOWN	ENSMUSG00000026669	20.4301	18.1641	21.4149	15.9113	18.3072	11.7829
DOWN	ENSMUSG00000026683	8.63252	8.71547	8.53272	6.83823	8.67562	2.72169
DOWN	ENSMUSG00000026687	22.9723	18.5869	23.7249	12.5063	29.8897	11.1632
UP	ENSMUSG00000026701	10.0223	13.6967	3.78861	7.73206	22.9573	34.4076
DOWN	ENSMUSG00000026708	8.70901	5.95803	9.55483	5.67599	9.89651	1.78815
DOWN	ENSMUSG00000026709	4.31528	6.43736	5.17492	3.57505	6.31809	0.608593
CONTROL	ENSMUSG00000026727	19.9297	8.97091	24.585	8.83353	18.1495	8.51896
DOWN	ENSMUSG00000026728	237.605	192.061	338.687	198.048	176.733	67.1716
UP	ENSMUSG00000026740	5.50396	4.84373	12.9087	6.86672	6.03061	11.982
DOWN	ENSMUSG00000026750	169.987	145.3	185.693	101.408	213.43	58.0749
CONTROL	ENSMUSG00000026755	85.3019	63.3247	100.521	69.492	92.6231	64.3055
CONTROL	ENSMUSG00000026761	4.42751	3.62925	5.16945	3.23451	4.11841	6.02432
CONTROL	ENSMUSG00000026764	4.93556	4.26232	5.6295	4.94667	9.6538	10.1763
CONTROL	ENSMUSG00000026767	6.27318	5.1361	8.0752	4.23025	9.45694	4.59967
CONTROL	ENSMUSG00000026771	9.70615	2.04485	3.2414	0.915275	1.67778	61.5417
CONTROL	ENSMUSG00000026775	33.2586	7.69407	45.1683	9.69061	27.4867	38.2315
UP	ENSMUSG00000026781	4.97499	2.39234	4.90129	2.43126	3.53856	5.86093
DOWN	ENSMUSG00000026784	2.41528	5.39282	3.47978	4.5907	3.87401	1.63212
CONTROL	ENSMUSG00000026790	38.7235	22.8039	44.2536	25.0254	32.0895	26.3919
UP	ENSMUSG00000026796	14.1367	6.8964	21.1298	9.95004	17.7059	15.0662
CONTROL	ENSMUSG00000026798	6.85018	4.34361	8.73641	4.72008	7.14138	6.20203
UP	ENSMUSG00000026799	22.1681	13.8952	23.6933	13.3664	22.2579	29.2245
DOWN	ENSMUSG00000026803	19.4487	17.9958	18.9289	12.0248	19.6647	7.30391
CONTROL	ENSMUSG00000026810	56.7002	66.6483	60.1487	85.834	47.1321	75.9869
CONTROL	ENSMUSG00000026817	6.25748	8.57008	7.57567	11.1947	3.51159	7.77454
UP	ENSMUSG00000026827	12.4371	7.82657	22.3744	14.4645	15.0468	14.6013
DOWN	ENSMUSG00000026831	11.0861	13.3541	10.9829	9.00565	9.79054	1.62811
CONTROL	ENSMUSG00000026843	56.6928	66.0875	72.2027	50.7029	78.4936	42.8315
UP	ENSMUSG00000026848	18.5395	12.3154	21.3867	15.5029	19.1964	28.1319
DOWN	ENSMUSG00000026849	4.63054	10.0386	6.59622	7.90498	8.51309	3.84851
DOWN	ENSMUSG00000026851	15.0152	14.1138	15.121	10.2917	15.1737	7.60772
CONTROL	ENSMUSG00000026857	27.138	21.5404	31.542	38.1536	19.6383	33.2084
UP	ENSMUSG00000026860	30.294	17.4134	33.7866	30.1389	18.7389	58.0731
DOWN	ENSMUSG00000026869	7.13967	6.50889	6.13196	4.9149	8.52748	3.1228
UP	ENSMUSG00000026878	30.1225	22.2498	46.3969	28.6776	35.5734	49.9956
UP	ENSMUSG00000026883	11.2619	8.36117	12.6281	10.9183	18.2436	18.5771
CONTROL	ENSMUSG00000026887	6.03002	5.37096	6.81208	4.91097	6.77656	4.66678
CONTROL	ENSMUSG00000026895	42.3084	49.5189	61.8765	59.776	57.5678	31.9525
DOWN	ENSMUSG00000026914	53.405	60.2981	55.8393	42.6903	64.5085	16.51
UP	ENSMUSG00000026915	118.927	53.9706	164.527	74.359	128.277	286.356
DOWN	ENSMUSG00000026917	39.7301	46.8697	43.733	36.4996	22.4066	10.2541
CONTROL	ENSMUSG00000026918	8.55036	19.0305	11.4437	17.7695	8.08511	13.1933
UP	ENSMUSG00000026921	28.2837	19.4749	31.6226	23.8397	50.2425	62.296
UP	ENSMUSG00000026922	7.11417	11.3047	9.16532	12.4641	11.2432	24.7062
UP	ENSMUSG00000026939	3.45854	4.98429	5.53901	9.11205	5.63093	11.7623
CONTROL	ENSMUSG00000026955	4.27853	4.87157	6.46083	4.8297	3.95281	5.45491
CONTROL	ENSMUSG00000026958	7.47933	4.82776	7.46509	5.59932	4.81056	9.95017
UP	ENSMUSG00000026960	13.0288	5.40437	19.3584	6.41854	13.6758	21.3233
CONTROL	ENSMUSG00000026965	8.9834	7.51304	12.4628	9.41036	8.86516	10.554
CONTROL	ENSMUSG00000026966	31.7619	29.3457	39.2144	38.1116	24.5	43.1781
UP	ENSMUSG00000026969	6.07334	2.03003	13.4525	5.67793	8.48727	256.575
CONTROL	ENSMUSG00000026974	10.0889	6.68427	10.5641	7.51613	8.79024	8.71598
CONTROL	ENSMUSG00000026977	27.534	25.3901	26.0742	15.9076	41.4796	18.7774
CONTROL	ENSMUSG00000026991	9.59621	13.9693	10.6316	15.0068	9.39351	14.9037
DOWN	ENSMUSG00000026999	6.20942	8.30502	6.02133	5.5917	6.82102	3.39629
CONTROL	ENSMUSG00000027002	8.34986	6.2474	8.75961	6.56015	7.516	8.0164
UP	ENSMUSG00000027006	24.3261	15.1294	23.2807	14.3297	20.8179	19.5359
CONTROL	ENSMUSG00000027011	20.5207	16.9481	24.0341	19.0671	22.424	21.9885
CONTROL	ENSMUSG00000027014	7.55123	5.10709	10.6082	6.43506	7.89433	7.62071
DOWN	ENSMUSG00000027018	68.4655	48.1048	78.8945	37.2043	84.5958	16.224
CONTROL	ENSMUSG00000027067	465.681	284.752	599.133	372.664	415.144	506.62
CONTROL	ENSMUSG00000027080	82.1116	49.8945	99.0914	53.2844	79.4027	66.3419
CONTROL	ENSMUSG00000027082	15.2927	8.26565	15.0611	11.295	10.8691	9.36359
UP	ENSMUSG00000027087	10.0526	4.04593	15.9004	9.32182	14.8287	29.5247
UP	ENSMUSG00000027091	269.027	128.105	322.027	159.555	288.83	595.989
DOWN	ENSMUSG00000027104	5.79508	5.14958	6.71719	4.10516	5.50176	3.75472
CONTROL	ENSMUSG00000027111	19.0736	16.4831	28.4044	20.8154	22.1039	25.5454
DOWN	ENSMUSG00000027131	66.7304	45.4869	74.8342	43.0536	63.019	21.2919
DOWN	ENSMUSG00000027132	14.2502	12.6343	18.2755	12.5263	13.8934	8.20703
DOWN	ENSMUSG00000027133	220.344	106.06	283.7	133.139	207.98	70.5353
DOWN	ENSMUSG00000027160	77.2181	50.6099	102.137	50.5922	78.1369	45.7169
CONTROL	ENSMUSG00000027162	7.62611	4.41683	7.42247	4.68471	7.90208	6.97917
CONTROL	ENSMUSG00000027163	10.2912	11.9092	14.4064	10.9434	14.4464	16.0935
UP	ENSMUSG00000027165	22.1225	19.4282	22.5027	19.7531	24.5188	53.9419
DOWN	ENSMUSG00000027166	8.86087	12.7095	9.10281	9.30406	11.0539	3.0047
DOWN	ENSMUSG00000027173	8.02646	5.90367	8.20598	4.13099	7.80342	2.20622
CONTROL	ENSMUSG00000027176	11.0748	8.02069	11.0916	6.87732	12.1207	15.8659
DOWN	ENSMUSG00000027184	185.134	73.7691	220.023	84.0986	175.491	108.721
CONTROL	ENSMUSG00000027187	34.8919	17.319	34.8507	15.0609	35.5424	13.6469
DOWN	ENSMUSG00000027193	15.5535	17.3627	18.5529	12.5675	19.4133	3.46752
UP	ENSMUSG00000027195	22.8262	21.714	36.8332	28.8195	26.7337	46.0511
DOWN	ENSMUSG00000027203	153.67	134.173	128.143	89.298	208.9	65.3091
CONTROL	ENSMUSG00000027206	6.81635	6.26986	7.85885	6.06354	7.19554	6.14235
CONTROL	ENSMUSG00000027245	265.361	154.714	363.836	165.311	345.684	193.167
CONTROL	ENSMUSG00000027247	7.35129	6.80033	7.34089	6.81056	7.83286	4.93187
CONTROL	ENSMUSG00000027248	89.1835	44.1496	93.0213	45.0467	75.6821	49.1874
UP	ENSMUSG00000027254	3.86133	3.0526	1.83089	2.2984	4.49703	6.26015
CONTROL	ENSMUSG00000027255	10.6934	6.33621	10.5957	7.12624	9.57365	5.97128
CONTROL	ENSMUSG00000027257	16.9252	11.8015	21.7559	13.522	25.6234	18.2705
CONTROL	ENSMUSG00000027274	36.3853	29.2964	39.2831	20.9894	45.6768	19.6881
CONTROL	ENSMUSG00000027282	87.6151	76.4397	104.12	80.3709	108.91	72.6792
DOWN	ENSMUSG00000027285	6.19574	5.47992	6.5492	4.59468	5.60041	3.01744
UP	ENSMUSG00000027287	9.80947	5.06276	11.5539	4.94299	10.243	9.68805
UP	ENSMUSG00000027293	12.8891	8.63939	14.643	10.6563	14.5029	15.6184
DOWN	ENSMUSG00000027298	27.7137	5.54984	27.704	7.97527	15.9102	3.71645
UP	ENSMUSG00000027303	6.32809	3.41713	5.89362	4.75247	8.4923	7.1299
CONTROL	ENSMUSG00000027304	13.2548	15.4705	18.393	15.6624	13.3722	9.27231
DOWN	ENSMUSG00000027306	425.67	409.328	236.395	430.696	304.556	123.923
CONTROL	ENSMUSG00000027313	11.9392	8.50091	4.39989	4.1878	1.60095	7.51431
UP	ENSMUSG00000027315	8.73945	6.17183	22.2078	13.3295	12.4386	15.7688
DOWN	ENSMUSG00000027323	11.167	9.48387	11.5094	9.27575	11.0354	7.93801
DOWN	ENSMUSG00000027327	66.7525	52.9374	59.3153	44.2084	68.7876	18.5563
CONTROL	ENSMUSG00000027330	16.9349	10.5858	21.8531	12.637	16.4605	12.2317
DOWN	ENSMUSG00000027331	7.23424	5.39087	7.48456	5.82395	5.2885	2.21217
CONTROL	ENSMUSG00000027332	33.6334	10.0947	35.9992	20.2919	30.4861	24.6039
CONTROL	ENSMUSG00000027341	10.9462	6.37998	10.4641	5.11376	13.1705	5.81287
DOWN	ENSMUSG00000027342	131.368	128.974	139.875	104.416	137.709	40.5424
DOWN	ENSMUSG00000027349	12.7576	10.8213	14.5813	9.14641	13.3	5.31208
DOWN	ENSMUSG00000027357	8.06637	7.37208	9.1752	4.88827	8.86798	1.63387
CONTROL	ENSMUSG00000027363	10.6408	7.68774	11.7767	7.25112	11.7701	9.95354
UP	ENSMUSG00000027367	16.0015	9.02737	22.5699	13.9016	18.3811	15.0165
UP	ENSMUSG00000027371	1.78172	0.946943	1.77923	1.46813	2.16798	5.63865
CONTROL	ENSMUSG00000027374	185.96	176.154	218.541	212.472	141.76	270.47
DOWN	ENSMUSG00000027379	7.14786	6.43725	7.21713	4.16328	7.34655	2.66681
DOWN	ENSMUSG00000027387	11.1732	11.5295	10.5466	8.36642	8.52614	7.39801
CONTROL	ENSMUSG00000027395	7.20055	5.17511	8.01627	5.1213	5.89047	5.08782
CONTROL	ENSMUSG00000027397	40.5262	19.681	42.2744	19.6477	37.7143	23.297
[truncated: 2,878 more rows]
