# Supplementary material for: Poised PABP-RNA hubs implement signal-dependent mRNA decay in development
Source: Research Square preprint supplement (doi:10.21203/rs.3.rs-3227673/v1), 2023-08-07
Supplement: Supplementary file 3 [file 8a777e21d97098559e39a170.xlsx]

## Sheet: iCLIP Features used for GBM
Supplementary Table 2 | Repository of iCLIP experiments applied for the Gradient boosting machine (GBM) training and model benchmarking .
Protein	Name	Pubmed ID	GEO	Tag	Cell Type	Replicate	Condition/Treatment	Method	SRA ID
Ago2	Ago2_FLAG-HA_mESC_DoxInduced-Ago1to4del-CreER_rep1	25449132	https://www.ncbi.nlm.nih.gov/geo/query/acc.cgi?acc=GSE61348	FLAG-HA	mESC	1	DoxInduced-Ago1to4del-CreER	iCLIP	SRX699613
Ago2	Ago2_NoTag_mESC_DoxInduced-Ago1to4del-CreER_rep1	25449132	https://www.ncbi.nlm.nih.gov/geo/query/acc.cgi?acc=GSE61348	NoTag	mESC	1	DoxInduced-Ago1to4del-CreER	iCLIP	SRX699614
Ago2	Ago2_NoTag_129/B6-mESC_WT_rep1	21258322	https://www.ncbi.nlm.nih.gov/geo/query/acc.cgi?acc=GSE25310	NoTag	129/B6-mESC	1	WT	CLIPseq	SRX031189
Ago2	Ago2_NoTag_129/B6-mESC_WT_rep1	21258322	https://www.ncbi.nlm.nih.gov/geo/query/acc.cgi?acc=GSE25310	NoTag	129/B6-mESC	1	WT	CLIPseq	SRX031191
Ago2	Ago2_NoTag_129/B6-mESC_Dicer-KO_rep1	21258322	https://www.ncbi.nlm.nih.gov/geo/query/acc.cgi?acc=GSE25310	NoTag	129/B6-mESC	1	Dicer-KO	CLIPseq	SRX031192
Ago2	Ago2_NoTag_129/B6-mESC_Dicer-KO_rep2	21258322	https://www.ncbi.nlm.nih.gov/geo/query/acc.cgi?acc=GSE25310	NoTag	129/B6-mESC	2	Dicer-KO	CLIPseq	SRX031193
CBX7	CBX7_Biotag_CAST/Eix129/Sv/Jae-female-mESC_BirA_rep1	29073373	https://www.ncbi.nlm.nih.gov/geo/query/acc.cgi?acc=GSE88823	Biotag	CAST/Eix129/Sv/Jae-female-mESC	1	BirA	dCLIP	SRX2249077
CBX7	CBX7_Biotag_CAST/Eix129/Sv/Jae-female-mESC_BirA_rep2	29073373	https://www.ncbi.nlm.nih.gov/geo/query/acc.cgi?acc=GSE88823	Biotag	CAST/Eix129/Sv/Jae-female-mESC	2	BirA	dCLIP	SRX2249079
CBX7	CBX7_Biotag_CAST/Eix129/Sv/Jae-female-mESC_BirA_rep3	29073373	https://www.ncbi.nlm.nih.gov/geo/query/acc.cgi?acc=GSE88823	Biotag	CAST/Eix129/Sv/Jae-female-mESC	3	BirA	dCLIP	SRX2249080
CPEB1	merge_iCLIP_CPEB	inhouse		noTag	mESC	1	WT	iCLIP	inhouse
CSTF64	iCLIP_CSTF64	inhouse		noTag	mESC	1	WT	iCLIP	inhouse
DAZL	Dazl_NoTag_mESC	Biorxiv	https://www.ebi.ac.uk/arrayexpress/experiments/E-MTAB-9332/files/	noTag	mESC	2	WT	iCLIP	E-MTAB-9332
DDX18	DDX18_Flag-biotin_129S1/SVImJ mESC_serum+LIF_rep1	31914400	https://www.ncbi.nlm.nih.gov/geo/query/acc.cgi?acc=GSE124580	Flag-biotin	129S1/SVImJ mESC	1	serum+LIF	CLIP/TAP-seq	SRX5195354
DDX18	DDX18_Flag-biotin_129S1/SVImJ mESC_serum+LIF_rep2	31914400	https://www.ncbi.nlm.nih.gov/geo/query/acc.cgi?acc=GSE124580	Flag-biotin	129S1/SVImJ mESC	2	serum+LIF	CLIP/TAP-seq	SRX5195355
DDX5	Ddx5 PAR-CLIP-ES-rep1	not yet in PubMed: https://advances.sciencemag.org/content/6/24/eaba0777	https://www.ncbi.nlm.nih.gov/geo/query/acc.cgi?acc=GSE125644	NoTag	mESC	1		PAR-CLIP	SRX5291005
DDX5	Ddx5 PAR-CLIP-ES-rep2	not yet in PubMed: https://advances.sciencemag.org/content/6/24/eaba0777	https://www.ncbi.nlm.nih.gov/geo/query/acc.cgi?acc=GSE125644	NoTag	mESC	2		PAR-CLIP	SRX5291006
EZH2	EZH2_HA_129/Ola-E14-mESC_WT_rep1	24141703	https://www.ncbi.nlm.nih.gov/geo/query/acc.cgi?acc=GSE49433	HA	129/Ola-E14-mESC	1	WT	PAR-CLIP	SRX333083
EZH2	EZH2_HA_129/Ola-E14-mESC_WT_rep2	24141703	https://www.ncbi.nlm.nih.gov/geo/query/acc.cgi?acc=GSE49433	HA	129/Ola-E14-mESC	2	WT	PAR-CLIP	SRX333084
EZH2	EZH2_HA_129/Ola-E14-mESC_WT_rep3	24141703	https://www.ncbi.nlm.nih.gov/geo/query/acc.cgi?acc=GSE49433	HA	129/Ola-E14-mESC	3	WT	PAR-CLIP	SRX333085
EZH2	EZH2_HA_129/Ola-E14-mESC_WT_rep4	24141703	https://www.ncbi.nlm.nih.gov/geo/query/acc.cgi?acc=GSE49433	HA	129/Ola-E14-mESC	4	WT	PAR-CLIP	SRX333086
Fam120a	Fam120a_FLAG-HA_mESC_DoxInduced_rep1	31289130	https://www.ncbi.nlm.nih.gov/geo/query/acc.cgi?acc=GSE128264	FLAG-HA	mESC	1	DoxInduced	iCLIP	SRX5516752
Fam120a	Fam120a_NoTag_mESC_DoxInduced_rep1	31289130	https://www.ncbi.nlm.nih.gov/geo/query/acc.cgi?acc=GSE128264	NoTag	mESC	1	DoxInduced	iCLIP	SRX5516753
FBL	FBL_ESC	inhouse			v6.5 mESC	1	WT	inhouse
FUS	FUS_NoTag_mESC_Ezh2-floxed-no-tamoxifen_rep1	27197219	https://www.ncbi.nlm.nih.gov/geo/query/acc.cgi?acc=GSE66831	NoTag	mESC	1	Ezh2-floxed-no-tamoxifen	iCLIP	SRX955420
hnRNPA1	iCLIP_hnRNPA1	inhouse			IDG3.2 mESC	1	WT	iCLIP
HNRNPC	HNRNPC_NoTag_mESC_Ezh2-floxed-no-tamoxifen_rep1	27197219	https://www.ncbi.nlm.nih.gov/geo/query/acc.cgi?acc=GSE66831	NoTag	mESC	1	Ezh2-floxed-no-tamoxifen	iCLIP	SRX955421
hRBFOX2	hRBFOX2_NoTag_v6.5 mESC_DoxInduced_rep1	24637117	https://www.ncbi.nlm.nih.gov/geo/query/acc.cgi?acc=GSE54794	NoTag	v6.5 mESC	1	DoxInduced	iCLIP	SRX467562
hRBFOX2	hRBFOX2_FLAG-HA_v6.5 mESC_DoxInduced_rep1	24637117	https://www.ncbi.nlm.nih.gov/geo/query/acc.cgi?acc=GSE54794	FLAG-HA	v6.5 mESC	1	DoxInduced	iCLIP	SRX467563
HuR	HuR_NoTag_v6.5-mESC_WT_rep1	25799993	https://www.ncbi.nlm.nih.gov/geo/query/acc.cgi?acc=GSE64168	NoTag	v6.5-mESC	1	WT	iCLIP	SRX810308
HuR	HuR_NoTag_v6.5-mESC_WT_rep2	25799993	https://www.ncbi.nlm.nih.gov/geo/query/acc.cgi?acc=GSE64168	NoTag	v6.5-mESC	2	WT	iCLIP	SRX810309
IDH1	IDH1_3XFLAG-biotin_mESC_WT_rep1	30698743	https://www.ncbi.nlm.nih.gov/geo/query/acc.cgi?acc=GSE119798	3XFLAG-biotin	mESC	1	WT	CLIPseq	SRX4670596
IDH1	IDH1_3XFLAG-biotin_mESC_WT_rep2	30698743	https://www.ncbi.nlm.nih.gov/geo/query/acc.cgi?acc=GSE119798	3XFLAG-biotin	mESC	2	WT	CLIPseq	SRX4670597
IDH1	IDH1_3XFLAG-biotin_mESC_WT_rep3	30698743	https://www.ncbi.nlm.nih.gov/geo/query/acc.cgi?acc=GSE119798	3XFLAG-biotin	mESC	3	WT	CLIPseq	SRX4670598
Jarid2	Jarid2_NoTag_E14-mESC_WT_rep1	5170018	https://www.ncbi.nlm.nih.gov/geo/query/acc.cgi?acc=GSE60516	NoTag	E14-mESC	1	WT	PAR-CLIP	SRX704269
Jarid2	Jarid2_NoTag_E14-mESC_WT_rep2	5170018	https://www.ncbi.nlm.nih.gov/geo/query/acc.cgi?acc=GSE60516	NoTag	E14-mESC	2	WT	PAR-CLIP	SRX704270
Jarid2	Jarid2_NoTag_E14-mESC_WT_rep3	5170018	https://www.ncbi.nlm.nih.gov/geo/query/acc.cgi?acc=GSE60516	NoTag	E14-mESC	3	WT	PAR-CLIP	SRX704271
Jarid2	Jarid2_NoTag_E14-mESC_2uM-RA-24hrs_rep1	5170018	https://www.ncbi.nlm.nih.gov/geo/query/acc.cgi?acc=GSE60516	NoTag	E14-mESC	1	2uM-RA-24hrs	PAR-CLIP	SRX704272
Jarid2	Jarid2_NoTag_E14-mESC_2uM-RA-24hrs_rep2	5170018	https://www.ncbi.nlm.nih.gov/geo/query/acc.cgi?acc=GSE60516	NoTag	E14-mESC	2	2uM-RA-24hrs	PAR-CLIP	SRX704273
Jarid2	Jarid2_NoTag_E14-mESC_2uM-RA-24hrs_rep3	5170018	https://www.ncbi.nlm.nih.gov/geo/query/acc.cgi?acc=GSE60516	NoTag	E14-mESC	3	2uM-RA-24hrs	PAR-CLIP	SRX704274
LIN28A	LIN28A_NoTag_A3-1-mESC_Antibody35L33G_rep1	23102813	https://www.ncbi.nlm.nih.gov/geo/query/acc.cgi?acc=GSE37111	NoTag	A3-1-mESC	1	Antibody35L33G	CLIPseq	SRX137372
LIN28A	LIN28A_NoTag_A3-1-mESC_Antibody2J3_rep1	23102813	https://www.ncbi.nlm.nih.gov/geo/query/acc.cgi?acc=GSE37111	NoTag	A3-1-mESC	1	Antibody2J3	CLIPseq	SRX137373
LIN28A	LIN28A_NoTag_A3-1-mESC_PolyclonalAntibody_rep1	23102813	https://www.ncbi.nlm.nih.gov/geo/query/acc.cgi?acc=GSE37111	NoTag	A3-1-mESC	1	PolyclonalAntibody	CLIPseq	SRX137374
LIN28A	LIN28A_NoTag-mESC_AntibodyA177_rep1			NoTag	v6.5 mESC	1	WT	iCLIP	inhouse
LIN28A	LIN28A_NoTag-mESC_AntibodyA177_rep2			NoTag	v6.5 mESC	2	WT	iCLIP	inhouse
LIN28A	LIN28A_NoTag-mESC_AntibodyA177_rep3			NoTag	v6.5 mESC	3	WT	iCLIP	inhouse
LIN28A	LIN28A_NoTag-mESC_AntibodyA177_rep4			NoTag	v6.5 mESC	4	WT	iCLIP	inhouse
LIN28A	LIN28A_NoTag-mESC_AntibodyA177_rep5			NoTag	v6.5-mESC	5	WT	iCLIP	inhouse
LIN28A	LIN28A_NoTag-mESC_AntibodyA177_rep6			NoTag	v6.5-mESC	6	WT	iCLIP	inhouse
Nacc1	Nacc1_NoTag_N2A_WT_rep1	28575669	https://www.ncbi.nlm.nih.gov/geo/query/acc.cgi?acc=GSE80205	NoTag	N2A	1	WT	iCLIP	SRX2415967
Nacc1	Nacc1_NoTag_N2A_WT_rep2	28575669	https://www.ncbi.nlm.nih.gov/geo/query/acc.cgi?acc=GSE80205	NoTag	N2A	2	WT	iCLIP	SRX2415968
NPM1	NPM1_NoTag_C57/BJ6-MEF_Trp53del-Trp53del-Npm1del_rep1	31570891	https://www.ncbi.nlm.nih.gov/geo/query/acc.cgi?acc=GSE135724	NoTag	C57/BJ6-MEF	1	Trp53del-Trp53del-Npm1del	HITS-CLIP	SRX6701148
PABP	PABP1_ESC_rep1	inhouse		NoTag	v6.5 mESC	1	WT	iCLIP	inhouse
PABP	PABP1_ESC_rep2	inhouse		NoTag	v6.5 mESC	2	WT	iCLIP	inhouse
PKM	PKM_FLAG-HA_E14-mESC_WT_rep1	28575669	https://www.ncbi.nlm.nih.gov/geo/query/acc.cgi?acc=GSE96998	FLAG-HA	E14-mESC	1	WT	iCLIP	SRX2671514
PKM	PKM_FLAG-HA_E14-mESC_WT_rep2	28575669	https://www.ncbi.nlm.nih.gov/geo/query/acc.cgi?acc=GSE96998	FLAG-HA	E14-mESC	2	WT	iCLIP	SRX2671515
PRPF8	PRPF8_ESC_rep1	inhouse		NoTag	mESC	1	WT	iCLIP	inhouse
PRPF8	PRPF8_ESC_rep2	inhouse		NoTag	mESC	2	WT	iCLIP	inhouse
PRPF8	PRPF8_ESC_rep3	inhouse		NoTag	mESC	3	WT	iCLIP	inhouse
PRPF8	PRPF8_ESC_rep4	inhouse		NoTag	mESC	4	WT	iCLIP	inhouse
PSPC1	PSPC1_3XFLAG_J1-mESC_WT_rep1	29483655	https://www.ncbi.nlm.nih.gov/geo/query/acc.cgi?acc=GSE103268	3XFLAG	J1-mESC	1	WT	CLIPseq	SRX3145856
PTBP1	PTBP1_NoTag_46C-mESC_WT_rep1	26705333	https://www.ncbi.nlm.nih.gov/geo/query/acc.cgi?acc=GSE71178	NoTag	46C-mESC	1	WT	iCLIP	SRX1114455
PTBP1	PTBP1_NoTag_46C-mNPC_WT_rep1	26705333	https://www.ncbi.nlm.nih.gov/geo/query/acc.cgi?acc=GSE71178	NoTag	46C-mNPC	1	WT	iCLIP	SRX1114456
SmB	mESC_SmB-Ctrl_rep1	inhouse			mESC	1	WT	iCLIP	inhouse
SmB	mESC_SmB_rep1	inhouse				2	WT	iCLIP	inhouse
SKIV2L	SKIV2L__mESC__rep1	32048998	https://www.ncbi.nlm.nih.gov/geo/query/acc.cgi?acc=GSE134020	xFLAG-Avi	mESC	1	WT	CRAC	SRX6420397
SKIV2L	SKIV2L__mESC__rep2	32048998	https://www.ncbi.nlm.nih.gov/geo/query/acc.cgi?acc=GSE134020	xFLAG-Avi	mESC	2	WT	CRAC	SRX6420398
SKIV2L	SKIV2L__mESC__rep3	32048998	https://www.ncbi.nlm.nih.gov/geo/query/acc.cgi?acc=GSE134020	xFLAG-Avi	mESC	3	WT	CRAC	SRX6420399
SKIV2L	SKIV2L__mESC__rep4	32048998	https://www.ncbi.nlm.nih.gov/geo/query/acc.cgi?acc=GSE134020	xFLAG-Avi	mESC	4	WT	CRAC	SRX6420400
SKIV2L	SKIV2L__mESC__rep5	32048998	https://www.ncbi.nlm.nih.gov/geo/query/acc.cgi?acc=GSE134020	xFLAG-Avi	mESC	5	WT	CRAC	SRX6420403
SKIV2L	SKIV2L__mESC__rep6	32048998	https://www.ncbi.nlm.nih.gov/geo/query/acc.cgi?acc=GSE134020	xFLAG-Avi	mESC	6	WT	CRAC	SRX6420404
SKIV2L	SKIV2L__mESC__rep7	32048998	https://www.ncbi.nlm.nih.gov/geo/query/acc.cgi?acc=GSE134020	xFLAG-Avi	mESC	7	WT	CRAC	SRX6452222
SKIV2L	SKIV2L__mESC__rep8	32048998	https://www.ncbi.nlm.nih.gov/geo/query/acc.cgi?acc=GSE134020	xFLAG-Avi	mESC	8	WT	CRAC	SRX6452233
SKIV2L	SKIV2L__mESC__rep9	32048998	https://www.ncbi.nlm.nih.gov/geo/query/acc.cgi?acc=GSE134020	xFLAG-Avi	mESC	9	WT	CRAC	SRX6452218
SKIV2L	SKIV2L__mESC__rep10	32048998	https://www.ncbi.nlm.nih.gov/geo/query/acc.cgi?acc=GSE134020	xFLAG-Avi	mESC	10	WT	CRAC	SRX6452210
SKIV2L	SKIV2L__mESC__rep11	32048998	https://www.ncbi.nlm.nih.gov/geo/query/acc.cgi?acc=GSE134020	xFLAG-Avi	mESC	11	WT	CRAC	SRX6452189
SRSF3	SRSF3_mESC	29741478	https://icount.biolab.si	NoTag	mESC	1	WT	iCLIP	20160219_Anko (DOI: 10.7554/eLife.37419)
SRSF3	SRSF3-GFP_mESC_rep1	29741478	https://icount.biolab.si	GFP-Tag	mESC	1	SRSF3-GFP-overexpression	iCLIP	20160219_Anko (DOI: 10.7554/eLife.37419)
SRSF3	SRSF3-GFP_mESC_rep2	29741478	https://icount.biolab.si	GFP-Tag	mESC	2	SRSF3-GFP-overexpression	iCLIP	20160219_Anko (DOI: 10.7554/eLife.37419)
TARDBP	TARDBP_GFP_mESC_p2lox_TDP43-GFP	31047794	https://www.ebi.ac.uk/arrayexpress/experiments/E-MTAB-5100	GFP-Tag	mESC	1	TARDBP-GFP	iCLIP	ERR3237579
TARDBP	TARDBP_mESC_p2lox_TARDBP_GFP	31047794	https://www.ebi.ac.uk/arrayexpress/experiments/E-MTAB-5100	NoTag	mESC	1	TARDBP-GFP	iCLIP	ERR3237580
SAM68	mES_Sam68_iCLIP	inhouse		NoTag	mESC	1	WT	iCLIP
SAM68	mES_Sam68_iCLIP	inhouse		NoTag	mESC	2	WT	iCLIP
Suz12	Suz12_NoTag_mESC_Ezh2-floxed-no-tamoxifen_rep1	27197219	https://www.ncbi.nlm.nih.gov/geo/query/acc.cgi?acc=GSE66831	NoTag	mESC	1	Ezh2-floxed-no-tamoxifen	iCLIP	SRX955412
Suz12	Suz12_NoTag_mESC_Ezh2-floxed-no-tamoxifen_rep2	27197219	https://www.ncbi.nlm.nih.gov/geo/query/acc.cgi?acc=GSE66831	NoTag	mESC	2	Ezh2-floxed-no-tamoxifen	iCLIP	SRX955413
Suz12	Suz12_NoTag_mESC_Ezh2-floxed-no-tamoxifen_rep3	27197219	https://www.ncbi.nlm.nih.gov/geo/query/acc.cgi?acc=GSE66831	NoTag	mESC	3	Ezh2-floxed-no-tamoxifen	iCLIP	SRX955414
Suz12	Suz12_NoTag_mESC_Ezh2-floxed-no-tamoxifen_rep4	27197219	https://www.ncbi.nlm.nih.gov/geo/query/acc.cgi?acc=GSE66831	NoTag	mESC	4	Ezh2-floxed-no-tamoxifen	iCLIP	SRX1092541
Suz12	Suz12_NoTag_mESC_Ezh2-floxed-no-tamoxifen_rep5	27197219	https://www.ncbi.nlm.nih.gov/geo/query/acc.cgi?acc=GSE66831	NoTag	mESC	5	Ezh2-floxed-no-tamoxifen	iCLIP	SRX1092542
Suz12	Suz12_NoTag_mESC_Ezh2-floxed-no-tamoxifen_rep6	27197219	https://www.ncbi.nlm.nih.gov/geo/query/acc.cgi?acc=GSE66831	NoTag	mESC	6	Ezh2-floxed-no-tamoxifen	iCLIP	SRX1471699
UPF1	UPF1_NoTag_v6.5-mESC_WT_rep1	23766421	https://www.ncbi.nlm.nih.gov/geo/query/acc.cgi?acc=GSE41785	NoTag	v6.5-mESC	1	WT	CLIPseq	SRX200662
UPF1	UPF1_NoTag_v6.5-mESC_WT_rep2	23766421	https://www.ncbi.nlm.nih.gov/geo/query/acc.cgi?acc=GSE41785	NoTag	v6.5-mESC	2	WT	CLIPseq	SRX200663
UPF1	UPF1_NoTag_v6.5-mESC_WT_rep1	23766421	https://www.ncbi.nlm.nih.gov/geo/query/acc.cgi?acc=GSE41785	NoTag	v6.5-mESC	1	WT	CLIPseq	SRX200664
UPF1	UPF1_NoTag_v6.5-mESC_CHX_rep1	23766421	https://www.ncbi.nlm.nih.gov/geo/query/acc.cgi?acc=GSE41785	NoTag	v6.5-mESC	1	CHX	CLIPseq	SRX200665
UPF1	UPF1_NoTag_v6.5-mESC_CHX_rep2	23766421	https://www.ncbi.nlm.nih.gov/geo/query/acc.cgi?acc=GSE41785	NoTag	v6.5-mESC	2	CHX	CLIPseq	SRX200666
XRN1	XRN1__mESC__rep1	32048998	https://www.ncbi.nlm.nih.gov/geo/query/acc.cgi?acc=GSE134020	xFLAG-Avi	mESC	1	WT	CRAC	SRX6420413
XRN1	XRN1__mESC__rep2	32048998	https://www.ncbi.nlm.nih.gov/geo/query/acc.cgi?acc=GSE134020	xFLAG-Avi	mESC	2	WT	CRAC	SRX6420414
XRN1	XRN1__mESC__rep3	32048998	https://www.ncbi.nlm.nih.gov/geo/query/acc.cgi?acc=GSE134020	xFLAG-Avi	mESC	3	WT	CRAC	SRX6420415
XRN1	XRN1__mESC__rep4	32048998	https://www.ncbi.nlm.nih.gov/geo/query/acc.cgi?acc=GSE134020	xFLAG-Avi	mESC	4	WT	CRAC	SRX6420416
XRN1	XRN1__mESC__rep5	32048998	https://www.ncbi.nlm.nih.gov/geo/query/acc.cgi?acc=GSE134020	xFLAG-Avi	mESC	5	WT	CRAC	SRX6420417
XRN1	XRN1__mESC__rep6	32048998	https://www.ncbi.nlm.nih.gov/geo/query/acc.cgi?acc=GSE134020	xFLAG-Avi	mESC	6	WT	CRAC	SRX6452193
XRN1	XRN1__mESC__rep7	32048998	https://www.ncbi.nlm.nih.gov/geo/query/acc.cgi?acc=GSE134020	xFLAG-Avi	mESC	7	WT	CRAC	SRX6452200
YTHDF2	YTHDF2__mESC__rep1	inhouse		NoTag	mESC	1	WT	iCLIP	inhouse
Zfp871	Zfp871_FLAG_N2A_DoxInduced_rep1	28575669	https://www.ncbi.nlm.nih.gov/geo/query/acc.cgi?acc=GSE80205	FLAG	N2A	1	DoxInduced	iCLIP	SRX1700553
Zfp871	Zfp871_FLAG_N2A_DoxInduced_rep2	28575669	https://www.ncbi.nlm.nih.gov/geo/query/acc.cgi?acc=GSE80205	FLAG	N2A	2	DoxInduced	iCLIP	SRX1700554
Zfp871	Zfp871_FLAG_N2A_DoxInduced_rep1	28575669	https://www.ncbi.nlm.nih.gov/geo/query/acc.cgi?acc=GSE80205	FLAG	N2A	1	DoxInduced	iCLIP	SRX1700551
Zfp871	Zfp871_FLAG_N2A_DoxInduced_rep2	28575669	https://www.ncbi.nlm.nih.gov/geo/query/acc.cgi?acc=GSE80205	FLAG	N2A	2	DoxInduced	iCLIP	SRX1700552

## Sheet: Ranking of all half-lifes
id	delta	Sample comparison	rank	UP (KO)	DOWN (WT)	KO_smooth	model
chr3_5751137_5751295_Gm8797	9.16182	KO	1	0.260057	0.739943	0.513233	iclipFeatures
chr9_44403756_44404329_Trappc4	8.22309	KO	2	0.482478	0.517522	0.548061	iclipFeatures
chr1_180600531_180601255_Parp1	8.01019	KO	3	0.758638	0.241362	0.57489	iclipFeatures
chr18_32865780_32866420_Wdr36	7.81393	KO	4	0.66158	0.33842	0.595307	iclipFeatures
chr17_35956813_35957422_Abcf1	7.66048	KO	5	0.26453	0.73547	0.611856	iclipFeatures
chr7_127214439_127214757_Sept1	7.64439	KO	6	0.652114	0.347886	0.628218	iclipFeatures
chr8_110810238_110810940_Sf3b3	7.37454	KO	7	0.75703	0.24297	0.645737	iclipFeatures
chr11_116021911_116023609_H3f3b	6.96821	KO	8	0.762697	0.237303	0.644982	iclipFeatures
chr5_143503633_143506974_Rac1	6.90571	KO	9	0.758638	0.241362	0.644311	iclipFeatures
chr5_142903114_142903797_Actb	6.89334	KO	10	0.760794	0.239206	0.684016	iclipFeatures
chr12_70994251_70996347_Psma3	6.65041	KO	11	0.423683	0.576317	0.694884	iclipFeatures
chr7_5079316_5079945_U2af2	6.59974	KO	12	0.657668	0.342332	0.658581	iclipFeatures
chr5_147110652_147111597_Polr1d	6.58979	KO	13	0.75109	0.24891	0.648973	iclipFeatures
chr4_139101813_139104043_Minos1	6.58697	KO	14	0.654869	0.345131	0.647539	iclipFeatures
chr12_85340613_85343427_Tmed10	6.46104	KO	15	0.66158	0.33842	0.597465	iclipFeatures
chr3_103056933_103058188_Csde1	6.40298	KO	16	0.760794	0.239206	0.63096	iclipFeatures
chr5_110170904_110171973_Chfr	6.3807	KO	17	0.394001	0.605999	0.635143	iclipFeatures
chr2_84669074_84669465_Selenoh	6.20305	KO	18	0.666609	0.333391	0.597129	iclipFeatures
chr11_30879663_30880361_Psme4	6.12916	KO	19	0.744299	0.255701	0.59395	iclipFeatures
chr17_28330783_28331034_Rpl10a	6.1162	KO	20	0.260057	0.739943	0.601958	iclipFeatures
chr4_46472154_46472657_Anp32b	6.10448	KO	21	0.758638	0.241362	0.602032	iclipFeatures
chr14_12237873_12242041_Ptprg	6.07479	KO	22	0.699498	0.300502	0.588715	iclipFeatures
chr2_155819831_155820101_Eif6	6.04718	KO	23	0.370943	0.629057	0.597918	iclipFeatures
chr10_80392538_80393099_Mbd3	5.95318	KO	24	0.623085	0.376915	0.567123	iclipFeatures
chr9_57790352_57792515_Arid3b	5.91554	KO	25	0.74166	0.25834	0.617387	iclipFeatures
chr15_36770261_36772717_Ywhaz	5.86529	KO	26	0.761527	0.238473	0.578617	iclipFeatures
chr19_5464802_5465053_Fibp	5.84045	KO	27	0.260833	0.739167	0.583776	iclipFeatures
chr12_8937977_8938742_Laptm4a	5.74499	KO	28	0.758638	0.241362	0.622336	iclipFeatures
chr11_73135483_73135996_Gsg2	5.72017	KO	29	0.436347	0.563653	0.635638	iclipFeatures
chr11_20224845_20226857_Rab1a	5.69804	KO	30	0.762697	0.237303	0.608432	iclipFeatures
chr1_133382299_133383924_Sox13	5.68459	KO	31	0.370943	0.629057	0.604461	iclipFeatures
chr4_42979962_42980566_Vcp	5.62463	KO	32	0.75109	0.24891	0.620379	iclipFeatures
chr9_14833648_14837126_Mre11a	5.6061	KO	33	0.756543	0.243457	0.610144	iclipFeatures
chr6_146602275_146603758_Tm7sf3	5.58968	KO	34	0.756099	0.243901	0.625522	iclipFeatures
chr7_3640922_3642486_Prpf31	5.53387	KO	35	0.469601	0.530399	0.625116	iclipFeatures
chr9_114746576_114749347_Cmtm6	5.48939	KO	36	0.721816	0.278184	0.663799	iclipFeatures
chr18_36666680_36667593_Sra1	5.47691	KO	37	0.420017	0.579983	0.633059	iclipFeatures
chr8_71465463_71465753_Mrpl34	5.3981	KO	38	0.656284	0.343716	0.633484	iclipFeatures
chr17_35253430_35253707_Ddx39b	5.38912	KO	39	0.590128	0.409872	0.613516	iclipFeatures
chr17_24073679_24079120_Pdpk1	5.33752	KO	40	0.758638	0.241362	0.622496	iclipFeatures
chr13_81673836_81676035_Polr3g	5.33494	KO	41	0.757771	0.242229	0.606668	iclipFeatures
chr11_96937815_96938914_Pnpo	5.28908	KO	42	0.443691	0.556309	0.590672	iclipFeatures
chr1_131931001_131936322_Nucks1	5.25135	KO	43	0.760794	0.239206	0.600908	iclipFeatures
chr10_110939244_110939599_Csrp2	5.24001	KO	44	0.55642	0.44358	0.617974	iclipFeatures
chr13_66997077_66998401_Ptdss1	5.23343	KO	45	0.559402	0.440598	0.611654	iclipFeatures
chr13_65064662_65066612_Mfsd14b	5.22623	KO	46	0.563537	0.436463	0.611741	iclipFeatures
chr17_35655633_35656639_Vars2	5.20158	KO	47	0.260057	0.739943	0.593377	iclipFeatures
chrX_151934383_151935417_Huwe1	5.17746	KO	48	0.758638	0.241362	0.581422	iclipFeatures
chr13_47084766_47086067_Dek	5.14464	KO	49	0.760794	0.239206	0.601909	iclipFeatures
chr18_67653898_67654178_Psmg2	5.1363	KO	50	0.695435	0.304565	0.593513	iclipFeatures
chr6_29540825_29541866_Tnpo3	5.11166	KO	51	0.758638	0.241362	0.613023	iclipFeatures
chr15_34440504_34440759_Rpl30	5.08012	KO	52	0.260057	0.739943	0.622124	iclipFeatures
chr9_92607230_92608428_Plod2	5.04886	KO	53	0.641242	0.358758	0.572266	iclipFeatures
chr14_46808148_46811751_Gmfb	5.04158	KO	54	0.761287	0.238713	0.571131	iclipFeatures
chr5_122174144_122175273_Ppp1cc	5.03561	KO	55	0.475442	0.524558	0.577525	iclipFeatures
chr15_37967327_37968292_Ubr5	5.02279	KO	56	0.758638	0.241362	0.546927	iclipFeatures
chr15_79029306_79030500_H1f0	4.95524	KO	57	0.351068	0.648932	0.585562	iclipFeatures
chrX_71559804_71560676_Hmgb3	4.94823	KO	58	0.260057	0.739943	0.597517	iclipFeatures
chr11_117813390_117814288_Syngr2	4.94361	KO	59	0.749448	0.250552	0.597252	iclipFeatures
chr7_45125556_45126166_Rpl13a	4.93422	KO	60	0.759376	0.240624	0.596668	iclipFeatures
chr4_141066511_141067563_Necap2	4.92888	KO	61	0.452653	0.547347	0.59497	iclipFeatures
chr15_79720099_79721479_Gtpbp1	4.90833	KO	62	0.646405	0.353595	0.585869	iclipFeatures
chr3_121457426_121458207_Cnn3	4.90599	KO	63	0.760794	0.239206	0.606331	iclipFeatures
chr2_23196823_23199260_Yme1l1	4.9027	KO	64	0.758638	0.241362	0.607539	iclipFeatures
chr5_115240716_115240991_Pop5	4.89547	KO	65	0.469601	0.530399	0.606984	iclipFeatures
chr2_32963793_32964496_Rpl12	4.89391	KO	66	0.74166	0.25834	0.627486	iclipFeatures
chr8_111139519_111139777_Pdpr	4.88452	KO	67	0.260057	0.739943	0.632281	iclipFeatures
chr6_83768881_83771187_Tex261	4.8796	KO	68	0.464681	0.535319	0.618027	iclipFeatures
chr2_160721554_160722764_Top1	4.86116	KO	69	0.761527	0.238473	0.568169	iclipFeatures
chr13_54106603_54108346_Sfxn1	4.76771	KO	70	0.753824	0.246176	0.590645	iclipFeatures
chr10_79967426_79969246_Wdr18	4.73885	KO	71	0.657668	0.342332	0.559337	iclipFeatures
chr18_67404761_67405277_Afg3l2	4.73528	KO	72	0.694364	0.305636	0.608901	iclipFeatures
chr2_75665286_75669407_Hnrnpa3	4.7209	KO	73	0.618252	0.381748	0.638512	iclipFeatures
chrX_8193845_8194175_Porcn	4.70302	KO	74	0.260057	0.739943	0.631903	iclipFeatures
chr2_25350565_25352213_Man1b1	4.67396	KO	75	0.694364	0.305636	0.594156	iclipFeatures
chr2_130553384_130554300_Ptpra	4.65453	KO	76	0.428575	0.571425	0.592798	iclipFeatures
chrX_136732941_136733610_Morf4l2	4.65278	KO	77	0.755698	0.244302	0.598307	iclipFeatures
chr13_58391131_58392442_Hnrnpk	4.65172	KO	78	0.760794	0.239206	0.576084	iclipFeatures
chr1_143806689_143807466_Uchl5	4.63064	KO	79	0.695435	0.304565	0.626348	iclipFeatures
chr3_63380332_63386030_Mme	4.62579	KO	80	0.376354	0.623646	0.61922	iclipFeatures
chr4_56749679_56751651_Ikbkap	4.60947	KO	81	0.644092	0.355908	0.650625	iclipFeatures
chr1_170874184_170874491_Dusp12	4.60605	KO	82	0.749448	0.250552	0.651325	iclipFeatures
chr15_102176997_102177612_Csad	4.57638	KO	83	0.396023	0.603977	0.61234	iclipFeatures
chr2_153766930_153773314_Mapre1	4.56811	KO	84	0.762697	0.237303	0.58889	iclipFeatures
chr6_142361375_142362719_Recql	4.56625	KO	85	0.623085	0.376915	0.581603	iclipFeatures
chr2_119584694_119587027_Chp1	4.55512	KO	86	0.742628	0.257372	0.593273	iclipFeatures
chr2_102300118_102304476_Trim44	4.55311	KO	87	0.762697	0.237303	0.594192	iclipFeatures
chr12_31958475_31960388_Prkar2b	4.53798	KO	88	0.370943	0.629057	0.613984	iclipFeatures
chr14_13949011_13949392_Thoc7	4.53196	KO	89	0.46093	0.53907	0.613794	iclipFeatures
chr14_57916261_57917267_Micu2	4.52838	KO	90	0.303482	0.696518	0.627565	iclipFeatures
chr7_16915376_16917057_Calm3	4.52753	KO	91	0.760794	0.239206	0.628247	iclipFeatures
chr6_85928862_85930284_Tprkb	4.52477	KO	92	0.758638	0.241362	0.627547	iclipFeatures
chr14_60300521_60302371_Mtmr6	4.51957	KO	93	0.593947	0.406053	0.624229	iclipFeatures
chr6_67283959_67297736_Serbp1	4.5185	KO	94	0.760794	0.239206	0.644252	iclipFeatures
chr1_93405939_93408172_Hdlbp	4.51301	KO	95	0.760794	0.239206	0.650998	iclipFeatures
chr3_40977227_40978165_Larp1b	4.50813	KO	96	0.749448	0.250552	0.625566	iclipFeatures
chr4_149328415_149329675_Ube4b	4.50403	KO	97	0.755698	0.244302	0.619578	iclipFeatures
chr5_35612134_35613801_Acox3	4.49384	KO	98	0.337766	0.662234	0.615519	iclipFeatures
chr14_118977952_118981702_Dnajc3	4.48448	KO	99	0.661159	0.338841	0.615303	iclipFeatures
chr1_179686677_179687189_Sccpdh	4.45557	KO	100	0.370943	0.629057	0.589904	iclipFeatures
chr9_21506402_21507146_Dnm2	4.44149	KO	101	0.506471	0.493529	0.574451	iclipFeatures
chr4_14809497_14811663_Otud6b	4.41946	KO	102	0.698762	0.301238	0.574961	iclipFeatures
chr18_67488208_67491290_Spire1	4.41343	KO	103	0.553351	0.446649	0.617263	iclipFeatures
chrX_136271665_136271978_Bex3	4.40814	KO	104	0.758638	0.241362	0.627227	iclipFeatures
chr2_60750192_60752982_Rbms1	4.38636	KO	105	0.506803	0.493197	0.646444	iclipFeatures
chr4_101151973_101153494_Jak1	4.37536	KO	106	0.594919	0.405081	0.67166	iclipFeatures
chr4_55389997_55392237_Rad23b	4.37143	KO	107	0.760794	0.239206	0.645419	iclipFeatures
chr11_51600092_51601741_Hnrnpab	4.36272	KO	108	0.760794	0.239206	0.666236	iclipFeatures
chr4_129847822_129850003_Ptp4a2	4.35507	KO	109	0.760794	0.239206	0.665983	iclipFeatures
chr18_53220250_53220860_Snx2	4.35462	KO	110	0.563111	0.436889	0.691382	iclipFeatures
chr7_3297686_3300442_Myadm	4.34323	KO	111	0.758638	0.241362	0.706999	iclipFeatures
chr12_9028156_9028848_Wdr35	4.32974	KO	112	0.436347	0.563653	0.705074	iclipFeatures
chr17_57021048_57022692_Khsrp	4.32508	KO	113	0.761527	0.238473	0.705074	iclipFeatures
chr3_152273459_152276634_Miga1	4.31297	KO	114	0.756099	0.243901	0.677987	iclipFeatures
chr2_164016561_164018588_Ywhab	4.30373	KO	115	0.760794	0.239206	0.681698	iclipFeatures
chr1_80264922_80267155_Cul3	4.29346	KO	116	0.75109	0.24891	0.681987	iclipFeatures
chrX_152273074_152279099_Kdm5c	4.2871	KO	117	0.741546	0.258454	0.713849	iclipFeatures
chr10_4358477_4359472_Akap12	4.28107	KO	118	0.760794	0.239206	0.713776	iclipFeatures
chr17_6084582_6086517_Gtf2h5	4.22622	KO	119	0.489925	0.510075	0.714508	iclipFeatures
chr1_91375830_91376239_Ilkap	4.21929	KO	120	0.600222	0.399778	0.698161	iclipFeatures
chr10_79863277_79864771_Ptbp1	4.21646	KO	121	0.761527	0.238473	0.699132	iclipFeatures
chr10_34151390_34152215_Dse	4.21597	KO	122	0.754966	0.245034	0.672559	iclipFeatures
chr8_106668615_106670247_Cdh1	4.21298	KO	123	0.760794	0.239206	0.672559	iclipFeatures
chrX_52953905_52956961_Phf6	4.20335	KO	124	0.763426	0.236574	0.667202	iclipFeatures
chr11_69656696_69657202_Mpdu1	4.2001	KO	125	0.597324	0.402676	0.683308	iclipFeatures
chr1_135295212_135301917_Timm17a	4.18756	KO	126	0.760794	0.239206	0.64855	iclipFeatures
chr9_108572521_108572774_Dalrd3	4.18012	KO	127	0.475822	0.524178	0.629114	iclipFeatures
chr7_111067749_111072691_Eif4g2	4.17378	KO	128	0.760794	0.239206	0.621835	iclipFeatures
chr16_32084415_32084673_Pigx	4.15671	KO	129	0.436347	0.563653	0.603467	iclipFeatures
chr9_108204633_108207258_Dag1	4.15526	KO	130	0.761287	0.238713	0.619887	iclipFeatures
chr2_181357689_181359585_Arfrp1	4.15413	KO	131	0.41395	0.58605	0.602942	iclipFeatures
chr2_156123636_156124263_Nfs1	4.14515	KO	132	0.560607	0.439393	0.631439	iclipFeatures
chr18_35805362_35807172_Ube2d2a	4.12804	KO	133	0.687996	0.312004	0.630929	iclipFeatures
chr17_46257850_46258412_Tjap1	4.10838	KO	134	0.579749	0.420251	0.654787	iclipFeatures
chr16_57152736_57154531_Tomm70a	4.0952	KO	135	0.761527	0.238473	0.653603	iclipFeatures
chr9_21755441_21757285_Spc24	4.08725	KO	136	0.591339	0.408661	0.671885	iclipFeatures
chr11_88049269_88053757_Srsf1	4.08449	KO	137	0.760794	0.239206	0.691762	iclipFeatures
chr9_119238431_119241141_Oxsr1	4.06542	KO	138	0.755698	0.244302	0.698532	iclipFeatures
chr3_90498538_90499944_Chtop	4.058	KO	139	0.674919	0.325081	0.706324	iclipFeatures
chr9_83597236_83601346_Sh3bgrl2	4.03474	KO	140	0.749448	0.250552	0.705741	iclipFeatures
chr7_35547184_35548062_Nudt19	4.01802	KO	141	0.596771	0.403229	0.705894	iclipFeatures
chr11_6105690_6108244_Nudcd3	3.98056	KO	142	0.759376	0.240624	0.669417	iclipFeatures
chr14_21031441_21036743_Ap3m1	3.9739	KO	143	0.755698	0.244302	0.662651	iclipFeatures
chr4_149149984_149150643_Pgd	3.96358	KO	144	0.657668	0.342332	0.642119	iclipFeatures
chr12_31331561_31332176_Dld	3.95711	KO	145	0.755698	0.244302	0.643254	iclipFeatures
chr3_90391379_90392027_Ints3	3.95142	KO	146	0.59287	0.40713	0.659656	iclipFeatures
chr17_36954355_36954607_Znrd1	3.9504	KO	147	0.396023	0.603977	0.659798	iclipFeatures
chr12_104687741_104691688_Dicer1	3.94988	KO	148	0.688039	0.311961	0.625324	iclipFeatures
chr17_86997255_86997508_Pigf	3.93679	KO	149	0.469601	0.530399	0.635127	iclipFeatures
chr6_122727808_122729930_Slc2a3	3.9353	KO	150	0.760794	0.239206	0.625185	iclipFeatures
chr9_77982808_77984519_Elovl5	3.92585	KO	151	0.760794	0.239206	0.62297	iclipFeatures
chr3_104655722_104658462_Slc16a1	3.92063	KO	152	0.760794	0.239206	0.635294	iclipFeatures
chr14_103113410_103114119_Mycbp2	3.91126	KO	153	0.410956	0.589044	0.641983	iclipFeatures
chr2_144250120_144251181_Snx5	3.90611	KO	154	0.755698	0.244302	0.654986	iclipFeatures
chr5_144858958_144859778_Trrap	3.90592	KO	155	0.656284	0.343716	0.645064	iclipFeatures
chr1_74697699_74703730_Ttll4	3.90029	KO	156	0.570713	0.429287	0.644392	iclipFeatures
chr13_100655746_100656060_Taf9	3.89975	KO	157	0.519272	0.480728	0.615894	iclipFeatures
chr13_54458834_54460073_Thoc3	3.88672	KO	158	0.754925	0.245075	0.644427	iclipFeatures
chr11_23573250_23575480_0610010F05Rik	3.87575	KO	159	0.599626	0.400374	0.595065	iclipFeatures
chrX_151088908_151089686_Fgd1	3.87093	KO	160	0.66158	0.33842	0.605301	iclipFeatures
chr17_34985416_34985893_Lsm2	3.86978	KO	161	0.754076	0.245924	0.623637	iclipFeatures
chr3_136935225_136937727_Ppp3ca	3.85319	KO	162	0.475808	0.524192	0.638371	iclipFeatures
chr13_100655038_100656059_Ak6	3.85237	KO	163	0.696288	0.303712	0.638958	iclipFeatures
chr5_144264141_144264574_Bri3	3.85211	KO	164	0.26208	0.73792	0.655148	iclipFeatures
chr4_116601047_116601859_Nasp	3.83473	KO	165	0.758638	0.241362	0.63434	iclipFeatures
chr12_108202701_108203363_Ccnk	3.83294	KO	166	0.754076	0.245924	0.624778	iclipFeatures
chr5_138164582_138164848_Mcm7	3.83052	KO	167	0.666609	0.333391	0.639506	iclipFeatures
chr15_77078989_77084161_Rbfox2	3.82914	KO	168	0.760794	0.239206	0.646006	iclipFeatures
chr4_106586765_106589113_Dhcr24	3.82535	KO	169	0.761527	0.238473	0.664087	iclipFeatures
chr7_28305515_28306075_Timm50	3.82106	KO	170	0.453507	0.546493	0.664087	iclipFeatures
chr2_70690983_70691743_Gorasp2	3.80874	KO	171	0.658455	0.341545	0.663987	iclipFeatures
chr7_55931265_55932915_Nipa2	3.80743	KO	172	0.623085	0.376915	0.661767	iclipFeatures
chr11_70977835_70978100_C1qbp	3.79647	KO	173	0.761287	0.238713	0.661096	iclipFeatures
chr16_4765996_4766742_Hmox2	3.79482	KO	174	0.442892	0.557108	0.66062	iclipFeatures
chr18_35590430_35593835_Matr3	3.79131	KO	175	0.758638	0.241362	0.689899	iclipFeatures
chr16_31871781_31873356_Dlg1	3.78968	KO	176	0.753076	0.246924	0.680657	iclipFeatures
chr1_89888894_89897617_Agap1	3.78873	KO	177	0.644415	0.355585	0.694052	iclipFeatures
chr1_106769429_106772446_Vps4b	3.78561	KO	178	0.754076	0.245924	0.673923	iclipFeatures
chr7_105803205_105810341_Mrpl17	3.78512	KO	179	0.756773	0.243227	0.699448	iclipFeatures
chr2_69871194_69871463_Mettl5	3.77684	KO	180	0.74629	0.25371	0.698892	iclipFeatures
chr8_123897122_123899548_Nup133	3.77376	KO	181	0.566042	0.433958	0.693328	iclipFeatures
chr14_70654245_70666000_Xpo7	3.76864	KO	182	0.75703	0.24297	0.679166	iclipFeatures
chr16_15550985_15556396_Ube2v2	3.76806	KO	183	0.560001	0.439999	0.672811	iclipFeatures
chr4_75277352_75277734_Tmem261	3.76535	KO	184	0.698138	0.301862	0.657997	iclipFeatures
chr5_108500404_108506976_Pcgf3	3.76474	KO	185	0.753076	0.246924	0.659638	iclipFeatures
chr6_39334770_39337191_Slc37a3	3.7573	KO	186	0.697436	0.302564	0.678971	iclipFeatures
chr2_25199711_25200319_Nelfb	3.74709	KO	187	0.502802	0.497198	0.679323	iclipFeatures
chr7_46822909_46823800_Gtf2h1	3.7288	KO	188	0.690527	0.309473	0.689263	iclipFeatures
chr8_72565187_72567792_Smim7	3.72263	KO	189	0.608629	0.391371	0.695528	iclipFeatures
chr11_93943687_93946985_Mbtd1	3.72152	KO	190	0.762697	0.237303	0.6963	iclipFeatures
chr2_113831491_113834754_Arhgap11a	3.70217	KO	191	0.759376	0.240624	0.670846	iclipFeatures
chr2_29180125_29182473_Setx	3.69516	KO	192	0.760554	0.239446	0.658201	iclipFeatures
chr17_14944993_14945244_Phf10	3.695	KO	193	0.659394	0.340606	0.617995	iclipFeatures
chr8_46206796_46207590_Slc25a4	3.69372	KO	194	0.760794	0.239206	0.583138	iclipFeatures
chr2_32230650_32234537_Prrc2b	3.69171	KO	195	0.760794	0.239206	0.56526	iclipFeatures
chr5_76154782_76155503_Srd5a3	3.68857	KO	196	0.442892	0.557108	0.553304	iclipFeatures
chr2_167607849_167609100_Gm20431	3.68746	KO	197	0.376354	0.623646	0.530162	iclipFeatures
chr4_59753039_59761439_E130308A19Rik	3.67301	KO	198	0.288472	0.711528	0.507858	iclipFeatures
chr9_65186779_65187029_Igdcc3	3.67075	KO	199	0.260057	0.739943	0.498439	iclipFeatures
chr16_18969556_18970309_Hira	3.67008	KO	200	0.583914	0.416086	0.488437	iclipFeatures
chr4_139489231_139489588_Ubr4	3.66534	KO	201	0.639811	0.360189	0.519851	iclipFeatures
chr4_46502424_46503632_Nans	3.64966	KO	202	0.529143	0.470857	0.547844	iclipFeatures
chr6_13867734_13870531_2610001J05Rik	3.6399	KO	203	0.436347	0.563653	0.581646	iclipFeatures
chrX_101079208_101079461_Slc7a3	3.6326	KO	204	0.666609	0.333391	0.621407	iclipFeatures
chr1_136034220_136035342_Tmem9	3.63163	KO	205	0.660773	0.339227	0.63796	iclipFeatures
chr8_13884787_13885040_Coprs	3.61709	KO	206	0.75703	0.24297	0.600265	iclipFeatures
chr12_105040450_105040911_Glrx5	3.61678	KO	207	0.656284	0.343716	0.613208	iclipFeatures
chr19_21597311_21598189_1110059E24Rik	3.61614	KO	208	0.626488	0.373512	0.634589	iclipFeatures
chr12_36014554_36015806_Tspan13	3.61137	KO	209	0.657668	0.342332	0.644007	iclipFeatures
chr17_29250802_29251504_Ppil1	3.61105	KO	210	0.749448	0.250552	0.646626	iclipFeatures
chr4_136049730_136050197_Rpl11	3.60673	KO	211	0.26286	0.73714	0.646492	iclipFeatures
chr13_90103322_90114921_Tmem167	3.60144	KO	212	0.658575	0.341425	0.641727	iclipFeatures
chr11_17266695_17269176_C1d	3.59895	KO	213	0.650155	0.349845	0.623382	iclipFeatures
chr13_119706478_119708260_Hmgcs1	3.58746	KO	214	0.760794	0.239206	0.588588	iclipFeatures
chr11_21319858_21321136_Vps54	3.58716	KO	215	0.686953	0.313047	0.541717	iclipFeatures
chr2_26395475_26397123_Pmpca	3.57405	KO	216	0.755698	0.244302	0.557437	iclipFeatures
chr14_32080516_32083180_Dph3	3.5709	KO	217	0.608629	0.391371	0.567659	iclipFeatures
chr13_33985389_33988465_Nqo2	3.57037	KO	218	0.443036	0.556964	0.557276	iclipFeatures
chr1_135434579_135441683_Nav1	3.56932	KO	219	0.309737	0.690263	0.550348	iclipFeatures
chr19_18704121_18704792_Carnmt1	3.56627	KO	220	0.280739	0.719261	0.53105	iclipFeatures
chr1_183326235_183327339_Mia3	3.56567	KO	221	0.420059	0.579941	0.493116	iclipFeatures
chr11_40739242_40740046_Nudcd2	3.56552	KO	222	0.760794	0.239206	0.501161	iclipFeatures
chr2_91932820_91933408_Dgkz	3.55827	KO	223	0.546321	0.453679	0.489858	iclipFeatures
chrX_53243414_53246145_Fam122b	3.55546	KO	224	0.691512	0.308488	0.533325	iclipFeatures
chr1_131053699_131055091_Mapkapk2	3.55512	KO	225	0.493976	0.506024	0.531335	iclipFeatures
chr2_167607637_167609100_Ube2v1	3.54318	KO	226	0.376354	0.623646	0.540679	iclipFeatures
chr15_81475012_81476369_Rbx1	3.54289	KO	227	0.68908	0.31092	0.501694	iclipFeatures
chr9_15311549_15312105_Taf1d	3.5372	KO	228	0.330006	0.669994	0.512828	iclipFeatures
chr16_10959272_10960942_Litaf	3.53375	KO	229	0.744413	0.255587	0.502811	iclipFeatures
chr8_85636587_85640535_Neto2	3.5308	KO	230	0.260833	0.739167	0.514488	iclipFeatures
chr17_35149075_35149467_Prrc2a	3.52997	KO	231	0.513498	0.486502	0.542621	iclipFeatures
chr4_123000515_123002485_Mycl	3.52937	KO	232	0.370943	0.629057	0.543257	iclipFeatures
chr3_53853375_53857927_Ufm1	3.52484	KO	233	0.657668	0.342332	0.5795	iclipFeatures
chr14_65039449_65039836_Ints9	3.51877	KO	234	0.591339	0.408661	0.574602	iclipFeatures
chr17_46735704_46736899_Cnpy3	3.51134	KO	235	0.610745	0.389255	0.621043	iclipFeatures
chr8_34090420_34090842_Dctn6	3.50952	KO	236	0.657686	0.342314	0.614287	iclipFeatures
chr10_91160416_91161841_Tmpo	3.50767	KO	237	0.695435	0.304565	0.616593	iclipFeatures
chrX_7882517_7883432_Pim2	3.50644	KO	238	0.692438	0.307562	0.595901	iclipFeatures
chr12_69182730_69182990_Rpl36al	3.50605	KO	239	0.695435	0.304565	0.610825	iclipFeatures
chr10_62973319_62974188_Dna2	3.49867	KO	240	0.725244	0.274756	0.61531	iclipFeatures
chr8_84699539_84699808_Trmt1	3.48691	KO	241	0.445935	0.554065	0.625621	iclipFeatures
chr14_51905270_51906139_Ndrg2	3.48522	KO	242	0.394001	0.605999	0.582083	iclipFeatures
chr10_88746606_88746903_Utp20	3.48123	KO	243	0.450752	0.549248	0.557129	iclipFeatures
chr7_30945247_30946579_Usf2	3.47974	KO	244	0.740576	0.259424	0.563288	iclipFeatures
chr3_138555504_138559696_Eif4e	3.46537	KO	245	0.655601	0.344399	0.559755	iclipFeatures
chr11_61151780_61154470_Usp22	3.46296	KO	246	0.760794	0.239206	0.541168	iclipFeatures
chr10_20141580_20142753_Map3k5	3.46225	KO	247	0.260057	0.739943	0.567534	iclipFeatures
chr19_4131444_4132307_Tmem134	3.45228	KO	248	0.442892	0.557108	0.548465	iclipFeatures
chr9_95456893_95461404_U2surp	3.4484	KO	249	0.75703	0.24297	0.549736	iclipFeatures
chr13_94201309_94203998_Scamp1	3.44317	KO	250	0.689917	0.310083	0.52127	iclipFeatures
chrX_74272885_74273137_Rpl10	3.44284	KO	251	0.260057	0.739943	0.521055	iclipFeatures
chr7_101911365_101911903_Lamtor1	3.42867	KO	252	0.657668	0.342332	0.521055	iclipFeatures
chr5_30950852_30955683_Preb	3.42672	KO	253	0.260057	0.739943	0.505456	iclipFeatures
chr7_59982494_59983239_Snrpn	3.42536	KO	254	0.753291	0.246709	0.505617	iclipFeatures
chr12_100125449_100125702_Nrde2	3.41254	KO	255	0.370943	0.629057	0.512489	iclipFeatures
chr16_87483324_87484114_Cct8	3.40941	KO	256	0.758638	0.241362	0.549207	iclipFeatures
chr11_80360491_80363948_5730455P16Rik	3.40551	KO	257	0.260057	0.739943	0.552877	iclipFeatures
chr2_151715811_151718633_Psmf1	3.40225	KO	258	0.286902	0.713098	0.5966	iclipFeatures
chr18_40204864_40206237_Yipf5	3.39768	KO	259	0.758638	0.241362	0.591825	iclipFeatures
chr4_40964645_40965303_Chmp5	3.393	KO	260	0.758638	0.241362	0.630595	iclipFeatures
chr2_84686934_84688216_Med19	3.3847	KO	261	0.627241	0.372759	0.630595	iclipFeatures
chr3_95628711_95632117_Ensa	3.3845	KO	262	0.694364	0.305636	0.674025	iclipFeatures
chr12_91806036_91809843_Sel1l	3.38009	KO	263	0.697288	0.302712	0.697605	iclipFeatures
chr5_144556394_144557480_Nptx2	3.3773	KO	264	0.705543	0.294457	0.697311	iclipFeatures
chr1_162670724_162673606_Prrc2c	3.37711	KO	265	0.758638	0.241362	0.697526	iclipFeatures
chr14_26918987_26923799_Appl1	3.36892	KO	266	0.758638	0.241362	0.710882	iclipFeatures
chr14_32296320_32297550_Parg	3.36708	KO	267	0.694364	0.305636	0.711174	iclipFeatures
chr4_130530127_130531904_Nkain1	3.36493	KO	268	0.522696	0.477304	0.713444	iclipFeatures
chr11_53259813_53261824_Hspa4	3.36411	KO	269	0.755698	0.244302	0.707331	iclipFeatures
chr8_128732022_128733579_Itgb1	3.35887	KO	270	0.760794	0.239206	0.693726	iclipFeatures
chr6_87842614_87844038_Cnbp	3.35832	KO	271	0.760794	0.239206	0.666515	iclipFeatures
chr15_89371332_89372850_Ncaph2	3.354	KO	272	0.697288	0.302712	0.673421	iclipFeatures
chr14_31700013_31702019_Ankrd28	3.35116	KO	273	0.719985	0.280015	0.68545	iclipFeatures
chr4_107048053_107049694_Ssbp3	3.34683	KO	274	0.644415	0.355585	0.657055	iclipFeatures
chr7_116104427_116105210_1110004F10Rik	3.34622	KO	275	0.622589	0.377411	0.639059	iclipFeatures
chr7_110813525_110816784_Rnf141	3.34526	KO	276	0.486529	0.513471	0.637223	iclipFeatures
chr9_120959517_120960509_Ctnnb1	3.34514	KO	277	0.763426	0.236574	0.616233	iclipFeatures
chr2_156873084_156873563_1110008F13Rik	3.34487	KO	278	0.642984	0.357016	0.570241	iclipFeatures
chr7_127027728_127027981_Kif22	3.33806	KO	279	0.471744	0.528256	0.531805	iclipFeatures
chr11_95391402_95391776_Slc35b1	3.3377	KO	280	0.580834	0.419166	0.498615	iclipFeatures
chr18_68321355_68324852_Rnmt	3.33479	KO	281	0.742432	0.257568	0.524812	iclipFeatures
chr8_110881865_110882234_Cog4	3.3326	KO	282	0.487397	0.512603	0.518013	iclipFeatures
chr8_123097434_123097760_Spg7	3.33025	KO	283	0.260057	0.739943	0.529579	iclipFeatures
chr13_65177109_65177663_Nlrp4f	3.32963	KO	284	0.260057	0.739943	0.551948	iclipFeatures
chr10_75896768_75897048_Smarcb1	3.32777	KO	285	0.290694	0.709306	0.569944	iclipFeatures
chr2_164151831_164155524_Stk4	3.32567	KO	286	0.748498	0.251502	0.540571	iclipFeatures
chr8_124838487_124839833_2810004N23Rik	3.32159	KO	287	0.695435	0.304565	0.553821	iclipFeatures
chr11_5069686_5070147_Ewsr1	3.31996	KO	288	0.758638	0.241362	0.585459	iclipFeatures
chr8_119347994_119348929_Hsbp1	3.31846	KO	289	0.695435	0.304565	0.63396	iclipFeatures
chr10_41528841_41531048_Cd164	3.31523	KO	290	0.760794	0.239206	0.681043	iclipFeatures
chr6_30211288_30214958_Ube2h	3.31041	KO	291	0.448706	0.551294	0.632199	iclipFeatures
chr8_33619194_33619804_Ppp2cb	3.30674	KO	292	0.619899	0.380101	0.638443	iclipFeatures
chr11_121327202_121328357_Wdr45b	3.30496	KO	293	0.576432	0.423568	0.608012	iclipFeatures
chr7_16839910_16840931_Strn4	3.30456	KO	294	0.745065	0.254935	0.564474	iclipFeatures
chr5_93181931_93182976_Ccni	3.29978	KO	295	0.761527	0.238473	0.562561	iclipFeatures
chr2_165288030_165290360_Elmo2	3.29901	KO	296	0.260057	0.739943	0.543696	iclipFeatures
chr7_59982500_59983362_Snurf	3.29577	KO	297	0.757871	0.242129	0.557762	iclipFeatures
chrX_139671868_139673145_Rnf128	3.29365	KO	298	0.454337	0.545663	0.576198	iclipFeatures
chr11_78541223_78541737_Ift20	3.29179	KO	299	0.260057	0.739943	0.551603	iclipFeatures
chr4_155957365_155959604_Ube2j2	3.29019	KO	300	0.74166	0.25834	0.531747	iclipFeatures
chr7_127893060_127893312_Vkorc1	3.28961	KO	301	0.260057	0.739943	0.543471	iclipFeatures
chr5_107744794_107748145_Evi5	3.28559	KO	302	0.760554	0.239446	0.542114	iclipFeatures
chr10_37133242_37136107_Marcks	3.27916	KO	303	0.760794	0.239206	0.572544	iclipFeatures
chr19_40221172_40222584_Pdlim1	3.27836	KO	304	0.499117	0.500883	0.572544	iclipFeatures
chr8_125032874_125034194_Tsnax	3.2652	KO	305	0.562967	0.437033	0.574242	iclipFeatures
chr16_87366288_87368754_N6amt1	3.26506	KO	306	0.3773	0.6227	0.618186	iclipFeatures
chr5_24802822_24803663_Rheb	3.26222	KO	307	0.744299	0.255701	0.579319	iclipFeatures
chr18_9993614_9996096_Usp14	3.2606	KO	308	0.758638	0.241362	0.566849	iclipFeatures
chr4_89274470_89274774_Cdkn2a	3.26035	KO	309	0.260057	0.739943	0.585818	iclipFeatures
chr11_8993136_8996849_Hus1	3.25233	KO	310	0.758638	0.241362	0.575706	iclipFeatures
chr4_62388039_62391769_Slc31a1	3.24703	KO	311	0.699498	0.300502	0.613839	iclipFeatures
chr2_13651020_13656821_St8sia6	3.24482	KO	312	0.371884	0.628116	0.615562	iclipFeatures
chr15_38691475_38692446_Atp6v1c1	3.24432	KO	313	0.636095	0.363905	0.615667	iclipFeatures
chr11_57482989_57484017_Fam114a2	3.23776	KO	314	0.688803	0.311197	0.63937	iclipFeatures
chr4_139648270_139649691_Aldh4a1	3.23536	KO	315	0.461844	0.538156	0.639183	iclipFeatures
chr15_81704247_81705188_Rangap1	3.23133	KO	316	0.758638	0.241362	0.638037	iclipFeatures
chr3_135465194_135468198_Ube2d3	3.22849	KO	317	0.761527	0.238473	0.666591	iclipFeatures
chr13_19357675_19358129_Stard3nl	3.22726	KO	318	0.75969	0.24031	0.678123	iclipFeatures
chr7_109893779_109894631_Dennd5a	3.22238	KO	319	0.497081	0.502919	0.685322	iclipFeatures
chr11_109667544_109669663_Prkar1a	3.22069	KO	320	0.756773	0.243227	0.689243	iclipFeatures
chr13_92384803_92389053_Dhfr	3.21559	KO	321	0.688039	0.311961	0.689458	iclipFeatures
chr1_187348577_187351704_Gpatch2	3.20969	KO	322	0.657423	0.342577	0.680275	iclipFeatures
chr9_113975383_113977201_Ubp1	3.20821	KO	323	0.751412	0.248588	0.648609	iclipFeatures
chr10_112925427_112928428_Atxn7l3b	3.2063	KO	324	0.760794	0.239206	0.674981	iclipFeatures
chr10_128488972_128490174_Smarcc2	3.20512	KO	325	0.501052	0.498948	0.675383	iclipFeatures
chr2_71855853_71858427_Itga6	3.20323	KO	326	0.760794	0.239206	0.63534	iclipFeatures
chr14_40906426_40908057_Tspan14	3.20028	KO	327	0.669689	0.330311	0.639034	iclipFeatures
chr8_71251121_71251393_Haus8	3.19854	KO	328	0.443036	0.556964	0.637455	iclipFeatures
chr19_10194922_10196872_Fads1	3.19709	KO	329	0.760794	0.239206	0.600776	iclipFeatures
chr7_118118889_118120291_Arl6ip1	3.1941	KO	330	0.760794	0.239206	0.587765	iclipFeatures
chr7_132827456_132827813_Mettl10	3.18963	KO	331	0.287607	0.712393	0.587549	iclipFeatures
chr9_50879855_50881622_Ppp2r1b	3.1893	KO	332	0.694364	0.305636	0.586461	iclipFeatures
chr6_106778244_106780929_Crbn	3.18384	KO	333	0.735627	0.264373	0.57002	iclipFeatures
chr5_134597959_134601805_Rfc2	3.18294	KO	334	0.394001	0.605999	0.531035	iclipFeatures
chr10_20280006_20281590_Map7	3.18169	KO	335	0.370943	0.629057	0.510597	iclipFeatures
chr4_107414088_107416346_Ndc1	3.18157	KO	336	0.758638	0.241362	0.551566	iclipFeatures
chr4_149176318_149180767_Kif1b	3.17198	KO	337	0.658805	0.341195	0.547872	iclipFeatures
chr17_31531075_31531326_Ndufv3	3.17115	KO	338	0.278626	0.721374	0.548739	iclipFeatures
chr7_24515419_24515682_Zfp428	3.17085	KO	339	0.370943	0.629057	0.58417	iclipFeatures
chr3_32726602_32726973_Actl6a	3.17046	KO	340	0.55642	0.44358	0.586572	iclipFeatures
chr11_59407133_59407663_Snap47	3.16962	KO	341	0.697288	0.302712	0.562003	iclipFeatures
chr5_72976063_72978841_Slain2	3.16882	KO	342	0.657423	0.342577	0.572202	iclipFeatures
chr10_119198811_119202980_Cand1	3.15795	KO	343	0.744299	0.255701	0.60057	iclipFeatures
chr4_126164081_126165395_Thrap3	3.15479	KO	344	0.748315	0.251685	0.639555	iclipFeatures
chr2_121460234_121462121_Mfap1b	3.15256	KO	345	0.394964	0.605036	0.609919	iclipFeatures
chr12_108106430_108107349_Setd3	3.15248	KO	346	0.512945	0.487055	0.584394	iclipFeatures
chr15_79527695_79530213_Ddx17	3.15203	KO	347	0.760794	0.239206	0.555746	iclipFeatures
chr4_45105206_45105629_Tomm5	3.15193	KO	348	0.562309	0.437691	0.557396	iclipFeatures
chr5_113842433_113844348_Coro1c	3.15044	KO	349	0.760794	0.239206	0.544125	iclipFeatures
chr16_20532315_20534013_Dvl3	3.14971	KO	350	0.260057	0.739943	0.574065	iclipFeatures
chr11_4928610_4928867_Thoc5	3.14772	KO	351	0.442042	0.557958	0.562171	iclipFeatures
chr5_124117943_124118196_Arl6ip4	3.14571	KO	352	0.370943	0.629057	0.545824	iclipFeatures
chr9_88447008_88454253_Syncrip	3.14476	KO	353	0.760794	0.239206	0.565672	iclipFeatures
chr2_119136997_119137701_Rmdn3	3.14299	KO	354	0.615613	0.384387	0.526781	iclipFeatures
chr6_71978515_71982475_Polr1a	3.14252	KO	355	0.694364	0.305636	0.526781	iclipFeatures
chr10_128510247_128510619_Esyt1	3.13873	KO	356	0.394001	0.605999	0.558657	iclipFeatures
chr6_87936326_87936629_Hmces	3.1355	KO	357	0.597324	0.402676	0.597426	iclipFeatures
chr10_117814464_117815780_Rap1b	3.13431	KO	358	0.760794	0.239206	0.564204	iclipFeatures
chr7_100469461_100470159_C2cd3	3.13407	KO	359	0.371884	0.628116	0.528649	iclipFeatures
chrX_77760974_77761227_Prkx	3.13374	KO	360	0.260057	0.739943	0.523294	iclipFeatures
chr6_88503578_88505106_Sec61a1	3.1303	KO	361	0.760794	0.239206	0.527529	iclipFeatures
chr18_73639008_73640257_Smad4	3.12996	KO	362	0.758638	0.241362	0.512872	iclipFeatures
chr17_24215053_24215858_1600002H07Rik	3.1253	KO	363	0.428575	0.571425	0.510516	iclipFeatures
chr9_21957270_21958270_Swsap1	3.12185	KO	364	0.260057	0.739943	0.534079	iclipFeatures
chr9_107592555_107593038_Ifrd2	3.12022	KO	365	0.64082	0.35918	0.584152	iclipFeatures
chr9_69432169_69433122_Ice2	3.11939	KO	366	0.436347	0.563653	0.582336	iclipFeatures
chr13_98723405_98725776_Fcho2	3.11469	KO	367	0.450752	0.549248	0.582336	iclipFeatures
chr3_95322789_95323599_Cers2	3.11436	KO	368	0.737233	0.262767	0.565484	iclipFeatures
chr10_61431786_61432040_Eif4ebp2	3.11155	KO	369	0.607514	0.392486	0.615237	iclipFeatures
chr11_87979524_87981519_Dynll2	3.10587	KO	370	0.760794	0.239206	0.59479	iclipFeatures
chr7_125640953_125641505_Gtf3c1	3.10462	KO	371	0.742628	0.257372	0.620045	iclipFeatures
chr6_17665435_17666972_Capza2	3.0984	KO	372	0.758638	0.241362	0.646602	iclipFeatures
chr7_105731729_105733023_Rrp8	3.09626	KO	373	0.260057	0.739943	0.598885	iclipFeatures
chr11_45909287_45910625_Clint1	3.09209	KO	374	0.757587	0.242413	0.607677	iclipFeatures
chr10_81123622_81124697_Map2k2	3.0873	KO	375	0.436347	0.563653	0.607833	iclipFeatures
chr13_114154856_114157461_Arl15	3.08395	KO	376	0.688904	0.311096	0.60965	iclipFeatures
chr16_27446251_27452218_Ccdc50	3.08021	KO	377	0.716321	0.283679	0.585892	iclipFeatures
chr13_35978796_35979838_Lyrm4	3.07774	KO	378	0.260057	0.739943	0.612307	iclipFeatures
chr8_95346631_95347513_Usb1	3.07386	KO	379	0.695435	0.304565	0.588896	iclipFeatures
chr11_116849896_116850961_Srsf2	3.07374	KO	380	0.762358	0.237642	0.573661	iclipFeatures
chr19_32672559_32674243_Atad1	3.07246	KO	381	0.760794	0.239206	0.58085	iclipFeatures
chr10_127498709_127499384_R3hdm2	3.07184	KO	382	0.521062	0.478938	0.583372	iclipFeatures
chr3_95006701_95007474_Zfp687	3.06759	KO	383	0.524202	0.475798	0.618783	iclipFeatures
chr9_50605239_50607431_AU019823	3.06706	KO	384	0.523482	0.476518	0.625103	iclipFeatures
chr4_43566927_43567188_Gba2	3.06155	KO	385	0.283996	0.716004	0.624011	iclipFeatures
chr13_58176155_58177875_Ubqln1	3.05816	KO	386	0.760794	0.239206	0.621776	iclipFeatures
chr14_20499363_20501483_Ppp3cb	3.05804	KO	387	0.741546	0.258454	0.613874	iclipFeatures
chr4_124918464_124918985_Cdca8	3.05671	KO	388	0.614159	0.385841	0.637392	iclipFeatures
chr4_59220393_59222833_Ugcg	3.05541	KO	389	0.758638	0.241362	0.661123	iclipFeatures
chr9_113918081_113919697_Clasp2	3.05301	KO	390	0.751442	0.248558	0.707867	iclipFeatures
chr11_86583864_86585307_Vmp1	3.05038	KO	391	0.738441	0.261559	0.701517	iclipFeatures
chr7_135689781_135690088_Mki67	3.04609	KO	392	0.442042	0.557958	0.668482	iclipFeatures
chrX_42104984_42109664_Xiap	3.0426	KO	393	0.759376	0.240624	0.64416	iclipFeatures
chr10_82896045_82897725_Txnrd1	3.03825	KO	394	0.760794	0.239206	0.64416	iclipFeatures
chr9_58651318_58655208_Nptn	3.03461	KO	395	0.751442	0.248558	0.64432	iclipFeatures
chr4_109385329_109387817_Eps15	3.03456	KO	396	0.697288	0.302712	0.639384	iclipFeatures
chr1_190945091_190946962_Angel2	3.03443	KO	397	0.411194	0.588806	0.669238	iclipFeatures
chr5_129718004_129722556_Mrps17	3.03245	KO	398	0.370943	0.629057	0.658677	iclipFeatures
chr14_52073375_52075079_Hnrnpc	3.032	KO	399	0.758638	0.241362	0.648939	iclipFeatures
chr9_70778094_70780229_Adam10	3.0304	KO	400	0.753046	0.246954	0.649015	iclipFeatures
chr1_181087137_181093916_Nvl	3.02989	KO	401	0.68908	0.31092	0.655149	iclipFeatures
chr10_79688059_79688402_Cdc34	3.02977	KO	402	0.740576	0.259424	0.689894	iclipFeatures
chr2_39015120_39015877_Arpc5l	3.02956	KO	403	0.653771	0.346229	0.728663	iclipFeatures
chr15_25363274_25364228_Basp1	3.02689	KO	404	0.663414	0.336586	0.728952	iclipFeatures
chr5_33372362_33373296_Maea	3.0232	KO	405	0.752194	0.247806	0.679731	iclipFeatures
chr18_10811967_10818704_Mib1	3.02172	KO	406	0.758638	0.241362	0.686305	iclipFeatures
chr17_28398752_28401046_Fkbp5	3.01857	KO	407	0.758638	0.241362	0.655882	iclipFeatures
chr4_134243288_134244902_Zfp593	3.01748	KO	408	0.758638	0.241362	0.666585	iclipFeatures
chr19_32820028_32826160_Pten	3.01611	KO	409	0.761527	0.238473	0.626249	iclipFeatures
chr9_22158082_22158358_Pigyl	3.01597	KO	410	0.260833	0.739167	0.577035	iclipFeatures
chr6_52766074_52766780_Tax1bp1	3.00758	KO	411	0.754823	0.245177	0.577251	iclipFeatures
chr18_46282150_46283255_Ccdc112	3.00724	KO	412	0.436347	0.563653	0.563587	iclipFeatures
chr2_57367423_57370720_Gpd2	3.00703	KO	413	0.760794	0.239206	0.562154	iclipFeatures
chr18_36671159_36671438_Sra1	3.00695	KO	414	0.260057	0.739943	0.525603	iclipFeatures
chr18_36671154_36671438_Apbb3	3.0019	KO	415	0.260057	0.739943	0.575384	iclipFeatures
chr17_65580052_65580688_Vapa	3.00057	KO	416	0.760794	0.239206	0.543536	iclipFeatures
chr9_36708481_36710334_Chek1	2.99961	KO	417	0.622006	0.377994	0.575839	iclipFeatures
chr5_121130532_121134146_Ptpn11	2.99879	KO	418	0.744299	0.255701	0.525765	iclipFeatures
chr1_37983866_37990198_Txndc9	2.99873	KO	419	0.396023	0.603977	0.575912	iclipFeatures
chr9_59388257_59393293_Arih1	2.99764	KO	420	0.758638	0.241362	0.624851	iclipFeatures
chrX_56376029_56378470_Smim10l2a	2.99429	KO	421	0.436347	0.563653	0.61542	iclipFeatures
chr15_34283380_34284303_Laptm4b	2.99377	KO	422	0.759376	0.240624	0.579427	iclipFeatures
chr3_41756059_41758941_D3Ertd751e	2.99075	KO	423	0.260057	0.739943	0.557317	iclipFeatures
chr1_182275769_182276746_Degs1	2.98343	KO	424	0.761527	0.238473	0.59206	iclipFeatures
chr6_39603236_39610381_Braf	2.9834	KO	425	0.749448	0.250552	0.559519	iclipFeatures
chr2_174465090_174465813_Prelid3b	2.98285	KO	426	0.666476	0.333524	0.571219	iclipFeatures
chr1_155778154_155779168_Qsox1	2.98098	KO	427	0.26208	0.73792	0.571145	iclipFeatures
chr12_4827008_4827659_Sf3b6	2.97637	KO	428	0.523196	0.476804	0.621292	iclipFeatures
chr5_92441310_92444290_Scarb2	2.97333	KO	429	0.743457	0.256543	0.600758	iclipFeatures
chr18_63987359_63989761_Wdr7	2.96734	KO	430	0.433222	0.566778	0.583223	iclipFeatures
chr1_85907638_85908698_Itm2c	2.96395	KO	431	0.553351	0.446649	0.592655	iclipFeatures
chr3_94497541_94502056_Snx27	2.95964	KO	432	0.758638	0.241362	0.59253	iclipFeatures
chr12_102775606_102777706_Ubr7	2.95565	KO	433	0.761527	0.238473	0.61629	iclipFeatures
chr3_51515317_51521306_Setd7	2.95472	KO	434	0.556188	0.443812	0.601676	iclipFeatures
chr5_140620576_140623531_Ttyh3	2.95288	KO	435	0.574095	0.425905	0.634218	iclipFeatures
chr19_41210841_41215071_Tm9sf3	2.95129	KO	436	0.760794	0.239206	0.655046	iclipFeatures
chr4_107896727_107899384_0610037L13Rik	2.95036	KO	437	0.260833	0.739167	0.605188	iclipFeatures
chr17_71344488_71345337_Smchd1	2.94557	KO	438	0.760794	0.239206	0.605114	iclipFeatures
chr18_84981142_84981472_Fbxo15	2.94445	KO	439	0.597324	0.402676	0.624103	iclipFeatures
chr8_123400706_123404174_Tcf25	2.94338	KO	440	0.758638	0.241362	0.641044	iclipFeatures
chr17_10206470_10209614_Qk	2.94287	KO	441	0.761627	0.238373	0.630822	iclipFeatures
chr12_72211748_72212534_Rtn1	2.94214	KO	442	0.260057	0.739943	0.680603	iclipFeatures
chr11_80032190_80034123_Suz12	2.94112	KO	443	0.760794	0.239206	0.669751	iclipFeatures
chr7_126491707_126492668_Atxn2l	2.93997	KO	444	0.746077	0.253923	0.675785	iclipFeatures
chr5_23503263_23507535_Srpk2	2.93838	KO	445	0.743503	0.256497	0.67503	iclipFeatures
chr1_38051713_38055579_Eif5b	2.93711	KO	446	0.658575	0.341425	0.674947	iclipFeatures
chr8_25815995_25817574_Ash2l	2.93621	KO	447	0.758638	0.241362	0.696246	iclipFeatures
chr13_6579767_6581459_Pfkp	2.93447	KO	448	0.652274	0.347726	0.694597	iclipFeatures
chr12_85815447_85816113_0610007P14Rik	2.92963	KO	449	0.657668	0.342332	0.659486	iclipFeatures
chr14_121286338_121287327_Stk24	2.92787	KO	450	0.75109	0.24891	0.661215	iclipFeatures
chr9_103353093_103356013_Cdv3	2.92259	KO	451	0.760794	0.239206	0.671221	iclipFeatures
chr11_76257197_76258564_Nxn	2.92253	KO	452	0.47305	0.52695	0.671221	iclipFeatures
chr1_40024697_40026310_Map4k4	2.92182	KO	453	0.744299	0.255701	0.682073	iclipFeatures
chr17_45698231_45698495_Mrpl14	2.92094	KO	454	0.394964	0.605036	0.690736	iclipFeatures
chr10_58421455_58424691_Lims1	2.92011	KO	455	0.760794	0.239206	0.685441	iclipFeatures
chr3_122538718_122542104_Fnbp1l	2.91948	KO	456	0.758638	0.241362	0.685225	iclipFeatures
chr4_123349626_123350888_Macf1	2.91456	KO	457	0.758638	0.241362	0.682946	iclipFeatures
chr11_95764059_95772353_Zfp652	2.91375	KO	458	0.760794	0.239206	0.656498	iclipFeatures
chr11_120488434_120489065_Mrpl12	2.91228	KO	459	0.744299	0.255701	0.693081	iclipFeatures
chr2_157556361_157557889_Blcap	2.91187	KO	460	0.698138	0.301862	0.692865	iclipFeatures
chr1_170193419_170200002_Uhmk1	2.91062	KO	461	0.758638	0.241362	0.643007	iclipFeatures
chr5_130135207_130135733_Tpst1	2.90646	KO	462	0.450257	0.549743	0.642088	iclipFeatures
chr2_90432888_90436409_Ptprj	2.90223	KO	463	0.479819	0.520181	0.641873	iclipFeatures
chr8_111154420_111157893_Glg1	2.90167	KO	464	0.760794	0.239206	0.633162	iclipFeatures
chr12_65061480_65063386_Prpf39	2.90086	KO	465	0.758638	0.241362	0.639428	iclipFeatures
chr6_131284387_131284638_Magohb	2.89791	KO	466	0.260057	0.739943	0.639726	iclipFeatures
chr2_34804363_34805710_Fbxw2	2.89687	KO	467	0.749448	0.250552	0.653835	iclipFeatures
chr6_100866576_100869934_Ppp4r2	2.89595	KO	468	0.758638	0.241362	0.664987	iclipFeatures
chr5_33027195_33027967_Ywhah	2.89191	KO	469	0.657193	0.342807	0.614913	iclipFeatures
chr16_44159640_44163462_Naa50	2.89129	KO	470	0.760794	0.239206	0.615128	iclipFeatures
chr1_181896383_181905859_Enah	2.89023	KO	471	0.761627	0.238373	0.665275	iclipFeatures
chr5_134148053_134148928_Wbscr16	2.89019	KO	472	0.591339	0.408661	0.656876	iclipFeatures
chr5_134148057_134148928_Rcc1l	2.89019	KO	473	0.591339	0.408661	0.656815	iclipFeatures
chr1_24010757_24012291_Fam135a	2.88915	KO	474	0.260057	0.739943	0.631252	iclipFeatures
chr5_135908378_135910994_Ywhag	2.88337	KO	475	0.760794	0.239206	0.606623	iclipFeatures
chr9_71478436_71479396_Polr2m	2.88258	KO	476	0.761527	0.238473	0.556466	iclipFeatures
chr4_101463667_101467771_Ak4	2.87556	KO	477	0.665452	0.334548	0.573196	iclipFeatures
chr9_55223657_55224433_Fbxo22	2.87373	KO	478	0.758028	0.241972	0.579859	iclipFeatures
chr8_71369474_71369732_Use1	2.87153	KO	479	0.401566	0.598434	0.629717	iclipFeatures
chr17_31604964_31607693_Pknox1	2.86924	KO	480	0.514505	0.485495	0.616084	iclipFeatures
chr17_56560964_56563424_Safb2	2.8677	KO	481	0.260057	0.739943	0.616084	iclipFeatures
chr6_83805400_83808835_Paip2b	2.86758	KO	482	0.758638	0.241362	0.587719	iclipFeatures
chr6_125168004_125168256_Ncapd2	2.8653	KO	483	0.657965	0.342035	0.569576	iclipFeatures
chr10_128360963_128362482_Cs	2.86507	KO	484	0.758638	0.241362	0.576874	iclipFeatures
chr6_85445216_85446435_Smyd5	2.86495	KO	485	0.624467	0.375533	0.572878	iclipFeatures
chr8_79683441_79685229_Abce1	2.86028	KO	486	0.761527	0.238473	0.612687	iclipFeatures
chr7_25711105_25712992_Ccdc97	2.85841	KO	487	0.3818	0.6182	0.59647	iclipFeatures
chr2_167034657_167034947_Ddx27	2.85749	KO	488	0.576596	0.423404	0.569482	iclipFeatures
chr2_72402366_72407501_Map3k20	2.85705	KO	489	0.474547	0.525453	0.569296	iclipFeatures
chr2_72402366_72407502_Zak	2.85705	KO	490	0.474547	0.525453	0.567712	iclipFeatures
chr7_16797739_16798274_Slc1a5	2.85689	KO	491	0.658143	0.341857	0.530368	iclipFeatures
chr2_163045360_163046154_Ift52	2.85652	KO	492	0.596469	0.403531	0.518194	iclipFeatures
chr14_20548911_20549900_Usp54	2.85574	KO	493	0.38809	0.61191	0.536398	iclipFeatures
chr8_45051409_45052257_Fat1	2.85428	KO	494	0.756773	0.243227	0.565023	iclipFeatures
chr15_81915029_81916611_Polr3h	2.85424	KO	495	0.608629	0.391371	0.585946	iclipFeatures
chr1_161088374_161090426_Klhl20	2.85405	KO	496	0.38809	0.61191	0.596402	iclipFeatures
chr1_165773757_165775308_Creg1	2.8534	KO	497	0.260057	0.739943	0.56276	iclipFeatures
chr7_143513578_143514637_Nap1l4	2.85156	KO	498	0.758638	0.241362	0.583183	iclipFeatures
chr16_13813272_13814841_Rrn3	2.85134	KO	499	0.760794	0.239206	0.582012	iclipFeatures
chr8_46534480_46536051_Acsl1	2.85009	KO	500	0.68378	0.31622	0.579892	iclipFeatures
chr3_103064233_103067914_Nras	2.84843	KO	501	0.762697	0.237303	0.593519	iclipFeatures
chr12_4876814_4877365_Ubxn2a	2.84776	KO	502	0.260057	0.739943	0.643377	iclipFeatures
chr14_54898056_54898137_Gm20521	2.84568	KO	503	0.592314	0.407686	0.628089	iclipFeatures
chr2_104054877_104057523_Fbxo3	2.84521	KO	504	0.745065	0.254935	0.618124	iclipFeatures
chr10_80614783_80615783_Scamp4	2.84266	KO	505	0.587424	0.412576	0.625825	iclipFeatures
chr1_43746965_43750480_Uxs1	2.84198	KO	506	0.524362	0.475638	0.575561	iclipFeatures
chr14_14796158_14799943_Slc4a7	2.84154	KO	507	0.758638	0.241362	0.576008	iclipFeatures
chr10_80614603_80615783_Adat3	2.84026	KO	508	0.605759	0.394241	0.584846	iclipFeatures
chr3_135570439_135571404_Manba	2.83974	KO	509	0.661139	0.338861	0.585909	iclipFeatures
chr6_144993834_145000262_Bcat1	2.83562	KO	510	0.760794	0.239206	0.595862	iclipFeatures
chr4_108633522_108634123_Cc2d1b	2.83544	KO	511	0.260057	0.739943	0.619505	iclipFeatures
chr4_62522648_62524050_Pole3	2.8338	KO	512	0.26453	0.73547	0.605261	iclipFeatures
chr16_84822636_84826375_Jam2	2.83248	KO	513	0.68069	0.31931	0.595401	iclipFeatures
chr9_115242470_115244050_Stt3b	2.82664	KO	514	0.755698	0.244302	0.577345	iclipFeatures
chr2_26409430_26410884_Sec16a	2.82576	KO	515	0.686953	0.313047	0.567032	iclipFeatures
chr6_71388633_71393124_Rmnd5a	2.82423	KO	516	0.760794	0.239206	0.586102	iclipFeatures
chr1_30940301_30943205_Ptp4a1	2.82375	KO	517	0.616198	0.383802	0.629085	iclipFeatures
chr17_10210178_10215430_Qk	2.82186	KO	518	0.507157	0.492843	0.587022	iclipFeatures
chr5_149046701_149048736_Hmgb1	2.82152	KO	519	0.480578	0.519422	0.586448	iclipFeatures
chr10_62743927_62744762_Ccar1	2.81761	KO	520	0.657668	0.342332	0.593447	iclipFeatures
chr12_66283377_66283712_Rpl10l	2.81698	KO	521	0.450752	0.549248	0.551054	iclipFeatures
chrX_101599525_101601789_Taf1	2.81621	KO	522	0.694364	0.305636	0.552473	iclipFeatures
chr7_141429743_141431104_Slc25a22	2.8159	KO	523	0.260057	0.739943	0.531995	iclipFeatures
chr7_28399518_28401800_Samd4b	2.81503	KO	524	0.749962	0.250038	0.521233	iclipFeatures
chr1_153908025_153909723_Glul	2.81476	KO	525	0.756943	0.243057	0.484314	iclipFeatures
chr6_113366024_113366987_Tada3	2.8145	KO	526	0.336865	0.663135	0.465244	iclipFeatures
chr11_69733996_69734409_Polr2a	2.81302	KO	527	0.630388	0.369612	0.422261	iclipFeatures
chr9_27097383_27098365_Jam3	2.81269	KO	528	0.302378	0.697622	0.472335	iclipFeatures
chr5_66016548_66019205_Rbm47	2.80883	KO	529	0.372955	0.627045	0.466138	iclipFeatures
chr15_78438486_78439303_Kctd17	2.80789	KO	530	0.288474	0.711526	0.448773	iclipFeatures
chr7_25624892_25625552_Atp5sl	2.80785	KO	531	0.260057	0.739943	0.491166	iclipFeatures
chr10_53607811_53609215_Asf1a	2.80704	KO	532	0.26453	0.73547	0.503991	iclipFeatures
chr13_37971400_37979738_Ssr1	2.80615	KO	533	0.760794	0.239206	0.549617	iclipFeatures
chr6_134266474_134270158_Etv6	2.80613	KO	534	0.687996	0.312004	0.588185	iclipFeatures
chr2_35728225_35730994_Dab2ip	2.80385	KO	535	0.583294	0.416706	0.634522	iclipFeatures
chr9_96332654_96333523_Atp1b3	2.80356	KO	536	0.760794	0.239206	0.634522	iclipFeatures
chr2_27534857_27536538_Wdr5	2.80315	KO	537	0.758638	0.241362	0.668057	iclipFeatures
chr15_103298740_103299871_Copz1	2.80262	KO	538	0.758638	0.241362	0.618061	iclipFeatures
chr4_119136446_119137983_Slc2a1	2.80213	KO	539	0.758638	0.241362	0.577335	iclipFeatures
chr17_83501916_83502602_Cox7a2l	2.79889	KO	540	0.751843	0.248157	0.567521	iclipFeatures
chr9_108501421_108501699_Usp19	2.79882	KO	541	0.260057	0.739943	0.567305	iclipFeatures
chr15_98812795_98813372_Prkag1	2.79865	KO	542	0.59988	0.40012	0.540114	iclipFeatures
chr9_86574649_86574899_Rwdd2a	2.79842	KO	543	0.260833	0.739167	0.490458	iclipFeatures
chr7_127925461_127925837_Kat8	2.79591	KO	544	0.280739	0.719261	0.490747	iclipFeatures
chr3_35892104_35895619_Dcun1d1	2.79491	KO	545	0.48515	0.51485	0.491715	iclipFeatures
chr17_74388312_74391116_Spast	2.79369	KO	546	0.758638	0.241362	0.516375	iclipFeatures
chr7_126765239_126765819_Mapk3	2.7892	KO	547	0.486721	0.513279	0.500981	iclipFeatures
chr1_84036292_84038030_Pid1	2.78884	KO	548	0.26208	0.73792	0.518726	iclipFeatures
chr11_17198306_17200380_Ppp3r1	2.78812	KO	549	0.761527	0.238473	0.516658	iclipFeatures
chr15_12184138_12185683_Zfr	2.78773	KO	550	0.761527	0.238473	0.542309	iclipFeatures
chr13_85214698_85216103_Rasa1	2.78552	KO	551	0.506661	0.493339	0.525371	iclipFeatures
chr10_80899449_80900160_Timm13	2.78528	KO	552	0.445935	0.554065	0.547633	iclipFeatures
chr19_6227764_6228383_Ppp2r5b	2.78375	KO	553	0.438284	0.561716	0.56506	iclipFeatures
chr2_148871717_148871971_Cst3	2.77744	KO	554	0.260057	0.739943	0.564771	iclipFeatures
chr9_21404832_21405363_Ilf3	2.77541	KO	555	0.74166	0.25834	0.547395	iclipFeatures
chr9_66508324_66508775_Herc1	2.77515	KO	556	0.589261	0.410739	0.544434	iclipFeatures
chr4_134897848_134898430_Tmem50a	2.77011	KO	557	0.709338	0.290662	0.525846	iclipFeatures
chr11_115855473_115855780_Llgl2	2.76806	KO	558	0.436347	0.563653	0.55626	iclipFeatures
chr16_32016286_32020179_Pak2	2.76225	KO	559	0.758638	0.241362	0.599691	iclipFeatures
chr5_91948841_91949735_Rchy1	2.76215	KO	560	0.587771	0.412229	0.600331	iclipFeatures
chr3_95032690_95033343_Psmd4	2.75991	KO	561	0.477048	0.522952	0.585039	iclipFeatures
chr17_17521412_17521662_Lnpep	2.75682	KO	562	0.260057	0.739943	0.540189	iclipFeatures
chr15_57869501_57871777_Derl1	2.75244	KO	563	0.742423	0.257577	0.567013	iclipFeatures
chr2_29738070_29740978_Rapgef1	2.75109	KO	564	0.694364	0.305636	0.545264	iclipFeatures
chr9_25307552_25308571_Sept7	2.74183	KO	565	0.748058	0.251942	0.528091	iclipFeatures
chr1_171281944_171282211_Usp21	2.73948	KO	566	0.436347	0.563653	0.547319	iclipFeatures
chr3_37052540_37053033_4932438A13Rik	2.73939	KO	567	0.260833	0.739167	0.596145	iclipFeatures
chr2_60292102_60294009_Ly75	2.73719	KO	568	0.704593	0.295407	0.597472	iclipFeatures
chr17_25926419_25927736_Pigq	2.73677	KO	569	0.54115	0.45885	0.59445	iclipFeatures
chr2_121491910_121494664_Mfap1a	2.73632	KO	570	0.416038	0.583962	0.594874	iclipFeatures
chr11_12236607_12238041_Cobl	2.73602	KO	571	0.669326	0.330674	0.627103	iclipFeatures
chr2_14146480_14149634_Stam	2.72758	KO	572	0.748315	0.251685	0.676723	iclipFeatures
chr3_16213978_16217037_Ythdf3	2.72701	KO	573	0.755698	0.244302	0.676328	iclipFeatures
chr2_174465066_174465813_Slmo2	2.72284	KO	574	0.66414	0.33586	0.648219	iclipFeatures
chr9_58874679_58877273_Neo1	2.7197	KO	575	0.752297	0.247703	0.657433	iclipFeatures
chr11_101321771_101323537_Psme3	2.71938	KO	576	0.758638	0.241362	0.646549	iclipFeatures
chr6_38502287_38512764_Ubn2	2.71853	KO	577	0.75703	0.24297	0.641261	iclipFeatures
chr7_45376452_45376711_Snrnp70	2.71829	KO	578	0.70065	0.29935	0.615215	iclipFeatures
chr19_4098565_4099018_Cdk2ap2	2.71818	KO	579	0.260057	0.739943	0.593395	iclipFeatures
chr12_81492193_81502166_Synj2bp	2.71569	KO	580	0.508181	0.491819	0.584874	iclipFeatures
chr5_135734812_135735329_Por	2.71555	KO	581	0.56048	0.43952	0.57572	iclipFeatures
chr1_39551295_39552471_Rnf149	2.71184	KO	582	0.695435	0.304565	0.561579	iclipFeatures
chr19_53371736_53375810_Mxi1	2.70978	KO	583	0.495241	0.504759	0.553503	iclipFeatures
chr2_130681081_130681614_Itpa	2.70875	KO	584	0.445935	0.554065	0.583399	iclipFeatures
chr3_95253673_95254995_Prune	2.70795	KO	585	0.667096	0.332904	0.598347	iclipFeatures
chr3_95253673_95254995_Prune1	2.70795	KO	586	0.667096	0.332904	0.617408	iclipFeatures
chr4_49655977_49656887_Rnf20	2.70507	KO	587	0.615613	0.384387	0.623568	iclipFeatures
chr5_114363566_114365641_Kctd10	2.70284	KO	588	0.619899	0.380101	0.613646	iclipFeatures
chr4_86576860_86577285_Rraga	2.70217	KO	589	0.559008	0.440992	0.595058	iclipFeatures
chr4_132899212_132901221_Fam76a	2.69757	KO	590	0.657668	0.342332	0.597385	iclipFeatures
chr12_3247427_3249953_Rab10	2.69623	KO	591	0.75109	0.24891	0.606755	iclipFeatures
chr11_5966044_5967781_Ykt6	2.69514	KO	592	0.75703	0.24297	0.621273	iclipFeatures
chr14_52261758_52263709_Rab2b	2.69056	KO	593	0.396023	0.603977	0.628719	iclipFeatures
chr11_59461196_59463079_Zfp867	2.68968	KO	594	0.260057	0.739943	0.635203	iclipFeatures
chr2_164424246_164426085_Sdc4	2.68871	KO	595	0.690366	0.309634	0.641295	iclipFeatures
chr8_107183668_107187471_Cyb5b	2.68829	KO	596	0.760794	0.239206	0.636101	iclipFeatures
chr11_55499668_55504838_G3bp1	2.68776	KO	597	0.760794	0.239206	0.635248	iclipFeatures
chr5_27740079_27742487_Paxip1	2.68754	KO	598	0.694364	0.305636	0.671414	iclipFeatures
chr9_108602941_108605081_Arih2	2.6875	KO	599	0.623841	0.376159	0.710627	iclipFeatures
chr11_100885097_100888769_Stat3	2.68312	KO	600	0.718594	0.281406	0.697027	iclipFeatures
chr2_165827123_165828133_Zmynd8	2.68182	KO	601	0.699149	0.300851	0.696262	iclipFeatures
chr2_131146314_131146874_1700037H04Rik	2.67797	KO	602	0.748498	0.251502	0.696046	iclipFeatures
chr2_132052495_132056668_Slc23a2	2.67736	KO	603	0.757684	0.242316	0.696153	iclipFeatures
chr1_181166133_181168994_Cnih4	2.67522	KO	604	0.652185	0.347815	0.659775	iclipFeatures
chr9_42251594_42255341_Sc5d	2.67286	KO	605	0.554373	0.445627	0.627316	iclipFeatures
chr6_113514873_113516051_Emc3	2.6711	KO	606	0.753137	0.246863	0.633104	iclipFeatures
chr17_27751231_27753959_D17Wsu92e	2.67084	KO	607	0.758638	0.241362	0.62798	iclipFeatures
chr2_112360507_112363163_Slc12a6	2.66884	KO	608	0.695435	0.304565	0.628149	iclipFeatures
chr9_123259052_123259684_Tmem158	2.66719	KO	609	0.260057	0.739943	0.628697	iclipFeatures
chr8_88746958_88751946_Cyld	2.66323	KO	610	0.394001	0.605999	0.649413	iclipFeatures
chr2_180718011_180721600_Gid8	2.66173	KO	611	0.75703	0.24297	0.613562	iclipFeatures
chr5_117091677_117092932_Suds3	2.66152	KO	612	0.697257	0.302743	0.563704	iclipFeatures
chr1_78666729_78671512_Utp14b	2.66028	KO	613	0.759376	0.240624	0.538007	iclipFeatures
chr11_115180509_115181181_Slc9a3r1	2.65913	KO	614	0.657668	0.342332	0.586059	iclipFeatures
chr19_6375995_6378038_Sf1	2.65902	KO	615	0.761527	0.238473	0.589709	iclipFeatures
chr3_108678637_108679578_Gpsm2	2.65676	KO	616	0.394634	0.605366	0.561135	iclipFeatures
chr7_143688761_143689818_Osbpl5	2.65517	KO	617	0.260057	0.739943	0.567431	iclipFeatures
chr14_8090554_8091846_LOC109729085	2.65389	KO	618	0.438467	0.561533	0.558256	iclipFeatures
chr4_137656121_137658537_Usp48	2.65382	KO	619	0.740576	0.259424	0.561421	iclipFeatures
chr19_5133684_5134909_Pacs1	2.65127	KO	620	0.430498	0.569502	0.560213	iclipFeatures
chr3_14605717_14606309_E2f5	2.64747	KO	621	0.471295	0.528705	0.571568	iclipFeatures
chr15_58454932_58457802_Fam91a1	2.64623	KO	622	0.760212	0.239788	0.571568	iclipFeatures
chr3_57455643_57458969_Wwtr1	2.6447	KO	623	0.667627	0.332373	0.590976	iclipFeatures
chr6_82646700_82648022_Pole4	2.6447	KO	624	0.689318	0.310682	0.593188	iclipFeatures
chr2_127297291_127298934_Stard7	2.64294	KO	625	0.749448	0.250552	0.599455	iclipFeatures
chr6_30366379_30366745_Zc3hc1	2.6418	KO	626	0.508181	0.491819	0.590149	iclipFeatures
chr8_53523172_53523422_Aga	2.64019	KO	627	0.260057	0.739943	0.560221	iclipFeatures
chr4_133605298_133608655_Zdhhc18	2.63882	KO	628	0.632545	0.367455	0.567624	iclipFeatures
chr14_37120312_37122141_Ghitm	2.63612	KO	629	0.762697	0.237303	0.550221	iclipFeatures
chr3_108581177_108583222_Taf13	2.63579	KO	630	0.493168	0.506832	0.530918	iclipFeatures
chr16_35311130_35314086_Sec22a	2.63237	KO	631	0.37824	0.62176	0.555964	iclipFeatures
chr2_154559399_154560687_E2f1	2.629	KO	632	0.46093	0.53907	0.594731	iclipFeatures
chr14_26413167_26414988_Slmap	2.62772	KO	633	0.74166	0.25834	0.607556	iclipFeatures
chr17_48416786_48417270_Oard1	2.62641	KO	634	0.515285	0.484715	0.568475	iclipFeatures
chr5_138312044_138312393_Stag3	2.62451	KO	635	0.55642	0.44358	0.595096	iclipFeatures
chr15_83125967_83127880_Poldip3	2.62082	KO	636	0.758638	0.241362	0.632975	iclipFeatures
chr17_42792950_42796327_Cd2ap	2.6204	KO	637	0.647727	0.352273	0.65651	iclipFeatures
chr14_47319362_47323204_Mapk1ip1l	2.62013	KO	638	0.760794	0.239206	0.627778	iclipFeatures
chr5_29766430_29767103_Dnajb6	2.61988	KO	639	0.371884	0.628116	0.619884	iclipFeatures
chr1_153455757_153456068_Dhx9	2.61385	KO	640	0.759376	0.240624	0.602422	iclipFeatures
chr11_97836245_97838766_Lasp1	2.61278	KO	641	0.75703	0.24297	0.552564	iclipFeatures
chr11_100582817_100583098_Dnajc7	2.61096	KO	642	0.696288	0.303712	0.545509	iclipFeatures
chr2_34849733_34852575_Psmd5	2.61089	KO	643	0.454337	0.545663	0.545294	iclipFeatures
chr11_72312006_72313733_Xaf1	2.60822	KO	644	0.436347	0.563653	0.553539	iclipFeatures
chr11_104328009_104332091_Mapt	2.60355	KO	645	0.3818	0.6182	0.553681	iclipFeatures
chr5_137596644_137597021_Mospd3	2.60239	KO	646	0.260057	0.739943	0.527071	iclipFeatures
chr8_84095771_84096992_Rfx1	2.60212	KO	647	0.577178	0.422822	0.52399	iclipFeatures
chr3_142790901_142793810_Pkn2	2.60203	KO	648	0.758638	0.241362	0.529057	iclipFeatures
chr8_95718754_95719010_Setd6	2.60028	KO	649	0.454337	0.545663	0.560472	iclipFeatures
chr8_4245694_4247897_Map2k7	2.59957	KO	650	0.760794	0.239206	0.569997	iclipFeatures
chr8_26141080_26143871_Rnf170	2.59869	KO	651	0.490932	0.509068	0.619929	iclipFeatures
chr5_115097197_115098793_Sppl3	2.59527	KO	652	0.665485	0.334515	0.588217	iclipFeatures
chr9_57594959_57596233_Ulk3	2.59497	KO	653	0.505004	0.494996	0.588481	iclipFeatures
chr10_52436667_52440192_Nus1	2.5934	KO	654	0.750497	0.249503	0.603232	iclipFeatures
chr5_105914926_105915820_Zfp326	2.59318	KO	655	0.477048	0.522952	0.5896	iclipFeatures
chr7_100639319_100641268_Rab6a	2.59291	KO	656	0.759376	0.240624	0.616586	iclipFeatures
chr5_8747561_8748575_Abcb1a	2.59049	KO	657	0.260057	0.739943	0.610276	iclipFeatures
chr15_94577940_94579951_Twf1	2.5884	KO	658	0.761287	0.238713	0.585781	iclipFeatures
chr4_139347433_139347695_Mrto4	2.58635	KO	659	0.601841	0.398159	0.550132	iclipFeatures
chr10_44363052_44364299_Atg5	2.58436	KO	660	0.624473	0.375527	0.528432	iclipFeatures
chr11_88339381_88344703_Msi2	2.58318	KO	661	0.760794	0.239206	0.517713	iclipFeatures
chr13_17715961_17718060_Cdk13	2.58098	KO	662	0.602384	0.397616	0.55204	iclipFeatures
chr16_91270659_91271939_Olig1	2.58094	KO	663	0.260057	0.739943	0.544456	iclipFeatures
chr16_5195279_5195847_Nagpa	2.57982	KO	664	0.394001	0.605999	0.559586	iclipFeatures
chr16_56805160_56806682_Tmem45a	2.57335	KO	665	0.260057	0.739943	0.55304	iclipFeatures
chr14_105307885_105309298_Ndfip2	2.57289	KO	666	0.652185	0.347815	0.524021	iclipFeatures
chr8_41332008_41334087_Pcm1	2.5712	KO	667	0.603327	0.396673	0.520237	iclipFeatures
chr9_18312921_18317442_Chordc1	2.56823	KO	668	0.685447	0.314553	0.522094	iclipFeatures
chr19_24094501_24095424_Tjp2	2.56742	KO	669	0.753137	0.246863	0.55686	iclipFeatures
chr16_90719311_90719897_Mis18a	2.56633	KO	670	0.559008	0.440992	0.606194	iclipFeatures
chr1_57955100_57956327_Kctd18	2.56582	KO	671	0.470605	0.529395	0.616085	iclipFeatures
chr10_81388023_81388354_Dohh	2.56377	KO	672	0.56455	0.43545	0.581758	iclipFeatures
chr10_61736734_61738653_Aifm2	2.56335	KO	673	0.278626	0.721374	0.589292	iclipFeatures
chr9_120494957_120495330_Eif1b	2.56291	KO	674	0.74166	0.25834	0.584645	iclipFeatures
chr6_125193269_125196269_Mrpl51	2.56281	KO	675	0.753396	0.246604	0.604447	iclipFeatures
chr9_113651743_113654932_Pdcd6ip	2.5628	KO	676	0.75109	0.24891	0.622764	iclipFeatures
chr11_119918659_119919552_Chmp6	2.56253	KO	677	0.260057	0.739943	0.616017	iclipFeatures
chr19_3454928_3456999_Ppp6r3	2.5615	KO	678	0.760794	0.239206	0.614607	iclipFeatures
chr2_20808039_20810713_Etl4	2.56134	KO	679	0.706666	0.293334	0.6162	iclipFeatures
chr18_37843600_37845340_Diaph1	2.56022	KO	680	0.75703	0.24297	0.585065	iclipFeatures
chr15_36477667_36479256_Ankrd46	2.55983	KO	681	0.653771	0.346229	0.536039	iclipFeatures
chr9_108572310_108572949_Wdr6	2.55982	KO	682	0.497081	0.502919	0.57947	iclipFeatures
chr4_108814294_108816966_Btf3l4	2.55976	KO	683	0.26453	0.73547	0.579	iclipFeatures
chr7_99837568_99839938_Spcs2	2.55876	KO	684	0.757587	0.242413	0.570982	iclipFeatures
chr4_24901966_24905001_Ndufaf4	2.55567	KO	685	0.442042	0.557958	0.570672	iclipFeatures
chr1_57388236_57388499_Tyw5	2.5536	KO	686	0.260833	0.739167	0.574839	iclipFeatures
chr7_79875323_79880483_Ap3s2	2.55346	KO	687	0.694364	0.305636	0.586266	iclipFeatures
chr17_31844247_31846282_Sik1	2.55171	KO	688	0.756099	0.243901	0.611163	iclipFeatures
chr5_110648417_110648863_Noc4l	2.54997	KO	689	0.626488	0.373512	0.572499	iclipFeatures
chr12_73272534_73273988_Mnat1	2.54453	KO	690	0.753927	0.246073	0.603938	iclipFeatures
chr8_9988418_9992155_Abhd13	2.5424	KO	691	0.695435	0.304565	0.632102	iclipFeatures
chr4_149564250_149566437_Ctnnbip1	2.54207	KO	692	0.611356	0.388644	0.588671	iclipFeatures
chr12_105613538_105617072_Atg2b	2.54155	KO	693	0.513498	0.486502	0.564988	iclipFeatures
chr11_102264696_102265187_BC030867	2.54065	KO	694	0.370943	0.629057	0.528345	iclipFeatures
chr10_61098641_61100867_Sgpl1	2.53699	KO	695	0.756441	0.243559	0.513779	iclipFeatures
chr11_83294387_83294637_AA465934	2.52933	KO	696	0.542466	0.457534	0.520099	iclipFeatures
chr3_155084917_155086615_Fpgt	2.52529	KO	697	0.260057	0.739943	0.509564	iclipFeatures
chr19_8793124_8793390_Polr2g	2.52338	KO	698	0.519272	0.480728	0.527651	iclipFeatures
chr16_34013131_34013953_Kalrn	2.51872	KO	699	0.260057	0.739943	0.552093	iclipFeatures
chr2_127800199_127801375_Bub1	2.51758	KO	700	0.608261	0.391739	0.513543	iclipFeatures
chr18_42574719_42575785_Tcerg1	2.5135	KO	701	0.758638	0.241362	0.535352	iclipFeatures
chr9_111223970_111225668_Lrrfip2	2.51341	KO	702	0.506011	0.493989	0.57888	iclipFeatures
chr10_111984681_111988432_Krr1	2.51152	KO	703	0.694364	0.305636	0.596389	iclipFeatures
chr3_127807006_127808490_Ap1ar	2.50902	KO	704	0.615367	0.384633	0.608659	iclipFeatures
chr8_33619585_33621529_Ubxn8	2.50859	KO	705	0.370943	0.629057	0.598413	iclipFeatures
chr9_110939602_110940703_Tdgf1	2.50822	KO	706	0.760554	0.239446	0.551221	iclipFeatures
chr4_94565138_94569415_Plaa	2.50685	KO	707	0.695335	0.304665	0.562181	iclipFeatures
chr17_12911346_12911730_Mrpl18	2.50651	KO	708	0.694364	0.305636	0.56691	iclipFeatures
chr9_21067512_21067769_Fdx1l	2.50611	KO	709	0.382752	0.617248	0.53166	iclipFeatures
chr15_39146604_39146856_Dcaf13	2.50559	KO	710	0.505807	0.494193	0.532389	iclipFeatures
chr7_100272429_100278872_Pgm2l1	2.50349	KO	711	0.28671	0.71329	0.48234	iclipFeatures
chr12_111655566_111656227_Mark3	2.50227	KO	712	0.615613	0.384387	0.478384	iclipFeatures
chr9_118581848_118582520_Golga4	2.50224	KO	713	0.74166	0.25834	0.484812	iclipFeatures
chr18_67225048_67225298_Mppe1	2.50224	KO	714	0.26286	0.73714	0.521567	iclipFeatures
chr10_100443901_100446928_Tmtc3	2.50091	KO	715	0.37824	0.62176	0.521667	iclipFeatures
chr13_112990057_112990778_Ccno	2.50055	KO	716	0.260057	0.739943	0.551695	iclipFeatures
chr17_80029486_80030592_Hnrnpll	2.50042	KO	717	0.655779	0.344221	0.536636	iclipFeatures
chr8_106127917_106130538_Nfatc3	2.50018	KO	718	0.758638	0.241362	0.508938	iclipFeatures
chr4_117271462_117272303_Rnf220	2.49949	KO	719	0.750308	0.249692	0.55323	iclipFeatures
chr7_111055785_111056377_Ctr9	2.4934	KO	720	0.506803	0.493197	0.582067	iclipFeatures
chr7_130532523_130532780_Nsmce4a	2.4933	KO	721	0.586993	0.413007	0.630568	iclipFeatures
chr8_95372520_95375080_Mmp15	2.49327	KO	722	0.465024	0.534976	0.602084	iclipFeatures
chr7_127564945_127565270_Tmem265	2.49206	KO	723	0.464681	0.535319	0.557803	iclipFeatures
chr14_118482691_118484332_Abcc4	2.49104	KO	724	0.705774	0.294226	0.558636	iclipFeatures
chr15_99620495_99621524_Racgap1	2.4903	KO	725	0.666609	0.333391	0.583658	iclipFeatures
chr8_25154551_25159751_Tacc1	2.48961	KO	726	0.745065	0.254935	0.590678	iclipFeatures
chr15_79761448_79762360_Dnal4	2.48956	KO	727	0.370943	0.629057	0.581364	iclipFeatures
chr4_72109944_72118283_Tle1	2.48847	KO	728	0.315827	0.684173	0.601829	iclipFeatures
chr16_37509789_37511388_Gtf2e1	2.48788	KO	729	0.758638	0.241362	0.589839	iclipFeatures
chr3_116902984_116908177_Frrs1	2.48467	KO	730	0.75703	0.24297	0.597685	iclipFeatures
chr11_97328568_97329922_Mrpl45	2.48252	KO	731	0.657193	0.342807	0.588945	iclipFeatures
chr6_34880425_34880803_Wdr91	2.48169	KO	732	0.371884	0.628116	0.612221	iclipFeatures
chr6_148355346_148355596_Rps4l	2.47994	KO	733	0.669326	0.330674	0.656045	iclipFeatures
chr7_102082273_102083762_Xndc1	2.47946	KO	734	0.585878	0.414122	0.613971	iclipFeatures
chrX_105797614_105800174_Atrx	2.47766	KO	735	0.745065	0.254935	0.564273	iclipFeatures
chr19_44139246_44139681_Bloc1s2	2.47701	KO	736	0.657668	0.342332	0.573936	iclipFeatures
chr4_85387753_85389380_Sh3gl2	2.47229	KO	737	0.603697	0.396303	0.566244	iclipFeatures
chr4_41291299_41293261_Dcaf12	2.47088	KO	738	0.754076	0.245924	0.574694	iclipFeatures
chr4_107233513_107233765_Lrrc42	2.46495	KO	739	0.33789	0.66211	0.562113	iclipFeatures
chr6_28239926_28241656_Zfp800	2.46469	KO	740	0.260057	0.739943	0.563176	iclipFeatures
chr10_61691401_61693297_Sar1a	2.46444	KO	741	0.753824	0.246176	0.563568	iclipFeatures
chr3_96711489_96712144_Polr3c	2.46376	KO	742	0.294956	0.705044	0.529204	iclipFeatures
chr3_122266317_122270732_Gclm	2.46347	KO	743	0.753824	0.246176	0.518569	iclipFeatures
chr18_21127200_21129124_Garem1	2.46329	KO	744	0.460074	0.539926	0.560644	iclipFeatures
chr9_119433461_119442148_Acvr2b	2.46204	KO	745	0.755698	0.244302	0.604181	iclipFeatures
chr5_25271793_25273665_Kmt2c	2.46108	KO	746	0.66158	0.33842	0.585087	iclipFeatures
chr11_83226334_83226584_AI662270	2.45386	KO	747	0.260057	0.739943	0.631455	iclipFeatures
chr8_106200437_106201021_Slc7a6os	2.45201	KO	748	0.647727	0.352273	0.623239	iclipFeatures
chr9_22331213_22333049_Anln	2.44981	KO	749	0.758638	0.241362	0.620866	iclipFeatures
chr11_100321097_100322099_Eif1	2.44871	KO	750	0.695435	0.304565	0.621376	iclipFeatures
chr4_135870917_135872013_Pnrc2	2.44865	KO	751	0.562877	0.437123	0.631297	iclipFeatures
chr13_97126874_97129522_Fam169a	2.44855	KO	752	0.758638	0.241362	0.67502	iclipFeatures
chr19_47082644_47083479_Taf5	2.44844	KO	753	0.671661	0.328339	0.668123	iclipFeatures
chr7_140134084_140137224_Paox	2.4478	KO	754	0.436347	0.563653	0.665812	iclipFeatures
chr7_34140687_34141466_Uba2	2.4466	KO	755	0.760794	0.239206	0.672348	iclipFeatures
chr6_35508823_35512295_Mtpn	2.44299	KO	756	0.760794	0.239206	0.68591	iclipFeatures
chr17_45660170_45660788_Tmem63b	2.44222	KO	757	0.697288	0.302712	0.636052	iclipFeatures
chr9_121754332_121756843_Nktr	2.4421	KO	758	0.578754	0.421246	0.643393	iclipFeatures
chr15_81951104_81951489_Pmm1	2.43988	KO	759	0.735531	0.264469	0.654004	iclipFeatures
chr17_6738040_6739302_Ezr	2.43863	KO	760	0.760794	0.239206	0.630493	iclipFeatures
chr5_20986644_20987432_Ptpn12	2.43754	KO	761	0.698502	0.301498	0.610919	iclipFeatures
chr8_94067953_94068275_Bbs2	2.43266	KO	762	0.260057	0.739943	0.58613	iclipFeatures
chr3_95181761_95188669_Gabpb2	2.4308	KO	763	0.745065	0.254935	0.57189	iclipFeatures
chr17_25242548_25242799_Tsr3	2.43074	KO	764	0.542466	0.457534	0.557263	iclipFeatures
chr3_132660497_132660756_Aimp1	2.42951	KO	765	0.52568	0.47432	0.542745	iclipFeatures
chr17_24693186_24694447_Gfer	2.42788	KO	766	0.565052	0.434948	0.517184	iclipFeatures
chr16_90751526_90751984_Urb1	2.42641	KO	767	0.449405	0.550595	0.566881	iclipFeatures
chr8_124671326_124672082_Ttc13	2.42617	KO	768	0.436347	0.563653	0.55998	iclipFeatures
chr18_67318510_67319146_Impa2	2.42439	KO	769	0.589259	0.410741	0.535972	iclipFeatures
chr12_80949920_80950507_Srsf5	2.4223	KO	770	0.615613	0.384387	0.522804	iclipFeatures
chr11_117815518_117815950_Tk1	2.42223	KO	771	0.442892	0.557108	0.540729	iclipFeatures
chr11_97205841_97207115_Npepps	2.42131	KO	772	0.75703	0.24297	0.539423	iclipFeatures
chr15_7191169_7197489_Lifr	2.42068	KO	773	0.676062	0.323938	0.521794	iclipFeatures
chr5_36952642_36955078_Ppp2r2c	2.41736	KO	774	0.302378	0.697622	0.534785	iclipFeatures
chr6_57506501_57510717_Ppm1k	2.41639	KO	775	0.394001	0.605999	0.540079	iclipFeatures
chr17_78649912_78655489_Strn	2.4132	KO	776	0.744299	0.255701	0.532978	iclipFeatures
chr9_21507379_21508172_Tmed1	2.41248	KO	777	0.436347	0.563653	0.502634	iclipFeatures
chr2_102449365_102450235_Fjx1	2.41028	KO	778	0.260057	0.739943	0.461033	iclipFeatures
chr4_133847289_133848051_Rps6ka1	2.40963	KO	779	0.719172	0.280828	0.456801	iclipFeatures
chr13_96637070_96640167_Col4a3bp	2.40837	KO	780	0.668554	0.331446	0.483649	iclipFeatures
chr14_121538364_121543624_Dock9	2.40773	KO	781	0.371884	0.628116	0.453588	iclipFeatures
chr11_115964392_115966725_Sap30bp	2.40743	KO	782	0.453583	0.546417	0.435959	iclipFeatures
chr19_6261837_6262335_Atg2a	2.40539	KO	783	0.260057	0.739943	0.475834	iclipFeatures
chr9_78178632_78178882_C920006O11Rik	2.40527	KO	784	0.260057	0.739943	0.479996	iclipFeatures
chr12_17429234_17430095_Nol10	2.40354	KO	785	0.662481	0.337519	0.460379	iclipFeatures
chr19_34806935_34812327_Pank1	2.40138	KO	786	0.443691	0.556309	0.497346	iclipFeatures
chr8_105844671_105844927_Cenpt	2.39974	KO	787	0.260057	0.739943	0.521616	iclipFeatures
chr4_48561253_48561925_Msantd3	2.39792	KO	788	0.658805	0.341195	0.571137	iclipFeatures
chr11_94643541_94645217_Lrrc59	2.3971	KO	789	0.760794	0.239206	0.607436	iclipFeatures
chr14_76134838_76137379_Nufip1	2.39685	KO	790	0.472385	0.527615	0.617267	iclipFeatures
chr13_106794437_106795630_Ipo11	2.39677	KO	791	0.741546	0.258454	0.648762	iclipFeatures
chr1_4773199_4776616_Mrpl15	2.39551	KO	792	0.696288	0.303712	0.68878	iclipFeatures
chr8_93971587_93973166_Amfr	2.39425	KO	793	0.755265	0.244735	0.690968	iclipFeatures
chr16_21934323_21934824_Tmem41a	2.39387	KO	794	0.623046	0.376954	0.640894	iclipFeatures
chr16_38240569_38246084_Gsk3b	2.39194	KO	795	0.760794	0.239206	0.669593	iclipFeatures
chr10_77616258_77618331_Sumo3	2.39172	KO	796	0.758638	0.241362	0.660171	iclipFeatures
chr1_72159232_72160884_Mreg	2.39119	KO	797	0.660235	0.339765	0.624748	iclipFeatures
chr4_32774139_32775217_Mdn1	2.391	KO	798	0.68069	0.31931	0.6253	iclipFeatures
chr7_4751790_4752041_Cox6b2	2.39	KO	799	0.260057	0.739943	0.638699	iclipFeatures
chr5_65594894_65598989_Ube2k	2.38994	KO	800	0.759376	0.240624	0.588703	iclipFeatures
chr4_94500078_94501024_Caap1	2.3898	KO	801	0.647326	0.352674	0.538845	iclipFeatures
chrX_73086292_73087127_Xlr3a	2.3897	KO	802	0.342049	0.657951	0.51711	iclipFeatures
chr7_59304930_59311727_Ube3a	2.38761	KO	803	0.760794	0.239206	0.51877	iclipFeatures
chr6_86524490_86524844_Pcbp1	2.38652	KO	804	0.75703	0.24297	0.558531	iclipFeatures
chr14_78559354_78559604_Dgkh	2.38498	KO	805	0.260833	0.739167	0.538642	iclipFeatures
chrX_13169484_13173328_Usp9x	2.38413	KO	806	0.260057	0.739943	0.54057	iclipFeatures
chr17_56606032_56606294_Safb	2.38243	KO	807	0.442892	0.557108	0.575801	iclipFeatures
chr16_50191843_50197558_Bbx	2.3819	KO	808	0.697288	0.302712	0.546851	iclipFeatures
chr12_32975724_32979502_Sypl	2.38189	KO	809	0.657668	0.342332	0.530161	iclipFeatures
chr17_30208152_30210020_Zfand3	2.37517	KO	810	0.56048	0.43952	0.530364	iclipFeatures
chr3_88055729_88055994_Gpatch4	2.37415	KO	811	0.666609	0.333391	0.580222	iclipFeatures
chr6_38603475_38607212_Luc7l2	2.37143	KO	812	0.694364	0.305636	0.611797	iclipFeatures
chr5_35556202_35557825_Trmt44	2.3706	KO	813	0.471295	0.528705	0.571936	iclipFeatures
chrX_20517896_20519939_Jade3	2.37051	KO	814	0.590128	0.409872	0.582249	iclipFeatures
chr7_44991221_44991478_Bcl2l12	2.36987	KO	815	0.26286	0.73714	0.552409	iclipFeatures
chr19_4800565_4802507_Rbm14	2.36705	KO	816	0.758638	0.241362	0.551628	iclipFeatures
chr6_115617731_115622624_Mkrn2	2.36421	KO	817	0.758638	0.241362	0.557719	iclipFeatures
chr2_26055534_26059961_Nacc2	2.36351	KO	818	0.298682	0.701318	0.561089	iclipFeatures
chr3_65379654_65382015_Ssr3	2.36338	KO	819	0.760794	0.239206	0.528082	iclipFeatures
chr15_99316491_99317018_Prpf40b	2.3626	KO	820	0.26208	0.73792	0.577474	iclipFeatures
chr6_93675452_93678945_Magi1	2.36183	KO	821	0.658805	0.341195	0.561979	iclipFeatures
chr19_7425894_7427829_Rtn3	2.36163	KO	822	0.755265	0.244735	0.512199	iclipFeatures
chr12_84343033_84343830_Zfp410	2.36108	KO	823	0.505004	0.494996	0.556497	iclipFeatures
chr15_82041318_82042105_Nhp2l1	2.36069	KO	824	0.260057	0.739943	0.554583	iclipFeatures
chr10_80287711_80288413_Dazap1	2.3571	KO	825	0.756773	0.243227	0.604455	iclipFeatures
chr9_106214995_106215390_Twf2	2.3565	KO	826	0.603697	0.396303	0.56458	iclipFeatures
chr9_66514636_66518593_Usp3	2.35563	KO	827	0.260833	0.739167	0.551702	iclipFeatures
chr17_24047719_24049414_Kctd5	2.35498	KO	828	0.74166	0.25834	0.538296	iclipFeatures
chr3_158005870_158008034_Ankrd13c	2.3548	KO	829	0.74166	0.25834	0.549385	iclipFeatures
chr6_119923968_119926369_Wnk1	2.35307	KO	830	0.760794	0.239206	0.535792	iclipFeatures
chr2_150114405_150118009_Zfp120	2.34943	KO	831	0.260057	0.739943	0.550567	iclipFeatures
chr2_181582102_181584821_Zfp512b	2.3474	KO	832	0.626488	0.373512	0.600347	iclipFeatures
chr2_130684107_130684433_Slc4a11	2.34596	KO	833	0.370943	0.629057	0.602261	iclipFeatures
chr2_30960560_30960946_Tor1a	2.34567	KO	834	0.370943	0.629057	0.604174	iclipFeatures
chr4_126593042_126593909_Clspn	2.3443	KO	835	0.620849	0.379151	0.602435	iclipFeatures
chr2_38723368_38727826_Nr6a1	2.34294	KO	836	0.751442	0.248558	0.634327	iclipFeatures
chr6_108821552_108825278_Arl8b	2.34103	KO	837	0.758638	0.241362	0.634594	iclipFeatures
chr8_104348190_104355126_Cmtm4	2.34089	KO	838	0.760794	0.239206	0.656425	iclipFeatures
chr7_132986998_132988170_Ctbp2	2.33972	KO	839	0.760794	0.239206	0.690637	iclipFeatures
chr11_101285951_101288954_Becn1	2.33931	KO	840	0.743397	0.256603	0.704416	iclipFeatures
chr11_23646478_23649291_Pex13	2.33914	KO	841	0.578986	0.421014	0.69158	iclipFeatures
chr10_78170907_78171959_Pwp2	2.33858	KO	842	0.629152	0.370848	0.688241	iclipFeatures
chr18_49696144_49698329_Dtwd2	2.33507	KO	843	0.589259	0.410741	0.687938	iclipFeatures
chr1_36792188_36792920_Tmem131	2.33399	KO	844	0.713056	0.286944	0.671184	iclipFeatures
chr10_95547005_95549356_Nudt4	2.33077	KO	845	0.758638	0.241362	0.623053	iclipFeatures
chr7_139578353_139579652_Inpp5a	2.33023	KO	846	0.623085	0.376915	0.640561	iclipFeatures
chr1_143598799_143608520_Cdc73	2.32835	KO	847	0.725244	0.274756	0.643504	iclipFeatures
chr6_113388776_113390448_Arpc4	2.32783	KO	848	0.757771	0.242229	0.650345	iclipFeatures
chr8_26021420_26032023_Hook3	2.32566	KO	849	0.593254	0.406746	0.622674	iclipFeatures
chr5_143931159_143933968_Pms2	2.32335	KO	850	0.26208	0.73792	0.572816	iclipFeatures
chr9_85687359_85688382_Ibtk	2.3227	KO	851	0.754076	0.245924	0.536513	iclipFeatures
chr8_11833092_11835219_Arhgef7	2.32242	KO	852	0.658575	0.341425	0.523721	iclipFeatures
chr10_81044069_81045003_Sgta	2.32225	KO	853	0.657668	0.342332	0.49815	iclipFeatures
chr17_25838456_25839367_Rhot2	2.3222	KO	854	0.436347	0.563653	0.514527	iclipFeatures
chr4_11615545_11615808_Rad54b	2.3219	KO	855	0.260057	0.739943	0.514325	iclipFeatures
chr12_56328305_56328694_Mbip	2.32169	KO	856	0.260057	0.739943	0.485326	iclipFeatures
chr18_46932628_46934223_Arl14epl	2.32141	KO	857	0.597324	0.402676	0.475159	iclipFeatures
chr5_113937093_113942468_Ssh1	2.32124	KO	858	0.50206	0.49794	0.439545	iclipFeatures
chr4_134525549_134526406_Mtfr1l	2.32084	KO	859	0.75703	0.24297	0.452412	iclipFeatures
chr17_56175743_56176923_Mydgf	2.31464	KO	860	0.260057	0.739943	0.493869	iclipFeatures
chr3_88410493_88412892_Slc25a44	2.31403	KO	861	0.464082	0.535918	0.543801	iclipFeatures
chr7_144476754_144477989_Ppfia1	2.31262	KO	862	0.556908	0.443092	0.510074	iclipFeatures
chr19_5369999_5371511_Eif1ad	2.31238	KO	863	0.301528	0.698472	0.535948	iclipFeatures
chr9_57748495_57752499_Edc3	2.31194	KO	864	0.56502	0.43498	0.536182	iclipFeatures
chr16_17651207_17652199_Med15	2.31091	KO	865	0.674626	0.325374	0.586013	iclipFeatures
chr4_141677548_141685631_Ddi2	2.30914	KO	866	0.759376	0.240624	0.597504	iclipFeatures
chr10_75895319_75895941_Derl3	2.30899	KO	867	0.260057	0.739943	0.608668	iclipFeatures
chr15_12349792_12351271_Golph3	2.30538	KO	868	0.760794	0.239206	0.649233	iclipFeatures
chr9_43804016_43807461_Nectin1	2.30314	KO	869	0.759376	0.240624	0.650548	iclipFeatures
chr14_122158517_122159604_Tm9sf2	2.30216	KO	870	0.758368	0.241632	0.634518	iclipFeatures
chr5_145147827_145148078_Bud31	2.30212	KO	871	0.578986	0.421014	0.595675	iclipFeatures
chr12_69803749_69805272_Map4k5	2.30141	KO	872	0.668554	0.331446	0.614695	iclipFeatures
chr12_21323508_21325275_Adam17	2.30047	KO	873	0.707171	0.292829	0.605276	iclipFeatures
chr18_37640490_37642486_Taf7	2.3003	KO	874	0.578175	0.421825	0.604841	iclipFeatures
chr7_19394444_19395694_Ercc2	2.29833	KO	875	0.514322	0.485678	0.585933	iclipFeatures
chr11_113698170_113698666_Cpsf4l	2.29764	KO	876	0.370943	0.629057	0.583159	iclipFeatures
chr13_100617163_100617643_Rad17	2.29741	KO	877	0.450257	0.549743	0.567737	iclipFeatures
chr1_78706415_78707743_Acsl3	2.29412	KO	878	0.666609	0.333391	0.566745	iclipFeatures
chr1_135382311_135385406_Ipo9	2.29368	KO	879	0.755021	0.244979	0.578364	iclipFeatures
chr9_61917277_61917663_Kif23	2.29261	KO	880	0.569296	0.430704	0.570567	iclipFeatures
chr11_43446059_43447981_Slu7	2.29214	KO	881	0.551246	0.448754	0.603238	iclipFeatures
chr1_53308962_53310309_Ormdl1	2.29212	KO	882	0.514328	0.485672	0.601847	iclipFeatures
chr10_40287457_40289328_Amd1	2.29104	KO	883	0.697257	0.302743	0.561191	iclipFeatures
chr3_57644348_57646678_Commd2	2.29067	KO	884	0.694364	0.305636	0.511695	iclipFeatures
chr9_73013366_73013938_Ccpg1	2.28979	KO	885	0.436347	0.563653	0.530821	iclipFeatures
chr12_108815655_108816632_Yy1	2.28898	KO	886	0.697652	0.302348	0.519331	iclipFeatures
chr7_25228257_25228853_Gsk3a	2.28635	KO	887	0.436347	0.563653	0.493904	iclipFeatures
chr11_57809964_57810615_Sap30l	2.28593	KO	888	0.260057	0.739943	0.500257	iclipFeatures
chr17_25260510_25262427_Ube2i	2.28504	KO	889	0.260057	0.739943	0.5069	iclipFeatures
chr3_97921270_97923276_Sec22b	2.28488	KO	890	0.760554	0.239446	0.539345	iclipFeatures
chrX_104077433_104083851_C77370	2.28487	KO	891	0.436347	0.563653	0.538275	iclipFeatures
chr14_59347406_59349167_Phf11d	2.28469	KO	892	0.260057	0.739943	0.560407	iclipFeatures
chr11_72451299_72451768_Mybbp1a	2.28289	KO	893	0.760794	0.239206	0.60056	iclipFeatures
chr8_69907068_69909843_Gatad2a	2.27978	KO	894	0.760794	0.239206	0.640321	iclipFeatures
chr5_3520791_3531008_Cdk6	2.27976	KO	895	0.760794	0.239206	0.618737	iclipFeatures
chr10_122992060_122995669_Mon2	2.27959	KO	896	0.686953	0.313047	0.650048	iclipFeatures
chr8_94673118_94674457_Arl2bp	2.27869	KO	897	0.657668	0.342332	0.650048	iclipFeatures
chr8_72222145_72224418_Fam32a	2.27865	KO	898	0.66158	0.33842	0.648191	iclipFeatures
chr5_130245730_130246389_Sbds	2.2763	KO	899	0.657668	0.342332	0.641655	iclipFeatures
chr10_42700538_42702462_Ostm1	2.27622	KO	900	0.54472	0.45528	0.591581	iclipFeatures
chr18_57944051_57946821_Slc12a2	2.27416	KO	901	0.749448	0.250552	0.598965	iclipFeatures
chr4_145624266_145625345_Gm13212	2.2739	KO	902	0.260057	0.739943	0.609278	iclipFeatures
chr5_117378102_117379809_Rfc5	2.27241	KO	903	0.742227	0.257773	0.583156	iclipFeatures
chr13_112867771_112868029_Skiv2l2	2.27204	KO	904	0.695435	0.304565	0.587118	iclipFeatures
chr10_93961521_93973520_Vezt	2.27007	KO	905	0.260057	0.739943	0.559166	iclipFeatures
chr9_44636488_44640731_Ddx6	2.26996	KO	906	0.760794	0.239206	0.542921	iclipFeatures
chr10_62804568_62812531_Tet1	2.26927	KO	907	0.760794	0.239206	0.542998	iclipFeatures
chr9_110084318_110084616_Dhx30	2.26914	KO	908	0.400361	0.599639	0.529145	iclipFeatures
chr1_150449677_150449935_Tpr	2.26908	KO	909	0.697288	0.302712	0.529145	iclipFeatures
chr13_104837548_104839274_Srek1ip1	2.26849	KO	910	0.265201	0.734799	0.559188	iclipFeatures
chr11_88990742_88991614_Coil	2.2664	KO	911	0.586993	0.413007	0.511182	iclipFeatures
chr2_143985852_143986161_Rrbp1	2.26519	KO	912	0.260833	0.739167	0.496928	iclipFeatures
chr5_148504630_148506228_Ubl3	2.26519	KO	913	0.603697	0.396303	0.516831	iclipFeatures
chr10_40287464_40289328_Amd2	2.26413	KO	914	0.695435	0.304565	0.506827	iclipFeatures
chr11_86498870_86502724_Rps6kb1	2.26284	KO	915	0.56048	0.43952	0.530252	iclipFeatures
chr7_3660826_3661202_Cnot3	2.26226	KO	916	0.280739	0.719261	0.528474	iclipFeatures
chr14_45376333_45378411_Gnpnat1	2.26164	KO	917	0.618252	0.381748	0.528396	iclipFeatures
chr16_20331301_20332603_Abcc5	2.2615	KO	918	0.599394	0.400606	0.543891	iclipFeatures
chr2_23115605_23118434_Mastl	2.26078	KO	919	0.597247	0.402753	0.512029	iclipFeatures
chr15_73577423_73581764_Slc45a4	2.26042	KO	920	0.499449	0.500551	0.481987	iclipFeatures
chr8_126947171_126949274_Rbm34	2.25774	KO	921	0.569215	0.430785	0.5189	iclipFeatures
chr7_118732457_118737024_Ccp110	2.25744	KO	922	0.260057	0.739943	0.519511	iclipFeatures
chr4_129643978_129647991_Kpna6	2.25601	KO	923	0.758638	0.241362	0.485655	iclipFeatures
chr5_134357655_134358822_Gtf2ird1	2.25571	KO	924	0.376823	0.623177	0.50201	iclipFeatures
chr3_89854714_89858846_She	2.25354	KO	925	0.260057	0.739943	0.496658	iclipFeatures
chr17_65841020_65841926_Ppp4r1	2.2535	KO	926	0.649873	0.350127	0.481341	iclipFeatures
chr7_97685987_97692782_Rsf1	2.2534	KO	927	0.62436	0.37564	0.531199	iclipFeatures
chr17_34838911_34839233_Dxo	2.25209	KO	928	0.260833	0.739167	0.511766	iclipFeatures
chr2_117177949_117182279_Spred1	2.25187	KO	929	0.760794	0.239206	0.522885	iclipFeatures
chr14_79459936_79461998_Wbp4	2.25049	KO	930	0.445935	0.554065	0.544956	iclipFeatures
chr8_46578319_46580007_Cenpu	2.25044	KO	931	0.416038	0.583962	0.555484	iclipFeatures
chr2_69750363_69754059_Ppig	2.25034	KO	932	0.758638	0.241362	0.562959	iclipFeatures
chr10_57515773_57517156_Serinc1	2.25033	KO	933	0.564305	0.435695	0.611681	iclipFeatures
chr17_35864792_35865402_Nrm	2.24937	KO	934	0.488021	0.511979	0.580867	iclipFeatures
chr8_110719969_110720400_Vac14	2.24693	KO	935	0.480762	0.519238	0.565559	iclipFeatures
chr8_18881719_18891361_Agpat5	2.24559	KO	936	0.755156	0.244844	0.599819	iclipFeatures
chr5_52866484_52867797_Anapc4	2.24526	KO	937	0.699103	0.300897	0.563356	iclipFeatures
chr5_124460698_124462311_Kmt5a	2.24526	KO	938	0.748058	0.251942	0.582495	iclipFeatures
chr6_124704369_124704633_Emg1	2.24432	KO	939	0.452653	0.547347	0.601406	iclipFeatures
chr1_36422064_36424360_Lman2l	2.24405	KO	940	0.292858	0.707142	0.579336	iclipFeatures
chr5_100033576_100036124_Hnrnpdl	2.24194	KO	941	0.758638	0.241362	0.569039	iclipFeatures
chr7_107210658_107210925_Rbmxl2	2.24016	KO	942	0.394001	0.605999	0.563693	iclipFeatures
chr5_76208586_76209245_Tmem165	2.23888	KO	943	0.755698	0.244302	0.564967	iclipFeatures
chr5_125454433_125460885_Bri3bp	2.23808	KO	944	0.677136	0.322864	0.57052	iclipFeatures
chr1_165328697_165329938_Dcaf6	2.23742	KO	945	0.260057	0.739943	0.610038	iclipFeatures
chr16_4940195_4941028_Nudt16l1	2.23742	KO	946	0.652185	0.347815	0.596482	iclipFeatures
chr2_29843171_29845002_Urm1	2.23611	KO	947	0.645649	0.354351	0.632785	iclipFeatures
chr11_52121974_52127778_Ppp2ca	2.23491	KO	948	0.760794	0.239206	0.631447	iclipFeatures
chr5_21756897_21757153_Pmpcb	2.23425	KO	949	0.508181	0.491819	0.601464	iclipFeatures
chr12_106074926_106077410_Vrk1	2.23174	KO	950	0.688039	0.311961	0.650866	iclipFeatures
chr1_131285250_131289356_Srgap2	2.22859	KO	951	0.623085	0.376915	0.647956	iclipFeatures
chr1_151818713_151822328_Edem3	2.22852	KO	952	0.75703	0.24297	0.642716	iclipFeatures
chr8_123204260_123205724_Chmp1a	2.22705	KO	953	0.742318	0.257682	0.615508	iclipFeatures
chr2_130706199_130709199_4930402H24Rik	2.22492	KO	954	0.3773	0.6227	0.634419	iclipFeatures
chr9_44391050_44392369_Hyou1	2.22253	KO	955	0.754076	0.245924	0.640045	iclipFeatures
chr6_83109673_83109939_Mrpl53	2.22102	KO	956	0.623085	0.376915	0.614831	iclipFeatures
chr1_82751530_82752394_Mff	2.22077	KO	957	0.593254	0.406746	0.588131	iclipFeatures
chr8_13781631_13781938_Cdc16	2.22077	KO	958	0.488714	0.511286	0.573546	iclipFeatures
chr18_69683076_69689079_Tcf4	2.21969	KO	959	0.697288	0.302712	0.611124	iclipFeatures
chr11_106197407_106200935_Ccdc47	2.21866	KO	960	0.744299	0.255701	0.60535	iclipFeatures
chr8_79775162_79779059_Anapc10	2.21822	KO	961	0.370943	0.629057	0.585628	iclipFeatures
chr13_93402089_93405129_Homer1	2.21783	KO	962	0.490034	0.509966	0.591606	iclipFeatures
chr12_4879031_4880581_Ubxn2a	2.21673	KO	963	0.596469	0.403531	0.612363	iclipFeatures
chr16_4081327_4084297_Crebbp	2.21619	KO	964	0.753076	0.246924	0.618714	iclipFeatures
chr3_90487619_90488379_Ilf2	2.21534	KO	965	0.69634	0.30366	0.604174	iclipFeatures
chr15_82041335_82042252_Snu13	2.21493	KO	966	0.425863	0.574137	0.593085	iclipFeatures
chr2_34674593_34678036_Gapvd1	2.21397	KO	967	0.653032	0.346968	0.577768	iclipFeatures
chr7_66074336_66074587_Snrpa1	2.2138	KO	968	0.696288	0.303712	0.573803	iclipFeatures
chr9_45962858_45968758_Pafah1b2	2.21359	KO	969	0.760794	0.239206	0.562655	iclipFeatures
chr9_13807782_13808606_Cep57	2.21335	KO	970	0.598901	0.401099	0.568885	iclipFeatures
chr17_32924687_32924950_Cyp4f13	2.21221	KO	971	0.260057	0.739943	0.552304	iclipFeatures
chr13_95021825_95023316_Wdr41	2.21209	KO	972	0.336865	0.663135	0.562383	iclipFeatures
chr7_130764319_130764785_Tacc2	2.21133	KO	973	0.556815	0.443185	0.518926	iclipFeatures
chr19_45005013_45005698_Mrpl43	2.21126	KO	974	0.641592	0.358408	0.518416	iclipFeatures
chr14_27480697_27483554_Fam208a	2.21021	KO	975	0.758638	0.241362	0.52807	iclipFeatures
chr11_62138071_62141726_Specc1	2.20989	KO	976	0.260057	0.739943	0.571705	iclipFeatures
chr5_65261849_65263062_Rfc1	2.20912	KO	977	0.753824	0.246176	0.61234	iclipFeatures
chr5_75932826_75934422_Kdr	2.20666	KO	978	0.261718	0.738282	0.582665	iclipFeatures
chr15_84939757_84942963_Nup50	2.20666	KO	979	0.755698	0.244302	0.544511	iclipFeatures
chr1_87942472_87945180_Dgkd	2.20599	KO	980	0.695435	0.304565	0.544727	iclipFeatures
chr18_34336232_34336599_Srp19	2.20567	KO	981	0.696405	0.303595	0.584927	iclipFeatures
chr12_51743718_51744520_Hectd1	2.205	KO	982	0.743222	0.256778	0.559865	iclipFeatures
chrX_140808306_140809707_Tex13	2.2032	KO	983	0.260057	0.739943	0.591073	iclipFeatures
chrX_140808306_140809707_Tex13b	2.2032	KO	984	0.260057	0.739943	0.591582	iclipFeatures
chr13_54679398_54681748_Rnf44	2.2029	KO	985	0.760794	0.239206	0.571031	iclipFeatures
chr12_99194979_99196266_Foxn3	2.20223	KO	986	0.662061	0.337939	0.57102	iclipFeatures
chr14_54267857_54269169_Abhd4	2.19969	KO	987	0.503206	0.496794	0.5724	iclipFeatures
chr18_34598614_34600181_Brd8	2.19705	KO	988	0.573793	0.426207	0.572848	iclipFeatures
chr2_153686399_153687730_Dnmt3b	2.1946	KO	989	0.760794	0.239206	0.622971	iclipFeatures
chr2_19394355_19394976_Msrb2	2.19145	KO	990	0.489925	0.510075	0.622971	iclipFeatures
chr11_3244089_3244588_Eif4enif1	2.19132	KO	991	0.696288	0.303712	0.632844	iclipFeatures
chr11_44454570_44455587_Ublcp1	2.19082	KO	992	0.75703	0.24297	0.658387	iclipFeatures
chr1_133699456_133706996_Atp2b4	2.1907	KO	993	0.26453	0.73547	0.66423	iclipFeatures
chr8_8665074_8667251_Arglu1	2.18913	KO	994	0.761287	0.238713	0.663721	iclipFeatures
chr9_7931998_7934496_Yap1	2.1891	KO	995	0.760794	0.239206	0.673049	iclipFeatures
chr11_98992942_98993413_Top2a	2.18842	KO	996	0.760794	0.239206	0.647154	iclipFeatures
chr18_42338475_42341542_Rbm27	2.18578	KO	997	0.758638	0.241362	0.600294	iclipFeatures
chr4_142139239_142141779_Kazn	2.18529	KO	998	0.632223	0.367777	0.622494	iclipFeatures
chr14_66309336_66311424_Trim35	2.18478	KO	999	0.755698	0.244302	0.583459	iclipFeatures
chr1_7169882_7173628_Pcmtd1	2.1838	KO	1000	0.583203	0.416797	0.583459	iclipFeatures
chr5_66686928_66687234_Uchl1	2.18227	KO	1001	0.437339	0.562661	0.544474	iclipFeatures
chr7_127015050_127015269_Gm42742	2.18096	KO	1002	0.288434	0.711566	0.494616	iclipFeatures
chr2_52691663_52694831_Stam2	2.1801	KO	1003	0.486529	0.513471	0.507258	iclipFeatures
chr15_98877759_98878204_Rhebl1	2.17989	KO	1004	0.370943	0.629057	0.507552	iclipFeatures
chr5_4080673_4083124_Cyp51	2.17884	KO	1005	0.760794	0.239206	0.525384	iclipFeatures
chr5_31252947_31253202_Krtcap3	2.17883	KO	1006	0.370943	0.629057	0.55773	iclipFeatures
chr11_95380959_95381872_Fam117a	2.17813	KO	1007	0.260057	0.739943	0.605039	iclipFeatures
chr11_96047430_96050243_Ube2z	2.17267	KO	1008	0.758638	0.241362	0.590163	iclipFeatures
chr6_143203456_143208547_Etnk1	2.17227	KO	1009	0.758638	0.241362	0.593104	iclipFeatures
chr19_44394449_44398018_Scd1	2.17173	KO	1010	0.761527	0.238473	0.562459	iclipFeatures
chr17_28746338_28748406_Mapk14	2.17161	KO	1011	0.760794	0.239206	0.591522	iclipFeatures
chr8_47550685_47552837_Rwdd4a	2.1712	KO	1012	0.761527	0.238473	0.631456	iclipFeatures
chr4_87769924_87774014_Mllt3	2.17045	KO	1013	0.337766	0.662234	0.631456	iclipFeatures
chr7_30321405_30321972_Sdhaf1	2.17026	KO	1014	0.400361	0.599639	0.624288	iclipFeatures
chr1_133106158_133108688_Pik3c2b	2.16953	KO	1015	0.454337	0.545663	0.624214	iclipFeatures
chr5_104503688_104505819_Pkd2	2.16845	KO	1016	0.66158	0.33842	0.623244	iclipFeatures
chr16_31251536_31254884_Ppp1r2	2.16823	KO	1017	0.659394	0.340606	0.594535	iclipFeatures
chr1_132503792_132505665_Rbbp5	2.16798	KO	1018	0.758638	0.241362	0.627049	iclipFeatures
chr17_8194545_8196804_Fgfr1op	2.16792	KO	1019	0.686953	0.313047	0.636537	iclipFeatures
chr19_8831535_8834142_Hnrnpul2	2.1659	KO	1020	0.760794	0.239206	0.640439	iclipFeatures
chr5_125516353_125517412_Aacs	2.16459	KO	1021	0.75109	0.24891	0.617915	iclipFeatures
chr1_183276341_183278351_Brox	2.16429	KO	1022	0.474437	0.525563	0.621605	iclipFeatures
chr4_155618749_155623340_Slc35e2	2.16326	KO	1023	0.662903	0.337097	0.571747	iclipFeatures
chr1_60330992_60338328_Nbeal1	2.16277	KO	1024	0.495241	0.504759	0.579204	iclipFeatures
chr7_25293535_25294159_Cic	2.16245	KO	1025	0.493356	0.506644	0.578988	iclipFeatures
chr11_60857863_60860195_Dhrs7b	2.15895	KO	1026	0.436347	0.563653	0.550608	iclipFeatures
chr19_4285998_4287288_Adrbk1	2.15818	KO	1027	0.696288	0.303712	0.569242	iclipFeatures
chr10_83600032_83600906_Appl2	2.15608	KO	1028	0.260057	0.739943	0.560245	iclipFeatures
chr5_65605720_65610195_Pds5a	2.15528	KO	1029	0.761527	0.238473	0.586365	iclipFeatures
chr5_88659232_88660459_Grsf1	2.1547	KO	1030	0.758638	0.241362	0.606759	iclipFeatures
chr17_21027142_21028856_Zfp160	2.15423	KO	1031	0.46729	0.53271	0.623494	iclipFeatures
chr6_72626370_72627359_Tcf7l1	2.15299	KO	1032	0.660773	0.339227	0.579948	iclipFeatures
chr4_138206017_138208508_Eif4g3	2.15044	KO	1033	0.572937	0.427063	0.628792	iclipFeatures
chr19_37221506_37224457_March5	2.15013	KO	1034	0.756441	0.243559	0.628342	iclipFeatures
chr5_31480257_31481754_Zfp512	2.14944	KO	1035	0.697288	0.302712	0.600284	iclipFeatures
chr5_33897915_33898724_Nelfa	2.14671	KO	1036	0.603697	0.396303	0.613209	iclipFeatures
chr15_76626001_76626487_Tonsl	2.1466	KO	1037	0.260833	0.739167	0.616675	iclipFeatures
chr2_129827773_129832287_Stk35	2.14595	KO	1038	0.748498	0.251502	0.615593	iclipFeatures
chr11_98250389_98253541_Cdk12	2.14569	KO	1039	0.75703	0.24297	0.609578	iclipFeatures
chr19_45552274_45553249_Poll	2.14213	KO	1040	0.478054	0.521946	0.596351	iclipFeatures
chr19_44034942_44036926_Erlin1	2.14161	KO	1041	0.596538	0.403462	0.583425	iclipFeatures
chr14_21793050_21798725_Samd8	2.1402	KO	1042	0.695435	0.304565	0.623686	iclipFeatures
chr5_33600346_33607394_Fam53a	2.13765	KO	1043	0.562119	0.437881	0.579799	iclipFeatures
chr11_115584253_115585729_Gga3	2.13763	KO	1044	0.696288	0.303712	0.551226	iclipFeatures
chr3_95295731_95296166_Fam63a	2.13683	KO	1045	0.56502	0.43498	0.559804	iclipFeatures
chr4_125109307_125113238_Meaf6	2.13559	KO	1046	0.474437	0.525563	0.57642	iclipFeatures
chr1_156065458_156068861_Tor1aip2	2.13491	KO	1047	0.663436	0.336564	0.565522	iclipFeatures
chrX_134084231_134086823_Cstf2	2.1348	KO	1048	0.309634	0.690366	0.570173	iclipFeatures
chr16_43861406_43863069_Qtrtd1	2.13371	KO	1049	0.471295	0.528705	0.571729	iclipFeatures
chr2_173015369_173015739_Rae1	2.13299	KO	1050	0.563834	0.436166	0.554627	iclipFeatures
chr5_34351380_34353445_Rnf4	2.13226	KO	1051	0.762697	0.237303	0.576619	iclipFeatures
chr2_164772562_164772907_Ube2c	2.13155	KO	1052	0.58646	0.41354	0.586355	iclipFeatures
chr4_106438839_106441327_Usp24	2.12861	KO	1053	0.608629	0.391371	0.631544	iclipFeatures
chr18_80212155_80212741_Gm16286	2.12668	KO	1054	0.711844	0.288156	0.610509	iclipFeatures
chr9_92271521_92272561_Plscr1	2.12577	KO	1055	0.394001	0.605999	0.582886	iclipFeatures
chr10_7821203_7823135_Ppil4	2.12547	KO	1056	0.694364	0.305636	0.555933	iclipFeatures
chr15_73095843_73106907_Ago2	2.12486	KO	1057	0.760794	0.239206	0.556418	iclipFeatures
chr6_145216536_145220724_Kras	2.12443	KO	1058	0.761527	0.238473	0.567687	iclipFeatures
chr5_30876790_30879180_Tmem214	2.12329	KO	1059	0.26094	0.73906	0.522509	iclipFeatures
chr7_127015032_127015315_Pagr1a	2.12293	KO	1060	0.287607	0.712393	0.509629	iclipFeatures
chr11_103983749_103985350_Arf2	2.12243	KO	1061	0.493168	0.506832	0.5156	iclipFeatures
chr17_31494321_31496737_Wdr4	2.12123	KO	1062	0.591311	0.408689	0.496715	iclipFeatures
chr18_80211412_80212733_Txnl4a	2.12041	KO	1063	0.721318	0.278682	0.446646	iclipFeatures
chr8_129283442_129286570_Gm32856	2.11694	KO	1064	0.260057	0.739943	0.496236	iclipFeatures
chr18_25477619_25479711_Celf4	2.11645	KO	1065	0.265201	0.734799	0.537289	iclipFeatures
chr5_115645761_115647736_Rab35	2.11539	KO	1066	0.754076	0.245924	0.546293	iclipFeatures
chr11_94339656_94341847_Ankrd40	2.11487	KO	1067	0.571951	0.428049	0.550037	iclipFeatures
chrX_56506988_56507843_Ints6l	2.11469	KO	1068	0.260833	0.739167	0.534118	iclipFeatures
chr5_53653620_53657445_Rbpj	2.11304	KO	1069	0.756841	0.243159	0.55347	iclipFeatures
chr13_101680562_101684879_Pik3r1	2.11287	KO	1070	0.698138	0.301862	0.592399	iclipFeatures
chrX_152609508_152612527_Shroom2	2.11286	KO	1071	0.583203	0.416797	0.573203	iclipFeatures
chrX_12654878_12656514_1810030O07Rik	2.11263	KO	1072	0.628756	0.371244	0.591416	iclipFeatures
chr5_110254416_110256651_Ankle2	2.11255	KO	1073	0.562119	0.437881	0.641485	iclipFeatures
chr2_32787601_32789637_Stxbp1	2.11141	KO	1074	0.453583	0.546417	0.631568	iclipFeatures
chr17_45600966_45601416_Gm7325	2.11078	KO	1075	0.654489	0.345511	0.600182	iclipFeatures
chr14_60218077_60218327_Nupl1	2.11068	KO	1076	0.562119	0.437881	0.592543	iclipFeatures
chr1_63592656_63596276_Adam23	2.11023	KO	1077	0.754076	0.245924	0.555673	iclipFeatures
chr5_67392146_67400025_Bend4	2.10988	KO	1078	0.761527	0.238473	0.575325	iclipFeatures
chr14_69716978_69718247_Chmp7	2.10974	KO	1079	0.657668	0.342332	0.589844	iclipFeatures
chr1_63752215_63754655_Fastkd2	2.10949	KO	1080	0.384279	0.615721	0.550849	iclipFeatures
chr16_19770163_19772753_B3gnt5	2.10944	KO	1081	0.506814	0.493186	0.570716	iclipFeatures
chr19_45817362_45817612_9130011E15Rik	2.10925	KO	1082	0.260057	0.739943	0.521314	iclipFeatures
chr5_28413616_28419242_Rbm33	2.10903	KO	1083	0.758638	0.241362	0.474144	iclipFeatures
chr8_79338394_79339648_Smad1	2.10591	KO	1084	0.598777	0.401223	0.445566	iclipFeatures
chr11_120780744_120781821_Rfng	2.10559	KO	1085	0.26453	0.73547	0.476681	iclipFeatures
chr17_28587647_28590056_Srpk1	2.10359	KO	1086	0.760794	0.239206	0.4948	iclipFeatures
chr10_82648720_82650799_Tdg	2.10267	KO	1087	0.260057	0.739943	0.544438	iclipFeatures
chr12_75714247_75716112_Sgpp1	2.10055	KO	1088	0.289828	0.710172	0.513168	iclipFeatures
chr2_32705781_32707923_Cdk9	2.09987	KO	1089	0.371884	0.628116	0.519907	iclipFeatures
chr1_79781138_79781446_Mrpl44	2.0991	KO	1090	0.695435	0.304565	0.552905	iclipFeatures
chr11_97048335_97049213_Mrpl10	2.09904	KO	1091	0.687996	0.312004	0.502831	iclipFeatures
chr7_118842217_118846010_Knop1	2.09899	KO	1092	0.756441	0.243559	0.502831	iclipFeatures
chr13_24751844_24752103_Gmnn	2.09891	KO	1093	0.445935	0.554065	0.549928	iclipFeatures
chr5_122731169_122736705_Camkk2	2.09831	KO	1094	0.666169	0.333831	0.578897	iclipFeatures
chr14_33377897_33382307_Mapk8	2.09815	KO	1095	0.59451	0.40549	0.552989	iclipFeatures
chr12_69311542_69312002_Nemf	2.09724	KO	1096	0.260057	0.739943	0.510195	iclipFeatures
chr13_51650389_51650662_Cks2	2.09564	KO	1097	0.260057	0.739943	0.460556	iclipFeatures
chr13_48879216_48880795_Fam120a	2.09541	KO	1098	0.760794	0.239206	0.481843	iclipFeatures
chr2_104664919_104665429_Cstf3	2.09508	KO	1099	0.66158	0.33842	0.454829	iclipFeatures
chr7_120945532_120947432_Polr3e	2.09452	KO	1100	0.436347	0.563653	0.42646	iclipFeatures
chr15_99242816_99243133_Mcrs1	2.09283	KO	1101	0.260057	0.739943	0.426741	iclipFeatures
chr15_34143285_34143612_Mtdh	2.09275	KO	1102	0.260057	0.739943	0.475879	iclipFeatures
chr3_19223107_19227635_Pde7a	2.09236	KO	1103	0.658805	0.341195	0.44443	iclipFeatures
chr9_3385596_3391154_Alkbh8	2.09172	KO	1104	0.396023	0.603977	0.422675	iclipFeatures
chr1_180162166_180165603_Cdc42bpa	2.08943	KO	1105	0.310828	0.689172	0.434795	iclipFeatures
chr9_37222613_37224700_Tmem218	2.08915	KO	1106	0.26286	0.73714	0.484653	iclipFeatures
chr9_20907205_20907520_Dnmt1	2.088	KO	1107	0.751442	0.248558	0.504081	iclipFeatures
chr2_20847918_20848711_Arhgap21	2.08759	KO	1108	0.446303	0.553697	0.464487	iclipFeatures
chr17_87035042_87035812_Cript	2.08736	KO	1109	0.444023	0.555977	0.451337	iclipFeatures
chr2_152109192_152111376_Srxn1	2.08641	KO	1110	0.557551	0.442449	0.486515	iclipFeatures
chr12_83681595_83683128_Rbm25	2.08629	KO	1111	0.758638	0.241362	0.536093	iclipFeatures
chr18_9993474_9995484_Thoc1	2.08534	KO	1112	0.454337	0.545663	0.536558	iclipFeatures
chr7_30240137_30240391_Wdr62	2.08411	KO	1113	0.26286	0.73714	0.557899	iclipFeatures
chr18_31909093_31910599_Sft2d3	2.08329	KO	1114	0.26453	0.73547	0.568582	iclipFeatures
chr4_154019876_154021513_Lrrc47	2.08302	KO	1115	0.662605	0.337395	0.562987	iclipFeatures
chr11_95271852_95275873_Kat7	2.08261	KO	1116	0.758638	0.241362	0.556212	iclipFeatures
chr8_80764430_80766328_Gab1	2.08201	KO	1117	0.756099	0.243901	0.584944	iclipFeatures
chr11_107033080_107036583_Bptf	2.07796	KO	1118	0.659711	0.340289	0.603027	iclipFeatures
chr15_81992521_81994751_Desi1	2.07638	KO	1119	0.55085	0.44915	0.615975	iclipFeatures
chr8_13798287_13799193_Upf3a	2.07593	KO	1120	0.501602	0.498398	0.623869	iclipFeatures
chr2_6441742_6446390_Usp6nl	2.07527	KO	1121	0.690887	0.309113	0.624084	iclipFeatures
chr15_58941233_58943429_Mtss1	2.07471	KO	1122	0.74166	0.25834	0.604116	iclipFeatures
chr2_103021056_103022098_Pdhx	2.0735	KO	1123	0.443691	0.556309	0.609335	iclipFeatures
chr7_45825222_45825775_Grwd1	2.0732	KO	1124	0.394001	0.605999	0.580256	iclipFeatures
chr6_66539817_66547220_Mad2l1	2.07128	KO	1125	0.741546	0.258454	0.599532	iclipFeatures
chr18_33199137_33203809_Stard4	2.07118	KO	1126	0.760794	0.239206	0.606596	iclipFeatures
chr13_104201410_104203420_Trim23	2.06997	KO	1127	0.55642	0.44358	0.595469	iclipFeatures
chr8_111448783_111450843_Wdr59	2.06991	KO	1128	0.711898	0.288102	0.616635	iclipFeatures
chr10_62429208_62429628_Supv3l1	2.06927	KO	1129	0.260057	0.739943	0.603241	iclipFeatures
chr11_43729511_43730603_Ttc1	2.06913	KO	1130	0.694364	0.305636	0.567895	iclipFeatures
chr2_30343878_30344266_Nup188	2.06647	KO	1131	0.761527	0.238473	0.551211	iclipFeatures
chr16_32682691_32683493_Tnk2	2.06401	KO	1132	0.630388	0.369612	0.559557	iclipFeatures
chr9_62057247_62060010_Glce	2.06266	KO	1133	0.655359	0.344641	0.532736	iclipFeatures
chr11_84048040_84048616_Dusp14	2.06184	KO	1134	0.260057	0.739943	0.582594	iclipFeatures
chr1_143750789_143757741_Trove2	2.06143	KO	1135	0.38809	0.61191	0.588727	iclipFeatures
chrX_134606257_134607060_Hnrnph2	2.06053	KO	1136	0.593947	0.406053	0.538658	iclipFeatures
chr11_60199083_60199921_Srebf1	2.06	KO	1137	0.639881	0.360119	0.551557	iclipFeatures
chr6_121193511_121196192_Pex26	2.05918	KO	1138	0.443691	0.556309	0.512027	iclipFeatures
chr11_23295978_23298249_Xpo1	2.05896	KO	1139	0.758638	0.241362	0.512027	iclipFeatures
chr11_102684683_102686308_Ccdc43	2.05818	KO	1140	0.755698	0.244302	0.544369	iclipFeatures
chr17_25790499_25790754_Fam173a	2.05793	KO	1141	0.260833	0.739167	0.560544	iclipFeatures
chr8_119508151_119508778_Mbtps1	2.05743	KO	1142	0.759376	0.240624	0.522561	iclipFeatures
chr9_44093861_44095627_Usp2	2.05725	KO	1143	0.260057	0.739943	0.536584	iclipFeatures
chr7_80586626_80589742_Crtc3	2.05716	KO	1144	0.260057	0.739943	0.522624	iclipFeatures
chr2_167298443_167301335_B4galt5	2.0565	KO	1145	0.711511	0.288489	0.523134	iclipFeatures
chr11_72683523_72686481_Ube2g1	2.05609	KO	1146	0.755698	0.244302	0.544289	iclipFeatures
chr17_34823992_34824278_Stk19	2.05531	KO	1147	0.260057	0.739943	0.494357	iclipFeatures
chr3_89415469_89415910_Cks1b	2.05517	KO	1148	0.583914	0.416086	0.494357	iclipFeatures
chr18_32228348_32236751_Map3k2	2.05443	KO	1149	0.619043	0.380957	0.511691	iclipFeatures
chr15_38487429_38490384_Azin1	2.0543	KO	1150	0.760794	0.239206	0.509339	iclipFeatures
chr9_83393415_83395174_Lca5	2.05333	KO	1151	0.472385	0.527615	0.502423	iclipFeatures
chr7_101285320_101289908_Atg16l2	2.05297	KO	1152	0.260057	0.739943	0.510726	iclipFeatures
chr19_8880013_8880524_Uqcc3	2.05169	KO	1153	0.260057	0.739943	0.509529	iclipFeatures
chr19_5664634_5665052_Pcnx3	2.0516	KO	1154	0.433392	0.566608	0.512381	iclipFeatures
chr6_7871257_7875687_C1galt1	2.05119	KO	1155	0.687996	0.312004	0.473396	iclipFeatures
chr14_54368318_54369673_Oxa1l	2.04832	KO	1156	0.686536	0.313464	0.492234	iclipFeatures
chr12_98676740_98678549_Ptpn21	2.04715	KO	1157	0.343081	0.656919	0.506974	iclipFeatures
chr4_136340028_136359447_Hnrnpr	2.0466	KO	1158	0.571951	0.428049	0.557048	iclipFeatures
chr15_99212216_99213214_Spats2	2.04659	KO	1159	0.647559	0.352441	0.573598	iclipFeatures
chr8_116568721_116575128_Cdyl2	2.04615	KO	1160	0.370943	0.629057	0.541893	iclipFeatures
chrX_136168983_136170809_Tceal8	2.04538	KO	1161	0.660773	0.339227	0.54707	iclipFeatures
chr9_20637748_20638376_Fbxl12	2.04488	KO	1162	0.407451	0.592549	0.57507	iclipFeatures
chr11_120805845_120807853_Fasn	2.04297	KO	1163	0.760794	0.239206	0.593955	iclipFeatures
chr14_105114518_105115196_Rbm26	2.04287	KO	1164	0.598901	0.401099	0.593358	iclipFeatures
chr12_4247361_4249750_Ncoa1	2.04265	KO	1165	0.370943	0.629057	0.600157	iclipFeatures
chrX_93746431_93749951_Pcyt1b	2.04227	KO	1166	0.738305	0.261695	0.599846	iclipFeatures
chr2_158074929_158078207_Rprd1b	2.04021	KO	1167	0.623085	0.376915	0.634965	iclipFeatures
chr1_181173225_181177805_Wdr26	2.03959	KO	1168	0.760794	0.239206	0.605079	iclipFeatures
chrX_105968081_105971463_Magt1	2.03893	KO	1169	0.641592	0.358408	0.578875	iclipFeatures
chr1_5162165_5162549_Atp6v1h	2.0387	KO	1170	0.438928	0.561072	0.617088	iclipFeatures
chr3_79062510_79064535_Rapgef2	2.0386	KO	1171	0.657668	0.342332	0.619122	iclipFeatures
chr16_22381308_22383469_Etv5	2.03699	KO	1172	0.758638	0.241362	0.625699	iclipFeatures
chr19_54031276_54033278_Shoc2	2.0364	KO	1173	0.461932	0.538068	0.600539	iclipFeatures
chr12_54892988_54894304_Baz1a	2.03458	KO	1174	0.336865	0.663135	0.610812	iclipFeatures
chr3_96790006_96791155_Rnf115	2.03454	KO	1175	0.753076	0.246924	0.643155	iclipFeatures
chr1_59981727_59985348_Fam117b	2.0336	KO	1176	0.758638	0.241362	0.653336	iclipFeatures
chr14_55097507_55098995_Thtpa	2.03349	KO	1177	0.688861	0.311139	0.651269	iclipFeatures
chr3_106502259_106503624_Cept1	2.03294	KO	1178	0.509188	0.490812	0.638762	iclipFeatures
chr14_78492245_78495775_Akap11	2.02941	KO	1179	0.744323	0.255677	0.681131	iclipFeatures
chr9_44142975_44151444_Cbl	2.02847	KO	1180	0.762358	0.237642	0.631829	iclipFeatures
chr7_121986721_121989690_Gga2	2.02717	KO	1181	0.759477	0.240523	0.602548	iclipFeatures
chr3_138458951_138460384_Metap1	2.02685	KO	1182	0.737972	0.262028	0.599819	iclipFeatures
chr6_137477244_137479015_Eps8	2.02391	KO	1183	0.336865	0.663135	0.606729	iclipFeatures
chr16_30312422_30315810_Atp13a3	2.02363	KO	1184	0.760554	0.239446	0.582858	iclipFeatures
chr18_56955830_56957741_C330018D20Rik	2.02345	KO	1185	0.260057	0.739943	0.532628	iclipFeatures
chr2_157469961_157471862_Src	2.02292	KO	1186	0.465821	0.534179	0.523613	iclipFeatures
chr13_64192544_64196675_Cdc14b	2.02272	KO	1187	0.66158	0.33842	0.51936	iclipFeatures
chr11_69090185_69092384_Vamp2	2.0194	KO	1188	0.578283	0.421717	0.555217	iclipFeatures
chr15_76950388_76950979_1110038F14Rik	2.01849	KO	1189	0.505619	0.494381	0.545319	iclipFeatures
chr9_110425925_110428630_Klhl18	2.01784	KO	1190	0.260057	0.739943	0.59382	iclipFeatures
chr11_8431651_8434493_Tns3	2.01745	KO	1191	0.669326	0.330674	0.623317	iclipFeatures
chr6_146549631_146549945_Asun	2.01706	KO	1192	0.695435	0.304565	0.583165	iclipFeatures
chr6_146549631_146549945_Ints13	2.01706	KO	1193	0.695435	0.304565	0.589986	iclipFeatures
chr18_36798022_36799660_Zmat2	2.01706	KO	1194	0.66158	0.33842	0.615577	iclipFeatures
chr3_69034371_69034623_Smc4	2.0168	KO	1195	0.745065	0.254935	0.644477	iclipFeatures
chr13_35872670_35874064_Cdyl	2.01634	KO	1196	0.760794	0.239206	0.65247	iclipFeatures
chr19_6067841_6068236_Vps51	2.01565	KO	1197	0.260057	0.739943	0.654798	iclipFeatures
chrX_85630554_85634469_Tab3	2.01345	KO	1198	0.646492	0.353508	0.640896	iclipFeatures
chr11_58058765_58062034_Larp1	2.01284	KO	1199	0.761527	0.238473	0.637041	iclipFeatures
chr19_3893407_3894369_Chka	2.01131	KO	1200	0.549057	0.450943	0.605486	iclipFeatures
chr11_115644043_115645768_Grb2	2.01096	KO	1201	0.749256	0.250744	0.605749	iclipFeatures
chr17_24719530_24719780_Snhg9	2.01086	KO	1202	0.718714	0.281286	0.636213	iclipFeatures
chr6_72359711_72360642_Rnf181	2.01052	KO	1203	0.55642	0.44358	0.608658	iclipFeatures
chr2_131197369_131198511_Cdc25b	2.0104	KO	1204	0.623031	0.376969	0.581115	iclipFeatures
chr16_48924227_48925991_Dzip3	2.00894	KO	1205	0.42951	0.57049	0.600653	iclipFeatures
chr4_130389593_130390030_Snrnp40	2.0084	KO	1206	0.763426	0.236574	0.562821	iclipFeatures
chr6_72318675_72319191_Usp39	2.00813	KO	1207	0.564699	0.435301	0.564978	iclipFeatures
chr5_38268978_38269634_Tmem128	2.00582	KO	1208	0.370943	0.629057	0.535341	iclipFeatures
chr7_126292649_126295016_Sbk1	2.00578	KO	1209	0.486093	0.513907	0.548902	iclipFeatures
chr15_100259959_100261248_Atf1	2.00466	KO	1210	0.744432	0.255568	0.564143	iclipFeatures
chr16_11803720_11805356_Cpped1	2.00425	KO	1211	0.370943	0.629057	0.535105	iclipFeatures
chr11_97627388_97628171_E130012A19Rik	2.004	KO	1212	0.740279	0.259721	0.504641	iclipFeatures
chr19_41943696_41944103_Zdhhc16	2.00321	KO	1213	0.260057	0.739943	0.529878	iclipFeatures
chr10_91116573_91117041_Slc25a3	2.00296	KO	1214	0.758638	0.241362	0.507275	iclipFeatures
chr11_116438218_116439077_Ubald2	2.00243	KO	1215	0.58192	0.41808	0.476466	iclipFeatures
chr14_47240943_47241617_Wdhd1	2.00224	KO	1216	0.47305	0.52695	0.515451	iclipFeatures
chr8_70768175_70769057_Pik3r2	2.00202	KO	1217	0.260057	0.739943	0.481832	iclipFeatures
chr3_115938972_115946663_Slc30a7	2.00202	KO	1218	0.623314	0.376686	0.481832	iclipFeatures
chr7_97550307_97550818_Aamdc	2.00194	KO	1219	0.260057	0.739943	0.469574	iclipFeatures
chr11_115268023_115268323_Fdxr	2.0019	KO	1220	0.436347	0.563653	0.487461	iclipFeatures
chr13_55313728_55318325_Nsd1	2.00113	KO	1221	0.760794	0.239206	0.47868	iclipFeatures
chr19_55298295_55298784_Zdhhc6	1.99986	KO	1222	0.404089	0.595911	0.509176	iclipFeatures
chr2_70964560_70965679_Mettl8	1.9995	KO	1223	0.260057	0.739943	0.473016	iclipFeatures
chr8_84246224_84246552_D8Ertd738e	1.99919	KO	1224	0.636056	0.363944	0.473016	iclipFeatures
chr13_51149161_51152562_Spin1	1.99752	KO	1225	0.760794	0.239206	0.455387	iclipFeatures
chr13_55319222_55320149_Rab24	1.99691	KO	1226	0.385233	0.614767	0.455387	iclipFeatures
chr5_110784487_110786171_Ulk1	1.99666	KO	1227	0.56502	0.43498	0.480856	iclipFeatures
chr11_100457122_100457374_Klhl11	1.99565	KO	1228	0.261718	0.738282	0.480934	iclipFeatures
chr8_20268285_20268535_6820431F20Rik	1.99425	KO	1229	0.260057	0.739943	0.443781	iclipFeatures
chr4_11958182_11960572_Pdp1	1.994	KO	1230	0.260057	0.739943	0.44173	iclipFeatures
chr5_92052144_92054780_G3bp2	1.99374	KO	1231	0.760794	0.239206	0.469087	iclipFeatures
chr6_71284756_71285319_Krcc1	1.99256	KO	1232	0.658778	0.341222	0.487729	iclipFeatures
chr16_92111925_92112230_Mrps6	1.99149	KO	1233	0.260833	0.739167	0.535987	iclipFeatures
chr10_75506282_75508877_Gucd1	1.99023	KO	1234	0.26453	0.73547	0.585745	iclipFeatures
chr11_97627378_97628171_Epop	1.98982	KO	1235	0.740279	0.259721	0.585745	iclipFeatures
chr15_76070181_76070436_Puf60	1.98845	KO	1236	0.658805	0.341195	0.585529	iclipFeatures
chr5_23740164_23741973_Pus7	1.98803	KO	1237	0.751442	0.248558	0.594596	iclipFeatures
chr14_31118901_31121592_Pbrm1	1.98764	KO	1238	0.744299	0.255701	0.643458	iclipFeatures
chr1_172000959_172004621_Vangl2	1.98718	KO	1239	0.757629	0.242371	0.665706	iclipFeatures
chr8_94780556_94782427_Cx3cl1	1.98673	KO	1240	0.260057	0.739943	0.625365	iclipFeatures
chr12_100206264_100209824_Calm1	1.9856	KO	1241	0.758638	0.241362	0.621995	iclipFeatures
chr5_150807848_150810690_Pds5b	1.98539	KO	1242	0.749448	0.250552	0.622494	iclipFeatures
chr11_72767645_72772146_Ankfy1	1.98507	KO	1243	0.749448	0.250552	0.623634	iclipFeatures
chr15_10493331_10493695_Rad1	1.98458	KO	1244	0.487014	0.512986	0.623735	iclipFeatures
chr18_33796326_33797341_Epb41l4a	1.98437	KO	1245	0.336865	0.663135	0.673667	iclipFeatures
chr11_113661316_113663309_Fam104a	1.98381	KO	1246	0.625106	0.374894	0.673667	iclipFeatures
chr5_142666972_142670588_Wipi2	1.97977	KO	1247	0.756441	0.243559	0.644867	iclipFeatures
chr18_6201001_6203707_Kif5b	1.97977	KO	1248	0.755698	0.244302	0.646002	iclipFeatures
chr1_84721188_84724617_Trip12	1.97889	KO	1249	0.758638	0.241362	0.64159	iclipFeatures
chr3_51472800_51476507_Naa15	1.97851	KO	1250	0.759376	0.240624	0.665313	iclipFeatures
chr1_46807543_46809952_Slc39a10	1.97828	KO	1251	0.758638	0.241362	0.660212	iclipFeatures
chr2_30097282_30098785_Zer1	1.97811	KO	1252	0.461449	0.538551	0.610573	iclipFeatures
chr13_98839017_98844620_Tnpo1	1.97724	KO	1253	0.760794	0.239206	0.610867	iclipFeatures
chr13_100137380_100137698_Smn1	1.97664	KO	1254	0.442892	0.557108	0.561211	iclipFeatures
chr5_33895177_33897966_Nsd2	1.97616	KO	1255	0.574095	0.425905	0.561426	iclipFeatures
chr5_33895177_33897966_Whsc1	1.97616	KO	1256	0.574095	0.425905	0.511568	iclipFeatures
chr2_28552267_28553082_Ralgds	1.97603	KO	1257	0.260057	0.739943	0.539686	iclipFeatures
chr5_127707024_127709374_Glt1d1	1.97582	KO	1258	0.758638	0.241362	0.529374	iclipFeatures
chr5_148313305_148316065_Mtus2	1.97578	KO	1259	0.26208	0.73792	0.533921	iclipFeatures
chr5_33247722_33250216_Ctbp1	1.97447	KO	1260	0.761527	0.238473	0.552591	iclipFeatures
chr7_122978681_122984392_Rbbp6	1.97428	KO	1261	0.260057	0.739943	0.571045	iclipFeatures
chr1_189640605_189642598_Cenpf	1.97364	KO	1262	0.742628	0.257372	0.571492	iclipFeatures
chr2_120599341_120601255_Snap23	1.97359	KO	1263	0.657668	0.342332	0.554773	iclipFeatures
chr11_11930498_11933462_Grb10	1.97184	KO	1264	0.488363	0.511637	0.555086	iclipFeatures
chr3_103739813_103743947_Hipk1	1.97172	KO	1265	0.760794	0.239206	0.554797	iclipFeatures
chr2_31615652_31617526_Fubp3	1.96995	KO	1266	0.758638	0.241362	0.58047	iclipFeatures
chr11_32516487_32518710_Ubtd2	1.96899	KO	1267	0.26453	0.73547	0.549841	iclipFeatures
chr10_34283420_34285275_Tspyl1	1.96792	KO	1268	0.59145	0.40855	0.535424	iclipFeatures
chr16_43618744_43642602_Zbtb20	1.96782	KO	1269	0.265201	0.734799	0.552355	iclipFeatures
chr10_126996486_126999975_Ctdsp2	1.96747	KO	1270	0.758638	0.241362	0.51964	iclipFeatures
chr11_50255633_50258801_Maml1	1.9668	KO	1271	0.516785	0.483215	0.519855	iclipFeatures
chr8_84639467_84640249_Cacna1a	1.96543	KO	1272	0.436347	0.563653	0.533005	iclipFeatures
chrX_153392868_153396134_Klf8	1.96509	KO	1273	0.513498	0.486502	0.538719	iclipFeatures
chr11_31665149_31665867_Bod1	1.96405	KO	1274	0.657668	0.342332	0.588062	iclipFeatures
chr10_85131699_85132307_Cry1	1.96351	KO	1275	0.433641	0.566359	0.538719	iclipFeatures
chr2_180034297_180035465_Lsm14b	1.96135	KO	1276	0.760794	0.239206	0.536395	iclipFeatures
chrX_139941527_139945736_Rbm41	1.96123	KO	1277	0.396023	0.603977	0.519214	iclipFeatures
chr1_156678531_156681410_Fam20b	1.95987	KO	1278	0.64859	0.35141	0.543943	iclipFeatures
chr8_85537632_85539215_Dnaja2	1.95824	KO	1279	0.758638	0.241362	0.55404	iclipFeatures
chr16_33948752_33949338_Itgb5	1.95616	KO	1280	0.265201	0.734799	0.555045	iclipFeatures
chr7_127197458_127198570_Tbc1d10b	1.95329	KO	1281	0.493553	0.506447	0.535014	iclipFeatures
chr1_192844487_192846372_Sertad4	1.95309	KO	1282	0.26453	0.73547	0.571275	iclipFeatures
chr12_8749671_8752583_Pum2	1.95162	KO	1283	0.760794	0.239206	0.562058	iclipFeatures
chr2_35180204_35183726_Rab14	1.95119	KO	1284	0.758638	0.241362	0.548359	iclipFeatures
chr2_163083294_163084688_Mybl2	1.9496	KO	1285	0.443691	0.556309	0.597146	iclipFeatures
chr16_91870194_91871655_Itsn1	1.94884	KO	1286	0.56048	0.43952	0.573797	iclipFeatures
chr15_81864515_81865802_Phf5a	1.94801	KO	1287	0.758638	0.241362	0.588063	iclipFeatures
chr3_87923183_87923672_Mrpl24	1.94795	KO	1288	0.55642	0.44358	0.587661	iclipFeatures
chr4_126275261_126275883_Trappc3	1.94779	KO	1289	0.621641	0.378359	0.581341	iclipFeatures
chr4_118136956_118138229_Kdm4a	1.94745	KO	1290	0.753076	0.246924	0.562977	iclipFeatures
chr9_122945088_122948075_1110059G10Rik	1.94646	KO	1291	0.260057	0.739943	0.564647	iclipFeatures
chr19_8770573_8772475_Nxf1	1.94522	KO	1292	0.407197	0.592803	0.551341	iclipFeatures
chr10_128557760_128558905_Pa2g4	1.94429	KO	1293	0.756773	0.243227	0.556179	iclipFeatures
chr8_88331058_88332560_Brd7	1.94407	KO	1294	0.695435	0.304565	0.568554	iclipFeatures
chr17_85023695_85023992_Ppm1b	1.94331	KO	1295	0.260057	0.739943	0.567401	iclipFeatures
chr4_118432900_118433151_Cdc20	1.94299	KO	1296	0.577178	0.422822	0.607276	iclipFeatures
chrX_105865545_105867666_Atrx	1.9411	KO	1297	0.62558	0.37442	0.592562	iclipFeatures
chr11_70009592_70010777_Dvl2	1.94094	KO	1298	0.604796	0.395204	0.561755	iclipFeatures
chr7_128439776_128442532_Tial1	1.94052	KO	1299	0.745393	0.254607	0.526133	iclipFeatures
chr11_120379797_120382468_Nploc4	1.9403	KO	1300	0.741546	0.258454	0.552361	iclipFeatures
chr8_61393837_61396072_Sh3rf1	1.93822	KO	1301	0.658805	0.341195	0.520649	iclipFeatures
chr7_19606216_19606552_Relb	1.93813	KO	1302	0.260057	0.739943	0.519652	iclipFeatures
chr3_108678539_108678840_Clcc1	1.93786	KO	1303	0.448706	0.551294	0.499412	iclipFeatures
chr3_95122684_95123051_Vps72	1.93778	KO	1304	0.339212	0.660788	0.475326	iclipFeatures
chr19_11777484_11779173_Stx3	1.93756	KO	1305	0.522338	0.477662	0.477251	iclipFeatures
chr7_35685164_35690780_Dpy19l3	1.93678	KO	1306	0.260057	0.739943	0.487234	iclipFeatures
chr2_115777031_115778768_BC052040	1.93628	KO	1307	0.615613	0.384387	0.487749	iclipFeatures
chr9_63640284_63644588_Aagab	1.9362	KO	1308	0.402394	0.597606	0.471392	iclipFeatures
chr5_45699873_45700547_Ncapg	1.936	KO	1309	0.504532	0.495468	0.504404	iclipFeatures
chr5_77282984_77286432_Rest	1.93463	KO	1310	0.760794	0.239206	0.527737	iclipFeatures
chr6_22306519_22308448_Fam3c	1.93435	KO	1311	0.758638	0.241362	0.577811	iclipFeatures
chr18_74221205_74221491_Cxxc1	1.93304	KO	1312	0.265201	0.734799	0.556489	iclipFeatures
chr8_123231731_123232256_Cdk10	1.93286	KO	1313	0.285145	0.714855	0.582745	iclipFeatures
chr12_86519065_86521628_Esrrb	1.93259	KO	1314	0.669326	0.330674	0.560155	iclipFeatures
chr3_19131401_19134171_Armc1	1.93173	KO	1315	0.75567	0.24433	0.555935	iclipFeatures
chr8_46638148_46639698_Casp3	1.93048	KO	1316	0.760794	0.239206	0.545838	iclipFeatures
chr10_75646109_75646543_Cabin1	1.92927	KO	1317	0.402394	0.597606	0.545323	iclipFeatures
chr4_147611935_147613026_Zfp979	1.92811	KO	1318	0.664961	0.335039	0.550495	iclipFeatures
chr17_24897255_24897529_Nme3	1.92723	KO	1319	0.278626	0.721374	0.559642	iclipFeatures
chr1_134506321_134508774_Rabif	1.92651	KO	1320	0.718594	0.281406	0.550826	iclipFeatures
chr9_106887414_106889040_Manf	1.92582	KO	1321	0.657668	0.342332	0.540994	iclipFeatures
chr12_81996108_82000924_Pcnx	1.92478	KO	1322	0.260057	0.739943	0.537849	iclipFeatures
chr19_37021290_37024859_Cpeb3	1.92406	KO	1323	0.336865	0.663135	0.547433	iclipFeatures
chr3_31050277_31052959_Prkci	1.92381	KO	1324	0.760794	0.239206	0.545576	iclipFeatures
chr17_56067550_56068026_Chaf1a	1.92375	KO	1325	0.667504	0.332496	0.499722	iclipFeatures
chr1_59639432_59640199_Sumo1	1.9227	KO	1326	0.662481	0.337519	0.509552	iclipFeatures
chr9_110898496_110900530_Als2cl	1.9224	KO	1327	0.370943	0.629057	0.539579	iclipFeatures
chr3_88587991_88588419_Ssr2	1.92164	KO	1328	0.760794	0.239206	0.550967	iclipFeatures
chr7_7182998_7183562_Zfp418	1.92119	KO	1329	0.260057	0.739943	0.500894	iclipFeatures
chr16_3979105_3979820_Slx4	1.91968	KO	1330	0.260057	0.739943	0.510081	iclipFeatures
chr4_132777874_132778752_Rpa2	1.91959	KO	1331	0.755974	0.244026	0.469927	iclipFeatures
chr1_52922318_52925441_1700019D03Rik	1.91836	KO	1332	0.560319	0.439681	0.480638	iclipFeatures
chr12_87238866_87239815_Vipas39	1.91734	KO	1333	0.450752	0.549248	0.470439	iclipFeatures
chr3_97689823_97690811_Pde4dip	1.91693	KO	1334	0.260057	0.739943	0.520513	iclipFeatures
chr1_74528854_74530842_Cnot9	1.91683	KO	1335	0.759376	0.240624	0.549695	iclipFeatures
chrX_101297127_101298934_Med12	1.9165	KO	1336	0.26094	0.73906	0.546513	iclipFeatures
chr3_102153582_102158486_Vangl1	1.91545	KO	1337	0.478054	0.521946	0.566184	iclipFeatures
chr1_180907642_180908088_Pycr2	1.91488	KO	1338	0.658805	0.341195	0.570932	iclipFeatures
chr8_72477994_72483765_Slc35e1	1.91422	KO	1339	0.760794	0.239206	0.592279	iclipFeatures
chr17_33742483_33747667_Rab11b	1.91372	KO	1340	0.551881	0.448119	0.590604	iclipFeatures
chr6_72608420_72612104_Tgoln1	1.91321	KO	1341	0.724153	0.275847	0.590516	iclipFeatures
chr11_51975911_51977336_Cdkn2aipnl	1.91305	KO	1342	0.75703	0.24297	0.608477	iclipFeatures
chr12_99954914_99955219_Tdp1	1.91189	KO	1343	0.498226	0.501774	0.594744	iclipFeatures
chr9_102906961_102908307_Ryk	1.91159	KO	1344	0.473527	0.526473	0.594818	iclipFeatures
chr2_126791557_126792825_Trpm7	1.91088	KO	1345	0.742628	0.257372	0.615782	iclipFeatures
chr17_25730778_25731463_Rpusd1	1.91015	KO	1346	0.260057	0.739943	0.618173	iclipFeatures
chr18_76940475_76941614_Ier3ip1	1.90985	KO	1347	0.657668	0.342332	0.592862	iclipFeatures
chr11_90644552_90645977_Cox11	1.90977	KO	1348	0.521479	0.478521	0.578346	iclipFeatures
chr3_32334791_32341483_Zmat3	1.90908	KO	1349	0.761527	0.238473	0.601055	iclipFeatures
chr15_51962603_51964055_Rad21	1.90711	KO	1350	0.761527	0.238473	0.599103	iclipFeatures
chr4_152303204_152307126_Icmt	1.90706	KO	1351	0.748058	0.251942	0.599618	iclipFeatures
chr19_10713234_10714625_Vps37c	1.90663	KO	1352	0.50392	0.49608	0.599154	iclipFeatures
chr14_25663047_25666743_Zmiz1	1.90654	KO	1353	0.353068	0.646932	0.573012	iclipFeatures
chr10_63011733_63018742_Rufy2	1.90652	KO	1354	0.700621	0.299379	0.572723	iclipFeatures
chr1_93818323_93822102_Ing5	1.90559	KO	1355	0.723111	0.276889	0.522576	iclipFeatures
chr14_32102411_32103203_Oxnad1	1.90524	KO	1356	0.265201	0.734799	0.487171	iclipFeatures
chr17_56278961_56279731_Plin3	1.90502	KO	1357	0.653032	0.346968	0.464998	iclipFeatures
chr2_152681290_152685146_H13	1.90457	KO	1358	0.260057	0.739943	0.483734	iclipFeatures
chr4_150619489_150621966_Rere	1.90446	KO	1359	0.758638	0.241362	0.439678	iclipFeatures
chr7_27281409_27282150_Numbl	1.90319	KO	1360	0.260057	0.739943	0.442964	iclipFeatures
chr10_80243643_80245144_Mum1	1.90317	KO	1361	0.394001	0.605999	0.482324	iclipFeatures
chr7_126864868_126865382_Hirip3	1.90305	KO	1362	0.282195	0.717805	0.491966	iclipFeatures
chr1_33739392_33742564_Rab23	1.90295	KO	1363	0.540428	0.459572	0.526741	iclipFeatures
chr11_101434317_101435673_Rundc1	1.90214	KO	1364	0.260057	0.739943	0.496625	iclipFeatures
chr9_32261043_32268446_Arhgap32	1.90191	KO	1365	0.755974	0.244026	0.525754	iclipFeatures
chr14_65817413_65817822_Pbk	1.90026	KO	1366	0.658805	0.341195	0.562218	iclipFeatures
chr16_95979928_95980182_Psmg1	1.90025	KO	1367	0.749448	0.250552	0.603764	iclipFeatures
chr5_34908845_34912534_Htt	1.90021	KO	1368	0.607802	0.392198	0.619769	iclipFeatures
chr4_133266044_133266833_Tmem222	1.90019	KO	1369	0.457482	0.542518	0.630858	iclipFeatures
chr16_48318711_48319723_Dppa2	1.89923	KO	1370	0.551349	0.448651	0.610791	iclipFeatures
chr14_65530445_65531523_Elp3	1.89839	KO	1371	0.758638	0.241362	0.620848	iclipFeatures
chr16_16312227_16313986_Dnm1l	1.89825	KO	1372	0.697652	0.302348	0.620333	iclipFeatures
chr19_14448071_14449733_Tle4	1.89813	KO	1373	0.700485	0.299515	0.588622	iclipFeatures
chr17_30215523_30220372_Btbd9	1.89738	KO	1374	0.370943	0.629057	0.578273	iclipFeatures
chr8_111134894_111137074_Pdpr	1.89608	KO	1375	0.555303	0.444697	0.598708	iclipFeatures
chr16_92391950_92393452_Rcan1	1.89413	KO	1376	0.759376	0.240624	0.596299	iclipFeatures
chr9_96052809_96057806_Xrn1	1.894	KO	1377	0.744299	0.255701	0.596055	iclipFeatures
chr1_151884523_151893393_1700025G04Rik	1.89393	KO	1378	0.290694	0.709306	0.552012	iclipFeatures
chr2_134594184_134598524_Tmx4	1.89386	KO	1379	0.353989	0.646011	0.562362	iclipFeatures
chr4_133679007_133680330_Arid1a	1.89255	KO	1380	0.755698	0.244302	0.582695	iclipFeatures
chr13_30540307_30540730_Uqcrfs1	1.89169	KO	1381	0.734547	0.265453	0.532841	iclipFeatures
chr14_54897282_54898927_Pabpn1	1.89024	KO	1382	0.695218	0.304782	0.533794	iclipFeatures
chr6_145004117_145004287_Bcat1	1.89007	KO	1383	0.260057	0.739943	0.553625	iclipFeatures
chr19_40846098_40848572_Ccnj	1.89	KO	1384	0.474437	0.525563	0.549881	iclipFeatures
chr9_97074960_97079045_Slc25a36	1.88945	KO	1385	0.758638	0.241362	0.518204	iclipFeatures
chr9_108051446_108052801_Gmppb	1.88944	KO	1386	0.260833	0.739167	0.519289	iclipFeatures
chr8_47823958_47828822_Wwc2	1.88918	KO	1387	0.753824	0.246176	0.520836	iclipFeatures
chr6_128373966_128376146_Foxm1	1.8891	KO	1388	0.489008	0.510992	0.566711	iclipFeatures
chr15_85061551_85062830_Fam118a	1.88904	KO	1389	0.316553	0.683447	0.595131	iclipFeatures
chr4_108338479_108341544_Coa7	1.88717	KO	1390	0.438928	0.561072	0.569186	iclipFeatures
chr4_49512595_49514216_Mrpl50	1.88682	KO	1391	0.745393	0.254607	0.618806	iclipFeatures
chr19_10199131_10199935_Fen1	1.8858	KO	1392	0.710683	0.289317	0.617682	iclipFeatures
chr19_29015892_29020237_Cdc37l1	1.88562	KO	1393	0.71881	0.28119	0.605876	iclipFeatures
chr6_72841104_72843121_Kcmf1	1.88555	KO	1394	0.758638	0.241362	0.637336	iclipFeatures
chrX_98944861_98949020_Yipf6	1.88551	KO	1395	0.499193	0.500807	0.642483	iclipFeatures
chr13_44919952_44921643_Jarid2	1.88421	KO	1396	0.75703	0.24297	0.593949	iclipFeatures
chr5_150635971_150643263_N4bp2l2	1.88377	KO	1397	0.742586	0.257414	0.598745	iclipFeatures
chr14_45593170_45595482_Ddhd1	1.88307	KO	1398	0.370943	0.629057	0.55315	iclipFeatures
chr10_83594238_83596469_A230046K03Rik	1.88289	KO	1399	0.631157	0.368843	0.55315	iclipFeatures
chr14_49086327_49087723_Ap5m1	1.88186	KO	1400	0.490396	0.509604	0.562321	iclipFeatures
chr19_33719669_33720778_Lipo2	1.88179	KO	1401	0.260057	0.739943	0.561932	iclipFeatures
chr17_56322502_56323488_Uhrf1	1.8814	KO	1402	0.758638	0.241362	0.54631	iclipFeatures
chr8_22128282_22128684_Nek3	1.88131	KO	1403	0.26286	0.73714	0.575374	iclipFeatures
chr5_92284006_92286822_Sdad1	1.88045	KO	1404	0.758638	0.241362	0.588411	iclipFeatures
chr19_11943352_11945096_Patl1	1.88039	KO	1405	0.590905	0.409095	0.591605	iclipFeatures
chr7_79360156_79365508_Abhd2	1.87986	KO	1406	0.753137	0.246863	0.612168	iclipFeatures
chr19_41862844_41863206_Rrp12	1.87923	KO	1407	0.58637	0.41363	0.592464	iclipFeatures
chr10_99023119_99026143_Atp2b1	1.87889	KO	1408	0.66158	0.33842	0.606821	iclipFeatures
chr15_93489168_93491913_Pphln1	1.87829	KO	1409	0.761527	0.238473	0.606895	iclipFeatures
chr4_116031769_116034311_Nsun4	1.87825	KO	1410	0.522338	0.477662	0.592009	iclipFeatures
chr13_99319647_99320168_Ptcd2	1.87759	KO	1411	0.465683	0.534317	0.546705	iclipFeatures
chr1_86605216_86609375_Cops7b	1.87681	KO	1412	0.561599	0.438401	0.564147	iclipFeatures
chr11_120483474_120483984_Hgs	1.87669	KO	1413	0.406436	0.593564	0.523995	iclipFeatures
chr5_140337658_140338137_Nudt1	1.87598	KO	1414	0.759376	0.240624	0.523922	iclipFeatures
chr17_36948354_36949538_Ppp1r11	1.87566	KO	1415	0.442042	0.557958	0.537248	iclipFeatures
chr2_152687597_152687951_Mcts2	1.87505	KO	1416	0.300098	0.699902	0.560598	iclipFeatures
chr19_45750258_45752143_Mgea5	1.87499	KO	1417	0.760794	0.239206	0.574203	iclipFeatures
chr6_87788852_87792589_Rab43	1.87425	KO	1418	0.260057	0.739943	0.60913	iclipFeatures
chr16_64855880_64859507_Cggbp1	1.87216	KO	1419	0.760794	0.239206	0.5955	iclipFeatures
chr10_117750623_117751005_Nup107	1.87051	KO	1420	0.655601	0.344399	0.588391	iclipFeatures
chr8_94179424_94180329_Mt1	1.87029	KO	1421	0.699186	0.300814	0.597781	iclipFeatures
chr7_16435510_16437696_Zc3h4	1.87018	KO	1422	0.697652	0.302348	0.547707	iclipFeatures
chr11_65688242_65690804_Map2k4	1.86875	KO	1423	0.755698	0.244302	0.597565	iclipFeatures
chr6_31507681_31516811_Mkln1	1.86738	KO	1424	0.623085	0.376915	0.587644	iclipFeatures
chrX_8123300_8125544_Wdr13	1.86669	KO	1425	0.370943	0.629057	0.556603	iclipFeatures
chr9_104046587_104047745_Uba5	1.86588	KO	1426	0.394001	0.605999	0.549399	iclipFeatures
chrX_106124615_106128160_Atp7a	1.86576	KO	1427	0.260057	0.739943	0.535276	iclipFeatures
chr18_46608134_46610225_Eif1a	1.86516	KO	1428	0.758638	0.241362	0.535316	iclipFeatures
chr4_59898967_59904740_Snx30	1.86508	KO	1429	0.66158	0.33842	0.541812	iclipFeatures
chr7_65701653_65701913_Tm2d3	1.86271	KO	1430	0.345192	0.654808	0.574513	iclipFeatures
chr4_108558785_108559421_Zcchc11	1.86092	KO	1431	0.627149	0.372851	0.611456	iclipFeatures
chr6_83986621_83989550_Zfp638	1.85915	KO	1432	0.55642	0.44358	0.660559	iclipFeatures
chr6_54888455_54893500_Znrf2	1.85729	KO	1433	0.756099	0.243901	0.648282	iclipFeatures
chr18_32097149_32104331_Iws1	1.85653	KO	1434	0.688039	0.311961	0.626818	iclipFeatures
chr11_3689103_3690510_Morc2a	1.85571	KO	1435	0.697958	0.302042	0.618304	iclipFeatures
chr7_6703891_6707505_Peg3	1.85512	KO	1436	0.763426	0.236574	0.581595	iclipFeatures
chr14_45348519_45349073_Psmc6	1.85453	KO	1437	0.75109	0.24891	0.554853	iclipFeatures
chr9_65689016_65690301_Oaz2	1.85444	KO	1438	0.63587	0.36413	0.532701	iclipFeatures
chr17_26932032_26932579_Kifc5b	1.85442	KO	1439	0.446931	0.553069	0.489902	iclipFeatures
chr12_71318894_71320107_Dact1	1.85441	KO	1440	0.260057	0.739943	0.480006	iclipFeatures
chr11_32622561_32624595_Stk10	1.85353	KO	1441	0.260057	0.739943	0.458649	iclipFeatures
chr8_119561977_119564038_Hsdl1	1.8535	KO	1442	0.289	0.711	0.458848	iclipFeatures
chr18_80117822_80119640_Pard6g	1.85243	KO	1443	0.534578	0.465422	0.460217	iclipFeatures
chr4_120529259_120530199_Scmh1	1.85123	KO	1444	0.260057	0.739943	0.463343	iclipFeatures
chr9_119924804_119926588_Wdr48	1.84902	KO	1445	0.598991	0.401009	0.513201	iclipFeatures
chrX_169311529_169312823_Hccs	1.84729	KO	1446	0.549864	0.450136	0.531991	iclipFeatures
chr17_32196271_32197751_Brd4	1.84663	KO	1447	0.753076	0.246924	0.578954	iclipFeatures
chr4_8866655_8868449_Chd7	1.84649	KO	1448	0.649557	0.350443	0.554344	iclipFeatures
chrX_36848542_36851099_C330007P06Rik	1.84638	KO	1449	0.478192	0.521808	0.59088	iclipFeatures
chr3_58590694_58593546_Selenot	1.84553	KO	1450	0.758638	0.241362	0.591659	iclipFeatures
chr3_27416157_27419290_Fndc3b	1.84475	KO	1451	0.447953	0.552047	0.574852	iclipFeatures
chr17_32303671_32305256_Akap8	1.84436	KO	1452	0.758638	0.241362	0.525551	iclipFeatures
chr10_43525120_43525401_1700021F05Rik	1.84433	KO	1453	0.288472	0.711528	0.536165	iclipFeatures
chr19_4286000_4287099_Grk2	1.8438	KO	1454	0.625418	0.374582	0.563271	iclipFeatures
chr2_31680570_31681580_Exosc2	1.842	KO	1455	0.60678	0.39322	0.563271	iclipFeatures
chrX_73033980_73035217_Pnma5	1.84057	KO	1456	0.3818	0.6182	0.574118	iclipFeatures
chr17_25844733_25845067_Wdr90	1.84055	KO	1457	0.260057	0.739943	0.572576	iclipFeatures
chr19_37420375_37421859_Kif11	1.8395	KO	1458	0.755698	0.244302	0.613543	iclipFeatures
chr9_53816971_53818161_Slc35f2	1.83941	KO	1459	0.749256	0.250744	0.626571	iclipFeatures
chr2_75926043_75931350_Agps	1.83714	KO	1460	0.758638	0.241362	0.641757	iclipFeatures
chr4_101640573_101642799_Dnajc6	1.83703	KO	1461	0.55642	0.44358	0.67944	iclipFeatures
chr2_11585436_11585732_Rbm17	1.83612	KO	1462	0.743222	0.256778	0.722978	iclipFeatures
chr11_40701387_40702838_Hmmr	1.83586	KO	1463	0.698138	0.301862	0.722917	iclipFeatures
chr11_20021447_20024026_Spred2	1.83536	KO	1464	0.755698	0.244302	0.694084	iclipFeatures
chr6_120766417_120771192_Cecr2	1.83508	KO	1465	0.758638	0.241362	0.655315	iclipFeatures
chr9_54909741_54912534_Ireb2	1.83487	KO	1466	0.758638	0.241362	0.663282	iclipFeatures
chr1_128236758_128237737_R3hdm1	1.83402	KO	1467	0.695435	0.304565	0.614966	iclipFeatures
chr10_71381818_71385885_Ipmk	1.832	KO	1468	0.755082	0.244918	0.600843	iclipFeatures
chr16_91505411_91510522_Ifnar1	1.83161	KO	1469	0.46093	0.53907	0.599613	iclipFeatures
chr11_76250424_76250619_Rnmtl1	1.83126	KO	1470	0.370943	0.629057	0.599613	iclipFeatures
chr10_121410349_121412935_Rassf3	1.8305	KO	1471	0.636095	0.363905	0.580254	iclipFeatures
chr2_119248962_119249527_Spint1	1.82914	KO	1472	0.260057	0.739943	0.586015	iclipFeatures
chr7_30105900_30107622_Zfp260	1.82908	KO	1473	0.556912	0.443088	0.573623	iclipFeatures
chr19_37268740_37270741_Ide	1.828	KO	1474	0.743397	0.256603	0.572031	iclipFeatures
chr5_103989761_103990509_Hsd17b11	1.8273	KO	1475	0.758638	0.241362	0.602511	iclipFeatures
chr8_95719450_95720407_Cnot1	1.82642	KO	1476	0.565052	0.434948	0.601553	iclipFeatures
chr12_79174335_79176144_Rdh11	1.8257	KO	1477	0.753046	0.246954	0.62313	iclipFeatures
chr10_83594238_83596473_Washc4	1.82498	KO	1478	0.631157	0.368843	0.641702	iclipFeatures
chr4_32804027_32806112_Ankrd6	1.82471	KO	1479	0.445018	0.554982	0.643441	iclipFeatures
chr2_158495644_158499253_Ralgapb	1.82435	KO	1480	0.675734	0.324266	0.604672	iclipFeatures
chr5_5537450_5539251_Gtpbp10	1.8226	KO	1481	0.626523	0.373477	0.607257	iclipFeatures
chr15_8289823_8292091_Nipbl	1.82252	KO	1482	0.475822	0.524178	0.607816	iclipFeatures
chr5_86109286_86112649_Uba6	1.82222	KO	1483	0.742628	0.257372	0.570706	iclipFeatures
chr16_11192969_11193479_Rsl1d1	1.82206	KO	1484	0.760794	0.239206	0.601907	iclipFeatures
chrX_160801391_160808304_Cdkl5	1.82205	KO	1485	0.370943	0.629057	0.600101	iclipFeatures
chr2_59354448_59355208_Pkp4	1.82073	KO	1486	0.590905	0.409095	0.563454	iclipFeatures
chr11_68985696_68987962_Pfas	1.8185	KO	1487	0.758638	0.241362	0.591736	iclipFeatures
chr17_33908181_33908431_BC051226	1.8157	KO	1488	0.260057	0.739943	0.584781	iclipFeatures
chr10_71225463_71228707_Tfam	1.81551	KO	1489	0.75703	0.24297	0.556282	iclipFeatures
chr2_24789927_24791949_Ehmt1	1.81482	KO	1490	0.657668	0.342332	0.580464	iclipFeatures
chr9_40804949_40805201_Hspa8	1.81411	KO	1491	0.260057	0.739943	0.547826	iclipFeatures
chr13_113592178_113594608_Snx18	1.81343	KO	1492	0.758638	0.241362	0.53812	iclipFeatures
chr17_88486926_88490533_Foxn2	1.81226	KO	1493	0.673075	0.326925	0.586601	iclipFeatures
chr11_76777207_76782183_Cpd	1.81215	KO	1494	0.475808	0.524192	0.57094	iclipFeatures
chr9_77793251_77794489_Gclc	1.81184	KO	1495	0.612761	0.387239	0.580876	iclipFeatures
chr12_73983897_73984820_Snapc1	1.81169	KO	1496	0.26453	0.73547	0.597935	iclipFeatures
chr1_105753623_105755191_2310035C23Rik	1.81138	KO	1497	0.66158	0.33842	0.550919	iclipFeatures
chr17_14944170_14945939_1600012H06Rik	1.81136	KO	1498	0.744862	0.255138	0.559181	iclipFeatures
chr19_59296083_59299522_Pdzd8	1.81097	KO	1499	0.600422	0.399578	0.548802	iclipFeatures
chr6_54640783_54645839_Plekha8	1.81096	KO	1500	0.75703	0.24297	0.539748	iclipFeatures
chr12_59043091_59043661_Trappc6b	1.81043	KO	1501	0.430648	0.569352	0.539301	iclipFeatures
chr10_128567522_128569617_Erbb3	1.80654	KO	1502	0.288472	0.711528	0.547309	iclipFeatures
chr12_102003221_102005993_Cpsf2	1.80297	KO	1503	0.755698	0.244302	0.498828	iclipFeatures
chr1_156004579_156007035_Tor1aip1	1.80263	KO	1504	0.372013	0.627987	0.499156	iclipFeatures
chr11_70644026_70644765_Slc25a11	1.80079	KO	1505	0.522226	0.477774	0.48861	iclipFeatures
chr12_17791204_17791929_Hpcal1	1.79977	KO	1506	0.260057	0.739943	0.519711	iclipFeatures
chr2_34776113_34777547_Hspa5	1.79933	KO	1507	0.74166	0.25834	0.516947	iclipFeatures
chr13_54550633_54551290_Simc1	1.79932	KO	1508	0.260057	0.739943	0.486543	iclipFeatures
chr17_45585197_45585764_Slc29a1	1.79862	KO	1509	0.603697	0.396303	0.525205	iclipFeatures
chr9_57504836_57505450_Rpp25	1.79858	KO	1510	0.651572	0.348428	0.522818	iclipFeatures
chr6_18853634_18854059_Lsm8	1.79773	KO	1511	0.74166	0.25834	0.544257	iclipFeatures
chr7_44777221_44777515_Vrk3	1.79767	KO	1512	0.260833	0.739167	0.518743	iclipFeatures
chr17_80393751_80398180_Sos1	1.7972	KO	1513	0.451655	0.548345	0.518743	iclipFeatures
chr6_39397803_39399292_Mkrn1	1.79575	KO	1514	0.758638	0.241362	0.534453	iclipFeatures
chr2_121194834_121198505_Trp53bp1	1.79509	KO	1515	0.498356	0.501644	0.51303	iclipFeatures
chr13_69815689_69816096_Med10	1.79437	KO	1516	0.474437	0.525563	0.507772	iclipFeatures
chr9_99478371_99480743_Armc8	1.79421	KO	1517	0.486529	0.513471	0.550492	iclipFeatures
chr10_11609502_11610438_Timm8a1	1.79342	KO	1518	0.260057	0.739943	0.581191	iclipFeatures
chr1_167222882_167226381_Uck2	1.79129	KO	1519	0.760794	0.239206	0.581191	iclipFeatures
chr9_65828925_65833405_Trip4	1.79112	KO	1520	0.437339	0.562661	0.557361	iclipFeatures
chr8_106883861_106886301_Chtf8	1.79095	KO	1521	0.68908	0.31092	0.568505	iclipFeatures
chr6_142775340_142775714_Cmas	1.7899	KO	1522	0.688039	0.311961	0.576149	iclipFeatures
chrX_68715675_68717963_Fmr1	1.7892	KO	1523	0.758638	0.241362	0.626222	iclipFeatures
chr5_118762833_118765438_Med13l	1.789	KO	1524	0.758638	0.241362	0.576149	iclipFeatures
chr7_100160218_100161365_Lipt2	1.7881	KO	1525	0.260057	0.739943	0.607022	iclipFeatures
chr10_80130223_80130685_Stk11	1.7855	KO	1526	0.585878	0.414122	0.593427	iclipFeatures
chr5_5736316_5736673_Steap1	1.78538	KO	1527	0.562967	0.437033	0.594166	iclipFeatures
chr19_44303200_44306866_Scd2	1.78533	KO	1528	0.760794	0.239206	0.544308	iclipFeatures
chr18_36291055_36291305_Pura	1.78385	KO	1529	0.260057	0.739943	0.544524	iclipFeatures
chr2_69871182_69871846_Ssb	1.78311	KO	1530	0.746077	0.253923	0.565562	iclipFeatures
chr12_78837634_78840713_Mpp5	1.78002	KO	1531	0.553124	0.446876	0.569421	iclipFeatures
chr15_98038743_98042889_Senp1	1.77867	KO	1532	0.695435	0.304565	0.557017	iclipFeatures
chr5_31187557_31187833_Eif2b4	1.77818	KO	1533	0.260057	0.739943	0.547465	iclipFeatures
chr12_113136668_113137208_Mta1	1.7781	KO	1534	0.760794	0.239206	0.590665	iclipFeatures
chr12_28867095_28867493_Tssc1	1.77713	KO	1535	0.470436	0.529564	0.564629	iclipFeatures
chr10_80792738_80795461_Dot1l	1.77676	KO	1536	0.624473	0.375527	0.568963	iclipFeatures
chr2_30173446_30174092_Spout1	1.77674	KO	1537	0.438928	0.561072	0.548121	iclipFeatures
chr1_44001477_44003000_Tpp2	1.77661	KO	1538	0.665267	0.334733	0.597726	iclipFeatures
chr4_41114426_41115356_Nol6	1.77656	KO	1539	0.69206	0.30794	0.591168	iclipFeatures
chr13_46749086_46750605_Kif13a	1.77646	KO	1540	0.485714	0.514286	0.5824	iclipFeatures
chr7_114046781_114048163_Rras2	1.77635	KO	1541	0.596469	0.403531	0.596105	iclipFeatures
chr1_159344838_159347640_Rfwd2	1.77617	KO	1542	0.487014	0.512986	0.621853	iclipFeatures
chr4_15283350_15286753_Tmem64	1.77544	KO	1543	0.756099	0.243901	0.598376	iclipFeatures
chr11_106263170_106264158_Smarcd2	1.7751	KO	1544	0.695218	0.304782	0.583516	iclipFeatures
chr11_121147873_121148321_Tex19.1	1.77354	KO	1545	0.382752	0.617248	0.56095	iclipFeatures
chr8_40492537_40493986_Cnot7	1.77309	KO	1546	0.761527	0.238473	0.577167	iclipFeatures
chr18_31580167_31583190_Slc25a46	1.77275	KO	1547	0.696405	0.303595	0.602621	iclipFeatures
chrX_73354383_73359080_Zfp275	1.77242	KO	1548	0.430498	0.569502	0.58629	iclipFeatures
chr3_132981751_132983082_Gstcd	1.77194	KO	1549	0.543466	0.456534	0.591031	iclipFeatures
chr4_63133780_63139708_Zfp618	1.77157	KO	1550	0.260057	0.739943	0.59819	iclipFeatures
chr1_134630810_134635285_Kdm5b	1.77156	KO	1551	0.758638	0.241362	0.548557	iclipFeatures
chr9_42963841_42969181_Arhgef12	1.77151	KO	1552	0.741546	0.258454	0.553966	iclipFeatures
chr10_11213544_11217595_Shprh	1.7711	KO	1553	0.592795	0.407205	0.580098	iclipFeatures
chr11_62316425_62317842_Ncor1	1.77093	KO	1554	0.742628	0.257372	0.600772	iclipFeatures
chr19_7274657_7275225_Rcor2	1.76958	KO	1555	0.454337	0.545663	0.612946	iclipFeatures
chr16_13702257_13703612_Bfar	1.76753	KO	1556	0.265201	0.734799	0.612946	iclipFeatures
chr17_80580511_80581847_Map4k3	1.7669	KO	1557	0.750497	0.249503	0.581488	iclipFeatures
chr10_7905647_7907434_Tab2	1.76668	KO	1558	0.691815	0.308185	0.591973	iclipFeatures
chr1_82895058_82901182_Agfg1	1.76578	KO	1559	0.750204	0.249796	0.543716	iclipFeatures
chr2_32924026_32925254_Fam129b	1.76528	KO	1560	0.3818	0.6182	0.574146	iclipFeatures
chr8_95446095_95453366_Csnk2a2	1.76526	KO	1561	0.758638	0.241362	0.573632	iclipFeatures
chr12_38865769_38868215_Etv1	1.76445	KO	1562	0.426961	0.573039	0.558472	iclipFeatures
chr18_34318581_34322190_Apc	1.76409	KO	1563	0.697652	0.302348	0.565228	iclipFeatures
chr7_127254551_127254804_Zfp771	1.76392	KO	1564	0.260057	0.739943	0.541071	iclipFeatures
chr12_91555261_91559743_Gtf2a1	1.7616	KO	1565	0.758638	0.241362	0.578594	iclipFeatures
chr10_11609591_11610438_Gm9797	1.761	KO	1566	0.260057	0.739943	0.528938	iclipFeatures
chr13_70588688_70589600_Ice1	1.7609	KO	1567	0.598901	0.401099	0.561387	iclipFeatures
chr3_34068933_34070322_Fxr1	1.75975	KO	1568	0.759376	0.240624	0.567857	iclipFeatures
chr2_3455814_3458622_Suv39h2	1.75972	KO	1569	0.508632	0.491368	0.567857	iclipFeatures
chr18_20684598_20688320_B4galt6	1.75942	KO	1570	0.75703	0.24297	0.566338	iclipFeatures
chr11_115429660_115431275_Kctd2	1.75941	KO	1571	0.26208	0.73792	0.616412	iclipFeatures
chr8_109671320_109672447_Ist1	1.75936	KO	1572	0.751442	0.248558	0.631829	iclipFeatures
chr3_22210427_22216594_Tbl1xr1	1.75925	KO	1573	0.762358	0.237642	0.581975	iclipFeatures
chr7_140039500_140040605_Zfp511	1.75884	KO	1574	0.260057	0.739943	0.600634	iclipFeatures
chr2_22940072_22941871_Abi1	1.75815	KO	1575	0.74345	0.25655	0.586492	iclipFeatures
chr3_95945250_95947390_Anp32e	1.75796	KO	1576	0.760794	0.239206	0.635692	iclipFeatures
chr2_37569867_37584029_Strbp	1.75698	KO	1577	0.753076	0.246924	0.629243	iclipFeatures
chr11_87743313_87743618_Supt4a	1.75677	KO	1578	0.260833	0.739167	0.61648	iclipFeatures
chr1_165592175_165593677_Mpzl1	1.75611	KO	1579	0.695218	0.304782	0.653841	iclipFeatures
chr10_88445840_88447329_Gnptab	1.75539	KO	1580	0.615613	0.384387	0.65536	iclipFeatures
chr11_86210680_86212631_Ints2	1.75509	KO	1581	0.754076	0.245924	0.613486	iclipFeatures
chr8_94658800_94660276_Rspry1	1.75499	KO	1582	0.686953	0.313047	0.604384	iclipFeatures
chr3_68625858_68626482_Gm21949	1.75384	KO	1583	0.634731	0.365269	0.606164	iclipFeatures
chr3_68625858_68626482_Schip1	1.75384	KO	1584	0.633668	0.366332	0.570328	iclipFeatures
chr1_74267795_74268213_Arpc2	1.75299	KO	1585	0.758638	0.241362	0.578396	iclipFeatures
chr5_36600484_36602786_D5Ertd579e	1.75126	KO	1586	0.342049	0.657951	0.578852	iclipFeatures
chr7_116337264_116340040_Pik3c2a	1.74993	KO	1587	0.662061	0.337939	0.568899	iclipFeatures
chr16_10530206_10530812_Dexi	1.7498	KO	1588	0.278626	0.721374	0.574969	iclipFeatures
chr11_78255138_78255496_Sdf2	1.74964	KO	1589	0.336865	0.663135	0.566075	iclipFeatures
chr16_58465789_58469745_Dcbld2	1.74806	KO	1590	0.696288	0.303712	0.564556	iclipFeatures
chr11_101580618_101581951_Nbr1	1.7474	KO	1591	0.758638	0.241362	0.60643	iclipFeatures
chr10_128677170_128679529_Rab5b	1.7468	KO	1592	0.587424	0.412576	0.596079	iclipFeatures
chr1_134431658_134433351_Adipor1	1.74651	KO	1593	0.695435	0.304565	0.594222	iclipFeatures
chr17_86997060_87000069_Rhoq	1.74528	KO	1594	0.54472	0.45528	0.636399	iclipFeatures
chr10_69336634_69338554_Cdk1	1.74496	KO	1595	0.74345	0.25655	0.621017	iclipFeatures
chr8_111270942_111273019_Rfwd3	1.74486	KO	1596	0.760794	0.239206	0.609032	iclipFeatures
chr18_60571953_60572810_Rbm22	1.74395	KO	1597	0.558545	0.441455	0.611972	iclipFeatures
chr15_58047002_58048785_Zhx1	1.74317	KO	1598	0.260057	0.739943	0.592994	iclipFeatures
chr19_29143292_29143852_Rcl1	1.74313	KO	1599	0.758638	0.241362	0.575616	iclipFeatures
chr8_105713853_105716884_Gfod2	1.74264	KO	1600	0.542466	0.457534	0.566376	iclipFeatures
chr11_73175502_73176446_Emc6	1.7425	KO	1601	0.638795	0.361205	0.564619	iclipFeatures
chr4_41011535_41013873_Nfx1	1.74182	KO	1602	0.61682	0.38318	0.584844	iclipFeatures
chr4_48430857_48431205_Tex10	1.74105	KO	1603	0.505654	0.494346	0.614026	iclipFeatures
chr6_113333931_113334188_Ogg1	1.74022	KO	1604	0.370943	0.629057	0.575257	iclipFeatures
chr3_9427009_9438786_Zfp704	1.73945	KO	1605	0.651049	0.348951	0.576354	iclipFeatures
chr11_23489188_23490560_Usp34	1.73945	KO	1606	0.743222	0.256778	0.579917	iclipFeatures
chr15_103191543_103199715_Cbx5	1.73906	KO	1607	0.760794	0.239206	0.562524	iclipFeatures
chr14_75343764_75344426_Zc3h13	1.73824	KO	1608	0.551881	0.448119	0.586222	iclipFeatures
chr13_112968937_112969433_Dhx29	1.73738	KO	1609	0.370943	0.629057	0.614505	iclipFeatures
chr4_43583083_43587487_Rgp1	1.73722	KO	1610	0.553444	0.446556	0.593086	iclipFeatures
chr3_103167802_103169769_Dennd2c	1.73722	KO	1611	0.674423	0.325577	0.558164	iclipFeatures
chr10_7762803_7763150_Katna1	1.73662	KO	1612	0.442892	0.557108	0.527918	iclipFeatures
chr3_116631163_116632273_Mfsd14a	1.73548	KO	1613	0.742628	0.257372	0.498813	iclipFeatures
chr2_153208598_153210466_Tm9sf4	1.73489	KO	1614	0.653771	0.346229	0.536903	iclipFeatures
chr17_12227620_12228099_Map3k4	1.7347	KO	1615	0.436863	0.563137	0.556743	iclipFeatures
chr12_111827853_111828388_Zfyve21	1.73379	KO	1616	0.394001	0.605999	0.556374	iclipFeatures
chr4_53021360_53022060_Nipsnap3b	1.73244	KO	1617	0.458337	0.541663	0.588164	iclipFeatures
chr12_103407975_103408235_Ddx24	1.7323	KO	1618	0.260833	0.739167	0.589765	iclipFeatures
chr2_162934757_162937121_Srsf6	1.73176	KO	1619	0.751843	0.248157	0.600467	iclipFeatures
chr4_8606421_8607778_Rab2a	1.731	KO	1620	0.751843	0.248157	0.615794	iclipFeatures
chr5_114138376_114139323_Ung	1.73086	KO	1621	0.670729	0.329271	0.6509	iclipFeatures
chr7_122078560_122082199_Ubfd1	1.73055	KO	1622	0.760794	0.239206	0.6746	iclipFeatures
chr11_117852807_117855744_Birc5	1.7301	KO	1623	0.758638	0.241362	0.695561	iclipFeatures
chr11_74673948_74677812_Pafah1b1	1.72804	KO	1624	0.760794	0.239206	0.696135	iclipFeatures
chr6_48062394_48063831_Zfp746	1.72673	KO	1625	0.590128	0.409872	0.671401	iclipFeatures
chr4_155154072_155157340_Ski	1.72538	KO	1626	0.745065	0.254935	0.632999	iclipFeatures
chr3_54728481_54728762_Supt20	1.72461	KO	1627	0.695335	0.304665	0.582926	iclipFeatures
chr15_88826425_88826681_Creld2	1.72417	KO	1628	0.470436	0.529564	0.581325	iclipFeatures
chr14_55023885_55024137_Ngdn	1.72284	KO	1629	0.757587	0.242413	0.574789	iclipFeatures
chr13_9684834_9686903_Zmynd11	1.72031	KO	1630	0.504507	0.495493	0.571988	iclipFeatures
chr15_89426348_89426598_Chkb	1.71827	KO	1631	0.28671	0.71329	0.573561	iclipFeatures
chr7_99317672_99320352_Map6	1.71783	KO	1632	0.260057	0.739943	0.570185	iclipFeatures
chr4_126861819_126864109_Zmym4	1.71685	KO	1633	0.742628	0.257372	0.597404	iclipFeatures
chr18_10627724_10628230_Snrpd1	1.71625	KO	1634	0.695435	0.304565	0.547651	iclipFeatures
chr10_127197066_127199063_Pip4k2c	1.71602	KO	1635	0.562119	0.437881	0.573064	iclipFeatures
chr7_119715092_119716835_Thumpd1	1.71543	KO	1636	0.760794	0.239206	0.588987	iclipFeatures
chr18_34837670_34839370_Kdm3b	1.71526	KO	1637	0.66158	0.33842	0.616339	iclipFeatures
chr5_30674037_30674837_Cenpa	1.71515	KO	1638	0.742628	0.257372	0.61794	iclipFeatures
chr19_6938061_6938369_Gpr137	1.71456	KO	1639	0.260057	0.739943	0.595851	iclipFeatures
chr15_36997026_37001063_Zfp706	1.71386	KO	1640	0.758638	0.241362	0.605406	iclipFeatures
chr6_70904288_70905245_Eif2ak3	1.71332	KO	1641	0.445935	0.554065	0.568727	iclipFeatures
chr9_64715298_64717019_Rab11a	1.71212	KO	1642	0.533575	0.466425	0.564877	iclipFeatures
chr2_119648989_119651244_Nusap1	1.71187	KO	1643	0.758638	0.241362	0.566478	iclipFeatures
chr10_122078113_122081513_Tmem5	1.7118	KO	1644	0.474547	0.525453	0.616336	iclipFeatures
chr1_59711253_59719044_Nop58	1.70965	KO	1645	0.657668	0.342332	0.616552	iclipFeatures
chr14_54690233_54690742_1700123O20Rik	1.70951	KO	1646	0.394001	0.605999	0.626761	iclipFeatures
chr7_122148154_122149047_Dctn5	1.70917	KO	1647	0.623085	0.376915	0.643863	iclipFeatures
chr8_109860195_109864209_Ap1g1	1.70772	KO	1648	0.758638	0.241362	0.639806	iclipFeatures
chr8_75030033_75031978_Hmgxb4	1.70736	KO	1649	0.758638	0.241362	0.668215	iclipFeatures
chr4_118208212_118209820_Ptprf	1.70705	KO	1650	0.760794	0.239206	0.672513	iclipFeatures
chr8_108957102_108961636_Zfhx3	1.70578	KO	1651	0.548028	0.451972	0.693003	iclipFeatures
chr17_86831102_86833411_Epas1	1.70577	KO	1652	0.704593	0.295407	0.705035	iclipFeatures
chr5_66298724_66302541_Apbb2	1.70543	KO	1653	0.718068	0.281932	0.684156	iclipFeatures
chr19_60761114_60762080_Eif3a	1.70355	KO	1654	0.758638	0.241362	0.65654	iclipFeatures
chr14_50926888_50927188_Apex1	1.70308	KO	1655	0.70065	0.29935	0.647188	iclipFeatures
chr5_31156003_31157548_Gtf3c2	1.70226	KO	1656	0.598901	0.401099	0.649456	iclipFeatures
chr9_31068755_31075885_Zbtb44	1.7017	KO	1657	0.743397	0.256603	0.63986	iclipFeatures
chr9_35504220_35507652_Cdon	1.70066	KO	1658	0.549853	0.450147	0.643917	iclipFeatures
chr16_59490774_59493596_Crybg3	1.70053	KO	1659	0.482478	0.517522	0.594059	iclipFeatures
chr11_88830791_88831754_Akap1	1.70051	KO	1660	0.667272	0.332728	0.593713	iclipFeatures
chr7_120730661_120734854_BC030336	1.69972	KO	1661	0.570713	0.429287	0.6014	iclipFeatures
chr5_113742445_113743128_Sart3	1.69749	KO	1662	0.608629	0.391371	0.570238	iclipFeatures
chr11_6467598_6474911_Purb	1.69734	KO	1663	0.758638	0.241362	0.555409	iclipFeatures
chr9_44410158_44410413_Ccdc84	1.69609	KO	1664	0.260057	0.739943	0.571571	iclipFeatures
chr10_128697938_128699105_Cdk2	1.69548	KO	1665	0.697197	0.302803	0.530849	iclipFeatures
chr2_30149765_30152015_Tbc1d13	1.6944	KO	1666	0.67577	0.32423	0.519472	iclipFeatures
chr12_87273702_87273997_Ahsa1	1.69255	KO	1667	0.431772	0.568228	0.533719	iclipFeatures
chr9_96181780_96184608_Gk5	1.69084	KO	1668	0.401566	0.598434	0.523441	iclipFeatures
chr18_67206100_67207887_Chmp1b	1.69044	KO	1669	0.644092	0.355908	0.55657	iclipFeatures
chr17_25231867_25234443_Unkl	1.6904	KO	1670	0.260057	0.739943	0.562714	iclipFeatures
chr2_153265883_153270249_Pofut1	1.68965	KO	1671	0.456947	0.543053	0.560904	iclipFeatures
chr1_85849221_85851578_Cab39	1.68918	KO	1672	0.75109	0.24891	0.588095	iclipFeatures
chr1_54395876_54397879_Gtf3c3	1.68861	KO	1673	0.655866	0.344134	0.622883	iclipFeatures
chr6_98925337_98930089_Foxp1	1.68859	KO	1674	0.591339	0.408661	0.597874	iclipFeatures
chr8_111003185_111008280_Ddx19b	1.68675	KO	1675	0.758638	0.241362	0.597874	iclipFeatures
chr2_128610082_128612956_Anapc1	1.68643	KO	1676	0.657668	0.342332	0.589519	iclipFeatures
chr7_121642020_121648183_Usp31	1.68586	KO	1677	0.703686	0.296314	0.557407	iclipFeatures
chr11_106054855_106059324_Dcaf7	1.68542	KO	1678	0.749448	0.250552	0.538266	iclipFeatures
chr7_109711893_109712189_Akip1	1.68495	KO	1679	0.394001	0.605999	0.534204	iclipFeatures
chr14_12301123_12303231_3830406C13Rik	1.68329	KO	1680	0.260057	0.739943	0.484626	iclipFeatures
chr9_110981679_110984066_Lrrc2	1.68237	KO	1681	0.373394	0.626606	0.495022	iclipFeatures
chrX_134696415_134697772_Armcx4	1.68196	KO	1682	0.429976	0.570024	0.500732	iclipFeatures
chr2_5229188_5230878_Ccdc3	1.68145	KO	1683	0.464452	0.535548	0.500897	iclipFeatures
chr1_171463094_171464603_F11r	1.68144	KO	1684	0.550717	0.449283	0.50759	iclipFeatures
chr7_82306864_82307420_Sh3gl3	1.6813	KO	1685	0.26286	0.73714	0.507792	iclipFeatures
chr18_12990558_12992948_Impact	1.68053	KO	1686	0.761627	0.238373	0.498852	iclipFeatures
chrX_150983132_150986103_Gnl3l	1.67993	KO	1687	0.760794	0.239206	0.499321	iclipFeatures
chr18_60556441_60558762_Dctn4	1.67846	KO	1688	0.75109	0.24891	0.52874	iclipFeatures
chr12_85234465_85235628_Mlh3	1.6771	KO	1689	0.46093	0.53907	0.499674	iclipFeatures
chr7_25199912_25200162_Dedd2	1.67596	KO	1690	0.26208	0.73792	0.54954	iclipFeatures
chrX_166499811_166502317_Tceanc	1.6759	KO	1691	0.283996	0.716004	0.549241	iclipFeatures
chr6_86564199_86564449_1600020E01Rik	1.67578	KO	1692	0.434663	0.565337	0.534025	iclipFeatures
chr4_129148001_129151074_S100pbp	1.67559	KO	1693	0.758638	0.241362	0.523156	iclipFeatures
chr11_109575131_109577035_Wipi1	1.67553	KO	1694	0.260057	0.739943	0.503069	iclipFeatures
chr8_64718138_64718985_Msmo1	1.67547	KO	1695	0.761527	0.238473	0.502867	iclipFeatures
chr10_76351253_76351738_Pcnt	1.67533	KO	1696	0.758638	0.241362	0.540347	iclipFeatures
chr1_171340570_171342530_Nit1	1.67504	KO	1697	0.608629	0.391371	0.528913	iclipFeatures
chr2_31801899_31804362_Abl1	1.67418	KO	1698	0.642404	0.357596	0.526546	iclipFeatures
chr11_93932219_93932781_Mbtd1	1.67385	KO	1699	0.260057	0.739943	0.537634	iclipFeatures
chr11_121222406_121222656_Hexdc	1.67354	KO	1700	0.260057	0.739943	0.534437	iclipFeatures
chr10_80665317_80667106_Mknk2	1.67321	KO	1701	0.658805	0.341195	0.51487	iclipFeatures
chr3_95896371_95898592_Aph1a	1.67276	KO	1702	0.320317	0.679683	0.507012	iclipFeatures
chr15_82808446_82809787_Tcf20	1.67198	KO	1703	0.734968	0.265032	0.50893	iclipFeatures
chr6_71807801_71810710_Reep1	1.67149	KO	1704	0.370943	0.629057	0.558788	iclipFeatures
chr7_126382853_126384980_Nfatc2ip	1.67148	KO	1705	0.729555	0.270445	0.598227	iclipFeatures
chr1_37262096_37263384_Cnga3	1.67144	KO	1706	0.562967	0.437033	0.603805	iclipFeatures
chr9_110617979_110618633_Setd2	1.67132	KO	1707	0.53005	0.46995	0.647637	iclipFeatures
chr7_140809676_140811428_Zfp941	1.67105	KO	1708	0.66158	0.33842	0.650004	iclipFeatures
chr2_83663987_83664622_Zc3h15	1.66987	KO	1709	0.758638	0.241362	0.638915	iclipFeatures
chr2_132249161_132249728_Pcna	1.66923	KO	1710	0.654448	0.345552	0.635396	iclipFeatures
chr6_37965710_37968445_Trim24	1.66891	KO	1711	0.714583	0.285417	0.616288	iclipFeatures
chr5_36471402_36474080_Grpel1	1.66612	KO	1712	0.758638	0.241362	0.6385	iclipFeatures
chr1_172377970_172384099_Pigm	1.66572	KO	1713	0.758638	0.241362	0.636416	iclipFeatures
chr11_69850400_69852058_Plscr3	1.66544	KO	1714	0.260057	0.739943	0.63586	iclipFeatures
chr3_89782288_89784000_Ube2q1	1.66412	KO	1715	0.694364	0.305636	0.626057	iclipFeatures
chr6_81958071_81959915_Gcfc2	1.66302	KO	1716	0.371884	0.628116	0.588804	iclipFeatures
chr16_37881462_37888858_Lrrc58	1.66285	KO	1717	0.75217	0.24783	0.562648	iclipFeatures
chr10_117215139_117215666_Yeats4	1.66197	KO	1718	0.640739	0.359261	0.526386	iclipFeatures
chr15_98831668_98834499_Kmt2d	1.65968	KO	1719	0.753076	0.246924	0.541126	iclipFeatures
chr16_13715055_13715553_Pla2g10	1.65958	KO	1720	0.55642	0.44358	0.510594	iclipFeatures
chr17_74423413_74424229_Slc30a6	1.65893	KO	1721	0.342049	0.657951	0.549485	iclipFeatures
chr5_31054367_31054633_Atraid	1.65746	KO	1722	0.497081	0.502919	0.550347	iclipFeatures
chr3_122955585_122957554_Usp53	1.6574	KO	1723	0.396023	0.603977	0.562137	iclipFeatures
chr4_149744035_149744737_Slc25a33	1.65699	KO	1724	0.407451	0.592549	0.543126	iclipFeatures
chr3_137908321_137916557_Dnajb14	1.65693	KO	1725	0.389047	0.610953	0.539804	iclipFeatures
chr10_91147570_91149475_Tmpo	1.65554	KO	1726	0.760794	0.239206	0.571227	iclipFeatures
chr9_62791818_62796284_Fem1b	1.65248	KO	1727	0.760794	0.239206	0.558614	iclipFeatures
chr1_151469404_151471315_Rnf2	1.65207	KO	1728	0.758638	0.241362	0.588089	iclipFeatures
chr13_98246801_98249257_Utp15	1.65158	KO	1729	0.562967	0.437033	0.604244	iclipFeatures
chr5_3689998_3692755_Ankib1	1.65011	KO	1730	0.523196	0.476804	0.641394	iclipFeatures
chr5_115297109_115298763_Dynll1	1.64967	KO	1731	0.656284	0.343716	0.630534	iclipFeatures
chr18_84207701_84208741_Zfp407	1.64935	KO	1732	0.370943	0.629057	0.613266	iclipFeatures
chr4_45395922_45399240_Slc25a51	1.64805	KO	1733	0.690779	0.309221	0.563486	iclipFeatures
chr8_23171264_23174551_Gpat4	1.6479	KO	1734	0.568995	0.431005	0.561436	iclipFeatures
chr17_53670868_53672721_Kat2b	1.64738	KO	1735	0.760554	0.239446	0.584726	iclipFeatures
chr12_72100828_72101529_Jkamp	1.646	KO	1736	0.652185	0.347815	0.595177	iclipFeatures
chr14_57832701_57836646_Zdhhc20	1.64382	KO	1737	0.588122	0.411878	0.634162	iclipFeatures
chr15_82206951_82207212_Shisa8	1.64306	KO	1738	0.260833	0.739167	0.641164	iclipFeatures
chr1_139447530_139453007_Zbtb41	1.64188	KO	1739	0.542466	0.457534	0.653808	iclipFeatures
chr11_84078919_84079591_Tada2a	1.64149	KO	1740	0.756099	0.243901	0.653616	iclipFeatures
chr9_94517863_94520314_1190002N15Rik	1.64118	KO	1741	0.760794	0.239206	0.625492	iclipFeatures
chr17_29041249_29043372_Srsf3	1.64097	KO	1742	0.760794	0.239206	0.617395	iclipFeatures
chr10_121587379_121590193_Xpot	1.64087	KO	1743	0.760794	0.239206	0.617318	iclipFeatures
chr8_84869004_84869257_Farsa	1.63933	KO	1744	0.695435	0.304565	0.637226	iclipFeatures
chr18_62504058_62504701_Fbxo38	1.63931	KO	1745	0.758638	0.241362	0.636561	iclipFeatures
chr11_5191551_5194952_Kremen1	1.63883	KO	1746	0.370943	0.629057	0.609259	iclipFeatures
chr2_148691048_148692949_Gzf1	1.63741	KO	1747	0.507157	0.492843	0.559904	iclipFeatures
chr6_65935969_65936990_Prdm5	1.63731	KO	1748	0.260057	0.739943	0.552661	iclipFeatures
chr5_88756081_88764220_Mob1b	1.63692	KO	1749	0.741546	0.258454	0.542249	iclipFeatures
chr13_21192588_21194724_Trim27	1.63675	KO	1750	0.749448	0.250552	0.535821	iclipFeatures
chr16_97791466_97794179_Prdm15	1.63666	KO	1751	0.487775	0.512225	0.574806	iclipFeatures
chr11_120610061_120610668_Pcyt2	1.63627	KO	1752	0.26725	0.73275	0.559197	iclipFeatures
chr12_102568581_102570125_Itpk1	1.63572	KO	1753	0.688362	0.311638	0.570626	iclipFeatures
chr10_108279392_108279762_Ppp1r12a	1.63571	KO	1754	0.591311	0.408689	0.522477	iclipFeatures
chr8_111863037_111866365_Tmem170	1.63533	KO	1755	0.694364	0.305636	0.510899	iclipFeatures
chr9_65659437_65660528_Rbpms2	1.63512	KO	1756	0.760794	0.239206	0.537985	iclipFeatures
chr15_27730648_27732481_Trio	1.63456	KO	1757	0.351068	0.648932	0.587339	iclipFeatures
chr15_79248992_79249484_Pick1	1.6339	KO	1758	0.374337	0.625663	0.588037	iclipFeatures
chr16_87483178_87483517_Usp16	1.6335	KO	1759	0.260057	0.739943	0.604769	iclipFeatures
chr5_121439863_121442551_Naa25	1.63037	KO	1760	0.633668	0.366332	0.561875	iclipFeatures
chr13_9170942_9174451_Larp4b	1.62943	KO	1761	0.758638	0.241362	0.511879	iclipFeatures
chr17_13903929_13906150_Afdn	1.62873	KO	1762	0.760794	0.239206	0.502778	iclipFeatures
chr13_112867568_112867894_Plpp1	1.62865	KO	1763	0.695335	0.304665	0.491428	iclipFeatures
chr6_83340253_83343776_Mob1a	1.62841	KO	1764	0.758638	0.241362	0.503138	iclipFeatures
chrX_12036737_12037625_Bcor	1.62823	KO	1765	0.265423	0.734577	0.484467	iclipFeatures
chr9_63646766_63650261_Smad3	1.62819	KO	1766	0.260833	0.739167	0.484551	iclipFeatures
chr17_22337986_22338785_Zfp944	1.62807	KO	1767	0.260057	0.739943	0.484156	iclipFeatures
chr9_106658745_106659026_Tex264	1.62761	KO	1768	0.260833	0.739167	0.490409	iclipFeatures
chr2_150832487_150833100_Abhd12	1.62707	KO	1769	0.377163	0.622837	0.453946	iclipFeatures
chr5_103861972_103863067_Klhl8	1.62654	KO	1770	0.446957	0.553043	0.493032	iclipFeatures
chr1_97706042_97707952_Ppip5k2	1.62615	KO	1771	0.759477	0.240523	0.50918	iclipFeatures
chr6_71588969_71589634_Kdm3a	1.62597	KO	1772	0.756841	0.243159	0.552065	iclipFeatures
chr4_4762483_4767703_Impad1	1.6258	KO	1773	0.757871	0.242129	0.569361	iclipFeatures
chr13_59449534_59450231_Agtpbp1	1.62454	KO	1774	0.394001	0.605999	0.568739	iclipFeatures
chr17_85015447_85017128_Ppm1b	1.62377	KO	1775	0.656284	0.343716	0.582969	iclipFeatures
chr12_116058952_116063361_Zfp386	1.6235	KO	1776	0.422317	0.577683	0.533027	iclipFeatures
chr8_122433595_122434094_Mvd	1.62241	KO	1777	0.688904	0.311096	0.494437	iclipFeatures
chr16_18834105_18835261_Ufd1l	1.62215	KO	1778	0.433792	0.566208	0.444733	iclipFeatures
chr2_158786150_158786637_Fam83d	1.62206	KO	1779	0.370943	0.629057	0.480553	iclipFeatures
chr8_83999875_84000412_Samd1	1.6213	KO	1780	0.589259	0.410741	0.478143	iclipFeatures
chr3_34677743_34677993_Sox2ot	1.62096	KO	1781	0.260057	0.739943	0.480671	iclipFeatures
chr2_180176033_180176288_Adrm1	1.62045	KO	1782	0.370943	0.629057	0.437875	iclipFeatures
chrX_134362002_134363104_Cenpi	1.61924	KO	1783	0.260833	0.739167	0.434596	iclipFeatures
chr6_87814268_87819095_Isy1	1.61896	KO	1784	0.752194	0.247806	0.4438	iclipFeatures
chr11_70940098_70943105_Rabep1	1.61891	KO	1785	0.632186	0.367814	0.450319	iclipFeatures
chr2_104426480_104429854_Hipk3	1.61866	KO	1786	0.447602	0.552398	0.480313	iclipFeatures
chr13_45410510_45412019_Mylip	1.6183	KO	1787	0.26094	0.73906	0.469225	iclipFeatures
chr9_80143862_80144953_Senp6	1.6182	KO	1788	0.401005	0.598995	0.469147	iclipFeatures
chr16_35825398_35828462_Hspbap1	1.6173	KO	1789	0.462983	0.537017	0.468082	iclipFeatures
chr2_119609531_119610318_Oip5	1.61671	KO	1790	0.654448	0.345552	0.480943	iclipFeatures
chr11_74669610_74670849_Cluh	1.6165	KO	1791	0.560001	0.439999	0.484924	iclipFeatures
chr11_76208007_76209416_Fam57a	1.61603	KO	1792	0.260057	0.739943	0.51931	iclipFeatures
chr7_19581034_19581293_Clasrp	1.61551	KO	1793	0.260057	0.739943	0.555105	iclipFeatures
chr5_33640054_33640811_Slbp	1.61438	KO	1794	0.741546	0.258454	0.58467	iclipFeatures
chr12_105836860_105838943_Papola	1.61386	KO	1795	0.760794	0.239206	0.573842	iclipFeatures
chr16_20123106_20127744_Klhl24	1.61308	KO	1796	0.487413	0.512587	0.543848	iclipFeatures
chr2_76695502_76697335_Plekha3	1.61307	KO	1797	0.604796	0.395204	0.593921	iclipFeatures
chr1_179744893_179746480_Ahctf1	1.61258	KO	1798	0.758954	0.241046	0.630631	iclipFeatures
chr17_28970884_28972545_Stk38	1.61256	KO	1799	0.758638	0.241362	0.632555	iclipFeatures
chr2_173033510_173034734_Rbm38	1.61199	KO	1800	0.546165	0.453835	0.622634	iclipFeatures
chr4_24602646_24602950_Mms22l	1.6116	KO	1801	0.260057	0.739943	0.611081	iclipFeatures
chr4_123054292_123054949_Trit1	1.6115	KO	1802	0.760794	0.239206	0.59499	iclipFeatures
chr2_3488849_3489144_Hspa14	1.61137	KO	1803	0.627149	0.372851	0.594959	iclipFeatures
chr16_8688721_8690825_Usp7	1.61041	KO	1804	0.760794	0.239206	0.584906	iclipFeatures
chr7_126101714_126102288_Xpo6	1.61034	KO	1805	0.66158	0.33842	0.606127	iclipFeatures
chr17_23610764_23611019_Zscan10	1.61016	KO	1806	0.371884	0.628116	0.655435	iclipFeatures
chr7_10487223_10489776_Zik1	1.60915	KO	1807	0.443886	0.556114	0.642587	iclipFeatures
chr17_34028265_34028795_Slc39a7	1.60818	KO	1808	0.758638	0.241362	0.645742	iclipFeatures
chr9_99385419_99388404_Mras	1.60814	KO	1809	0.658116	0.341884	0.628588	iclipFeatures
chr19_16383394_16387463_Gnaq	1.60751	KO	1810	0.758368	0.241632	0.614006	iclipFeatures
chr5_130241219_130243765_Tmem248	1.60691	KO	1811	0.753137	0.246863	0.635743	iclipFeatures
chr2_69108594_69114283_Cers6	1.60661	KO	1812	0.632314	0.367686	0.617875	iclipFeatures
chr3_89999586_90000895_Ubap2l	1.60661	KO	1813	0.658699	0.341301	0.61809	iclipFeatures
chr18_38316612_38317849_Rnf14	1.60627	KO	1814	0.589259	0.410741	0.606651	iclipFeatures
chr14_61531850_61535143_Spryd7	1.60584	KO	1815	0.515755	0.484245	0.557267	iclipFeatures
chr1_36140026_36144225_Uggt1	1.60338	KO	1816	0.589259	0.410741	0.507959	iclipFeatures
chr16_36871834_36872721_Iqcb1	1.60334	KO	1817	0.265201	0.734799	0.471013	iclipFeatures
chr5_122456323_122457150_Atp2a2	1.60313	KO	1818	0.760794	0.239206	0.471529	iclipFeatures
chr17_5343011_5347656_Arid1b	1.60274	KO	1819	0.54372	0.45628	0.482125	iclipFeatures
chr11_53600852_53604246_Kif3a	1.60143	KO	1820	0.26453	0.73547	0.506629	iclipFeatures
chr7_44862400_44862992_Pnkp	1.60138	KO	1821	0.260057	0.739943	0.473709	iclipFeatures
chr14_30595353_30595866_Prkcd	1.59961	KO	1822	0.26286	0.73714	0.506323	iclipFeatures
chr16_95999269_96002188_Brwd1	1.59871	KO	1823	0.663857	0.336143	0.499787	iclipFeatures
chr1_51749757_51751272_Myo1b	1.59865	KO	1824	0.695218	0.304782	0.515365	iclipFeatures
chr1_191778534_191784257_Lpgat1	1.59849	KO	1825	0.760794	0.239206	0.514917	iclipFeatures
chr16_18564286_18566680_Gnb1l	1.59815	KO	1826	0.260057	0.739943	0.515119	iclipFeatures
chr5_123728425_123729176_Rsrc2	1.59776	KO	1827	0.591339	0.408661	0.5546	iclipFeatures
chr19_53379213_53380463_Smndc1	1.59762	KO	1828	0.695435	0.304565	0.528699	iclipFeatures
chr10_80640076_80640771_Csnk1g2	1.597	KO	1829	0.699498	0.300502	0.48563	iclipFeatures
chr10_104196203_104196522_Gm20765	1.59626	KO	1830	0.260057	0.739943	0.485488	iclipFeatures
chr10_104196203_104196522_Gm4340	1.59626	KO	1831	0.26208	0.73792	0.491138	iclipFeatures
chr9_20428317_20436386_Zfp26	1.59603	KO	1832	0.657668	0.342332	0.508084	iclipFeatures
chr5_30058199_30061241_Tyms	1.59554	KO	1833	0.404845	0.595155	0.476968	iclipFeatures
chr10_81621784_81622412_Sirt6	1.59411	KO	1834	0.26453	0.73547	0.454148	iclipFeatures
chr10_116485160_116486250_Cnot2	1.59395	KO	1835	0.759376	0.240624	0.492707	iclipFeatures
chr18_5773066_5775468_Zeb1	1.59312	KO	1836	0.316553	0.683447	0.528181	iclipFeatures
chr10_62580245_62582349_Ddx21	1.59299	KO	1837	0.760794	0.239206	0.521451	iclipFeatures
chr19_6080761_6081027_Zfpl1	1.59202	KO	1838	0.384279	0.615721	0.506972	iclipFeatures
chr4_135975459_135976394_Pithd1	1.59183	KO	1839	0.471295	0.528705	0.547067	iclipFeatures
chr8_105251684_105253053_D230025D16Rik	1.59158	KO	1840	0.645649	0.354351	0.500416	iclipFeatures
chr6_124833030_124833703_Cdca3	1.5912	KO	1841	0.61682	0.38318	0.542591	iclipFeatures
chr3_116548200_116549981_Dbt	1.59087	KO	1842	0.590368	0.409632	0.542121	iclipFeatures
chrX_36608182_36610972_Akap17b	1.58998	KO	1843	0.260057	0.739943	0.555735	iclipFeatures
chr15_12934995_12935291_Drosha	1.58935	KO	1844	0.665485	0.334515	0.582945	iclipFeatures
chr2_145915889_145916425_Naa20	1.5881	KO	1845	0.292858	0.707142	0.59446	iclipFeatures
chr5_138133883_138134265_Zscan21	1.58743	KO	1846	0.738305	0.261695	0.559298	iclipFeatures
chr4_135412307_135416419_Rcan3	1.58715	KO	1847	0.756099	0.243901	0.52963	iclipFeatures
chr14_36874935_36879698_Ccser2	1.58712	KO	1848	0.520416	0.479584	0.579489	iclipFeatures
chr6_148921034_148923030_Fam60a	1.58687	KO	1849	0.743397	0.256603	0.560115	iclipFeatures
chr2_91013365_91019497_Celf1	1.58658	KO	1850	0.760794	0.239206	0.578411	iclipFeatures
chr11_84040928_84044578_Synrg	1.58644	KO	1851	0.265201	0.734799	0.58066	iclipFeatures
chr6_118501307_118503022_Ankrd26	1.58611	KO	1852	0.293693	0.706307	0.548231	iclipFeatures
chr1_125392904_125393994_Actr3	1.58543	KO	1853	0.758638	0.241362	0.533485	iclipFeatures
chr19_41941085_41944552_Mms19	1.58502	KO	1854	0.471744	0.528256	0.49624	iclipFeatures
chr3_14564452_14568303_Lrrcc1	1.58456	KO	1855	0.475822	0.524178	0.44923	iclipFeatures
chr17_24942151_24944490_Hn1l	1.58404	KO	1856	0.760794	0.239206	0.498647	iclipFeatures
chr2_25222157_25222407_Tubb4b	1.58347	KO	1857	0.431813	0.568187	0.54476	iclipFeatures
chr8_36216062_36217442_Lonrf1	1.58328	KO	1858	0.372955	0.627045	0.513299	iclipFeatures
chr1_10136145_10136768_Cspp1	1.58326	KO	1859	0.370943	0.629057	0.49241	iclipFeatures
chr5_137314557_137314950_Slc12a9	1.58291	KO	1860	0.290694	0.709306	0.520692	iclipFeatures
chr5_124368701_124374528_Sbno1	1.58287	KO	1861	0.759376	0.240624	0.503538	iclipFeatures
chr3_19219106_19220817_Mtfr1	1.58286	KO	1862	0.754823	0.245177	0.531081	iclipFeatures
chr2_131246789_131248025_Mavs	1.58069	KO	1863	0.444023	0.555977	0.553626	iclipFeatures
chr14_56524781_56525032_Rnf17	1.58027	KO	1864	0.26286	0.73714	0.592611	iclipFeatures
chr5_110259129_110260286_Pgam5	1.58019	KO	1865	0.758638	0.241362	0.58975	iclipFeatures
chr18_76304730_76311747_Smad2	1.5798	KO	1866	0.589259	0.410741	0.589676	iclipFeatures
chr3_88361108_88362338_Smg5	1.57899	KO	1867	0.707242	0.292758	0.553594	iclipFeatures
chr2_118641319_118641592_Bub1b	1.57723	KO	1868	0.598401	0.401599	0.58092	iclipFeatures
chr15_31455898_31459188_March6	1.57714	KO	1869	0.760794	0.239206	0.614133	iclipFeatures
chr11_107671342_107672287_Helz	1.5744	KO	1870	0.26208	0.73792	0.600354	iclipFeatures
chr6_140650786_140655481_Aebp2	1.57367	KO	1871	0.758638	0.241362	0.569291	iclipFeatures
chr9_35216964_35217747_Fam118b	1.57321	KO	1872	0.394001	0.605999	0.541533	iclipFeatures
chr14_31506617_31509858_Eaf1	1.57209	KO	1873	0.717291	0.282709	0.528538	iclipFeatures
chr7_113315625_113316428_Btbd10	1.57148	KO	1874	0.59499	0.40501	0.528538	iclipFeatures
chr14_67740412_67742310_Kctd9	1.57089	KO	1875	0.620849	0.379151	0.576593	iclipFeatures
chr12_69189086_69189887_Dnaaf2	1.57086	KO	1876	0.278626	0.721374	0.539005	iclipFeatures
chr8_122481697_122481981_Piezo1	1.57074	KO	1877	0.429663	0.570337	0.573771	iclipFeatures
chr12_52567338_52567852_Arhgap5	1.57004	KO	1878	0.468453	0.531547	0.57715	iclipFeatures
chrX_13291492_13294052_Ddx3x	1.56764	KO	1879	0.760794	0.239206	0.573948	iclipFeatures
chr4_57892967_57896984_Pakap	1.56714	KO	1880	0.742628	0.257372	0.575844	iclipFeatures
chrX_130460935_130465834_Diaph2	1.56704	KO	1881	0.382752	0.617248	0.573987	iclipFeatures
chr13_73514288_73516422_Lpcat1	1.56657	KO	1882	0.74166	0.25834	0.557027	iclipFeatures
chr10_128817411_128819446_Dnajc14	1.5638	KO	1883	0.75109	0.24891	0.536265	iclipFeatures
chr16_49018383_49019705_C330027C09Rik	1.56327	KO	1884	0.562967	0.437033	0.522494	iclipFeatures
chr15_12270071_12272240_Mtmr12	1.56255	KO	1885	0.639811	0.360189	0.485947	iclipFeatures
chr10_104196243_104196493_Gm21304	1.56191	KO	1886	0.260057	0.739943	0.473678	iclipFeatures
chr10_104196243_104196493_Gm6763	1.56191	KO	1887	0.260057	0.739943	0.473666	iclipFeatures
chr10_104196243_104196493_Gm8764	1.56191	KO	1888	0.260833	0.739167	0.456734	iclipFeatures
chr18_3434975_3436700_Cul2	1.56116	KO	1889	0.623085	0.376915	0.426443	iclipFeatures
chr12_110869078_110869998_Zfp839	1.56101	KO	1890	0.377163	0.622837	0.388467	iclipFeatures
chr9_123694415_123700097_Lztfl1	1.56087	KO	1891	0.260057	0.739943	0.438541	iclipFeatures
chr5_125385964_125386221_Ubc	1.56005	KO	1892	0.741546	0.258454	0.460465	iclipFeatures
chr14_49012143_49014160_Exoc5	1.55954	KO	1893	0.581765	0.418235	0.508823	iclipFeatures
chr10_104196203_104196493_Gm21293	1.55745	KO	1894	0.260057	0.739943	0.522594	iclipFeatures
chr12_69965011_69966139_Sav1	1.55691	KO	1895	0.260057	0.739943	0.550645	iclipFeatures
chr11_95957161_95963499_Igf2bp1	1.55674	KO	1896	0.760794	0.239206	0.552502	iclipFeatures
chrX_135803103_135803474_Gprasp1	1.55635	KO	1897	0.479299	0.520701	0.504353	iclipFeatures
chr4_57892891_57896984_Akap2	1.55622	KO	1898	0.744413	0.255587	0.503345	iclipFeatures
chr19_38967827_38971051_Hells	1.55552	KO	1899	0.760794	0.239206	0.529562	iclipFeatures
chr5_105814305_105815215_Lrrc8d	1.55486	KO	1900	0.657668	0.342332	0.563645	iclipFeatures
chr6_71880637_71881152_Ptcd3	1.55482	KO	1901	0.278626	0.721374	0.516466	iclipFeatures
chr12_72911658_72913311_4930447C04Rik	1.55465	KO	1902	0.260057	0.739943	0.54319	iclipFeatures
chr9_21353681_21355028_Slc44a2	1.55424	KO	1903	0.571688	0.428312	0.506806	iclipFeatures
chr16_29651628_29654884_Opa1	1.55342	KO	1904	0.522226	0.477774	0.500163	iclipFeatures
chr11_120103950_120104996_Slc38a10	1.55265	KO	1905	0.600887	0.399113	0.471491	iclipFeatures
chr3_88744699_88747699_Syt11	1.5513	KO	1906	0.289	0.711	0.480723	iclipFeatures
chr11_50385776_50386529_Hnrnph1	1.551	KO	1907	0.74654	0.25346	0.52898	iclipFeatures
chr4_45315121_45316131_Trmt10b	1.55056	KO	1908	0.380579	0.619421	0.529894	iclipFeatures
chr7_126851579_126852769_Ino80e	1.55053	KO	1909	0.694364	0.305636	0.504476	iclipFeatures
chr13_63899503_63900302_Ercc6l2	1.55028	KO	1910	0.370943	0.629057	0.504227	iclipFeatures
chr8_27225775_27226528_Adrb3	1.54999	KO	1911	0.370943	0.629057	0.550272	iclipFeatures
chr3_95759872_95763679_Rprd2	1.54963	KO	1912	0.742628	0.257372	0.501624	iclipFeatures
chr11_116537692_116539043_Ube2o	1.54953	KO	1913	0.580834	0.419166	0.491428	iclipFeatures
chr16_38497842_38498932_Timmdc1	1.5491	KO	1914	0.26804	0.73196	0.447998	iclipFeatures
chr11_51791443_51791953_Sar1b	1.54846	KO	1915	0.598401	0.401599	0.486983	iclipFeatures
chr14_99034543_99036489_Mzt1	1.54772	KO	1916	0.749448	0.250552	0.494963	iclipFeatures
chr9_63163767_63164085_Map2k5	1.54664	KO	1917	0.260057	0.739943	0.472923	iclipFeatures
chrX_94273265_94277724_Klhl15	1.54599	KO	1918	0.278626	0.721374	0.467535	iclipFeatures
chr14_32295335_32295649_Parg	1.54493	KO	1919	0.260057	0.739943	0.466737	iclipFeatures
chr11_121306964_121309898_Foxk2	1.5442	KO	1920	0.760794	0.239206	0.432902	iclipFeatures
chr9_49078319_49078773_Zw10	1.54404	KO	1921	0.450752	0.549248	0.43222	iclipFeatures
chr1_105518421_105522003_Pign	1.54353	KO	1922	0.522226	0.477774	0.482367	iclipFeatures
chr2_31214340_31218775_Gpr107	1.54298	KO	1923	0.526951	0.473049	0.500973	iclipFeatures
chr17_28326111_28326574_Fance	1.54162	KO	1924	0.260057	0.739943	0.541125	iclipFeatures
chr9_44509581_44510412_Bcl9l	1.54105	KO	1925	0.260057	0.739943	0.491051	iclipFeatures
chr7_84109354_84110581_Abhd17c	1.54018	KO	1926	0.742628	0.257372	0.520406	iclipFeatures
chr5_88781246_88783281_Dck	1.53944	KO	1927	0.761527	0.238473	0.533561	iclipFeatures
chr6_115840696_115842484_Mbd4	1.53854	KO	1928	0.464681	0.535319	0.556729	iclipFeatures
chr1_58900448_58904120_Trak2	1.53669	KO	1929	0.66158	0.33842	0.580835	iclipFeatures
chr16_35926510_35929298_Dtx3l	1.53641	KO	1930	0.260057	0.739943	0.629973	iclipFeatures
chr7_68226340_68233668_Igf1r	1.53589	KO	1931	0.744299	0.255701	0.630656	iclipFeatures
chr8_78505267_78505545_Rbmxl1	1.53522	KO	1932	0.653771	0.346229	0.580509	iclipFeatures
chr7_131568725_131571898_Bub3	1.53473	KO	1933	0.758638	0.241362	0.584146	iclipFeatures
chr2_120316460_120318033_Vps39	1.53455	KO	1934	0.501113	0.498887	0.557388	iclipFeatures
chr1_58462770_58464224_Orc2	1.53434	KO	1935	0.751442	0.248558	0.557388	iclipFeatures
chr4_135863948_135865818_Srsf10	1.53344	KO	1936	0.749448	0.250552	0.508964	iclipFeatures
chr8_25801947_25803975_Lsm1	1.5327	KO	1937	0.260057	0.739943	0.469592	iclipFeatures
chr17_66336981_66338154_Mtcl1	1.53246	KO	1938	0.501052	0.498948	0.459731	iclipFeatures
chr2_152704621_152708670_H13	1.53158	KO	1939	0.394001	0.605999	0.454326	iclipFeatures
chr4_133591398_133591735_Gpn2	1.53101	KO	1940	0.260057	0.739943	0.4537	iclipFeatures
chr3_88729342_88731048_Rit1	1.53095	KO	1941	0.260057	0.739943	0.454619	iclipFeatures
chr11_69656460_69656727_Sox15	1.53059	KO	1942	0.260057	0.739943	0.503558	iclipFeatures
chr10_128320765_128321358_Pan2	1.52927	KO	1943	0.660026	0.339974	0.528562	iclipFeatures
chr8_70133096_70133751_Nr2c2ap	1.52863	KO	1944	0.447068	0.552932	0.558796	iclipFeatures
chr4_32019533_32023470_Map3k7	1.52826	KO	1945	0.745179	0.254821	0.592777	iclipFeatures
chr5_124886329_124888630_Zfp664	1.52807	KO	1946	0.758638	0.241362	0.623068	iclipFeatures
chrX_38531615_38533632_Cul4b	1.52805	KO	1947	0.749448	0.250552	0.659777	iclipFeatures
chr11_32744529_32746816_Fbxw11	1.52767	KO	1948	0.75109	0.24891	0.643703	iclipFeatures
chr14_20384637_20385361_Dnajc9	1.52753	KO	1949	0.69634	0.30366	0.630652	iclipFeatures
chr9_15260350_15262226_Med17	1.52694	KO	1950	0.599869	0.400131	0.632213	iclipFeatures
chr6_97151949_97155353_Tmf1	1.52677	KO	1951	0.562967	0.437033	0.625978	iclipFeatures
chr17_53506429_53507681_Rab5a	1.52672	KO	1952	0.627149	0.372851	0.626898	iclipFeatures
chr18_10064400_10066047_Rock1	1.5259	KO	1953	0.499287	0.500713	0.611618	iclipFeatures
chr5_131437334_131437584_Auts2	1.52578	KO	1954	0.316553	0.683447	0.617848	iclipFeatures
chr6_113151470_113153435_Setd5	1.52556	KO	1955	0.760794	0.239206	0.584381	iclipFeatures
chr10_58493904_58494175_Ranbp2	1.52549	KO	1956	0.696288	0.303712	0.592493	iclipFeatures
chr5_108106913_108109219_Mtf2	1.52523	KO	1957	0.758638	0.241362	0.573413	iclipFeatures
chr10_120083607_120084811_Helb	1.52488	KO	1958	0.598293	0.401707	0.599564	iclipFeatures
chr9_53614581_53617946_Cul5	1.52418	KO	1959	0.758638	0.241362	0.642853	iclipFeatures
chrX_164070702_164071233_Siah1b	1.52313	KO	1960	0.265201	0.734799	0.642344	iclipFeatures
chr13_95350682_95351501_Aggf1	1.52296	KO	1961	0.644092	0.355908	0.632457	iclipFeatures
chr1_163953753_163954310_BC055324	1.52231	KO	1962	0.436347	0.563653	0.632863	iclipFeatures
chr16_17043685_17047453_Mapk1	1.52175	KO	1963	0.760794	0.239206	0.63196	iclipFeatures
chr17_65848427_65849968_Ralbp1	1.52129	KO	1964	0.749448	0.250552	0.631041	iclipFeatures
chr1_134411079_134411740_Cyb5r1	1.51992	KO	1965	0.755698	0.244302	0.679466	iclipFeatures
chr15_99734880_99736408_Cers5	1.51886	KO	1966	0.597425	0.402575	0.666728	iclipFeatures
chr16_15623896_15624676_Mcm4	1.51851	KO	1967	0.762697	0.237303	0.649099	iclipFeatures
chr5_140340292_140341528_Snx8	1.51721	KO	1968	0.589259	0.410741	0.599227	iclipFeatures
chr12_101039408_101040668_Ppp4r3a	1.51712	KO	1969	0.749448	0.250552	0.583583	iclipFeatures
chr12_101039408_101040668_Smek1	1.51712	KO	1970	0.749448	0.250552	0.583198	iclipFeatures
chr3_90450590_90451119_Npr1	1.51674	KO	1971	0.516713	0.483287	0.589613	iclipFeatures
chr14_26063749_26064539_Tmem254b	1.51643	KO	1972	0.260057	0.739943	0.579288	iclipFeatures
chr14_26063750_26064539_Tmem254c	1.51643	KO	1973	0.26208	0.73792	0.589798	iclipFeatures
chr8_12614276_12615137_Tubgcp3	1.51565	KO	1974	0.593006	0.406994	0.583748	iclipFeatures
chr11_107497544_107498173_Psmd12	1.5153	KO	1975	0.751843	0.248157	0.534809	iclipFeatures
chr14_67014055_67016373_Ppp2r2a	1.5142	KO	1976	0.66158	0.33842	0.509143	iclipFeatures
chrX_73681100_73682502_Slc6a8	1.51412	KO	1977	0.659446	0.340554	0.522538	iclipFeatures
chr2_156091957_156095371_Rbm12	1.5141	KO	1978	0.694364	0.305636	0.571845	iclipFeatures
chr8_94819803_94823193_Ciapin1	1.51392	KO	1979	0.688943	0.311057	0.53855	iclipFeatures
chr11_106155498_106155748_Map3k3	1.51308	KO	1980	0.260057	0.739943	0.523196	iclipFeatures
chr10_104196272_104196522_Gm21312	1.51176	KO	1981	0.260057	0.739943	0.483132	iclipFeatures
chr13_67339305_67342971_Zfp953	1.51153	KO	1982	0.394001	0.605999	0.486952	iclipFeatures
chr8_123461566_123463899_Def8	1.5115	KO	1983	0.755156	0.244844	0.473689	iclipFeatures
chr13_51683381_51684044_Secisbp2	1.51096	KO	1984	0.260057	0.739943	0.430878	iclipFeatures
chr2_144538689_144541995_Polr3f	1.51095	KO	1985	0.598299	0.401701	0.430878	iclipFeatures
chr11_59155368_59158264_Iba57	1.5106	KO	1986	0.26094	0.73906	0.430878	iclipFeatures
chr9_70591575_70592237_Sltm	1.51054	KO	1987	0.697652	0.302348	0.453586	iclipFeatures
chr1_59870485_59879014_Bmpr2	1.5101	KO	1988	0.561725	0.438275	0.45415	iclipFeatures
chr3_90065611_90068347_1700094D03Rik	1.51009	KO	1989	0.260833	0.739167	0.50249	iclipFeatures
chr3_90065611_90068347_4933434E20Rik	1.51009	KO	1990	0.260057	0.739943	0.468743	iclipFeatures
chr9_107564912_107566112_Tusc2	1.5076	KO	1991	0.260057	0.739943	0.468655	iclipFeatures
chr4_88718291_88720148_Klhl9	1.50748	KO	1992	0.62109	0.37891	0.433172	iclipFeatures
chr9_106188625_106191706_Wdr82	1.50687	KO	1993	0.760794	0.239206	0.406868	iclipFeatures
chr16_64762135_64766354_4930453N24Rik	1.50667	KO	1994	0.74345	0.25655	0.40679	iclipFeatures
chr15_102281494_102281751_Mfsd5	1.5063	KO	1995	0.260833	0.739167	0.420387	iclipFeatures
chr5_127595661_127596623_Slc15a4	1.50578	KO	1996	0.260057	0.739943	0.43875	iclipFeatures
chrX_48406088_48408049_Bcorl1	1.50512	KO	1997	0.342825	0.657175	0.4389	iclipFeatures
chr13_73331681_73332179_Mrpl36	1.50466	KO	1998	0.298682	0.701318	0.431812	iclipFeatures
chr10_4367073_4368479_Zbtb2	1.50337	KO	1999	0.260057	0.739943	0.42358	iclipFeatures
[truncated: 4,270 more rows]
