# Supplementary material for: Poised PABP-RNA hubs implement signal-dependent mRNA decay in development
Source: Research Square preprint supplement (doi:10.21203/rs.3.rs-3227673/v1), 2023-08-07
Supplement: Supplementary file 4 [file fea5b25f392c93a4b40c5fd4.xlsx]

## Sheet: pAtails_supplementary
Supplementary Table S5| Table contains mean values of polyA tail length (in nucleotides) for genes in DOWN, Control and UP group, with respect to regulation by phosphorylated LIN28A. Mean polyA tail length was computed by averageing values across all transcripts of a given gene in individual direct RNA sequencing runs. Sequencing runs can be identified by "Replicate" and "Condition" columns. Show…
geneID	Gene Group	Replicate	Condition	mean pAtail length
ENSMUSG00000000088	DOWN	rep1	KO	106.237
ENSMUSG00000000088	DOWN	rep2	KO	109.055
ENSMUSG00000000088	DOWN	rep1	WT	105.056
ENSMUSG00000000088	DOWN	rep2	WT	103.831
ENSMUSG00000000194	CONTROL	rep1	KO	113.525
ENSMUSG00000000194	CONTROL	rep2	KO	136.563
ENSMUSG00000000194	CONTROL	rep1	WT	98.4047
ENSMUSG00000000194	CONTROL	rep2	WT	110.695
ENSMUSG00000000275	CONTROL	rep1	KO	110.772
ENSMUSG00000000275	CONTROL	rep2	KO	126.793
ENSMUSG00000000275	CONTROL	rep1	WT	133.346
ENSMUSG00000000275	CONTROL	rep2	WT	111.201
ENSMUSG00000000295	CONTROL	rep1	KO	105.626
ENSMUSG00000000295	CONTROL	rep2	KO	106.897
ENSMUSG00000000295	CONTROL	rep1	WT	111.754
ENSMUSG00000000295	CONTROL	rep2	WT	107.561
ENSMUSG00000000303	CONTROL	rep1	KO	123.3
ENSMUSG00000000303	CONTROL	rep2	KO	121.407
ENSMUSG00000000303	CONTROL	rep1	WT	107.994
ENSMUSG00000000303	CONTROL	rep2	WT	87.5424
ENSMUSG00000000346	CONTROL	rep1	KO	105.773
ENSMUSG00000000346	CONTROL	rep2	KO	114.112
ENSMUSG00000000346	CONTROL	rep1	WT	119.068
ENSMUSG00000000346	CONTROL	rep2	WT	114.896
ENSMUSG00000000355	CONTROL	rep1	KO	104.225
ENSMUSG00000000355	CONTROL	rep2	KO	111.429
ENSMUSG00000000355	CONTROL	rep1	WT	102.393
ENSMUSG00000000355	CONTROL	rep2	WT	104.417
ENSMUSG00000000378	UP	rep1	KO	119.136
ENSMUSG00000000378	UP	rep2	KO	107.358
ENSMUSG00000000378	UP	rep1	WT	82.0032
ENSMUSG00000000378	UP	rep2	WT	108.736
ENSMUSG00000000420	UP	rep1	KO	104.588
ENSMUSG00000000420	UP	rep2	KO	126.288
ENSMUSG00000000420	UP	rep1	WT	111.271
ENSMUSG00000000420	UP	rep2	WT	110.98
ENSMUSG00000000561	DOWN	rep1	KO	129.785
ENSMUSG00000000561	DOWN	rep2	KO	133.807
ENSMUSG00000000561	DOWN	rep1	WT	123.259
ENSMUSG00000000561	DOWN	rep2	WT	110.497
ENSMUSG00000000787	CONTROL	rep1	KO	123.985
ENSMUSG00000000787	CONTROL	rep2	KO	135.585
ENSMUSG00000000787	CONTROL	rep1	WT	126.624
ENSMUSG00000000787	CONTROL	rep2	WT	129.031
ENSMUSG00000000826	UP	rep1	KO	105.124
ENSMUSG00000000826	UP	rep2	KO	150.135
ENSMUSG00000000826	UP	rep1	WT	123.9
ENSMUSG00000000826	UP	rep2	WT	127.17
ENSMUSG00000000827	CONTROL	rep1	KO	108.448
ENSMUSG00000000827	CONTROL	rep2	KO	114.991
ENSMUSG00000000827	CONTROL	rep1	WT	103.49
ENSMUSG00000000827	CONTROL	rep2	WT	100.953
ENSMUSG00000000959	DOWN	rep1	KO	104.177
ENSMUSG00000000959	DOWN	rep2	KO	116.978
ENSMUSG00000000959	DOWN	rep1	WT	113.342
ENSMUSG00000000959	DOWN	rep2	WT	116.48
ENSMUSG00000001016	CONTROL	rep1	KO	110.783
ENSMUSG00000001016	CONTROL	rep2	KO	114.646
ENSMUSG00000001016	CONTROL	rep1	WT	97.5631
ENSMUSG00000001016	CONTROL	rep2	WT	105.791
ENSMUSG00000001056	CONTROL	rep1	KO	89.8351
ENSMUSG00000001056	CONTROL	rep2	KO	99.6704
ENSMUSG00000001056	CONTROL	rep1	WT	83.3868
ENSMUSG00000001056	CONTROL	rep2	WT	87.5519
ENSMUSG00000001100	CONTROL	rep1	KO	124.171
ENSMUSG00000001100	CONTROL	rep2	KO	97.2878
ENSMUSG00000001100	CONTROL	rep1	WT	79.9943
ENSMUSG00000001100	CONTROL	rep2	WT	98.5677
ENSMUSG00000001175	CONTROL	rep1	KO	92.1066
ENSMUSG00000001175	CONTROL	rep2	KO	102.783
ENSMUSG00000001175	CONTROL	rep1	WT	96.2443
ENSMUSG00000001175	CONTROL	rep2	WT	97.7446
ENSMUSG00000001270	UP	rep1	KO	103.92
ENSMUSG00000001270	UP	rep2	KO	88.1393
ENSMUSG00000001270	UP	rep1	WT	81.8864
ENSMUSG00000001270	UP	rep2	WT	94.7897
ENSMUSG00000001280	CONTROL	rep1	KO	145.62
ENSMUSG00000001280	CONTROL	rep2	KO	142.893
ENSMUSG00000001280	CONTROL	rep1	WT	111.78
ENSMUSG00000001280	CONTROL	rep2	WT	115.332
ENSMUSG00000001305	CONTROL	rep1	KO	82.1444
ENSMUSG00000001305	CONTROL	rep2	KO	90.628
ENSMUSG00000001305	CONTROL	rep1	WT	92.9518
ENSMUSG00000001305	CONTROL	rep2	WT	92.9258
ENSMUSG00000001383	CONTROL	rep1	KO	109.637
ENSMUSG00000001383	CONTROL	rep2	KO	110.582
ENSMUSG00000001383	CONTROL	rep1	WT	99.9634
ENSMUSG00000001383	CONTROL	rep2	WT	100.68
ENSMUSG00000001403	DOWN	rep1	KO	116.958
ENSMUSG00000001403	DOWN	rep2	KO	119.692
ENSMUSG00000001403	DOWN	rep1	WT	103.112
ENSMUSG00000001403	DOWN	rep2	WT	105.784
ENSMUSG00000001415	CONTROL	rep1	KO	136.061
ENSMUSG00000001415	CONTROL	rep2	KO	142.467
ENSMUSG00000001415	CONTROL	rep1	WT	126.642
ENSMUSG00000001415	CONTROL	rep2	WT	139.817
ENSMUSG00000001424	UP	rep1	KO	109.015
ENSMUSG00000001424	UP	rep2	KO	107.975
ENSMUSG00000001424	UP	rep1	WT	107.116
ENSMUSG00000001424	UP	rep2	WT	109.198
ENSMUSG00000001445	DOWN	rep1	KO	109.9
ENSMUSG00000001445	DOWN	rep2	KO	116.843
ENSMUSG00000001445	DOWN	rep1	WT	95.5347
ENSMUSG00000001445	DOWN	rep2	WT	108.037
ENSMUSG00000001472	CONTROL	rep1	KO	100.378
ENSMUSG00000001472	CONTROL	rep2	KO	100.76
ENSMUSG00000001472	CONTROL	rep1	WT	98.6537
ENSMUSG00000001472	CONTROL	rep2	WT	102.921
ENSMUSG00000001473	CONTROL	rep1	KO	84.1387
ENSMUSG00000001473	CONTROL	rep2	KO	93.2332
ENSMUSG00000001473	CONTROL	rep1	WT	103.892
ENSMUSG00000001473	CONTROL	rep2	WT	99.1637
ENSMUSG00000001482	CONTROL	rep1	KO	114.475
ENSMUSG00000001482	CONTROL	rep2	KO	99.3731
ENSMUSG00000001482	CONTROL	rep1	WT	117.474
ENSMUSG00000001482	CONTROL	rep2	WT	112.051
ENSMUSG00000001517	CONTROL	rep1	KO	113.656
ENSMUSG00000001517	CONTROL	rep2	KO	141.144
ENSMUSG00000001517	CONTROL	rep1	WT	111.313
ENSMUSG00000001517	CONTROL	rep2	WT	122.141
ENSMUSG00000001576	UP	rep1	KO	115.114
ENSMUSG00000001576	UP	rep2	KO	135.609
ENSMUSG00000001576	UP	rep1	WT	112.441
ENSMUSG00000001576	UP	rep2	WT	113.462
ENSMUSG00000001785	CONTROL	rep1	KO	91.3987
ENSMUSG00000001785	CONTROL	rep2	KO	112.035
ENSMUSG00000001785	CONTROL	rep1	WT	102.69
ENSMUSG00000001785	CONTROL	rep2	WT	97.8483
ENSMUSG00000001847	CONTROL	rep1	KO	105.76
ENSMUSG00000001847	CONTROL	rep2	KO	104.777
ENSMUSG00000001847	CONTROL	rep1	WT	94.0677
ENSMUSG00000001847	CONTROL	rep2	WT	104.004
ENSMUSG00000001924	CONTROL	rep1	KO	103.798
ENSMUSG00000001924	CONTROL	rep2	KO	117.191
ENSMUSG00000001924	CONTROL	rep1	WT	109.425
ENSMUSG00000001924	CONTROL	rep2	WT	112.894
ENSMUSG00000001962	CONTROL	rep1	KO	101.819
ENSMUSG00000001962	CONTROL	rep2	KO	118.143
ENSMUSG00000001962	CONTROL	rep1	WT	106.321
ENSMUSG00000001962	CONTROL	rep2	WT	110.794
ENSMUSG00000001964	DOWN	rep1	KO	96.1769
ENSMUSG00000001964	DOWN	rep2	KO	130.397
ENSMUSG00000001964	DOWN	rep1	WT	93.3467
ENSMUSG00000001964	DOWN	rep2	WT	103.563
ENSMUSG00000002015	CONTROL	rep1	KO	105.095
ENSMUSG00000002015	CONTROL	rep2	KO	106.813
ENSMUSG00000002015	CONTROL	rep1	WT	99.1824
ENSMUSG00000002015	CONTROL	rep2	WT	112.267
ENSMUSG00000002031	UP	rep1	KO	96.3671
ENSMUSG00000002031	UP	rep2	KO	109.13
ENSMUSG00000002031	UP	rep1	WT	111.944
ENSMUSG00000002031	UP	rep2	WT	99.5757
ENSMUSG00000002059	CONTROL	rep1	KO	92.863
ENSMUSG00000002059	CONTROL	rep2	KO	121.927
ENSMUSG00000002059	CONTROL	rep1	WT	110.564
ENSMUSG00000002059	CONTROL	rep2	WT	106.712
ENSMUSG00000002129	CONTROL	rep1	KO	100.358
ENSMUSG00000002129	CONTROL	rep2	KO	108.617
ENSMUSG00000002129	CONTROL	rep1	WT	111.724
ENSMUSG00000002129	CONTROL	rep2	WT	116.701
ENSMUSG00000002227	DOWN	rep1	KO	119.593
ENSMUSG00000002227	DOWN	rep2	KO	114.216
ENSMUSG00000002227	DOWN	rep1	WT	79.6443
ENSMUSG00000002227	DOWN	rep2	WT	73.337
ENSMUSG00000002233	UP	rep1	KO	122.833
ENSMUSG00000002233	UP	rep2	KO	120.638
ENSMUSG00000002233	UP	rep1	WT	120.254
ENSMUSG00000002233	UP	rep2	WT	112.205
ENSMUSG00000002308	CONTROL	rep1	KO	103.898
ENSMUSG00000002308	CONTROL	rep2	KO	97.5278
ENSMUSG00000002308	CONTROL	rep1	WT	104.901
ENSMUSG00000002308	CONTROL	rep2	WT	99.7231
ENSMUSG00000002345	CONTROL	rep1	KO	102.443
ENSMUSG00000002345	CONTROL	rep2	KO	148.755
ENSMUSG00000002345	CONTROL	rep1	WT	92.9017
ENSMUSG00000002345	CONTROL	rep2	WT	138.116
ENSMUSG00000002372	CONTROL	rep1	KO	101.464
ENSMUSG00000002372	CONTROL	rep2	KO	110.065
ENSMUSG00000002372	CONTROL	rep1	WT	108.323
ENSMUSG00000002372	CONTROL	rep2	WT	106.301
ENSMUSG00000002379	CONTROL	rep1	KO	92.0929
ENSMUSG00000002379	CONTROL	rep2	KO	97.9243
ENSMUSG00000002379	CONTROL	rep1	WT	87.4047
ENSMUSG00000002379	CONTROL	rep2	WT	93.8895
ENSMUSG00000002477	DOWN	rep1	KO	112.164
ENSMUSG00000002477	DOWN	rep2	KO	112.032
ENSMUSG00000002477	DOWN	rep1	WT	111.068
ENSMUSG00000002477	DOWN	rep2	WT	117.989
ENSMUSG00000002660	CONTROL	rep1	KO	108.358
ENSMUSG00000002660	CONTROL	rep2	KO	90.8961
ENSMUSG00000002660	CONTROL	rep1	WT	70.2547
ENSMUSG00000002660	CONTROL	rep2	WT	95.457
ENSMUSG00000002661	CONTROL	rep1	KO	88.6604
ENSMUSG00000002661	CONTROL	rep2	KO	97.5896
ENSMUSG00000002661	CONTROL	rep1	WT	87.7658
ENSMUSG00000002661	CONTROL	rep2	WT	114.844
ENSMUSG00000002718	DOWN	rep1	KO	109.629
ENSMUSG00000002718	DOWN	rep2	KO	113.744
ENSMUSG00000002718	DOWN	rep1	WT	103.061
ENSMUSG00000002718	DOWN	rep2	WT	106.55
ENSMUSG00000002741	CONTROL	rep1	KO	101.068
ENSMUSG00000002741	CONTROL	rep2	KO	120.097
ENSMUSG00000002741	CONTROL	rep1	WT	115.845
ENSMUSG00000002741	CONTROL	rep2	WT	125.547
ENSMUSG00000002748	CONTROL	rep1	KO	99.9127
ENSMUSG00000002748	CONTROL	rep2	KO	126.558
ENSMUSG00000002748	CONTROL	rep1	WT	132.105
ENSMUSG00000002748	CONTROL	rep2	WT	107.074
ENSMUSG00000002778	CONTROL	rep1	KO	105.915
ENSMUSG00000002778	CONTROL	rep2	KO	130.181
ENSMUSG00000002778	CONTROL	rep1	WT	123.525
ENSMUSG00000002778	CONTROL	rep2	WT	112.922
ENSMUSG00000002833	CONTROL	rep1	KO	112.256
ENSMUSG00000002833	CONTROL	rep2	KO	129.889
ENSMUSG00000002833	CONTROL	rep1	WT	100.089
ENSMUSG00000002833	CONTROL	rep2	WT	113.878
ENSMUSG00000002948	DOWN	rep1	KO	137.604
ENSMUSG00000002948	DOWN	rep2	KO	147.73
ENSMUSG00000002948	DOWN	rep1	WT	108.99
ENSMUSG00000002948	DOWN	rep2	WT	115.15
ENSMUSG00000002957	CONTROL	rep1	KO	123.208
ENSMUSG00000002957	CONTROL	rep2	KO	122.152
ENSMUSG00000002957	CONTROL	rep1	WT	132.597
ENSMUSG00000002957	CONTROL	rep2	WT	117.696
ENSMUSG00000002963	CONTROL	rep1	KO	85.3003
ENSMUSG00000002963	CONTROL	rep2	KO	105.185
ENSMUSG00000002963	CONTROL	rep1	WT	103.764
ENSMUSG00000002963	CONTROL	rep2	WT	112.53
ENSMUSG00000003033	CONTROL	rep1	KO	99.8206
ENSMUSG00000003033	CONTROL	rep2	KO	110.38
ENSMUSG00000003033	CONTROL	rep1	WT	113.858
ENSMUSG00000003033	CONTROL	rep2	WT	114.936
ENSMUSG00000003037	CONTROL	rep1	KO	94.4892
ENSMUSG00000003037	CONTROL	rep2	KO	102.473
ENSMUSG00000003037	CONTROL	rep1	WT	104.443
ENSMUSG00000003037	CONTROL	rep2	WT	98.6826
ENSMUSG00000003039	CONTROL	rep1	KO	95.932
ENSMUSG00000003039	CONTROL	rep2	KO	107.307
ENSMUSG00000003039	CONTROL	rep1	WT	95.2145
ENSMUSG00000003039	CONTROL	rep2	WT	97.7009
ENSMUSG00000003235	UP	rep1	KO	93.9386
ENSMUSG00000003235	UP	rep2	KO	123.412
ENSMUSG00000003235	UP	rep1	WT	84.899
ENSMUSG00000003235	UP	rep2	WT	114.149
ENSMUSG00000003299	CONTROL	rep1	KO	87.885
ENSMUSG00000003299	CONTROL	rep2	KO	117.192
ENSMUSG00000003299	CONTROL	rep1	WT	103.224
ENSMUSG00000003299	CONTROL	rep2	WT	103.797
ENSMUSG00000003345	DOWN	rep1	KO	97.9077
ENSMUSG00000003345	DOWN	rep2	KO	109.399
ENSMUSG00000003345	DOWN	rep1	WT	104.795
ENSMUSG00000003345	DOWN	rep2	WT	93.3959
ENSMUSG00000003421	CONTROL	rep1	KO	106.68
ENSMUSG00000003421	CONTROL	rep2	KO	124.425
ENSMUSG00000003421	CONTROL	rep1	WT	118.491
ENSMUSG00000003421	CONTROL	rep2	WT	113.154
ENSMUSG00000003464	CONTROL	rep1	KO	94.0704
ENSMUSG00000003464	CONTROL	rep2	KO	108.27
ENSMUSG00000003464	CONTROL	rep1	WT	104.507
ENSMUSG00000003464	CONTROL	rep2	WT	121.2
ENSMUSG00000003824	DOWN	rep1	KO	91.3243
ENSMUSG00000003824	DOWN	rep2	KO	107.45
ENSMUSG00000003824	DOWN	rep1	WT	78.708
ENSMUSG00000003824	DOWN	rep2	WT	82.2411
ENSMUSG00000004069	DOWN	rep1	KO	93.8054
ENSMUSG00000004069	DOWN	rep2	KO	117.613
ENSMUSG00000004069	DOWN	rep1	WT	106.319
ENSMUSG00000004069	DOWN	rep2	WT	115.912
ENSMUSG00000004100	CONTROL	rep1	KO	121.123
ENSMUSG00000004100	CONTROL	rep2	KO	131.882
ENSMUSG00000004100	CONTROL	rep1	WT	103.752
ENSMUSG00000004100	CONTROL	rep2	WT	115.754
ENSMUSG00000004127	UP	rep1	KO	132.471
ENSMUSG00000004127	UP	rep2	KO	94.4129
ENSMUSG00000004127	UP	rep1	WT	117.211
ENSMUSG00000004127	UP	rep2	WT	113.815
ENSMUSG00000004264	DOWN	rep1	KO	83.8304
ENSMUSG00000004264	DOWN	rep2	KO	86.4829
ENSMUSG00000004264	DOWN	rep1	WT	68.6465
ENSMUSG00000004264	DOWN	rep2	WT	78.3047
ENSMUSG00000004270	UP	rep1	KO	96.7921
ENSMUSG00000004270	UP	rep2	KO	101.358
ENSMUSG00000004270	UP	rep1	WT	84.7508
ENSMUSG00000004270	UP	rep2	WT	104.213
ENSMUSG00000004535	CONTROL	rep1	KO	98.6576
ENSMUSG00000004535	CONTROL	rep2	KO	100.829
ENSMUSG00000004535	CONTROL	rep1	WT	96.9712
ENSMUSG00000004535	CONTROL	rep2	WT	106.183
ENSMUSG00000004642	DOWN	rep1	KO	101.582
ENSMUSG00000004642	DOWN	rep2	KO	125.562
ENSMUSG00000004642	DOWN	rep1	WT	115.252
ENSMUSG00000004642	DOWN	rep2	WT	124.332
ENSMUSG00000004789	CONTROL	rep1	KO	107.763
ENSMUSG00000004789	CONTROL	rep2	KO	107.293
ENSMUSG00000004789	CONTROL	rep1	WT	96.4329
ENSMUSG00000004789	CONTROL	rep2	WT	110.097
ENSMUSG00000004897	DOWN	rep1	KO	106.522
ENSMUSG00000004897	DOWN	rep2	KO	103.873
ENSMUSG00000004897	DOWN	rep1	WT	85.8326
ENSMUSG00000004897	DOWN	rep2	WT	94.346
ENSMUSG00000004929	UP	rep1	KO	121.275
ENSMUSG00000004929	UP	rep2	KO	122.184
ENSMUSG00000004929	UP	rep1	WT	109.412
ENSMUSG00000004929	UP	rep2	WT	112.857
ENSMUSG00000005054	CONTROL	rep1	KO	110.923
ENSMUSG00000005054	CONTROL	rep2	KO	110.735
ENSMUSG00000005054	CONTROL	rep1	WT	117.483
ENSMUSG00000005054	CONTROL	rep2	WT	121.711
ENSMUSG00000005142	CONTROL	rep1	KO	101.096
ENSMUSG00000005142	CONTROL	rep2	KO	108.846
ENSMUSG00000005142	CONTROL	rep1	WT	85.1753
ENSMUSG00000005142	CONTROL	rep2	WT	115.676
ENSMUSG00000005204	CONTROL	rep1	KO	113.883
ENSMUSG00000005204	CONTROL	rep2	KO	123.676
ENSMUSG00000005204	CONTROL	rep1	WT	109.549
ENSMUSG00000005204	CONTROL	rep2	WT	122.191
ENSMUSG00000005371	CONTROL	rep1	KO	101.005
ENSMUSG00000005371	CONTROL	rep2	KO	94.0147
ENSMUSG00000005371	CONTROL	rep1	WT	90.4119
ENSMUSG00000005371	CONTROL	rep2	WT	109.861
ENSMUSG00000005410	CONTROL	rep1	KO	92.3137
ENSMUSG00000005410	CONTROL	rep2	KO	95.8318
ENSMUSG00000005410	CONTROL	rep1	WT	94.3354
ENSMUSG00000005410	CONTROL	rep2	WT	100.861
ENSMUSG00000005413	CONTROL	rep1	KO	99.9363
ENSMUSG00000005413	CONTROL	rep2	KO	110.597
ENSMUSG00000005413	CONTROL	rep1	WT	115.069
ENSMUSG00000005413	CONTROL	rep2	WT	107.516
ENSMUSG00000005442	UP	rep1	KO	121.794
ENSMUSG00000005442	UP	rep2	KO	166.135
ENSMUSG00000005442	UP	rep1	WT	131.972
ENSMUSG00000005442	UP	rep2	WT	145.659
ENSMUSG00000005470	DOWN	rep1	KO	99.5812
ENSMUSG00000005470	DOWN	rep2	KO	104.734
ENSMUSG00000005470	DOWN	rep1	WT	111.609
ENSMUSG00000005470	DOWN	rep2	WT	102.847
ENSMUSG00000005481	DOWN	rep1	KO	112.031
ENSMUSG00000005481	DOWN	rep2	KO	111.899
ENSMUSG00000005481	DOWN	rep1	WT	104.932
ENSMUSG00000005481	DOWN	rep2	WT	108.086
ENSMUSG00000005483	CONTROL	rep1	KO	96.0879
ENSMUSG00000005483	CONTROL	rep2	KO	98.3535
ENSMUSG00000005483	CONTROL	rep1	WT	97.4947
ENSMUSG00000005483	CONTROL	rep2	WT	108.077
ENSMUSG00000005506	CONTROL	rep1	KO	134.868
ENSMUSG00000005506	CONTROL	rep2	KO	127.052
ENSMUSG00000005506	CONTROL	rep1	WT	126.803
ENSMUSG00000005506	CONTROL	rep2	WT	127.411
ENSMUSG00000005566	DOWN	rep1	KO	115.001
ENSMUSG00000005566	DOWN	rep2	KO	123.719
ENSMUSG00000005566	DOWN	rep1	WT	100.17
ENSMUSG00000005566	DOWN	rep2	WT	106.82
ENSMUSG00000005674	DOWN	rep1	KO	88.0691
ENSMUSG00000005674	DOWN	rep2	KO	132.59
ENSMUSG00000005674	DOWN	rep1	WT	99.4764
ENSMUSG00000005674	DOWN	rep2	WT	103.71
ENSMUSG00000005687	DOWN	rep1	KO	117.645
ENSMUSG00000005687	DOWN	rep2	KO	121.45
ENSMUSG00000005687	DOWN	rep1	WT	108.509
ENSMUSG00000005687	DOWN	rep2	WT	110.192
ENSMUSG00000005698	CONTROL	rep1	KO	102.752
ENSMUSG00000005698	CONTROL	rep2	KO	120.908
ENSMUSG00000005698	CONTROL	rep1	WT	115.942
ENSMUSG00000005698	CONTROL	rep2	WT	117.192
ENSMUSG00000005881	UP	rep1	KO	109.341
ENSMUSG00000005881	UP	rep2	KO	129.127
ENSMUSG00000005881	UP	rep1	WT	111.022
ENSMUSG00000005881	UP	rep2	WT	99.5589
ENSMUSG00000005899	DOWN	rep1	KO	108.487
ENSMUSG00000005899	DOWN	rep2	KO	113.503
ENSMUSG00000005899	DOWN	rep1	WT	106.941
ENSMUSG00000005899	DOWN	rep2	WT	106.589
ENSMUSG00000005982	CONTROL	rep1	KO	101.821
ENSMUSG00000005982	CONTROL	rep2	KO	112.61
ENSMUSG00000005982	CONTROL	rep1	WT	107.813
ENSMUSG00000005982	CONTROL	rep2	WT	116.763
ENSMUSG00000006024	CONTROL	rep1	KO	116.61
ENSMUSG00000006024	CONTROL	rep2	KO	101
ENSMUSG00000006024	CONTROL	rep1	WT	112.275
ENSMUSG00000006024	CONTROL	rep2	WT	104.464
ENSMUSG00000006058	DOWN	rep1	KO	90.2552
ENSMUSG00000006058	DOWN	rep2	KO	94.6878
ENSMUSG00000006058	DOWN	rep1	WT	83.494
ENSMUSG00000006058	DOWN	rep2	WT	79.9897
ENSMUSG00000006169	CONTROL	rep1	KO	112.2
ENSMUSG00000006169	CONTROL	rep2	KO	124.817
ENSMUSG00000006169	CONTROL	rep1	WT	113.601
ENSMUSG00000006169	CONTROL	rep2	WT	115.725
ENSMUSG00000006273	DOWN	rep1	KO	108.654
ENSMUSG00000006273	DOWN	rep2	KO	100.214
ENSMUSG00000006273	DOWN	rep1	WT	103.811
ENSMUSG00000006273	DOWN	rep2	WT	116.234
ENSMUSG00000006304	UP	rep1	KO	95.7812
ENSMUSG00000006304	UP	rep2	KO	84.4432
ENSMUSG00000006304	UP	rep1	WT	97.0845
ENSMUSG00000006304	UP	rep2	WT	121.6
ENSMUSG00000006356	UP	rep1	KO	94.1595
ENSMUSG00000006356	UP	rep2	KO	116.329
ENSMUSG00000006356	UP	rep1	WT	103.451
ENSMUSG00000006356	UP	rep2	WT	122.155
ENSMUSG00000006360	CONTROL	rep1	KO	115.928
ENSMUSG00000006360	CONTROL	rep2	KO	118.094
ENSMUSG00000006360	CONTROL	rep1	WT	88.3369
ENSMUSG00000006360	CONTROL	rep2	WT	106.393
ENSMUSG00000006373	DOWN	rep1	KO	105.618
ENSMUSG00000006373	DOWN	rep2	KO	100.193
ENSMUSG00000006373	DOWN	rep1	WT	102.789
ENSMUSG00000006373	DOWN	rep2	WT	100.234
ENSMUSG00000006378	UP	rep1	KO	98.1976
ENSMUSG00000006378	UP	rep2	KO	88.0814
ENSMUSG00000006378	UP	rep1	WT	87.8804
ENSMUSG00000006378	UP	rep2	WT	93.3281
ENSMUSG00000006392	CONTROL	rep1	KO	94.8805
ENSMUSG00000006392	CONTROL	rep2	KO	108.383
ENSMUSG00000006392	CONTROL	rep1	WT	91.8693
ENSMUSG00000006392	CONTROL	rep2	WT	88.6779
ENSMUSG00000006412	CONTROL	rep1	KO	102.628
ENSMUSG00000006412	CONTROL	rep2	KO	101.444
ENSMUSG00000006412	CONTROL	rep1	WT	91.9818
ENSMUSG00000006412	CONTROL	rep2	WT	101.712
ENSMUSG00000006442	CONTROL	rep1	KO	108.862
ENSMUSG00000006442	CONTROL	rep2	KO	111.763
ENSMUSG00000006442	CONTROL	rep1	WT	88.5828
ENSMUSG00000006442	CONTROL	rep2	WT	87.1583
ENSMUSG00000006494	DOWN	rep1	KO	113.254
ENSMUSG00000006494	DOWN	rep2	KO	118.91
ENSMUSG00000006494	DOWN	rep1	WT	105.543
ENSMUSG00000006494	DOWN	rep2	WT	125.278
ENSMUSG00000006498	CONTROL	rep1	KO	105.024
ENSMUSG00000006498	CONTROL	rep2	KO	116.88
ENSMUSG00000006498	CONTROL	rep1	WT	108.733
ENSMUSG00000006498	CONTROL	rep2	WT	108.681
ENSMUSG00000006585	DOWN	rep1	KO	112.442
ENSMUSG00000006585	DOWN	rep2	KO	123.727
ENSMUSG00000006585	DOWN	rep1	WT	104.532
ENSMUSG00000006585	DOWN	rep2	WT	110.785
ENSMUSG00000006599	DOWN	rep1	KO	97.6674
ENSMUSG00000006599	DOWN	rep2	KO	111.366
ENSMUSG00000006599	DOWN	rep1	WT	95.3291
ENSMUSG00000006599	DOWN	rep2	WT	103.38
ENSMUSG00000006673	CONTROL	rep1	KO	115.431
ENSMUSG00000006673	CONTROL	rep2	KO	123.615
ENSMUSG00000006673	CONTROL	rep1	WT	137.399
ENSMUSG00000006673	CONTROL	rep2	WT	123.111
ENSMUSG00000006732	CONTROL	rep1	KO	114.229
ENSMUSG00000006732	CONTROL	rep2	KO	117.094
ENSMUSG00000006732	CONTROL	rep1	WT	104.218
ENSMUSG00000006732	CONTROL	rep2	WT	107.634
ENSMUSG00000006818	DOWN	rep1	KO	101.583
ENSMUSG00000006818	DOWN	rep2	KO	110.965
ENSMUSG00000006818	DOWN	rep1	WT	86.117
ENSMUSG00000006818	DOWN	rep2	WT	88.3288
ENSMUSG00000006932	CONTROL	rep1	KO	120.379
ENSMUSG00000006932	CONTROL	rep2	KO	125.149
ENSMUSG00000006932	CONTROL	rep1	WT	113.955
ENSMUSG00000006932	CONTROL	rep2	WT	123.411
ENSMUSG00000006941	CONTROL	rep1	KO	132.952
ENSMUSG00000006941	CONTROL	rep2	KO	116.569
ENSMUSG00000006941	CONTROL	rep1	WT	106.345
ENSMUSG00000006941	CONTROL	rep2	WT	130.45
ENSMUSG00000006998	CONTROL	rep1	KO	100.679
ENSMUSG00000006998	CONTROL	rep2	KO	107.517
ENSMUSG00000006998	CONTROL	rep1	WT	112.938
ENSMUSG00000006998	CONTROL	rep2	WT	109.577
ENSMUSG00000007039	CONTROL	rep1	KO	86.5832
ENSMUSG00000007039	CONTROL	rep2	KO	91.4861
ENSMUSG00000007039	CONTROL	rep1	WT	104.568
ENSMUSG00000007039	CONTROL	rep2	WT	97.913
ENSMUSG00000007041	UP	rep1	KO	107.75
ENSMUSG00000007041	UP	rep2	KO	116.095
ENSMUSG00000007041	UP	rep1	WT	109.394
ENSMUSG00000007041	UP	rep2	WT	114.78
ENSMUSG00000007050	CONTROL	rep1	KO	131.383
ENSMUSG00000007050	CONTROL	rep2	KO	129.76
ENSMUSG00000007050	CONTROL	rep1	WT	111.284
ENSMUSG00000007050	CONTROL	rep2	WT	119.808
ENSMUSG00000007411	UP	rep1	KO	127.197
ENSMUSG00000007411	UP	rep2	KO	143.357
ENSMUSG00000007411	UP	rep1	WT	134.09
ENSMUSG00000007411	UP	rep2	WT	126.386
ENSMUSG00000007458	DOWN	rep1	KO	90.6536
ENSMUSG00000007458	DOWN	rep2	KO	110.415
ENSMUSG00000007458	DOWN	rep1	WT	87.2194
ENSMUSG00000007458	DOWN	rep2	WT	98.0218
ENSMUSG00000007564	CONTROL	rep1	KO	115.383
ENSMUSG00000007564	CONTROL	rep2	KO	116.288
ENSMUSG00000007564	CONTROL	rep1	WT	113.494
ENSMUSG00000007564	CONTROL	rep2	WT	118.139
ENSMUSG00000007610	DOWN	rep1	KO	134.155
ENSMUSG00000007610	DOWN	rep2	KO	132.412
ENSMUSG00000007610	DOWN	rep1	WT	113.762
ENSMUSG00000007610	DOWN	rep2	WT	104.896
ENSMUSG00000007739	DOWN	rep1	KO	95.3619
ENSMUSG00000007739	DOWN	rep2	KO	95.8654
ENSMUSG00000007739	DOWN	rep1	WT	93.934
ENSMUSG00000007739	DOWN	rep2	WT	95.2279
ENSMUSG00000007815	CONTROL	rep1	KO	95.9967
ENSMUSG00000007815	CONTROL	rep2	KO	101.456
ENSMUSG00000007815	CONTROL	rep1	WT	97.945
ENSMUSG00000007815	CONTROL	rep2	WT	102.558
ENSMUSG00000007833	CONTROL	rep1	KO	115.664
ENSMUSG00000007833	CONTROL	rep2	KO	81.2921
ENSMUSG00000007833	CONTROL	rep1	WT	116.612
ENSMUSG00000007833	CONTROL	rep2	WT	104.696
ENSMUSG00000008035	DOWN	rep1	KO	98.6888
ENSMUSG00000008035	DOWN	rep2	KO	113.159
ENSMUSG00000008035	DOWN	rep1	WT	82.0126
ENSMUSG00000008035	DOWN	rep2	WT	127.07
ENSMUSG00000008036	UP	rep1	KO	108.673
ENSMUSG00000008036	UP	rep2	KO	107.678
ENSMUSG00000008036	UP	rep1	WT	119.411
ENSMUSG00000008036	UP	rep2	WT	118.399
ENSMUSG00000008206	CONTROL	rep1	KO	122.997
ENSMUSG00000008206	CONTROL	rep2	KO	117.598
ENSMUSG00000008206	CONTROL	rep1	WT	107.462
ENSMUSG00000008206	CONTROL	rep2	WT	128.931
ENSMUSG00000008301	CONTROL	rep1	KO	84.8227
ENSMUSG00000008301	CONTROL	rep2	KO	100.173
ENSMUSG00000008301	CONTROL	rep1	WT	95.7829
ENSMUSG00000008301	CONTROL	rep2	WT	87.4809
ENSMUSG00000008373	CONTROL	rep1	KO	119.764
ENSMUSG00000008373	CONTROL	rep2	KO	112.271
ENSMUSG00000008373	CONTROL	rep1	WT	100.493
ENSMUSG00000008373	CONTROL	rep2	WT	100.882
ENSMUSG00000008604	CONTROL	rep1	KO	107.76
ENSMUSG00000008604	CONTROL	rep2	KO	128.225
ENSMUSG00000008604	CONTROL	rep1	WT	102.717
ENSMUSG00000008604	CONTROL	rep2	WT	110.779
ENSMUSG00000008690	CONTROL	rep1	KO	129.87
ENSMUSG00000008690	CONTROL	rep2	KO	124.725
ENSMUSG00000008690	CONTROL	rep1	WT	96.1376
ENSMUSG00000008690	CONTROL	rep2	WT	111.31
ENSMUSG00000008958	CONTROL	rep1	KO	90.9233
ENSMUSG00000008958	CONTROL	rep2	KO	102.167
ENSMUSG00000008958	CONTROL	rep1	WT	102.163
ENSMUSG00000008958	CONTROL	rep2	WT	100.311
ENSMUSG00000009090	UP	rep1	KO	121.6
ENSMUSG00000009090	UP	rep2	KO	103.892
ENSMUSG00000009090	UP	rep1	WT	103.948
ENSMUSG00000009090	UP	rep2	WT	136.435
ENSMUSG00000009291	UP	rep1	KO	94.5223
ENSMUSG00000009291	UP	rep2	KO	130.303
ENSMUSG00000009291	UP	rep1	WT	125.05
ENSMUSG00000009291	UP	rep2	WT	111.886
ENSMUSG00000009535	DOWN	rep1	KO	108.053
ENSMUSG00000009535	DOWN	rep2	KO	132.602
ENSMUSG00000009535	DOWN	rep1	WT	114.159
ENSMUSG00000009535	DOWN	rep2	WT	115.906
ENSMUSG00000009555	DOWN	rep1	KO	104.476
ENSMUSG00000009555	DOWN	rep2	KO	103.61
ENSMUSG00000009555	DOWN	rep1	WT	98.7195
ENSMUSG00000009555	DOWN	rep2	WT	103.096
ENSMUSG00000009563	CONTROL	rep1	KO	113.446
ENSMUSG00000009563	CONTROL	rep2	KO	109.998
ENSMUSG00000009563	CONTROL	rep1	WT	121.443
ENSMUSG00000009563	CONTROL	rep2	WT	140.16
ENSMUSG00000010047	DOWN	rep1	KO	102.395
ENSMUSG00000010047	DOWN	rep2	KO	93.1463
ENSMUSG00000010047	DOWN	rep1	WT	82.8256
ENSMUSG00000010047	DOWN	rep2	WT	109.168
ENSMUSG00000010048	CONTROL	rep1	KO	107.137
ENSMUSG00000010048	CONTROL	rep2	KO	123.346
ENSMUSG00000010048	CONTROL	rep1	WT	110.447
ENSMUSG00000010048	CONTROL	rep2	WT	98.5732
ENSMUSG00000010277	DOWN	rep1	KO	95.0579
ENSMUSG00000010277	DOWN	rep2	KO	131.605
ENSMUSG00000010277	DOWN	rep1	WT	97.815
ENSMUSG00000010277	DOWN	rep2	WT	100.248
ENSMUSG00000010362	CONTROL	rep1	KO	70.9097
ENSMUSG00000010362	CONTROL	rep2	KO	93.0915
ENSMUSG00000010362	CONTROL	rep1	WT	110.243
ENSMUSG00000010362	CONTROL	rep2	WT	97.9179
ENSMUSG00000011096	CONTROL	rep1	KO	96.1637
ENSMUSG00000011096	CONTROL	rep2	KO	106.884
ENSMUSG00000011096	CONTROL	rep1	WT	108.06
ENSMUSG00000011096	CONTROL	rep2	WT	91.5892
ENSMUSG00000011179	DOWN	rep1	KO	103.518
ENSMUSG00000011179	DOWN	rep2	KO	107.44
ENSMUSG00000011179	DOWN	rep1	WT	91.5196
ENSMUSG00000011179	DOWN	rep2	WT	93.9698
ENSMUSG00000011256	DOWN	rep1	KO	140.13
ENSMUSG00000011256	DOWN	rep2	KO	149.769
ENSMUSG00000011256	DOWN	rep1	WT	116.787
ENSMUSG00000011256	DOWN	rep2	WT	143.518
ENSMUSG00000011837	CONTROL	rep1	KO	103.529
ENSMUSG00000011837	CONTROL	rep2	KO	92.594
ENSMUSG00000011837	CONTROL	rep1	WT	111.645
ENSMUSG00000011837	CONTROL	rep2	WT	98.3503
ENSMUSG00000011877	CONTROL	rep1	KO	114.81
ENSMUSG00000011877	CONTROL	rep2	KO	124.524
ENSMUSG00000011877	CONTROL	rep1	WT	122.598
ENSMUSG00000011877	CONTROL	rep2	WT	111.32
ENSMUSG00000011958	CONTROL	rep1	KO	111.313
ENSMUSG00000011958	CONTROL	rep2	KO	108.399
ENSMUSG00000011958	CONTROL	rep1	WT	104.475
ENSMUSG00000011958	CONTROL	rep2	WT	125.939
ENSMUSG00000012396	DOWN	rep1	KO	93.6442
ENSMUSG00000012396	DOWN	rep2	KO	117.835
ENSMUSG00000012396	DOWN	rep1	WT	119.596
ENSMUSG00000012396	DOWN	rep2	WT	113.666
ENSMUSG00000013089	CONTROL	rep1	KO	102.497
ENSMUSG00000013089	CONTROL	rep2	KO	122.9
ENSMUSG00000013089	CONTROL	rep1	WT	109.086
ENSMUSG00000013089	CONTROL	rep2	WT	114.043
ENSMUSG00000013629	CONTROL	rep1	KO	107.554
ENSMUSG00000013629	CONTROL	rep2	KO	115.579
ENSMUSG00000013629	CONTROL	rep1	WT	94.472
ENSMUSG00000013629	CONTROL	rep2	WT	113.885
ENSMUSG00000013736	DOWN	rep1	KO	115.784
ENSMUSG00000013736	DOWN	rep2	KO	125.595
ENSMUSG00000013736	DOWN	rep1	WT	100.119
ENSMUSG00000013736	DOWN	rep2	WT	102.455
ENSMUSG00000013973	CONTROL	rep1	KO	112.232
ENSMUSG00000013973	CONTROL	rep2	KO	113.059
ENSMUSG00000013973	CONTROL	rep1	WT	109.76
ENSMUSG00000013973	CONTROL	rep2	WT	114.987
ENSMUSG00000014226	CONTROL	rep1	KO	92.5596
ENSMUSG00000014226	CONTROL	rep2	KO	115.735
ENSMUSG00000014226	CONTROL	rep1	WT	92.6866
ENSMUSG00000014226	CONTROL	rep2	WT	107.216
ENSMUSG00000014856	CONTROL	rep1	KO	115.597
ENSMUSG00000014856	CONTROL	rep2	KO	132.378
ENSMUSG00000014856	CONTROL	rep1	WT	107.214
ENSMUSG00000014856	CONTROL	rep2	WT	125.263
ENSMUSG00000014859	DOWN	rep1	KO	130.035
ENSMUSG00000014859	DOWN	rep2	KO	120.917
ENSMUSG00000014859	DOWN	rep1	WT	104.033
ENSMUSG00000014859	DOWN	rep2	WT	114.735
ENSMUSG00000014907	CONTROL	rep1	KO	118.56
ENSMUSG00000014907	CONTROL	rep2	KO	108.957
ENSMUSG00000014907	CONTROL	rep1	WT	109.074
ENSMUSG00000014907	CONTROL	rep2	WT	96.889
ENSMUSG00000014956	DOWN	rep1	KO	121.075
ENSMUSG00000014956	DOWN	rep2	KO	119.146
ENSMUSG00000014956	DOWN	rep1	WT	119.332
ENSMUSG00000014956	DOWN	rep2	WT	122.817
ENSMUSG00000014959	CONTROL	rep1	KO	77.7905
ENSMUSG00000014959	CONTROL	rep2	KO	99.4787
ENSMUSG00000014959	CONTROL	rep1	WT	107.118
ENSMUSG00000014959	CONTROL	rep2	WT	105.814
ENSMUSG00000015092	UP	rep1	KO	83.1567
ENSMUSG00000015092	UP	rep2	KO	92.3146
ENSMUSG00000015092	UP	rep1	WT	94.0887
ENSMUSG00000015092	UP	rep2	WT	89.2081
ENSMUSG00000015126	CONTROL	rep1	KO	139.46
ENSMUSG00000015126	CONTROL	rep2	KO	118.503
ENSMUSG00000015126	CONTROL	rep1	WT	82.7406
ENSMUSG00000015126	CONTROL	rep2	WT	124.191
ENSMUSG00000015176	CONTROL	rep1	KO	100.633
ENSMUSG00000015176	CONTROL	rep2	KO	100.718
ENSMUSG00000015176	CONTROL	rep1	WT	88.4854
ENSMUSG00000015176	CONTROL	rep2	WT	94.8754
ENSMUSG00000015461	CONTROL	rep1	KO	144.821
ENSMUSG00000015461	CONTROL	rep2	KO	153.544
ENSMUSG00000015461	CONTROL	rep1	WT	120.099
ENSMUSG00000015461	CONTROL	rep2	WT	148.96
ENSMUSG00000015536	CONTROL	rep1	KO	84.8205
ENSMUSG00000015536	CONTROL	rep2	KO	118.67
ENSMUSG00000015536	CONTROL	rep1	WT	118.195
ENSMUSG00000015536	CONTROL	rep2	WT	130.567
ENSMUSG00000015575	CONTROL	rep1	KO	100.822
ENSMUSG00000015575	CONTROL	rep2	KO	104.903
ENSMUSG00000015575	CONTROL	rep1	WT	106.174
ENSMUSG00000015575	CONTROL	rep2	WT	106.902
ENSMUSG00000015748	CONTROL	rep1	KO	82.8365
ENSMUSG00000015748	CONTROL	rep2	KO	114.53
ENSMUSG00000015748	CONTROL	rep1	WT	80.1222
ENSMUSG00000015748	CONTROL	rep2	WT	105.147
ENSMUSG00000015749	DOWN	rep1	KO	115.994
ENSMUSG00000015749	DOWN	rep2	KO	114.284
ENSMUSG00000015749	DOWN	rep1	WT	106.124
ENSMUSG00000015749	DOWN	rep2	WT	124.219
ENSMUSG00000015932	CONTROL	rep1	KO	104.449
ENSMUSG00000015932	CONTROL	rep2	KO	108.718
ENSMUSG00000015932	CONTROL	rep1	WT	99.6387
ENSMUSG00000015932	CONTROL	rep2	WT	101.284
ENSMUSG00000016253	UP	rep1	KO	121.129
ENSMUSG00000016253	UP	rep2	KO	129.129
ENSMUSG00000016253	UP	rep1	WT	108.596
ENSMUSG00000016253	UP	rep2	WT	132.825
ENSMUSG00000016308	CONTROL	rep1	KO	98.1849
ENSMUSG00000016308	CONTROL	rep2	KO	100.102
ENSMUSG00000016308	CONTROL	rep1	WT	102.841
ENSMUSG00000016308	CONTROL	rep2	WT	108.809
ENSMUSG00000016344	DOWN	rep1	KO	132.836
ENSMUSG00000016344	DOWN	rep2	KO	109.76
ENSMUSG00000016344	DOWN	rep1	WT	117.566
ENSMUSG00000016344	DOWN	rep2	WT	100.998
ENSMUSG00000016487	UP	rep1	KO	122.716
ENSMUSG00000016487	UP	rep2	KO	126.592
ENSMUSG00000016487	UP	rep1	WT	101.632
ENSMUSG00000016487	UP	rep2	WT	119.534
ENSMUSG00000016541	UP	rep1	KO	101.958
ENSMUSG00000016541	UP	rep2	KO	125.291
ENSMUSG00000016541	UP	rep1	WT	109.268
ENSMUSG00000016541	UP	rep2	WT	118.322
ENSMUSG00000016619	CONTROL	rep1	KO	75.1291
ENSMUSG00000016619	CONTROL	rep2	KO	106.064
ENSMUSG00000016619	CONTROL	rep1	WT	101.222
ENSMUSG00000016619	CONTROL	rep2	WT	105.38
ENSMUSG00000016921	DOWN	rep1	KO	126.259
ENSMUSG00000016921	DOWN	rep2	KO	137.613
ENSMUSG00000016921	DOWN	rep1	WT	125.177
ENSMUSG00000016921	DOWN	rep2	WT	139.028
ENSMUSG00000017421	CONTROL	rep1	KO	92.4231
ENSMUSG00000017421	CONTROL	rep2	KO	111.874
ENSMUSG00000017421	CONTROL	rep1	WT	105.918
ENSMUSG00000017421	CONTROL	rep2	WT	116.369
ENSMUSG00000017428	DOWN	rep1	KO	101.233
ENSMUSG00000017428	DOWN	rep2	KO	123.363
ENSMUSG00000017428	DOWN	rep1	WT	105.101
ENSMUSG00000017428	DOWN	rep2	WT	105.258
ENSMUSG00000017716	DOWN	rep1	KO	104.635
ENSMUSG00000017716	DOWN	rep2	KO	108.169
ENSMUSG00000017716	DOWN	rep1	WT	116.271
ENSMUSG00000017716	DOWN	rep2	WT	113.232
ENSMUSG00000017721	UP	rep1	KO	112.537
ENSMUSG00000017721	UP	rep2	KO	116.102
ENSMUSG00000017721	UP	rep1	WT	132.777
ENSMUSG00000017721	UP	rep2	WT	124.379
ENSMUSG00000017764	CONTROL	rep1	KO	78.81
ENSMUSG00000017764	CONTROL	rep2	KO	93.6866
ENSMUSG00000017764	CONTROL	rep1	WT	95.1717
ENSMUSG00000017764	CONTROL	rep2	WT	113.91
ENSMUSG00000017781	CONTROL	rep1	KO	129.807
ENSMUSG00000017781	CONTROL	rep2	KO	131.89
ENSMUSG00000017781	CONTROL	rep1	WT	103.093
ENSMUSG00000017781	CONTROL	rep2	WT	104.032
ENSMUSG00000017837	UP	rep1	KO	110.1
ENSMUSG00000017837	UP	rep2	KO	130.467
ENSMUSG00000017837	UP	rep1	WT	134.612
ENSMUSG00000017837	UP	rep2	WT	111.633
ENSMUSG00000017843	CONTROL	rep1	KO	115.702
ENSMUSG00000017843	CONTROL	rep2	KO	121.032
ENSMUSG00000017843	CONTROL	rep1	WT	103.981
ENSMUSG00000017843	CONTROL	rep2	WT	102.264
ENSMUSG00000017999	CONTROL	rep1	KO	109.813
ENSMUSG00000017999	CONTROL	rep2	KO	117.195
ENSMUSG00000017999	CONTROL	rep1	WT	87.5481
ENSMUSG00000017999	CONTROL	rep2	WT	96.9257
ENSMUSG00000018239	CONTROL	rep1	KO	127.468
ENSMUSG00000018239	CONTROL	rep2	KO	106.194
ENSMUSG00000018239	CONTROL	rep1	WT	125.528
ENSMUSG00000018239	CONTROL	rep2	WT	117.588
ENSMUSG00000018326	UP	rep1	KO	88.2493
ENSMUSG00000018326	UP	rep2	KO	108.282
ENSMUSG00000018326	UP	rep1	WT	98.6748
ENSMUSG00000018326	UP	rep2	WT	103.514
ENSMUSG00000018379	DOWN	rep1	KO	102.635
ENSMUSG00000018379	DOWN	rep2	KO	108.203
ENSMUSG00000018379	DOWN	rep1	WT	99.9841
ENSMUSG00000018379	DOWN	rep2	WT	109.487
ENSMUSG00000018548	CONTROL	rep1	KO	100.709
ENSMUSG00000018548	CONTROL	rep2	KO	110.088
ENSMUSG00000018548	CONTROL	rep1	WT	85.2129
ENSMUSG00000018548	CONTROL	rep2	WT	100.341
ENSMUSG00000018572	CONTROL	rep1	KO	103.026
ENSMUSG00000018572	CONTROL	rep2	KO	102.009
ENSMUSG00000018572	CONTROL	rep1	WT	85.3579
ENSMUSG00000018572	CONTROL	rep2	WT	111.042
ENSMUSG00000018583	DOWN	rep1	KO	118.685
ENSMUSG00000018583	DOWN	rep2	KO	108.841
ENSMUSG00000018583	DOWN	rep1	WT	92.4934
ENSMUSG00000018583	DOWN	rep2	WT	102.215
ENSMUSG00000018666	DOWN	rep1	KO	114.069
ENSMUSG00000018666	DOWN	rep2	KO	134.459
ENSMUSG00000018666	DOWN	rep1	WT	109.167
ENSMUSG00000018666	DOWN	rep2	WT	124.185
ENSMUSG00000018707	UP	rep1	KO	131.246
ENSMUSG00000018707	UP	rep2	KO	148.683
ENSMUSG00000018707	UP	rep1	WT	135.612
ENSMUSG00000018707	UP	rep2	WT	128.035
ENSMUSG00000018765	CONTROL	rep1	KO	103.512
ENSMUSG00000018765	CONTROL	rep2	KO	136.606
ENSMUSG00000018765	CONTROL	rep1	WT	95.7276
ENSMUSG00000018765	CONTROL	rep2	WT	104.919
ENSMUSG00000018796	CONTROL	rep1	KO	111.911
ENSMUSG00000018796	CONTROL	rep2	KO	111.417
ENSMUSG00000018796	CONTROL	rep1	WT	111.347
ENSMUSG00000018796	CONTROL	rep2	WT	111.765
ENSMUSG00000018858	UP	rep1	KO	111.534
ENSMUSG00000018858	UP	rep2	KO	113.503
ENSMUSG00000018858	UP	rep1	WT	104.319
ENSMUSG00000018858	UP	rep2	WT	99.4951
ENSMUSG00000018882	CONTROL	rep1	KO	99.3421
ENSMUSG00000018882	CONTROL	rep2	KO	114.017
ENSMUSG00000018882	CONTROL	rep1	WT	95.5675
ENSMUSG00000018882	CONTROL	rep2	WT	101.654
ENSMUSG00000018923	DOWN	rep1	KO	94.1976
ENSMUSG00000018923	DOWN	rep2	KO	100.168
ENSMUSG00000018923	DOWN	rep1	WT	86.8775
ENSMUSG00000018923	DOWN	rep2	WT	102.113
ENSMUSG00000018965	CONTROL	rep1	KO	107.924
ENSMUSG00000018965	CONTROL	rep2	KO	121.355
ENSMUSG00000018965	CONTROL	rep1	WT	113.898
ENSMUSG00000018965	CONTROL	rep2	WT	104.199
ENSMUSG00000019054	CONTROL	rep1	KO	133.61
ENSMUSG00000019054	CONTROL	rep2	KO	117.877
ENSMUSG00000019054	CONTROL	rep1	WT	125.892
ENSMUSG00000019054	CONTROL	rep2	WT	141.18
ENSMUSG00000019158	CONTROL	rep1	KO	77.2725
ENSMUSG00000019158	CONTROL	rep2	KO	87.1678
ENSMUSG00000019158	CONTROL	rep1	WT	78.8842
ENSMUSG00000019158	CONTROL	rep2	WT	82.2782
ENSMUSG00000019179	UP	rep1	KO	97.2606
ENSMUSG00000019179	UP	rep2	KO	98.3662
ENSMUSG00000019179	UP	rep1	WT	97.0948
ENSMUSG00000019179	UP	rep2	WT	102.113
ENSMUSG00000019297	DOWN	rep1	KO	92.2037
ENSMUSG00000019297	DOWN	rep2	KO	105.21
ENSMUSG00000019297	DOWN	rep1	WT	79.0628
ENSMUSG00000019297	DOWN	rep2	WT	96.9991
ENSMUSG00000019428	CONTROL	rep1	KO	102.148
ENSMUSG00000019428	CONTROL	rep2	KO	114.474
ENSMUSG00000019428	CONTROL	rep1	WT	100.26
ENSMUSG00000019428	CONTROL	rep2	WT	107.102
ENSMUSG00000019432	CONTROL	rep1	KO	122.547
ENSMUSG00000019432	CONTROL	rep2	KO	125.889
ENSMUSG00000019432	CONTROL	rep1	WT	122.867
ENSMUSG00000019432	CONTROL	rep2	WT	124.598
ENSMUSG00000019433	CONTROL	rep1	KO	106.818
ENSMUSG00000019433	CONTROL	rep2	KO	114.596
ENSMUSG00000019433	CONTROL	rep1	WT	114.14
ENSMUSG00000019433	CONTROL	rep2	WT	121.033
ENSMUSG00000019478	CONTROL	rep1	KO	108.744
ENSMUSG00000019478	CONTROL	rep2	KO	122.219
ENSMUSG00000019478	CONTROL	rep1	WT	116.909
ENSMUSG00000019478	CONTROL	rep2	WT	103.899
ENSMUSG00000019494	CONTROL	rep1	KO	94.1254
ENSMUSG00000019494	CONTROL	rep2	KO	102.863
ENSMUSG00000019494	CONTROL	rep1	WT	98.1172
ENSMUSG00000019494	CONTROL	rep2	WT	100.573
ENSMUSG00000019505	CONTROL	rep1	KO	98.8366
ENSMUSG00000019505	CONTROL	rep2	KO	105.715
ENSMUSG00000019505	CONTROL	rep1	WT	98.2129
ENSMUSG00000019505	CONTROL	rep2	WT	103.307
ENSMUSG00000019578	CONTROL	rep1	KO	108.12
ENSMUSG00000019578	CONTROL	rep2	KO	107.272
ENSMUSG00000019578	CONTROL	rep1	WT	92.9427
ENSMUSG00000019578	CONTROL	rep2	WT	93.7559
ENSMUSG00000019795	CONTROL	rep1	KO	99.4308
ENSMUSG00000019795	CONTROL	rep2	KO	93.6698
ENSMUSG00000019795	CONTROL	rep1	WT	93.9042
ENSMUSG00000019795	CONTROL	rep2	WT	84.5319
ENSMUSG00000019804	DOWN	rep1	KO	95.2494
ENSMUSG00000019804	DOWN	rep2	KO	110.101
ENSMUSG00000019804	DOWN	rep1	WT	102.505
ENSMUSG00000019804	DOWN	rep2	WT	107.002
ENSMUSG00000019808	CONTROL	rep1	KO	106.399
ENSMUSG00000019808	CONTROL	rep2	KO	120.299
ENSMUSG00000019808	CONTROL	rep1	WT	104.513
ENSMUSG00000019808	CONTROL	rep2	WT	100.076
ENSMUSG00000019857	DOWN	rep1	KO	86.7839
ENSMUSG00000019857	DOWN	rep2	KO	92.3241
ENSMUSG00000019857	DOWN	rep1	WT	84.5055
ENSMUSG00000019857	DOWN	rep2	WT	102.507
ENSMUSG00000019897	CONTROL	rep1	KO	111.063
ENSMUSG00000019897	CONTROL	rep2	KO	117.515
ENSMUSG00000019897	CONTROL	rep1	WT	98.325
ENSMUSG00000019897	CONTROL	rep2	WT	105.897
ENSMUSG00000019923	CONTROL	rep1	KO	103.811
ENSMUSG00000019923	CONTROL	rep2	KO	90.1053
ENSMUSG00000019923	CONTROL	rep1	WT	94.4304
ENSMUSG00000019923	CONTROL	rep2	WT	105.68
ENSMUSG00000019969	UP	rep1	KO	105.251
ENSMUSG00000019969	UP	rep2	KO	125.042
ENSMUSG00000019969	UP	rep1	WT	112.263
ENSMUSG00000019969	UP	rep2	WT	116.123
ENSMUSG00000019970	DOWN	rep1	KO	110.009
ENSMUSG00000019970	DOWN	rep2	KO	123.475
ENSMUSG00000019970	DOWN	rep1	WT	116.133
ENSMUSG00000019970	DOWN	rep2	WT	119.845
ENSMUSG00000019977	CONTROL	rep1	KO	110.794
ENSMUSG00000019977	CONTROL	rep2	KO	98.2851
ENSMUSG00000019977	CONTROL	rep1	WT	84.2944
ENSMUSG00000019977	CONTROL	rep2	WT	117.637
ENSMUSG00000019978	DOWN	rep1	KO	139.469
ENSMUSG00000019978	DOWN	rep2	KO	154.427
ENSMUSG00000019978	DOWN	rep1	WT	118.38
ENSMUSG00000019978	DOWN	rep2	WT	137.996
ENSMUSG00000020022	CONTROL	rep1	KO	106.394
ENSMUSG00000020022	CONTROL	rep2	KO	89.2007
ENSMUSG00000020022	CONTROL	rep1	WT	102.717
ENSMUSG00000020022	CONTROL	rep2	WT	94.2721
ENSMUSG00000020088	CONTROL	rep1	KO	102.417
ENSMUSG00000020088	CONTROL	rep2	KO	117.439
ENSMUSG00000020088	CONTROL	rep1	WT	109.041
ENSMUSG00000020088	CONTROL	rep2	WT	102.278
ENSMUSG00000020089	CONTROL	rep1	KO	88.6843
ENSMUSG00000020089	CONTROL	rep2	KO	96.8489
ENSMUSG00000020089	CONTROL	rep1	WT	82.3146
ENSMUSG00000020089	CONTROL	rep2	WT	83.5108
ENSMUSG00000020109	CONTROL	rep1	KO	92.7844
ENSMUSG00000020109	CONTROL	rep2	KO	107.003
ENSMUSG00000020109	CONTROL	rep1	WT	88.821
ENSMUSG00000020109	CONTROL	rep2	WT	117.093
ENSMUSG00000020149	DOWN	rep1	KO	96.0485
ENSMUSG00000020149	DOWN	rep2	KO	102.419
ENSMUSG00000020149	DOWN	rep1	WT	108.737
ENSMUSG00000020149	DOWN	rep2	WT	107.471
ENSMUSG00000020180	CONTROL	rep1	KO	111.318
ENSMUSG00000020180	CONTROL	rep2	KO	111.566
ENSMUSG00000020180	CONTROL	rep1	WT	119.71
ENSMUSG00000020180	CONTROL	rep2	WT	113.436
ENSMUSG00000020186	DOWN	rep1	KO	111.261
ENSMUSG00000020186	DOWN	rep2	KO	110.893
ENSMUSG00000020186	DOWN	rep1	WT	88.6266
ENSMUSG00000020186	DOWN	rep2	WT	87.1764
ENSMUSG00000020211	CONTROL	rep1	KO	120.716
ENSMUSG00000020211	CONTROL	rep2	KO	117.326
ENSMUSG00000020211	CONTROL	rep1	WT	114.539
ENSMUSG00000020211	CONTROL	rep2	WT	104.117
ENSMUSG00000020250	CONTROL	rep1	KO	117.717
ENSMUSG00000020250	CONTROL	rep2	KO	118.91
ENSMUSG00000020250	CONTROL	rep1	WT	107.561
ENSMUSG00000020250	CONTROL	rep2	WT	116.297
ENSMUSG00000020257	CONTROL	rep1	KO	97.8181
ENSMUSG00000020257	CONTROL	rep2	KO	135.445
ENSMUSG00000020257	CONTROL	rep1	WT	94.5235
ENSMUSG00000020257	CONTROL	rep2	WT	108.356
ENSMUSG00000020265	CONTROL	rep1	KO	95.5317
ENSMUSG00000020265	CONTROL	rep2	KO	105.363
ENSMUSG00000020265	CONTROL	rep1	WT	102.103
ENSMUSG00000020265	CONTROL	rep2	WT	100.877
ENSMUSG00000020267	CONTROL	rep1	KO	101.95
ENSMUSG00000020267	CONTROL	rep2	KO	106.197
ENSMUSG00000020267	CONTROL	rep1	WT	98.8647
ENSMUSG00000020267	CONTROL	rep2	WT	102.279
ENSMUSG00000020290	CONTROL	rep1	KO	125.401
ENSMUSG00000020290	CONTROL	rep2	KO	137.923
ENSMUSG00000020290	CONTROL	rep1	WT	112.544
ENSMUSG00000020290	CONTROL	rep2	WT	138.37
ENSMUSG00000020307	DOWN	rep1	KO	96.7272
ENSMUSG00000020307	DOWN	rep2	KO	97.394
ENSMUSG00000020307	DOWN	rep1	WT	87.6579
ENSMUSG00000020307	DOWN	rep2	WT	85.6127
ENSMUSG00000020308	CONTROL	rep1	KO	83.3132
ENSMUSG00000020308	CONTROL	rep2	KO	90.7883
ENSMUSG00000020308	CONTROL	rep1	WT	85.6873
ENSMUSG00000020308	CONTROL	rep2	WT	87.0297
ENSMUSG00000020328	DOWN	rep1	KO	101.332
ENSMUSG00000020328	DOWN	rep2	KO	119.625
ENSMUSG00000020328	DOWN	rep1	WT	107.213
ENSMUSG00000020328	DOWN	rep2	WT	107.522
ENSMUSG00000020349	CONTROL	rep1	KO	102.55
ENSMUSG00000020349	CONTROL	rep2	KO	103.824
ENSMUSG00000020349	CONTROL	rep1	WT	99.0921
ENSMUSG00000020349	CONTROL	rep2	WT	104.393
ENSMUSG00000020372	CONTROL	rep1	KO	95.9162
ENSMUSG00000020372	CONTROL	rep2	KO	93.6598
ENSMUSG00000020372	CONTROL	rep1	WT	88.191
ENSMUSG00000020372	CONTROL	rep2	WT	100.526
ENSMUSG00000020386	CONTROL	rep1	KO	96.5721
ENSMUSG00000020386	CONTROL	rep2	KO	92.8371
ENSMUSG00000020386	CONTROL	rep1	WT	107.167
ENSMUSG00000020386	CONTROL	rep2	WT	108.21
ENSMUSG00000020392	CONTROL	rep1	KO	105.54
ENSMUSG00000020392	CONTROL	rep2	KO	106.606
ENSMUSG00000020392	CONTROL	rep1	WT	110.578
ENSMUSG00000020392	CONTROL	rep2	WT	103.46
ENSMUSG00000020402	DOWN	rep1	KO	105.162
ENSMUSG00000020402	DOWN	rep2	KO	108.647
ENSMUSG00000020402	DOWN	rep1	WT	99.4674
ENSMUSG00000020402	DOWN	rep2	WT	99.3153
ENSMUSG00000020424	DOWN	rep1	KO	136.989
ENSMUSG00000020424	DOWN	rep2	KO	132.249
ENSMUSG00000020424	DOWN	rep1	WT	107.768
ENSMUSG00000020424	DOWN	rep2	WT	130.322
ENSMUSG00000020440	UP	rep1	KO	125.794
ENSMUSG00000020440	UP	rep2	KO	130.148
ENSMUSG00000020440	UP	rep1	WT	127.655
ENSMUSG00000020440	UP	rep2	WT	141.751
ENSMUSG00000020456	CONTROL	rep1	KO	129.917
ENSMUSG00000020456	CONTROL	rep2	KO	107.031
ENSMUSG00000020456	CONTROL	rep1	WT	128.288
ENSMUSG00000020456	CONTROL	rep2	WT	121.803
ENSMUSG00000020458	CONTROL	rep1	KO	97.215
ENSMUSG00000020458	CONTROL	rep2	KO	118.304
ENSMUSG00000020458	CONTROL	rep1	WT	105.065
ENSMUSG00000020458	CONTROL	rep2	WT	126.681
ENSMUSG00000020476	CONTROL	rep1	KO	123.362
ENSMUSG00000020476	CONTROL	rep2	KO	106.502
ENSMUSG00000020476	CONTROL	rep1	WT	119.327
ENSMUSG00000020476	CONTROL	rep2	WT	107.604
ENSMUSG00000020515	DOWN	rep1	KO	83.1342
ENSMUSG00000020515	DOWN	rep2	KO	128.143
ENSMUSG00000020515	DOWN	rep1	WT	119.442
ENSMUSG00000020515	DOWN	rep2	WT	130.632
ENSMUSG00000020549	CONTROL	rep1	KO	112.098
ENSMUSG00000020549	CONTROL	rep2	KO	109.98
ENSMUSG00000020549	CONTROL	rep1	WT	101.884
ENSMUSG00000020549	CONTROL	rep2	WT	99.2415
ENSMUSG00000020572	DOWN	rep1	KO	126.789
ENSMUSG00000020572	DOWN	rep2	KO	133.329
ENSMUSG00000020572	DOWN	rep1	WT	108.984
ENSMUSG00000020572	DOWN	rep2	WT	135.37
ENSMUSG00000020585	CONTROL	rep1	KO	130.994
ENSMUSG00000020585	CONTROL	rep2	KO	127.021
ENSMUSG00000020585	CONTROL	rep1	WT	123.219
ENSMUSG00000020585	CONTROL	rep2	WT	122.27
ENSMUSG00000020611	CONTROL	rep1	KO	112.888
ENSMUSG00000020611	CONTROL	rep2	KO	111.984
ENSMUSG00000020611	CONTROL	rep1	WT	101.67
ENSMUSG00000020611	CONTROL	rep2	WT	112.933
ENSMUSG00000020612	CONTROL	rep1	KO	104.385
ENSMUSG00000020612	CONTROL	rep2	KO	116.436
ENSMUSG00000020612	CONTROL	rep1	WT	119.302
ENSMUSG00000020612	CONTROL	rep2	WT	123.392
ENSMUSG00000020630	DOWN	rep1	KO	114.302
ENSMUSG00000020630	DOWN	rep2	KO	138.237
ENSMUSG00000020630	DOWN	rep1	WT	110.455
ENSMUSG00000020630	DOWN	rep2	WT	117.563
ENSMUSG00000020649	DOWN	rep1	KO	116.012
ENSMUSG00000020649	DOWN	rep2	KO	127.877
ENSMUSG00000020649	DOWN	rep1	WT	104.474
ENSMUSG00000020649	DOWN	rep2	WT	113.387
ENSMUSG00000020677	CONTROL	rep1	KO	101.803
ENSMUSG00000020677	CONTROL	rep2	KO	94.2717
ENSMUSG00000020677	CONTROL	rep1	WT	92
ENSMUSG00000020677	CONTROL	rep2	WT	109.833
ENSMUSG00000020697	CONTROL	rep1	KO	135.373
ENSMUSG00000020697	CONTROL	rep2	KO	111.859
ENSMUSG00000020697	CONTROL	rep1	WT	114.564
ENSMUSG00000020697	CONTROL	rep2	WT	110.979
ENSMUSG00000020705	CONTROL	rep1	KO	111.613
ENSMUSG00000020705	CONTROL	rep2	KO	127.371
ENSMUSG00000020705	CONTROL	rep1	WT	106.433
ENSMUSG00000020705	CONTROL	rep2	WT	139.055
ENSMUSG00000020720	CONTROL	rep1	KO	113.317
ENSMUSG00000020720	CONTROL	rep2	KO	108.891
ENSMUSG00000020720	CONTROL	rep1	WT	96.194
ENSMUSG00000020720	CONTROL	rep2	WT	103.148
ENSMUSG00000020741	CONTROL	rep1	KO	163.09
ENSMUSG00000020741	CONTROL	rep2	KO	141.315
ENSMUSG00000020741	CONTROL	rep1	WT	120.337
ENSMUSG00000020741	CONTROL	rep2	WT	154.71
ENSMUSG00000020755	CONTROL	rep1	KO	113.607
ENSMUSG00000020755	CONTROL	rep2	KO	118.415
ENSMUSG00000020755	CONTROL	rep1	WT	106.823
ENSMUSG00000020755	CONTROL	rep2	WT	109.251
ENSMUSG00000020808	CONTROL	rep1	KO	121.919
ENSMUSG00000020808	CONTROL	rep2	KO	127.837
ENSMUSG00000020808	CONTROL	rep1	WT	115.958
ENSMUSG00000020808	CONTROL	rep2	WT	115.257
ENSMUSG00000020840	UP	rep1	KO	106.665
ENSMUSG00000020840	UP	rep2	KO	114.47
ENSMUSG00000020840	UP	rep1	WT	114.508
ENSMUSG00000020840	UP	rep2	WT	105.142
ENSMUSG00000020843	UP	rep1	KO	77.8346
ENSMUSG00000020843	UP	rep2	KO	96.1457
ENSMUSG00000020843	UP	rep1	WT	106.173
ENSMUSG00000020843	UP	rep2	WT	112.017
ENSMUSG00000020849	CONTROL	rep1	KO	102.044
ENSMUSG00000020849	CONTROL	rep2	KO	107.242
ENSMUSG00000020849	CONTROL	rep1	WT	103.445
ENSMUSG00000020849	CONTROL	rep2	WT	107.281
ENSMUSG00000020850	DOWN	rep1	KO	127.037
ENSMUSG00000020850	DOWN	rep2	KO	117.14
ENSMUSG00000020850	DOWN	rep1	WT	110.374
ENSMUSG00000020850	DOWN	rep2	WT	123.346
ENSMUSG00000020869	CONTROL	rep1	KO	85.8344
ENSMUSG00000020869	CONTROL	rep2	KO	99.2266
ENSMUSG00000020869	CONTROL	rep1	WT	101.531
ENSMUSG00000020869	CONTROL	rep2	WT	98.4001
ENSMUSG00000020873	CONTROL	rep1	KO	105.644
ENSMUSG00000020873	CONTROL	rep2	KO	97.517
ENSMUSG00000020873	CONTROL	rep1	WT	96.1804
ENSMUSG00000020873	CONTROL	rep2	WT	100.926
ENSMUSG00000020888	CONTROL	rep1	KO	121.788
ENSMUSG00000020888	CONTROL	rep2	KO	131.16
ENSMUSG00000020888	CONTROL	rep1	WT	115.832
ENSMUSG00000020888	CONTROL	rep2	WT	131.526
ENSMUSG00000020897	DOWN	rep1	KO	103.156
ENSMUSG00000020897	DOWN	rep2	KO	132.36
ENSMUSG00000020897	DOWN	rep1	WT	102.665
ENSMUSG00000020897	DOWN	rep2	WT	116.512
ENSMUSG00000020936	UP	rep1	KO	91.9208
ENSMUSG00000020936	UP	rep2	KO	116.216
ENSMUSG00000020936	UP	rep1	WT	90.9832
ENSMUSG00000020936	UP	rep2	WT	89.5197
ENSMUSG00000020978	UP	rep1	KO	94.7603
ENSMUSG00000020978	UP	rep2	KO	85.7111
ENSMUSG00000020978	UP	rep1	WT	110.101
ENSMUSG00000020978	UP	rep2	WT	122.491
ENSMUSG00000020994	CONTROL	rep1	KO	130.921
ENSMUSG00000020994	CONTROL	rep2	KO	162.513
ENSMUSG00000020994	CONTROL	rep1	WT	140.976
ENSMUSG00000020994	CONTROL	rep2	WT	107.739
ENSMUSG00000021012	CONTROL	rep1	KO	89.6969
ENSMUSG00000021012	CONTROL	rep2	KO	90.4974
ENSMUSG00000021012	CONTROL	rep1	WT	99.6487
ENSMUSG00000021012	CONTROL	rep2	WT	97.9316
ENSMUSG00000021024	CONTROL	rep1	KO	76.4135
ENSMUSG00000021024	CONTROL	rep2	KO	98.1929
ENSMUSG00000021024	CONTROL	rep1	WT	91.58
ENSMUSG00000021024	CONTROL	rep2	WT	99.0882
ENSMUSG00000021096	CONTROL	rep1	KO	107.963
ENSMUSG00000021096	CONTROL	rep2	KO	128.065
ENSMUSG00000021096	CONTROL	rep1	WT	83.3542
ENSMUSG00000021096	CONTROL	rep2	WT	114.047
ENSMUSG00000021102	CONTROL	rep1	KO	102.77
ENSMUSG00000021102	CONTROL	rep2	KO	104.08
ENSMUSG00000021102	CONTROL	rep1	WT	93.4332
ENSMUSG00000021102	CONTROL	rep2	WT	93.7308
ENSMUSG00000021103	CONTROL	rep1	KO	108.801
ENSMUSG00000021103	CONTROL	rep2	KO	110.089
ENSMUSG00000021103	CONTROL	rep1	WT	105.978
ENSMUSG00000021103	CONTROL	rep2	WT	109.553
ENSMUSG00000021111	CONTROL	rep1	KO	122.19
ENSMUSG00000021111	CONTROL	rep2	KO	111.213
ENSMUSG00000021111	CONTROL	rep1	WT	109.801
ENSMUSG00000021111	CONTROL	rep2	WT	128.892
ENSMUSG00000021116	DOWN	rep1	KO	99.7482
ENSMUSG00000021116	DOWN	rep2	KO	99.2928
ENSMUSG00000021116	DOWN	rep1	WT	92.596
ENSMUSG00000021116	DOWN	rep2	WT	105.307
ENSMUSG00000021134	CONTROL	rep1	KO	132.541
ENSMUSG00000021134	CONTROL	rep2	KO	159.001
ENSMUSG00000021134	CONTROL	rep1	WT	132.929
ENSMUSG00000021134	CONTROL	rep2	WT	147.514
ENSMUSG00000021144	DOWN	rep1	KO	149.258
ENSMUSG00000021144	DOWN	rep2	KO	127.676
ENSMUSG00000021144	DOWN	rep1	WT	101.33
ENSMUSG00000021144	DOWN	rep2	WT	101.101
ENSMUSG00000021193	CONTROL	rep1	KO	96.9736
ENSMUSG00000021193	CONTROL	rep2	KO	114.554
ENSMUSG00000021193	CONTROL	rep1	WT	114.768
ENSMUSG00000021193	CONTROL	rep2	WT	123.341
ENSMUSG00000021255	DOWN	rep1	KO	115.024
ENSMUSG00000021255	DOWN	rep2	KO	133.287
ENSMUSG00000021255	DOWN	rep1	WT	116.097
ENSMUSG00000021255	DOWN	rep2	WT	152.834
ENSMUSG00000021264	CONTROL	rep1	KO	89.7451
ENSMUSG00000021264	CONTROL	rep2	KO	111.711
ENSMUSG00000021264	CONTROL	rep1	WT	114.337
ENSMUSG00000021264	CONTROL	rep2	WT	117.731
ENSMUSG00000021273	CONTROL	rep1	KO	90.351
ENSMUSG00000021273	CONTROL	rep2	KO	98.1562
ENSMUSG00000021273	CONTROL	rep1	WT	106.522
ENSMUSG00000021273	CONTROL	rep2	WT	109.853
ENSMUSG00000021282	CONTROL	rep1	KO	113.384
ENSMUSG00000021282	CONTROL	rep2	KO	123.568
ENSMUSG00000021282	CONTROL	rep1	WT	103.041
ENSMUSG00000021282	CONTROL	rep2	WT	102.936
ENSMUSG00000021326	DOWN	rep1	KO	113.38
ENSMUSG00000021326	DOWN	rep2	KO	102.703
ENSMUSG00000021326	DOWN	rep1	WT	97.6766
ENSMUSG00000021326	DOWN	rep2	WT	97.5694
ENSMUSG00000021395	DOWN	rep1	KO	95.2308
ENSMUSG00000021395	DOWN	rep2	KO	116.733
ENSMUSG00000021395	DOWN	rep1	WT	112.532
ENSMUSG00000021395	DOWN	rep2	WT	118.147
ENSMUSG00000021474	UP	rep1	KO	114.066
ENSMUSG00000021474	UP	rep2	KO	120.159
ENSMUSG00000021474	UP	rep1	WT	111.517
ENSMUSG00000021474	UP	rep2	WT	105.551
ENSMUSG00000021488	CONTROL	rep1	KO	110.407
ENSMUSG00000021488	CONTROL	rep2	KO	140.55
ENSMUSG00000021488	CONTROL	rep1	WT	130.735
ENSMUSG00000021488	CONTROL	rep2	WT	138.477
ENSMUSG00000021497	CONTROL	rep1	KO	114.665
ENSMUSG00000021497	CONTROL	rep2	KO	103.423
ENSMUSG00000021497	CONTROL	rep1	WT	111.752
ENSMUSG00000021497	CONTROL	rep2	WT	110.316
ENSMUSG00000021500	CONTROL	rep1	KO	114.554
ENSMUSG00000021500	CONTROL	rep2	KO	136.394
ENSMUSG00000021500	CONTROL	rep1	WT	91.4828
ENSMUSG00000021500	CONTROL	rep2	WT	102.25
ENSMUSG00000021518	CONTROL	rep1	KO	107.967
ENSMUSG00000021518	CONTROL	rep2	KO	90.1847
ENSMUSG00000021518	CONTROL	rep1	WT	108.032
ENSMUSG00000021518	CONTROL	rep2	WT	97.8998
ENSMUSG00000021537	UP	rep1	KO	98.4843
ENSMUSG00000021537	UP	rep2	KO	107.199
ENSMUSG00000021537	UP	rep1	WT	101.22
ENSMUSG00000021537	UP	rep2	WT	105.112
ENSMUSG00000021546	CONTROL	rep1	KO	119.32
ENSMUSG00000021546	CONTROL	rep2	KO	125.077
ENSMUSG00000021546	CONTROL	rep1	WT	119.744
ENSMUSG00000021546	CONTROL	rep2	WT	134.78
ENSMUSG00000021578	CONTROL	rep1	KO	89.2885
ENSMUSG00000021578	CONTROL	rep2	KO	107.901
ENSMUSG00000021578	CONTROL	rep1	WT	92.6055
ENSMUSG00000021578	CONTROL	rep2	WT	93.8244
ENSMUSG00000021598	DOWN	rep1	KO	103.956
ENSMUSG00000021598	DOWN	rep2	KO	104.807
ENSMUSG00000021598	DOWN	rep1	WT	100.476
ENSMUSG00000021598	DOWN	rep2	WT	107.627
ENSMUSG00000021707	DOWN	rep1	KO	101.836
ENSMUSG00000021707	DOWN	rep2	KO	100.29
ENSMUSG00000021707	DOWN	rep1	WT	94.6899
ENSMUSG00000021707	DOWN	rep2	WT	96.1238
ENSMUSG00000021748	DOWN	rep1	KO	110.613
ENSMUSG00000021748	DOWN	rep2	KO	117.693
ENSMUSG00000021748	DOWN	rep1	WT	120.056
ENSMUSG00000021748	DOWN	rep2	WT	114.969
ENSMUSG00000021752	DOWN	rep1	KO	118.115
ENSMUSG00000021752	DOWN	rep2	KO	130.587
ENSMUSG00000021752	DOWN	rep1	WT	90.552
ENSMUSG00000021752	DOWN	rep2	WT	103.501
ENSMUSG00000021807	DOWN	rep1	KO	111.67
ENSMUSG00000021807	DOWN	rep2	KO	118.004
ENSMUSG00000021807	DOWN	rep1	WT	86.8132
ENSMUSG00000021807	DOWN	rep2	WT	106.203
ENSMUSG00000021832	CONTROL	rep1	KO	88.0978
ENSMUSG00000021832	CONTROL	rep2	KO	108.755
ENSMUSG00000021832	CONTROL	rep1	WT	94.235
ENSMUSG00000021832	CONTROL	rep2	WT	106.259
ENSMUSG00000021868	DOWN	rep1	KO	99.5613
ENSMUSG00000021868	DOWN	rep2	KO	101.302
ENSMUSG00000021868	DOWN	rep1	WT	92.6556
ENSMUSG00000021868	DOWN	rep2	WT	101.916
ENSMUSG00000021901	DOWN	rep1	KO	137.421
ENSMUSG00000021901	DOWN	rep2	KO	114.029
ENSMUSG00000021901	DOWN	rep1	WT	104.604
ENSMUSG00000021901	DOWN	rep2	WT	114.817
ENSMUSG00000021932	DOWN	rep1	KO	97.3324
ENSMUSG00000021932	DOWN	rep2	KO	89.1404
ENSMUSG00000021932	DOWN	rep1	WT	100.368
ENSMUSG00000021932	DOWN	rep2	WT	101.019
ENSMUSG00000021953	DOWN	rep1	KO	106.633
ENSMUSG00000021953	DOWN	rep2	KO	108.66
ENSMUSG00000021953	DOWN	rep1	WT	74.7096
ENSMUSG00000021953	DOWN	rep2	WT	72.8288
ENSMUSG00000021957	UP	rep1	KO	93.7638
ENSMUSG00000021957	UP	rep2	KO	103.555
ENSMUSG00000021957	UP	rep1	WT	97.6209
ENSMUSG00000021957	UP	rep2	WT	96.5957
ENSMUSG00000021967	UP	rep1	KO	112.2
ENSMUSG00000021967	UP	rep2	KO	103.336
ENSMUSG00000021967	UP	rep1	WT	102.311
ENSMUSG00000021967	UP	rep2	WT	103.378
ENSMUSG00000022010	CONTROL	rep1	KO	102.794
ENSMUSG00000022010	CONTROL	rep2	KO	103.15
ENSMUSG00000022010	CONTROL	rep1	WT	117.513
ENSMUSG00000022010	CONTROL	rep2	WT	114.211
ENSMUSG00000022110	CONTROL	rep1	KO	93.1612
ENSMUSG00000022110	CONTROL	rep2	KO	110.923
ENSMUSG00000022110	CONTROL	rep1	WT	109.49
ENSMUSG00000022110	CONTROL	rep2	WT	113.13
ENSMUSG00000022111	DOWN	rep1	KO	92.9618
ENSMUSG00000022111	DOWN	rep2	KO	99.956
ENSMUSG00000022111	DOWN	rep1	WT	97.5098
ENSMUSG00000022111	DOWN	rep2	WT	94.3722
ENSMUSG00000022125	DOWN	rep1	KO	87.375
ENSMUSG00000022125	DOWN	rep2	KO	124.066
ENSMUSG00000022125	DOWN	rep1	WT	97.5646
ENSMUSG00000022125	DOWN	rep2	WT	124.363
ENSMUSG00000022186	UP	rep1	KO	112.611
ENSMUSG00000022186	UP	rep2	KO	120.03
ENSMUSG00000022186	UP	rep1	WT	110.237
ENSMUSG00000022186	UP	rep2	WT	102.883
ENSMUSG00000022194	DOWN	rep1	KO	142.702
ENSMUSG00000022194	DOWN	rep2	KO	140.631
ENSMUSG00000022194	DOWN	rep1	WT	128.031
ENSMUSG00000022194	DOWN	rep2	WT	124.059
ENSMUSG00000022216	UP	rep1	KO	108.981
ENSMUSG00000022216	UP	rep2	KO	108.959
ENSMUSG00000022216	UP	rep1	WT	99.152
ENSMUSG00000022216	UP	rep2	WT	111.653
ENSMUSG00000022248	DOWN	rep1	KO	124.825
ENSMUSG00000022248	DOWN	rep2	KO	145.847
ENSMUSG00000022248	DOWN	rep1	WT	114.846
ENSMUSG00000022248	DOWN	rep2	WT	112.252
ENSMUSG00000022255	CONTROL	rep1	KO	124.698
ENSMUSG00000022255	CONTROL	rep2	KO	114.611
ENSMUSG00000022255	CONTROL	rep1	WT	97.4365
ENSMUSG00000022255	CONTROL	rep2	WT	113.893
ENSMUSG00000022283	CONTROL	rep1	KO	99.7299
ENSMUSG00000022283	CONTROL	rep2	KO	99.911
ENSMUSG00000022283	CONTROL	rep1	WT	99.0343
ENSMUSG00000022283	CONTROL	rep2	WT	99.5013
ENSMUSG00000022295	CONTROL	rep1	KO	105.551
ENSMUSG00000022295	CONTROL	rep2	KO	102.663
ENSMUSG00000022295	CONTROL	rep1	WT	107.165
ENSMUSG00000022295	CONTROL	rep2	WT	128.229
ENSMUSG00000022307	CONTROL	rep1	KO	75.0968
ENSMUSG00000022307	CONTROL	rep2	KO	116.216
ENSMUSG00000022307	CONTROL	rep1	WT	118.507
ENSMUSG00000022307	CONTROL	rep2	WT	112.836
ENSMUSG00000022325	CONTROL	rep1	KO	90.39
ENSMUSG00000022325	CONTROL	rep2	KO	97.6384
ENSMUSG00000022325	CONTROL	rep1	WT	99.9847
ENSMUSG00000022325	CONTROL	rep2	WT	93.1991
ENSMUSG00000022338	DOWN	rep1	KO	122.579
ENSMUSG00000022338	DOWN	rep2	KO	138.864
ENSMUSG00000022338	DOWN	rep1	WT	129.264
ENSMUSG00000022338	DOWN	rep2	WT	123.674
ENSMUSG00000022385	DOWN	rep1	KO	108.978
ENSMUSG00000022385	DOWN	rep2	KO	116.295
ENSMUSG00000022385	DOWN	rep1	WT	130.027
ENSMUSG00000022385	DOWN	rep2	WT	123.06
ENSMUSG00000022394	CONTROL	rep1	KO	119.961
ENSMUSG00000022394	CONTROL	rep2	KO	99.262
ENSMUSG00000022394	CONTROL	rep1	WT	101.36
ENSMUSG00000022394	CONTROL	rep2	WT	98.7684
ENSMUSG00000022452	UP	rep1	KO	95.2781
ENSMUSG00000022452	UP	rep2	KO	99.9861
ENSMUSG00000022452	UP	rep1	WT	103.445
ENSMUSG00000022452	UP	rep2	WT	106.234
ENSMUSG00000022463	CONTROL	rep1	KO	110.169
ENSMUSG00000022463	CONTROL	rep2	KO	115.137
ENSMUSG00000022463	CONTROL	rep1	WT	107.951
ENSMUSG00000022463	CONTROL	rep2	WT	121.829
ENSMUSG00000022477	DOWN	rep1	KO	103.183
ENSMUSG00000022477	DOWN	rep2	KO	99.7742
ENSMUSG00000022477	DOWN	rep1	WT	103.612
ENSMUSG00000022477	DOWN	rep2	WT	107.541
ENSMUSG00000022503	CONTROL	rep1	KO	81.8794
ENSMUSG00000022503	CONTROL	rep2	KO	95.2369
ENSMUSG00000022503	CONTROL	rep1	WT	97.0448
ENSMUSG00000022503	CONTROL	rep2	WT	97.7168
ENSMUSG00000022551	CONTROL	rep1	KO	82.32
ENSMUSG00000022551	CONTROL	rep2	KO	96.6262
ENSMUSG00000022551	CONTROL	rep1	WT	88.9022
ENSMUSG00000022551	CONTROL	rep2	WT	93.5552
ENSMUSG00000022553	DOWN	rep1	KO	95.3403
ENSMUSG00000022553	DOWN	rep2	KO	104.134
ENSMUSG00000022553	DOWN	rep1	WT	94.7789
ENSMUSG00000022553	DOWN	rep2	WT	100.35
ENSMUSG00000022587	UP	rep1	KO	108.733
ENSMUSG00000022587	UP	rep2	KO	120.899
ENSMUSG00000022587	UP	rep1	WT	91.0877
ENSMUSG00000022587	UP	rep2	WT	113.975
ENSMUSG00000022678	DOWN	rep1	KO	108.484
ENSMUSG00000022678	DOWN	rep2	KO	114.527
ENSMUSG00000022678	DOWN	rep1	WT	100.567
ENSMUSG00000022678	DOWN	rep2	WT	114.829
ENSMUSG00000022682	CONTROL	rep1	KO	120.088
ENSMUSG00000022682	CONTROL	rep2	KO	129.302
ENSMUSG00000022682	CONTROL	rep1	WT	109.183
ENSMUSG00000022682	CONTROL	rep2	WT	123.865
ENSMUSG00000022702	CONTROL	rep1	KO	111.001
ENSMUSG00000022702	CONTROL	rep2	KO	141.794
ENSMUSG00000022702	CONTROL	rep1	WT	103.529
ENSMUSG00000022702	CONTROL	rep2	WT	121.08
ENSMUSG00000022742	DOWN	rep1	KO	131.269
ENSMUSG00000022742	DOWN	rep2	KO	128.377
ENSMUSG00000022742	DOWN	rep1	WT	99.8971
ENSMUSG00000022742	DOWN	rep2	WT	99.2474
ENSMUSG00000022752	DOWN	rep1	KO	88.4774
ENSMUSG00000022752	DOWN	rep2	KO	108.766
ENSMUSG00000022752	DOWN	rep1	WT	95.7914
ENSMUSG00000022752	DOWN	rep2	WT	98.5139
ENSMUSG00000022770	CONTROL	rep1	KO	107.409
ENSMUSG00000022770	CONTROL	rep2	KO	138.155
ENSMUSG00000022770	CONTROL	rep1	WT	118.15
ENSMUSG00000022770	CONTROL	rep2	WT	118.366
ENSMUSG00000022774	CONTROL	rep1	KO	144.847
ENSMUSG00000022774	CONTROL	rep2	KO	125.731
ENSMUSG00000022774	CONTROL	rep1	WT	118.31
ENSMUSG00000022774	CONTROL	rep2	WT	142.612
ENSMUSG00000022797	DOWN	rep1	KO	132.696
ENSMUSG00000022797	DOWN	rep2	KO	122.466
ENSMUSG00000022797	DOWN	rep1	WT	113.371
ENSMUSG00000022797	DOWN	rep2	WT	126.89
ENSMUSG00000022800	CONTROL	rep1	KO	108.895
ENSMUSG00000022800	CONTROL	rep2	KO	137.908
ENSMUSG00000022800	CONTROL	rep1	WT	132.277
ENSMUSG00000022800	CONTROL	rep2	WT	130.405
ENSMUSG00000022849	DOWN	rep1	KO	95.1153
ENSMUSG00000022849	DOWN	rep2	KO	101.653
ENSMUSG00000022849	DOWN	rep1	WT	92.0184
ENSMUSG00000022849	DOWN	rep2	WT	92.7912
ENSMUSG00000022897	CONTROL	rep1	KO	109.572
ENSMUSG00000022897	CONTROL	rep2	KO	120.6
ENSMUSG00000022897	CONTROL	rep1	WT	109.206
ENSMUSG00000022897	CONTROL	rep2	WT	106.299
ENSMUSG00000022905	CONTROL	rep1	KO	100.942
ENSMUSG00000022905	CONTROL	rep2	KO	100.379
ENSMUSG00000022905	CONTROL	rep1	WT	98.3107
ENSMUSG00000022905	CONTROL	rep2	WT	122.574
ENSMUSG00000022961	CONTROL	rep1	KO	142.31
ENSMUSG00000022961	CONTROL	rep2	KO	125.834
ENSMUSG00000022961	CONTROL	rep1	WT	124.61
ENSMUSG00000022961	CONTROL	rep2	WT	128.913
ENSMUSG00000022983	CONTROL	rep1	KO	97.683
ENSMUSG00000022983	CONTROL	rep2	KO	97.7517
ENSMUSG00000022983	CONTROL	rep1	WT	90.0269
ENSMUSG00000022983	CONTROL	rep2	WT	93.449
ENSMUSG00000022992	DOWN	rep1	KO	137.291
ENSMUSG00000022992	DOWN	rep2	KO	141.596
ENSMUSG00000022992	DOWN	rep1	WT	97.6179
ENSMUSG00000022992	DOWN	rep2	WT	113.662
ENSMUSG00000023018	CONTROL	rep1	KO	128.39
ENSMUSG00000023018	CONTROL	rep2	KO	127.661
ENSMUSG00000023018	CONTROL	rep1	WT	116.493
ENSMUSG00000023018	CONTROL	rep2	WT	126.408
ENSMUSG00000023020	UP	rep1	KO	110.749
ENSMUSG00000023020	UP	rep2	KO	104.921
ENSMUSG00000023020	UP	rep1	WT	111.284
ENSMUSG00000023020	UP	rep2	WT	129.158
ENSMUSG00000023025	CONTROL	rep1	KO	125.549
ENSMUSG00000023025	CONTROL	rep2	KO	129.669
ENSMUSG00000023025	CONTROL	rep1	WT	108.28
ENSMUSG00000023025	CONTROL	rep2	WT	108.374
ENSMUSG00000023067	UP	rep1	KO	96.11
ENSMUSG00000023067	UP	rep2	KO	109.763
ENSMUSG00000023067	UP	rep1	WT	88.1945
ENSMUSG00000023067	UP	rep2	WT	104.133
ENSMUSG00000023068	DOWN	rep1	KO	96.0956
ENSMUSG00000023068	DOWN	rep2	KO	115.216
ENSMUSG00000023068	DOWN	rep1	WT	87.8944
ENSMUSG00000023068	DOWN	rep2	WT	103.463
ENSMUSG00000023106	CONTROL	rep1	KO	104.354
ENSMUSG00000023106	CONTROL	rep2	KO	103.029
ENSMUSG00000023106	CONTROL	rep1	WT	101.103
ENSMUSG00000023106	CONTROL	rep2	WT	101.438
ENSMUSG00000023150	CONTROL	rep1	KO	132.169
ENSMUSG00000023150	CONTROL	rep2	KO	129.252
ENSMUSG00000023150	CONTROL	rep1	WT	128.272
ENSMUSG00000023150	CONTROL	rep2	WT	140.284
ENSMUSG00000023156	DOWN	rep1	KO	105.041
ENSMUSG00000023156	DOWN	rep2	KO	100.972
ENSMUSG00000023156	DOWN	rep1	WT	103.544
ENSMUSG00000023156	DOWN	rep2	WT	89.269
ENSMUSG00000023175	CONTROL	rep1	KO	108.837
ENSMUSG00000023175	CONTROL	rep2	KO	106.233
ENSMUSG00000023175	CONTROL	rep1	WT	101.853
ENSMUSG00000023175	CONTROL	rep2	WT	109.346
ENSMUSG00000023277	CONTROL	rep1	KO	105.05
ENSMUSG00000023277	CONTROL	rep2	KO	100.453
ENSMUSG00000023277	CONTROL	rep1	WT	104.9
ENSMUSG00000023277	CONTROL	rep2	WT	109.174
ENSMUSG00000023495	CONTROL	rep1	KO	123.93
ENSMUSG00000023495	CONTROL	rep2	KO	120.427
ENSMUSG00000023495	CONTROL	rep1	WT	107.147
ENSMUSG00000023495	CONTROL	rep2	WT	108.344
ENSMUSG00000023505	DOWN	rep1	KO	103.356
ENSMUSG00000023505	DOWN	rep2	KO	112.274
ENSMUSG00000023505	DOWN	rep1	WT	103.642
ENSMUSG00000023505	DOWN	rep2	WT	107.419
ENSMUSG00000023723	CONTROL	rep1	KO	113.112
ENSMUSG00000023723	CONTROL	rep2	KO	108.539
ENSMUSG00000023723	CONTROL	rep1	WT	103.398
ENSMUSG00000023723	CONTROL	rep2	WT	106.026
ENSMUSG00000023904	UP	rep1	KO	77.8498
ENSMUSG00000023904	UP	rep2	KO	92.4835
ENSMUSG00000023904	UP	rep1	WT	130.58
ENSMUSG00000023904	UP	rep2	WT	114.784
ENSMUSG00000023967	CONTROL	rep1	KO	106.875
ENSMUSG00000023967	CONTROL	rep2	KO	109.961
ENSMUSG00000023967	CONTROL	rep1	WT	113.402
ENSMUSG00000023967	CONTROL	rep2	WT	104.841
ENSMUSG00000024019	CONTROL	rep1	KO	131.267
ENSMUSG00000024019	CONTROL	rep2	KO	109.233
ENSMUSG00000024019	CONTROL	rep1	WT	116.034
ENSMUSG00000024019	CONTROL	rep2	WT	104.528
ENSMUSG00000024048	DOWN	rep1	KO	101.503
ENSMUSG00000024048	DOWN	rep2	KO	106.519
ENSMUSG00000024048	DOWN	rep1	WT	108.988
ENSMUSG00000024048	DOWN	rep2	WT	110.059
ENSMUSG00000024097	DOWN	rep1	KO	85.737
ENSMUSG00000024097	DOWN	rep2	KO	87.8751
ENSMUSG00000024097	DOWN	rep1	WT	83.6279
ENSMUSG00000024097	DOWN	rep2	WT	86.1631
ENSMUSG00000024132	CONTROL	rep1	KO	84.8447
ENSMUSG00000024132	CONTROL	rep2	KO	81.976
ENSMUSG00000024132	CONTROL	rep1	WT	90.9507
ENSMUSG00000024132	CONTROL	rep2	WT	101.457
ENSMUSG00000024146	CONTROL	rep1	KO	104.51
ENSMUSG00000024146	CONTROL	rep2	KO	113.266
ENSMUSG00000024146	CONTROL	rep1	WT	100.101
ENSMUSG00000024146	CONTROL	rep2	WT	101.763
ENSMUSG00000024160	CONTROL	rep1	KO	107.256
ENSMUSG00000024160	CONTROL	rep2	KO	133.575
ENSMUSG00000024160	CONTROL	rep1	WT	127.845
ENSMUSG00000024160	CONTROL	rep2	WT	112.139
ENSMUSG00000024258	DOWN	rep1	KO	106.674
ENSMUSG00000024258	DOWN	rep2	KO	109.918
ENSMUSG00000024258	DOWN	rep1	WT	110.635
ENSMUSG00000024258	DOWN	rep2	WT	104.948
ENSMUSG00000024271	CONTROL	rep1	KO	117.231
ENSMUSG00000024271	CONTROL	rep2	KO	128.323
ENSMUSG00000024271	CONTROL	rep1	WT	119.44
ENSMUSG00000024271	CONTROL	rep2	WT	119.889
ENSMUSG00000024277	DOWN	rep1	KO	98.3454
ENSMUSG00000024277	DOWN	rep2	KO	101.06
ENSMUSG00000024277	DOWN	rep1	WT	82.7474
ENSMUSG00000024277	DOWN	rep2	WT	98.765
ENSMUSG00000024287	CONTROL	rep1	KO	110.498
ENSMUSG00000024287	CONTROL	rep2	KO	97.7043
ENSMUSG00000024287	CONTROL	rep1	WT	97.6946
ENSMUSG00000024287	CONTROL	rep2	WT	113.324
ENSMUSG00000024312	CONTROL	rep1	KO	114.144
ENSMUSG00000024312	CONTROL	rep2	KO	125.614
ENSMUSG00000024312	CONTROL	rep1	WT	99.5497
ENSMUSG00000024312	CONTROL	rep2	WT	108.437
ENSMUSG00000024317	DOWN	rep1	KO	112.745
ENSMUSG00000024317	DOWN	rep2	KO	117.932
ENSMUSG00000024317	DOWN	rep1	WT	120.03
ENSMUSG00000024317	DOWN	rep2	WT	123.59
ENSMUSG00000024404	UP	rep1	KO	112.376
ENSMUSG00000024404	UP	rep2	KO	119.715
ENSMUSG00000024404	UP	rep1	WT	107.529
ENSMUSG00000024404	UP	rep2	WT	117.837
ENSMUSG00000024406	CONTROL	rep1	KO	130.789
ENSMUSG00000024406	CONTROL	rep2	KO	134.642
ENSMUSG00000024406	CONTROL	rep1	WT	95.7661
ENSMUSG00000024406	CONTROL	rep2	WT	100.45
ENSMUSG00000024423	DOWN	rep1	KO	114.4
ENSMUSG00000024423	DOWN	rep2	KO	142.932
ENSMUSG00000024423	DOWN	rep1	WT	135.948
ENSMUSG00000024423	DOWN	rep2	WT	143.543
ENSMUSG00000024474	CONTROL	rep1	KO	98.737
ENSMUSG00000024474	CONTROL	rep2	KO	97.2004
ENSMUSG00000024474	CONTROL	rep1	WT	122.621
ENSMUSG00000024474	CONTROL	rep2	WT	107.458
ENSMUSG00000024491	CONTROL	rep1	KO	76.6125
ENSMUSG00000024491	CONTROL	rep2	KO	109.04
ENSMUSG00000024491	CONTROL	rep1	WT	107.454
ENSMUSG00000024491	CONTROL	rep2	WT	110.71
ENSMUSG00000024498	CONTROL	rep1	KO	118.771
ENSMUSG00000024498	CONTROL	rep2	KO	128.466
ENSMUSG00000024498	CONTROL	rep1	WT	109.544
ENSMUSG00000024498	CONTROL	rep2	WT	106.176
ENSMUSG00000024525	DOWN	rep1	KO	101.871
ENSMUSG00000024525	DOWN	rep2	KO	112.556
ENSMUSG00000024525	DOWN	rep1	WT	80.9942
ENSMUSG00000024525	DOWN	rep2	WT	88.9763
ENSMUSG00000024571	DOWN	rep1	KO	102.824
ENSMUSG00000024571	DOWN	rep2	KO	120.25
ENSMUSG00000024571	DOWN	rep1	WT	87.7728
ENSMUSG00000024571	DOWN	rep2	WT	100.919
ENSMUSG00000024590	CONTROL	rep1	KO	118.489
ENSMUSG00000024590	CONTROL	rep2	KO	123.115
ENSMUSG00000024590	CONTROL	rep1	WT	98.1499
ENSMUSG00000024590	CONTROL	rep2	WT	106.893
ENSMUSG00000024594	CONTROL	rep1	KO	87.9003
ENSMUSG00000024594	CONTROL	rep2	KO	100.64
ENSMUSG00000024594	CONTROL	rep1	WT	93.8121
ENSMUSG00000024594	CONTROL	rep2	WT	97.4646
ENSMUSG00000024601	CONTROL	rep1	KO	91.519
ENSMUSG00000024601	CONTROL	rep2	KO	108.896
ENSMUSG00000024601	CONTROL	rep1	WT	99.1177
ENSMUSG00000024601	CONTROL	rep2	WT	101.139
ENSMUSG00000024604	CONTROL	rep1	KO	91.0314
ENSMUSG00000024604	CONTROL	rep2	KO	99.5334
ENSMUSG00000024604	CONTROL	rep1	WT	118.805
ENSMUSG00000024604	CONTROL	rep2	WT	124.8
ENSMUSG00000024640	CONTROL	rep1	KO	89.9569
ENSMUSG00000024640	CONTROL	rep2	KO	95.2345
ENSMUSG00000024640	CONTROL	rep1	WT	87.4
ENSMUSG00000024640	CONTROL	rep2	WT	94.157
ENSMUSG00000024646	CONTROL	rep1	KO	108.437
ENSMUSG00000024646	CONTROL	rep2	KO	114.157
ENSMUSG00000024646	CONTROL	rep1	WT	112.658
ENSMUSG00000024646	CONTROL	rep2	WT	115.494
ENSMUSG00000024661	DOWN	rep1	KO	105.361
ENSMUSG00000024661	DOWN	rep2	KO	106.256
ENSMUSG00000024661	DOWN	rep1	WT	104.695
ENSMUSG00000024661	DOWN	rep2	WT	102.596
ENSMUSG00000024683	CONTROL	rep1	KO	118.087
ENSMUSG00000024683	CONTROL	rep2	KO	104.39
ENSMUSG00000024683	CONTROL	rep1	WT	108.229
ENSMUSG00000024683	CONTROL	rep2	WT	107.636
ENSMUSG00000024735	DOWN	rep1	KO	113.577
ENSMUSG00000024735	DOWN	rep2	KO	119.609
ENSMUSG00000024735	DOWN	rep1	WT	112.833
ENSMUSG00000024735	DOWN	rep2	WT	132.152
ENSMUSG00000024740	CONTROL	rep1	KO	108.606
ENSMUSG00000024740	CONTROL	rep2	KO	111.478
ENSMUSG00000024740	CONTROL	rep1	WT	112.982
ENSMUSG00000024740	CONTROL	rep2	WT	114.793
ENSMUSG00000024772	CONTROL	rep1	KO	105.678
ENSMUSG00000024772	CONTROL	rep2	KO	108.688
ENSMUSG00000024772	CONTROL	rep1	WT	103.839
ENSMUSG00000024772	CONTROL	rep2	WT	95.4471
ENSMUSG00000024785	CONTROL	rep1	KO	93.8597
ENSMUSG00000024785	CONTROL	rep2	KO	107.215
ENSMUSG00000024785	CONTROL	rep1	WT	98.6544
ENSMUSG00000024785	CONTROL	rep2	WT	87.9132
ENSMUSG00000024791	CONTROL	rep1	KO	100.51
ENSMUSG00000024791	CONTROL	rep2	KO	91.6749
ENSMUSG00000024791	CONTROL	rep1	WT	103.333
ENSMUSG00000024791	CONTROL	rep2	WT	116.856
ENSMUSG00000024800	DOWN	rep1	KO	79.5346
ENSMUSG00000024800	DOWN	rep2	KO	89.4658
ENSMUSG00000024800	DOWN	rep1	WT	94.3576
ENSMUSG00000024800	DOWN	rep2	WT	98.5302
ENSMUSG00000024811	CONTROL	rep1	KO	120.38
ENSMUSG00000024811	CONTROL	rep2	KO	125.497
ENSMUSG00000024811	CONTROL	rep1	WT	121.964
ENSMUSG00000024811	CONTROL	rep2	WT	126.449
ENSMUSG00000024829	CONTROL	rep1	KO	105.462
ENSMUSG00000024829	CONTROL	rep2	KO	101.986
ENSMUSG00000024829	CONTROL	rep1	WT	110.695
ENSMUSG00000024829	CONTROL	rep2	WT	108.274
ENSMUSG00000024856	CONTROL	rep1	KO	141.833
ENSMUSG00000024856	CONTROL	rep2	KO	117.379
ENSMUSG00000024856	CONTROL	rep1	WT	127.546
ENSMUSG00000024856	CONTROL	rep2	WT	121.765
ENSMUSG00000024875	CONTROL	rep1	KO	97.8995
ENSMUSG00000024875	CONTROL	rep2	KO	86.0374
ENSMUSG00000024875	CONTROL	rep1	WT	102.512
ENSMUSG00000024875	CONTROL	rep2	WT	109.298
ENSMUSG00000024925	CONTROL	rep1	KO	79.132
ENSMUSG00000024925	CONTROL	rep2	KO	116.163
ENSMUSG00000024925	CONTROL	rep1	WT	122.184
ENSMUSG00000024925	CONTROL	rep2	WT	109.191
ENSMUSG00000024947	CONTROL	rep1	KO	124.088
ENSMUSG00000024947	CONTROL	rep2	KO	129.237
ENSMUSG00000024947	CONTROL	rep1	WT	109.662
ENSMUSG00000024947	CONTROL	rep2	WT	118.841
ENSMUSG00000024949	DOWN	rep1	KO	113.145
ENSMUSG00000024949	DOWN	rep2	KO	130.582
ENSMUSG00000024949	DOWN	rep1	WT	112.676
ENSMUSG00000024949	DOWN	rep2	WT	121.636
ENSMUSG00000024966	UP	rep1	KO	111.35
ENSMUSG00000024966	UP	rep2	KO	113.072
ENSMUSG00000024966	UP	rep1	WT	110.425
ENSMUSG00000024966	UP	rep2	WT	119.895
ENSMUSG00000024968	CONTROL	rep1	KO	118.137
ENSMUSG00000024968	CONTROL	rep2	KO	112.026
ENSMUSG00000024968	CONTROL	rep1	WT	116.287
ENSMUSG00000024968	CONTROL	rep2	WT	126.454
ENSMUSG00000025001	DOWN	rep1	KO	102.241
ENSMUSG00000025001	DOWN	rep2	KO	109.522
ENSMUSG00000025001	DOWN	rep1	WT	100.528
ENSMUSG00000025001	DOWN	rep2	WT	111.931
ENSMUSG00000025047	CONTROL	rep1	KO	102.393
ENSMUSG00000025047	CONTROL	rep2	KO	120.224
ENSMUSG00000025047	CONTROL	rep1	WT	120.282
ENSMUSG00000025047	CONTROL	rep2	WT	92.1431
ENSMUSG00000025066	CONTROL	rep1	KO	93.1796
ENSMUSG00000025066	CONTROL	rep2	KO	103.128
ENSMUSG00000025066	CONTROL	rep1	WT	100.579
ENSMUSG00000025066	CONTROL	rep2	WT	96.0821
ENSMUSG00000025068	DOWN	rep1	KO	108.718
ENSMUSG00000025068	DOWN	rep2	KO	107.468
ENSMUSG00000025068	DOWN	rep1	WT	91.0914
ENSMUSG00000025068	DOWN	rep2	WT	81.4875
ENSMUSG00000025135	CONTROL	rep1	KO	121.212
ENSMUSG00000025135	CONTROL	rep2	KO	112.134
ENSMUSG00000025135	CONTROL	rep1	WT	107.03
ENSMUSG00000025135	CONTROL	rep2	WT	102.571
ENSMUSG00000025203	CONTROL	rep1	KO	119.743
ENSMUSG00000025203	CONTROL	rep2	KO	129.556
ENSMUSG00000025203	CONTROL	rep1	WT	139.01
ENSMUSG00000025203	CONTROL	rep2	WT	133.078
ENSMUSG00000025260	CONTROL	rep1	KO	91.0342
ENSMUSG00000025260	CONTROL	rep2	KO	92.8505
ENSMUSG00000025260	CONTROL	rep1	WT	82.1471
ENSMUSG00000025260	CONTROL	rep2	WT	86.7811
ENSMUSG00000025332	CONTROL	rep1	KO	125.939
ENSMUSG00000025332	CONTROL	rep2	KO	117.979
ENSMUSG00000025332	CONTROL	rep1	WT	111.264
ENSMUSG00000025332	CONTROL	rep2	WT	138.185
ENSMUSG00000025371	CONTROL	rep1	KO	111.923
ENSMUSG00000025371	CONTROL	rep2	KO	118.656
ENSMUSG00000025371	CONTROL	rep1	WT	101.44
ENSMUSG00000025371	CONTROL	rep2	WT	111.922
ENSMUSG00000025381	CONTROL	rep1	KO	87.2829
ENSMUSG00000025381	CONTROL	rep2	KO	95.3741
ENSMUSG00000025381	CONTROL	rep1	WT	89.4697
ENSMUSG00000025381	CONTROL	rep2	WT	100.977
ENSMUSG00000025393	DOWN	rep1	KO	79.8771
ENSMUSG00000025393	DOWN	rep2	KO	96.4829
ENSMUSG00000025393	DOWN	rep1	WT	104.995
ENSMUSG00000025393	DOWN	rep2	WT	92.1177
ENSMUSG00000025395	DOWN	rep1	KO	104.212
ENSMUSG00000025395	DOWN	rep2	KO	108.629
ENSMUSG00000025395	DOWN	rep1	WT	104.848
ENSMUSG00000025395	DOWN	rep2	WT	99.3334
ENSMUSG00000025423	CONTROL	rep1	KO	93.6965
ENSMUSG00000025423	CONTROL	rep2	KO	124.859
ENSMUSG00000025423	CONTROL	rep1	WT	110.424
ENSMUSG00000025423	CONTROL	rep2	WT	124.372
ENSMUSG00000025428	DOWN	rep1	KO	99.7451
ENSMUSG00000025428	DOWN	rep2	KO	102.121
ENSMUSG00000025428	DOWN	rep1	WT	99.0393
ENSMUSG00000025428	DOWN	rep2	WT	98.7264
ENSMUSG00000025439	DOWN	rep1	KO	106.671
ENSMUSG00000025439	DOWN	rep2	KO	100.531
ENSMUSG00000025439	DOWN	rep1	WT	97.2122
ENSMUSG00000025439	DOWN	rep2	WT	91.8898
ENSMUSG00000025487	UP	rep1	KO	90.4974
ENSMUSG00000025487	UP	rep2	KO	93.8452
ENSMUSG00000025487	UP	rep1	WT	88.5673
ENSMUSG00000025487	UP	rep2	WT	97.686
ENSMUSG00000025491	CONTROL	rep1	KO	127.551
ENSMUSG00000025491	CONTROL	rep2	KO	126.297
ENSMUSG00000025491	CONTROL	rep1	WT	101.96
ENSMUSG00000025491	CONTROL	rep2	WT	93.9411
ENSMUSG00000025495	CONTROL	rep1	KO	101.956
ENSMUSG00000025495	CONTROL	rep2	KO	101.882
ENSMUSG00000025495	CONTROL	rep1	WT	100.565
ENSMUSG00000025495	CONTROL	rep2	WT	101.465
ENSMUSG00000025503	CONTROL	rep1	KO	102.045
ENSMUSG00000025503	CONTROL	rep2	KO	115.185
ENSMUSG00000025503	CONTROL	rep1	WT	105.874
ENSMUSG00000025503	CONTROL	rep2	WT	99.2892
ENSMUSG00000025510	CONTROL	rep1	KO	103.705
ENSMUSG00000025510	CONTROL	rep2	KO	115.435
ENSMUSG00000025510	CONTROL	rep1	WT	107.394
ENSMUSG00000025510	CONTROL	rep2	WT	124.843
ENSMUSG00000025511	UP	rep1	KO	90.6938
ENSMUSG00000025511	UP	rep2	KO	107.406
ENSMUSG00000025511	UP	rep1	WT	104.328
ENSMUSG00000025511	UP	rep2	WT	87.5113
ENSMUSG00000025521	DOWN	rep1	KO	91.6447
ENSMUSG00000025521	DOWN	rep2	KO	89.884
ENSMUSG00000025521	DOWN	rep1	WT	89.7874
ENSMUSG00000025521	DOWN	rep2	WT	101.293
ENSMUSG00000025538	CONTROL	rep1	KO	110.081
ENSMUSG00000025538	CONTROL	rep2	KO	118.035
ENSMUSG00000025538	CONTROL	rep1	WT	99.404
ENSMUSG00000025538	CONTROL	rep2	WT	101.661
ENSMUSG00000025544	DOWN	rep1	KO	120.26
ENSMUSG00000025544	DOWN	rep2	KO	114.1
ENSMUSG00000025544	DOWN	rep1	WT	91.0846
ENSMUSG00000025544	DOWN	rep2	WT	115.556
ENSMUSG00000025545	UP	rep1	KO	85.9946
ENSMUSG00000025545	UP	rep2	KO	99.4776
ENSMUSG00000025545	UP	rep1	WT	99.8787
ENSMUSG00000025545	UP	rep2	WT	123.789
ENSMUSG00000025630	DOWN	rep1	KO	92.7597
ENSMUSG00000025630	DOWN	rep2	KO	95.0405
ENSMUSG00000025630	DOWN	rep1	WT	85.7761
ENSMUSG00000025630	DOWN	rep2	WT	90.0956
ENSMUSG00000025647	UP	rep1	KO	96.8615
ENSMUSG00000025647	UP	rep2	KO	99.8251
ENSMUSG00000025647	UP	rep1	WT	113.214
ENSMUSG00000025647	UP	rep2	WT	123.331
ENSMUSG00000025651	CONTROL	rep1	KO	89.1204
ENSMUSG00000025651	CONTROL	rep2	KO	107.905
ENSMUSG00000025651	CONTROL	rep1	WT	110.329
ENSMUSG00000025651	CONTROL	rep2	WT	88.36
ENSMUSG00000025747	CONTROL	rep1	KO	100.219
ENSMUSG00000025747	CONTROL	rep2	KO	101.974
ENSMUSG00000025747	CONTROL	rep1	WT	108.014
ENSMUSG00000025747	CONTROL	rep2	WT	117.146
ENSMUSG00000025764	DOWN	rep1	KO	92.5702
ENSMUSG00000025764	DOWN	rep2	KO	117.036
ENSMUSG00000025764	DOWN	rep1	WT	104.946
ENSMUSG00000025764	DOWN	rep2	WT	117.87
ENSMUSG00000025809	CONTROL	rep1	KO	121.462
ENSMUSG00000025809	CONTROL	rep2	KO	142.274
ENSMUSG00000025809	CONTROL	rep1	WT	115.02
ENSMUSG00000025809	CONTROL	rep2	WT	128.49
ENSMUSG00000025825	DOWN	rep1	KO	104.22
ENSMUSG00000025825	DOWN	rep2	KO	103.71
ENSMUSG00000025825	DOWN	rep1	WT	101.394
ENSMUSG00000025825	DOWN	rep2	WT	114.836
ENSMUSG00000025868	UP	rep1	KO	96.9384
ENSMUSG00000025868	UP	rep2	KO	100.422
ENSMUSG00000025868	UP	rep1	WT	97.519
ENSMUSG00000025868	UP	rep2	WT	92.1476
ENSMUSG00000025873	CONTROL	rep1	KO	109.339
ENSMUSG00000025873	CONTROL	rep2	KO	111.524
ENSMUSG00000025873	CONTROL	rep1	WT	122.371
ENSMUSG00000025873	CONTROL	rep2	WT	102.368
ENSMUSG00000025925	DOWN	rep1	KO	128.794
ENSMUSG00000025925	DOWN	rep2	KO	116
ENSMUSG00000025925	DOWN	rep1	WT	99.0235
ENSMUSG00000025925	DOWN	rep2	WT	129.879
ENSMUSG00000025967	DOWN	rep1	KO	82.4479
ENSMUSG00000025967	DOWN	rep2	KO	89.3166
ENSMUSG00000025967	DOWN	rep1	WT	81.5592
ENSMUSG00000025967	DOWN	rep2	WT	81.0201
ENSMUSG00000025979	UP	rep1	KO	116.875
ENSMUSG00000025979	UP	rep2	KO	124.203
ENSMUSG00000025979	UP	rep1	WT	126.371
ENSMUSG00000025979	UP	rep2	WT	111.866
ENSMUSG00000025980	DOWN	rep1	KO	99.1715
ENSMUSG00000025980	DOWN	rep2	KO	104.703
ENSMUSG00000025980	DOWN	rep1	WT	94.386
ENSMUSG00000025980	DOWN	rep2	WT	92.1729
ENSMUSG00000026019	CONTROL	rep1	KO	97.2171
ENSMUSG00000026019	CONTROL	rep2	KO	108.793
ENSMUSG00000026019	CONTROL	rep1	WT	85.0956
ENSMUSG00000026019	CONTROL	rep2	WT	96.9293
ENSMUSG00000026036	CONTROL	rep1	KO	112.669
ENSMUSG00000026036	CONTROL	rep2	KO	106.074
ENSMUSG00000026036	CONTROL	rep1	WT	100.837
ENSMUSG00000026036	CONTROL	rep2	WT	112.478
ENSMUSG00000026150	CONTROL	rep1	KO	117.177
ENSMUSG00000026150	CONTROL	rep2	KO	121.124
ENSMUSG00000026150	CONTROL	rep1	WT	116.554
ENSMUSG00000026150	CONTROL	rep2	WT	128.556
ENSMUSG00000026159	CONTROL	rep1	KO	98.76
ENSMUSG00000026159	CONTROL	rep2	KO	98.6836
ENSMUSG00000026159	CONTROL	rep1	WT	103.325
ENSMUSG00000026159	CONTROL	rep2	WT	103.735
ENSMUSG00000026174	DOWN	rep1	KO	117.656
ENSMUSG00000026174	DOWN	rep2	KO	118.757
ENSMUSG00000026174	DOWN	rep1	WT	98.88
ENSMUSG00000026174	DOWN	rep2	WT	107.537
ENSMUSG00000026187	DOWN	rep1	KO	102.284
ENSMUSG00000026187	DOWN	rep2	KO	114.704
ENSMUSG00000026187	DOWN	rep1	WT	95.9288
ENSMUSG00000026187	DOWN	rep2	WT	111.02
ENSMUSG00000026192	DOWN	rep1	KO	99.2955
ENSMUSG00000026192	DOWN	rep2	KO	113.605
ENSMUSG00000026192	DOWN	rep1	WT	101.068
ENSMUSG00000026192	DOWN	rep2	WT	93.9332
ENSMUSG00000026201	CONTROL	rep1	KO	98.6529
ENSMUSG00000026201	CONTROL	rep2	KO	139.298
ENSMUSG00000026201	CONTROL	rep1	WT	91.4947
ENSMUSG00000026201	CONTROL	rep2	WT	117.153
ENSMUSG00000026240	CONTROL	rep1	KO	135.106
ENSMUSG00000026240	CONTROL	rep2	KO	125.165
ENSMUSG00000026240	CONTROL	rep1	WT	122.394
ENSMUSG00000026240	CONTROL	rep2	WT	127.856
ENSMUSG00000026248	DOWN	rep1	KO	103.534
ENSMUSG00000026248	DOWN	rep2	KO	110.527
ENSMUSG00000026248	DOWN	rep1	WT	87.534
ENSMUSG00000026248	DOWN	rep2	WT	107.892
ENSMUSG00000026254	CONTROL	rep1	KO	101.761
ENSMUSG00000026254	CONTROL	rep2	KO	110.351
ENSMUSG00000026254	CONTROL	rep1	WT	89.8177
ENSMUSG00000026254	CONTROL	rep2	WT	102.174
ENSMUSG00000026275	CONTROL	rep1	KO	92.9817
ENSMUSG00000026275	CONTROL	rep2	KO	103.377
ENSMUSG00000026275	CONTROL	rep1	WT	105.863
ENSMUSG00000026275	CONTROL	rep2	WT	103.709
ENSMUSG00000026276	DOWN	rep1	KO	125.229
ENSMUSG00000026276	DOWN	rep2	KO	149.15
ENSMUSG00000026276	DOWN	rep1	WT	132.088
ENSMUSG00000026276	DOWN	rep2	WT	129.347
ENSMUSG00000026353	CONTROL	rep1	KO	118.584
ENSMUSG00000026353	CONTROL	rep2	KO	106.888
ENSMUSG00000026353	CONTROL	rep1	WT	95.809
ENSMUSG00000026353	CONTROL	rep2	WT	112.89
ENSMUSG00000026377	CONTROL	rep1	KO	95.7455
ENSMUSG00000026377	CONTROL	rep2	KO	101.912
ENSMUSG00000026377	CONTROL	rep1	WT	94.8116
ENSMUSG00000026377	CONTROL	rep2	WT	101.3
ENSMUSG00000026380	DOWN	rep1	KO	118.343
ENSMUSG00000026380	DOWN	rep2	KO	131.499
ENSMUSG00000026380	DOWN	rep1	WT	83.5882
ENSMUSG00000026380	DOWN	rep2	WT	111.75
ENSMUSG00000026385	UP	rep1	KO	115.852
ENSMUSG00000026385	UP	rep2	KO	113.616
ENSMUSG00000026385	UP	rep1	WT	118.579
ENSMUSG00000026385	UP	rep2	WT	117.64
ENSMUSG00000026421	UP	rep1	KO	122.269
ENSMUSG00000026421	UP	rep2	KO	123.048
ENSMUSG00000026421	UP	rep1	WT	119.562
ENSMUSG00000026421	UP	rep2	WT	114.6
ENSMUSG00000026429	DOWN	rep1	KO	166.626
ENSMUSG00000026429	DOWN	rep2	KO	152.737
ENSMUSG00000026429	DOWN	rep1	WT	115.898
ENSMUSG00000026429	DOWN	rep2	WT	134.698
ENSMUSG00000026456	CONTROL	rep1	KO	142.44
ENSMUSG00000026456	CONTROL	rep2	KO	151.496
ENSMUSG00000026456	CONTROL	rep1	WT	110.024
ENSMUSG00000026456	CONTROL	rep2	WT	134.872
ENSMUSG00000026457	CONTROL	rep1	KO	107.173
ENSMUSG00000026457	CONTROL	rep2	KO	100.985
ENSMUSG00000026457	CONTROL	rep1	WT	109.699
ENSMUSG00000026457	CONTROL	rep2	WT	106.71
ENSMUSG00000026473	DOWN	rep1	KO	108.588
ENSMUSG00000026473	DOWN	rep2	KO	110.914
ENSMUSG00000026473	DOWN	rep1	WT	93.9852
ENSMUSG00000026473	DOWN	rep2	WT	99.661
ENSMUSG00000026496	DOWN	rep1	KO	106.171
ENSMUSG00000026496	DOWN	rep2	KO	112.829
ENSMUSG00000026496	DOWN	rep1	WT	95.7509
ENSMUSG00000026496	DOWN	rep2	WT	92.0929
ENSMUSG00000026511	DOWN	rep1	KO	141.118
ENSMUSG00000026511	DOWN	rep2	KO	118.98
ENSMUSG00000026511	DOWN	rep1	WT	100.832
ENSMUSG00000026511	DOWN	rep2	WT	120.449
ENSMUSG00000026520	CONTROL	rep1	KO	79.0954
ENSMUSG00000026520	CONTROL	rep2	KO	95.5183
ENSMUSG00000026520	CONTROL	rep1	WT	100.184
ENSMUSG00000026520	CONTROL	rep2	WT	93.4663
ENSMUSG00000026547	UP	rep1	KO	110.808
ENSMUSG00000026547	UP	rep2	KO	113.036
ENSMUSG00000026547	UP	rep1	WT	101.987
ENSMUSG00000026547	UP	rep2	WT	103.258
ENSMUSG00000026554	CONTROL	rep1	KO	193.344
ENSMUSG00000026554	CONTROL	rep2	KO	154.673
ENSMUSG00000026554	CONTROL	rep1	WT	161.692
ENSMUSG00000026554	CONTROL	rep2	WT	123.294
ENSMUSG00000026575	DOWN	rep1	KO	109.399
ENSMUSG00000026575	DOWN	rep2	KO	106.822
ENSMUSG00000026575	DOWN	rep1	WT	107.826
ENSMUSG00000026575	DOWN	rep2	WT	115.51
ENSMUSG00000026615	CONTROL	rep1	KO	119.397
ENSMUSG00000026615	CONTROL	rep2	KO	121.534
ENSMUSG00000026615	CONTROL	rep1	WT	101.985
ENSMUSG00000026615	CONTROL	rep2	WT	96.7686
ENSMUSG00000026617	CONTROL	rep1	KO	113.39
ENSMUSG00000026617	CONTROL	rep2	KO	122.68
ENSMUSG00000026617	CONTROL	rep1	WT	115.807
ENSMUSG00000026617	CONTROL	rep2	WT	129.995
ENSMUSG00000026622	DOWN	rep1	KO	131.872
ENSMUSG00000026622	DOWN	rep2	KO	97.2341
ENSMUSG00000026622	DOWN	rep1	WT	111.665
ENSMUSG00000026622	DOWN	rep2	WT	105.176
ENSMUSG00000026643	UP	rep1	KO	119.642
ENSMUSG00000026643	UP	rep2	KO	128.107
ENSMUSG00000026643	UP	rep1	WT	131.289
ENSMUSG00000026643	UP	rep2	WT	114.59
ENSMUSG00000026662	DOWN	rep1	KO	120.665
ENSMUSG00000026662	DOWN	rep2	KO	125.364
ENSMUSG00000026662	DOWN	rep1	WT	114.287
ENSMUSG00000026662	DOWN	rep2	WT	104.106
ENSMUSG00000026687	DOWN	rep1	KO	101.557
ENSMUSG00000026687	DOWN	rep2	KO	106.525
ENSMUSG00000026687	DOWN	rep1	WT	98.2499
ENSMUSG00000026687	DOWN	rep2	WT	103.602
ENSMUSG00000026728	DOWN	rep1	KO	80.8407
ENSMUSG00000026728	DOWN	rep2	KO	103.14
ENSMUSG00000026728	DOWN	rep1	WT	73.8491
ENSMUSG00000026728	DOWN	rep2	WT	81.6815
ENSMUSG00000026750	DOWN	rep1	KO	82.6032
ENSMUSG00000026750	DOWN	rep2	KO	88.7256
ENSMUSG00000026750	DOWN	rep1	WT	87.4096
ENSMUSG00000026750	DOWN	rep2	WT	88.5782
ENSMUSG00000026755	CONTROL	rep1	KO	94.5394
ENSMUSG00000026755	CONTROL	rep2	KO	114.493
ENSMUSG00000026755	CONTROL	rep1	WT	104.717
ENSMUSG00000026755	CONTROL	rep2	WT	103.236
ENSMUSG00000026775	CONTROL	rep1	KO	126.436
ENSMUSG00000026775	CONTROL	rep2	KO	150.647
ENSMUSG00000026775	CONTROL	rep1	WT	122.239
ENSMUSG00000026775	CONTROL	rep2	WT	130.62
ENSMUSG00000026790	CONTROL	rep1	KO	115.202
ENSMUSG00000026790	CONTROL	rep2	KO	123.276
ENSMUSG00000026790	CONTROL	rep1	WT	101.679
ENSMUSG00000026790	CONTROL	rep2	WT	93.0265
ENSMUSG00000026810	CONTROL	rep1	KO	121.245
ENSMUSG00000026810	CONTROL	rep2	KO	123.247
ENSMUSG00000026810	CONTROL	rep1	WT	103.29
ENSMUSG00000026810	CONTROL	rep2	WT	120.783
ENSMUSG00000026843	CONTROL	rep1	KO	122.601
ENSMUSG00000026843	CONTROL	rep2	KO	146.056
ENSMUSG00000026843	CONTROL	rep1	WT	137.412
ENSMUSG00000026843	CONTROL	rep2	WT	132.228
ENSMUSG00000026857	CONTROL	rep1	KO	116.517
ENSMUSG00000026857	CONTROL	rep2	KO	124.217
ENSMUSG00000026857	CONTROL	rep1	WT	70.5021
ENSMUSG00000026857	CONTROL	rep2	WT	124.352
ENSMUSG00000026914	DOWN	rep1	KO	100.446
ENSMUSG00000026914	DOWN	rep2	KO	105.458
ENSMUSG00000026914	DOWN	rep1	WT	98.5583
ENSMUSG00000026914	DOWN	rep2	WT	97.7778
ENSMUSG00000026917	DOWN	rep1	KO	118.631
ENSMUSG00000026917	DOWN	rep2	KO	120.671
ENSMUSG00000026917	DOWN	rep1	WT	117.147
ENSMUSG00000026917	DOWN	rep2	WT	108.392
ENSMUSG00000026921	UP	rep1	KO	85.8418
ENSMUSG00000026921	UP	rep2	KO	114.86
ENSMUSG00000026921	UP	rep1	WT	101.114
ENSMUSG00000026921	UP	rep2	WT	103.405
ENSMUSG00000026955	CONTROL	rep1	KO	108.27
ENSMUSG00000026955	CONTROL	rep2	KO	126.275
ENSMUSG00000026955	CONTROL	rep1	WT	145.726
ENSMUSG00000026955	CONTROL	rep2	WT	129.071
ENSMUSG00000026977	CONTROL	rep1	KO	104.864
ENSMUSG00000026977	CONTROL	rep2	KO	119.896
ENSMUSG00000026977	CONTROL	rep1	WT	113.661
ENSMUSG00000026977	CONTROL	rep2	WT	117.172
ENSMUSG00000026991	CONTROL	rep1	KO	133.808
ENSMUSG00000026991	CONTROL	rep2	KO	149.649
ENSMUSG00000026991	CONTROL	rep1	WT	102.465
ENSMUSG00000026991	CONTROL	rep2	WT	112.218
ENSMUSG00000027006	UP	rep1	KO	112.425
ENSMUSG00000027006	UP	rep2	KO	125.865
ENSMUSG00000027006	UP	rep1	WT	124.929
ENSMUSG00000027006	UP	rep2	WT	124.266
ENSMUSG00000027011	CONTROL	rep1	KO	106.253
ENSMUSG00000027011	CONTROL	rep2	KO	133.781
ENSMUSG00000027011	CONTROL	rep1	WT	115.783
ENSMUSG00000027011	CONTROL	rep2	WT	94.1589
ENSMUSG00000027018	DOWN	rep1	KO	112.056
ENSMUSG00000027018	DOWN	rep2	KO	106.419
ENSMUSG00000027018	DOWN	rep1	WT	98.6311
ENSMUSG00000027018	DOWN	rep2	WT	100.663
ENSMUSG00000027067	CONTROL	rep1	KO	97.3128
ENSMUSG00000027067	CONTROL	rep2	KO	113.391
ENSMUSG00000027067	CONTROL	rep1	WT	103.735
ENSMUSG00000027067	CONTROL	rep2	WT	108.705
ENSMUSG00000027133	DOWN	rep1	KO	115.895
ENSMUSG00000027133	DOWN	rep2	KO	123.998
ENSMUSG00000027133	DOWN	rep1	WT	114.537
ENSMUSG00000027133	DOWN	rep2	WT	116.983
ENSMUSG00000027160	DOWN	rep1	KO	101.065
ENSMUSG00000027160	DOWN	rep2	KO	104.532
ENSMUSG00000027160	DOWN	rep1	WT	99.19
ENSMUSG00000027160	DOWN	rep2	WT	101.113
ENSMUSG00000027162	CONTROL	rep1	KO	107.385
ENSMUSG00000027162	CONTROL	rep2	KO	125.244
ENSMUSG00000027162	CONTROL	rep1	WT	129.512
ENSMUSG00000027162	CONTROL	rep2	WT	134.835
ENSMUSG00000027203	DOWN	rep1	KO	106.255
ENSMUSG00000027203	DOWN	rep2	KO	117.975
ENSMUSG00000027203	DOWN	rep1	WT	112.795
ENSMUSG00000027203	DOWN	rep2	WT	112.347
ENSMUSG00000027248	CONTROL	rep1	KO	106.048
ENSMUSG00000027248	CONTROL	rep2	KO	122.192
ENSMUSG00000027248	CONTROL	rep1	WT	106.993
ENSMUSG00000027248	CONTROL	rep2	WT	112.969
ENSMUSG00000027285	DOWN	rep1	KO	116.326
ENSMUSG00000027285	DOWN	rep2	KO	118.003
[truncated: 2,730 more rows]
